# Supplementary material for: Vinylogous Nicholas reactions in the synthesis of bi- and tricyclic cycloheptynedicobalt complexes
Source: Royal Society of Chemistry journal article supplement (doi:10.1039/c5ob01684c), 2015-01-01

## Supporting Information

### Vinylogous Nicholas Reactions in the Synthesis of Bi- and Tricyclic Cycloheptynedicobalt Complexes

Izabela Kolodziej, James R. Green\*

Department of Chemistry and Biochemistry, University of Windsor, Windsor, ON, N9B 3P4, Canada

#### Table of Contents

|                                                                 |           |
|-----------------------------------------------------------------|-----------|
| Experimental Section                                            | p. 1-29   |
| Spectral Data ( <sup>1</sup> H and <sup>13</sup> C NMR spectra) | p. 30-260 |

#### [(3,5-Dimethoxyphenyl)ethynyl]trimethylsilane (7'd)

To a mixture of Pd(PPh<sub>3</sub>)<sub>4</sub> (0.6131 g, 0.531 mmol, 3 mol%) and CuI (0.1684 g, 0.884 mmol, 5 mol%) was added a solution of 1-bromo-3,5-dimethoxybenzene (3.8393 g, 17.684 mmol) in THF (12 mL), followed by trimethylsilylacetylene (5.0 mL, 35 mmol). Triethylamine (118 mL) was added and the mixture stirred for 20 h. The mixture was filtered through Celite® and subjected to a conventional extractive workup (Et<sub>2</sub>O). Following flash chromatography (15:1 hexanes:Et<sub>2</sub>O), compound **7'd** was isolated as a colourless solid (3.6129 g, 15.433 mmol, 87%), mp. 62-63 °C (lit., 61-65 °C<sup>1</sup>), and which was characterized as spectroscopically identical to reported values.<sup>1</sup>

#### 2-(Phenylethynyl)cyclohex-1-enecarbaldehyde (9b)

Compound **9b** was synthesized from phenylacetylene (0.2773 g, 2.717 mmol) and 2-bromocyclohex-1-ene-1-carbaldehyde (**8b**)<sup>2</sup> (0.7134 g, 4.076 mmol) according to General Procedure A at a reaction temperature of 80 °C using an oil bath. The product was isolated using preparative TLC (25:1 hexanes:Et<sub>2</sub>O) as a yellow oil (0.4687 g, 2.231 mmol, 82%). <sup>1</sup>H-NMR (500 MHz, CDCl<sub>3</sub>): 10.32 (s, 1H), 7.47-7.49 (m, 2H), 7.35-7.37 (m, 3H), 2.52 (t, 2H, J = 6.1), 2.31 (t, 2H, J = 6.2), 1.66-1.75 (m, 4H); <sup>13</sup>C-NMR (75 MHz, CDCl<sub>3</sub>): 193.0, 142.7, 140.1, 131.8, 129.2, 128.6, 122.4, 98.7, 86.4, 32.5, 22.2, 22.0, 21.2; IR (KBr): 2934, 2835, 2199, 1673, 1604, 1223; HRMS: m/e for C<sub>15</sub>H<sub>14</sub>O calculated 210.1045 (M<sup>+</sup>), found 210.1045.

#### 2-[(3,4-Dimethoxyphenyl)ethynyl]cyclohex-1-enecarbaldehyde (9d)

Compound **7c**<sup>3</sup> (0.8136 g, 5.020 mmol) was subjected to Sonogashira conditions according to General Procedure A with 2-bromocyclohex-1-ene-1-carbaldehyde (**8b**) (1.4306 g, 7.5302

mmol). Compound **9d** was isolated as a yellow oil (1.0838 g, 4.0122 mmol, 80%) via flash chromatography (10:1 hexanes:Et<sub>2</sub>O), and was characterized as spectroscopically identical to reported values.<sup>4</sup>

### **2-[(3,5-Dimethoxyphenyl)ethynyl]cyclohex-1-enecarbaldehyde (9f)**

Compound **7'd** (0.8926 g, 3.813 mmol) was subjected to a tandem desilylation/Sonogashira reaction according to General Procedure B with 2-bromocyclohex-1-ene-1-carbaldehyde (**8b**) (1.0866 g, 5.7192 mmol). The coupled product (**9f**) was isolated as a yellow oil (0.9252 g, 3.425 mmol, 90%) following flash chromatography (10:1 hexanes:Et<sub>2</sub>O). <sup>1</sup>H-NMR (500 MHz, CDCl<sub>3</sub>): 10.30 (s, 1H), 6.60 (d, 2H, J = 2.2), 6.47 (t, 1H, J = 2.1), 3.78 (s, 6H), 2.50 (t, 2H, J = 6.1), 2.29 (t, 2H, J = 6.1), 1.64-1.73 (m, 4H); <sup>13</sup>C-NMR (75 MHz, CDCl<sub>3</sub>): 192.9, 160.7, 142.9, 139.9, 123.6, 109.5, 102.6, 98.6, 85.8, 55.6, 32.4, 22.2, 22.0, 21.1; IR (KBr): 3001, 2937, 2838, 2197, 1672, 1594, 1421, 1208; HRMS: m/e for C<sub>17</sub>H<sub>18</sub>O<sub>3</sub> calculated 270.1256 (M<sup>+</sup>), found 270.1251.

### **2-[(2,5-Dimethoxyphenyl)ethynyl]cyclopent-1-enecarbaldehyde (9g)**

Compound **7e**<sup>5</sup> (0.6523 g, 4.025 mmol) was subjected to Sonogashira chemistry according to General Procedure A with 2-bromocyclopent-1-ene-1-carbaldehyde (**8a**) (1.0567 g, 6.0373 mmol). Product **9g** was isolated as a cream-coloured solid (0.8184 g, 3.196 mmol, 79%) following flash chromatography (10:1 hexanes:Et<sub>2</sub>O). mp. 109-110 °C; <sup>1</sup>H-NMR (500 MHz, CDCl<sub>3</sub>): 10.21 (s, 1H), 6.97 (d, 1H, J = 3.0), 6.92 (dd, 1H, J = 9.0, J = 3.1), 6.83 (d, 1H, J = 9.1), 3.85 (s, 3H), 3.78 (s, 3H), 2.82 (t, 2H, J = 7.8), 2.66 (t, 2H, J = 7.8), 2.01 (apparent pentet, 2H, J = 7.8); <sup>13</sup>C-NMR (75 MHz, CDCl<sub>3</sub>): 189.6, 155.1, 153.3, 148.1, 143.5, 117.9, 117.3, 112.1, 111.8, 97.4, 87.5, 56.5, 56.0, 38.9, 29.7, 22.4; IR (KBr): 2960, 2834, 2193, 1667, 1500, 1238; HRMS: m/e for C<sub>16</sub>H<sub>16</sub>O<sub>3</sub> calculated 256.256.1099 (M<sup>+</sup>), found 256.1087.

### **5-Iodo-1-isopropyl-2,3-dimethoxybenzene**

2-(2,3-Dimethoxyphenyl)propan-2-ol<sup>6</sup> (5.5598 g, 28.332 mmol), I<sub>2</sub> (4.3145 g, 16.999 mmol) and (diacetoxyiodo)benzene (10.0383 g, 31.166 mmol) were ground together using a mortar and pestle for 30 min, and left for 72 h. The mixture was dissolved in a mixture of CH<sub>2</sub>Cl<sub>2</sub> and Na<sub>2</sub>S<sub>2</sub>O<sub>3</sub> (aq, sat) and given a conventional extractive workup. Following Kugelrohr distillation at 0.1 Torr, the crude iodinated and dehydrated 5-iodo-1,2-dimethoxy-3-(prop-1-en-2-yl)benzene was dissolved in methanol (150 mL) along with Wilkinson's catalyst (0.5700 g, 0.6161 mmol). H<sub>2</sub> was bubbled through the solution, which was stirring at room temperature. Starting material

consumption was complete after 1.5 days, as assessed by  $^1\text{H}$ -NMR spectroscopy. The solvent was removed under reduced pressure, and Kugelrohr distillation at 0.1 Torr afforded 5-Iodo-1-isopropyl-2,3-dimethoxybenzene as a pale yellow oil (7.4897 g, 24.475 mmol, 86%).  $^1\text{H}$ -NMR (500 MHz,  $\text{CDCl}_3$ ): 7.16 (d, 1H,  $J = 1.8$ ), 7.04 (d, 1H,  $J = 1.8$ ), 3.84 (s, 3H), 3.80 (s, 3H), 3.29 (septet, 1H,  $J = 7.1$ ), 1.20 (d, 6H,  $J = 7.1$ );  $^{13}\text{C}$ -NMR (125 MHz,  $\text{CDCl}_3$ ): 153.4, 146.4, 144.7, 127.8, 119.1, 87.3, 61.0, 56.0, 26.7, 23.4; IR (KBr): 2962, 2870, 2004, 1568, 1479, 1291, 1218; HRMS:  $m/e$  for  $\text{C}_{11}\text{H}_{15}\text{IO}_2$  calculated 306.0117 ( $\text{M}^+$ ), found 306.0122.

#### **[(3-Isopropyl-4,5-dimethoxyphenyl)ethynyl]trimethylsilane**

[(3-Isopropyl-4,5-dimethoxyphenyl)ethynyl]trimethylsilane was synthesized from 5-iodo-1-isopropyl-2,3-dimethoxybenzene (2.2563 g, 7.3732 mmol) and trimethylsilylacetylene (2.1 mL, 15 mmol) according to General Procedure A at room temperature, with the exception that THF as solvent was substituted for DMF. The target compound was isolated by flash chromatography (10:1 hexanes: $\text{Et}_2\text{O}$ ) as a pale yellow oil (2.0005 g, 7.2441 mmol, 98%).  $^1\text{H}$ -NMR (500 MHz,  $\text{CDCl}_3$ ): 7.00 (d, 1H,  $J = 1.8$ ), 6.87 (d, 1H,  $J = 1.8$ ), 3.86 (s, 3H), 3.82 (s, 3H), 3.32 (septet, 1H,  $J = 6.9$ ), 1.21 (d, 6H,  $J = 6.94$ ), 0.27 (s, 9H);  $^{13}\text{C}$ -NMR (125 MHz,  $\text{CDCl}_3$ ): 152.2, 147.2, 142.5, 122.8, 118.9, 113.2, 105.5, 92.6, 61.0, 55.8, 26.8, 23.3, 0.08; IR (KBr): 2962, 2152, 1573, 1484, 1317, 1250; HRMS:  $m/e$  for  $\text{C}_{16}\text{H}_{24}\text{O}_2\text{Si}$  calculated 276.1546 ( $\text{M}^+$ ), found 276.1542.

#### **5-Ethynyl-1-isopropyl-2,3-dimethoxybenzene (7h)**

[(3-Isopropyl-4,5-dimethoxyphenyl)ethynyl]trimethylsilane (2.0005 g, 7.2441 mmol) was subjected to desilylation according to General Procedure H. The product was isolated via flash chromatography (10:1 hexanes: $\text{Et}_2\text{O}$ ) as a pale yellow oil (1.3196 g, 6.4650 mmol, 89%).  $^1\text{H}$ -NMR (500 MHz,  $\text{CDCl}_3$ ): 7.03 (d, 1H,  $J = 1.8$ ), 6.89 (d, 1H,  $J = 1.9$ ), 3.85 (s, 3H), 3.83 (s, 3H), 3.33 (septet, 1H,  $J = 6.9$ ), 3.03 (s, 1H), 1.21 (d, 6H,  $J = 6.9$ );  $^{13}\text{C}$ -NMR (125 MHz,  $\text{CDCl}_3$ ): 152.3, 147.4, 142.6, 123.0, 117.4, 113.4, 84.1, 75.9, 61.0, 55.8, 26.7, 23.3; IR (KBr): 3286, 2962, 2830, 2107, 1577, 1316, 1224; HRMS:  $m/e$  for  $\text{C}_{13}\text{H}_{16}\text{O}_2$  calculated 204.1150 ( $\text{M}^+$ ), found 204.1145.

#### **2-[(2,5-Dimethoxyphenyl)ethynyl]cyclohex-1-enecarbaldehyde (9h)**

Compound **7e** (0.7563 g, 4.666 mmol) was subjected to Sonogashira chemistry according to General Procedure A with 2-bromocyclohex-1-ene-1-carbaldehyde (**8b**) (1.3299 g, 6.9998 mmol). Product **9h** was isolated as a pale yellow solid (1.0691 g, 3.9578 mmol, 85%) following flash chromatography (10:1 hexanes: $\text{Et}_2\text{O}$ ). mp. 75-76  $^\circ\text{C}$ ;  $^1\text{H}$ -NMR (500 MHz,  $\text{CDCl}_3$ ): 10.38

(s, 1H), 6.96 (d, 1H, J = 3.0), 6.90 (dd, 1H, J = 9.0, J = 3.0), 6.83 (d, 1H, J = 9.0), 3.85 (s, 3H), 3.78 (s, 3H), 2.54 (t, 2H, J = 5.8), 2.31 (t, 2H, J = 5.9), 1.66-1.75 (m, 4H);  $^{13}\text{C}$ -NMR (75 MHz,  $\text{CDCl}_3$ ): 193.7, 155.0, 153.3, 142.6, 140.2, 117.8, 116.8, 112.1, 95.1, 90.6, 56.5, 55.9, 32.3, 22.2, 22.0, 21.2; IR (KBr): 2999, 2937, 2834, 2195, 1670, 1499, 1226, 1214; HRMS: m/e for  $\text{C}_{17}\text{H}_{18}\text{O}_3$  calculated 270.1256 (M), found 270.1250.

### **2-[(2,5-Dimethoxyphenyl)ethynyl]cyclohept-1-enecarbaldehyde (9i)**

Compound **7e** (0.3400 g, 2.098 mmol) was subjected to Sonogashira chemistry according to General Procedure A with 2-bromocyclohept-1-ene-1-carbaldehyde (**8c**)<sup>2</sup> (0.6390 g, 3.147 mmol). Product **9i** was isolated as a yellow oil (0.4406 g, 1.551 mmol, 74%) following preparative TLC (10:1 hexanes:Et<sub>2</sub>O).  $^1\text{H}$ -NMR (500 MHz,  $\text{CDCl}_3$ ): 10.34 (s, 1H), 6.94 (d, 1H, J = 3.0), 6.88 (dd, 1H, J = 8.9, J = 3.1), 6.80 (d, 1H, J = 9.1), 3.83 (s, 3H), 3.76 (s, 3H), 2.69-2.72 (m, 2H), 2.52-2.54 (m, 2H), 1.81 (apparent pentet, 2H, J = 5.9), 1.68 (apparent pentet, 2H, J = 5.7), 1.46 (apparent pentet, 2H, J = 6.0);  $^{13}\text{C}$ -NMR (125 MHz,  $\text{CDCl}_3$ ): 193.0, 154.9, 153.2, 148.2, 145.9, 117.6, 116.9, 112.0, 111.9, 96.8, 92.0, 56.4, 55.8, 37.4, 32.3, 25.8, 24.3; IR (KBr): 2999, 2922, 2852, 2188, 1667, 1499, 1221; HRMS: m/e for  $\text{C}_{18}\text{H}_{20}\text{O}_3$  calculated 284.1412 ( $\text{M}^+$ ), found 284.1412.

### **2-[(2,3,4-Trimethoxyphenyl)ethynyl]cyclopent-1-enecarbaldehyde (9j)**

Compound **7f**<sup>7</sup> (0.9223 g, 4.802 mmol) was subjected to Sonogashira coupling with 2-bromocyclopent-1-ene-1-carbaldehyde (**8a**) (1.2606 g, 7.2025 mmol) according to General Procedure A. Flash chromatography (2:1 hexanes:Et<sub>2</sub>O) afforded the product (**9j**) as a pale yellow solid (1.1881 g, 4.1524 mmol, 86%). mp. 74-76 °C;  $^1\text{H}$ -NMR (500 MHz,  $\text{CDCl}_3$ ): 10.19 (s, 1H), 7.17 (d, 1H, J = 9.0), 6.66 (d, 1H, J = 9.0), 3.98 (s, 3H), 3.89 (s, 3H), 3.88 (s, 3H), 2.81 (t, 2H, J = 7.9), 2.66 (t, 2H, J = 7.9), 2.01 (apparent pentet, 2H, J = 7.9);  $^{13}\text{C}$ -NMR (75 MHz,  $\text{CDCl}_3$ ): 189.2, 155.6, 155.3, 147.3, 143.8, 142.4, 128.5, 109.4, 107.6, 97.6, 86.4, 61.5, 61.2, 56.2, 39.0, 29.7, 22.3; IR (KBr): 2942, 2841, 2191, 1668, 1496, 1295; HRMS: m/e for  $\text{C}_{17}\text{H}_{18}\text{O}_4$  calculated 286.1205 ( $\text{M}^+$ ), found 286.1214.

### **2-[(2,3,4-Trimethoxyphenyl)ethynyl]cyclohex-1-enecarbaldehyde (9k)**

Compound **7f** (1.2647 g, 6.5843 mmol) was subjected to Sonogashira conditions with 2-bromocyclohex-1-ene-1-carbaldehyde (**8b**) (1.8764 g, 9.8764 mmol) according to General Procedure A. Coupled product **9k** was isolated via flash chromatography (2:1 hexanes:Et<sub>2</sub>O) for the last purification step. The product was obtained as a yellow solid (1.6237 g, 5.4099 mmol,



82%). mp. 119-120 °C; <sup>1</sup>H-NMR (300 MHz, CDCl<sub>3</sub>): 10.32 (s, 1H), 7.12 (d, 1H, J = 8.7), 6.63 (d, 1H, J = 8.7), 3.95 (s, 3H), 3.86 (s, 3H), 3.85 (s, 3H), 2.51 (m, 2H), 2.28 (m, 2H), 1.62-1.74 (m, 4H); <sup>13</sup>C-NMR (75 MHz, CDCl<sub>3</sub>): 193.3, 155.2, 155.1, 142.3, 142.0, 140.5, 128.2, 109.6, 107.6, 95.3, 89.3, 61.5, 61.2, 56.2, 32.4, 22.2, 22.0, 21.2; IR (KBr): 2937, 2190, 1668, 1494, 1276; HRMS: m/e for C<sub>18</sub>H<sub>20</sub>O<sub>4</sub> calculated 300.1362 (M<sup>+</sup>), found 300.1355.

### **2-[(3,4,5-Trimethoxyphenyl)ethynyl]cyclopent-1-enecarbaldehyde (9l)**

Compound **7g**<sup>8</sup> (0.2514 g, 1.309 mmol) was subjected to General Procedure A with 2-bromocyclopent-1-ene-1-carbaldehyde (**8a**) (0.3436 g, 1.963 mmol). Preparative TLC (2:1 hexanes:Et<sub>2</sub>O) afforded the product as a yellow solid (0.3109 g, 1.087 mmol, 83%). mp. 131-133 °C; <sup>1</sup>H-NMR (500 MHz, CDCl<sub>3</sub>): 10.15 (s, 1H), 6.71 (s, 2H), 3.85 (s, 9H), 2.79 (t, 2H, J = 7.8), 2.64 (t, 2H, J = 7.8), 1.99 (apparent pentet, 2H, J = 7.9); <sup>13</sup>C-NMR (125 MHz, CDCl<sub>3</sub>): 189.0, 153.3, 148.0, 143.3, 139.9, 117.0, 109.2, 101.0, 82.6, 61.1, 56.3, 39.0, 29.7, 22.3; IR (KBr): 2941, 2834, 2192, 1661, 1239; HRMS: m/e for C<sub>17</sub>H<sub>18</sub>O<sub>4</sub> calculated 286.1205 (M<sup>+</sup>), found 286.1206.

### **2-[(3,4,5-Trimethoxyphenyl)ethynyl]cyclohex-1-enecarbaldehyde (9m)**

Compound **7g** (0.3386 g, 1.763 mmol) was subjected to General Procedure A with 2-bromocyclohex-1-ene-1-carbaldehyde (**8b**) (0.5024 g, 2.644 mmol). Preparative TLC (2:1 hexanes:Et<sub>2</sub>O) was used to isolate **9m** as a cream-coloured solid (0.4510 g, 1.503 mmol, 85%). mp. 121-123 °C; <sup>1</sup>H-NMR (500 MHz, CDCl<sub>3</sub>): 10.31 (s, 1H), 6.70 (s, 2H), 3.87 (s, 9H), 2.52 (t, 2H, J = 5.9), 2.31 (t, 2H, J = 5.9), 1.67-1.74 (m, 4H); <sup>13</sup>C-NMR (75 MHz, CDCl<sub>3</sub>): 193.0, 153.3, 142.6, 140.2, 139.6, 117.4, 109.0, 98.8, 85.6, 61.1, 56.3, 32.5, 22.2, 22.0, 21.2; IR (KBr): 2933, 2195, 1664, 1238; HRMS: m/e for C<sub>18</sub>H<sub>20</sub>O<sub>4</sub> calculated 300.1362 (M<sup>+</sup>), found 300.1361.

### **2-[(3,4,5-Trimethoxyphenyl)ethynyl]cyclohept-1-enecarbaldehyde (9n)**

Compound **7g** (0.2422 g, 1.261 mmol) was subjected to General Procedure A with 2-bromocyclohept-1-ene-1-carbaldehyde (**8c**) (0.3841 g, 1.891 mmol). Preparative TLC (2:1 hexanes:Et<sub>2</sub>O) isolated the product as a cream-coloured solid (0.3408 g, 1.085 mmol, 86%). mp. 115-116 °C; <sup>1</sup>H-NMR (500 MHz, CDCl<sub>3</sub>): 10.29 (s, 1H), 6.70 (s, 2H), 3.87 (s, 9H), 2.69-2.71 (m, 2H), 2.53-2.55 (m, 2H), 1.83 (apparent pentet, 2H, J = 5.2), 1.68 (apparent pentet, 2H, J = 5.3), 1.47 (apparent pentet, 2H, J = 5.3); <sup>13</sup>C-NMR (75 MHz, CDCl<sub>3</sub>): 192.4, 153.3, 148.3, 145.9, 139.8, 117.4, 109.0, 100.6, 87.0, 68.1, 61.1, 56.3, 37.6, 32.3, 25.9, 24.4; IR (KBr): 2924, 2850, 2185, 1668, 1575, 1503, 1238; HRMS: m/e for C<sub>19</sub>H<sub>22</sub>O<sub>4</sub> calculated 314.1518 (M<sup>+</sup>), found

314.1526.

### **2-[(3-Isopropyl-4,5-dimethoxyphenyl)ethynyl]cyclohex-1-enecarbaldehyde (9o)**

Compound **7h** (1.3196 g, 6.4650 mmol) was subjected to Sonogashira conditions according to General Procedure A with 2-bromocyclohex-1-ene-1-carbaldehyde (**8b**) (1.8424 g, 9.6975 mmol). Compound **9o** was isolated via flash chromatography (10:1 hexanes:Et<sub>2</sub>O) as a yellow oil (1.7456 g, 5.5918 mmol, 86%). <sup>1</sup>H-NMR (500 MHz, CDCl<sub>3</sub>): 10.31 (s, 1H), 6.97 (d, 1H, J = 1.7), 6.83 (d, 1H, J = 1.7), 3.84 (s, 3H), 3.82 (s, 3H), 3.31 (septet, 1H, J = 7.0), 2.50 (t, 2H, J = 6.1), 2.28 (t, 2H, J = 6.1), 1.63-1.72 (m, 4H), 1.19 (d, 6H, J = 7.1); <sup>13</sup>C-NMR (125 MHz, CDCl<sub>3</sub>): 193.0, 152.4, 147.7, 142.8, 142.2, 140.3, 122.6, 117.6, 112.8, 99.2, 85.2, 61.0, 55.8, 32.4, 26.8, 23.3, 22.1, 21.9, 21.1; IR (KBr): 2936, 2868, 2192, 1673, 1484, 1323, 1226; HRMS: m/e for C<sub>20</sub>H<sub>24</sub>O<sub>3</sub> calculated 312.1725 (M<sup>+</sup>), found 312.1727.

### **2-(Thiophen-3-ylethynyl)cyclohex-1-enecarbaldehyde (9p)**

3-(Trimethylsilylethynyl)thiophene<sup>9</sup> (**7'i**) (0.3651 g, 2.028 mmol) was subjected to General Procedure B with 2-bromocyclohex-1-ene-1-carbaldehyde (**8b**) (0.5779 g, 3.042 mmol). The reaction flask was placed in an oil bath set to 75 °C for the overnight (20 h) portion of the reaction. The product (**9p**) (0.3511 g, 1.625 mmol, 80%) was isolated via preparative TLC (15:1 hexanes:Et<sub>2</sub>O) as a yellow oil. <sup>1</sup>H-NMR (500 MHz, CDCl<sub>3</sub>): 10.29 (s, 1H), 7.53 (d, 1H, J = 2.1), 7.32 (dd, 1H, J = 5.0, J = 3.1), 7.15 (d, 1H, J = 5.4), 2.51 (t, 2H, J = 6.1), 2.31 (t, 2H, J = 6.2), 1.66-1.75 (m, 4H); <sup>13</sup>C-NMR (75 MHz, CDCl<sub>3</sub>): 193.0, 142.6, 140.1, 129.8, 129.7, 125.9, 121.5, 93.8, 86.1, 32.4, 22.2, 22.0, 21.2; IR (KBr): 3320, 3106, 2936, 2861, 2834, 2201, 1668, 1596; HRMS: m/e for C<sub>13</sub>H<sub>12</sub>OS calculated 216.0609 (M<sup>+</sup>), found 216.0616.

### **[2-(Phenylethynyl)cyclohex-1-enyl]methyl acetate (10b)**

Compound **9b** (0.4687 g, 2.231 mmol) was subjected to reduction and acetylation according to General Procedure C. Product **10b** was isolated via preparative TLC (15:1 hexanes:Et<sub>2</sub>O) as a yellow oil (0.4889 g, 1.924 mmol, 86%). <sup>1</sup>H-NMR (500 MHz, CDCl<sub>3</sub>): 7.43-7.45 (m, 2H), 7.29-7.33 (m, 3H), 4.90 (s, 2H), 2.31 (m, 2H), 2.18 (m, 2H), 2.10 (s, 3H), 1.66-1.71 (m, 4H); <sup>13</sup>C-NMR (75 MHz, CDCl<sub>3</sub>): 171.3, 139.1, 131.6, 128.4, 128.2, 123.5, 120.1, 93.2, 88.2, 66.7, 30.3, 27.2, 22.3, 22.1, 21.1; IR (KBr): 3058, 2934, 2861, 1740, 1228; HRMS: m/e for C<sub>17</sub>H<sub>18</sub>O<sub>2</sub> calculated 254.1307 (M<sup>+</sup>), found 254.1302.

### **[2-((3,4-Dimethoxyphenyl)ethynyl)cyclohex-1-enyl]methyl acetate (10d)**

Compound **9d** (1.0838 g, 4.0122 mmol) was subjected to General Procedure C. The product **10d**

was isolated via flash chromatography (5:1 hexanes:Et<sub>2</sub>O), as a pale yellow oil (1.1207 g, 3.5674 mmol, 89%). <sup>1</sup>H-NMR (500 MHz, CDCl<sub>3</sub>): 7.03 (dd, 1H, J = 8.2, J = 1.9), 6.93 (d, 1H, J = 1.9), 6.79 (d, 1H, J = 8.3), 4.89 (s, 2H), 3.88 (s, 6H), 2.29 (m, 2H), 2.16 (m, 2H), 2.08 (s, 3H), 1.63-1.70 (m, 4H); <sup>13</sup>C-NMR (125 MHz, CDCl<sub>3</sub>): 171.2, 149.3, 148.6, 138.4, 124.7, 120.1, 115.7, 114.1, 111.0, 93.2, 86.7, 66.6, 56.0, 55.9, 30.3, 27.0, 22.2, 22.0, 21.0; IR (KBr): 2934, 2837, 1737, 1514, 1247; HRMS: m/e for C<sub>19</sub>H<sub>22</sub>O<sub>4</sub> calculated 314.1518 (M<sup>+</sup>), found 314.1513.

**[2-((3,5-Dimethoxyphenyl)ethynyl)cyclopent-1-enyl]methyl acetate (10e)**

Compound **9e** (1.0474 g, 4.0896 mmol) was subjected to reduction and acetylation according to General Procedure C. Product **10e** was isolated as a yellow oil (1.0852 g, 3.6157 mmol, 88%) following flash chromatography (5:1 hexanes:Et<sub>2</sub>O). <sup>1</sup>H-NMR (300 MHz, CDCl<sub>3</sub>): 6.58 (d, 2H, J = 2.3), 6.41 (t, 1H, J = 2.3), 4.86 (s, 2H), 3.76 (s, 6H), 2.60 (t, 2H, J = 7.5), 2.49 (t, 2H, J = 7.5), 2.07 (s, 3H), 1.93 (apparent pentet, 2H, J = 7.57); <sup>13</sup>C-NMR (75 MHz, CDCl<sub>3</sub>): 170.9, 160.6, 145.0, 124.6, 122.7, 109.2, 101.8, 94.9, 84.2, 61.9, 55.4, 37.0, 34.2, 22.4, 20.8; IR (KBr): 3002, 2842, 2202, 1741, 1595, 1420, 1231; HRMS: m/e for C<sub>18</sub>H<sub>20</sub>O<sub>4</sub> calculated 300.1362 (M<sup>+</sup>), found 300.1357.

**[2-((3,5-Dimethoxyphenyl)ethynyl)cyclohex-1-enyl]methyl acetate (10f)**

Compound **9f** (0.9252 g, 3.425 mmol) was subjected to reduction and acetylation according to General Procedure C. Product **10f** was isolated as a yellow oil (0.9761 g, 3.107 mmol, 91%) following flash chromatography (5:1 hexanes:Et<sub>2</sub>O). <sup>1</sup>H-NMR (500 MHz, CDCl<sub>3</sub>): 6.58 (d, 2H, J = 2.3), 6.42 (t, 1H, J = 2.3), 4.88 (s, 2H), 3.78 (s, 6H), 2.30 (m, 2H), 2.16 (m, 2H), 2.09 (s, 3H), 1.64-1.70 (m, 4H); <sup>13</sup>C-NMR (75 MHz, CDCl<sub>3</sub>): 171.2, 160.6, 139.4, 124.8, 119.9, 109.2, 101.7, 93.2, 87.8, 66.6, 55.5, 30.2, 27.1, 22.2, 22.0, 21.0; IR (KBr): 3001, 2936, 2840, 2201, 1739, 1590, 1420, 1233; HRMS: m/e for C<sub>19</sub>H<sub>22</sub>O<sub>4</sub> calculated 314.1518 (M<sup>+</sup>), found 314.1519.

**[2-((2,5-Dimethoxyphenyl)ethynyl)cyclopent-1-enyl]methyl acetate (10g)**

Compound **9g** (0.8184 g, 3.196 mmol) was subjected to reduction and acetylation according to General Procedure C. Product **10g** was isolated as a colourless solid (0.8595 g, 2.864 mmol, 90%) following flash chromatography (7:1 hexanes:Et<sub>2</sub>O). mp. 63-65 °C; <sup>1</sup>H-NMR (500 MHz, CDCl<sub>3</sub>): 6.95 (d, 1H, J = 2.7), 6.84 (dd, 1H, J = 8.9, J = 2.8), 6.80 (d, 1H, J = 9.0), 4.92 (s, 2H), 3.84 (s, 3H), 3.77 (s, 3H), 2.64 (t, 2H, J = 7.8), 2.51 (t, 2H, J = 8.0), 2.09 (s, 3H), 1.96 (apparent pentet, 2H, J = 7.8); <sup>13</sup>C-NMR (75 MHz, CDCl<sub>3</sub>): 171.3, 154.5, 153.3, 145.0, 123.2, 117.8, 115.8, 113.1, 112.1, 91.2, 88.9, 62.2, 56.5, 55.9, 37.0, 34.2, 22.6, 21.0; IR (KBr): 3002, 2960,

2834, 1746, 1504, 1228; HRMS: m/e for C<sub>18</sub>H<sub>20</sub>O<sub>4</sub> calculated 300.1362 (M<sup>+</sup>), found 300.1340.

**[2-(2,5-Dimethoxyphenyl)ethynyl]cyclohex-1-enyl]methyl acetate (10h)**

Compound **9h** (0.6059 g, 2.243 mmol) was subjected to reduction and acetylation according to General Procedure C. Product **10h** was isolated as a yellow solid (0.6362 g, 2.025 mmol, 90%) following preparative TLC (7:1 hexanes:Et<sub>2</sub>O). mp. 54-56 °C; <sup>1</sup>H-NMR (500 MHz, CDCl<sub>3</sub>): 6.94 (d, 1H, J = 2.9), 6.82 (dd, 1H, J = 9.0, J = 2.9), 6.79 (d, 1H, J = 9.0), 4.95 (s, 2H), 3.84 (s, 3H), 3.77 (s, 3H), 2.33 (m, 2H), 2.17 (m, 2H), 2.09 (s, 3H), 1.64-1.70 (m, 4H); <sup>13</sup>C-NMR (125 MHz, CDCl<sub>3</sub>): 171.2, 154.2, 153.2, 139.1, 120.1, 117.6, 115.5, 113.2, 112.0, 92.4, 89.2, 66.8, 56.4, 55.8, 30.0, 27.0, 22.2, 22.0, 21.0; IR (KBr): 2935, 2835, 1737, 1500, 1234; HRMS: m/e for C<sub>19</sub>H<sub>22</sub>O<sub>4</sub> calculated 314.1518 (M<sup>+</sup>), found 314.1526.

**[2-((2,5-Dimethoxyphenyl)ethynyl)cyclohept-1-enyl]methyl acetate (10i)**

Compound **9i** (0.4406 g, 1.551 mmol) was subjected to reduction and acetylation according to General Procedure C. Product **10i** was isolated as a pale yellow oil (0.4327 g, 1.318 mmol, 85%) following preparative TLC (7:1 hexanes:Et<sub>2</sub>O). <sup>1</sup>H-NMR (500 MHz, CDCl<sub>3</sub>): 6.92 (d, 1H, J = 2.7), 6.80 (dd, 1H, J = 8.5, J = 2.5), 6.77 (d, 1H, J = 9.0), 4.96 (s, 2H), 3.82 (s, 3H), 3.75 (s, 3H), 2.49-2.51 (m, 2H), 2.30-2.32 (m, 2H), 2.08 (s, 3H), 1.78 (apparent pentet, 2H, J = 5.8), 1.61 (apparent pentet, 2H, J = 5.4), 1.52 (apparent pentet, 2H, J = 5.5); <sup>13</sup>C-NMR (125 MHz, CDCl<sub>3</sub>): 171.2, 154.1, 153.2, 145.2, 126.0, 117.4, 115.4, 113.3, 111.8, 94.0, 90.0, 68.1, 56.3, 55.8, 34.7, 32.4, 31.3, 26.2, 26.1, 21.1; IR (KBr): 2919, 2850, 1739, 1498, 1228; HRMS: m/e for C<sub>20</sub>H<sub>24</sub>O<sub>4</sub> calculated 328.1675 (M<sup>+</sup>), found 328.1683.

**[2-((2,3,4-Trimethoxyphenyl)ethynyl)cyclopent-1-enyl]methyl acetate (10j)**

Compound **9j** (1.1881 g, 4.1524 mmol) was treated according to General Procedure C. Flash chromatography (2:1 hexanes:Et<sub>2</sub>O) afforded **10j** as a pale yellow oil (1.2573 g, 3.8083 mmol, 92%). <sup>1</sup>H-NMR (500 MHz, CDCl<sub>3</sub>): 7.10 (d, 1H, J = 8.9), 6.60 (d, 1H, J = 8.9), 4.88 (s, 2H), 3.95 (s, 3H), 3.85 (s, 6H), 2.60 (t, 2H, J = 7.8), 2.49 (t, 2H, J = 7.9), 2.07 (s, 3H), 1.94 (apparent pentet, 2H, J = 7.8); <sup>13</sup>C-NMR (75 MHz, CDCl<sub>3</sub>): 171.1, 154.7, 154.4, 144.1, 143.0, 128.0, 123.5, 110.6, 107.4, 91.0, 87.4, 62.1, 61.3, 61.2, 56.2, 37.0, 34.1, 22.5, 21.0; IR (KBr): 2940, 2841, 2199, 1739, 1490, 1226; HRMS: m/e for C<sub>19</sub>H<sub>22</sub>O<sub>5</sub> calculated 330.1467 (M<sup>+</sup>), found 330.1468.

**[2-((2,3,4-Trimethoxyphenyl)ethynyl)cyclohex-1-enyl]methyl acetate (10k)**

Compound **9k** (0.8787 g, 2.928 mmol) was reacted according to General Procedure C. Product

**10k** was isolated as a yellow oil (0.8956 g, 2.600 mmol, 89%) via flash chromatography (2:1 hexanes:Et<sub>2</sub>O). <sup>1</sup>H-NMR (500 MHz, CDCl<sub>3</sub>): 7.10 (d, 1H, J = 8.8), 6.61 (d, 1H, J = 8.9), 4.93 (s, 2H), 3.96 (s, 3H), 3.87 (s, 6H), 2.32 (m, 2H), 2.17 (m, 2H), 2.09 (s, 3H), 1.65-1.70 (m, 4H); <sup>13</sup>C-NMR (75 MHz, CDCl<sub>3</sub>): 171.3, 154.7, 154.3, 142.3, 138.4, 127.9, 120.4, 110.8, 107.4, 91.0, 89.2, 66.8, 61.3, 61.2, 56.2, 30.3, 27.1, 22.3, 22.1, 21.1; IR (KBr): 2940, 2839, 2196, 1746, 1494, 1234; HRMS: m/e for C<sub>20</sub>H<sub>24</sub>O<sub>5</sub> calculated 344.0624 (M<sup>+</sup>), found 344.0627.

**1-[2-((2,3,4-Trimethoxyphenyl)ethynyl)cyclohex-1-enyl]ethyl acetate (10kk)**

Compound **9k** (0.7450 g, 2.482 mmol) was subjected to General Procedure C, where DIBAL-H was substituted with MeLi (1.6 M in Et<sub>2</sub>O, 3.1 mL, 5.0 mmol). The product (**10kk**) was isolated as a yellow/orange oil (0.7888 g, 2.202 mmol, 89%) following flash chromatography (2:1 hexanes:Et<sub>2</sub>O). <sup>1</sup>H-NMR (500 MHz, CDCl<sub>3</sub>): 7.12 (d, 1H, J = 8.6), 6.60 (d, 1H, J = 8.7), 6.13 (q, 1H, J = 6.5), 3.98 (s, 3H), 3.86 (s, 3H), 3.85 (s, 3H), 2.27 (m, 2H), 2.15 (m, 2H), 2.04 (s, 3H), 1.62-1.69 (m, 4H), 1.36 (d, 3H, J = 6.6); <sup>13</sup>C-NMR (75 MHz, CDCl<sub>3</sub>): 170.2, 154.6, 154.2, 143.2, 142.3, 128.0, 117.0, 111.0, 107.4, 91.0, 89.7, 72.7, 61.4, 61.2, 56.2, 30.1, 23.4, 22.4, 22.1, 21.4, 18.8; IR (KBr): 2935, 2839, 2194, 1737, 1593, 1494, 1243; HRMS: m/e for C<sub>21</sub>H<sub>26</sub>O<sub>5</sub> calculated 358.1780 (M<sup>+</sup>), found 358.1777.

**[2-((3,4,5-Trimethoxyphenyl)ethynyl)cyclopent-1-enyl]methyl acetate (10l)**

Compound **9l** (0.3099 g, 1.083 mmol) was subjected to General Procedure C. The product compound (**10l**) was isolated as a yellow oil (0.3093 g, 0.9368 mmol, 89%) via preparative TLC (2:1 hexanes:Et<sub>2</sub>O). <sup>1</sup>H-NMR (500 MHz, CDCl<sub>3</sub>): 6.64 (s, 2H), 4.84 (s, 2H), 3.82 (s, 6H), 3.81 (s, 3H), 2.58 (t, 2H, J = 7.7), 2.47 (t, 2H, J = 7.8), 2.05 (s, 3H), 1.92 (apparent pentet, 2H, J = 7.7); <sup>13</sup>C-NMR (75 MHz, CDCl<sub>3</sub>): 171.0, 153.1, 144.7, 138.8, 122.8, 118.8, 108.0, 95.0, 83.8, 62.0, 61.0, 56.2, 37.1, 34.2, 22.4, 20.9; IR (KBr): 2940, 1741, 1503, 1234; HRMS: m/e for C<sub>19</sub>H<sub>22</sub>O<sub>5</sub> calculated 330.1467 (M<sup>+</sup>), found 330.1464.

**[2-((3,4,5-Trimethoxyphenyl)ethynyl)cyclohex-1-enyl]methyl acetate (10m)**

Compound **9m** (0.1994 g, 0.6644 mmol) was subjected to General Procedure C. The product compound (**10m**) was isolated as a yellow oil (0.2003 g, 0.5820 mmol, 88%) using preparative TLC (2:1 hexanes:Et<sub>2</sub>O). <sup>1</sup>H-NMR (500 MHz, CDCl<sub>3</sub>): 6.66 (s, 2H), 4.89 (s, 2H), 3.85 (s, 6H), 3.84 (s, 3H), 2.30 (m, 2H), 2.17 (m, 2H), 2.09 (s, 3H), 1.64-1.70 (m, 4H); <sup>13</sup>C-NMR (75 MHz, CDCl<sub>3</sub>): 171.2, 153.2, 139.2, 138.8, 120.0, 118.6, 108.8, 93.3, 87.3, 66.7, 61.1, 56.3, 30.3, 27.2, 22.3, 22.1, 21.1; IR (KBr): 2938, 1737, 1576, 1504, 1237; HRMS: m/e for C<sub>20</sub>H<sub>24</sub>O<sub>5</sub> calculated

344.1624 ( $M^+$ ), found 344.1631.

**Phenyl[2-((3,4,5-trimethoxyphenyl)ethynyl)cyclohex-1-enyl]methyl acetate (10mm)**

Compound **9m** (0.2516 g, 0.8383 mmol) was subjected to General Procedure C, where DIBAL-H was substituted with PhMgBr (1.0 M in THF, 1.7mL, 1.7 mmol). The product **10mm** was isolated as a yellow oil (0.2826 g, 0.6725 mmol, 80%) following preparative TLC (2:1 hexanes:Et<sub>2</sub>O). <sup>1</sup>H-NMR (500 MHz, CDCl<sub>3</sub>): 7.43 (apparent d, 2H, J = 7.2), 7.37 (apparent t, 2H, J = 7.6), 7.29-7.32 (m, 1H), 7.27 (s, 1H), 6.77 (s, 2H), 3.90 (s, 6H), 3.89 (s, 3H), 2.33-2.41 (m, 2H), 2.22 (s, 3H), 1.92-1.98 (m, 2H), 1.55-1.73 (m, 4H); <sup>13</sup>C-NMR (75 MHz, CDCl<sub>3</sub>): 169.8, 153.2, 142.6, 139.5, 138.8, 128.4, 127.5, 125.7, 119.1, 118.7, 108.8, 93.5, 88.2, 76.3, 61.1, 56.3, 30.2, 23.8, 22.2, 22.0, 21.3; IR (KBr): 3062, 3004, 2939, 2839, 2197, 1731, 1574, 1505, 1411, 1234; HRMS: m/e for C<sub>26</sub>H<sub>28</sub>O<sub>5</sub> calculated 420.1937 ( $M^+$ ), found 420.1950.

**[2-((3,4,5-Trimethoxyphenyl)ethynyl)cyclohept-1-enyl]methyl acetate (10n)**

Compound **9n** (0.3408 g, 1.085 mmol) was subjected to General Procedure C. The product compound (**10n**) was isolated as a yellow oil (0.3498 g, 0.9766 mmol, 90%) via preparative TLC (2:1 hexanes:Et<sub>2</sub>O). <sup>1</sup>H-NMR (500 MHz, CDCl<sub>3</sub>): 6.66 (s, 2H), 4.90 (s, 2H), 3.86 (s, 6H), 3.85 (s, 3H), 2.48-2.50 (m, 2H), 2.31-2.33 (m, 2H), 2.10 (s, 3H), 1.79 (apparent pentet, 2H, J = 5.8), 1.61 (apparent pentet, 2H, J = 5.4), 1.53 (apparent pentet, 2H, J = 5.5); <sup>13</sup>C-NMR (75 MHz, CDCl<sub>3</sub>): 171.3, 153.4, 145.1, 138.8, 125.9, 118.7, 108.7, 94.0, 88.8, 68.0, 61.1, 56.3, 34.9, 32.4, 31.4, 26.3, 26.1, 21.1; IR (KBr): 2959, 2929, 2858, 1730, 1576, 1464, 1275; HRMS: m/e for C<sub>21</sub>H<sub>26</sub>O<sub>5</sub> calculated 358.1780 ( $M^+$ ), found 358.1776.

**[2-((3-Isopropyl-4,5-dimethoxyphenyl)ethynyl)cyclohex-1-enyl]methyl acetate (10o)**

Compound **9o** (1.7456 g, 5.5918 mmol) was subjected to General Procedure C. Product **10o** was purified via flash chromatography (5:1 hexanes:Et<sub>2</sub>O) as a pale yellow oil (1.7960 g, 5.0421 mmol, 90%). <sup>1</sup>H-NMR (500 MHz, CDCl<sub>3</sub>): 6.93 (d, 1H, J = 1.5), 6.82 (d, 1H, J = 1.5), 4.89 (s, 2H), 3.84 (s, 3H), 3.81 (s, 3H), 3.30 (septet, 1H, J = 7.0), 2.30 (m, 2H), 2.16 (s, 3H), 2.08 (m, 2H), 1.64-1.70 (m, 4H), 1.20 (d, 6H, J = 7.0); <sup>13</sup>C-NMR (125 MHz, CDCl<sub>3</sub>): 171.2, 152.3, 146.8, 142.5, 138.6, 122.1, 120.0, 118.8, 112.7, 93.4, 86.9, 66.6, 61.0, 55.8, 30.3, 27.0, 26.8, 23.4, 22.2, 22.0, 21.0; IR (KBr): 2935, 2869, 2836, 2198, 1739, 1573, 1484, 1341, 1273; HR m/e for C<sub>22</sub>H<sub>28</sub>O<sub>4</sub> calculated 356.1988 ( $M^+$ ), found 356.1990.

**[2-(Thiophen-3-ylethynyl)cyclohex-1-enyl]methyl acetate (10p)**

Compound **9p** (0.3511 g, 1.625 mmol) was subjected to reduction and acetylation according to

General Procedure C. The product (**10p**) was isolated as a yellow oil (0.3957 g, 1.521 mmol, 94%) via preparative TLC (10:1 hexanes:Et<sub>2</sub>O). <sup>1</sup>H-NMR (500 MHz, CDCl<sub>3</sub>): 7.42 (d, 1H, J = 2.2), 7.27 (dd, 1H, J = 4.8, J = 2.9), 7.11 (d, 1H, J = 5.0), 4.88 (s, 2H), 2.30 (m, 2H), 2.17 (m, 2H), 2.10 (s, 3H), 1.65-1.68 (m, 4H); <sup>13</sup>C-NMR (75 MHz, CDCl<sub>3</sub>): 171.3, 139.0, 129.9, 128.3, 125.4, 122.5, 120.0, 88.2, 87.7, 66.7, 30.2, 27.1, 22.2, 22.1, 21.1; IR (KBr): 3108, 2934, 2860, 2205, 1738, 1233; HR-MS: m/e for C<sub>15</sub>H<sub>16</sub>O<sub>2</sub>S calculated 260.0871 (M<sup>+</sup>), found 260.0876.

**Hexacarbonyl[μ-η<sup>4</sup>(2-(phenylethynyl)cyclohex-1-enyl)methyl acetate)]dicobalt (**1b**)**

Compound **10b** (0.4889 g, 1.924 mmol) was subjected to complexation procedures according to General Procedure D. Product **1b** was isolated as a dark brown solid (0.9272 g, 1.717 mmol, 89%) following flash chromatography (15:1 hexanes:Et<sub>2</sub>O). <sup>1</sup>H-NMR (500 MHz, CDCl<sub>3</sub>): 7.41 (apparent d, 2H, J = 7.1), 7.30-7.36 (m, 3H), 4.53 (s, 2H), 2.40 (t, 2H, J = 6.1), 2.14 (t, 2H, J = 6.2), 1.95 (s, 3H), 1.72-1.80 (m, 4H); <sup>13</sup>C-NMR (75 MHz, CDCl<sub>3</sub>): 199.6, 170.8, 138.7, 133.4, 132.1, 129.3, 128.8, 127.8, 93.7, 91.7, 65.3, 33.3, 28.5, 23.4, 22.2, 20.9; IR (KBr): 2935, 2861, 2088, 2047, 2016, 1743, 1233; HRMS: m/e for C<sub>23</sub>H<sub>18</sub>Co<sub>2</sub>O<sub>8</sub> calculated 483.9767 (M-2CO<sup>+</sup>), found 483.9759.

**Hexacarbonyl[μ-η<sup>4</sup>(2-((3,4-dimethoxyphenyl)ethynyl)cyclohex-1-enyl)methyl acetate)]dicobalt (**1d**)**

Compound **10d** (1.1207 g, 3.5674 mmol) was complexed according to General Procedure D. After washing the column of silica with 100% hexanes to remove excess, uncomplexed Co<sub>2</sub>(CO)<sub>8</sub>, the product **1d** was eluted using 5:1 hexanes:Et<sub>2</sub>O, and isolated as a dark brown solid (2.0001 g, 3.3336 mmol, 93%). <sup>1</sup>H-NMR (500 MHz, CDCl<sub>3</sub>): 7.04 (dd, 1H, J = 8.3, J = 2.0), 6.92 (d, 1H, J = 2.0), 6.84 (d, 1H, J = 8.4), 4.61 (s, 2H), 3.92 (s, 3H), 3.89 (s, 3H), 2.40 (t, 2H, J = 6.2), 2.14 (t, 2H, J = 6.0), 1.98 (s, 3H), 1.72-1.81 (m, 4H); <sup>13</sup>C-NMR (75 MHz, CDCl<sub>3</sub>): 199.6, 170.8, 149.0, 148.9, 133.4, 132.0, 130.7, 122.1, 112.5, 111.4, 94.0, 91.4, 65.3, 56.0, 55.9, 33.4, 28.3, 23.4, 22.2, 20.7; IR (KBr): 2935, 2834, 2086, 2045, 2014, 1742, 1509, 1228; HRMS: m/e for C<sub>25</sub>H<sub>22</sub>Co<sub>2</sub>O<sub>10</sub> calculated 571.9928 (M-CO<sup>+</sup>), found 571.9925.

**Hexacarbonyl[μ-η<sup>4</sup>(2-((3,5-dimethoxyphenyl)ethynyl)cyclohex-1-enyl)methyl acetate)]dicobalt (**1f**)**

Compound **10f** (0.9761 g, 3.107 mmol) was subjected to complexation according to General Procedure D. The complexed compound (**1f**) was isolated via flash chromatography (5:1 hexanes:Et<sub>2</sub>O) following removal of excess, uncomplexed Co<sub>2</sub>(CO)<sub>8</sub> with 100% hexanes. The

product was isolated as a dark brown solid (1.7135 g, 2.8559 mmol, 92%).  $^1\text{H-NMR}$  (500 MHz,  $\text{CDCl}_3$ ): 6.57 (d, 2H,  $J = 2.2$ ), 6.41 (t, 1H,  $J = 2.2$ ), 4.58 (s, 2H), 3.81 (s, 6H), 2.39 (t, 2H,  $J = 5.9$ ), 2.13 (t, 2H,  $J = 5.9$ ), 1.98 (s, 3H), 1.70-1.80 (m, 4H);  $^{13}\text{C-NMR}$  (75 MHz,  $\text{CDCl}_3$ ): 199.7, 170.8, 160.8, 140.8, 133.6, 131.9, 107.8, 99.6, 93.8, 91.6, 65.2, 55.4, 33.3, 28.5, 23.4, 22.2, 20.7; IR (KBr): 2937, 2836, 2089, 2012, 1740, 1590, 1421, 1234; HRMS:  $m/e$  for  $\text{C}_{25}\text{H}_{22}\text{Co}_2\text{O}_{10}$  calculated 543.9979 ( $\text{M}-2\text{CO}^+$ ), found 543.9975.

**Hexacarbonyl[ $\mu-\eta^4(2-((2,5\text{-dimethoxyphenyl})\text{ethynyl})\text{cyclopent-1-enyl})\text{methyl acetate}]$ dicobalt (**1g**)**

Compound **10g** (0.8595 g, 2.864 mmol) was subjected to complexation according to General Procedure D. The complexed compound **1g** was isolated using flash chromatography (7:1 hexanes: $\text{Et}_2\text{O}$ ) following removal of excess, uncomplexed  $\text{Co}_2(\text{CO})_8$  with 100% hexanes. The product was isolated as a dark brown solid (1.5256 g, 2.6035 mmol, 91%).  $^1\text{H-NMR}$  (500 MHz,  $\text{CDCl}_3$ ): 7.05 (d, 1H,  $J = 3.0$ ), 6.87 (dd, 1H,  $J = 8.8$ ,  $J = 3.1$ ), 6.77 (d, 1H,  $J = 9.0$ ), 4.59 (s, 2H), 3.80 (s, 3H), 3.74 (s, 3H), 2.76 (t, 2H,  $J = 7.8$ ), 2.54 (t, 2H,  $J = 7.8$ ), 2.0 (apparent pentet, 2H,  $J = 7.9$ ), 1.98 (s, 3H);  $^{13}\text{C-NMR}$  (75 MHz,  $\text{CDCl}_3$ ): 199.8, 170.9, 153.6, 150.6, 137.7, 137.0, 127.3, 117.3, 113.7, 110.5, 89.0, 88.0, 61.2, 55.8, 54.6, 39.8, 36.2, 22.1, 20.8; IR (KBr): 2959, 2835, 2087, 2047, 2014, 1746, 1494, 1223; HRMS:  $m/e$  for  $\text{C}_{24}\text{H}_{20}\text{Co}_2\text{O}_{10}$  calculated 529.9822 ( $\text{M}-2\text{CO}^+$ ), found 529.9818.

**Hexacarbonyl[ $\mu-\eta^4(2-((2,5\text{-dimethoxyphenyl})\text{ethynyl})\text{cyclohex-1-enyl})\text{methyl acetate}]$ dicobalt (**1h**)**

Compound **10h** (0.6362 g, 2.025 mmol) was subjected to complexation according to General Procedure D. The complexed compound (**1h**) was eluted via flash chromatography (7:1 hexanes: $\text{Et}_2\text{O}$ ) following removal of excess, uncomplexed  $\text{Co}_2(\text{CO})_8$  with 100% hexanes. The product was isolated as a dark brown solid (1.0050 g, 1.6750 mmol, 83%).  $^1\text{H-NMR}$  (500 MHz,  $\text{CDCl}_3$ ): 7.03 (d, 1H,  $J = 2.9$ ), 6.85 (dd, 1H,  $J = 8.8$ ,  $J = 3.0$ ), 6.74 (d, 1H,  $J = 8.9$ ), 4.50 (s, 2H), 3.80 (s, 3H), 3.72 (s, 3H), 2.37 (m, 2H), 2.11 (m, 2H), 1.95 (s, 3H), 1.70-1.75 (m, 4H);  $^{13}\text{C-NMR}$  (75 MHz,  $\text{CDCl}_3$ ): 199.9, 171.0, 153.6, 150.3, 133.2, 132.5, 127.7, 117.4, 113.6, 110.4, 95.0, 89.9, 65.1, 55.8, 54.6, 33.1, 28.3, 23.5, 22.4, 20.9; IR (KBr): 2938, 2834, 2086, 2049, 2016, 1740, 1490, 1228; HR-MS:  $m/e$  for  $\text{C}_{25}\text{H}_{22}\text{Co}_2\text{O}_{10}$  calculated 543.9979 ( $\text{M}-2\text{CO}^+$ ), found 543.9979.

**Hexacarbonyl[ $\mu-\eta^4(2-((2,5\text{-dimethoxyphenyl})\text{ethynyl})\text{cyclohept-1-enyl})\text{methyl}$**



**acetate)]dicobalt (1i)**

Compound **10i** (0.4327 g, 1.318 mmol) was subjected to complexation according to General Procedure D. The complexed compound (**1i**) was isolated via flash chromatography (5:1 hexanes:Et<sub>2</sub>O) following removal of excess, uncomplexed Co<sub>2</sub>(CO)<sub>8</sub> with 100% hexanes. The product was isolated as a dark brown-green solid (0.6867 g, 1.118 mmol, 85%). <sup>1</sup>H-NMR (500 MHz, CDCl<sub>3</sub>): 7.01 (d, 1H, J = 3.0), 6.86 (dd, 1H, J = 8.9, J = 3.1), 6.75 (d, 1H, J = 8.9), 4.52 (s, 2H), 3.81 (s, 3H), 3.74 (s, 3H), 2.60-2.62 (m, 2H), 2.30-2.32 (m, 2H), 1.95 (s, 3H), 1.82 (apparent pentet, 2H, J = 5.8), 1.54-1.63 (m, 4H); <sup>13</sup>C-NMR (75 MHz, CDCl<sub>3</sub>): 199.9, 171.0, 153.6, 150.2, 139.2, 138.8, 127.8, 117.3, 113.6, 110.3, 96.0, 91.1, 65.7, 55.8, 54.6, 37.6, 32.7, 32.5, 26.7, 26.4, 21.0; IR (KBr): 2926, 2852, 2085, 2058, 2013, 1742, 1486, 1222; HRMS: m/e for C<sub>26</sub>H<sub>24</sub>Co<sub>2</sub>O<sub>10</sub> calculated 558.0106 (M-2CO<sup>+</sup>), found 558.0117.

**Hexacarbonyl[μ-η<sup>4</sup>(2-((2,3,4-trimethoxyphenyl)ethynyl)cyclopent-1-enyl)methyl acetate)]dicobalt (1j)**

Compound **10j** (1.0012 g, 3.0326 mmol) was subjected to complexation according to General Procedure D. After washing excess, uncomplexed Co<sub>2</sub>(CO)<sub>8</sub> off a column of silica, the product (**1j**) was eluted using 2:1 hexanes:Et<sub>2</sub>O as a dark brown solid (1.6176 g, 2.6260 mmol, 87%). <sup>1</sup>H-NMR (500 MHz, CDCl<sub>3</sub>): 7.16 (d, 1H, J = 8.8), 6.64 (d, 1H, J = 8.9), 4.65 (s, 2H), 3.96 (s, 3H), 3.90 (s, 3H), 3.85 (s, 3H), 2.76 (t, 2H, J = 7.8), 2.56 (t, 2H, J = 7.8), 2.00 (apparent pentet, 2H, J = 7.8), 1.99 (s, 3H); <sup>13</sup>C-NMR (75 MHz, CDCl<sub>3</sub>): 199.9, 171.0, 154.4, 151.0, 141.1, 138.0, 136.5, 126.6, 122.9, 106.6, 89.7, 87.5, 61.3, 60.9, 60.2, 56.1, 40.2, 36.2, 22.1, 20.8; IR (KBr): 2944, 2844, 2086, 2045, 2014, 1742, 1486, 1231; HRMS: m/e for C<sub>25</sub>H<sub>22</sub>Co<sub>2</sub>O<sub>11</sub> calculated 448.0131 (M-6CO<sup>+</sup>), found 448.0139.

**Hexacarbonyl[μ-η<sup>4</sup>(2-((2,3,4-trimethoxyphenyl)ethynyl)cyclohex-1-enyl)methyl acetate)]dicobalt (1k)**

Compound **10k** (0.8956 g, 2.600 mmol) was subjected to complexation according to General Procedure D. The complexed product (**1k**) was isolated as a dark green solid (1.5445 g, 2.4516 mmol, 94%) following flash chromatography (2:1 hexanes:Et<sub>2</sub>O). <sup>1</sup>H-NMR (500 MHz, CDCl<sub>3</sub>): 7.14 (d, 1H, J = 9.0), 6.64 (d, 1H, J = 9.0), 4.53 (s, 2H), 3.95 (s, 3H), 3.90 (s, 3H), 3.84 (s, 3H), 2.39 (t, 2H, J = 6.0), 2.13 (t, 2H, J = 6.1), 1.94 (s, 3H), 1.71-1.77 (m, 4H); <sup>13</sup>C-NMR (75 MHz, CDCl<sub>3</sub>): 200.1, 170.9, 154.4, 150.5, 140.8, 132.8, 132.4, 126.6, 123.0, 106.4, 94.4, 90.3, 65.3, 60.9, 60.0, 56.0, 33.3, 28.3, 23.5, 22.4, 20.8; IR (KBr): 2940, 2838, 2084, 2044, 2012, 1742,

1486, 1229; HRMS: m/e for C<sub>26</sub>H<sub>24</sub>Co<sub>2</sub>O<sub>11</sub> calculated 462.0288 (M-6CO<sup>+</sup>), found 462.0298.

**Hexacarbonyl[μ-η<sup>4</sup>-(1-[2-((2,3,4-trimethoxyphenyl)ethynyl)cyclohex-1-enyl]ethyl acetate)]dicobalt **1kk****

Compound **10kk** (0.7888 g, 2.202 mmol) was subjected to complexation according to General Procedure D. Compound **1kk** (1.2896 g, 2.0024 mmol, 91%) was isolated as a dark green solid following flash chromatography (2:1 hexanes:Et<sub>2</sub>O). <sup>1</sup>H-NMR (500 MHz, CDCl<sub>3</sub>): 7.11 (d, 1H, J = 8.7), 6.64 (d, 1H, J = 8.7), 6.14 (q, 1H, J = 6.3), 3.96 (s, 3H), 3.90 (s, 3H), 3.83 (s, 3H), 2.15-2.33 (m, 4H), 1.93 (s, 3H), 1.60-1.75 (m, 4H), 1.26 (d, 3H, J = 6.3); <sup>13</sup>C-NMR (75 MHz, CDCl<sub>3</sub>): 200.1, 170.0, 154.2, 150.2, 140.9, 137.4, 130.2, 126.6, 123.6, 106.3, 93.2, 92.8, 70.6, 60.9, 60.0, 56.0, 33.0, 24.5, 23.6, 22.4, 21.3, 18.3; IR (KBr): 2938, 2839, 2084, 2046, 2016, 1737, 1485, 1241; HRMS: m/e for C<sub>27</sub>H<sub>26</sub>Co<sub>2</sub>O<sub>11</sub> calculated 588.0241 (M-2CO<sup>+</sup>), found 588.0226.

**Hexacarbonyl[μ-η<sup>4</sup>-(2-((3,4,5-trimethoxyphenyl)ethynyl)cyclopent-1-enyl)methyl acetate)]dicobalt (**1l**)**

Compound **10l** (0.3093 g, 0.9368 mmol) was complexed using General Procedure D to afford product **1l** (0.5156 g, 0.8370 mmol, 89%) as a dark brown solid following flash chromatography (1:1 hexanes:Et<sub>2</sub>O). <sup>1</sup>H-NMR (500 MHz, CDCl<sub>3</sub>): 6.71 (s, 2H), 4.72 (s, 2H), 3.90 (s, 3H), 3.88 (s, 6H), 2.81 (t, 2H, J = 7.8), 2.56 (t, 2H, J = 7.9), 2.04 (apparent pentet, 2H, J = 7.8), 2.02 (s, 3H); <sup>13</sup>C-NMR (75 MHz, CDCl<sub>3</sub>): 199.5, 170.7, 153.3, 138.0, 137.7, 136.9, 133.7, 106.5, 93.4, 84.4, 61.2, 61.0, 56.2, 39.9, 36.2, 21.8, 20.7; IR (KBr): 2940, 2088, 2050, 2020, 1743, 1576, 1230; HRMS: m/e for C<sub>25</sub>H<sub>22</sub>Co<sub>2</sub>O<sub>11</sub> calculated 559.9928 (M-2CO<sup>+</sup>), found 559.9924.

**Hexacarbonyl[μ-η<sup>4</sup>-(2-((3,4,5-trimethoxyphenyl)ethynyl)cyclohex-1-enyl)methyl acetate)]dicobalt (**1m**)**

Compound **10m** (0.2003 g, 0.5820 mmol) was complexed using General Procedure D to afford product **1m** (0.3162 g, 0.5019 mmol, 86%) as a dark brown solid following flash chromatography (1:1 hexanes:Et<sub>2</sub>O). <sup>1</sup>H-NMR (500 MHz, CDCl<sub>3</sub>): 6.65 (s, 2H), 4.62 (s, 2H), 3.89 (s, 3H), 3.87 (s, 6H), 2.39 (t, 2H, J = 6.1), 2.13 (t, 2H, J = 6.1), 1.98 (s, 3H), 1.72-1.81 (m, 4H); <sup>13</sup>C-NMR (75 MHz, CDCl<sub>3</sub>): 199.4, 170.8, 153.2, 137.9, 134.0, 133.6, 131.8, 106.7, 94.1, 91.5, 65.3, 61.0, 56.2, 33.4, 28.3, 23.4, 22.2, 20.8; IR (KBr): 2938, 2087, 2048, 2020, 1742, 1232; HRMS: m/e for C<sub>26</sub>H<sub>24</sub>Co<sub>2</sub>O<sub>11</sub> calculated 574.0084 (M-2CO<sup>+</sup>), found 574.0071.

**Hexacarbonyl[μ-η<sup>4</sup>-(phenyl[2-((3,4,5-trimethoxyphenyl)ethynyl)cyclohex-1-enyl]methyl acetate)] dicobalt (**1mm**)**

Compound **10mm** (0.2826 g, 0.6725 mmol) was complexed using General Procedure D to afford product **1mm** (0.4118 g, 0.5833 mmol, 87%) as a dark brown solid following flash chromatography (1:1 hexanes:Et<sub>2</sub>O). <sup>1</sup>H-NMR (500 MHz, CDCl<sub>3</sub>): 7.18-7.20 (m, 3H), 6.94 (s, 1H), 6.87-6.89 (m, 2H), 6.36 (s, 2H), 3.85 (s, 3H), 3.70 (s, 6H), 2.48-2.50 (m, 2H), 2.09 (s, 3H), 2.00-2.05 (m, 2H), 1.60-1.88 (m, 4H); <sup>13</sup>C-NMR (75 MHz, CDCl<sub>3</sub>): 199.7, 169.8, 152.4, 137.9, 137.0, 136.3, 135.0, 131.3, 128.2, 127.6, 126.7, 107.2, 98.0, 92.1, 75.2, 60.9, 55.8, 33.0, 26.1, 23.4, 22.4, 21.1; IR (KBr): 3001, 2938, 2860, 2835, 2091, 2047, 2034, 1738, 1578, 1407, 1235; HRMS: m/e for C<sub>32</sub>H<sub>28</sub>Co<sub>2</sub>O<sub>11</sub> calculated 538.0601 (M-6CO<sup>+</sup>), found 538.0601.

**Hexacarbonyl[μ-η<sup>4</sup>-(2-((3,4,5-trimethoxyphenyl)ethynyl)cyclohept-1-enyl)methyl acetate)]dicobalt (1n)**

Compound **10n** (0.3498 g, 0.9766 mmol) was complexed using General Procedure D to afford product **1n** (0.5788 g, 0.8987 mmol, 92%) as a dark green solid following flash chromatography (1:1 hexanes:Et<sub>2</sub>O). <sup>1</sup>H-NMR (500 MHz, CDCl<sub>3</sub>): 6.64 (s, 2H), 4.69 (s, 2H), 3.89 (s, 3H), 3.86 (s, 6H), 2.62-2.64 (m, 2H), 2.33-2.35 (m, 2H), 1.99 (s, 3H), 1.83 (apparent pentet, 2H, J = 6.0), 1.62 (apparent pentet, 2H, J = 5.4), 1.55 (apparent pentet, 2H, J = 5.42); <sup>13</sup>C-NMR (75 MHz, CDCl<sub>3</sub>): 199.4, 170.9, 153.2, 139.5, 138.9, 137.9, 134.2, 106.6, 95.8, 91.8, 65.7, 61.0, 56.2, 37.5, 32.9, 32.3, 27.1, 26.2, 20.7; IR (KBr): 2928, 2853, 2087, 2049, 1742, 1577, 1501, 1408, 1231; HRMS: m/e for C<sub>27</sub>H<sub>26</sub>Co<sub>2</sub>O<sub>11</sub> calculated 588.0241 (M-2CO<sup>+</sup>), found 588.0234.

**Hexacarbonyl[μ-η<sup>4</sup>-(2-((3-isopropyl-4,5-dimethoxyphenyl)ethynyl)cyclohex-1-enyl)methyl acetate)] dicobalt (1o)**

Compound **10o** (1.7960 g, 5.0421 mmol) was complexed according to General Procedure D. After washing the column of silica with 100% hexanes to remove excess, uncomplexed Co<sub>2</sub>(CO)<sub>8</sub>, the product (**1o**) was eluted using 5:1 hexanes:Et<sub>2</sub>O, and isolated as a dark brown solid (2.8905 g, 4.5021 mmol, 89%). <sup>1</sup>H-NMR (500 MHz, CDCl<sub>3</sub>): 6.92 (d, 1H, J = 1.8), 6.80 (d, 1H, J = 1.8), 4.66 (s, 2H), 3.86 (s, 3H), 3.86 (s, 3H), 3.34 (septet, 1H, J = 7.1), 2.40 (t, 2H, J = 6.0), 2.13 (t, 2H, J = 6.2), 1.98 (s, 3H), 1.70-1.80 (m, 4H), 1.22 (d, 6H, J = 7.1); <sup>13</sup>C-NMR (75 MHz, CDCl<sub>3</sub>): 199.7, 170.8, 152.5, 146.1, 142.7, 133.8, 133.5, 131.8, 119.9, 110.8, 94.5, 91.3, 65.2, 61.0, 55.8, 33.4, 28.3, 26.9, 23.5, 23.4, 22.2, 20.8; IR (KBr): 2962, 2936, 2869, 2834, 2086, 2048, 2019, 1743, 1464, 1308, 1230; HRMS: m/e for C<sub>28</sub>H<sub>28</sub>Co<sub>2</sub>O<sub>10</sub> calculated 558.0499 (M-3CO<sup>+</sup>), found 558.0486.

**[2-(Thiophen-3-ylethynyl)cyclohex-1-enyl]methyl acetate dicobalt hexacarbonyl (1p)**

Compound **10p** (0.3957 g, 1.521 mmol) was subjected to complexation procedures according to General Procedure D. The product (**1p**) was isolated as a dark brown solid (0.7527 g, 1.379 mmol, 91%) via flash chromatography (10:1 hexanes:Et<sub>2</sub>O). <sup>1</sup>H-NMR (500 MHz, CDCl<sub>3</sub>): 7.32-7.34 (m, 2H), 7.06 (dd, 1H, J = 4.6, J = 1.7), 4.57 (s, 2H), 2.38 (t, 2H, J = 6.0), 2.14 (t, 2H, J = 6.1), 1.99 (s, 3H), 1.69-1.80 (m, 4H); <sup>13</sup>C-NMR (75 MHz, CDCl<sub>3</sub>): 199.5, 170.8, 139.1, 133.6, 132.0, 128.5, 126.4, 123.7, 91.2, 87.3, 65.3, 33.2, 28.6, 23.3, 22.2, 20.9; IR (KBr): 2936, 2862, 2088, 2049, 2020, 1742, 1231; HRMS: m/e for C<sub>21</sub>H<sub>16</sub>Co<sub>2</sub>O<sub>8</sub>S calculated 461.9382 (M-3CO<sup>+</sup>), found 461.9398.

**Hexacarbonyl[μ-η<sup>4</sup>-((10,11-η:10,11-η)-2,3,4,5-tetrahydro-7,8-dimethoxy-1H-dibenzo[*a,d*]cycloheptene)] dicobalt (**2d**) and Hexacarbonyl[μ-η<sup>4</sup>-((10,11-η:10,11-η)-2,3,4,5-tetrahydro-6,7-dimethoxy-1H-dibenzo[*a,d*]cycloheptene)] dicobalt (**2d'**)**

Compound **1d** (1.0023 g, 1.6705 mmol) was reacted according to General Procedure E, using BF<sub>3</sub>-OEt<sub>2</sub> (635 μL, 5.01 mmol) as the Lewis acid. The product was obtained as a pair of regioisomers, with **2d** (0.7280 g, 1.348 mmol, 81%) as the major product, and **2d'** (0.0823 g, 0.152 mmol, 9%) as the minor product. Both were isolated as maroon solids. The major product, **2d**, eluted as the first band upon purification via flash chromatography (10:1 hexanes:Et<sub>2</sub>O). <sup>1</sup>H-NMR (500 MHz, CDCl<sub>3</sub>): 7.14 (s, 1H), 6.64 (s, 1H), 3.92 (s, 6H), 3.20 (s, 2H), 2.37 (t, 2H, J = 6.2), 2.29 (t, 2H, J = 6.0), 1.68-1.79 (m, 4H); <sup>13</sup>C-NMR (125 MHz, CDCl<sub>3</sub>): 200.1, 149.2, 148.4, 136.3, 130.5, 129.7, 114.6, 112.3, 95.1, 90.5, 56.0, 42.6, 33.8, 30.5, 23.1, 22.7; IR (KBr): 2935, 2084, 2043, 2012, 1505, 1265; HRMS: m/e for C<sub>23</sub>H<sub>18</sub>Co<sub>2</sub>O<sub>8</sub> calculated 511.9716 (M-CO<sup>+</sup>), found 511.9711.

Compound **2d'** eluted as the second band in the chromatography purification sequence. The two products had a combined yield of 90%, and a ratio of 8.8:1 para attack:ortho attack (i.e., major:minor (**2d:2d'**)). <sup>1</sup>H-NMR (500 MHz, CDCl<sub>3</sub>): 7.39 (d, 1H, J = 8.6), 6.87 (d, 1H, J = 8.7), 3.90 (s, 3H), 3.84 (s, 3H), 3.34 (s, 2H), 2.31-2.36 (m, 4H), 1.67-1.79 (m, 4H); <sup>13</sup>C-NMR (75 MHz, CDCl<sub>3</sub>): 200.2, 153.4, 145.7, 136.3, 131.2, 131.1, 130.9, 128.2, 110.9, 95.2, 90.4, 61.4, 55.9, 33.8, 33.2, 30.6, 23.1, 22.8; IR (KBr): 2962, 2917, 2849, 2085, 2048, 2017, 1463, 1283; HRMS: m/e for C<sub>23</sub>H<sub>18</sub>Co<sub>2</sub>O<sub>8</sub> calculated 539.9666 (M<sup>+</sup>), found 539.9672.

**Hexacarbonyl[μ-η<sup>4</sup>-(9,10-didehydro-5,8-dimethoxy-1,2,3,4-tetrahydrobenzo[*f*]azulene)]dicobalt (**2g**)**

Compound **1g** (0.0502 g, 0.0857 mmol) was reacted according to General Procedure E using

BF<sub>3</sub>-OEt<sub>2</sub> (32  $\mu$ L, 0.26 mmol) and at -40 °C. Starting material consumption was complete after 2 h, as assessed by TLC analysis. The cyclized product **2g** was isolated by flash chromatography (15:1 hexanes:Et<sub>2</sub>O) as a maroon solid (0.0028 g, 0.0053 mmol, 6%). <sup>1</sup>H-NMR (500 MHz, CDCl<sub>3</sub>): 6.90 (½ABq, 1H, J = 9.0), 6.74 (½ABq, 1H, J = 9.0), 3.86 (s, 3H), 3.80 (s, 3H), 3.58 (s, 2H), 2.71 (t, 2H, J = 7.5), 2.52 (t, 2H, J = 7.7), 2.04 (apparent pentet, 2H, J = 7.6); IR (KBr): 2919, 2850, 2086, 2048, 2024, 1650, 1464, 1263; HRMS: m/e for C<sub>22</sub>H<sub>16</sub>Co<sub>2</sub>O<sub>8</sub> calculated 469.9611 (M-2CO<sup>+</sup>), found 469.9628.

**Hexacarbonyl[μ-η<sup>4</sup>-((11,12-η:11,12-η)-11,12-didehydro-5,6,7,8,9,10-hexahydro-1,4-dimethoxybenzo[*b*]heptalene)] dicobalt (2i)**

Compound **1i** (0.2234 g, 0.3638 mmol) was reacted according to General Procedure E using BF<sub>3</sub>-OEt<sub>2</sub> (138  $\mu$ L, 1.09 mmol). Starting material consumption was complete after 1 h, as assessed by TLC analysis. The cyclized product (**2i**) was isolated by flash chromatography (15:1 hexanes:Et<sub>2</sub>O) as a maroon solid (0.1687 g, 0.3045 mmol, 85%). <sup>1</sup>H-NMR (500 MHz, CDCl<sub>3</sub>): 6.92 (d, 1H, J = 9.0), 6.74 (d, 1H, J = 9.0), 3.86 (s, 3H), 3.82 (s, 3H), 3.40 (s, 2H), 2.52-2.56 (m, 4H), 1.78 (apparent pentet, 2H, J = 6.0), 1.56-1.67 (m, 4H); <sup>13</sup>C-NMR (75 MHz, CDCl<sub>3</sub>): 200.6, 153.8, 150.2, 141.7, 136.8, 127.1, 126.7, 112.3, 108.5, 97.7, 85.5, 56.8, 54.6, 38.6, 35.6, 34.7, 31.4, 26.2; IR (KBr): 2965, 2919, 2849, 2085, 2051, 2029, 1466, 1261; HRMS: m/e for C<sub>24</sub>H<sub>20</sub>Co<sub>2</sub>O<sub>8</sub> calculated 553.9822 (M<sup>+</sup>), found 553.9802.

**Hexacarbonyl[μ-η<sup>4</sup>-(9,10-dehydro1,2,3,4-tetrahydro-6,7,8-trimethoxybenzo[*f*]azulene)]dicobalt (2j)**

Compound **1j** (1.2170 g, 1.9757 mmol) was subjected to General Procedure E, using SnCl<sub>4</sub> (69  $\mu$ L, 5.9 mmol). Starting material consumption was complete in 1 h, as monitored by TLC. Flash chromatography on neutralized silica (20:1 hexanes:Et<sub>2</sub>O) afforded the product as a maroon solid (0.0903 g, 0.162 mmol, 8%). <sup>1</sup>H-NMR (500 MHz, CDCl<sub>3</sub>): 6.42 (s, 1H), 4.05 (s, 3H), 3.89 (s, 3H), 3.84 (s, 3H), 3.41 (s, 2H), 2.71 (t, 2H, J = 7.8), 2.54 (t, 2H, J = 7.8), 2.05 (apparent pentet, 2H, J = 7.7); <sup>13</sup>C-NMR (75 MHz, CDCl<sub>3</sub>): 200.3, 154.7, 153.9, 141.1, 139.8, 136.2, 131.3, 123.3, 108.6, 89.6, 84.5, 60.8, 60.2, 56.0, 38.8, 38.0, 35.5, 22.6; IR (ATR): 2931, 2850, 2083, 2025, 2009, 1993, 1588, 1487, 1319, 1120; HRMS: m/e for C<sub>23</sub>H<sub>18</sub>Co<sub>2</sub>O<sub>9</sub> calculated 499.9716 (M-2CO<sup>+</sup>), found 499.9699.

**Hexacarbonyl[μ-η<sup>4</sup>-(10,11-didehydro-2,3,4,5-tetrahydro-7,8,9-trimethoxy-1H-dibenzo[*a,d*]cycloheptene)]dicobalt (2k)**

Compound **1k** (0.8100 g, 1.286 mmol) was subjected to General Procedure E, using SnCl<sub>4</sub> (90  $\mu$ L, 7.7 mmol). Starting material consumption was complete in 1 h, as assessed by TLC analysis. The cyclized product **2k** (0.2865 g, 0.5026 mmol, 39%) was isolated as a maroon solid following flash chromatography using neutralized silica (20:1 hexanes:Et<sub>2</sub>O). <sup>1</sup>H-NMR (500 MHz, CDCl<sub>3</sub>): 6.48 (s, 1H), 4.04 (s, 3H), 3.90 (s, 3H), 3.85 (s, 3H), 3.18 (s, 2H), 2.35 (t, 2H, J = 6.3), 2.28 (t, 2H, J = 6.2), 1.67-1.78 (m, 4H); <sup>13</sup>C-NMR (75 MHz, CDCl<sub>3</sub>): 200.5, 154.3, 153.9, 141.2, 135.3, 133.1, 131.3, 123.2, 108.1, 96.7, 84.8, 60.8, 60.2, 56.0, 43.4, 33.6, 30.6, 23.1, 22.8; IR (ATR): 2932, 2855, 2086, 2044, 1992, 1586, 1484, 1326; HRMS: m/e for C<sub>24</sub>H<sub>20</sub>Co<sub>2</sub>O<sub>9</sub> calculated 513.9873 (M-2CO<sup>+</sup>), found 513.9852.

**Hexacarbonyl[ $\mu$ - $\eta^4$ -(10,11-didehydro-2,3,4,5-tetrahydro-7,8,9-trimethoxy-5-methyl-1*H*-dibenzo[*a,d*]cycloheptene)]dicobalt (2kk)**

Compound **1kk** (0.8530 g, 1.324 mmol) was subjected to General Procedure E, using SnCl<sub>4</sub> (46  $\mu$ L, 4.0 mmol). After 1 h reaction time, starting material consumption was complete. The cyclized product (**2kk**) was isolated as a maroon solid (0.3018 g, 0.5168 mmol, 39%) following flash chromatography (20:1 hexanes:Et<sub>2</sub>O). <sup>1</sup>H-NMR (500 MHz, CDCl<sub>3</sub>): 6.44 (s, 1H), 4.07 (s, 3H), 3.90 (s, 3H), 3.86 (s, 3H), 3.25 (q, 1H, J = 7.7), 2.16-2.46 (m, 4H), 1.75 (m, 4H), 1.26-1.3 (m, 3H); <sup>13</sup>C-NMR (75 MHz, CDCl<sub>3</sub>): 200.6, 154.5, 154.3, 140.7, 139.1, 137.7, 129.3, 121.9, 106.5, 95.3, 83.8, 60.8, 60.1, 56.0, 47.4, 31.0, 23.2, 22.8, 19.5; IR (ATR): 2930, 2859, 2081, 2038, 1993, 1586, 1486, 1319, 1259; HRMS: m/e for C<sub>25</sub>H<sub>22</sub>Co<sub>2</sub>O<sub>9</sub> calculated 555.9979 (M-CO<sup>+</sup>), found 555.9996.

**Hexacarbonyl[ $\mu$ - $\eta^4$ -(9,10-didehydro-1,2,3,4-tetrahydro-5,6,7-trimethoxybenz[*f*]azulene)]dicobalt (2l)**

Compound **1l** (0.4123 g, 0.6693 mmol) was cyclized according to General Procedure E with BF<sub>3</sub>-OEt<sub>2</sub> (254  $\mu$ L, 2.01 mmol) as Lewis acid. Starting material consumption was complete within 30 minutes, as assessed by TLC analysis. The cyclized product **2l** (0.3159 g, 0.5682 mmol, 85%) was isolated via flash chromatography (5:1 hexanes:Et<sub>2</sub>O) as a dark maroon solid. <sup>1</sup>H-NMR (500 MHz, CDCl<sub>3</sub>): 6.99 (s, 1H), 3.92 (s, 3H), 3.89 (s, 3H), 3.84 (s, 3H), 3.48 (s, 2H), 2.71 (t, 2H, J = 7.5), 2.56 (t, 2H, J = 7.4), 2.06 (apparent pentet, 2H, J = 7.6); <sup>13</sup>C-NMR (75 MHz, CDCl<sub>3</sub>): 199.9, 152.4, 150.9, 143.0, 141.6, 135.3, 133.5, 121.6, 122.3, 91.0, 88.0, 61.3, 60.9, 56.0, 39.3, 35.5, 27.5, 22.7; IR (KBr): 2938, 2086, 2048, 2018, 1118; HRMS: m/e for C<sub>23</sub>H<sub>18</sub>Co<sub>2</sub>O<sub>9</sub> calculated 527.9666 (M-CO<sup>+</sup>), found 527.9654.

**Hexacarbonyl[ $\mu$ - $\eta^4$ -(10,11-didehydro-2,3,4,5-tetrahydro-6,7,8-trimethoxy-1*H*-dibenzo[*a,d*]cycloheptene)] dicobalt (2m)**

Compound **1m** (0.3033 g, 0.4814 mmol) was cyclized according to General Procedure E with  $\text{BF}_3\text{-OEt}_2$  (183  $\mu\text{L}$ , 1.44 mmol) as Lewis acid. Starting material consumption was complete within 30 minutes, as assessed by TLC analysis. The cyclized product (**2m**) (0.2368 g, 0.4154 mmol, 86%) was isolated via flash chromatography (5:1 hexanes: $\text{Et}_2\text{O}$ ) as a dark maroon solid.  $^1\text{H-NMR}$  (500 MHz,  $\text{CDCl}_3$ ): 6.98 (s, 1H), 3.92 (s, 3H), 3.89 (s, 3H), 3.88 (s, 3H), 3.25 (s, 2H), 2.32-2.36 (m, 4H), 1.69-1.78 (m, 4H);  $^{13}\text{C-NMR}$  (75 MHz,  $\text{CDCl}_3$ ): 200.1, 152.5, 150.5, 143.0, 137.1, 133.8, 130.9, 123.4, 111.1, 95.3, 90.5, 61.7, 60.9, 56.1, 33.8, 32.9, 30.5, 23.1, 22.8; IR (KBr): 2936, 2085, 2045, 2016, 1591, 1127; HRMS:  $m/e$  for  $\text{C}_{24}\text{H}_{20}\text{Co}_2\text{O}_9$  calculated 541.9822 ( $\text{M-CO}^+$ ), found 541.9821.

**Hexacarbonyl[ $\mu$ - $\eta^4$ -(1,2,3-trimethoxy-5-(-2-(6-(phenylmethylene)-1-cyclohexen-1-yl)ethynyl)benzene)]dicobalt (11c) and Hexacarbonyl[ $\mu$ - $\eta^4$ -(10,11,-didehydro-2,3,4,5-tetrahydro-6,7,8-trimethoxy-5-phenyl-1*H*-dibenzo[*a,d*]cycloheptene)]dicobalt (2mm)**

Compound **1mm** (0.1300 g, 0.1841 mmol) was reacted according to General Procedure E using  $\text{BF}_3\text{-OEt}_2$  (70  $\mu\text{L}$ , 0.55 mmol). Starting material consumption was complete after 1 h, as assessed by TLC analysis. The cyclized product (**2mm**) was separated from its elimination isomer (**11c**) by flash chromatography (10:1 hexanes: $\text{Et}_2\text{O}$ ). The elimination product came off the column as the second band, and was isolated as a green solid (0.0546 g, 0.0845 mmol, 46%).  $^1\text{H-NMR}$  (500 MHz,  $\text{CDCl}_3$ ): 7.26 (apparent t, 2H,  $J = 7.7$ ), 7.16 (apparent t, 1H,  $J = 7.3$ ), 7.03 (d, 2H,  $J = 7.9$ ), 6.82 (s, 2H), 6.67 (t, 1H,  $J = 4.6$ ), 6.49 (s, 1H), 3.91 (s, 3H), 3.81 (s, 6H), 2.77 (t, 2H,  $J = 6.4$ ), 2.42 (apparent q, 2H,  $J = 5.7$ ), 1.81 (apparent pentet, 2H,  $J = 6.3$ );  $^{13}\text{C-NMR}$  (75 MHz,  $\text{CDCl}_3$ ): 199.9, 153.2, 137.9, 137.7, 137.3, 136.2, 134.0, 133.8, 129.2, 128.2, 127.9, 126.6, 107.6, 95.8, 93.8, 61.0, 56.1, 27.6, 27.4, 22.7; IR (KBr): 3000, 2937, 2835, 2083, 2046, 2032, 1574, 1498, 1409, 1322, 1232; HRMS:  $m/e$  for  $\text{C}_{30}\text{H}_{24}\text{Co}_2\text{O}_9$  calculated 562.0237 ( $\text{M-3CO}^+$ ), found 562.0231.

The cyclized product came off the column first, and was isolated as a maroon solid (0.0406 g, 0.0628 mmol, 34%). The combined yield was 80%, and a ratio of cyclized:elimination of 1:1.3 was determined.  $^1\text{H-NMR}$  (500 MHz,  $\text{CDCl}_3$ ): 7.05-7.15 (m, 4H), 6.90 (apparent d, 2H,  $J = 7.6$ ), 5.32 (s, 1H), 3.98 (s, 3H), 3.92 (s, 3H), 3.87 (s, 3H), 2.37-2.68 (m, 4H), 1.71-1.94 (m, 4H);  $^{13}\text{C-NMR}$  (75 MHz,  $\text{CDCl}_3$ ): 199.8, 152.8, 151.6, 142.9, 141.0, 138.4, 132.8, 131.5, 128.5, 126.9,

126.4, 125.1, 112.3, 91.7, 87.7, 61.8, 60.9, 55.8, 47.6, 35.9, 31.5, 23.5, 22.9; IR (KBr): 2928, 2858, 2084, 2027, 2015, 1638, 1448, 1242; HRMS: m/e for C<sub>30</sub>H<sub>24</sub>Co<sub>2</sub>O<sub>9</sub> calculated 562.0237 (M-3CO<sup>+</sup>), found 562.0240.

Alternatively, **1mm** (0.2081 g, 0.2947 mol) was reacted according to General Procedure E using SnCl<sub>4</sub> (103 μL, 0.884 mmol). Starting material consumption was complete after 1 h, as assessed by TLC analysis. Cyclized product **2mm** (0.1509 g, 79% yield) was isolated following flash chromatography (10:1 hexanes:Et<sub>2</sub>O).

**Hexacarbonyl[μ-η<sup>4</sup>-(11,12-didehydro-5,6,7,8,9,10-hexahydro-2,3,4-trimethoxybenzo[*b*]heptalene)]dicobalt (2n)**

Compound **1n** (0.4989 g, 0.7747 mmol) was cyclized according to General Procedure E with BF<sub>3</sub>·OEt<sub>2</sub> (294 μL, 2.32 mmol) as Lewis acid. Starting material consumption was complete within 30 minutes, as assessed by TLC analysis. The cyclized product (**2n**) (0.3804 g, 0.6514 mmol, 84%) was isolated via flash chromatography (5:1 hexanes:Et<sub>2</sub>O) as a maroon solid. <sup>1</sup>H-NMR (500 MHz, CDCl<sub>3</sub>): 6.97 (s, 1H), 3.92 (s, 3H), 3.89 (s, 3H), 3.87 (s, 3H), 3.32 (s, 2H), 2.54-2.58 (m, 4H), 1.78 (apparent pentet, 2H, J = 5.8), 1.59-1.67 (m, 4H); <sup>13</sup>C-NMR (75 MHz, CDCl<sub>3</sub>): 200.2, 152.5, 150.3, 142.9, 136.4, 133.6, 123.4, 110.8, 97.2, 91.0, 61.8, 61.0, 56.1, 39.1, 35.5, 35.0, 31.7, 26.3; IR (KBr): 2918, 2850, 2085, 2046, 2016, 1590, 1480, 1328; HRMS: m/e for C<sub>25</sub>H<sub>22</sub>Co<sub>2</sub>O<sub>9</sub> calculated 528.0029 (M-2CO<sup>+</sup>), found 528.0030.

**Hexacarbonyl[μ-η<sup>4</sup>-(10,11-didehydro-2,3,4,5-tetrahydro-6-isopropyl-7,8-dimethoxy-1*H*-dibenzo[*a,d*]cycloheptene)]dicobalt (2o) and Hexacarbonyl[μ-η<sup>4</sup>-(10,11-didehydro-2,3,4,5-tetrahydro-8-isopropyl-6,7-dimethoxy-1*H*-dibenzo[*a,d*]cycloheptene)]dicobalt (2o')**

Compound **1o** (0.2042 g, 0.3180 mmol) was reacted according to General Procedure E, using SnCl<sub>4</sub> (111 μL, 0.954 mmol). Starting material consumption was complete after 1 h. The product was obtained as a pair of regioisomers, **2o** (0.1361 g, 0.2338 mmol, 74%) and **2o'** (0.0098 g, 0.0168 mmol, 5%). The two regioisomers were separable by flash chromatography on neutralized silica (25:1 hexanes:Et<sub>2</sub>O). The major product, **2o**, eluted as the first band, and was isolated as a maroon solid. <sup>1</sup>H-NMR (500 MHz, CDCl<sub>3</sub>): 7.09 (s, 1H), 3.88 (s, 6H), 3.47-3.53 (m, 1H), 3.15 (s, 2H), 2.33-2.37 (m, 4H), 1.69-1.80 (m, 4H), 1.40 (d, 6H, J = 7.2); NOE (500 MHz, CDCl<sub>3</sub>): Irradiation at δ 3.15 resonance gave enhancement of the δ 1.40 resonance; <sup>13</sup>C-NMR (75 MHz, CDCl<sub>3</sub>): 200.3, 151.9, 149.0, 138.8, 138.0, 133.7, 131.2, 128.1, 113.9, 95.7, 92.1, 60.8, 55.7, 36.7, 33.0, 30.2, 29.0, 23.1, 22.8, 20.3; IR (ATR): 2955, 2931, 2871, 2083,



2042, 2006, 1586, 1459, 1307, 1241; HRMS: m/e for C<sub>26</sub>H<sub>24</sub>Co<sub>2</sub>O<sub>8</sub> calculated 526.0237 (M-2CO<sup>+</sup>), found 526.0241.

Product compound **2o'** came off the column as the second band, and was isolated as a maroon solid. The combined yield was 79%, with a ratio of 13.9:1 major:minor (**2o:2o'**). <sup>1</sup>H-NMR (500 MHz, CDCl<sub>3</sub>): 7.28 (s, 1H), 3.90 (s, 3H), 3.85 (s, 3H), 3.30 (septet, 1H, J = 7.2), 3.28 (s, 2H), 2.30-2.36 (m, 4H), 1.67-1.79 (m, 4H), 1.24 (d, 6H, J = 7.0); <sup>13</sup>C-NMR (125 MHz, CDCl<sub>3</sub>): 200.1, 151.0, 149.5, 141.5, 136.6, 133.8, 131.0, 128.3, 125.2, 95.0, 90.6, 61.0, 60.6, 33.7, 33.0, 30.5, 26.9, 23.4, 23.0, 22.7; IR (ATR): 2961, 2920, 2849, 2084, 2043, 2010, 1407, 1306, 1226; HRMS: m/e for C<sub>26</sub>H<sub>24</sub>Co<sub>2</sub>O<sub>8</sub> calculated 554.0186 (M-CO<sup>+</sup>), found 554.0197.

### **Hexacarbonyl[μ-η<sup>4</sup>-((6-Methylenecyclohex-1-enyl)ethynyl)benzene]dicobalt (11b)**

Compound **1b** (0.1068 g, 0.1978 mmol) was subjected to General Procedure E using BF<sub>3</sub>-OEt<sub>2</sub> (75 μL, 0.59 mmol). Starting material consumption was complete within 2 h, as determined by TLC analysis. Product **11b** was isolated as a dark brown-green solid (0.0494 g, 0.103 mmol, 52%) following flash chromatography with 100% hexanes. <sup>1</sup>H-NMR (500 MHz, CDCl<sub>3</sub>): 7.48 (apparent d, 2H, J = 7.1), 7.28-7.36 (m, 3H), 6.51 (t, 1H, J = 4.2), 4.85 (s, 1H), 4.73 (s, 1H), 2.48 (t, 2H, J = 6.4), 2.35 (apparent q, 2H, J = 5.7), 1.83 (apparent pentet, 2H, J = 6.3); <sup>13</sup>C-NMR (75 MHz, CDCl<sub>3</sub>): 199.9, 140.5, 138.5, 136.8, 135.2, 130.2, 128.7, 127.8, 112.9, 94.9, 93.6, 32.9, 29.8, 27.7, 22.9; IR (KBr): 2940, 2828, 2087, 2047, 2015, 1633; HRMS: m/e for C<sub>21</sub>H<sub>14</sub>Co<sub>2</sub>O<sub>6</sub> calculated 479.9454 (M<sup>+</sup>), found 479.9465.

### **2-[(Trimethylsilyl)ethynyl]cyclohex-1-enecarbaldehyde (12a)**

2-Bromocyclohex-1-ene-1-carbaldehyde (**8b**) (2.5314 g, 13.466 mmol) was subjected to General Procedure A with trimethylsilylacetylene (2.6453 g, 26.932 mmol), and with THF in place of DMF. Compound **12a** was isolated as a yellow oil (2.3527 g, 11.415 mmol, 85%) via flash chromatography (20:1 hexanes:Et<sub>2</sub>O). The material was spectroscopically identical to reported values.<sup>10</sup>

### **2-[(Trimethylsilyl)ethynyl]cyclohept-1-enecarbaldehyde (12b)**

2-Bromocyclohept-1-ene-1-carbaldehyde (**8c**) (0.5512 g, 2.729 mmol) was subjected to General Procedure A with trimethylsilylacetylene (0.5360 g, 5.457 mmol), and with THF in place of DMF. Compound **12b** was isolated as a yellow oil (0.5393 g, 2.450 mmol, 90%) via preparative TLC (20:1 hexanes:Et<sub>2</sub>O). <sup>1</sup>H-NMR (500 MHz, CDCl<sub>3</sub>): 10.13 (s, 1H), 2.53-2.55 (m, 2H), 2.42-2.44 (m, 2H), 1.74 (apparent pentet, 2H, J = 5.8), 1.58 (apparent pentet, 2H, J = 5.6), 1.38

(apparent pentet, 2H,  $J = 5.6$ ), 0.17 (s, 9H);  $^{13}\text{C}$ -NMR (125 MHz,  $\text{CDCl}_3$ ): 192.4, 148.3, 145.4, 106.3, 102.7, 37.2, 32.2, 25.6, 25.5, 24.1, -0.27; IR (KBr): 2958, 2925, 2853, 2133, 1675, 1449, 1251; HRMS:  $m/e$  for  $\text{C}_{13}\text{H}_{20}\text{OSi}$  calculated 220.1283 ( $\text{M}^+$ ), found 220.1274.

**[2-((Trimethylsilyl)ethynyl)cyclohept-1-enyl]methyl acetate (13b)**

Compound **12b** (0.5340 g, 2.426 mmol) was subjected to General Procedure C. The product was isolated as a yellow oil (0.6001 g, 2.272 mmol, 94%) via radial chromatography (10:1 hexanes: $\text{Et}_2\text{O}$ ).  $^1\text{H}$ -NMR (500 MHz,  $\text{C}_6\text{D}_6$ ): 4.99 (s, 2H), 2.28-2.30 (m, 2H), 2.06-2.09 (m, 2H), 1.65 (s, 3H), 1.45 (apparent pentet, 2H,  $J = 5.9$ ), 1.26-1.35 (m, 4H), 0.16 (s, 9H);  $^{13}\text{C}$ -NMR (125 MHz,  $\text{C}_6\text{D}_6$ ): 169.6, 146.5, 125.6, 105.7, 98.3, 67.3, 34.4, 32.1, 30.9, 25.9, 25.8, 20.0, -0.27; IR (ATR): 2922, 2851, 2136, 1740, 1375, 1226; HRMS:  $m/e$  for  $\text{C}_{15}\text{H}_{24}\text{O}_2\text{Si}$  calculated 264.1546 ( $\text{M}^+$ ), found 264.1547.

**(2-Ethynylcyclohept-1-enyl)methyl acetate (14b)**

Compound **13b** (0.6001 g, 2.272 mmol) was desilylated according to General Procedure F except that the reaction was kept at 0 °C over 1.5 h. Compound **14b** was isolated as a yellow oil (0.3601 g, 1.874 mmol, 82%) following radial chromatography (10:1 hexanes: $\text{Et}_2\text{O}$ ).  $^1\text{H}$ -NMR (500 MHz,  $\text{C}_6\text{D}_6$ ): 4.95 (s, 2H), 2.94 (s, 1H), 2.23-2.26 (m, 2H), 2.04-2.06 (m, 2H), 1.66 (s, 3H), 1.44 (apparent pentet, 2H,  $J = 5.8$ ), 1.25-1.34 (m, 4H);  $^{13}\text{C}$ -NMR (125 MHz,  $\text{C}_6\text{D}_6$ ): 169.8, 146.7, 124.7, 83.7, 82.0, 67.2, 34.4, 32.0, 30.8, 25.8, 25.7, 20.0; IR (ATR): 3282, 2922, 2850, 1736, 1376, 1227; HRMS:  $m/e$  for  $\text{C}_{12}\text{H}_{16}\text{O}_2$  calculated 192.1150 ( $\text{M}^+$ ), found 192.1142.

**[2-(3-((Trimethylsilyl)methyl)but-3-en-1-ynyl)cyclohept-1-enyl]methyl acetate (15b)**

Compound **14b** (0.3601 g, 1.874 mmol) was subjected to Sonogashira conditions according to General Procedure A with 2-bromo-3-(trimethylsilyl)-1-propene (0.6118 g, 3.186 mmol). The coupled compound (**15b**) was isolated as a yellow oil (0.5127 g, 1.685 mmol, 90%) via preparative TLC (10:1 hexanes: $\text{Et}_2\text{O}$ ).  $^1\text{H}$ -NMR (500 MHz,  $\text{C}_6\text{D}_6$ ): 5.28 (d, 1H,  $J = 2.2$ ), 4.96 (s, 2H), 4.92-4.93 (m, 1H), 2.31-2.33 (m, 2H), 2.10-2.12 (m, 2H), 1.68 (s, 3H), 1.66 (d, 2H,  $J = 1.0$ ), 1.50 (apparent pentet, 2H,  $J = 5.8$ ), 1.38 (apparent pentet, 2H,  $J = 5.6$ ), 1.32 (apparent pentet, 2H,  $J = 5.7$ ), 0.08 (s, 9H);  $^{13}\text{C}$ -NMR (75 MHz,  $\text{C}_6\text{D}_6$ ): 169.7, 144.8, 129.2, 125.9, 118.4, 96.4, 89.0, 67.5, 34.7, 32.2, 31.1, 28.1, 26.0, 26.0, 20.2, -1.8; IR (ATR): 2921, 2850, 1739, 1374, 1246; HRMS:  $m/e$  for  $\text{C}_{18}\text{H}_{28}\text{O}_2\text{Si}$  calculated 304.1859 ( $\text{M}^+$ ), found 304.1872.

**Hexacarbonyl[ $\mu$ - $\eta^4$ -(2-(3-((trimethylsilyl)methyl)but-3-en-1-ynyl)cyclohept-1-enyl)methyl acetate)]dicobalt (3b)**

Compound **15b** (0.5127 g, 1.685 mmol) was complexed using General Procedure G to afford complexed product **3b** (0.9250 g, 1.568 mmol, 93%) as a dark green solid, which eluted off a flash chromatographic column of neutralized silica using 10:1 hexanes:Et<sub>2</sub>O after all the excess, uncomplexed Co<sub>2</sub>(CO)<sub>8</sub> had been washed off with 100% hexanes. <sup>1</sup>H-NMR (500 MHz, C<sub>6</sub>D<sub>6</sub>): 5.40 (s, 1H), 5.15 (s, 1H), 4.94 (s, 2H), 2.50-2.52 (m, 2H), 2.14-2.16 (m, 2H), 1.84 (s, 2H), 1.71 (s, 3H), 1.49-1.55 (m, 4H), 1.36 (apparent pentet, 2H, J = 5.4), 0.09 (s, 9H); <sup>13</sup>C-NMR (75 MHz, C<sub>6</sub>D<sub>6</sub>): 200.0, 169.8, 144.3, 139.3, 138.5, 115.9, 101.6, 94.4, 65.5, 37.5, 32.6, 32.1, 27.0, 26.9, 25.9, 20.1, -1.1; IR (KBr): 2926, 2854, 2087, 2049, 2020, 1743, 1229; HRMS: m/e for C<sub>24</sub>H<sub>28</sub>Co<sub>2</sub>O<sub>8</sub>Si calculated 422.0523 (M<sup>+</sup>-6CO), found 422.0512.

**Hexacarbonyl[μ-η<sup>4</sup>-(9,10-dehydro-1,2,3,4,5,6,7,8-octahydro-8-methyleneheptalene)]dicobalt (4b)**

Compound **3b** (0.6755 g, 1.145 mmol) was treated according to General Procedure H. Starting material consumption was complete within 20 minutes, as assessed by TLC. The cyclized product (**4b**) was isolated as a maroon solid (0.4346 g, 0.9490 mmol, 83%), using 100% hexanes for flash chromatography on neutralized silica. <sup>1</sup>H-NMR (500 MHz, C<sub>6</sub>D<sub>6</sub>): 5.60 (s, 1H), 5.21 (s, 1H), 2.45-2.47 (m, 2H), 2.30-2.32 (m, 2H), 2.15-2.18 (m, 2H), 1.99-2.01 (m, 2H), 1.45-1.58 (m, 4H), 1.28 (apparent pentet, 2H, J = 5.7); <sup>13</sup>C-NMR (75 MHz, C<sub>6</sub>D<sub>6</sub>): 200.3, 147.6, 147.0, 133.9, 118.4, 95.4, 90.0, 39.2, 38.4, 34.7, 33.8, 32.2, 26.5, 26.1; IR (KBr): 2924, 2851, 2086, 2046, 2016, 1598, 1432, 1213; HRMS: m/e for C<sub>19</sub>H<sub>16</sub>Co<sub>2</sub>O<sub>6</sub> calculated 457.9611 (M<sup>+</sup>), found 457.9631.

**2-[(3-Methoxyphenyl)ethynyl] benzaldehyde (18a)**

3-Iodoanisole (1.5271 g, 6.5275 mmol) and 2-ethynylbenzaldehyde<sup>11</sup> (0.5659 g, 4.352 mmol), were subjected to reaction via General Procedure A. Flash chromatography (25:1 hexanes:Et<sub>2</sub>O) afforded the product **18a** as a yellow oil (0.8583 g, 3.646 mmol, 84%), which was characterized as spectroscopically identical to reported values.<sup>12</sup>

**2-[(3,5-Dimethoxyphenyl)ethynyl]benzaldehyde (18b)**

Compound 2-ethynylbenzaldehyde (0.6020 g, 4.629 mmol) was subjected to General Procedure A along with 1-bromo-3,5-dimethoxybenzene (1.4997 g, 6.9439 mmol), with the modification that Pd(PPh<sub>3</sub>)<sub>2</sub>Cl<sub>2</sub> (0.0975 g, 0.139 mmol, 3 mol%) was used as catalyst instead of Pd(PPh<sub>3</sub>)<sub>4</sub>, and the reaction flask was placed in an oil bath set to a temperature of 60 °C instead of room temperature for overnight (20 h). The product **18b** was isolated using flash chromatography

(10:1 hexanes:Et<sub>2</sub>O) as a yellow solid (0.9732 g, 3.657 mmol, 79%), mp. 75-77 °C (lit. mp. 76-77 °C<sup>13</sup>), and which was characterized as spectroscopically identical to reported values.<sup>13</sup>

### **2-[(3,5-Dimethoxyphenyl)ethynyl]benzyl acetate (19b)**

Compound **19b** was synthesized according to General Procedure C from **18b** (0.9732 g, 3.657 mmol). The product was isolated as a pale yellow oil (0.9656 g, 3.114 mmol, 85%) via flash chromatography (7:1 hexanes:Et<sub>2</sub>O). <sup>1</sup>H-NMR (300 MHz, CDCl<sub>3</sub>): 7.55-7.58 (m, 1H), 7.40-7.43 (m, 1H), 7.28-7.37 (m, 2H), 6.71 (dd, 2H, J = 2.4, J = 0.5), 6.48 (t, 1H, J = 2.3), 5.36 (s, 2H), 3.79 (s, 6H), 2.12 (s, 3H); <sup>13</sup>C-NMR (75 MHz, CDCl<sub>3</sub>): 170.8, 160.7, 137.6, 132.3, 128.6, 128.5, 128.2, 124.3, 122.6, 109.4, 102.1, 94.5, 86.2, 64.8, 55.4, 21.0; IR (ATR): 2953, 2836, 1742, 1585, 1355, 1233; HRMS: m/e for C<sub>19</sub>H<sub>18</sub>O<sub>4</sub> calculated 310.1205 (M<sup>+</sup>), found 310.1205.

### **Hexacarbonyl[μ-η<sup>4</sup>-(2-(3,5-dimethoxyphenyl)ethynyl)benzyl acetate)]dicobalt (5b)**

Compound **19b** (0.9656 g, 3.114 mmol) was complexed using General Procedure D to afford product **5b** (1.7463 g, 2.9302 mmol, 94%) as a dark brown solid. The product was eluted from a column of silica using 7:1 hexanes:Et<sub>2</sub>O. <sup>1</sup>H-NMR (500 MHz, CDCl<sub>3</sub>): 7.67 (dd, 1H, J = 7.3, J = 1.85), 7.42 (dd, 1H, J = 7.6, J = 1.7), 7.33-7.40 (m, 2H), 6.63 (d, 2H, J = 2.2), 6.47 (t, 1H, J = 2.3), 5.16 (s, 2H), 3.80 (s, 6H), 2.05 (s, 3H); <sup>13</sup>C-NMR (75 MHz, CDCl<sub>3</sub>): 1992.1, 170.5, 160.9, 140.7, 136.0, 134.6, 132.4, 129.6, 128.8, 128.4, 107.6, 100.0, 95.3, 89.0, 63.6, 55.4, 20.8; IR (ATR): 2940, 2839, 2085, 2032, 2000, 1737, 1586, 1421, 1241; HRMS: m/e for C<sub>25</sub>H<sub>18</sub>Co<sub>2</sub>O<sub>10</sub> calculated 483.9767 (M-4CO<sup>+</sup>), found 483.9752.

### **3-[(3,5-Dimethoxyphenyl)ethynyl]furan-2-carbaldehyde (18d)**

[(3,5-Dimethoxyphenyl)ethynyl]trimethylsilane (**7'd**) (0.9212 g, 3.935 mmol) was subjected to tandem desilylation/Sonogashira chemistry according to General Procedure B with 3-bromo-2-formylfuran (1.1977 g, 6.8861 mmol) and Pd(PPh<sub>3</sub>)<sub>2</sub>Cl<sub>2</sub> (0.0828 g, 0.118 mmol, 3 mol%) as the catalyst, with the exception that the mixture was warmed to rt. The product (**18d**) was isolated with flash chromatography (7:1 hexanes:Et<sub>2</sub>O) as a light yellow solid (0.8263 g, 3.227 mmol, 82%). mp. 88-88.5 °C; <sup>1</sup>H-NMR (500 MHz, CDCl<sub>3</sub>): 9.85 (d, 1H, J = 0.8), 7.64 (dd, 1H, J = 1.8, J = 0.8), 6.68 (d, 2H, J = 2.3), 6.66 (d, 1H, J = 1.8), 6.50 (t, 1H, J = 2.3), 3.79 (s, 6H); <sup>13</sup>C-NMR (125 MHz, CDCl<sub>3</sub>): 176.1, 160.6, 152.8, 147.6, 123.1, 119.4, 115.2, 109.5, 102.7, 97.4, 77.8, 55.5; IR (ATR): 2940, 2832, 2219, 1669, 1586, 1424, 1208; HRMS: m/e for C<sub>15</sub>H<sub>12</sub>O<sub>4</sub> calculated 256.0736 (M<sup>+</sup>), found 256.0731.

### **[3-((3,5-Dimethoxyphenyl)ethynyl)furan-2-yl]methyl acetate (19d)**

Compound **18d** (0.8263 g, 3.227 mmol) was treated according to General Procedure C. The product (**19d**) was isolated using flash chromatography (5:1 hexanes:Et<sub>2</sub>O) as a colourless solid (0.8552 g, 2.850 mmol, 88%). mp. 58.5-60 °C; <sup>1</sup>H-NMR (500 MHz, CDCl<sub>3</sub>): 7.39 (d, 1H, J = 1.9), 6.66 (d, 2H, J = 2.3), 6.50 (d, 1H, J = 1.8), 6.46 (t, 1H, J = 2.2), 5.20 (s, 2H), 3.78 (s, 6H), 2.10 (s, 3H); <sup>13</sup>C-NMR (125 MHz, CDCl<sub>3</sub>): 170.5, 160.6, 152.2, 143.1, 124.1, 113.1, 109.2, 108.0, 101.9, 93.4, 79.3, 56.6, 55.4, 20.8; IR (KBr): 3125, 2941, 2840, 2218, 1745, 1590, 1156; HRMS: m/e for C<sub>17</sub>H<sub>16</sub>O<sub>5</sub> calculated 300.0998 (M<sup>+</sup>), found 300.0998.

**Hexacarbonyl[μ-η<sup>4</sup>-(3-((3,5-dimethoxyphenyl)ethynyl)furan-2-yl)methyl acetate)]dicobalt (5d)**

Compound **19d** (0.8552 g, 2.850 mmol) was complexed according to General Procedure D. The complexed product **5d** was isolated using flash chromatography (5:1 hexanes:Et<sub>2</sub>O) after washing the column with 100% hexanes to remove any excess, uncomplexed Co<sub>2</sub>(CO)<sub>8</sub>. The product (1.5958 g, 2.7235 mmol, 96%) was a dark brown solid in appearance. <sup>1</sup>H-NMR (500 MHz, CDCl<sub>3</sub>): 7.46 (d, 1H, J = 2.0), 6.68 (d, 2H, J = 2.2), 6.56 (d, 1H, J = 1.9), 6.46 (t, 1H, J = 2.3), 5.08 (s, 2H), 3.81 (s, 6H), 2.04 (s, 3H); <sup>13</sup>C-NMR (125 MHz, CDCl<sub>3</sub>): 198.9, 170.5, 160.9, 146.8, 143.4, 140.0, 122.7, 112.9, 107.4, 100.0, 92.9, 79.3, 56.6, 55.4, 20.5; IR (KBr): 2972, 2941, 2089, 2049, 2028, 2008, 1994, 1743, 1587, 1225; HRMS: m/e for C<sub>23</sub>H<sub>16</sub>Co<sub>2</sub>O<sub>11</sub> calculated 529.9458 (M<sup>+</sup>), found 529.9470.

**Hexacarbonyl[μ-η<sup>4</sup>-(10,11-dehydro-2,4-dimethoxy-5*H*-dibenzo[*a,d*]cycloheptene)]dicobalt (6b)**

Compound **6b** was synthesized according to General Procedure E from starting material **5b** (0.2052 g, 0.3443 mmol), using SnCl<sub>4</sub> (121 μL, 1.03 mmol). The reaction was allowed warm to rt and starting material consumption was complete in 15 h, as monitored by TLC. The product was recovered as a dark maroon solid (0.0938 g, 0.175 mmol, 51%) using flash chromatography (10:1 hexanes:Et<sub>2</sub>O). <sup>1</sup>H-NMR (500 MHz, CDCl<sub>3</sub>): 7.68-7.71 (m, 1H), 7.31-7.38 (m, 3H), 6.87 (d, 1H, J = 2.5), 6.54 (d, 1H, J = 2.5), 3.94 (s, 2H), 3.90 (s, 3H), 3.86 (s, 3H); <sup>13</sup>C-NMR (75 MHz, CDCl<sub>3</sub>): 199.6, 159.6, 157.2, 139.4, 138.1, 137.6, 132.0, 129.8, 128.6, 127.5, 118.4, 108.3, 99.1, 91.6, 90.9, 56.1, 55.4, 31.8; IR (ATR): 2938, 2840, 2090, 2052, 1996, 1572, 1138; HRMS: m/e for C<sub>23</sub>H<sub>14</sub>Co<sub>2</sub>O<sub>8</sub> calculated 479.9454 (M-2CO<sup>+</sup>), found 479.9455.

**Hexacarbonyl[μ-η<sup>4</sup>-(4,5-dehydro-7,9-dimethoxy-10*H*-benzo[5,6]cyclohepta[1,2-*b*]furan)]dicobalt (6d)**

Compound **5d** (0.1582 g, 0.2700 mmol) was treated according to General Procedure E, using  $\text{SnCl}_4$  (95  $\mu\text{L}$ , 0.81 mmol). Starting material consumption was complete in 2 h, as monitored by TLC. The product **6d** was isolated using flash chromatography (neutralized silica, 15:1 hexanes: $\text{Et}_2\text{O}$ ) as a maroon solid (0.0232 g, 0.0441 mmol, 17%).  $^1\text{H}$ -NMR (500 MHz,  $\text{CDCl}_3$ ): 7.38 (d, 1H,  $J = 1.4$ ), 6.86 (d, 1H,  $J = 2.2$ ), 6.60 (d, 1H,  $J = 1.4$ ), 6.50 (d, 1H,  $J = 2.2$ ), 4.14 (s, 2H), 3.87 (s, 3H), 3.85 (s, 3H);  $^{13}\text{C}$ -NMR (125 MHz,  $\text{CDCl}_3$ ): 199.3, 159.5, 157.3, 150.1, 142.5, 139.3, 118.0, 114.5, 111.9, 109.9, 98.9, 91.6, 81.5, 55.9, 55.3, 25.4; IR (ATR): 2928, 2836, 2086, 2016, 1995, 1561, 1318, 1141; HRMS:  $m/e$  for  $\text{C}_{21}\text{H}_{12}\text{Co}_2\text{O}_9$  calculated 469.9247 ( $\text{M}-2\text{CO}^+$ ), found 469.9245.

### **2,3,4,4a,5,10,11,11a-Octahydro-7,8-dimethoxy-1H-dibenzo[a,d]cycloheptene (20)**

To a stirred solution of compound **2d** (0.5101 g, 0.9446 mmol), dissolved in degassed 1,2-dichloroethane (14.4 mL), was added bis(trimethylsilyl)acetylene (429  $\mu\text{L}$ , 1.89 mmol) and triethylsilane (754  $\mu\text{L}$ , 4.72 mmol). The reaction was placed in an oil bath set at 65  $^\circ\text{C}$ , and allowed to stir for 6 h under a nitrogen atmosphere. The oil bath was removed, and the solution allowed to cool to room temperature, at which point, trifluoroacetic acid (3.6 mL) was added. After stirring for an additional 12 h, the mixture was dissolved in  $\text{Et}_2\text{O}$  (75 mL) and extracted with  $\text{dH}_2\text{O}$  (3 x 75 mL). The organic fraction was dried over  $\text{MgSO}_4$ , filtered, and the solvent removed under reduced pressure. Preparative TLC (15:1 hexanes: $\text{Et}_2\text{O}$ ) afforded compound **20** as a colourless solid of inseparable diastereomers (1:1) (0.1980 g, 0.7610 mmol, 81%).  $^1\text{H}$ -NMR (500 MHz,  $\text{CDCl}_3$ ): 6.66 (s, 1H), 6.65 (s, 1H), 6.64 (s, 1H), 6.60 (s, 1H), 3.86 (s, 9H), 3.85 (s, 3H), 2.86 (apparent t, 1H,  $J = 13.1$ ), 2.76 (dd, 1H,  $J = 10.4$ ,  $J = 14.0$ ), 2.69 (m, 1H), 2.61 (dd, 1H,  $J = 14.0$ ,  $J = 6.7$ ), 2.32 (d, 1H,  $J = 14.0$ ), 0.89-1.96 (m, 27H);  $^{13}\text{C}$ -NMR (125 MHz,  $\text{CDCl}_3$ ): 146.6, 146.5, 146.5, 146.4, 135.4, 135.1, 134.3, 113.9, 113.1, 112.6, 112.5, 56.1, 56.0, 55.9, 48.5, 44.0, 43.8, 38.1, 36.4, 35.9, 35.4, 35.0, 26.8, 26.4; IR (KBr): 2919, 2851, 1516, 1449, 1271; HRMS:  $m/e$  for  $\text{C}_{17}\text{H}_{24}\text{O}_2$  calculated 260.1776 ( $\text{M}^+$ ), found 260.1775.

### **6,6-Dimethyl-7,8-dihydro-4H-benzo[d][1,3]dioxin-5(6H)-one (23)**

A stirred solution of diisopropylamine (2.7 mL, 19 mmol) in THF (27.1 mL) was cooled to -78  $^\circ\text{C}$ .  $n\text{-BuLi}$  (2.5 M in hexanes, 6.8 mL 17 mmol) was added dropwise, and the solution allowed to stir for 30 minutes to generate LDA. Following the 0.5 h, dioxinone **24**,<sup>14</sup> (2.0906 g, 13.570 mmol) dissolved in THF (13.6 mL), was added to the reaction flask dropwise over 5 minutes. This solution was allowed to stir for 1 h at -78  $^\circ\text{C}$ . MeI (3.8522 g, 27.140 mmol), dissolved in

THF (7.7 mL), was added to the reaction following the hour, and stirring continued at -78 °C for 1 h. The reaction was warmed to -30 °C over 30 minutes, and stirred at this temperature for a further hour. It was then warmed to 0 °C and stirred for 3 h. At this point, NH<sub>4</sub>Cl (aq, sat) was added, and subjected to a conventional extractive workup (Et<sub>2</sub>O). This provided the monomethylated product in a sufficiently pure state for further use as a yellow oil (1.8475 g, 10.992 mmol, 81%). This product was verified by <sup>1</sup>H- and <sup>13</sup>C-NMR spectroscopy, and found to be identical to reported values.<sup>14</sup>

This monomethylated compound, without further purification, was then resubjected to the identical procedure to generate the *gem*-dimethyl product (**23**) (1.9012 g, 10.441 mmol, 95%), which was isolated as a viscous pale yellow oil following flash chromatography (2:1 hexanes:Et<sub>2</sub>O). <sup>1</sup>H-NMR (500 MHz, CDCl<sub>3</sub>): 5.11 (s, 2H), 4.39 (t, 2H, J = 1.9), 2.40-2.44 (m, 2H), 1.81 (t, 2H, J = 6.4), 1.10 (s, 6H); <sup>13</sup>C-NMR (125 MHz, CDCl<sub>3</sub>): 201.2, 168.2, 109.7, 91.3, 63.2, 40.1, 34.3, 24.8, 24.4; IR (ATR): 2961, 2928, 2865, 1630, 1392, 1236; HRMS: m/e for C<sub>10</sub>H<sub>14</sub>O<sub>3</sub> calculated 182.0943 (M<sup>+</sup>), found 182.0944.

### **2-(Hydroxymethyl)-4,4-dimethyl-3-[(trimethylsilyl)ethynyl]cyclohex-2-enone (25)**

Compound **25** was synthesized according to methods adapted from Majetich and Grove,<sup>14</sup> and Brummond and Gao.<sup>15</sup> In a round bottom flask, (trimethylsilyl)acetylene (1.7652 g, 17.972 mmol) was dissolved in THF (30 mL). The reaction flask was cooled to -78 °C, at which point, <sup>n</sup>BuLi (2.5 M in hexanes, 5.4 mL, 13 mmol) was added dropwise into the stirred solution, and allowed to stir for 30 minutes. After the 30 minutes, the reaction mixture was allowed to warm to 0 °C, at which point **23** (1.6363 g, 8.9860 mmol), dissolved in THF (9.0 mL), was added dropwise into the reaction flask, and the solution allowed to stir for 1 h. The reaction was allowed to warm to room temperature and proceed for another 6 h. NH<sub>4</sub>Cl (aq, sat) was added, and the mixture subjected to a conventional extractive workup (Et<sub>2</sub>O). The viscous yellow oil was then dissolved in THF (38.0 mL), and 3 M HCl (1.3 mL) was added dropwise into the flask. This reaction was allowed to stir for 1 h at room temperature, after which NaHCO<sub>3</sub> (aq, sat) was added. Following a conventional extractive workup (Et<sub>2</sub>O), flash chromatography (1:1 hexanes:Et<sub>2</sub>O) afforded **25** (1.8928 g, 7.5670 mmol, 84%) as a pale yellow oil. <sup>1</sup>H-NMR (500 MHz, CDCl<sub>3</sub>): 4.44 (d, 2H, J = 6.7), 3.04 (t, 1H, J = 6.8), 2.44 (t, 2H, J = 6.9), 1.82 (t, 2H, J = 6.9), 1.21 (s, 6H), 0.18 (s, 9H); <sup>13</sup>C-NMR (125 MHz, CDCl<sub>3</sub>): 199.7, 148.1, 139.2, 113.0, 99.8, 60.6, 35.8, 35.4, 34.2, 27.4, -0.41; IR (KBr): 3474, 2963, 2930, 2902, 2869, 2137, 1664, 1581,

1356, 1251; HRMS: m/e for C<sub>14</sub>H<sub>22</sub>O<sub>2</sub>Si calculated 250.1389 (M<sup>+</sup>), found 250.1387.

### **3-Ethynyl-2-(hydroxymethyl)-4,4-dimethylcyclohex-2-enone (26)**

Compound **25** (1.8928 g, 7.5670 mmol) was desilylated according to General Procedure F except that the reaction was complete within 30 minutes at 0 °C. The desilylated product (**26**) was isolated as a colourless solid (1.1875 g, 6.67 mmol, 88%) following flash chromatography (1:1 hexanes:Et<sub>2</sub>O). mp. 83-84.5 °C; <sup>1</sup>H-NMR (500 MHz, CDCl<sub>3</sub>): 4.39 (s, 2H), 3.82 (s, 1H), 3.04 (s, 1H), 2.43 (t, 2H, J = 6.9), 1.81 (t, 2H, J = 6.9), 1.19 (s, 6H); <sup>13</sup>C-NMR (75 MHz, CDCl<sub>3</sub>): 199.9, 147.4, 140.4, 93.6, 73.9, 60.0, 35.9, 35.4, 34.2, 27.3; IR (ATR): 3395, 3201, 2956, 2930, 2895, 2867, 2080, 1644, 1574, 1360, 1196; HRMS: m/e for C<sub>11</sub>H<sub>14</sub>O<sub>2</sub> calculated 178.0994 (M<sup>+</sup>), found 178.0994.

### **2-(Hydroxymethyl)-3-[(3-isopropyl-4-methoxyphenyl)ethynyl]-4,4-dimethylcyclohex-2-enone (28)**

To a mixture of Pd(PPh<sub>3</sub>)<sub>4</sub> (0.1008 g, 0.08723 mmol, 5 mol%) and CuI (0.0266 g, 0.140 mmol, 8 mol%) was added a solution of **27**<sup>16</sup> (0.7225 g, 2.618 mmol) dissolved in dry DMF (2.9 mL), followed by a solution of **26** (0.3108 g, 1.745 mmol) in dry DMF (2.9 mL). Diisopropylamine (11.6 mL), which had been degassed for 1.5 h, was then added to the reaction. The reaction mixture was allowed to stir for 48 h under a nitrogen atmosphere and at room temperature. The mixture was then filtered through Celite®, and subjected to a conventional extractive workup (Et<sub>2</sub>O). Preparative TLC (1:1 hexanes:Et<sub>2</sub>O) afforded **28** as a viscous yellow oil (0.3983 g, 1.221 mmol, 70%). <sup>1</sup>H-NMR (500 MHz, CDCl<sub>3</sub>): 7.30-7.34 (m, 2H), 6.80 (d, 1H, J = 8.4), 4.61 (d, 2H, J = 6.7), 3.84 (s, 3H), 3.28 (septet, 1H, J = 6.9), 3.16 (t, 1H, J = 6.8), 2.52 (t, 2H, J = 6.8), 1.91 (t, 2H, J = 6.8), 1.34 (s, 6H), 1.20 (d, 6H, J = 6.9); <sup>13</sup>C-NMR (125 MHz, CDCl<sub>3</sub>): 199.7, 158.2, 149.3, 137.6, 131.1, 129.8, 113.9, 110.4, 107.8, 84.1, 60.9, 55.4, 36.0, 35.8, 34.3, 27.7, 26.7, 22.4; IR (ATR): 3453, 2961, 2929, 2869, 2839, 2183, 1648, 1493, 1245; HRMS: m/e for C<sub>21</sub>H<sub>26</sub>O<sub>3</sub> calculated 326.1882 (M<sup>+</sup>), found 326.1882.

### **[2-((3-Isopropyl-4-methoxyphenyl)ethynyl)-3,3-dimethyl-6-oxocyclohex-1-enyl]methyl acetate (29)**

Compound **28** (0.3983 g, 1.221 mmol) was dissolved in dry THF (14.1 mL), and the solution was cooled to a temperature of -78 °C. Pyridine (3.0 mL, 37 mmol) was added to the reaction, followed by acetic anhydride (5.8 mL, 61 mmol) and DMAP (0.7459 g, 6.105 mmol). The reaction was allowed to warm to room temperature under a nitrogen atmosphere over the course



of 4 h, at which point TLC analysis showed complete starting material consumption. Following the addition NH<sub>4</sub>Cl (aq, sat), the mixture was subjected to a conventional extractive workup (Et<sub>2</sub>O). Preparative TLC (1:1 hexanes:Et<sub>2</sub>O) afforded compound **29** as an off-white solid (0.4240 g, 1.152 mmol, 94%). mp. 123.5-124.5 °C; <sup>1</sup>H-NMR (500 MHz, CDCl<sub>3</sub>): 7.30-7.32 (m, 2H), 6.78 (d, 1H, J = 8.3), 5.00 (s, 2H), 3.80 (s, 3H), 3.25 (septet, 1H, J = 6.9), 2.51 (t, 2H, J = 6.8), 1.99 (s, 3H), 1.90 (t, 2H, J = 6.8), 1.33 (s, 6H), 1.18 (d, 6H, J = 7.0); <sup>13</sup>C-NMR (75 MHz, CDCl<sub>3</sub>): 196.3, 170.8, 158.4, 153.1, 137.6, 134.0, 131.4, 130.1, 113.8, 110.4, 108.7, 84.3, 59.7, 55.5, 36.1, 36.0, 34.1, 27.8, 26.7, 22.4, 21.0; IR (ATR): 2956, 2938, 2868, 2181, 1725, 1668, 1248; HRMS: m/e for C<sub>23</sub>H<sub>28</sub>O<sub>4</sub> calculated 368.1988 (M<sup>+</sup>), found 368.1998.

---

## References

- 1 J. Chen, J. W. Kampf, and A. J. McNeil, *Langmuir* 2010, **26**, 13076.
- 2 B. Salem, E. Delort, P. Klotz, and J. Suffert, *Org. Lett.*, 2003, **5**, 2307.
- 3 D. Mujahidin and S. Doye, *Eur. J. Org. Chem.* 2005, 2689.
- 4 Y.-C. Hsu, C.-M. Ting, and R.-S. Liu, *J. Am. Chem. Soc.* 2009, **131**, 2090.
- 5 Y. Yamaguchi, Y. Matsubara, T. Ochi, T. Wakamiya, and Z. Yoshida, *J. Am. Chem. Soc.* 2008, **130**, 13867.
- 6 Y. Nishimoto, S. A. Babu, M. Yasuda, and A. Baba, *J. Org. Chem.* 2008, **73**, 9465.
- 7 A. Gangjee, O. A. Namjoshi, O. A. Keller, and C. D. Smith, *Bioorg. Med. Chem.*, 2011, **19**, 4355.
- 8 M. Kato, F. Kido, M.-D. Wu, and A. Yoshikoshi, *Bull. Chem. Soc. Jpn.* 1974, **47**, 1516.
- 9 M. Erdélyi and Gogoll, *J. Org. Chem.* 2001, **66**, 4165.
- 10 K. M. Waddell, T. Bekele, and M. A. Lipton, *J. Org. Chem.* 2006, **71**, 8372.
- 11 R. M. Acheson and G. C. M. Lee, *J. Chem. Soc., Perkin Trans I* 1987, 2321.
- 12 N. T. Patil, A. Konala, V. Singh, and V. V. N. Reddy, *Eur. J. Org. Chem.* 2009, 5178.
- 13 G. Majetich and G. Zou, *Org. Lett.* 2008, **10**, 81.
- 14 G. Majetich and J. Grove, *Heterocycles* 2012, **84**, 983.
- 15 K. M. Brummond and D. Gao, *Org. Lett.* 2003, **5**, 3491.
- 16 D. M. B. Hickey, P. D. Leeson, R. Novelli, V. P. Shah, B. E. Burpitt, L. P. Crawford, B. J. Davies, M. B. Mitchell, K. D. Pancholi, D. Tuddenham, N. L. Lewis, and C. O'Farrell, *J. Chemical Soc. Perkin Trans. I* 1988, 3103.

Phenyl-CC-Cyclopentenecarbaldehyde  
 Experiment 5  
 Topspin 500  
 Tuesday 07 December 2010

Current Data Parameters  
 NAME Phenyl-CC-Cyclopentenecarbaldehyde  
 EXPNO 5  
 PROCNO 1

F2 - Acquisition Parameters  
 Date\_ 20101207  
 Time 12.13  
 INSTRUM spect  
 PROBHD 5 mm PABBO BB/  
 PULPROG zgpg30  
 TD 32768  
 SOLVENT H2O  
 NS 8  
 DS 2  
 SWH 10964.912 Hz  
 FIDRES 0.334623 Hz  
 AQ 1.4942708 sec  
 RG 22.6  
 DW 45.600 usec  
 DE 6.50 usec  
 TE 294.2 K  
 D1 2.00000000 sec  
 d12 0.00002000 sec  
 D16 0.00002000 sec  
 TDO 1

===== CHANNEL f1 =====  
 NUC1 1H  
 P1 14.80 usec  
 P2 29.60 usec  
 PL1 2000.00 usec  
 PL0 120.00 dB  
 PL1 -1.40 dB  
 SFO1 500.1305001 MHz  
 SP1 35.19 dB  
 SPNAM1 Squal100.1000  
 SPOAL1 0.500  
 SPOFFS1 0.00 Hz

===== GRADIENT CHANNEL =====  
 GPNAM1 SINE.100  
 GPNAM2 SINE.100  
 GPZ1 31.00 s  
 GPZ2 11.00 s  
 P16 1000.00 usec

F2 - Processing parameters  
 SI 32768  
 SF 500.1300184 MHz  
 WDW EM  
 SSB 0  
 LB 0.20 Hz  
 GB 0  
 PC 1.00

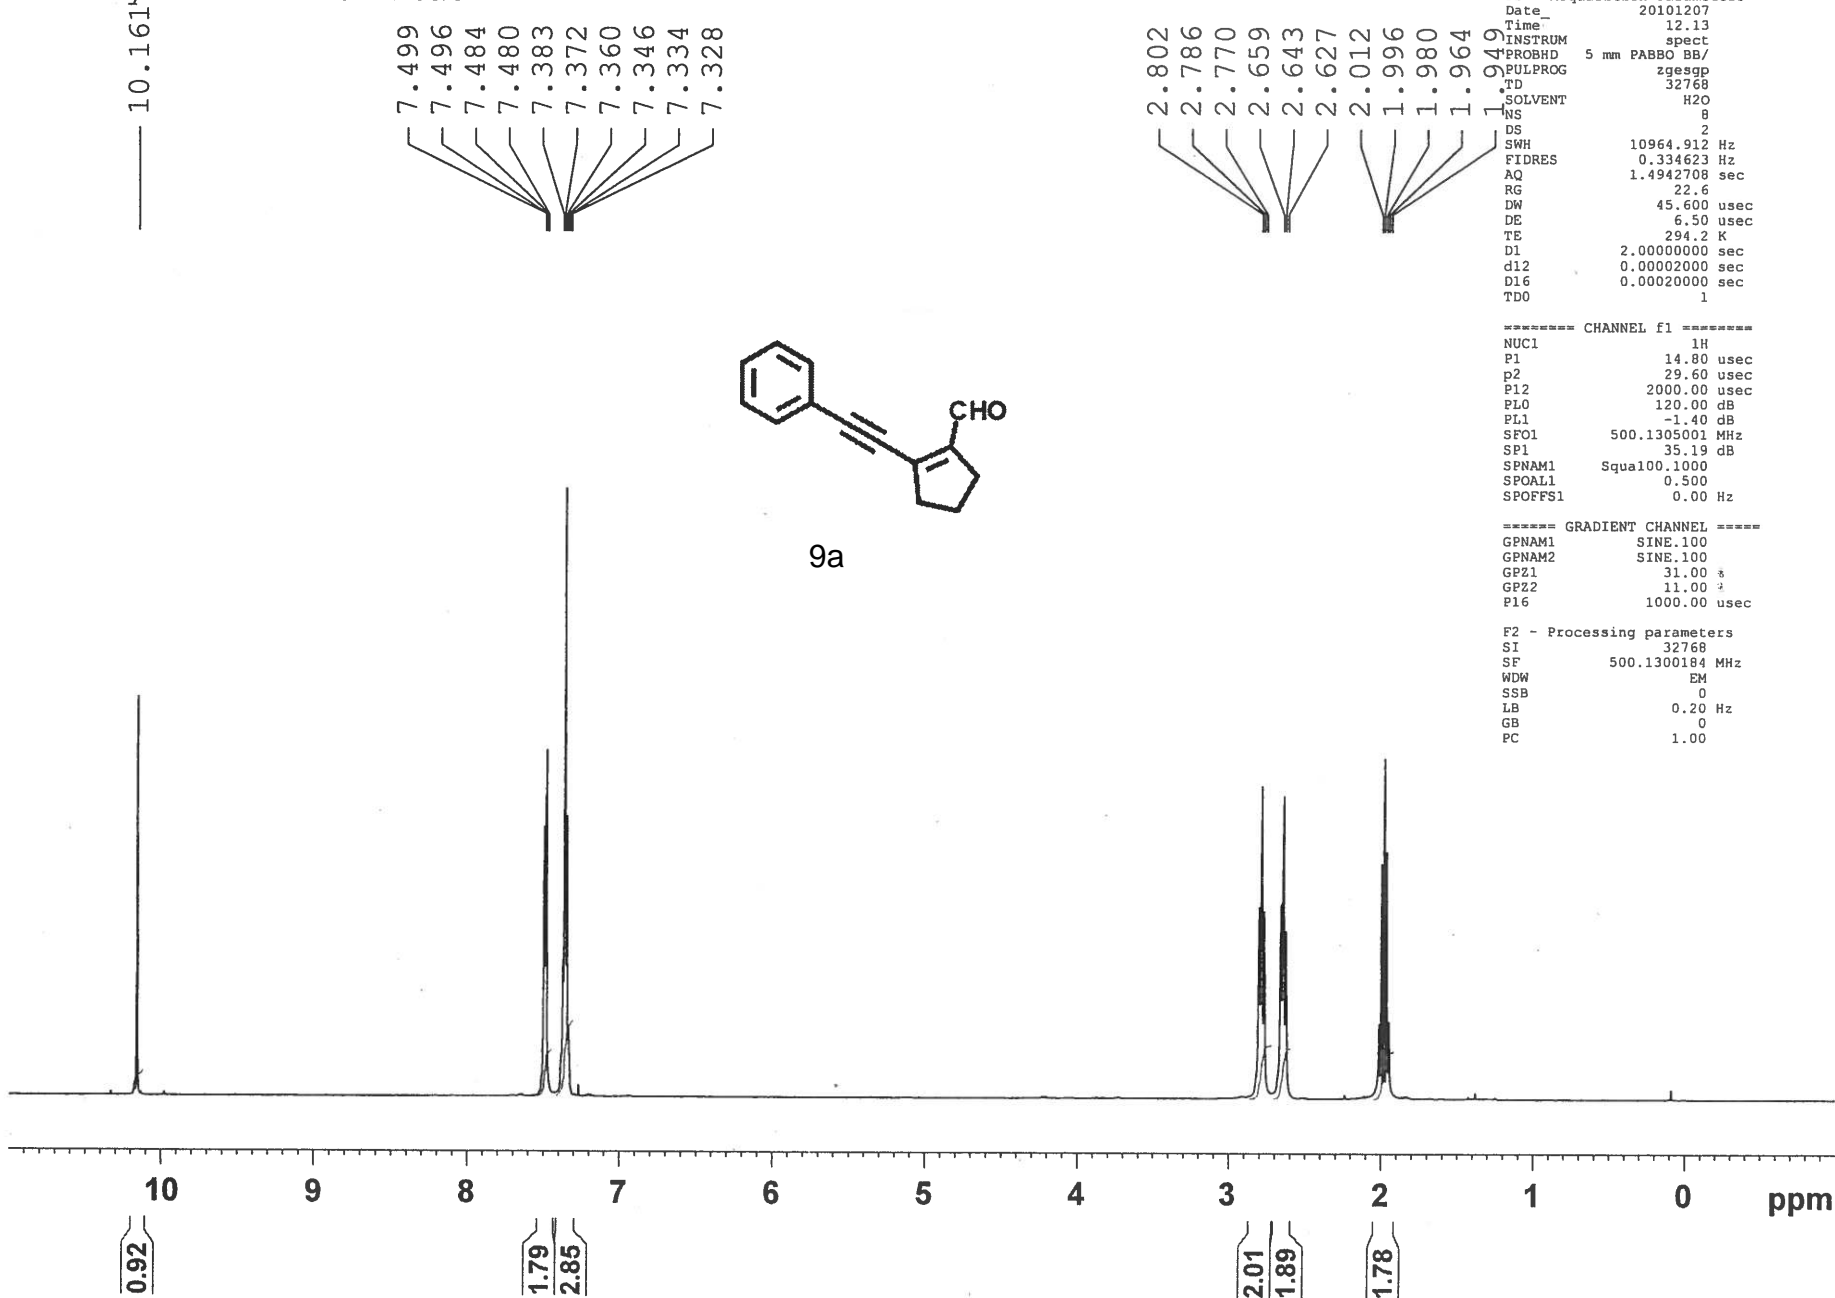

Phenyl-CC-Cyclopentenecarbaldehyde 13C

Experiment 2

Ultra 300

Thursday 02 September 2010

188.9444

|        |        |        |       |       |       |
|--------|--------|--------|-------|-------|-------|
| 148.66 | 131.99 | 100.83 | 85.43 | 61.27 | 39.03 |
| 142.28 | 129.52 | 93.27  | 77.56 | 50.33 | 30.07 |
|        | 123.67 |        | 73.24 |       | 29.76 |
|        | 122.28 |        | 75.81 |       | 25.34 |
|        |        |        |       |       | 22.28 |

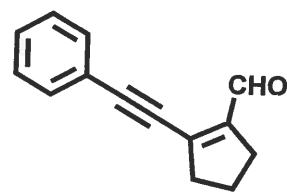

9a

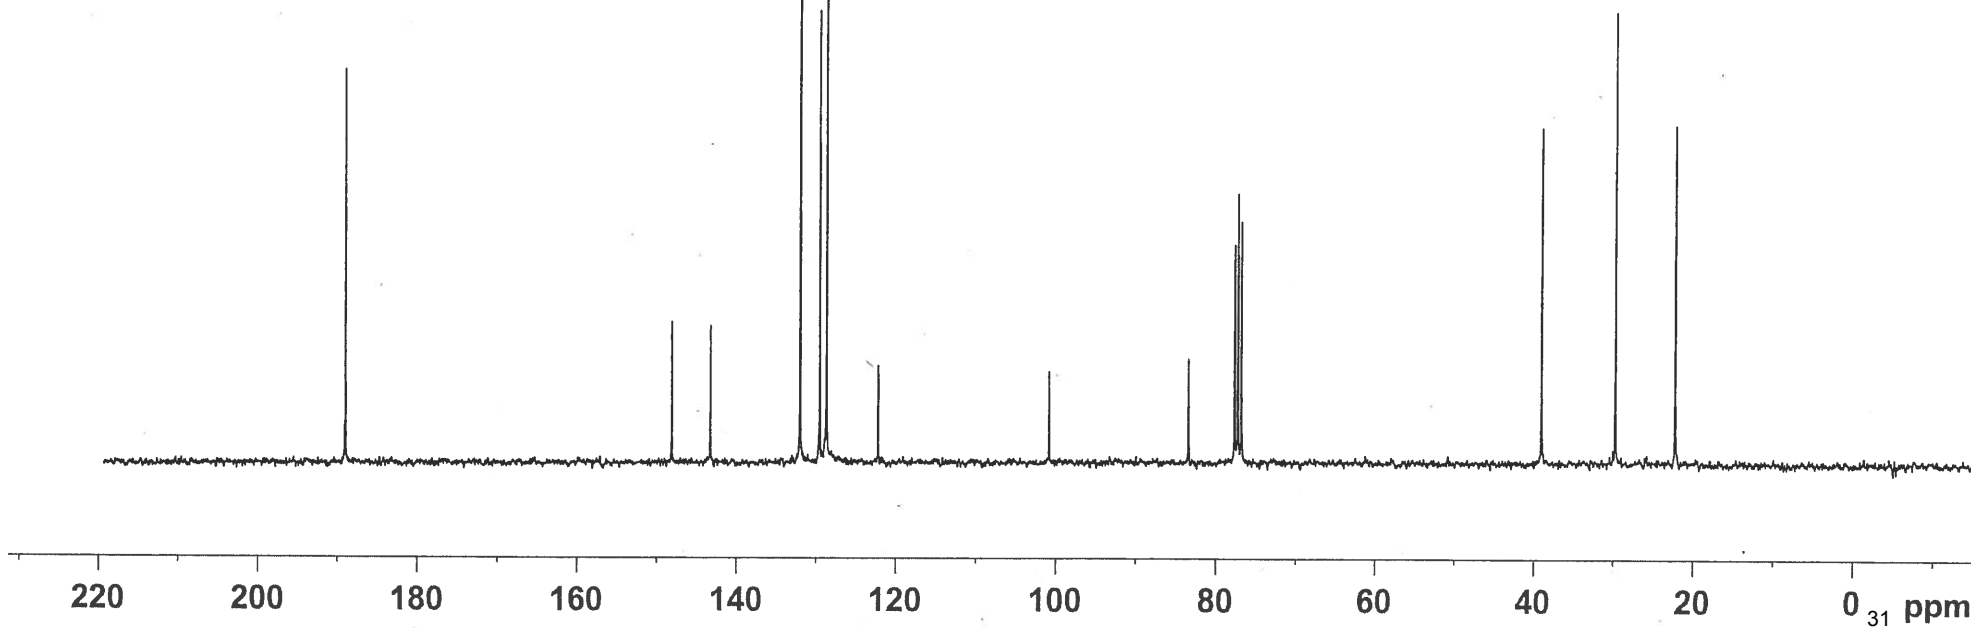

Phenyl-Cyclohexenecarbaldehyde  
 Experiment 5  
 500 Topsin  
 Saturday 22 May 2010

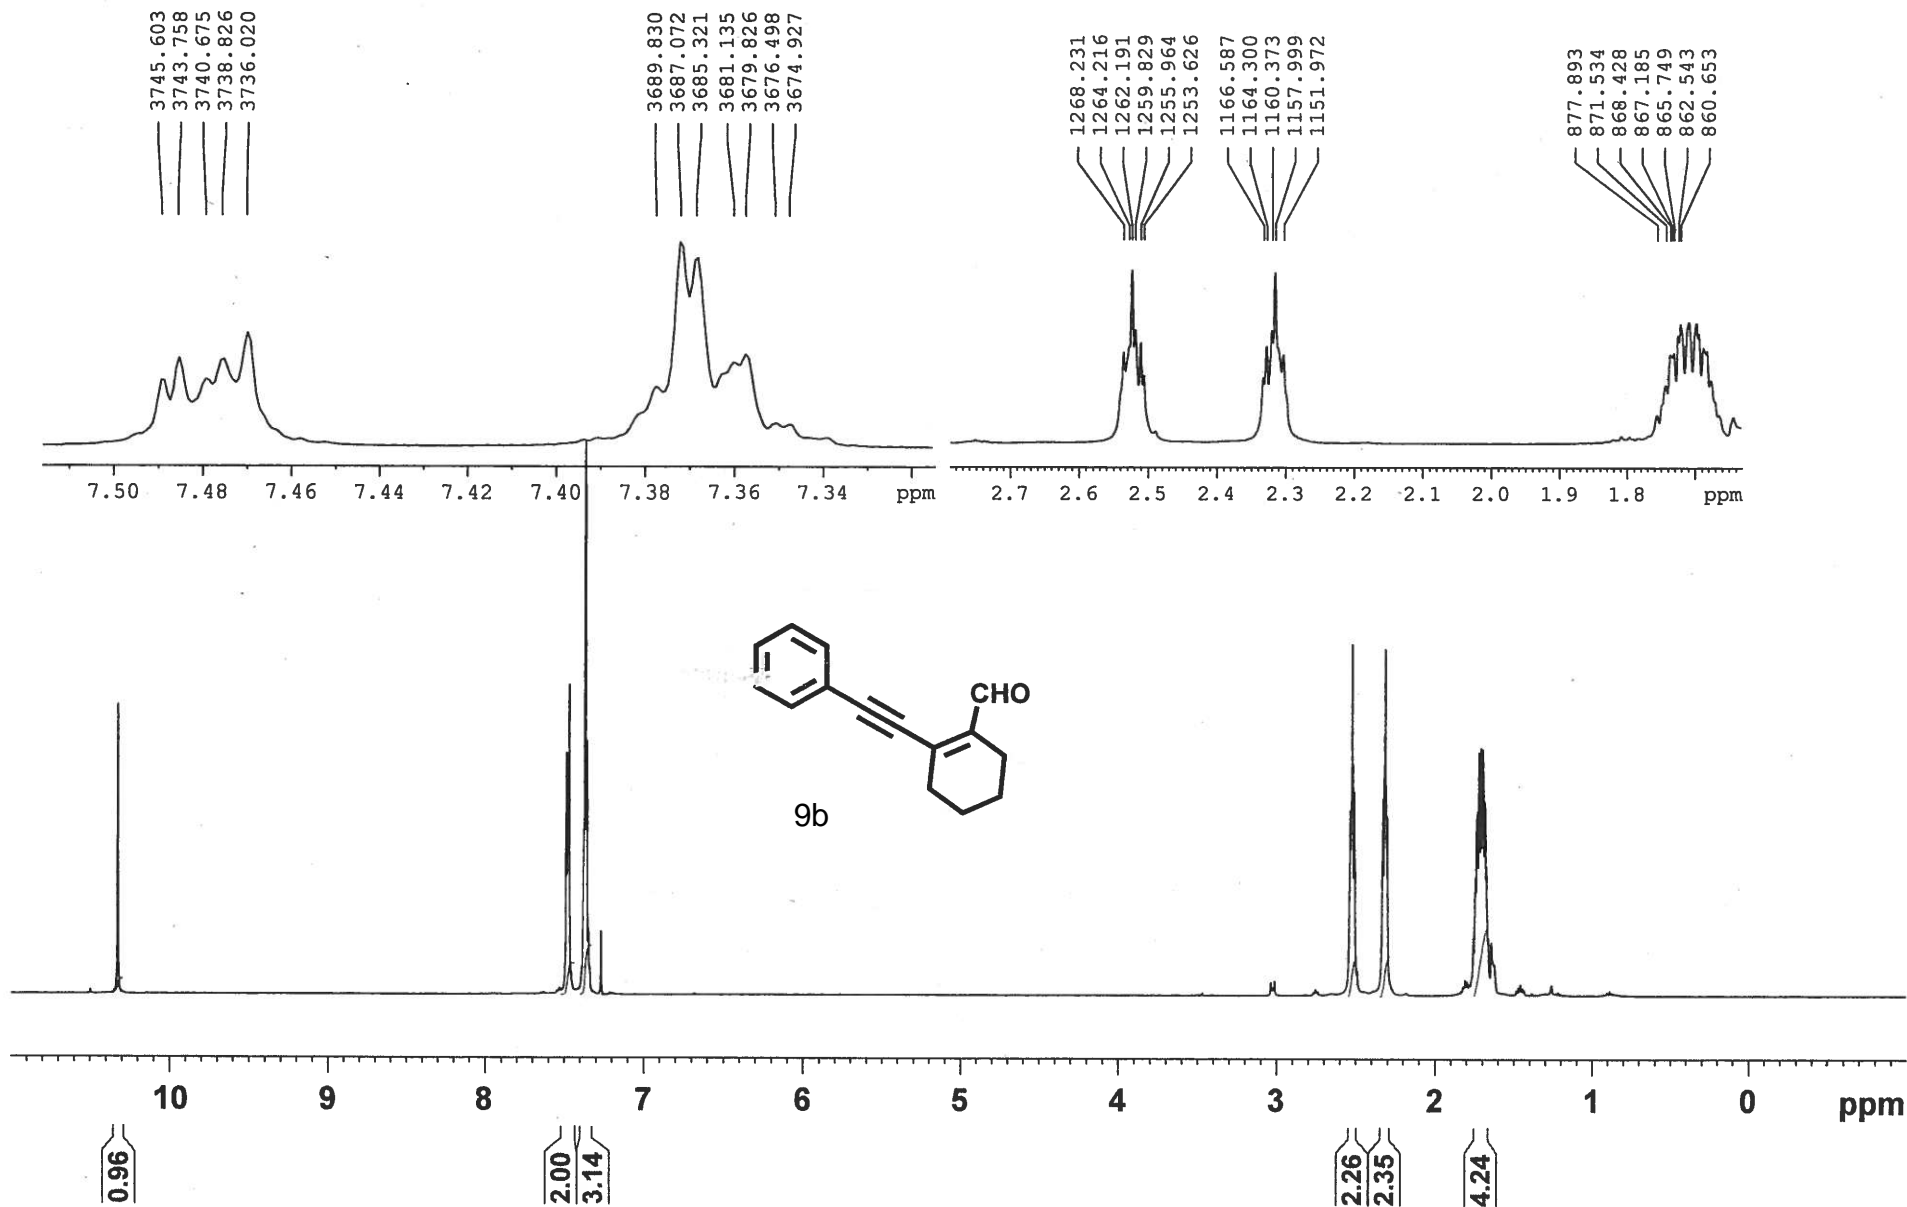

Phenyl-CC-Cyclohexenecarbaldehyde 13C

300 Ultra

Friday 21 May 2010

142.72  
140.11  
131.79  
129.23  
128.63  
122.43

98.66

86.40

77.59  
77.16  
76.75

32.47

22.43  
22.03  
21.19

193.018

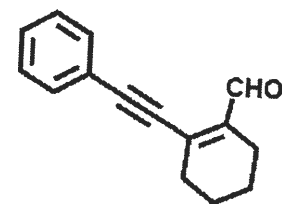

9b

220 200 180 160 140 120 100 80 60 40 20 0 33 ppm

Anisole 7.280  
 500 Experiment 3.270  
 21 May 2009 7.264  
 7.248  
 7.083  
 7.081  
 7.079  
 7.068  
 7.066  
 7.064  
 6.992  
 6.989  
 6.987  
 6.984  
 6.940  
 6.939  
 6.935  
 6.933  
 6.924  
 6.922  
 6.918  
 6.917  
 3.825  
 3.822  
 3.811  
 2.535  
 2.531  
 2.526  
 2.523  
 2.519  
 2.514  
 2.507  
 2.502  
 2.329  
 2.324  
 2.317  
 2.312  
 2.307  
 2.300  
 2.296  
 1.750  
 1.745  
 1.740  
 1.738  
 1.733  
 1.730  
 1.727  
 1.721  
 1.717  
 1.715  
 1.706

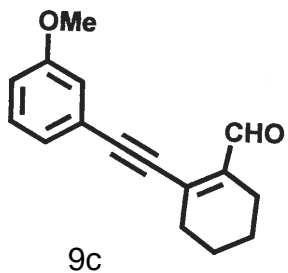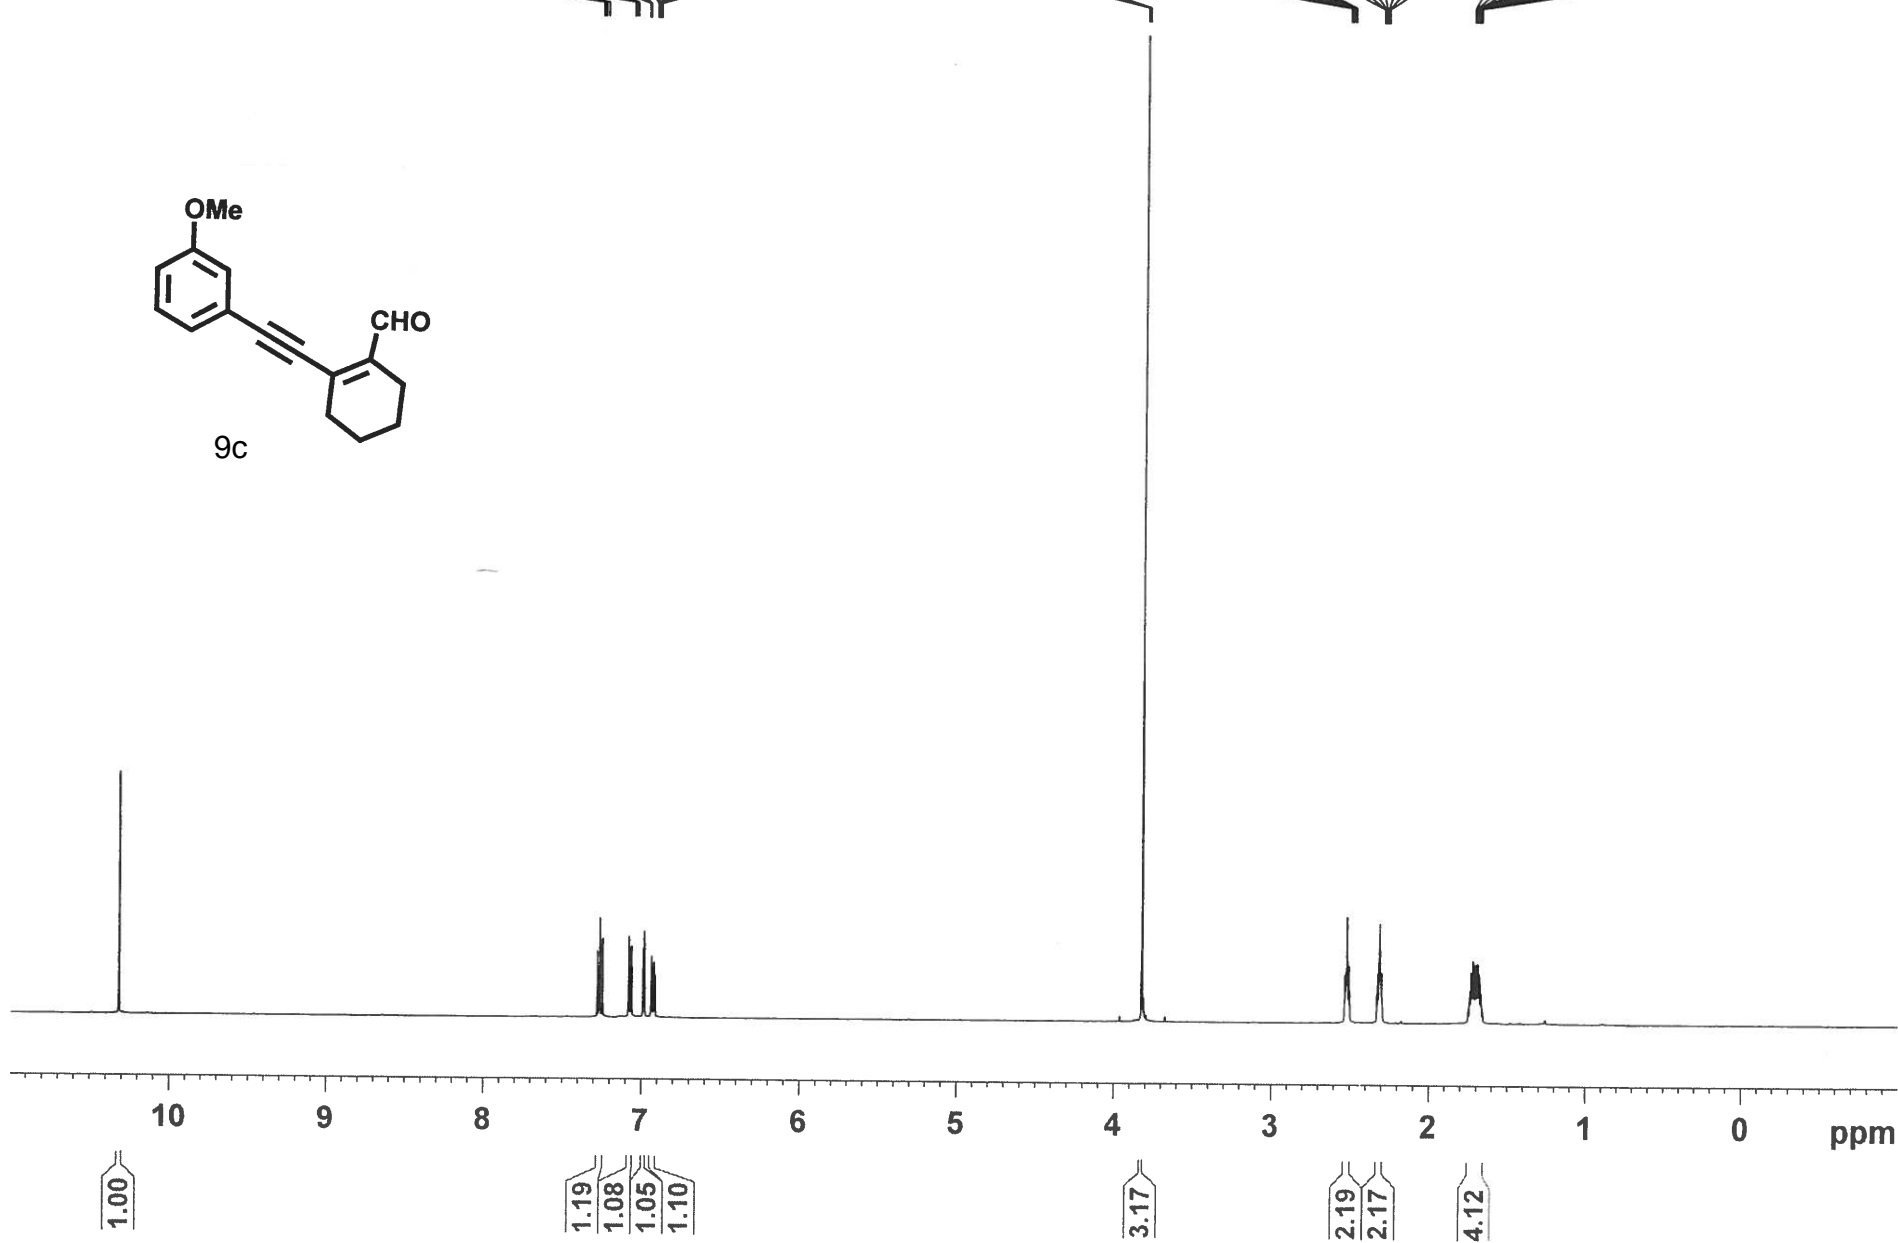

Anisole-3-CC-Cyclohexene Sonogoshira 13C Analysis

300 Ultra re 1

15 May 2009

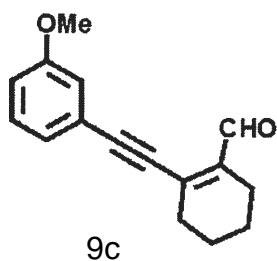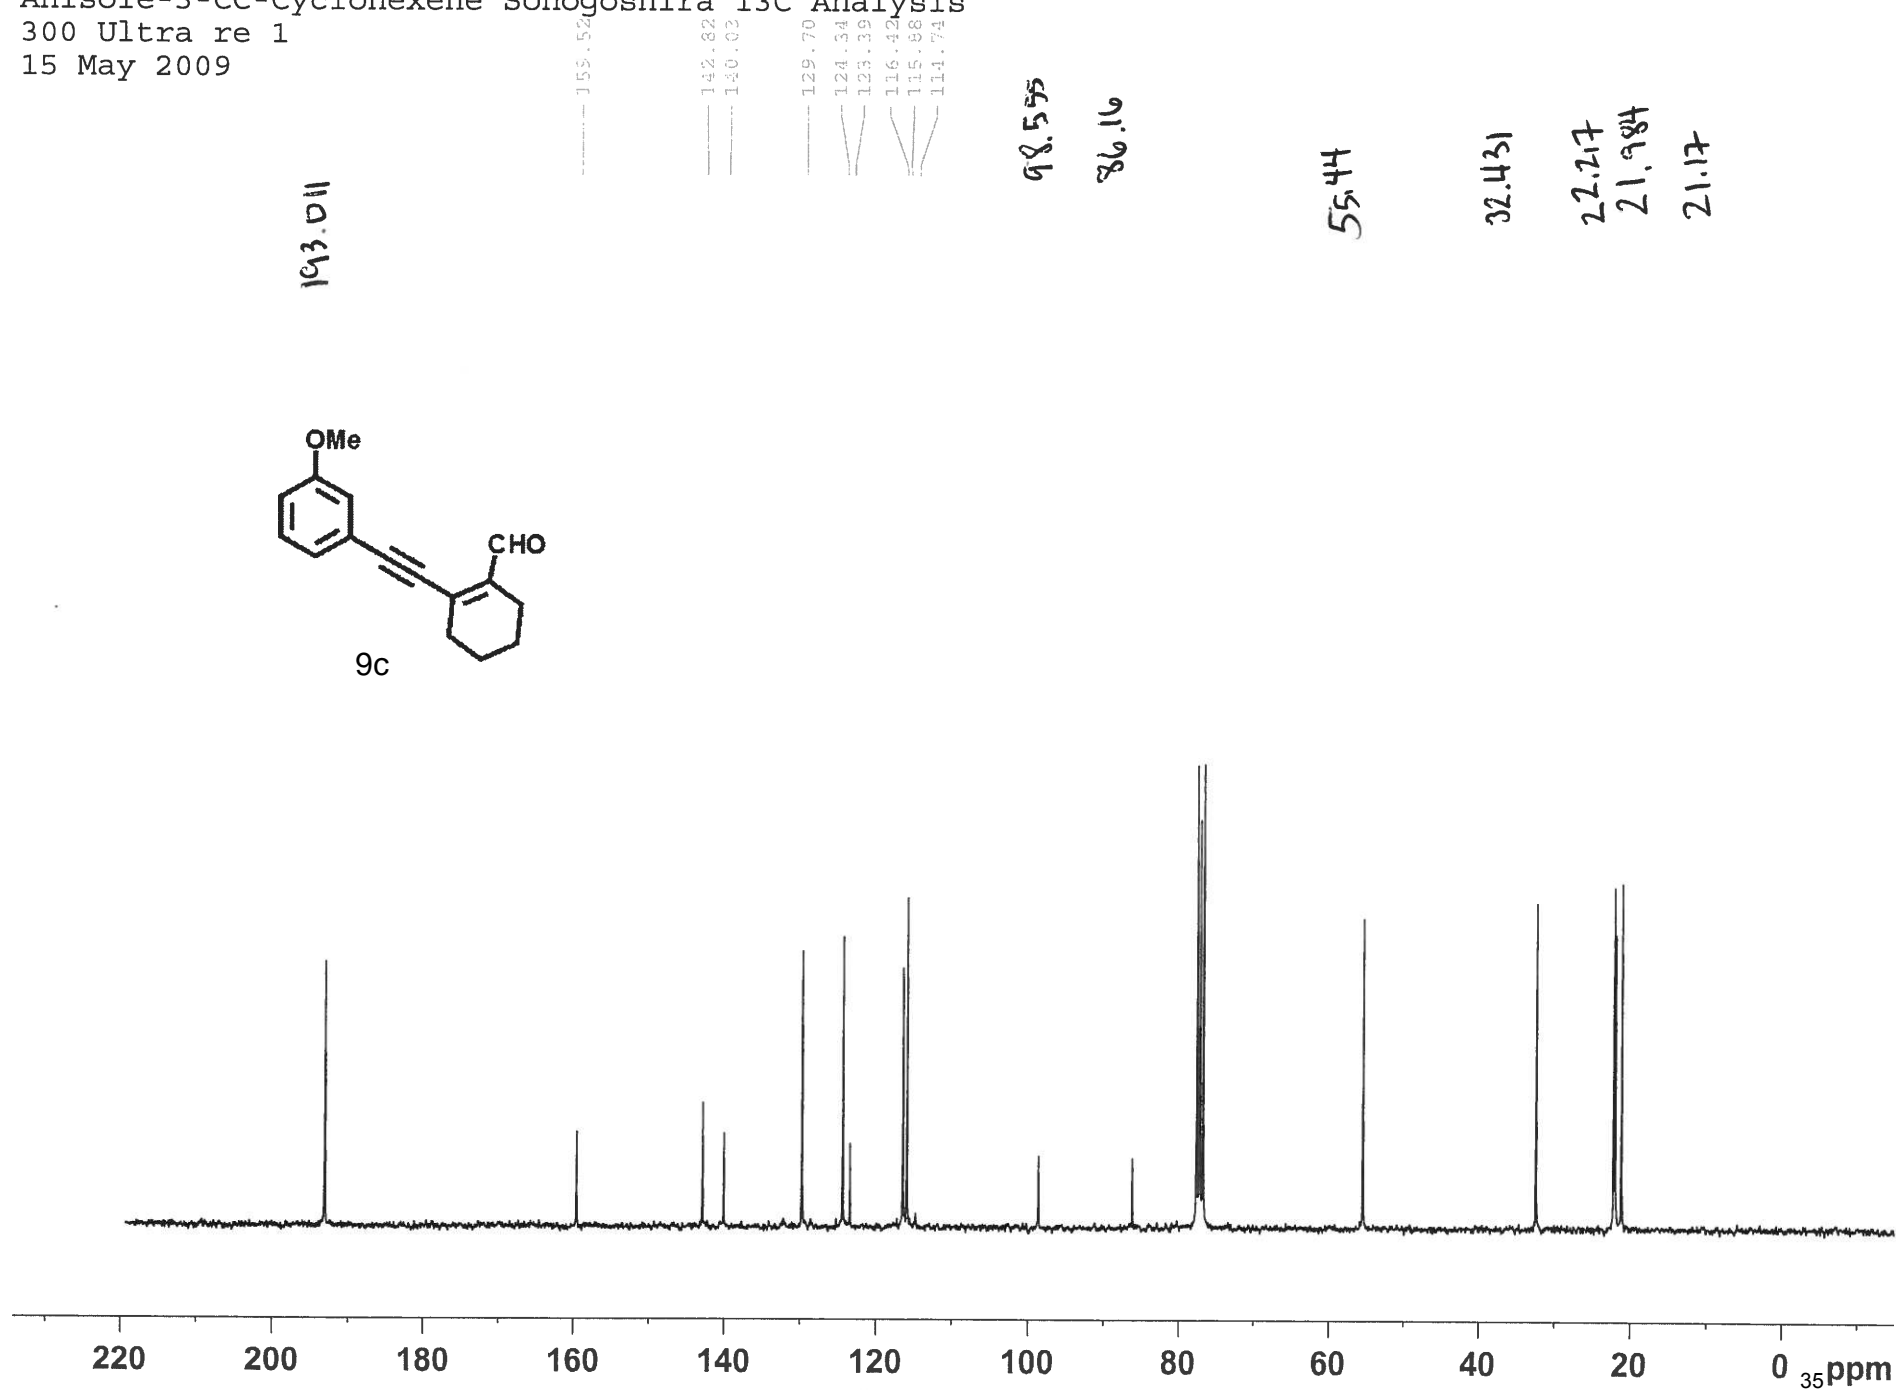

Dimethoxy-1,2-Cyclohexenealdehyde-4  
 500 Tpsin  
 16 February 2010

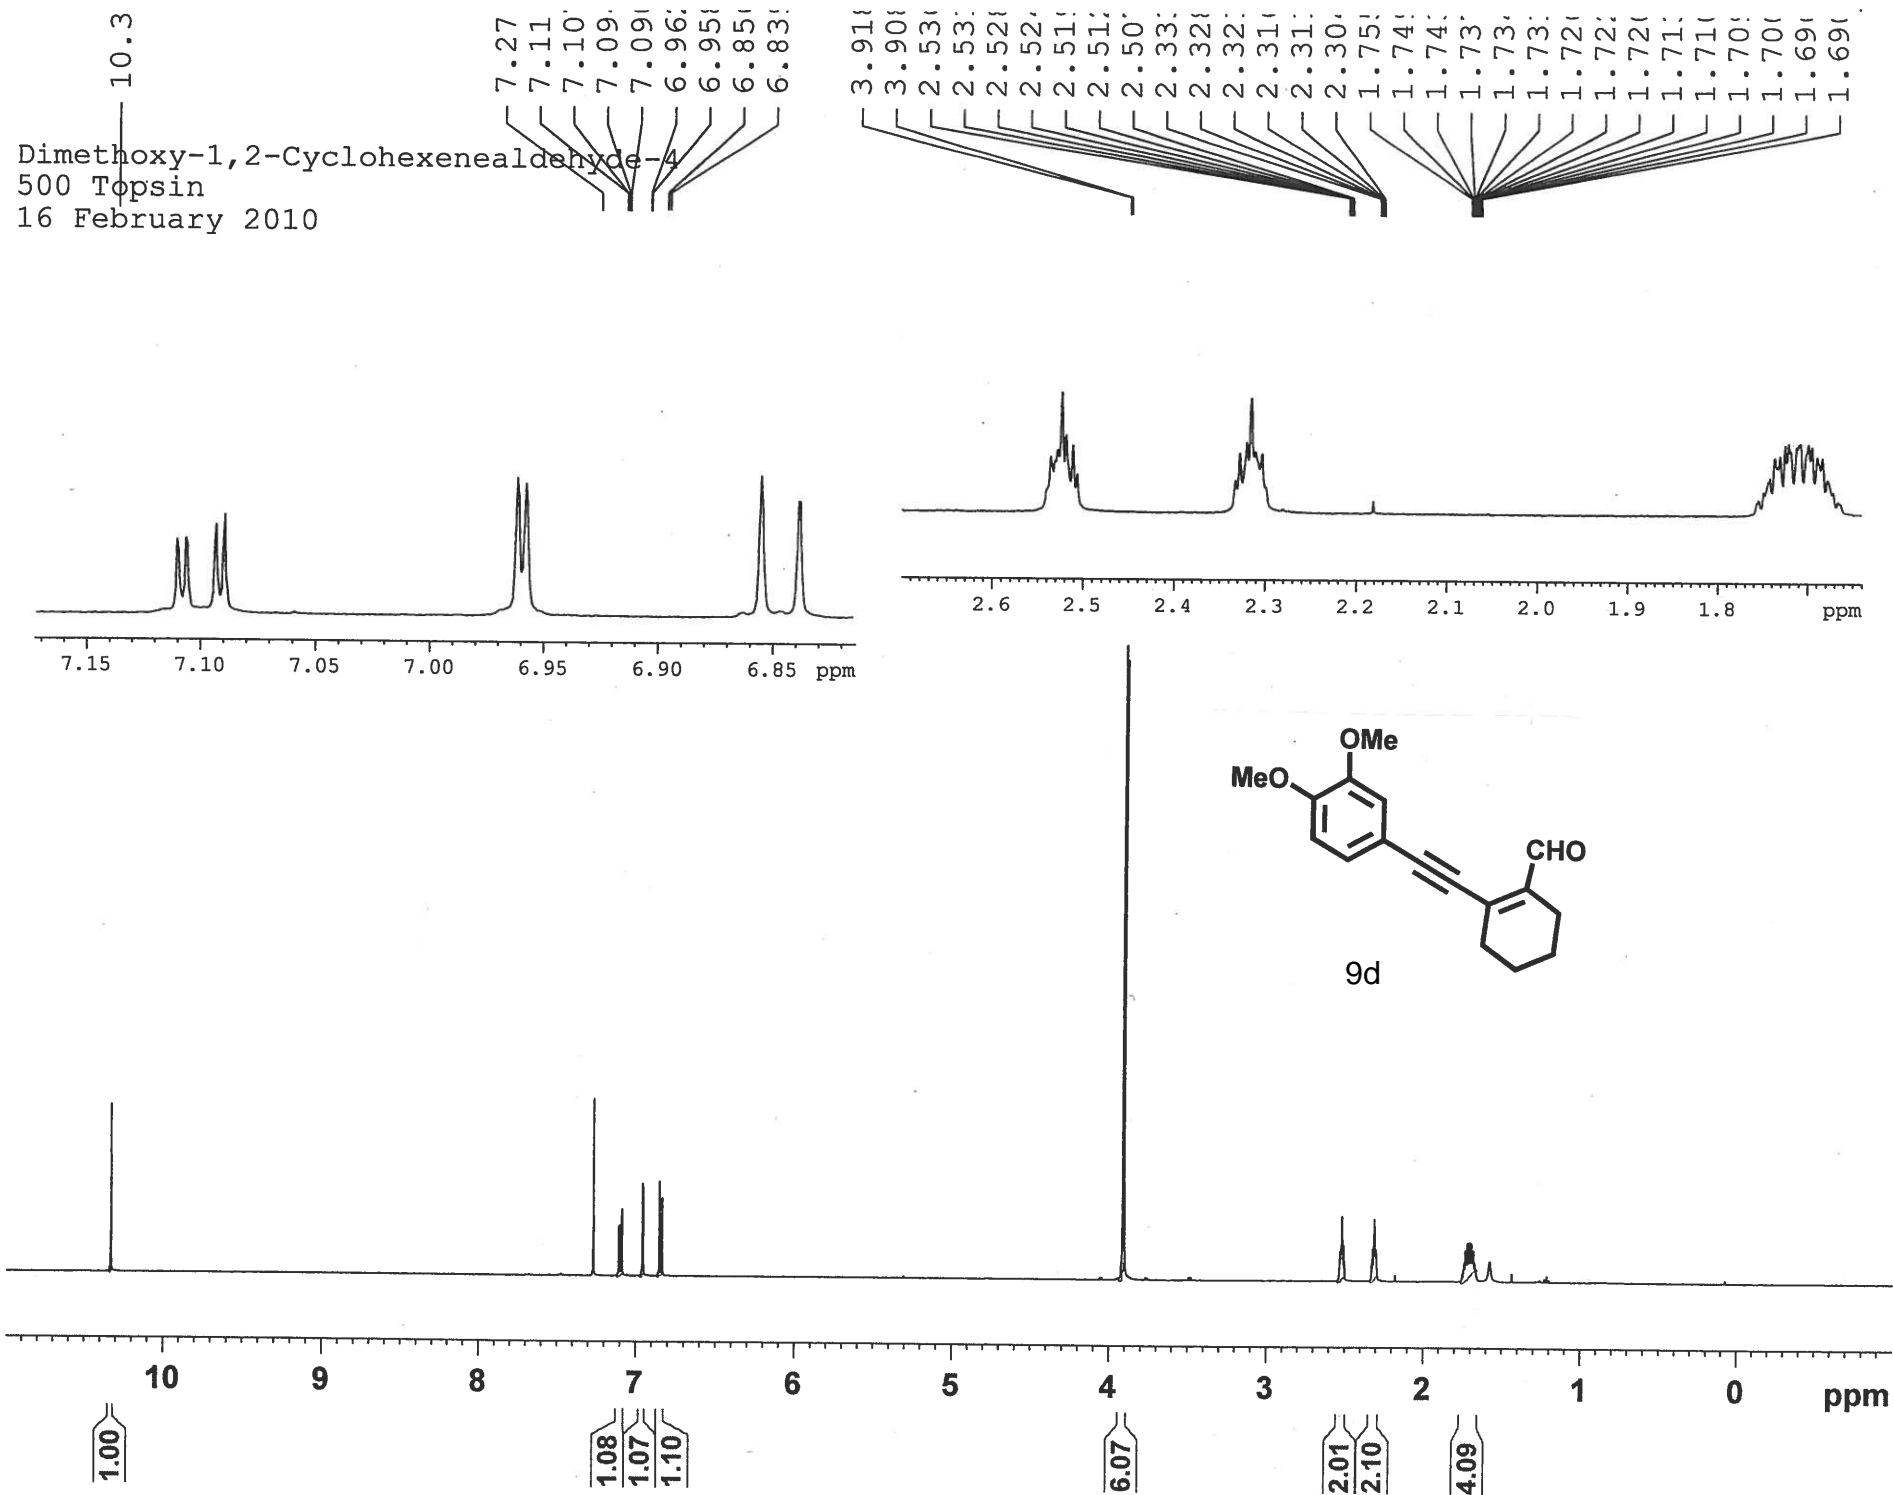



Hyde Dimethoxy-1,2-Cyclohexenecarbaldehyde-4 <sup>13</sup>C  
300 Ultra  
16 February 2010

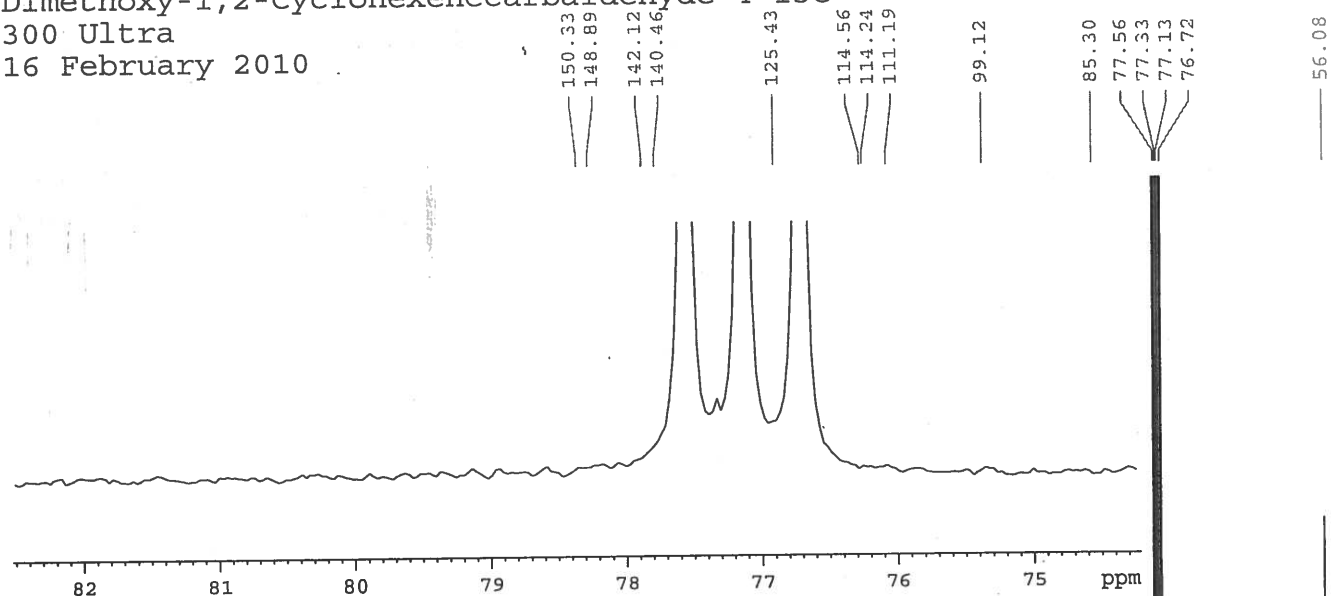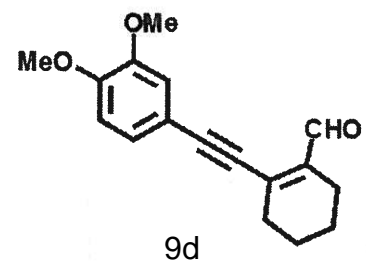

220 200 180 160 140 120 100 80 60 40 20 0<sub>37</sub> ppm

Dimethoxy-1,3-CyclopenteneCHO-  
 Experiment 1 300  
 Wednesday 16 November 2011

847.9233  
 840.449  
 832.612  
 804.225  
 796.708  
 789.062

7.270  
 6.640  
 6.633  
 6.502  
 6.495  
 6.487

615.603  
 607.941  
 600.307  
 592.758  
 585.074

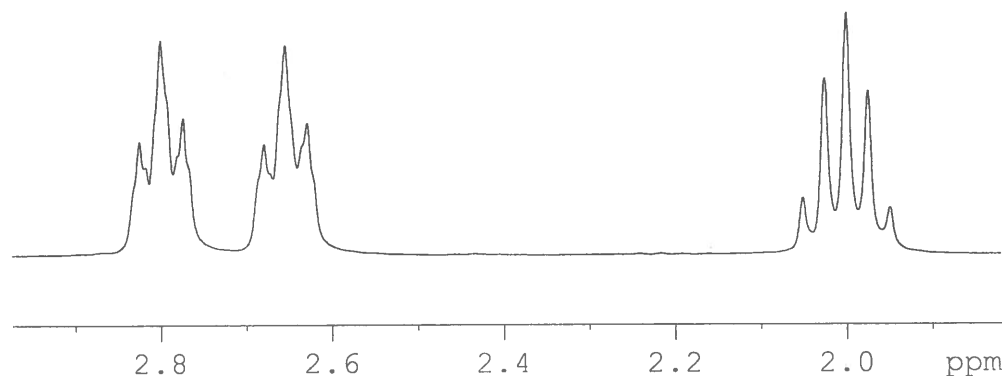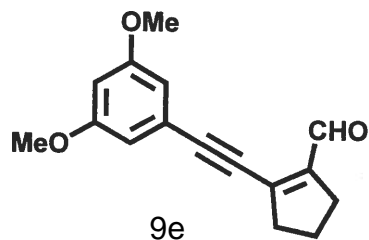

3.792  
 2.824  
 2.799  
 2.773  
 2.679  
 2.654  
 2.628  
 2.050  
 2.025  
 2.000  
 1.974  
 1.949

Current Data Parameters  
 NAME Dimethoxy-1,3-CyclopenteneCHO-  
 EXPNO 1  
 PROCNO 1  
 F2 - Acquisition Parameters  
 Date 20111116  
 Time 17.50  
 INSTRUM spect  
 PROBHD 5 mm BBO BB-1H  
 PULPROG zg30  
 TD 65536  
 SOLVENT CDCl3  
 NS 8  
 DS 2  
 SWH 6172.839 Hz  
 FIDRES 0.094190 Hz  
 AQ 5.3084660 sec  
 RG 143.7  
 DW 81.000 usec  
 DE 6.00 usec  
 TE 300.0 K  
 D1 1.00000000 sec  
 TD0 1

===== CHANNEL f1 =====  
 NS1 1  
 PS1 14.70 usec  
 PR1 0.00 dB  
 SF01 300.2318340 MHz  
 F2 - Processing parameters  
 EQ2 327.681 MHz  
 SF02 300.2309880 MHz  
 FWH 1.00 Hz  
 LE 0  
 GE 0  
 PC 1.00

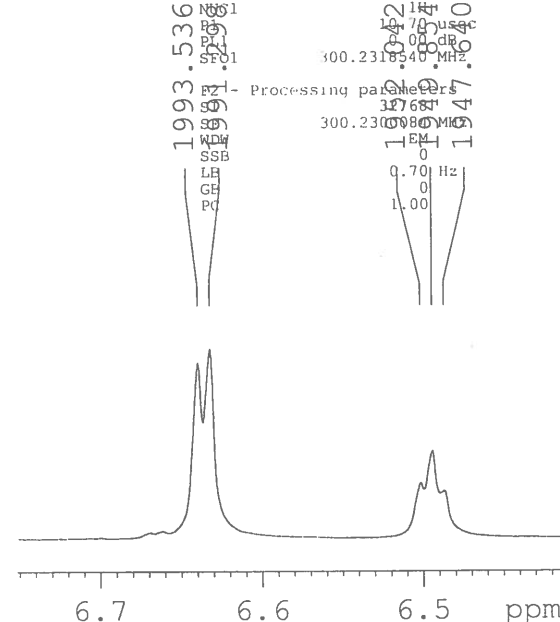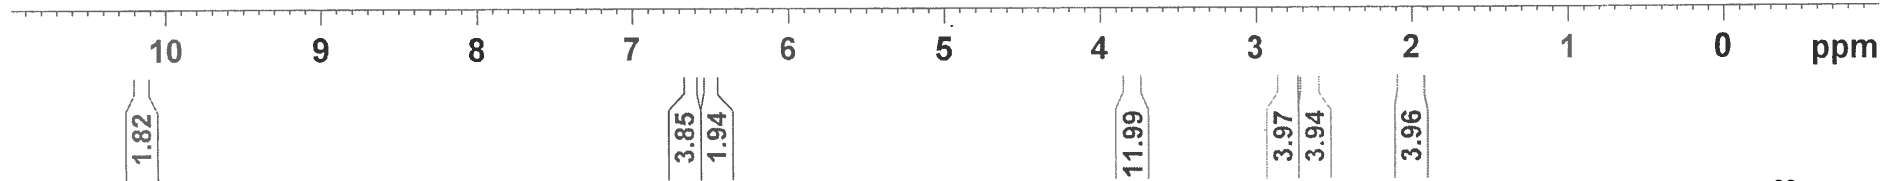

Dimethoxy-1,3-CyclopenteneCHO-5 13C  
 Experiment 1 300  
 Wednesday 16 November 2011

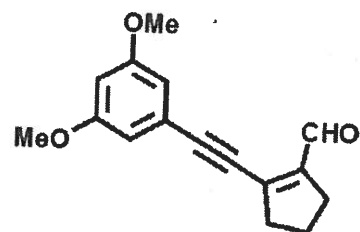

9e

Current Data Parameters  
 NAME Dimethoxy-1,3-CyclopenteneCHO-5 13C  
 EXPNO 1  
 PROCNO 1

F2 - Acquisition Parameters  
 Date\_ 20111116  
 Time\_ 17.12  
 INSTRUM spect  
 PROBHD 5 mm BBO BB-1H  
 PULPROG zgpg30  
 TD 16384  
 SOLVENT CDCl3  
 NS 181  
 DS 4  
 SWH 17985.611 Hz  
 FIDRES 1.037755 Hz  
 AQ 0.4555252 sec  
 RG 9195.2  
 DW 27.900 usec  
 DE 6.00 usec  
 TE 300.0 K  
 D1 1.00000000 sec  
 d11 0.03000000 sec  
 DELTA 0.89999998 sec  
 TDO 1

===== CHANNEL f1 =====  
 NUC1 13C  
 P1 15.90 usec  
 PL1 0.00 dB  
 SFO1 75.5004128 MHz

===== CHANNEL f2 =====  
 CPDPRG2 waltz16  
 NUC2 1H  
 PCPD2 70.00 usec  
 PL2 0.00 dB  
 PL12 16.31 dB  
 PL13 19.31 dB  
 SFO2 300.2323000 MHz

F2 - Processing parameters  
 SI 16384  
 SF 75.4928917 MHz  
 WDW EM  
 SSB 0  
 LB 2.00 Hz  
 GB 0  
 PC 1.40

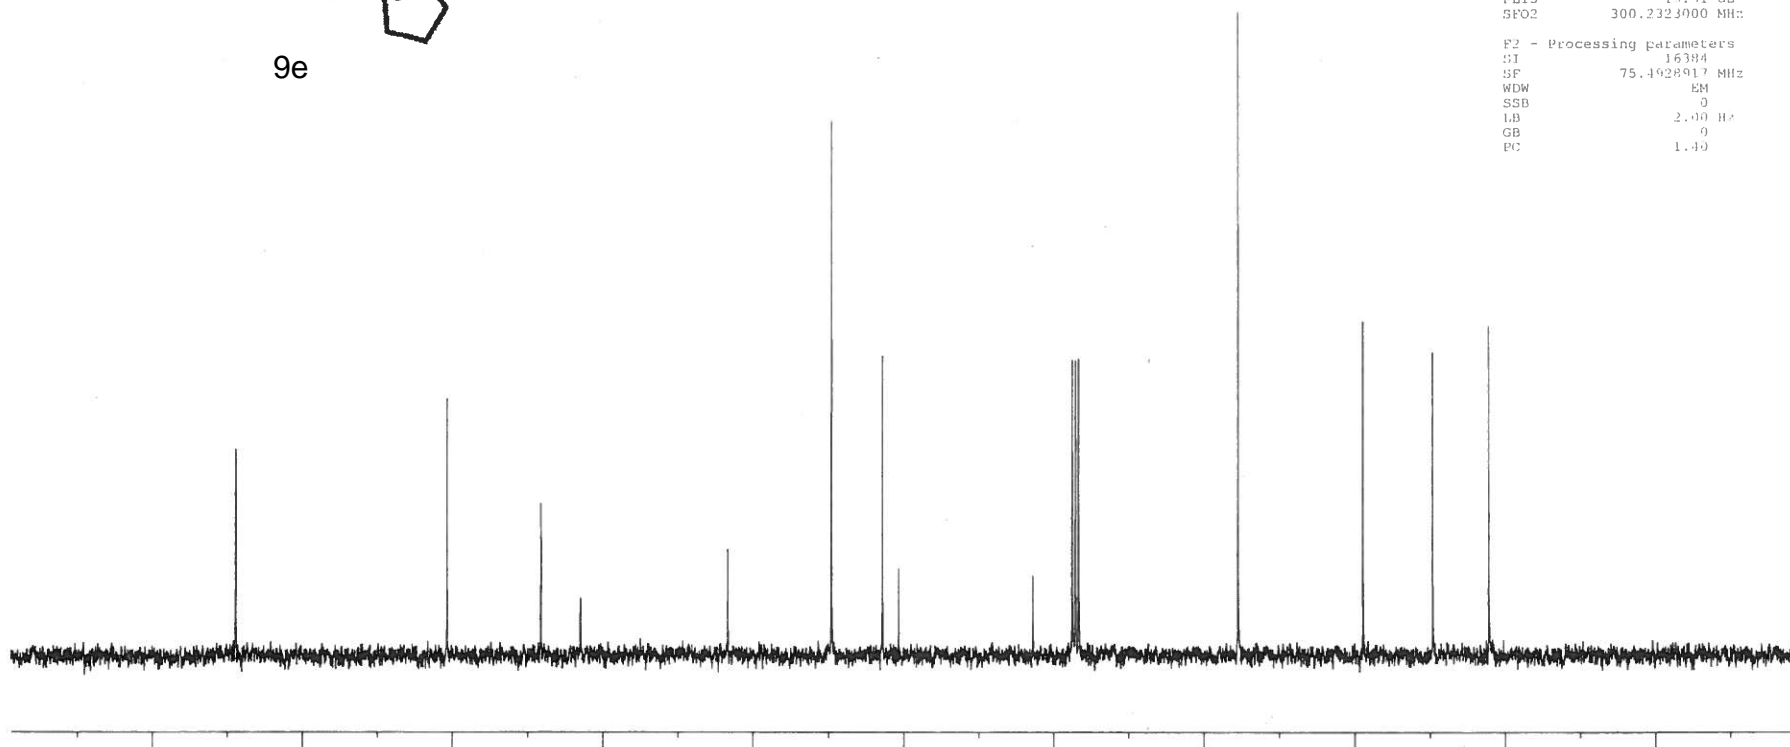

1255.802  
1249.855  
1247.563  
1243.586  
1241.493  
10.297

Dimethoxy-1,3-CC-CyclohexeneCHO-5

Topspin 500

Experiment 3

Tuesday 12 April 2011

1153.639  
1147.344  
1141.404

6.607  
6.602  
6.479  
6.474  
6.470

867.039  
860.835  
857.357  
851.409  
849.742  
844.113  
838.332  
833.079

3.783  
2.511  
2.499  
2.494  
2.486  
2.482  
2.307  
2.294  
2.282  
1.734  
1.721  
1.714  
1.702  
1.699  
1.688  
1.676  
1.666  
1.655  
1.643

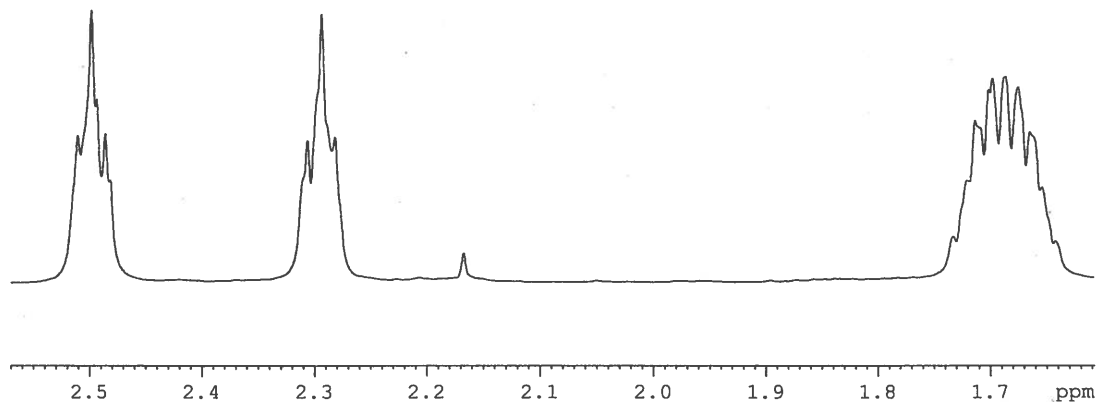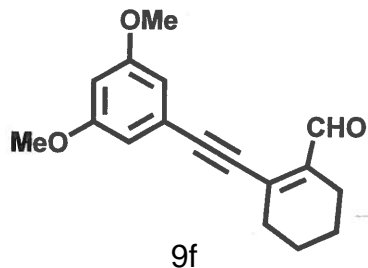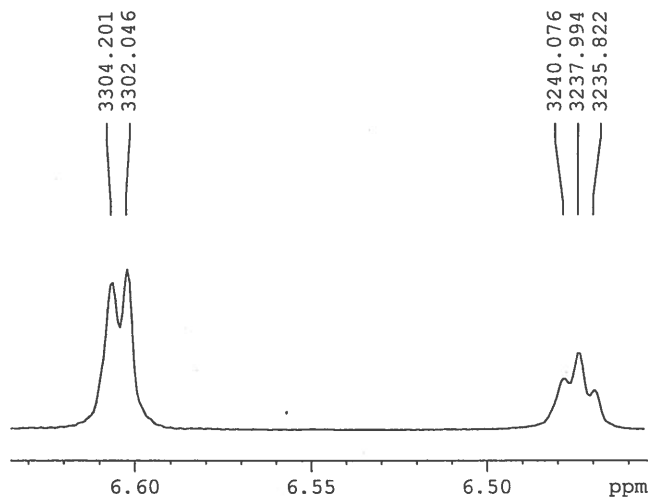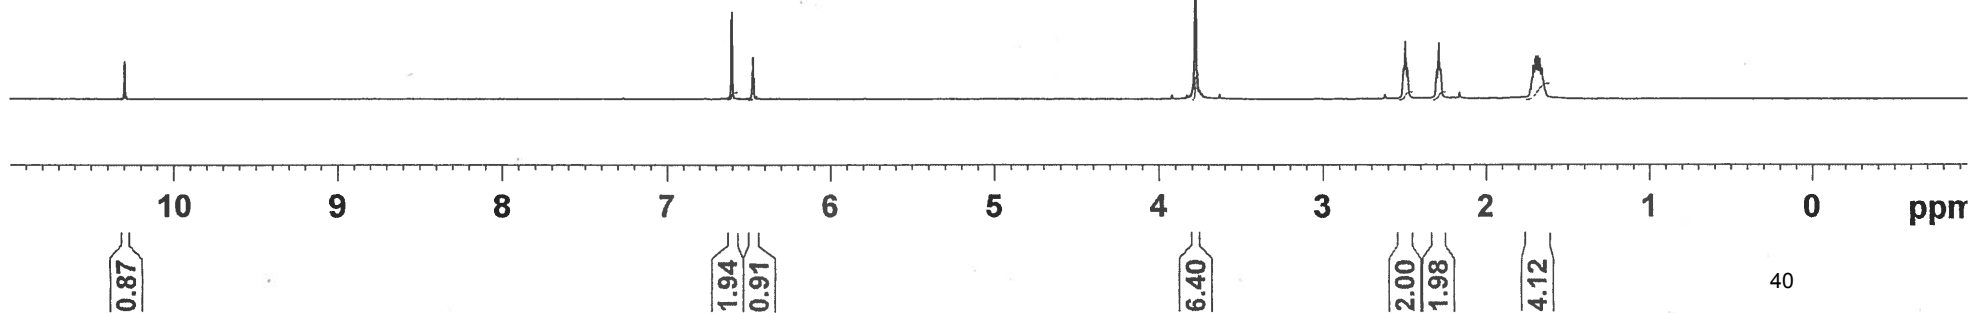

Current Data Parameters  
NAME Dimethoxy-1,3-CC-CyclohexeneCHO-5  
EXPNO 3  
PROCNO 1

F2 - Acquisition Parameters  
Date\_ 20110407  
Time\_ 16.33  
INSTRUM spect  
PROBHD 5 mm PABBO BB/  
PULPROG zgpg30  
TD 32768  
SOLVENT C6D6  
NS 8  
DS 2  
SWH 10964.912 Hz  
FIDRES 0.334623 Hz  
AQ 1.4943165 sec  
RG 28.5  
DW 45.600 usec  
DE 6.50 usec  
TE 295.2 K  
D1 2.00000000 sec  
d12 0.00020000 sec  
D16 0.00020000 sec  
TD0 1

===== CHANNEL f1 =====  
NUC1 1H  
P1 14.80 usec  
p2 29.60 usec  
P12 2000.00 usec  
PL0 120.00 dB  
PL1 -1.40 dB  
SFO1 500.1305401 MHz  
SP1 35.19 dB  
SPNAM1 Squal100.1000  
SPOAL1 0.500  
SPOFFS1 0.00 Hz

===== GRADIENT CHANNEL =====  
GPNAM1 SINE.100  
GPNAM2 SINE.100  
GP21 31.00 %  
GP22 11.00 %  
P16 1000.00 usec

F2 - Processing parameters  
SI 32768  
SF 500.1300181 MHz  
WDW no  
SSB 0  
LB 0.00 Hz  
GB 0  
PC 1.00

Dimethoxy-1,3-CC-CyclohexeneCHO-5  
 sin 300 Ultra  
 sday 12 April 2011  
 Experiment 3

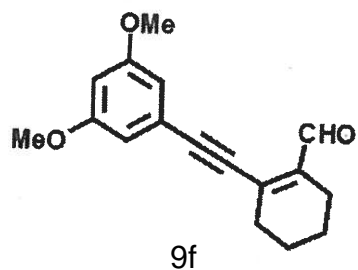

```

NAME      Dimethoxy-1,3-CC-CyclohexeneCHO-5
EXPNO     3
PROCNO    1
Date_     20110412
Time      16.21
INSTRUM    spect
PROBHD     5 mm PABBO BB-
PULPROG    zgpg30
TD         16384
SOLVENT    CDCl3
NS         264
DS         4
SWH        17985.611 Hz
FIDRES     1.097755 Hz
AQ         0.4555252 sec
RG         20642.5
DW         27.800 usec
DE         6.00 usec
TE         296.8 K
D1         1.00000000 sec
D11        0.03000000 sec
TDO        1
  
```

```

===== CHANNEL f1 =====
NUC1      13C
P1        11.25 usec
PL1       0.00 dB
SFO1      75.4752953 MHz
  
```

```

===== CHANNEL f2 =====
CPDPRG2   waltz16
NUC2      1H
PCPD2     80.00 usec
PL2       0.00 dB
PL12      16.55 dB
PL13      24.00 dB
SFO2      300.1312005 MHz
SI         8192
SF        75.4677423 MHz
WDW        EM
SSB        0
LB         2.50 Hz
GB         0
PC         1.40
  
```

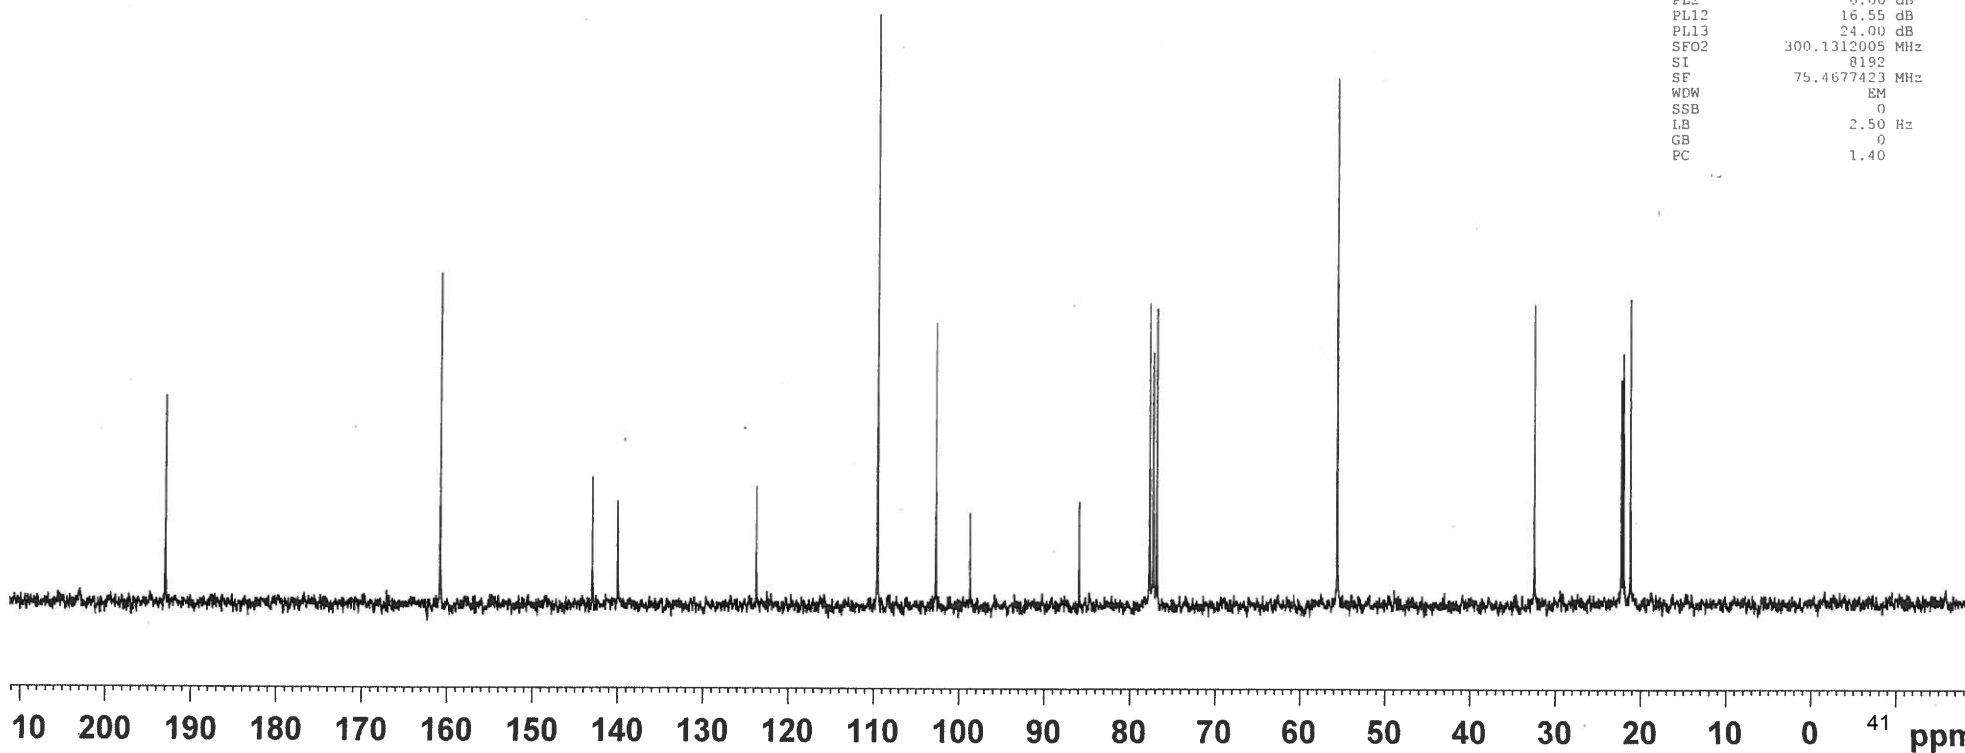

Dimethoxy-1,4-Cyclopentenecarbaldehyde-2  
 Topsin 500  
 Experiment 2  
 Thursday 26 August 2010

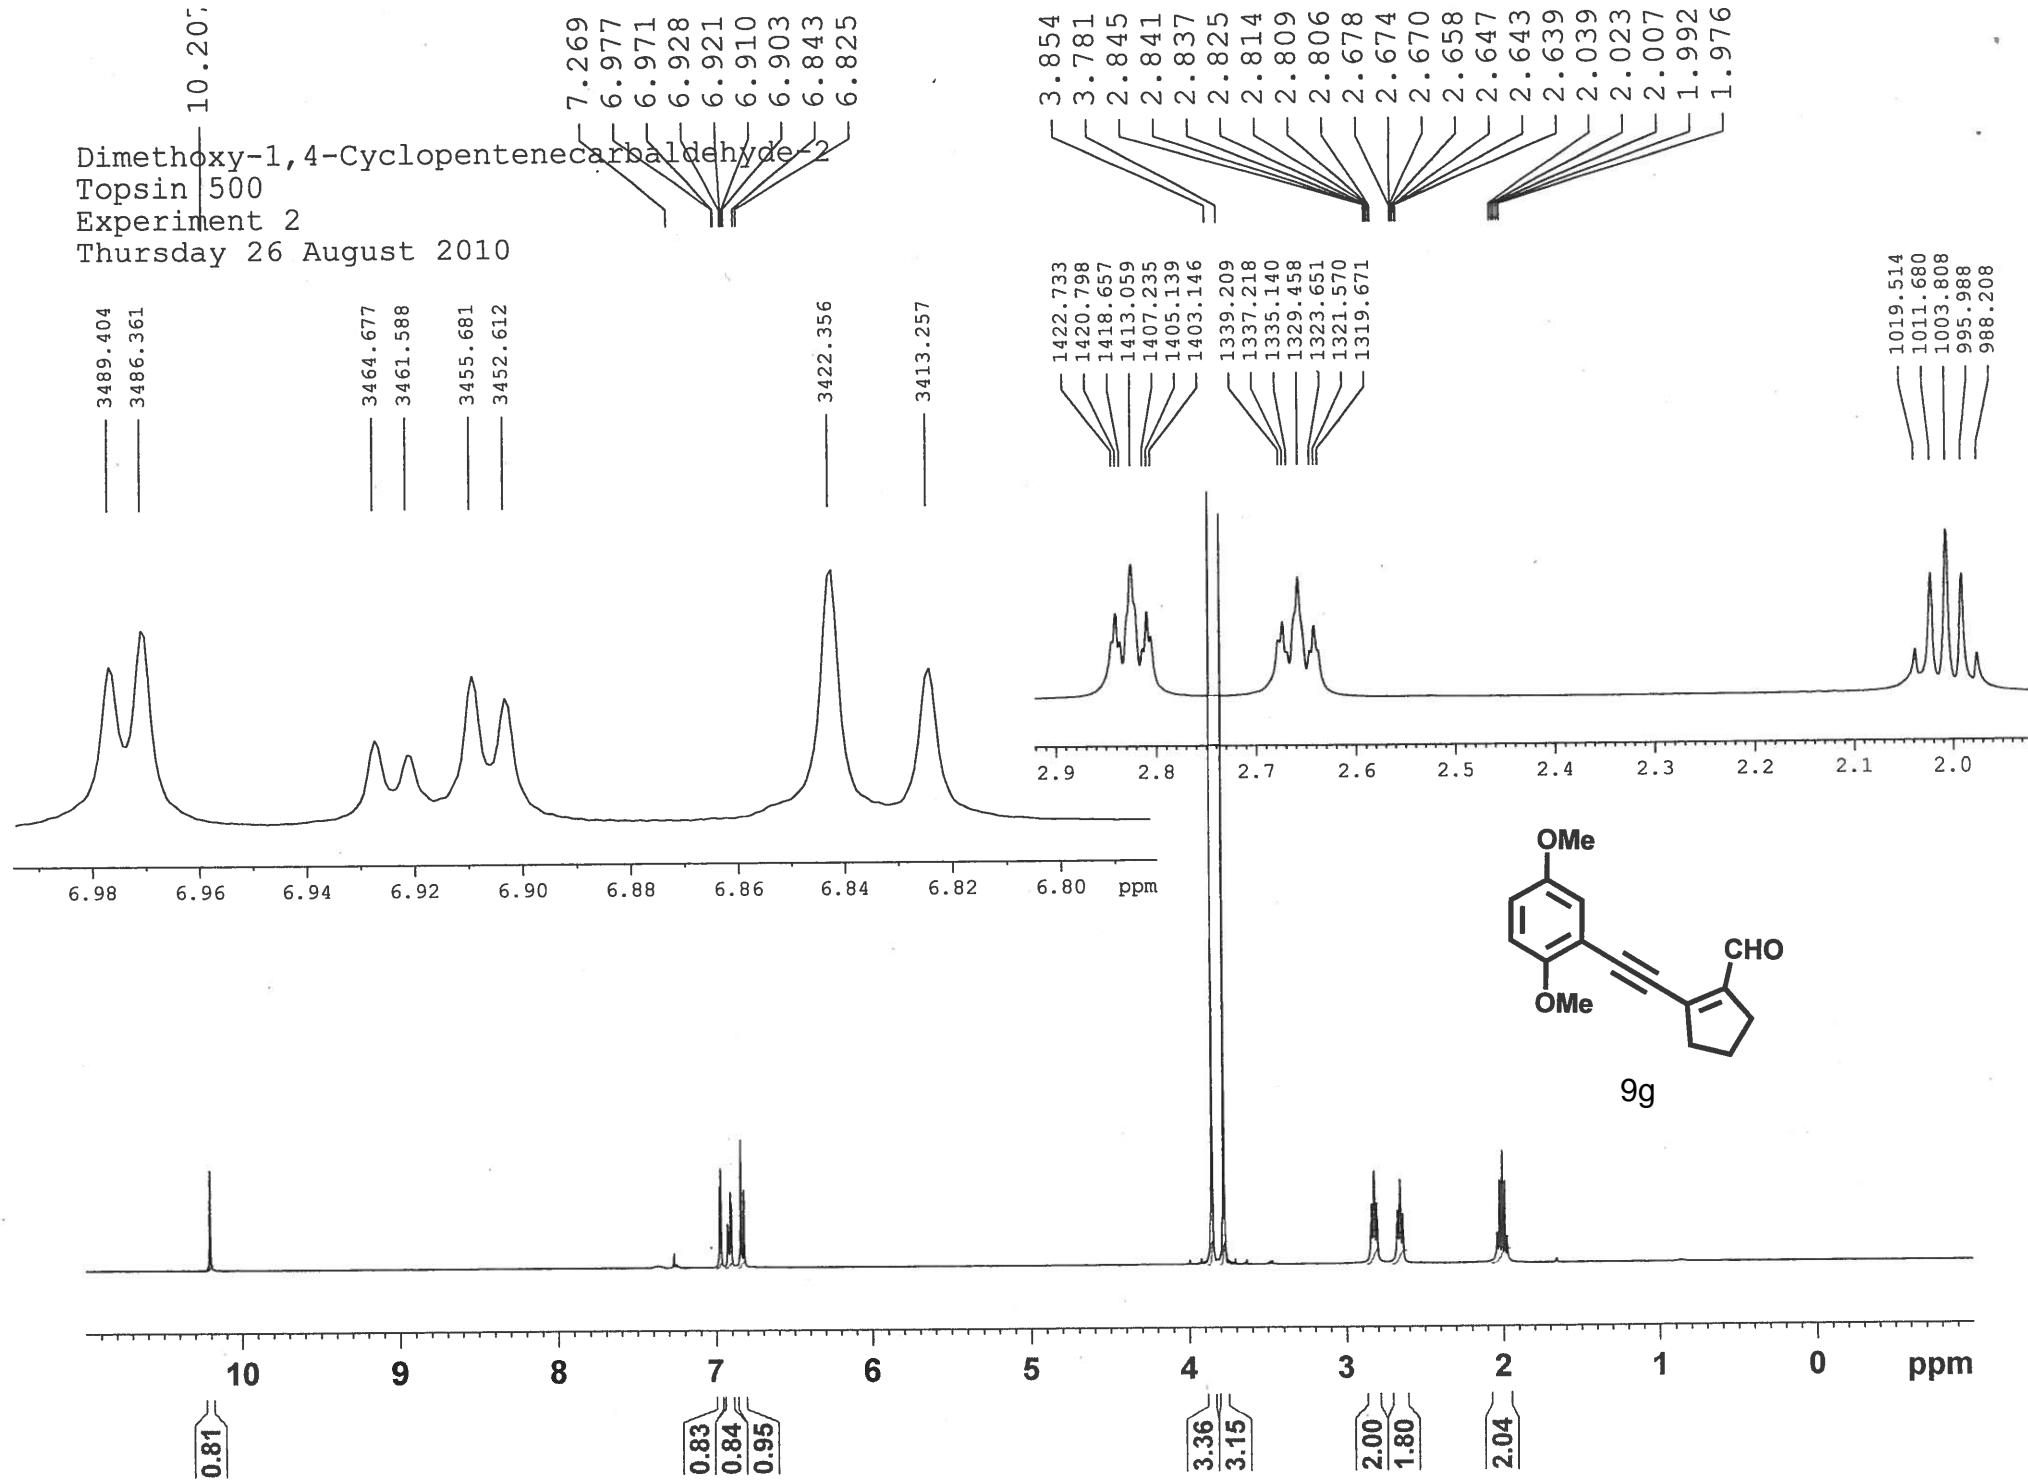

Dimethoxy-1,4-CC-Cyclopentenecarbaldehyde-2 <sup>13</sup>C

Ultra 300, Experiment 2

Thursday 26 August 2010

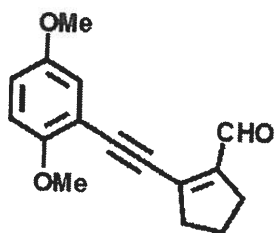

9g

189.64

155.99  
153.29  
148.06  
143.54

117.92  
117.27  
112.12  
111.78

97.37

87.53

77.59  
77.16  
76.74

56.50  
55.56

38.91

29.71

22.35

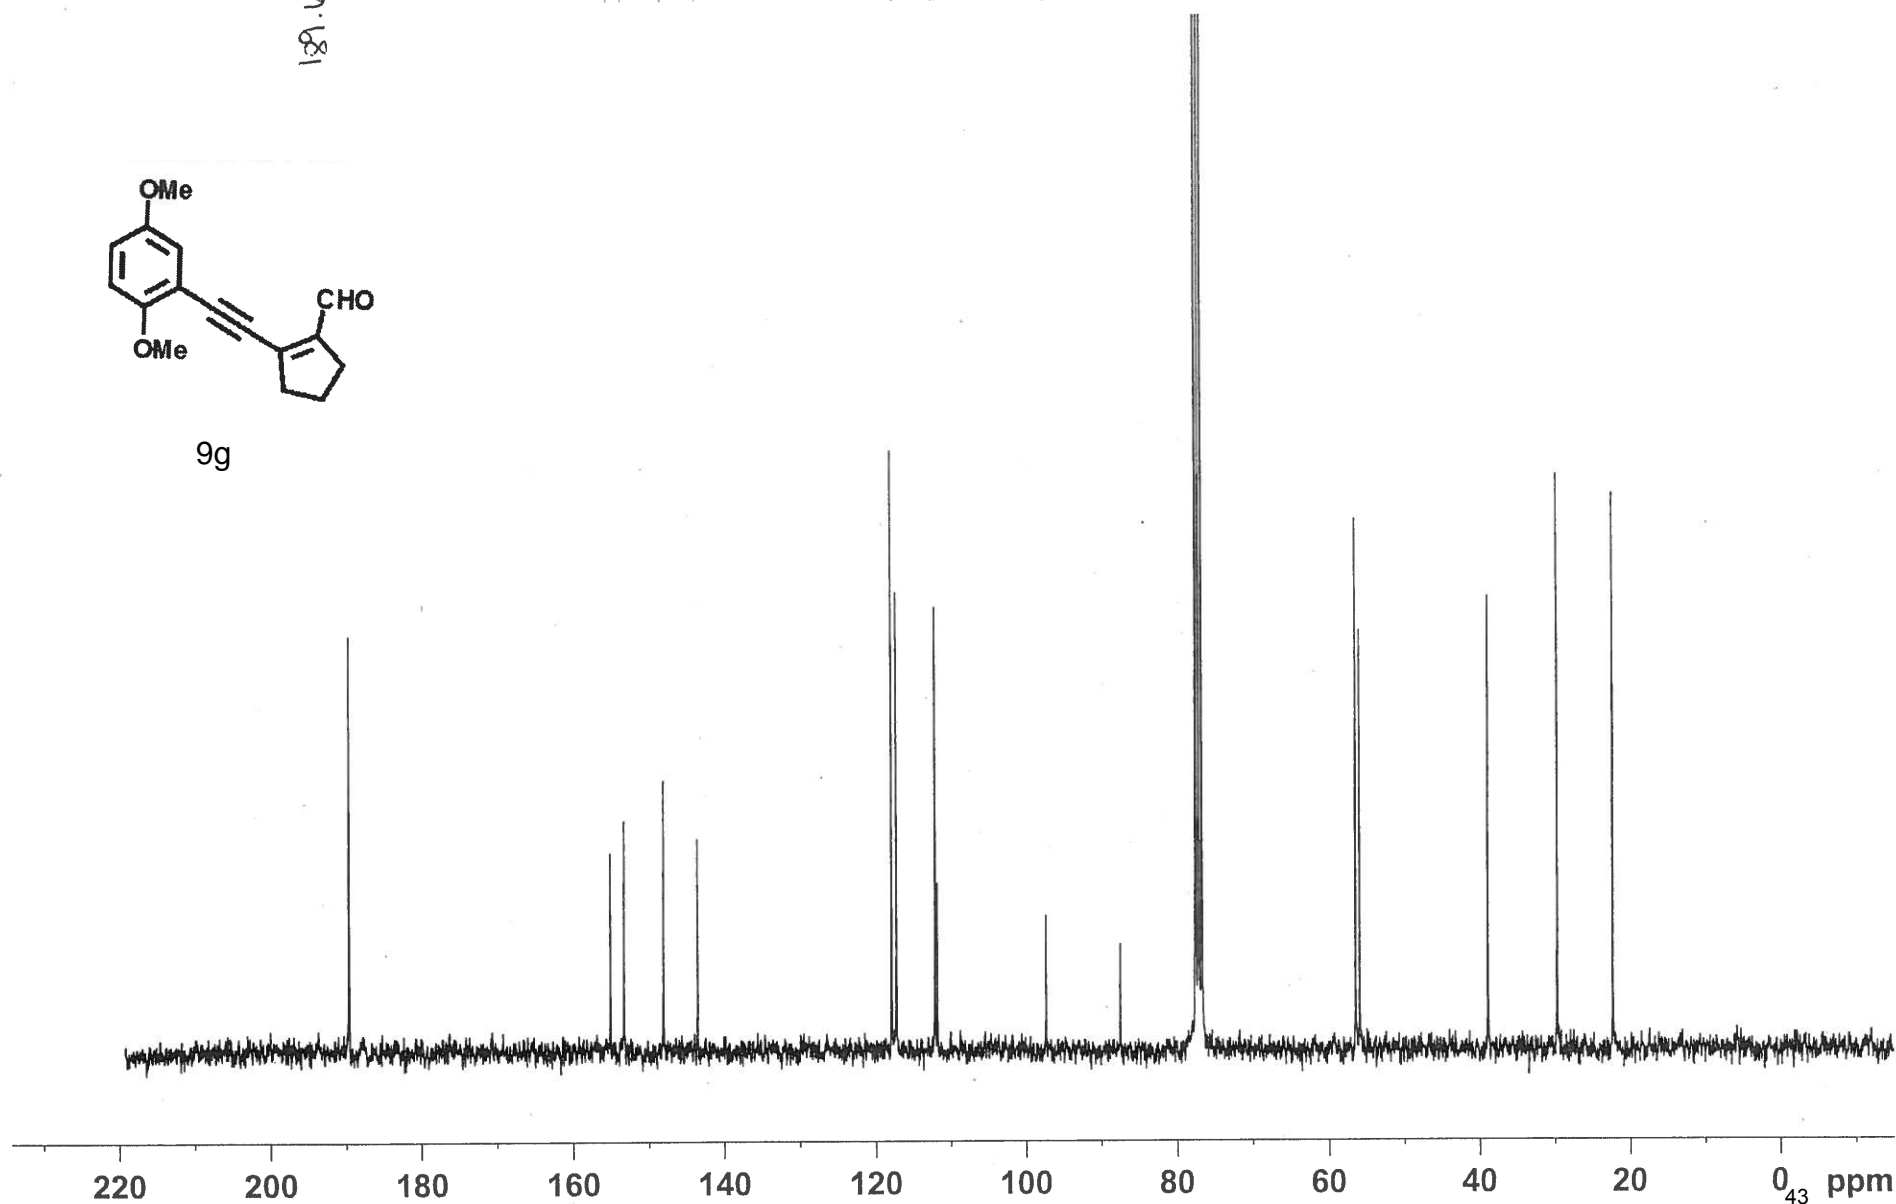

Dimethoxy-1,4-Cyclohexenecarbaldehyde-2  
 500 Topspin Experiment 2  
 5 March 2010

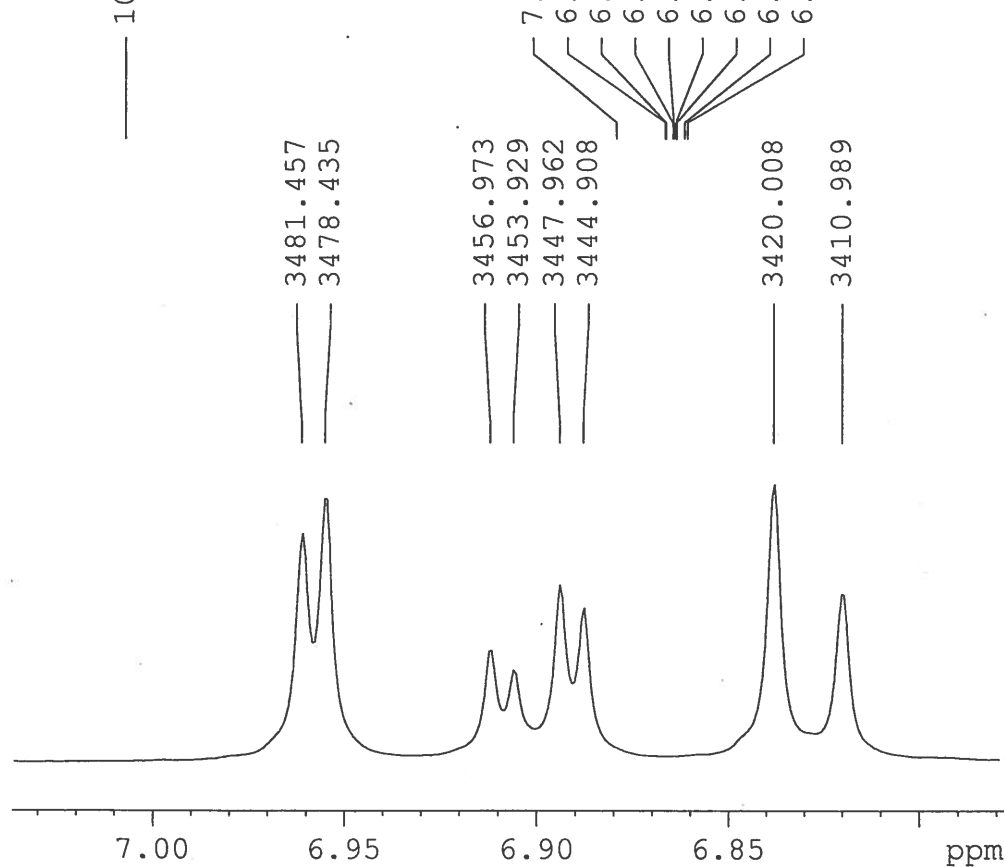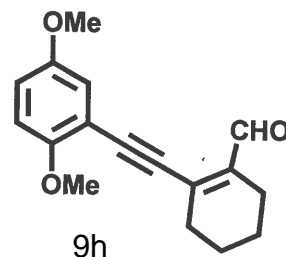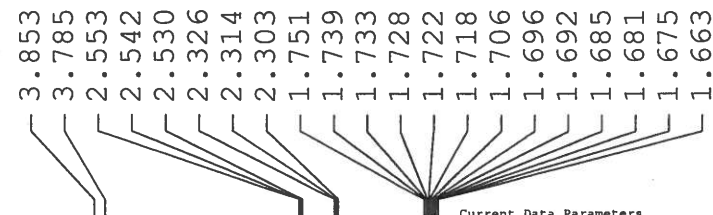

Current Data Parameters  
 NAME Dimethoxy-1,4-Cyclohexenecarbaldehyde-2  
 EXPNO 2  
 PROCNO 1

F2 - Acquisition Parameters  
 Date\_ 20100305  
 Time 14.36  
 INSTRUM spect  
 PROBHD 5 mm PABBO BB/  
 PULPROG zg30  
 TD 65536  
 SOLVENT CDCl3  
 NS 8  
 DS 2  
 SWH 10330.578 Hz  
 FIDRES 0.157632 Hz  
 AQ 3.1719923 sec  
 RG 322.5  
 DW 48.400 usec  
 DE 6.50 usec  
 TE 297.2 K  
 D1 1.00000000 sec  
 TDO 1

===== CHANNEL f1 =====  
 NUC1 1H  
 P1 14.80 usec  
 PL1 -1.40 dB  
 SFO1 500.130880 MHz

F2 - Processing parameters  
 SI 32768  
 SF 500.1300183 MHz  
 WDM B4  
 SSB 0  
 LB 0.70 Hz  
 GB 0  
 PC 1.00



Dimethoxy-1,4-Cyclohexenecarbaldehyde-2 <sup>13</sup>C  
 300 Ultra Experiment 2  
 23 May 2009

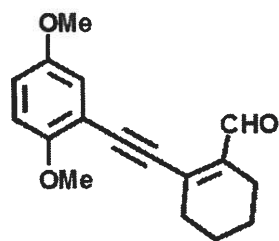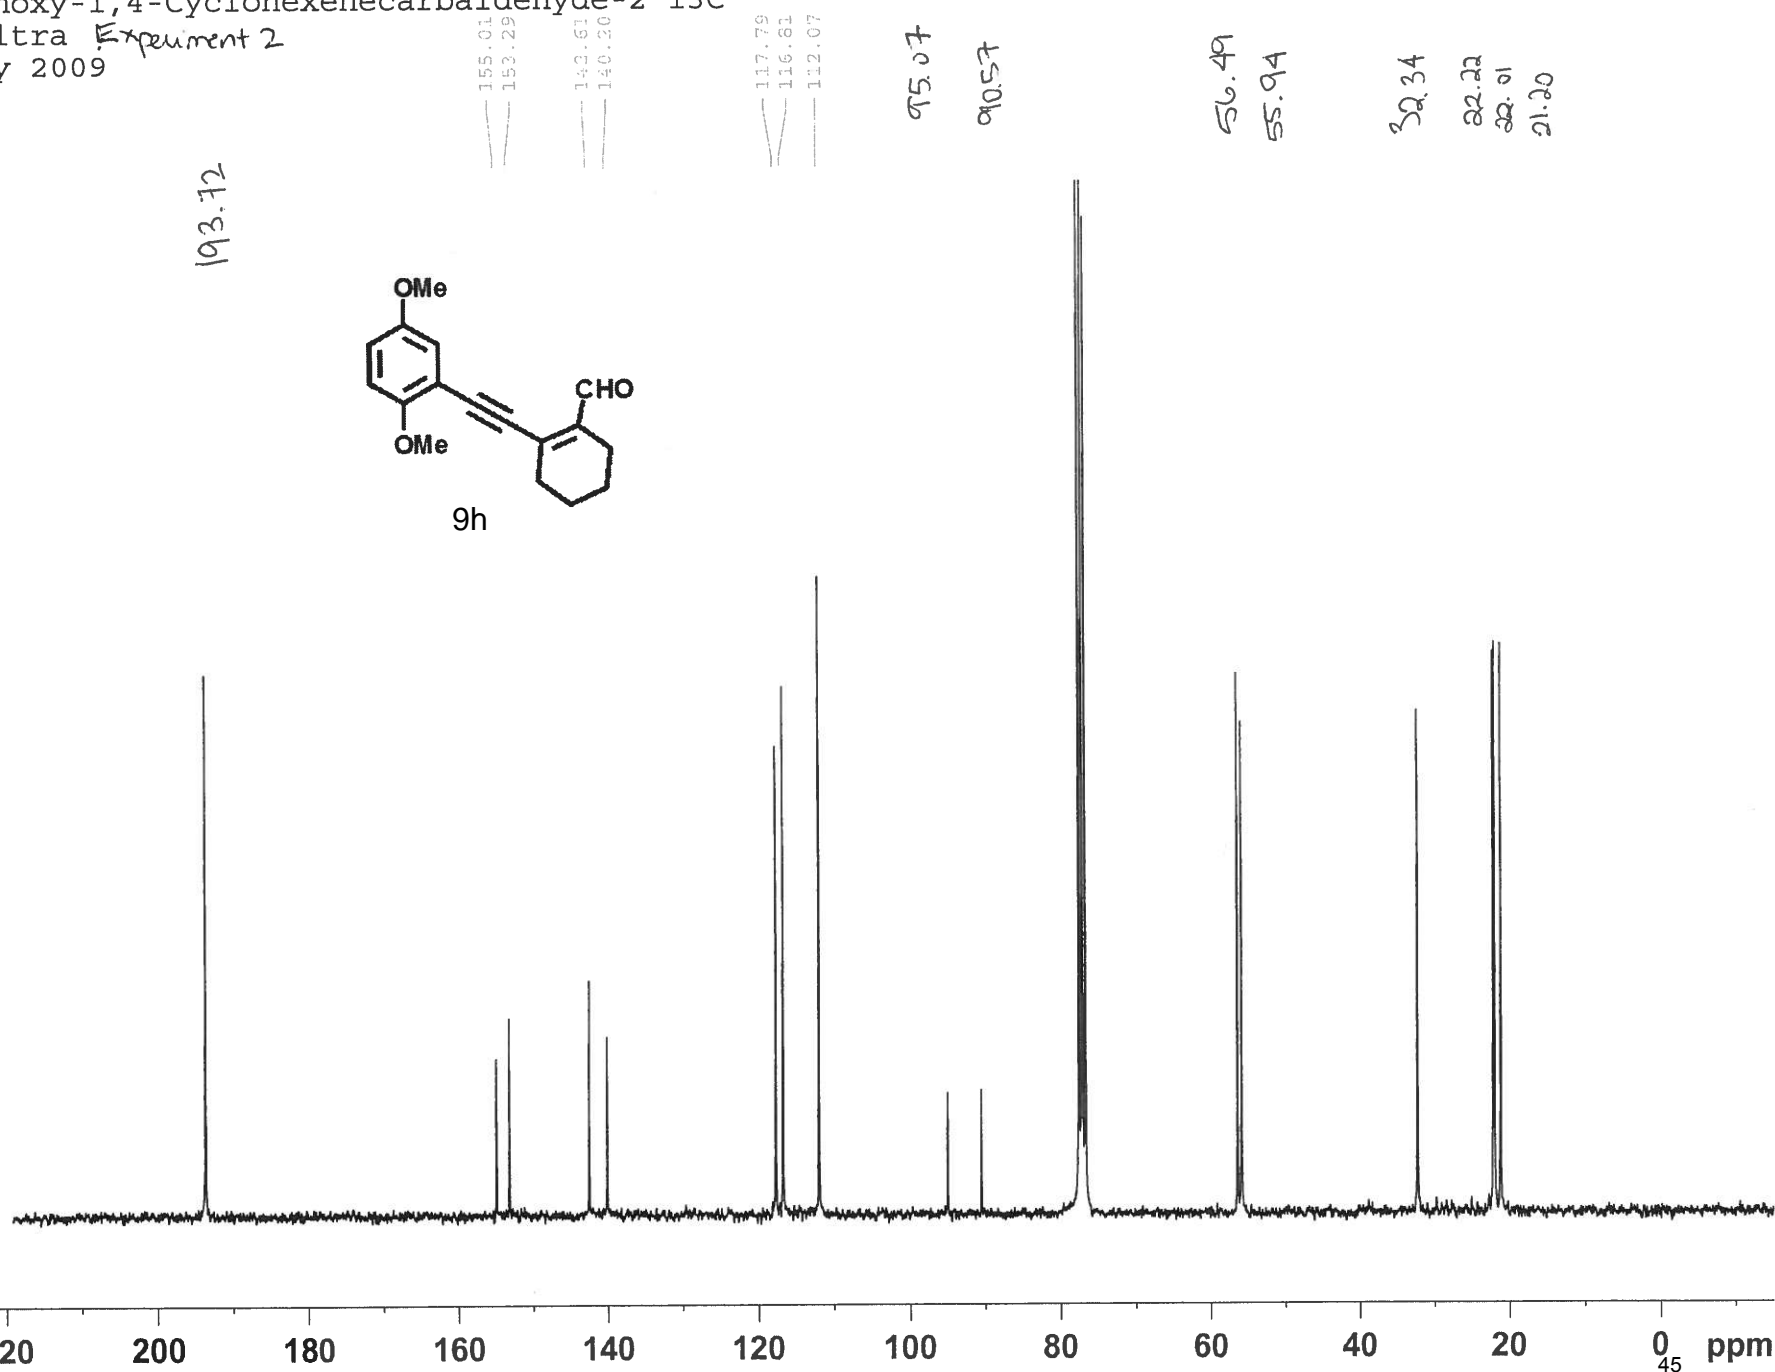

Dimethoxy-1,4-Cycloheptenecarbaldehyde-4  
 Experiment 4 Toppsin 500  
 Region 1.0 ppm suppressed  
 Thursday, 02 December 2010

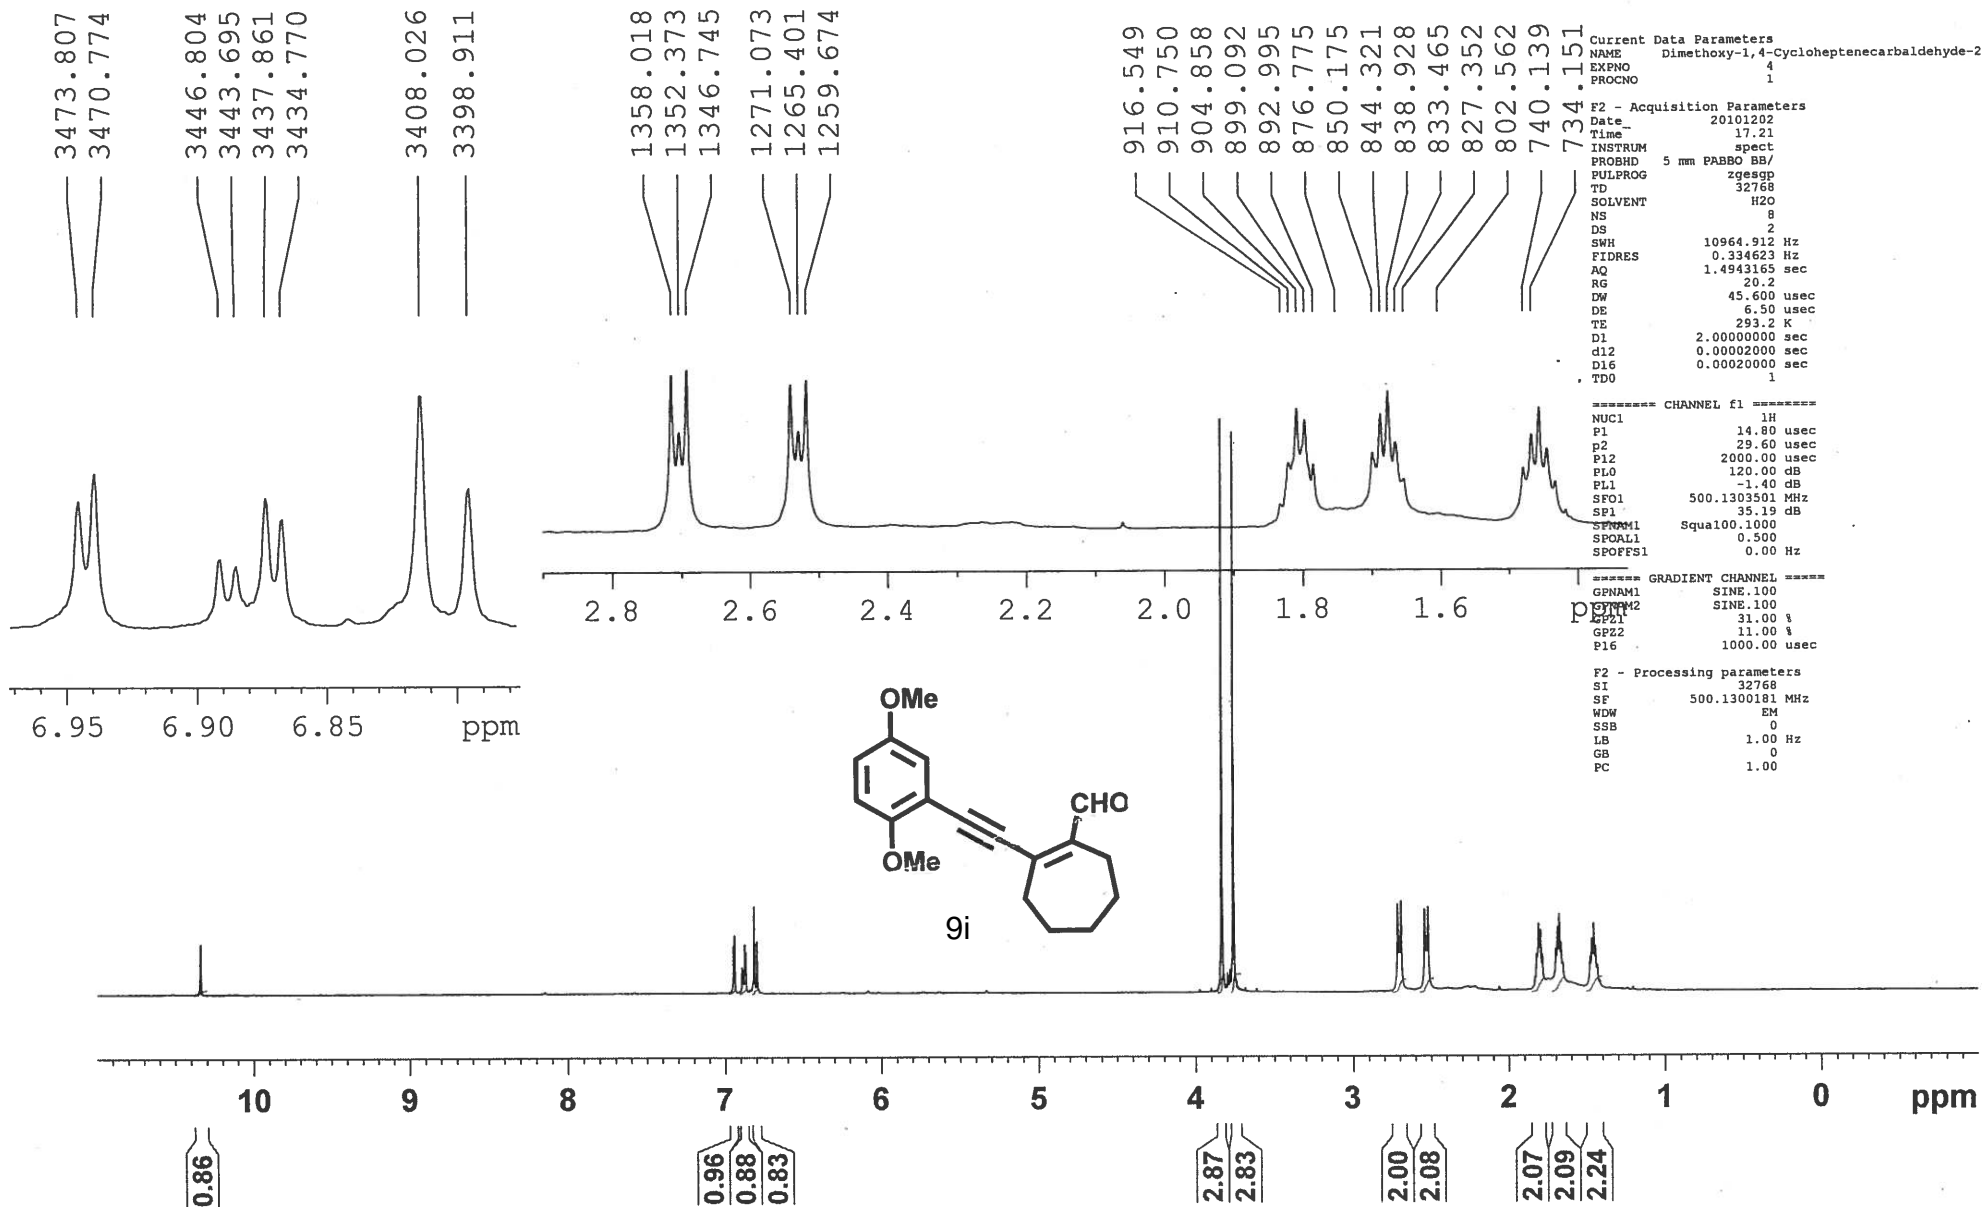

Current Data Parameters  
 NAME Dimethoxy-1,4-Cycloheptenecarbaldehyde-2  
 EXPNO 4  
 PROCNO 1

F2 - Acquisition Parameters  
 Date\_ 20101202  
 Time\_ 17.21  
 INSTRUM spect  
 PROBHD 5 mm PABBO BB/  
 PULPROG zgpg30  
 TD 32768  
 SOLVENT H2O  
 NS 8  
 DS 2  
 SWH 10964.912 Hz  
 FIDRES 0.334623 Hz  
 AQ 1.4943165 sec  
 RG 20.2  
 DW 45.600 usec  
 DE 6.50 usec  
 TE 293.2 K  
 DL 2.00000000 sec  
 d12 0.00002000 sec  
 D16 0.00020000 sec  
 TDO 1

===== CHANNEL f1 =====  
 NUC1 1H  
 P1 14.80 usec  
 P2 29.60 usec  
 P12 2000.00 usec  
 PL0 120.00 dB  
 PL1 -1.40 dB  
 SFO1 500.1303501 MHz  
 SP1 35.19 dB  
 SFOA1 Squal100.1000  
 SPOAL1 0.500  
 SPOFFS1 0.00 Hz

===== GRADIENT CHANNEL =====  
 GPNAM1 SINE.100  
 GPM2 SINE.100  
 GPZ1 31.00 %  
 GPZ2 11.00 %  
 P16 1000.00 usec

F2 - Processing parameters  
 SI 32768  
 SF 500.1300181 MHz  
 WDW EM  
 SSB 0  
 LB 1.00 Hz  
 GB 0  
 PC 1.00

Dimethoxy-1,4-Cycloheptenecarbaldehyde-2  
 Experiment 6 Topspin 500 13C  
 Thursday 02 December 2010

193.04  
 154.94  
 153.18  
 148.18  
 145.92  
 117.59  
 116.86  
 112.02  
 111.92  
 96.80  
 91.99  
 77.38  
 77.12  
 76.87  
 56.36  
 55.83  
 37.42  
 32.31  
 25.78  
 24.26

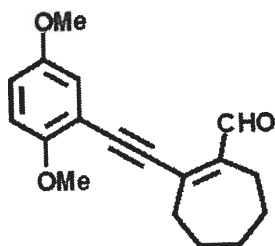

9i

Current Data Parameters  
 NAME Dimethoxy-1,4-Cycloheptenecarbaldehyde-2  
 EXPNO 6  
 PROCNO 1  
 F2 - Acquisition Parameters  
 Date\_ 20101202  
 Time\_ 18.02  
 INSTRUM spect  
 PROBHD 5 mm PABBO BB/  
 PULPROG zgpg30  
 TD 16384  
 SOLVENT CDCl3  
 NS 25  
 DS 4  
 SWH 30030.029 Hz  
 FIDRES 1.832888 Hz  
 AQ 0.2728436 sec  
 RG 1625.5  
 DW 16.650 usec  
 DE 6.50 usec  
 TE 294.2 K  
 D1 1.00000000 sec  
 d11 0.03000000 sec  
 DELTA 0.89999998 sec  
 TDO 1  
 ===== CHANNEL f1 =====  
 NUC1 13C  
 P1 9.50 usec  
 PL1 -0.70 dB  
 SFO1 125.7702890 MHz  
 ===== CHANNEL f2 =====  
 CPDPRG2 waltz16  
 NUC2 1H  
 PCPD2 70.00 usec  
 PL2 -1.20 dB  
 PL12 12.30 dB  
 PL13 15.30 dB  
 SFO2 500.1325010 MHz  
 F2 - Processing parameters  
 SI 32768  
 SF 125.7577890 MHz  
 WDW EM  
 SSB 0  
 LB 2.00 Hz  
 GB 0  
 PC 1.40

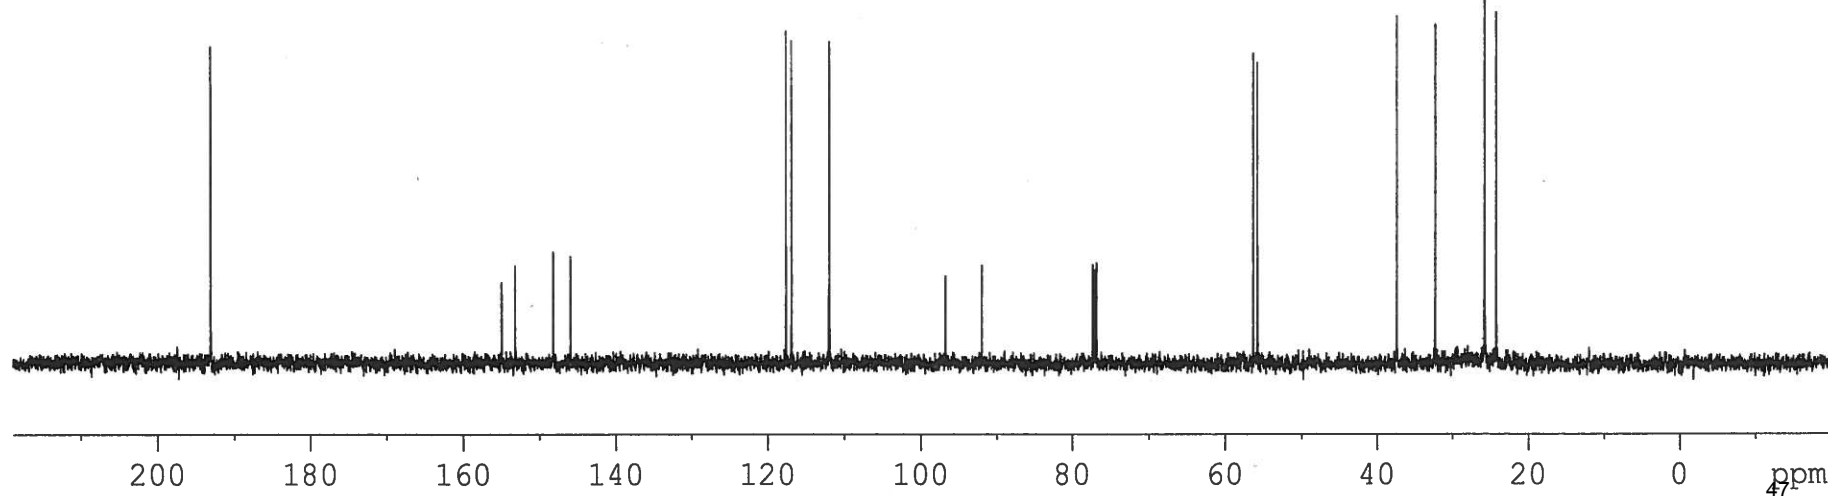

Trimethoxy-4-CC-CyclopenteneCHO  
 Experiment 5  
 Topsisin 500  
 Tuesday 21 September 2010

10.185

3590.457  
 3581.445

7.179  
 7.161  
 6.666  
 6.648

3333.997  
 3324.955

3.983  
 3.893  
 3.876  
 2.830  
 2.814  
 2.798  
 2.674  
 2.658  
 2.643  
 2.037  
 2.021  
 2.006  
 1.990  
 1.974

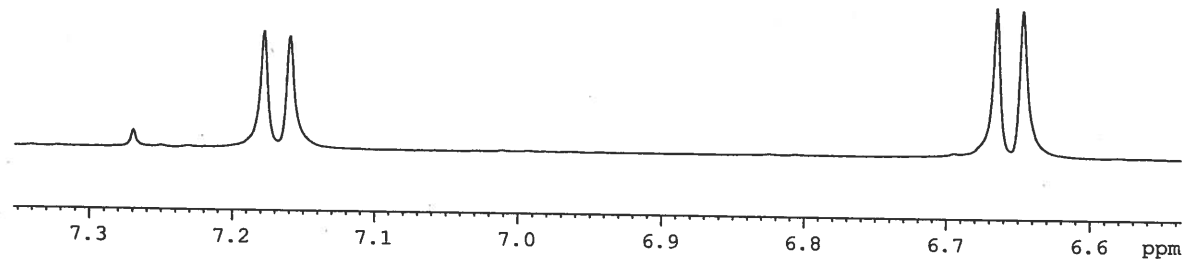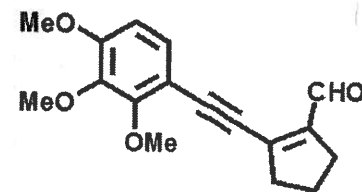

9j

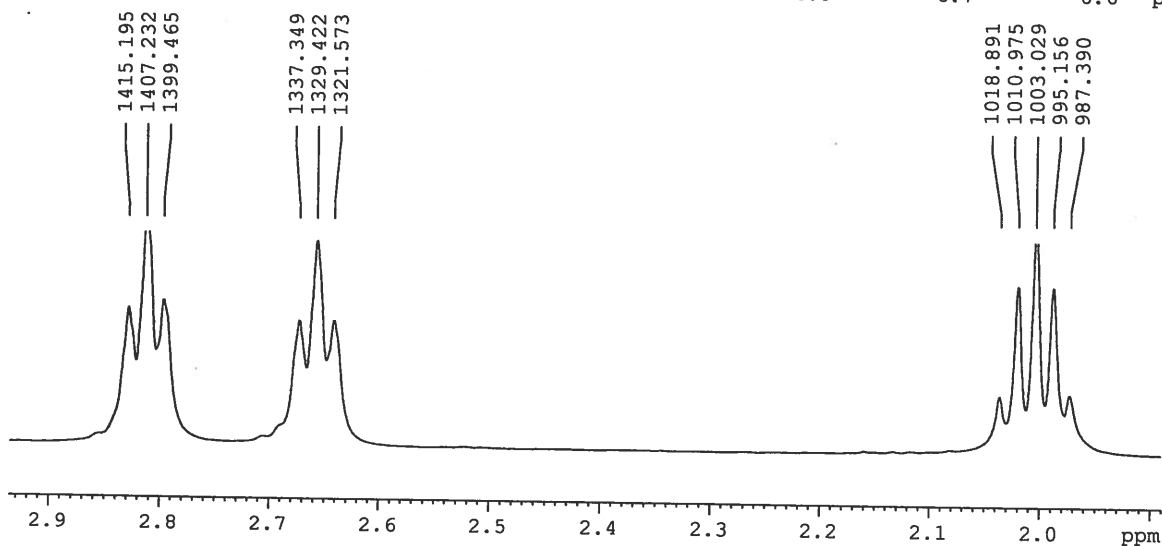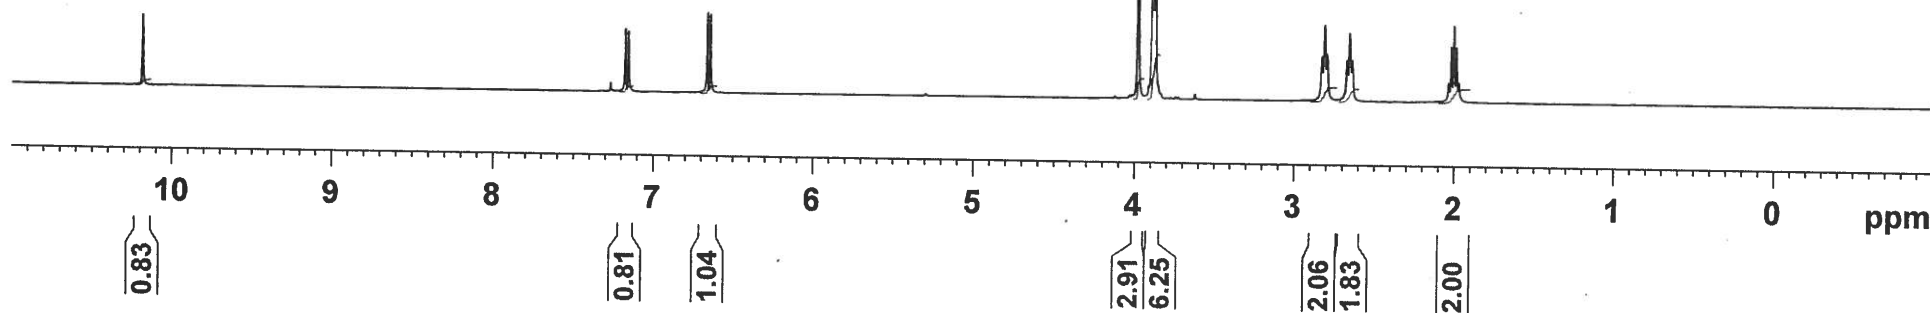

Trimethoxy-4-cyclopenteneCHO Sonogoshira 13C

Experiment 3

Ultra 300

Tuesday 21 September 2010

189.23

155.56  
155.09  
147.11  
143.61  
142.38  
126.59  
109.97  
107.59  
97.59  
86.39  
77.59  
77.16  
76.74  
61.59  
61.22  
59.78  
39.02  
29.69  
22.34

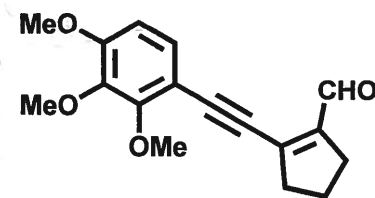

9j

220 200 180 160 140 120 100 80 60 40 20 0 ppm

Trimethoxy-4-CC-Cyclohexenecarbaldehyde  
 300 Experiment 1  
 20 August 2009

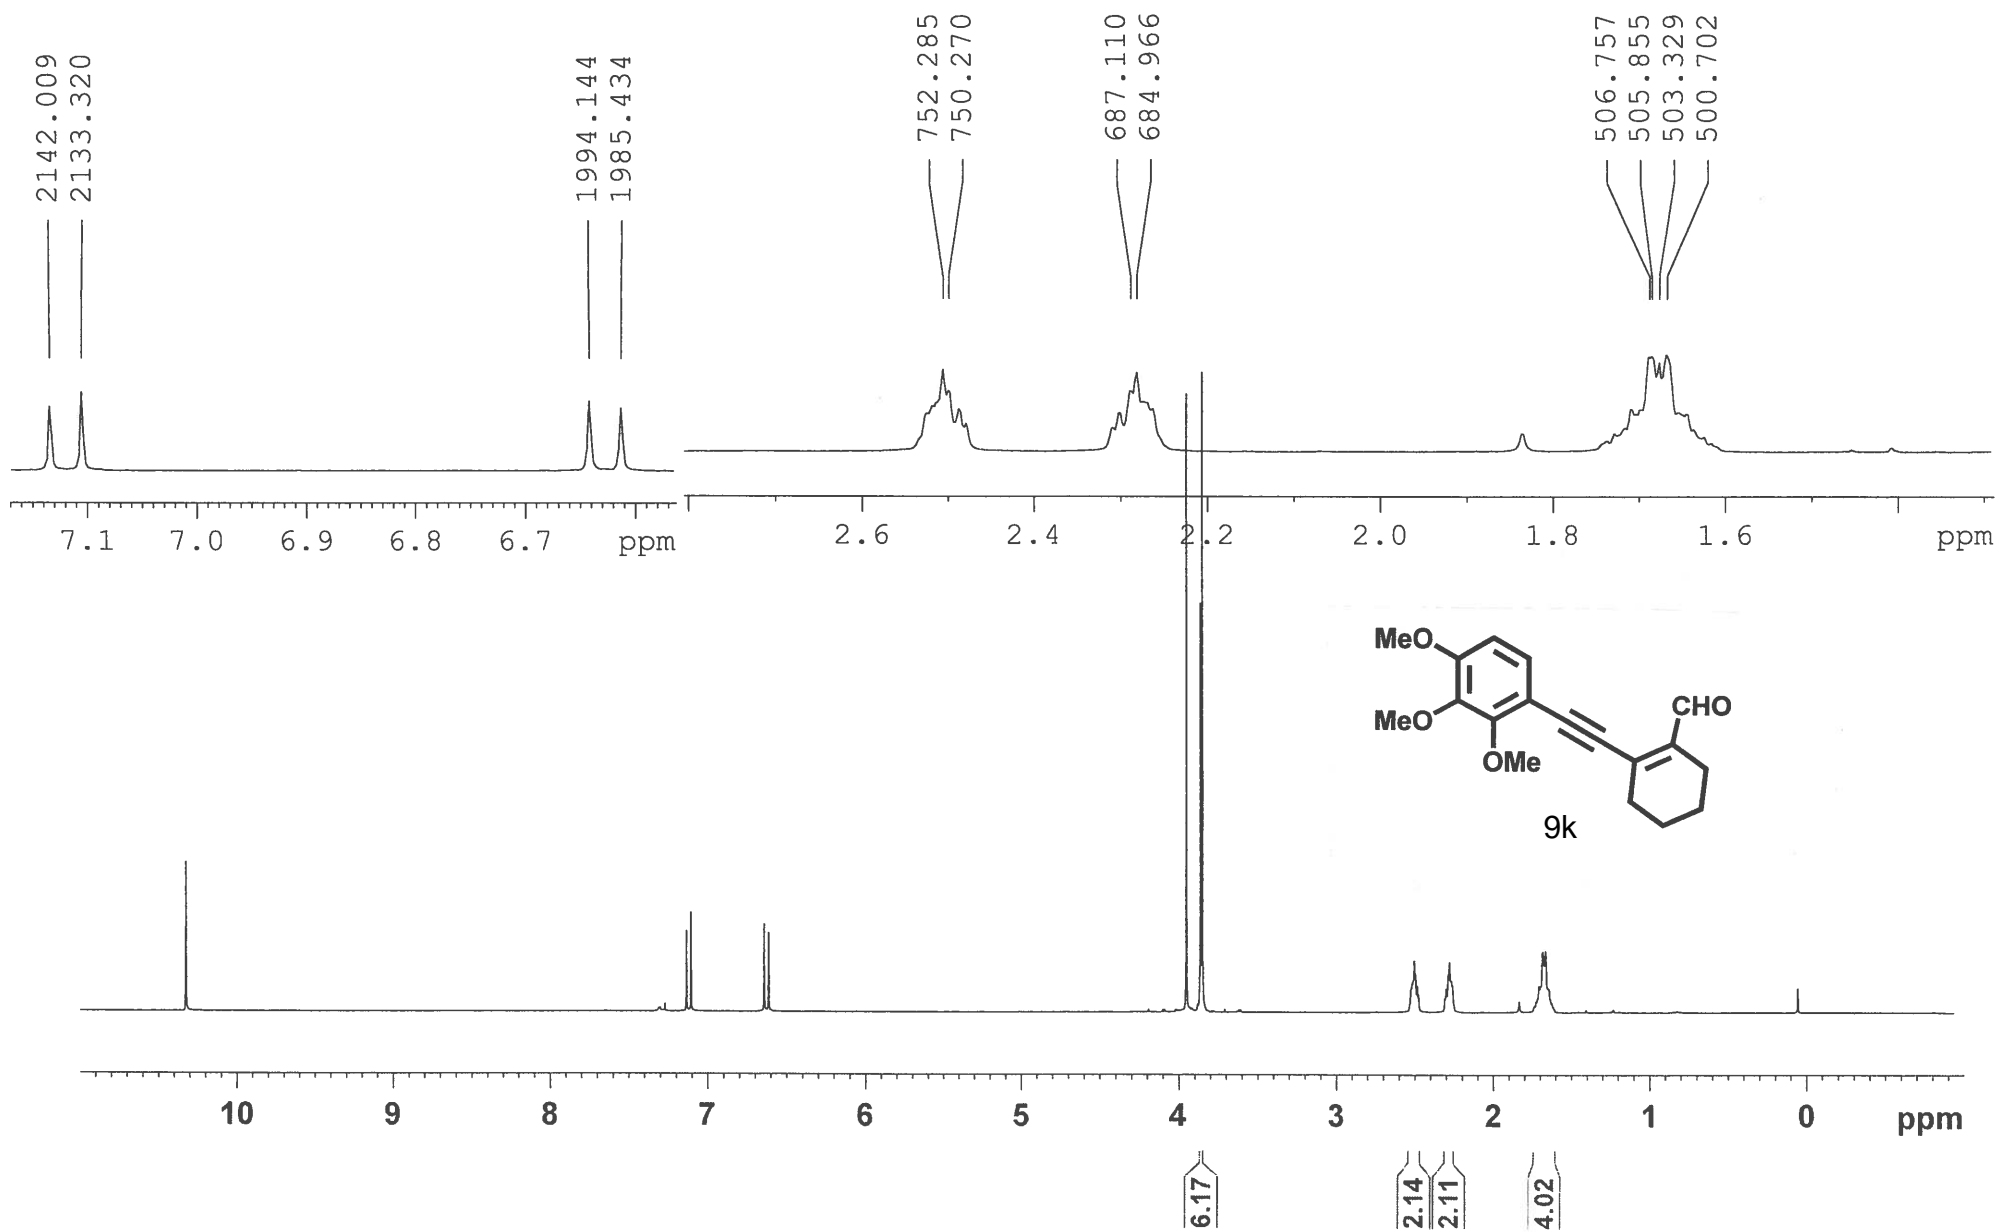

Trimethoxybenzene-4-CC-Cyclohexenecarbaldehyde 13C  
 300 Ultra Experiment 2 (1557 scans)  
 24 August 2009

155.43 155.40  
 142.22 141.98 140.50  
 129.53 128.33  
 109.60 107.55  
 95.27 89.29  
 77.65 77.23 76.81  
 61.48 61.19 56.26  
 32.42  
 22.17 22.03 21.22

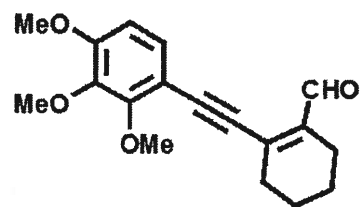

9k

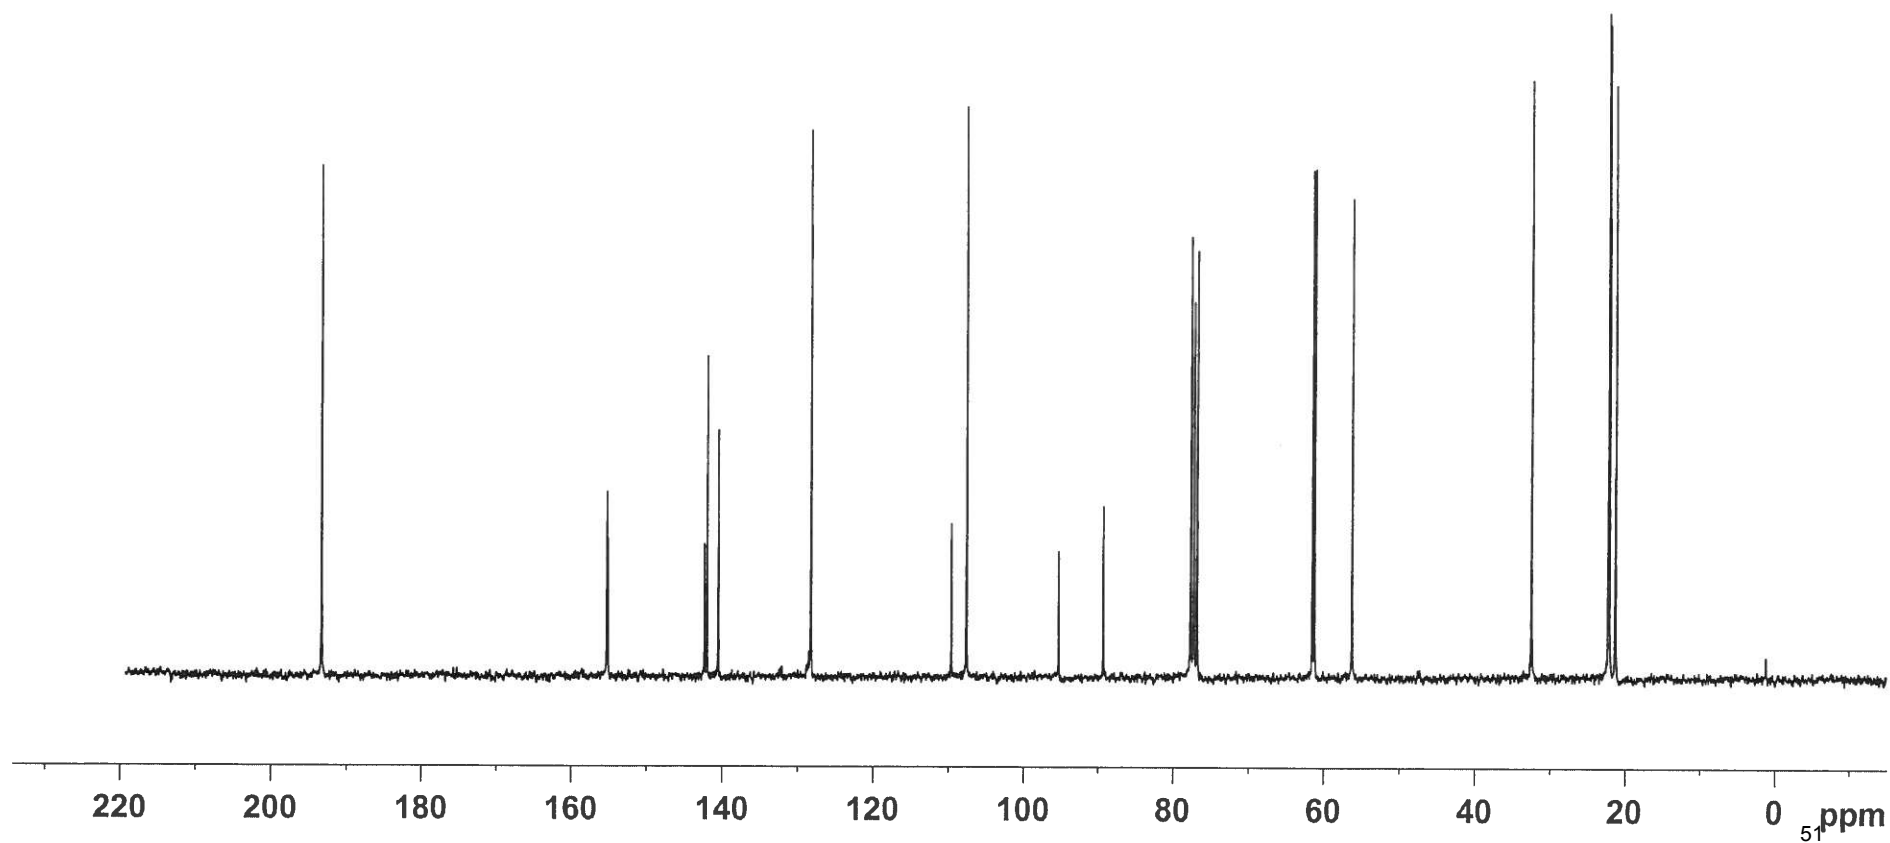

Trimethoxy-4-CC-Cyclohexenecarbaldehyde  
 300 Experiment 1  
 20 August 2009

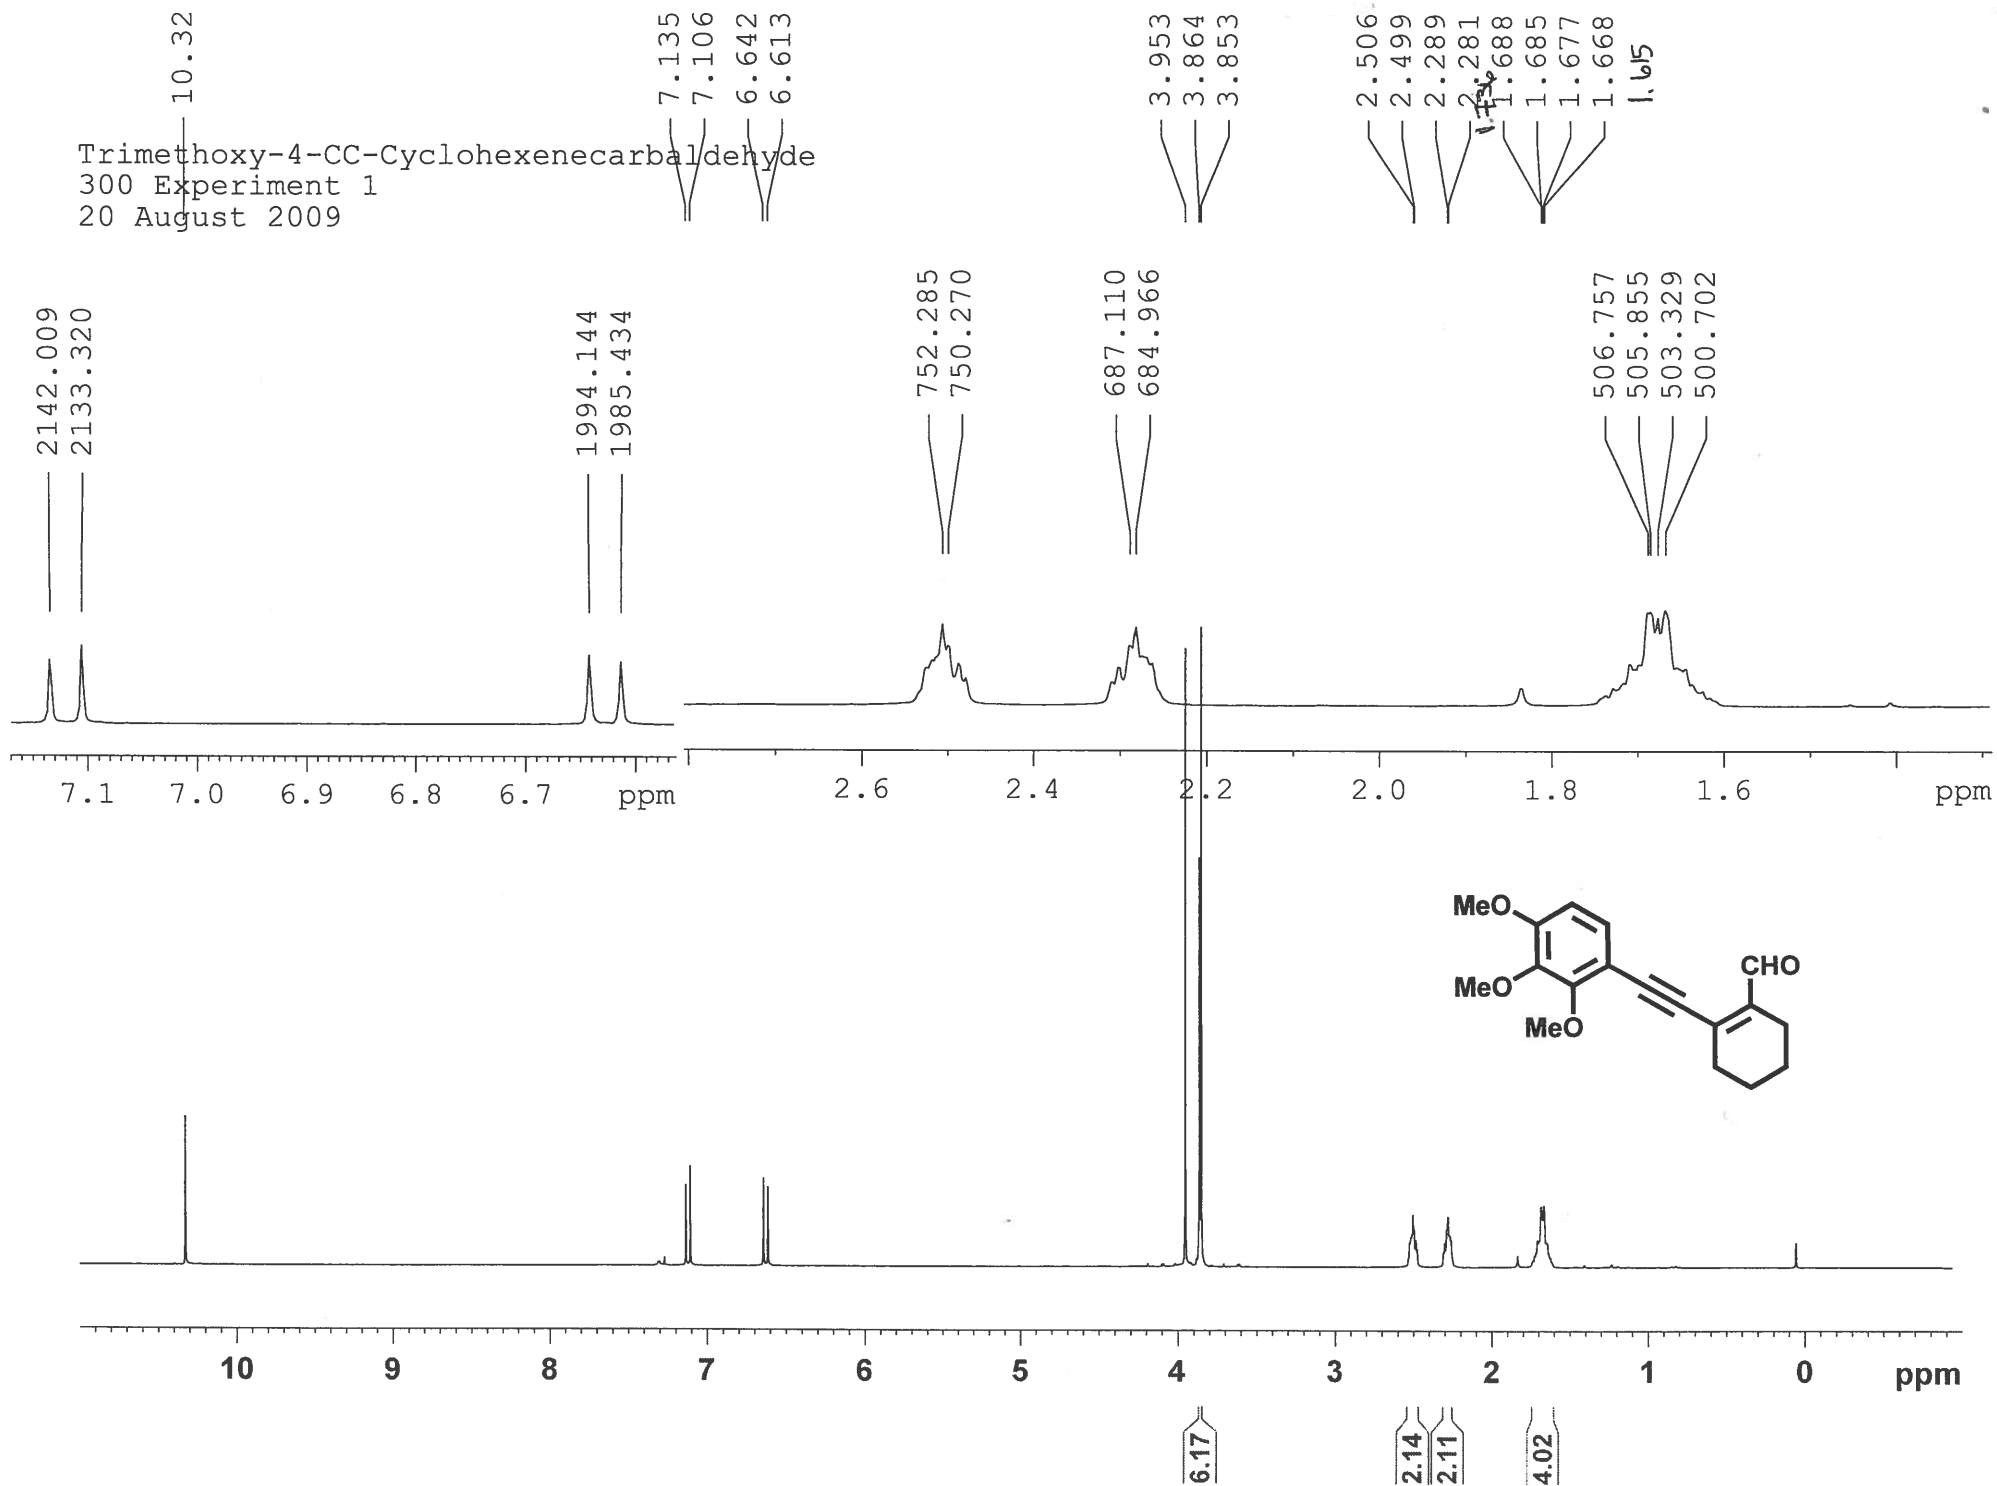



Trimethoxybenzene-4-CC-Cyclohexenecarbaldehyde 13C  
 300 Ultra Experiment 2 (1557 scans)  
 24 August 2009

155.85  
 155.80  
 142.52  
 141.97  
 140.50  
 128.53  
 128.24  
 109.60  
 107.56  
 95.27  
 89.29  
 77.65  
 77.23  
 76.81  
 61.48  
 61.19  
 56.20  
 32.42  
 22.17  
 22.03  
 21.22

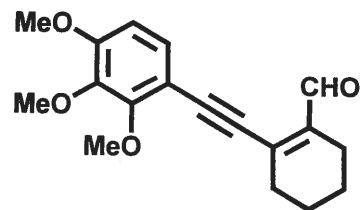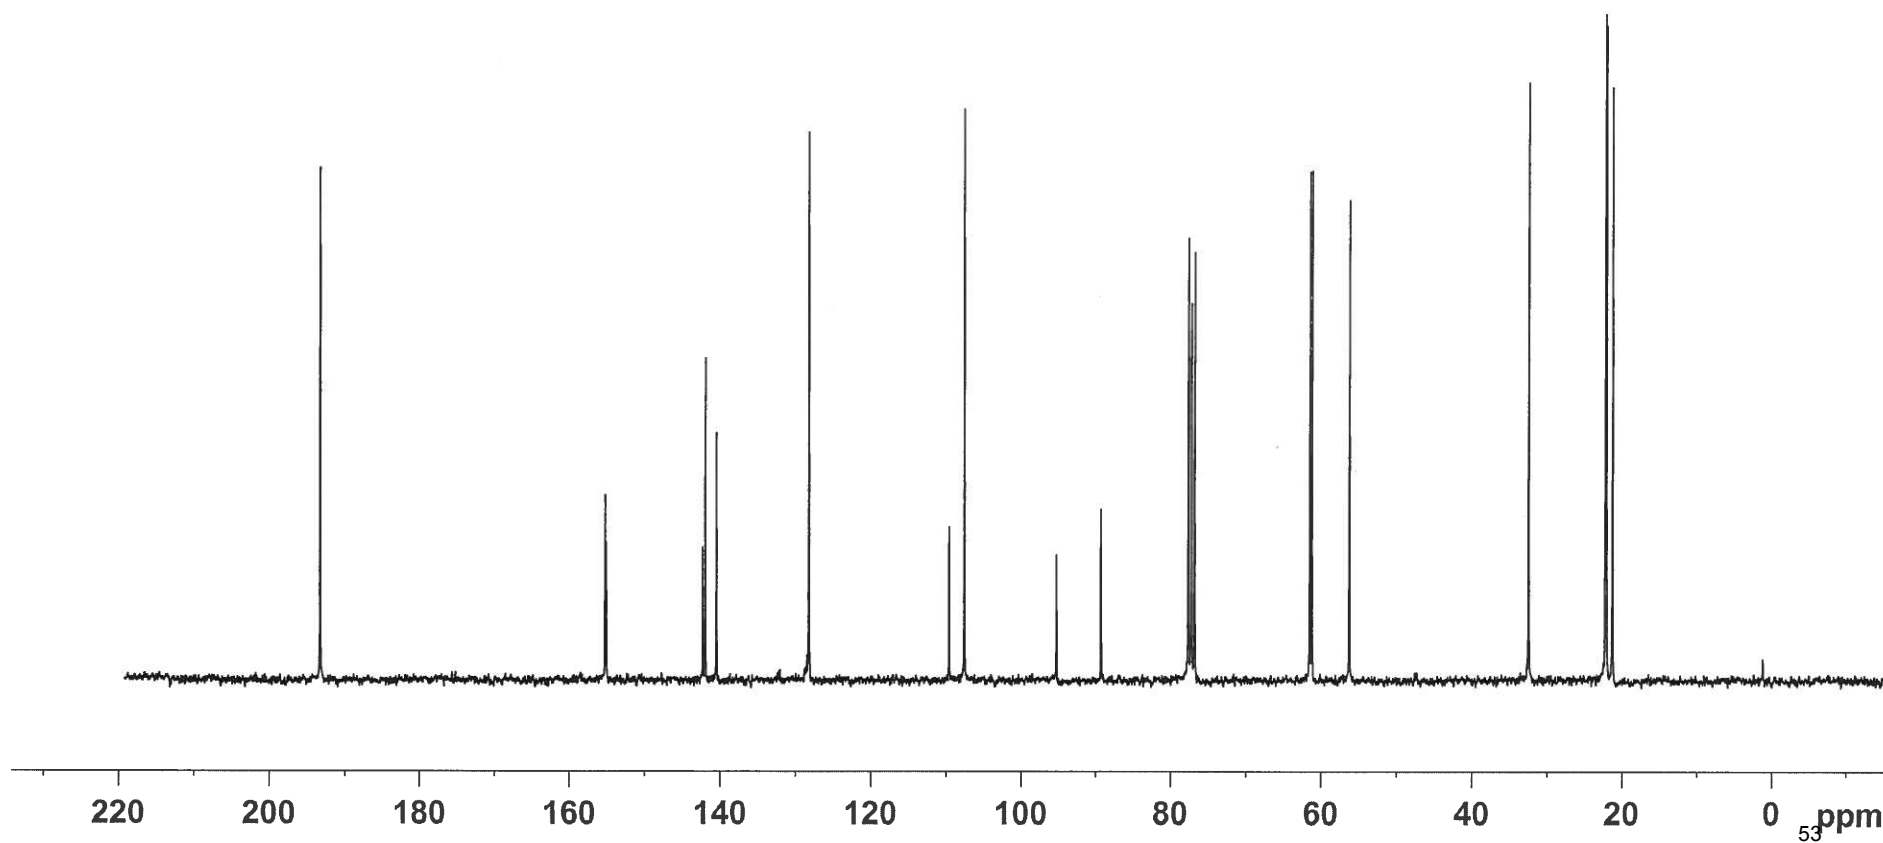

Trimethoxy-5-CC-CyclopenteneCHO  
Experiment 2 Topspin 500  
Friday 07 October 2011

10.153

6.710

3.854  
2.802  
2.797  
2.786  
2.775  
2.770  
2.767  
2.658  
2.654  
2.650  
2.639  
2.627  
2.623  
2.020  
2.004  
1.988  
1.972  
1.957

1401.210  
1399.093  
1393.479  
1387.600  
1385.555  
1383.663  
1329.494  
1327.564  
1325.514  
1319.865  
1314.003  
1312.039

1010.142  
1002.256  
994.310  
986.459  
978.648

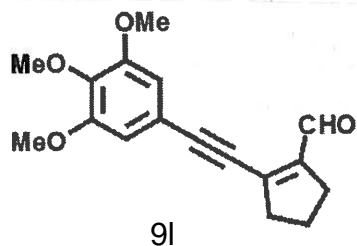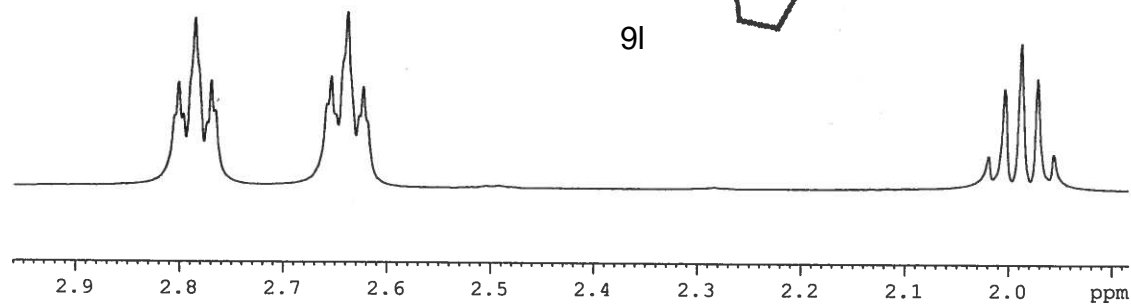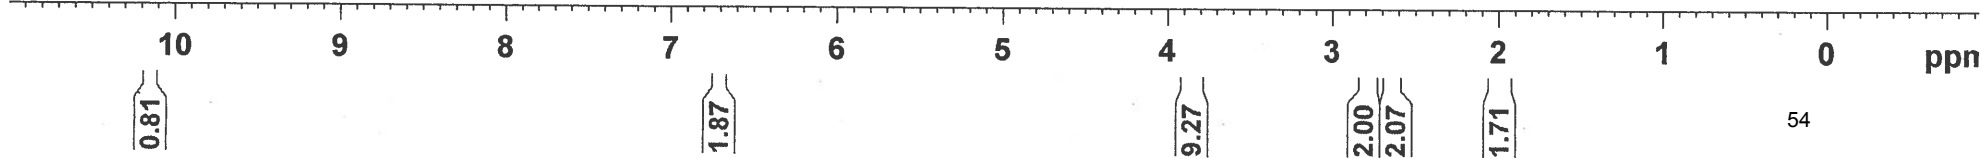

Current Data Parameters  
NAME Trimethoxy-5-CC-CyclopenteneCHO  
EXNO 2  
PROCNO 1

F2 - Acquisition Parameters  
Date\_ 20111007  
Time\_ 12.24  
INSTRUM spect  
PROBHD 5 mm PABBO BB/  
PULPROG zgpg30  
TD 32768  
SOLVENT C6D6  
NS 8  
DS 2  
SWH 10964.912 Hz  
FIDRES 0.334623 Hz  
AQ 1.4943165 sec  
RG 32  
DW 45.600 usec  
DE 6.50 usec  
TE 297.2 K  
D1 2.00000000 sec  
d12 0.00002000 sec  
D16 0.00020000 sec  
TDO 1

===== CHANNEL f1 =====  
NUC1 1H  
P1 14.80 usec  
P2 29.60 usec  
P12 2000.00 usec  
PL0 120.00 dB  
PL1 -1.40 dB  
SF01 500.1305001 MHz  
SP1 35.19 dB  
SPNAM1 Squa100,1000  
SPOAL1 0.500  
SPOFFS1 0.00 Hz

===== GRADIENT CHANNEL =====  
GPNAM1 SINE.100  
GPNAM2 SINE.100  
GP21 31.00 %  
GP22 11.00 %  
P16 1000.00 usec

F2 - Processing parameters  
SI 32768  
SF 500.1300196 MHz  
WDW EM  
SSB 0  
LB 1.00 Hz  
GB 0  
PC 1.00

Trimethoxy-5-Cyclopentene Sonogoshirai  
 300 Ultra  
 Experiment 1  
 17 March 2009

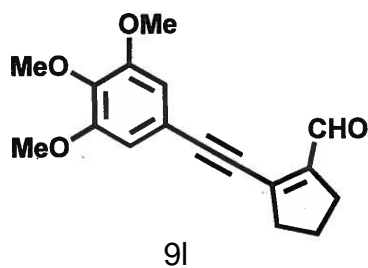

189.6173

153.21142

147.97159

145.06180

139.92150

13

117.6503

109.2807

101.0430

82.6370

61.1396

56.3368

39.0365

29.7229

22.3057

220 200 180 160 140 120 100 80 60 40 20 0 ppm

Trimethoxy-5-CC-Cyclohexenecarbaldehyde  
 500 Tpsin  
 2 September 2009

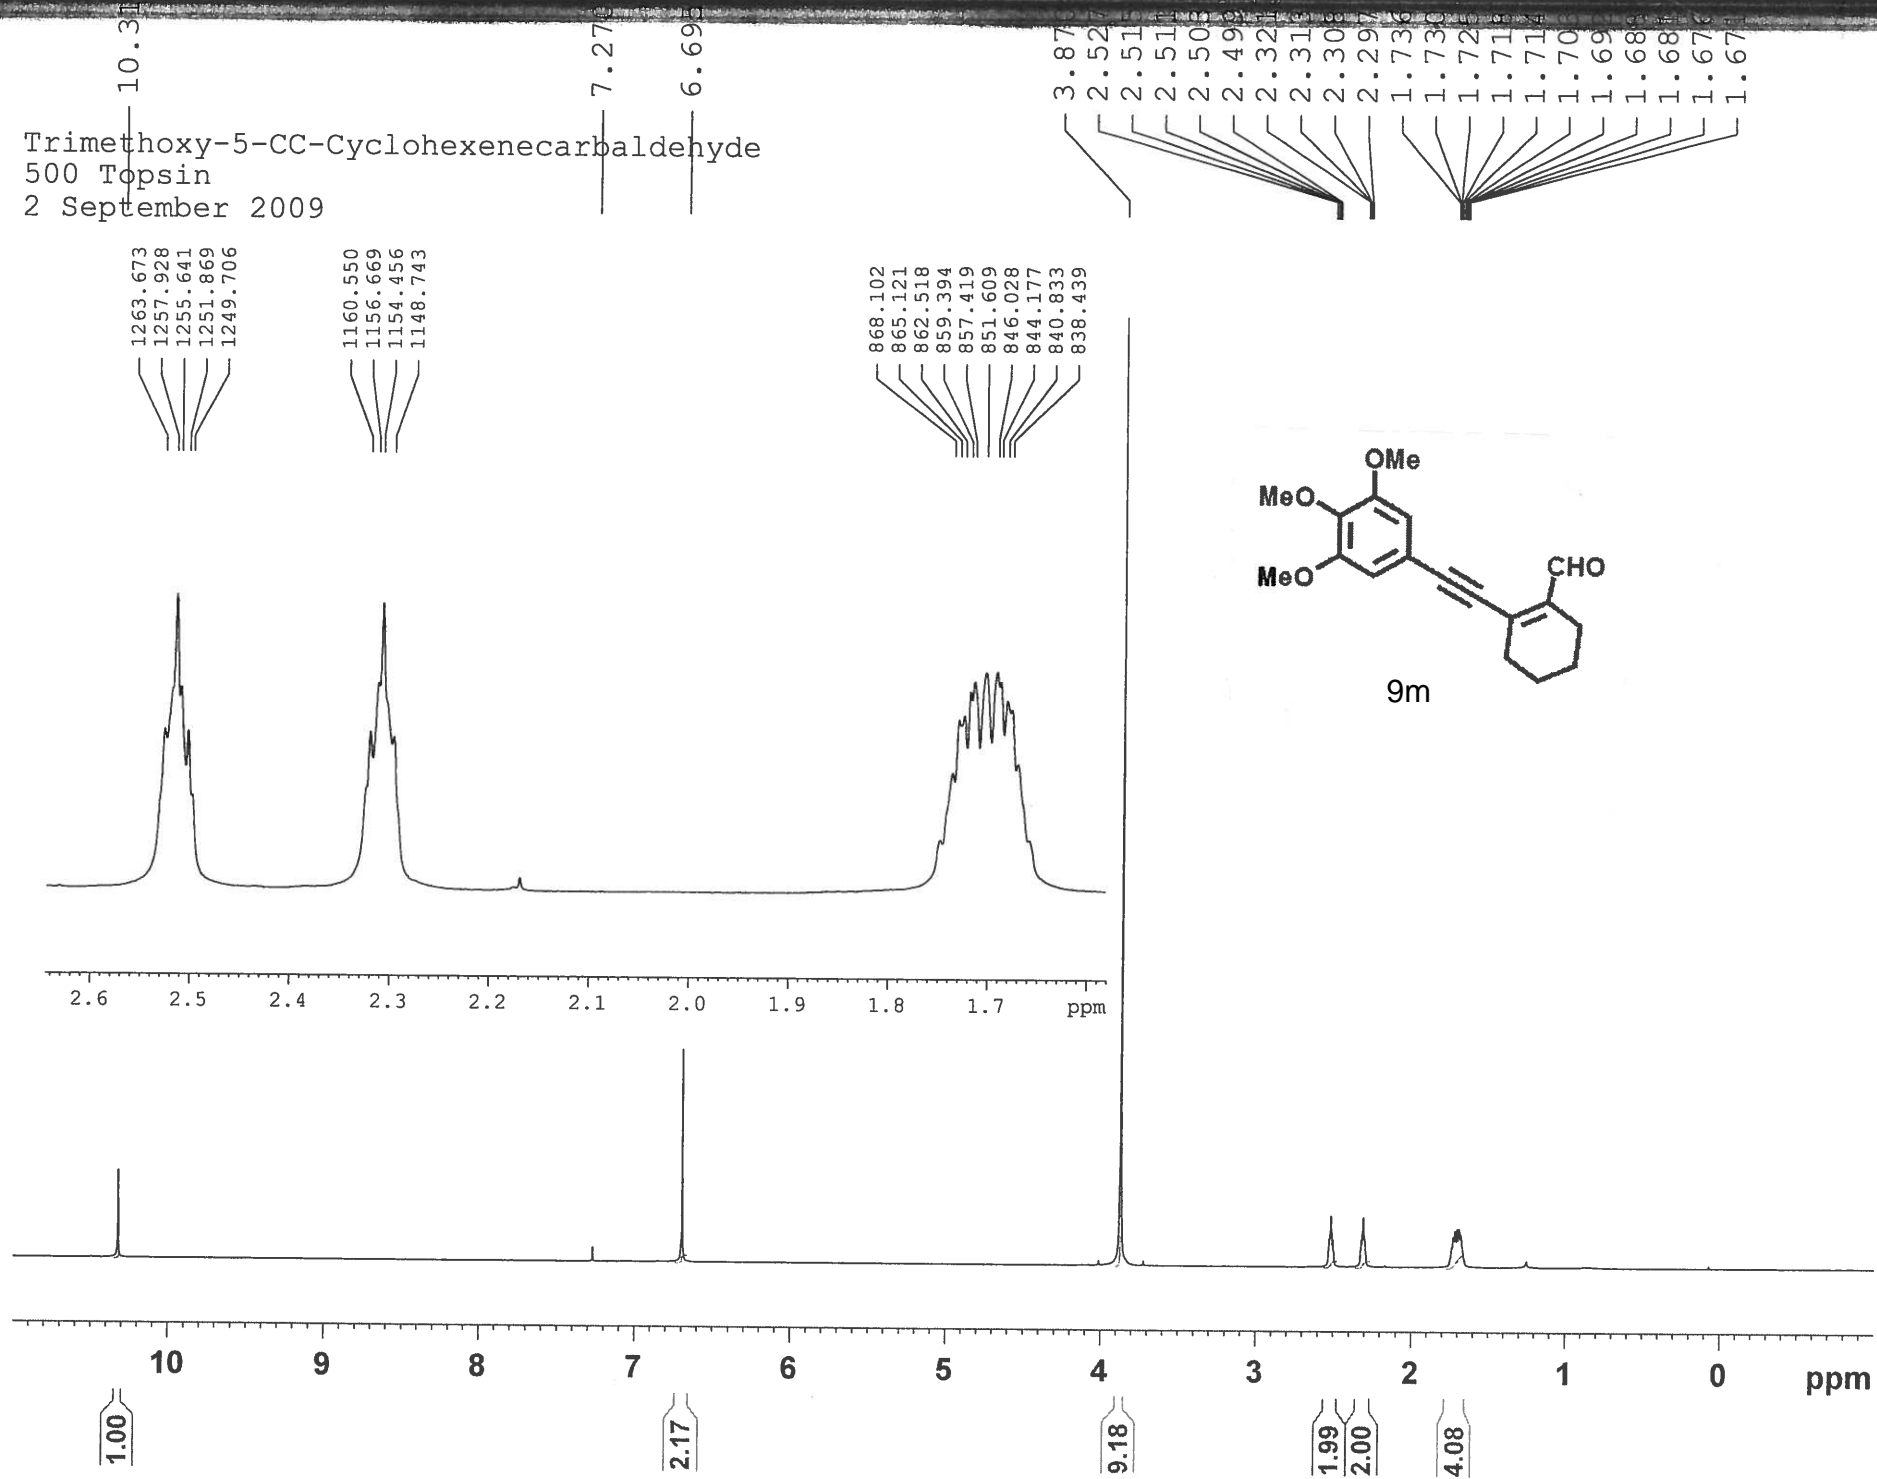

Trimethoxy-5-Cyclohexenecarbaldehyde 13C  
 300 Ultra  
 2 September 2009

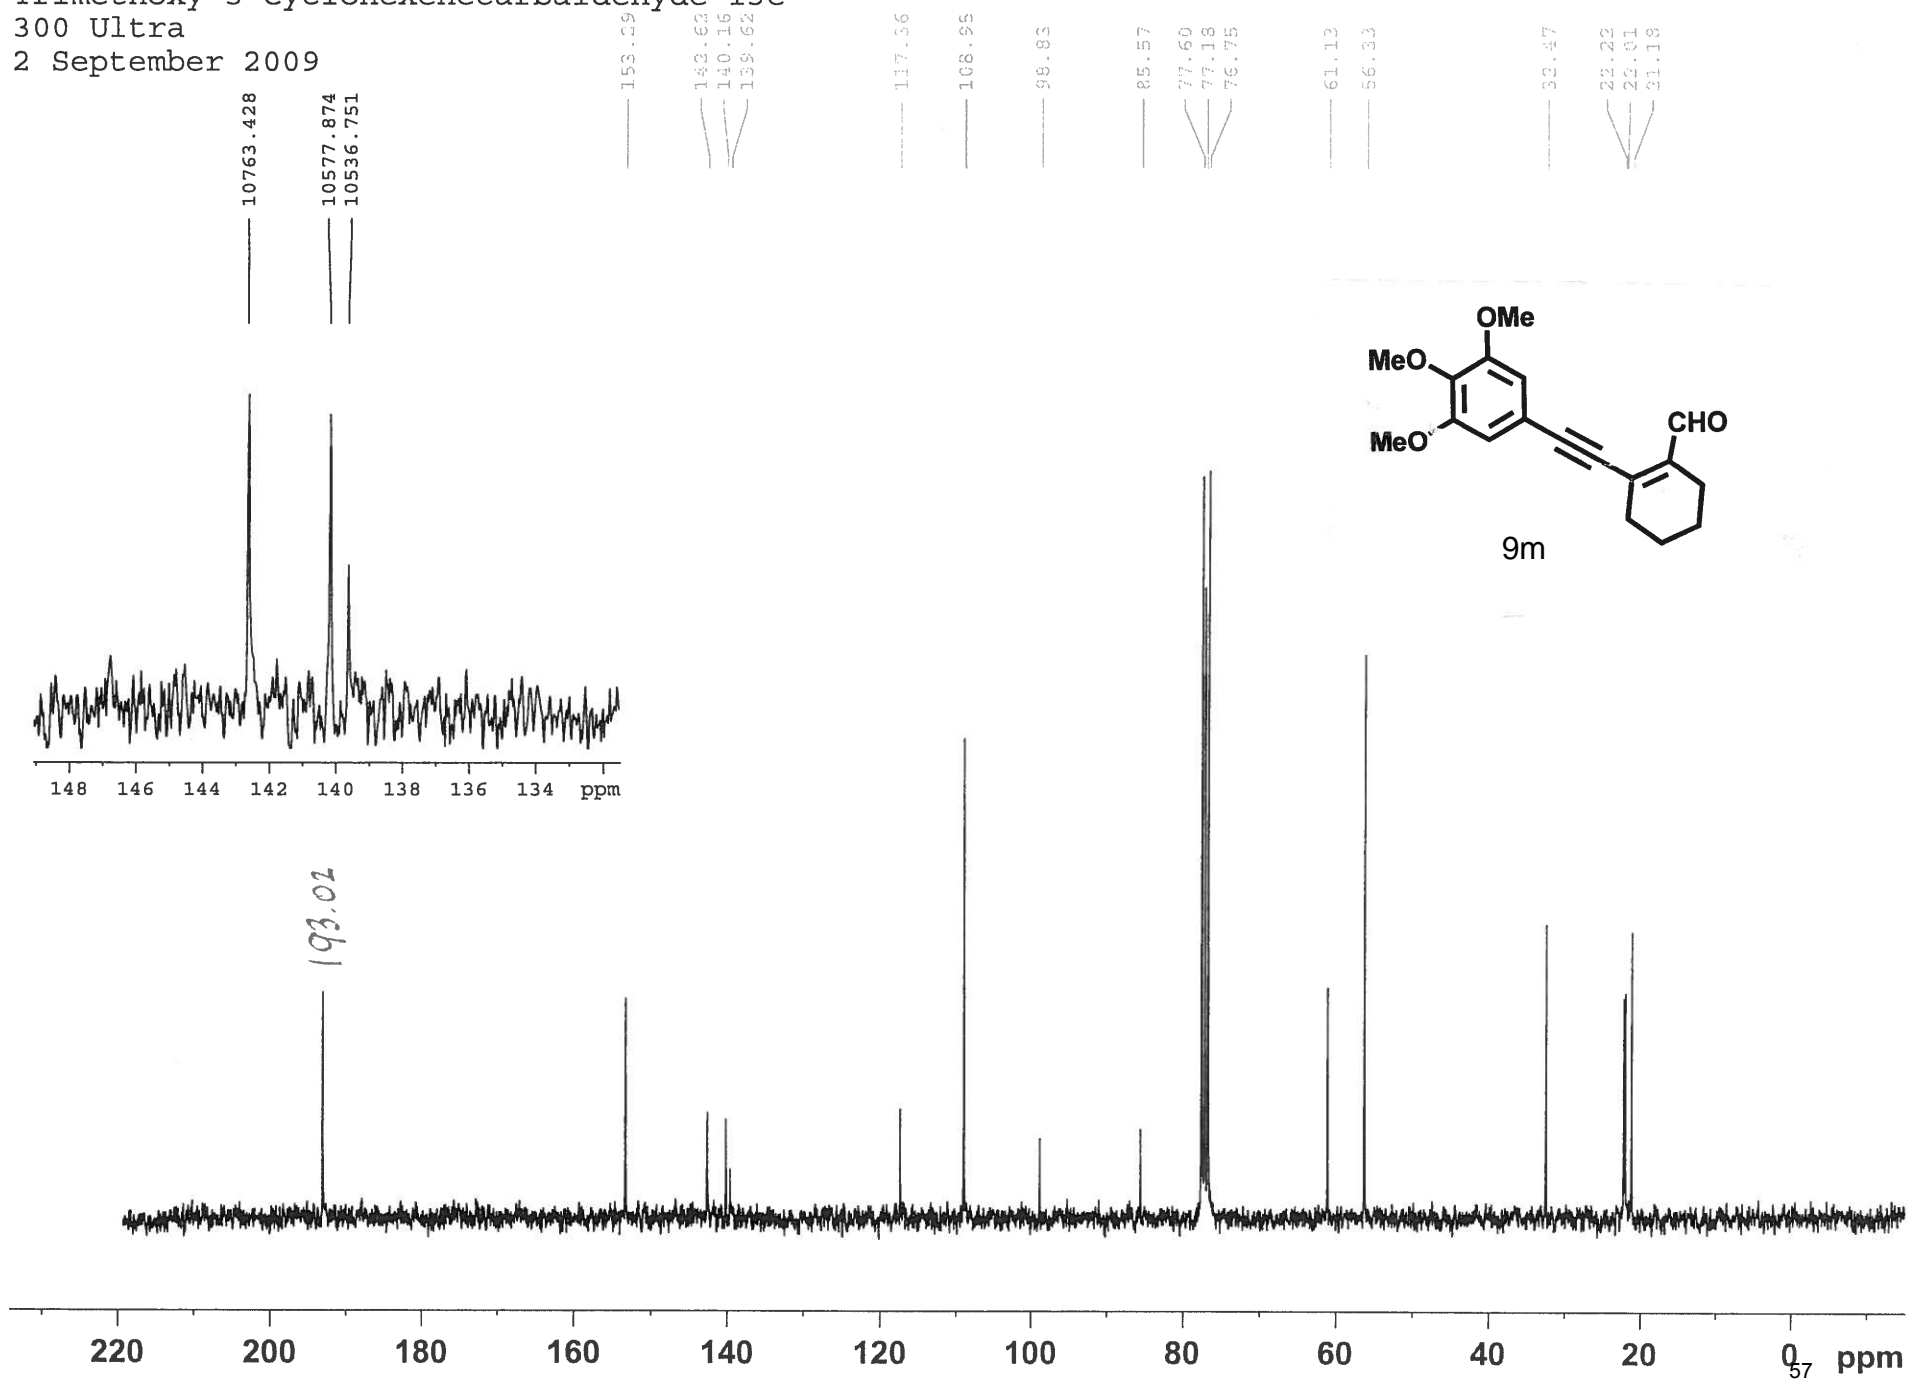

Trimethoxy-5-CC-Cycloheptenecarbaldehyde  
 Experiment 6 Topspin 500  
 Wednesday 18 May 2010

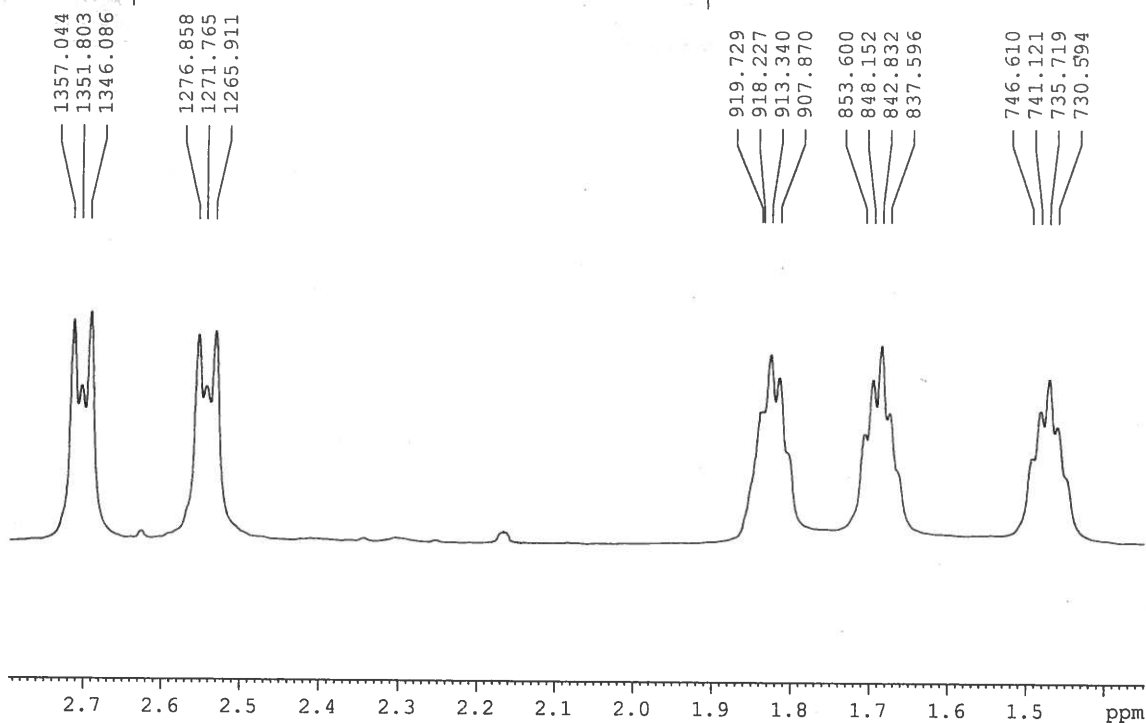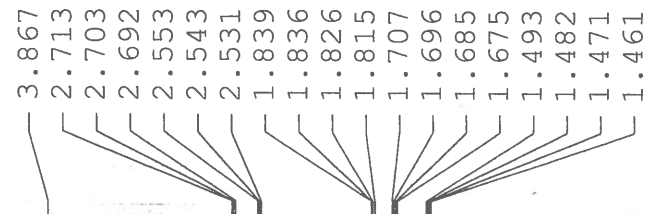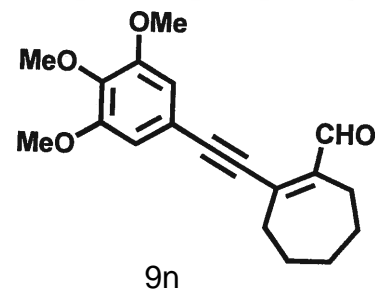

Current Data Parameters  
 NAME Trimethoxy-5-CC-Cycloheptenecarbaldehyde  
 EXPNO 6  
 PROCNO 1

F2 - Acquisition Parameters  
 Date\_ 20110518  
 Time 10.44  
 INSTRUM spect  
 PROBHD 5 mm PABBO BB/  
 PULPROG zgpg30  
 TD 32768  
 SOLVENT C6D6  
 NS 8  
 DS 2  
 SWH 10964.912 Hz  
 FIDRES 0.334623 Hz  
 AQ 1.4941165 sec  
 RG 40.3  
 DW 45.600 usec  
 DE 6.50 usec  
 TE 296.2 K  
 D1 2.00000000 sec  
 d12 0.00002000 sec  
 D16 0.00020000 sec  
 TDO 1

===== CHANNEL f1 =====  
 NUC1 1H  
 P1 14.80 usec  
 p2 29.60 usec  
 P12 2000.00 usec  
 PL0 120.00 dB  
 PL1 -1.40 dB  
 SFO1 500.1303751 MHz  
 SP1 35.19 dB  
 SPMAM1 Squal00, 1000  
 SPOAL1 0.500  
 SPOFFS1 0.00 Hz

===== GRADIENT CHANNEL =====  
 GPMAM1 SINE.100  
 GPMAM2 SINE.100  
 GP21 31.00 V  
 GP22 11.00 V  
 P16 1000.00 usec

F2 - Processing parameters  
 SI 32768  
 SF 500.1300190 MHz  
 WDW EM  
 SSB 0  
 LB 0.50 Hz  
 GB 0  
 PC 1.00

imethoxy-55-CC-Cycloheptenecarbaldehyde 13C  
pspsin 300  
periment 1  
nesday 18 May 2011

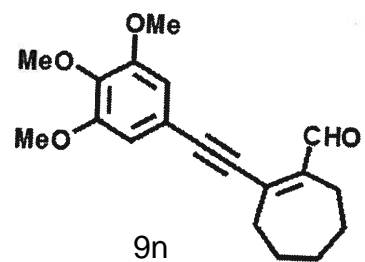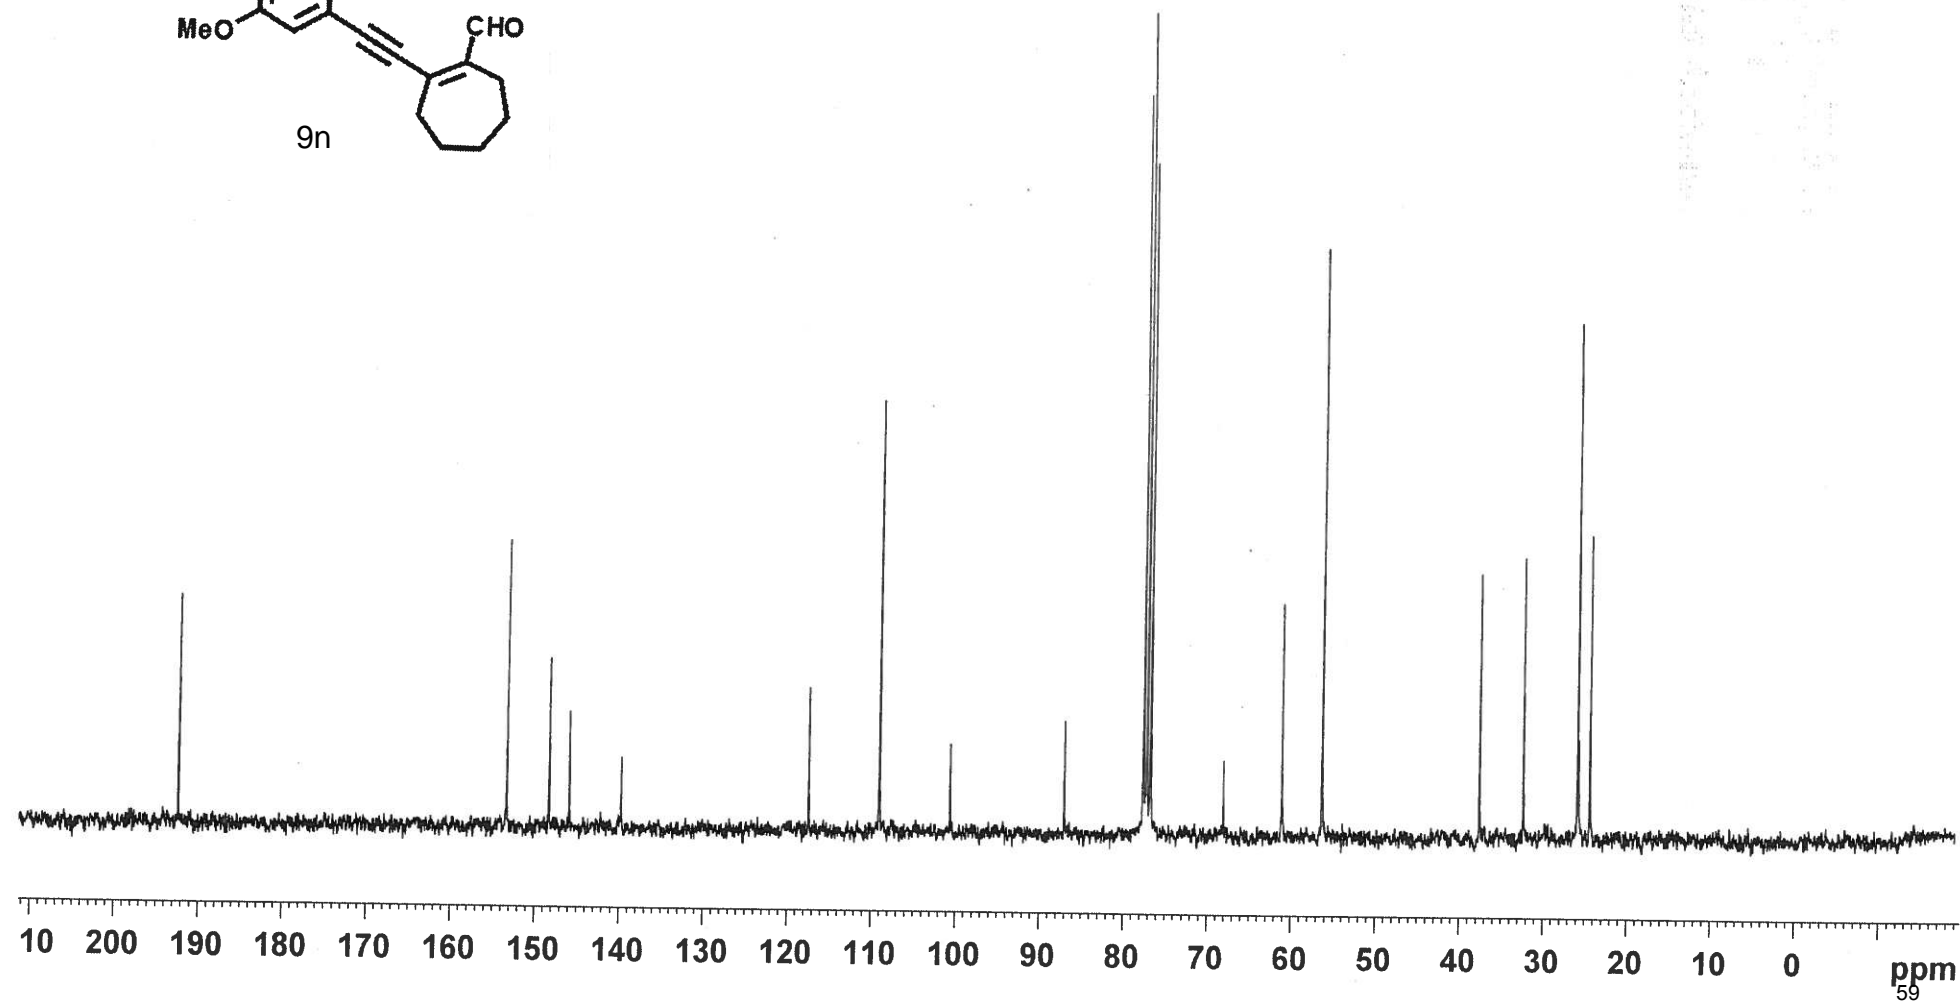

RosmarDerivative-I  
Experiment 3 Topspin 500  
Tuesday 07 December 2010

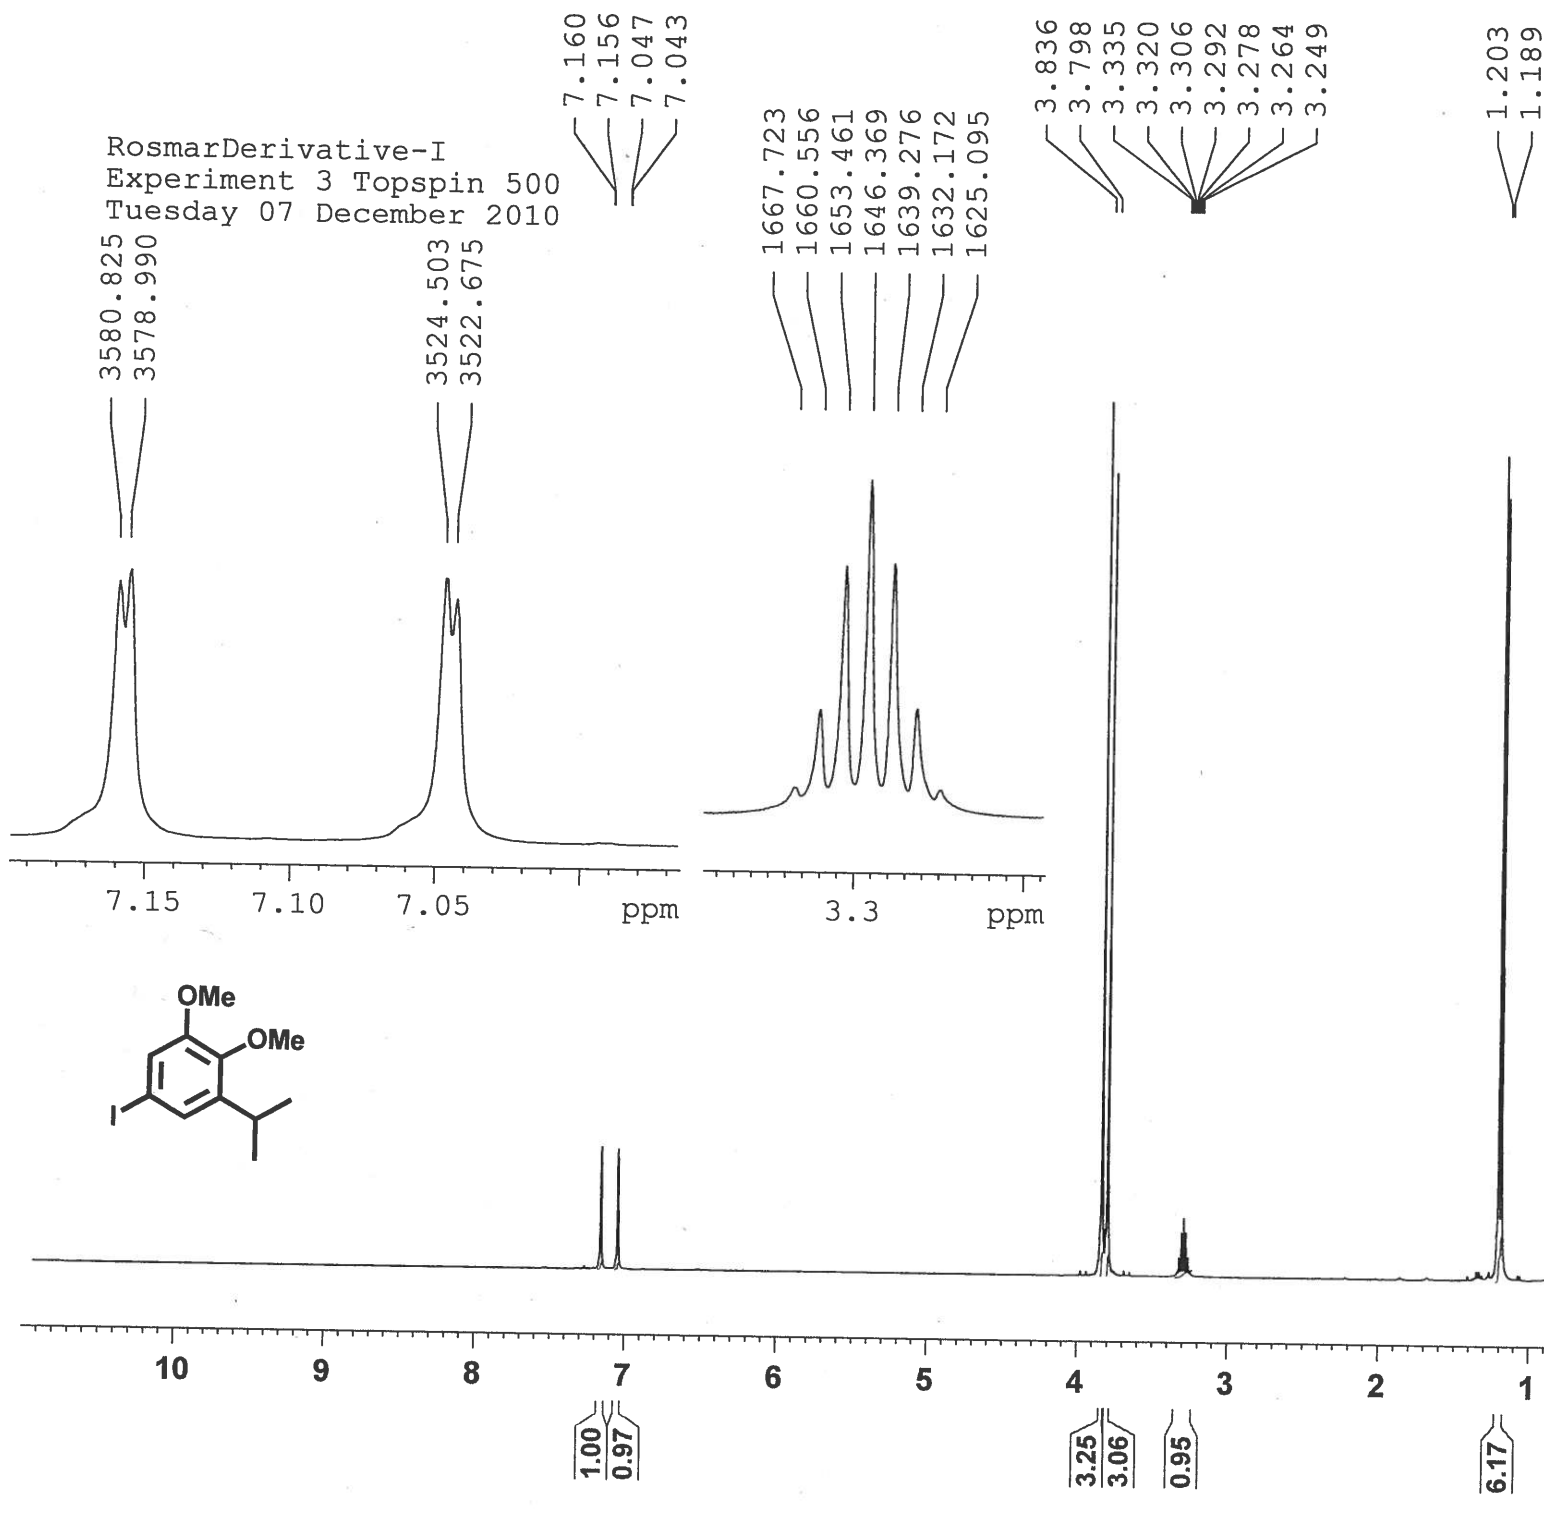

Current Data Parameters  
NAME RosmarDerivative-I  
EXPNO 3  
PROCNO 1

F2 - Acquisition Parameters  
Date 20101207  
Time 22.45  
INSTRUM spect  
PROBHD 5 mm PABBO BB/  
PULPROG zgpg30  
TD 32768  
SOLVENT H2O  
NS 8  
DS 2  
SWH 10964.912 Hz  
FIDRES 0.334623 Hz  
AQ 1.4943165 sec  
RG 20.2  
DW 45.600 usec  
DE 6.50 usec  
TE 293.2 K  
D1 2.00000000 sec  
d12 0.00002000 sec  
D16 0.00020000 sec  
TD0 1

===== CHANNEL f1 =====  
NUC1 1H  
P1 14.80 usec  
p2 29.60 usec  
P12 2000.00 usec  
PL0 120.00 dB  
PL1 -1.40 dB  
SFO1 500.1300000 MHz  
SP1 35.19 dB  
SPNAM1 Squa100.1000  
SPOAL1 0.500  
SPOFFS1 0.00 Hz

===== GRADIENT CHANNEL =====  
GPNAM1 SINE.100  
GPNAM2 SINE.100  
GPZ1 31.00 %  
GPZ2 11.00 %  
P16 1000.00 usec

F2 - Processing parameters  
SI 32768  
SF 500.130000 MHz  
WDW EM  
SSB 0  
LB 1.00 Hz  
GB 0  
PC 1.00  
60



RosmarDerivative-I  
 Experiment 4 13C  
 Topspin 500  
 Tuesday 07 December 2010

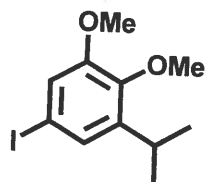

153.39  
 146.40  
 144.71  
 127.84  
 119.06  
 87.33  
 50.95  
 55.98  
 26.71  
 23.41

Current Data Parameters  
 NAME RosmarDerivative-I  
 EXPNO 4  
 PROCNO 1

F2 - Acquisition Parameters  
 Date\_ 20101207  
 Time 22.54  
 INSTRUM spect  
 PROBHD 5 mm PABBO BB/  
 PULPROG zgpg30  
 TD 16384  
 SOLVENT CDCl3  
 NS 85  
 DS 4  
 SWH 30030.029 Hz  
 FIDRES 1.832888 Hz  
 AQ 0.2728603 sec  
 RG 1625.5  
 DW 16.650 usec  
 DE 6.50 usec  
 TE 295.2 K  
 D1 1.00000000 sec  
 d11 0.03000000 sec  
 DELTA 0.89999998 sec  
 TDO 1

===== CHANNEL f1 =====  
 NUC1 13C  
 P1 9.50 usec  
 PL1 -0.70 dB  
 SFO1 125.7702890 MHz

===== CHANNEL f2 =====  
 CPDPRG2 waltz16  
 NUC2 1H  
 PCPD2 70.00 usec  
 PL2 -1.20 dB  
 PL12 12.30 dB  
 PL13 15.30 dB  
 SFO2 500.1325010 MHz

F2 - Processing parameters  
 SI 32768  
 SF 125.7577890 MHz  
 WDW EM  
 SSB 0  
 LB 2.00 Hz  
 GB 0  
 PC 1.00

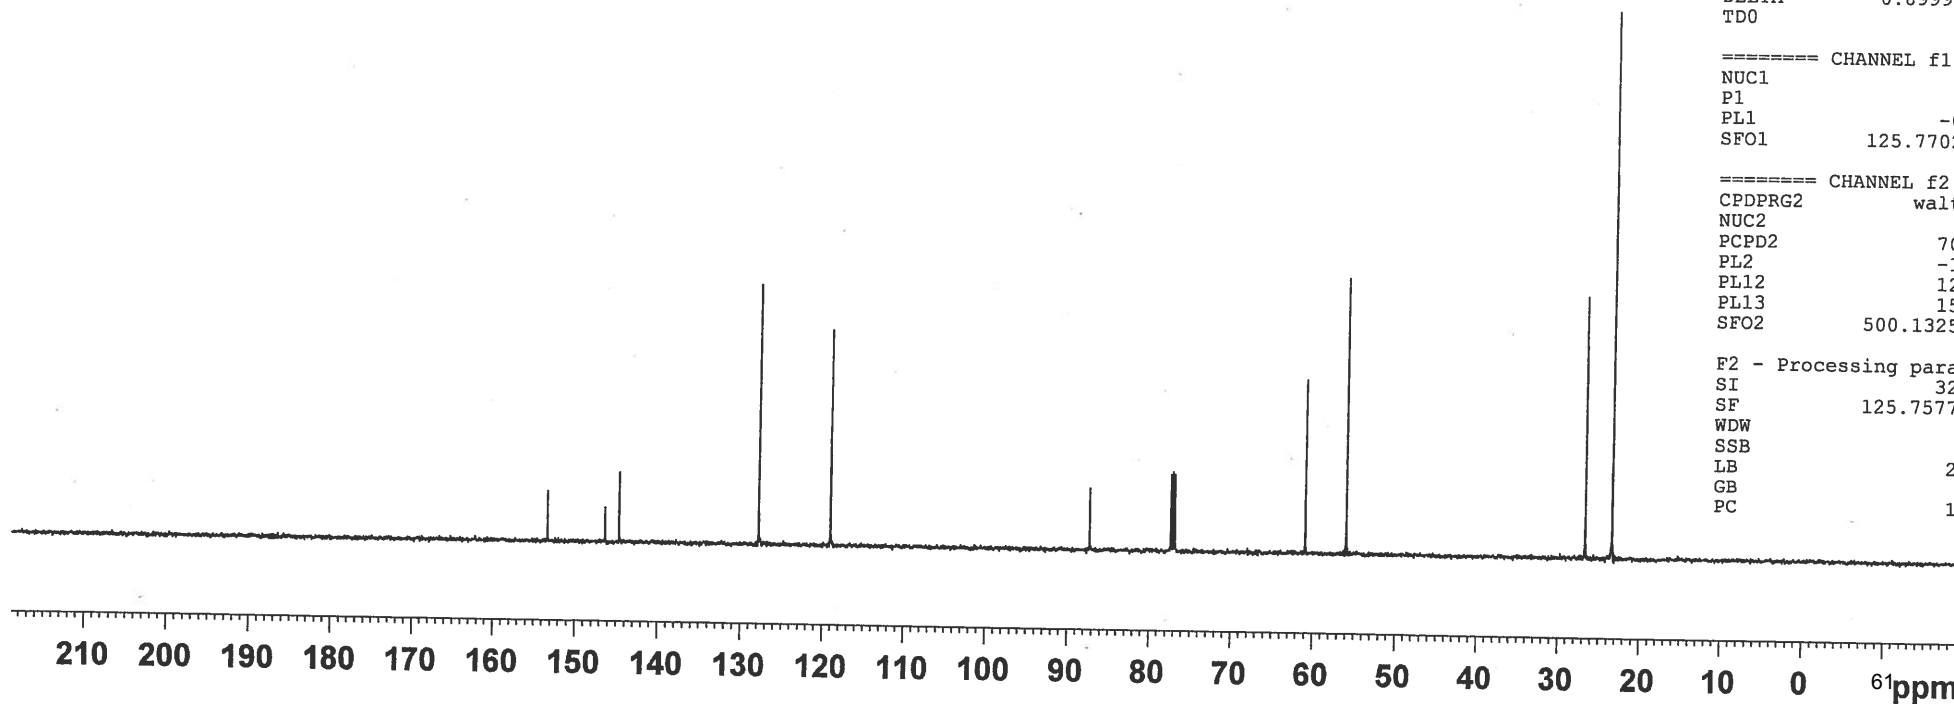

RosmarDerivative-TMS  
 Experiment 34  
 Topsisn 500  
 Thursday 11 November 2010

7.003  
 6.999  
 6.871  
 6.868  
 3436.579  
 3434.726  
 502.410  
 500.561

3.861  
 3.823  
 3.359  
 3.345  
 3.331  
 3.317  
 3.303  
 3.289  
 3.276

1.217  
 1.204  
 0.267

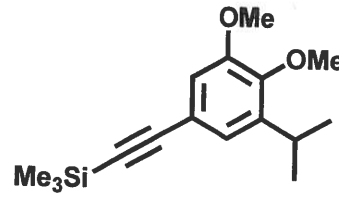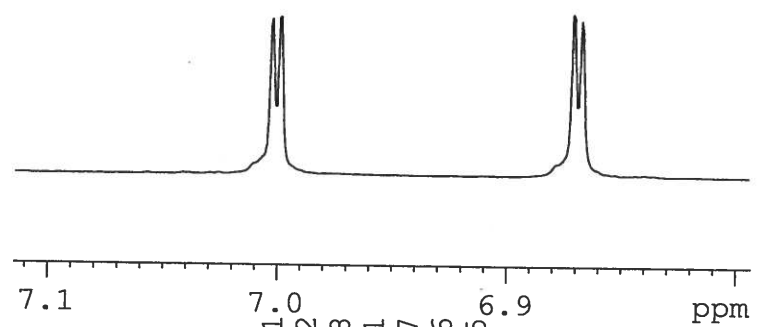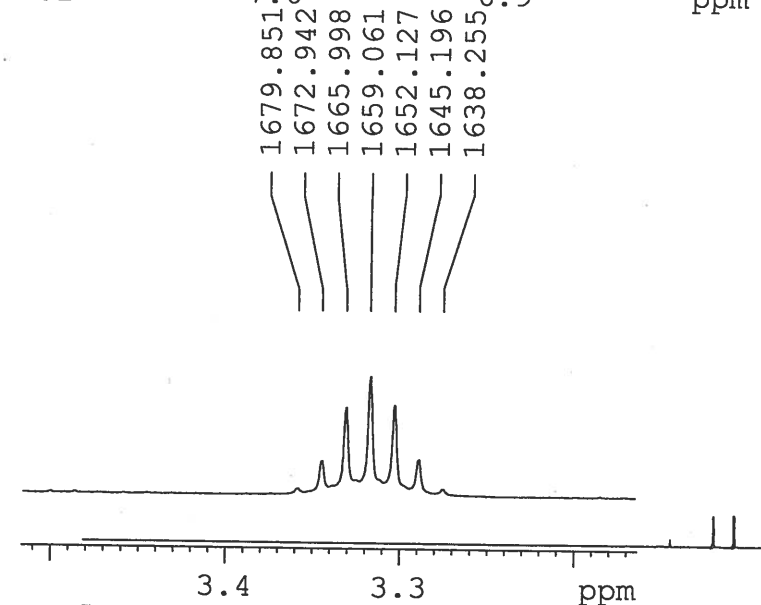

Current Data Parameters  
 NAME RosmarDerivative-TMS  
 EXPNO 4  
 PROCNO 1

F2 - Acquisition Parameters  
 Date\_ 20101111  
 Time\_ 14.31  
 INSTRUM spect  
 PROBHD 5 mm PABBO BB/  
 PULPROG zg  
 TD 65536  
 SOLVENT CDC13  
 NS 8  
 DS 2  
 SWH 10330.578 Hz  
 FIDRES 0.157632 Hz  
 AQ 3.1720407 sec  
 RG 57  
 DW 48.400 usec  
 DE 6.50 usec  
 TE 298.2 K  
 D1 1.00000000 sec  
 TD0 1

===== CHANNEL f1 =====  
 NUC1 1H  
 P1 14.80 usec  
 PL1 -1.40 dB  
 SFO1 500.1330885 MHz

F2 Processing parameters  
 SI 32768  
 SF 500.1300159 MHz  
 WDW no  
 SSB 0  
 LB 0.00 Hz  
 GB 0  
 PC 1.00

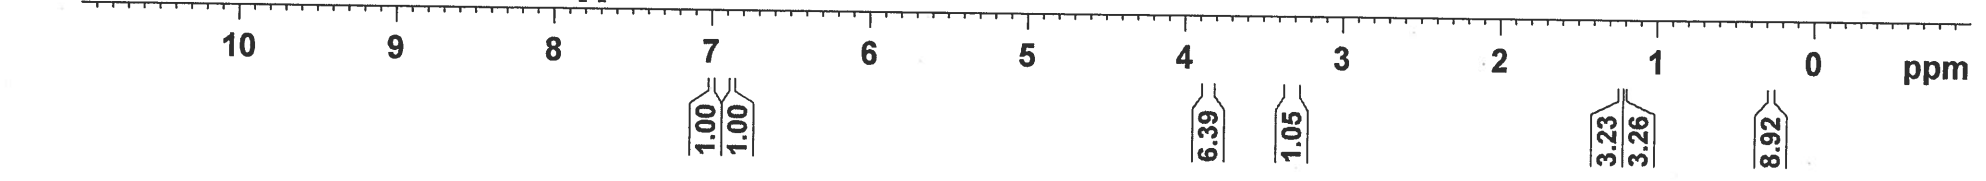

## RosmarDerivative-TMS

Experiment 5 -13C

Topsin 500

Thursday 11 November 2010

152.21

147.20

142.51

122.84

118.38

115.25

105.53

92.62

77.30  
77.04  
76.75

60.99

55.76

26.75

23.34

0.06

Current Data Parameters  
NAME RosmarDerivative-TMS  
EXPNO 5  
PROCNO 1

F2 - Acquisition Parameters  
Date 20101111  
Time 17.39  
INSTRUM spect  
PROBHD 5 mm PABBO BB/  
PULPROG zgpg30  
TD 16384  
SOLVENT CDCl3  
NS 633  
DS 4  
SWH 30030.029 Hz  
FIDRES 1.832888 Hz  
AQ 0.2728603 sec  
RG 3251  
DW 16.650 usec  
DE 6.50 usec  
TE 300.2 K  
D1 1.00000000 sec  
d11 0.03000000 sec  
DELTA 0.89999998 sec  
TD0 1

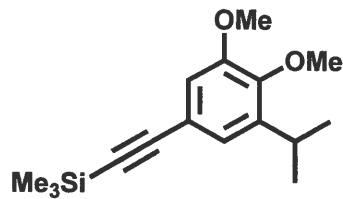

===== CHANNEL f1 =====  
NUC1 13C  
P1 9.50 usec  
PL1 -0.70 dB  
SFO1 125.7702890 MHz

===== CHANNEL f2 =====  
CPDPRG2 waltz16  
NUC2 1H  
PCPD2 70.00 usec  
PL2 -1.20 dB  
PL12 12.30 dB  
PL13 15.30 dB  
SFO2 500.1325010 MHz

F2 - Processing parameters  
SI 32768  
SF 125.7577890 MHz  
WDW EM  
SSB 0  
LB 2.00 Hz  
GB 0  
PC 1.00

200 180 160 140 120 100 80 60 40 20 0 63 ppm

RosmarDerivative-CCH  
Experiment 1  
Tospin 500  
Tuesday 16 November 2010

Current Data Parameters  
NAME RosmarDerivative-CCH  
EXPNO 1  
PROCNO 1

F2 - Acquisition Parameters

Date\_ 20101116  
Time 22.28  
INSTRUM spect  
PROBHD 5 mm PABBO BB/  
PULPROG zg  
TD 65536  
SOLVENT C6D6  
NS 8  
DS 2  
SWH 10330.578 Hz  
FIDRES 0.157632 Hz  
AQ 3.1720407 sec  
RG 20.2  
DW 48.400 usec  
DE 6.50 usec  
TE 295.2 K  
D1 1.00000000 sec  
TD0 1

===== CHANNEL f1 =====

NUC1 1H  
P1 15.00 usec  
PL1 0.50 dB  
SFO1 500.1330880 MHz

F2 - Processing parameters

SI 32768  
SF 500.1300186 MHz  
WDW no  
SSB 0  
LB 0.00 Hz  
GB 0  
PC 1.00

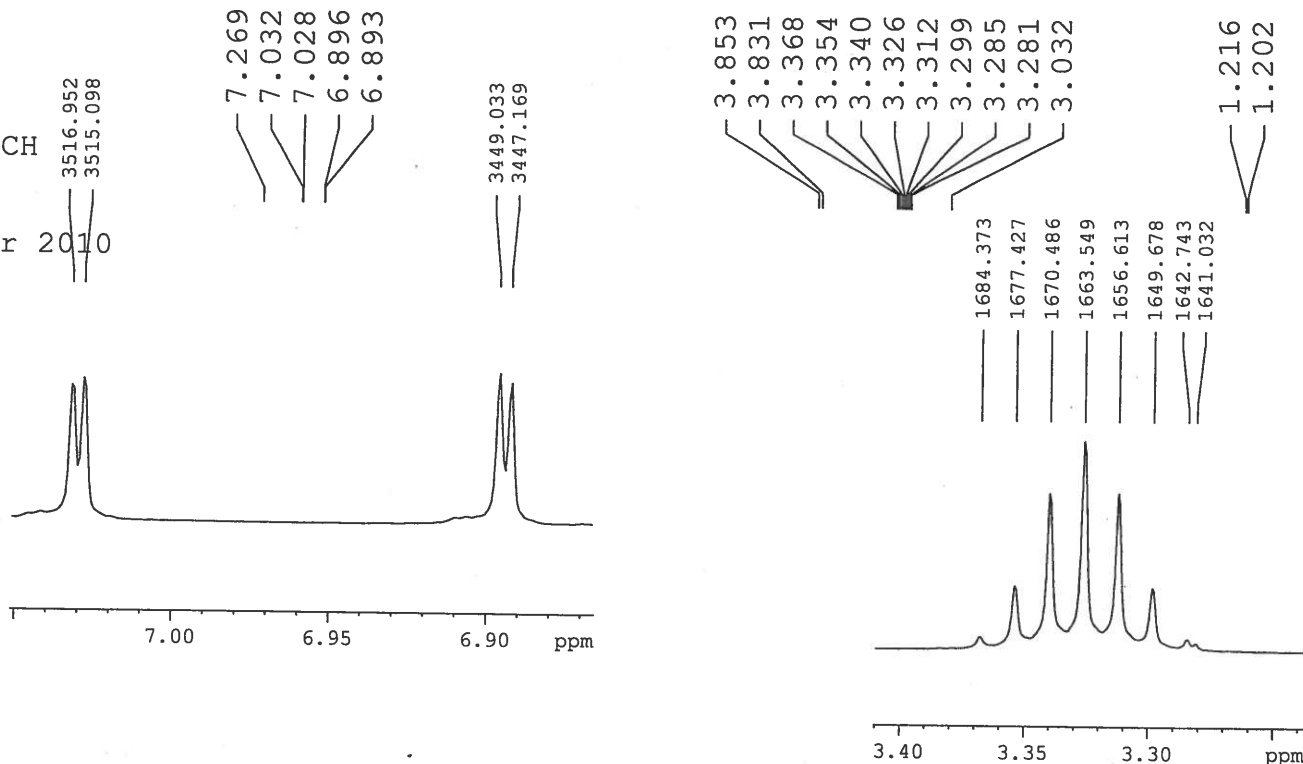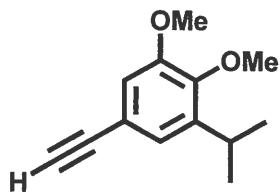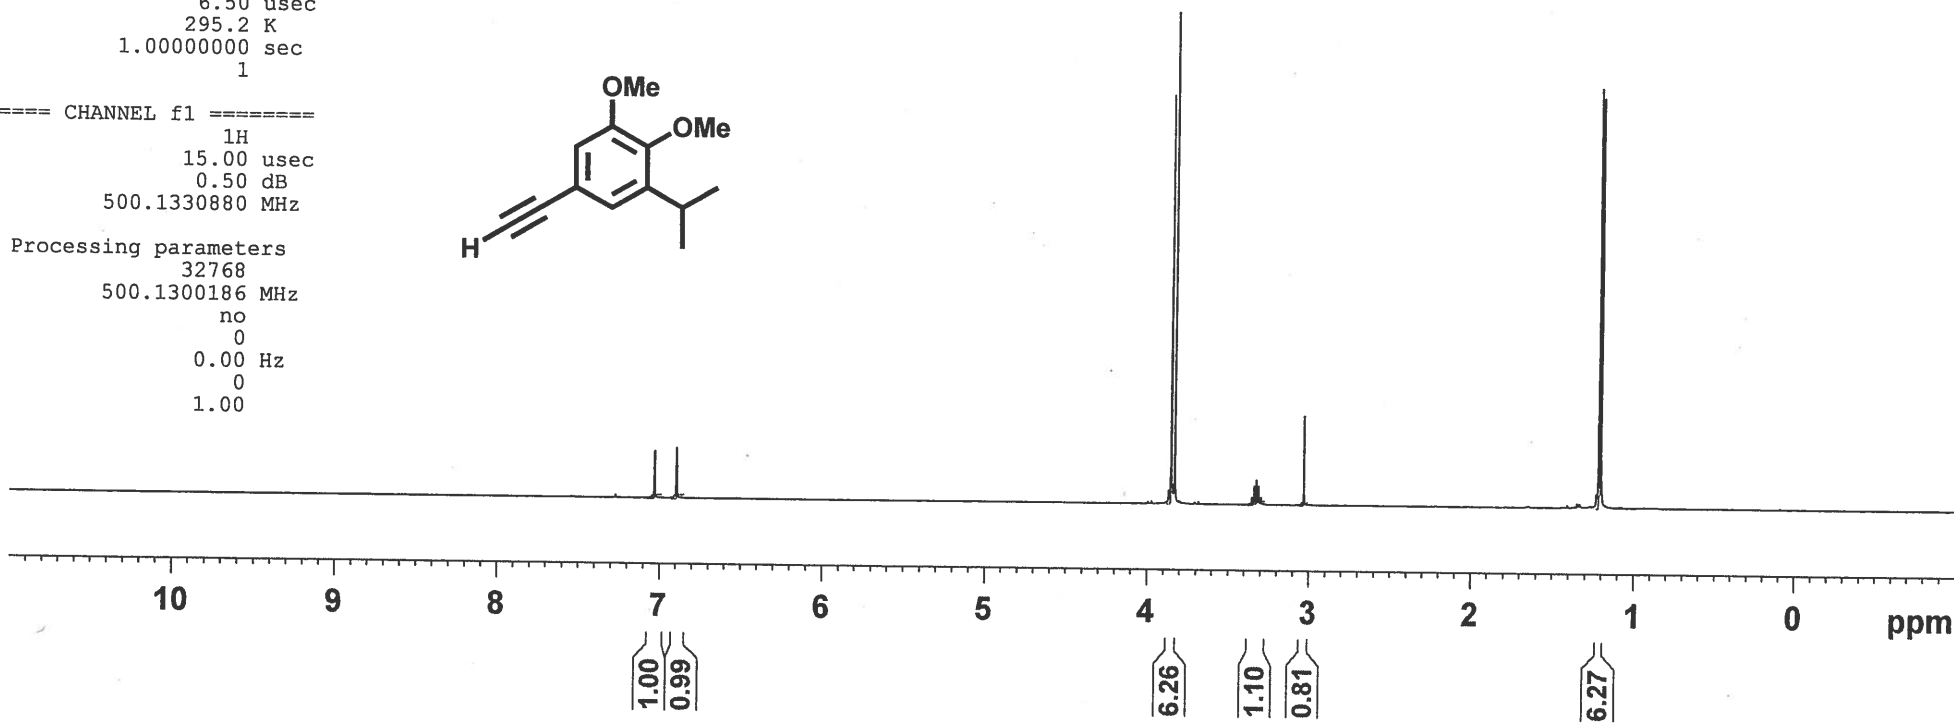

RosmarDerivative-CCH  
 Experiment 3 13C  
 Topsin 500  
 Tuesday 16 November 2010

152.31  
 147.36  
 142.65

122.86  
 117.36  
 115.35

84.06

75.92

60.97

55.76

28.73

23.24

Current Data Parameters  
 NAME RosmarDerivative-CCH  
 EXPNO 3  
 PROCNO 1

F2 - Acquisition Parameters  
 Date\_ 20101116  
 Time\_ 23.47  
 INSTRUM spect  
 PROBHD 5 mm PABBO BB/  
 PULPROG zgpg30  
 TD 16384  
 SOLVENT CDC13  
 NS 207  
 DS 4  
 SWH 30030.029 Hz  
 FIDRES 1.832888 Hz  
 AQ 0.2728603 sec  
 RG 2298.8  
 DW 16.650 usec  
 DE 6.50 usec  
 TE 297.2 K  
 D1 1.00000000 sec  
 d11 0.03000000 sec  
 DELTA 0.89999998 sec  
 TD0 1

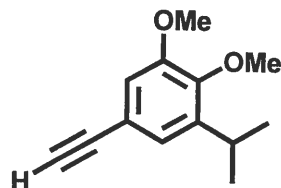

===== CHANNEL f1 =====  
 NUC1 13C  
 P1 9.50 usec  
 PL1 -0.70 dB  
 SFO1 125.7702890 MHz

===== CHANNEL f2 =====  
 CPDPRG2 waltz16  
 NUC2 1H  
 PCPD2 70.00 usec  
 PL2 -1.20 dB  
 PL12 12.30 dB  
 PL13 15.30 dB  
 SFO2 500.1325010 MHz

F2 - Processing parameters  
 SI 32768  
 SF 125.7577890 MHz  
 WDW EM  
 SSB 0  
 LB 2.00 Hz  
 GB 0  
 PC 1.40

200 180 160 140 120 100 80 60 40 20 0 65 ppm

RosmarDerivative-CC-CyclohexeneCHO  
 Experiment 3 Topspin 500  
 Tuesday 07 December 2010

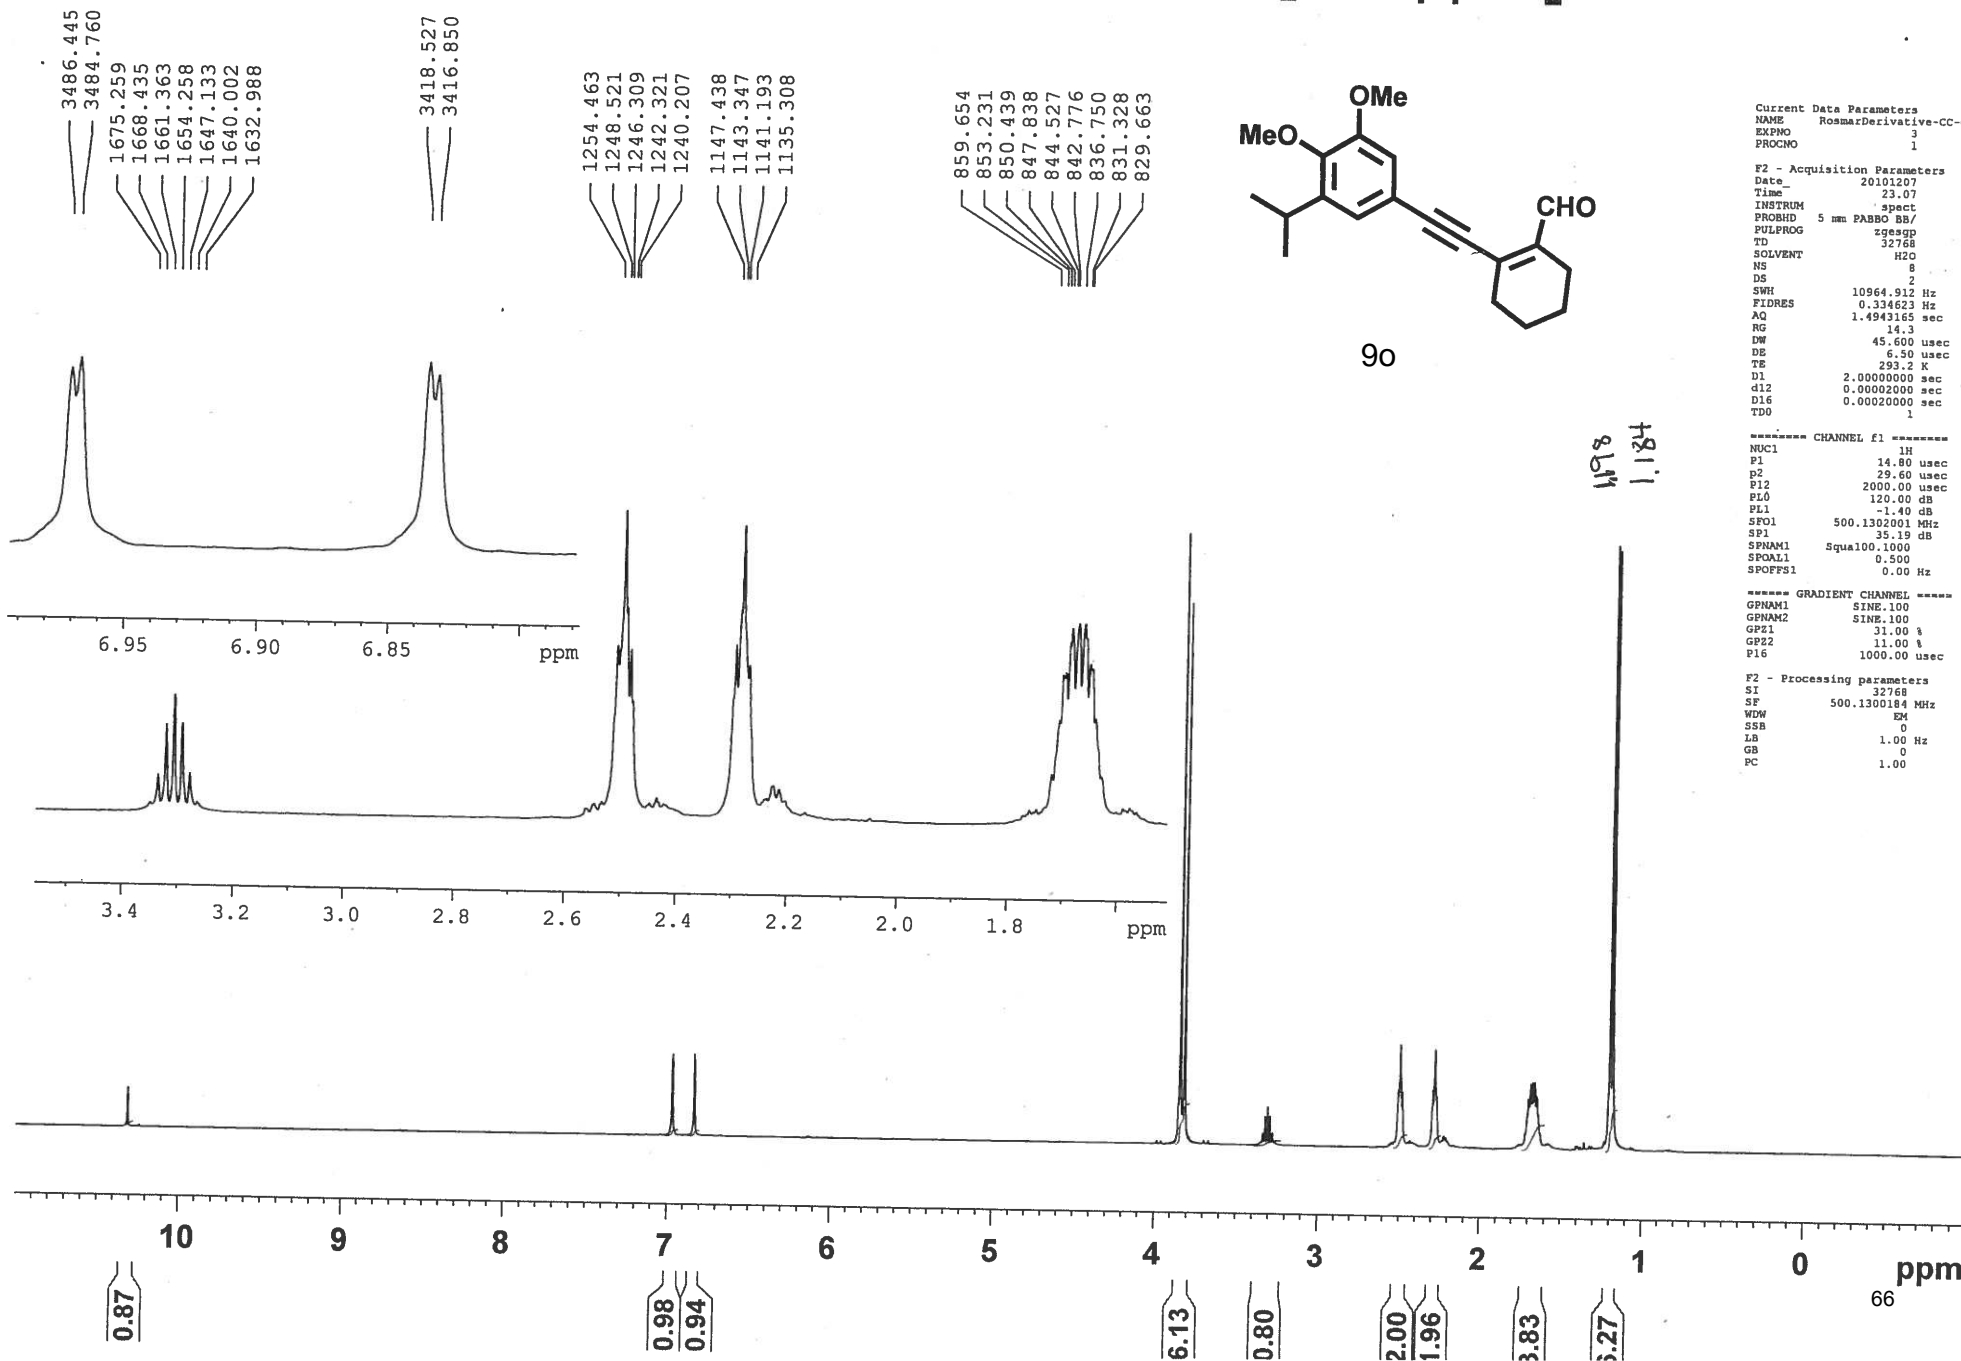

RosmarDerivative-CC-CyclohexeneCHO  
 Experiment 4 13C  
 Topspin 500  
 Tuesday 07 December 2010

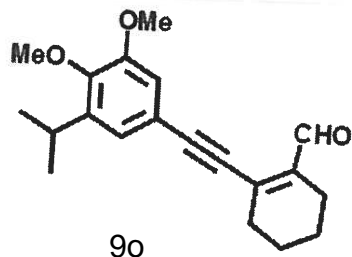

152.45  
 147.65  
 142.84  
 142.21  
 140.30

122.56  
 117.58  
 113.78

99.15

85.23

69.98  
 55.60

32.41  
 26.79  
 23.31  
 22.10  
 21.33  
 21.11

Current Data Parameters  
 NAME RosmarDerivative-CC-CyclohexeneCHO  
 EXPNO 4  
 PROCNO 1

F2 - Acquisition Parameters  
 Date 20101207  
 Time 23.36  
 INSTRUM spect  
 PROBHD 5 mm PABBO BB/  
 PULPROG zgpg30  
 TD 16384  
 SOLVENT CDCl3  
 NS 8  
 DS 4  
 SWH 30030.029 Hz  
 FIDRES 1.832888 Hz  
 AQ 0.2728603 sec  
 RG 1149.4  
 DW 16.650 usec  
 DE 6.50 usec  
 TE 294.2 K  
 D1 1.00000000 sec  
 d11 0.03000000 sec  
 DELTA 0.89999998 sec  
 TDO 1

===== CHANNEL f1 =====  
 NUC1 13C  
 P1 9.50 usec  
 PL1 -0.70 dB  
 SFO1 125.7702890 MHz

===== CHANNEL f2 =====  
 CPDPRG2 waltz16  
 NUC2 1H  
 PCPD2 70.00 usec  
 PL2 -1.20 dB  
 PL12 12.30 dB  
 PL13 15.30 dB  
 SFO2 500.1325010 MHz

F2 - Processing parameters  
 SI 32768  
 SF 125.7577890 MHz  
 WDW EM  
 SSB 0  
 LB 2.00 Hz  
 GB 0  
 PC 1.40

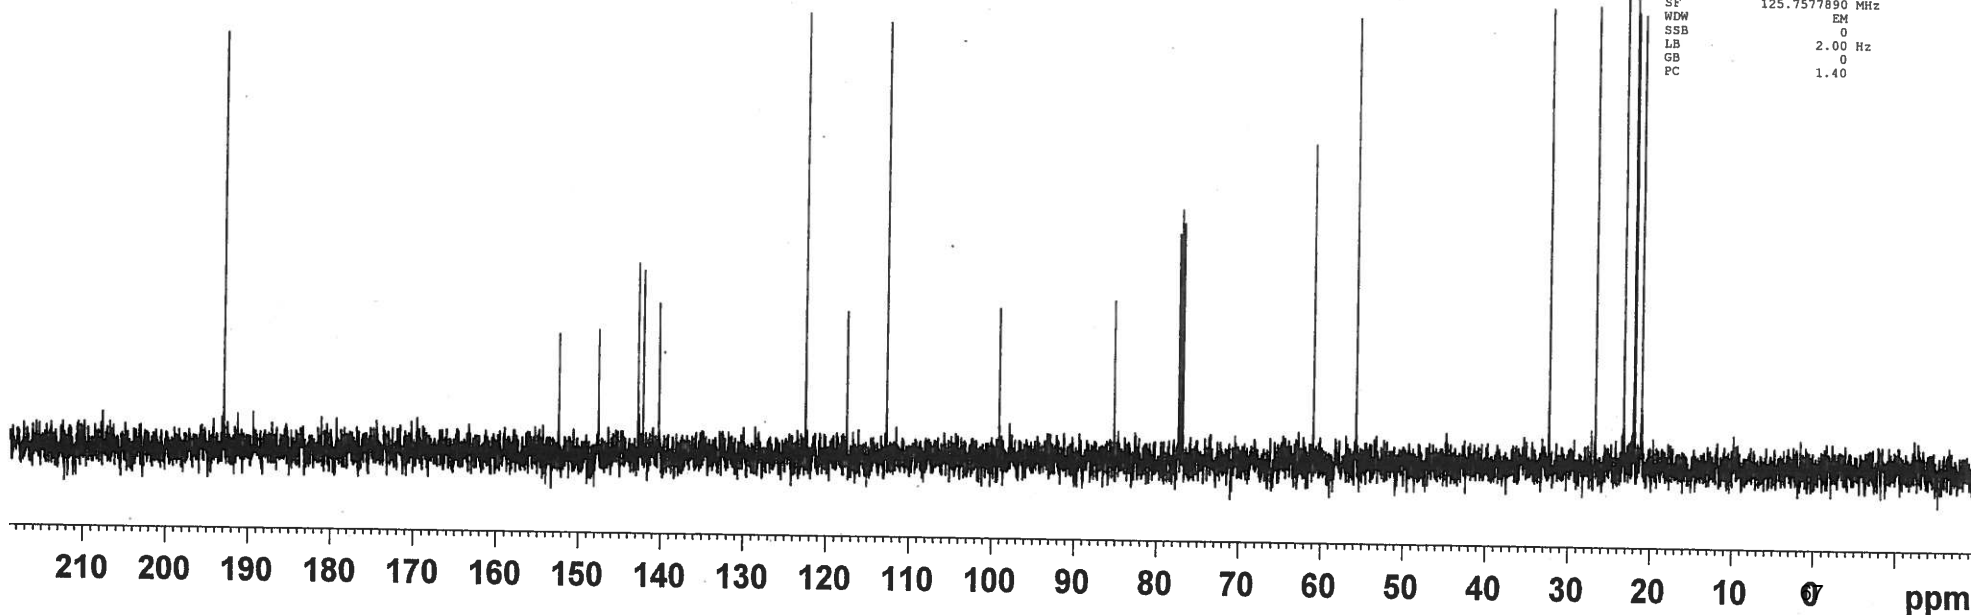

3767.870  
 3765.753  
 290  
 Thiophene-3-CC-Cyclohexene  
 Experiment 3 Topspin 5000  
 Wednesday 27 July 2011

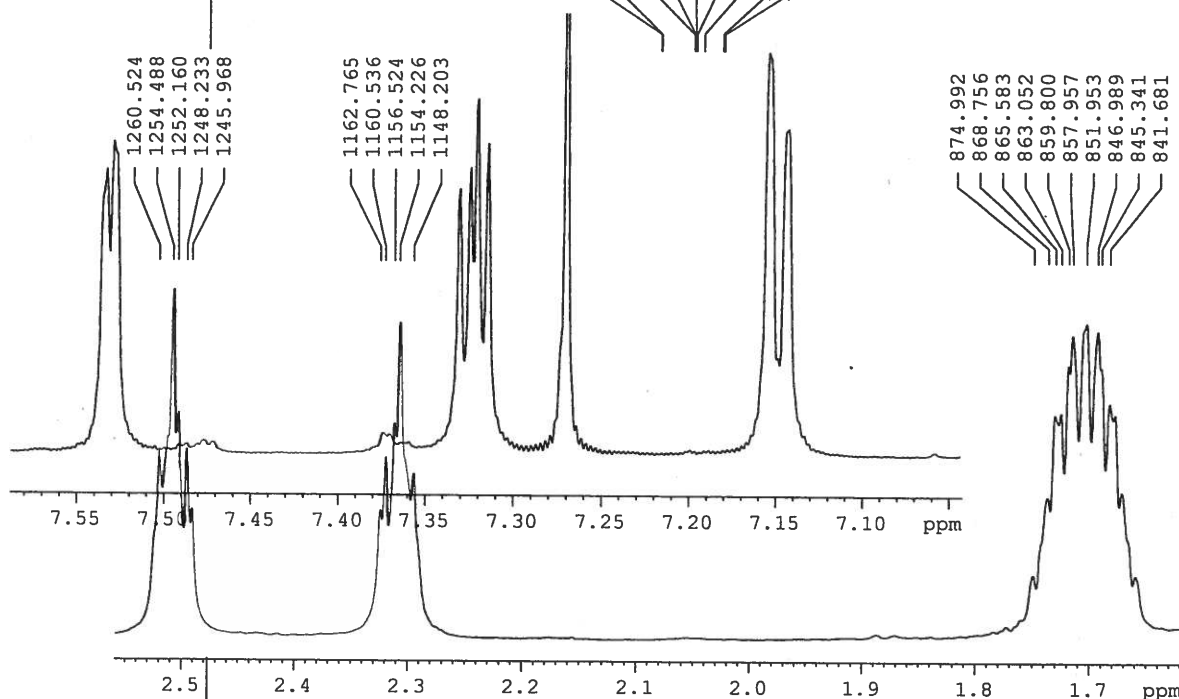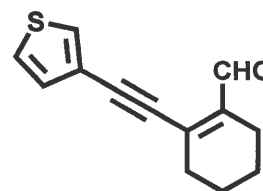

9p

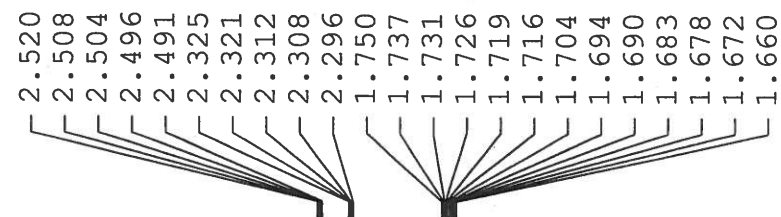

```
Current Data Parameters
NAME      Thiophene-3-CC-Cyclohexenecarbaldehyde
EXPNO      3
PROCNO     1
```

```

F2 - Acquisition Parameters
Date_      2011072
Time       11:54
INSTRUM    spect
PROBHD     5 mm PABBO BB/
PULPROG    zgpg30
TD         32768
SOLVENT    CDCl3
NS          8
DS          2
SWH         109664.912 Hz
FIDRES     0.334623 Hz
AQ         1.4943165 sec
RG          362
DE         45.600 usec
DW          6.50 usec
TE         295.2 K
D1         2.00000000 sec
d12        0.00002000 sec
D16        0.00020000 sec
TPO         1

```

```

      CHANNEL f1
NUC1              1H
P1                14.80   usec
p2               29.60   usec
P12             2000.00   usec
PL0            120.00    dB
PL1           -1.40     dB
SFO1          500.1318505 MHz
SP1           35.19     dB
SPNAM1         Squa100.1000
SPOAL1        0.500
SPOFFS1       0.00 Hz

```

```

      GRADIENT CHANNEL
GPNAM1          SINE.100
GPNAM2          SINE.100
GPZ1            31.00 %
GPZ2            11.00 +
P16             1000.00 usoc

```

```
F2 - Processing parameters
SI                      32768
SF                      500.1300184 MHz
WDW                      EM
SSB                      0
LB                      0.75 Hz
GB                      0
PC                      1.00
```

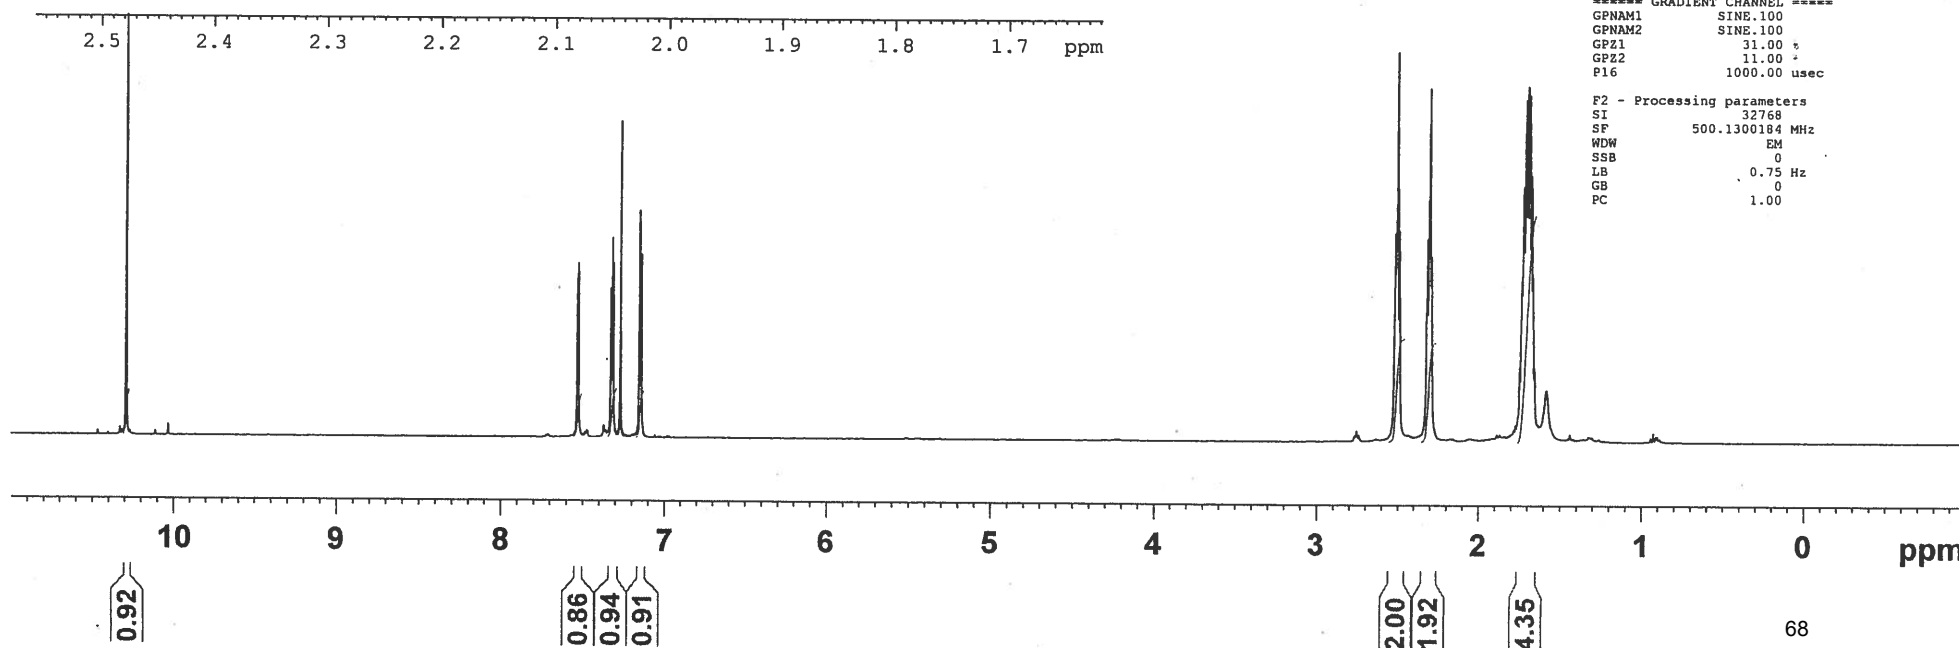



Thiophene-3-CC-Cyclohexenecarbaldehyde  
 Experiment 2  
 pspn 300 Ultra  
 esday 26 July 2011

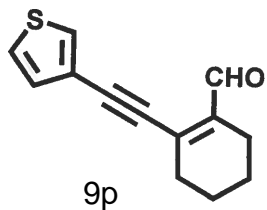

```

NAME      Thiophene-3-CC-Cyclohexenecarbaldehyde
EXPNO     2
PROCNO    1
Date_     20110726
Time      16.58
INSTRUM   spect
PROBHD    5 mm PABBO BB-
PULPROG   zgpg30
TD        16384
SOLVENT   CDCl3
NS         1317
DS         4
SWH        17985.611 Hz
FIDRES     1.097755 Hz
AQ         0.455552 sec
RG         20642.5
DW         27.800 usec
DE         6.00 usec
TE         295.5 K
D1         1.00000000 sec
D11        0.03000000 sec
TD0        1
  
```

```

===== CHANNEL f1 =====
NUC1      13C
P1        11.25 usec
PL1       0.00 dB
SFO1      75.4752953 MHz
  
```

```

===== CHANNEL f2 =====
CPDPRG2   waltz16
NUC2      1H
PCPD2     80.00 usec
PL2       0.00 dB
PL12      16.55 dB
PL13      24.00 dB
SFO2      300.1312005 MHz
SI         9182
SF        75.4677423 MHz
WDW        EM
SSB        0
LB         2.50 Hz
GB         0
PC         1.40
  
```

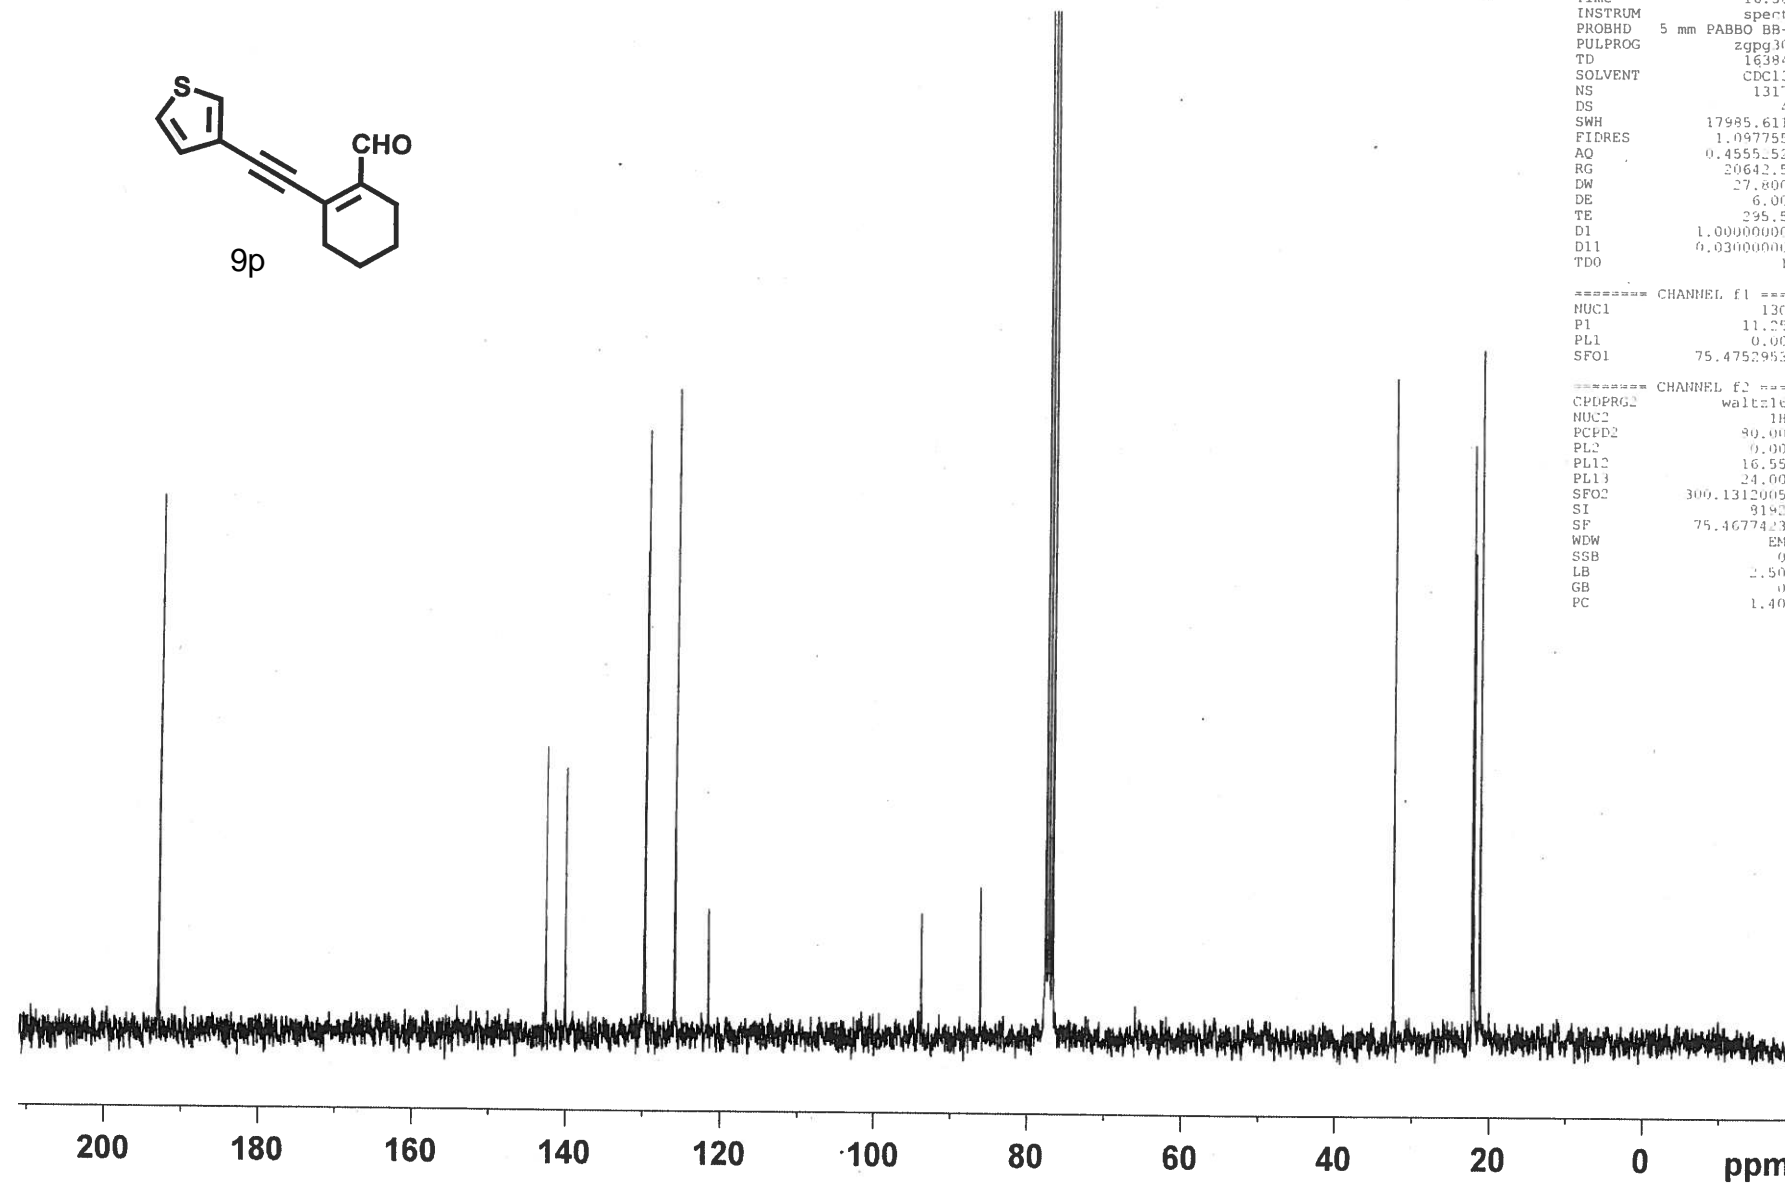

Phenyl-CC-CyclopenteneOAc  
 Experiment 2  
 Topsin 500  
 Wednesday 15 September 2010

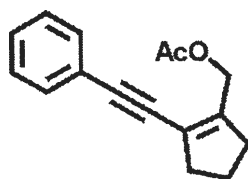

10a

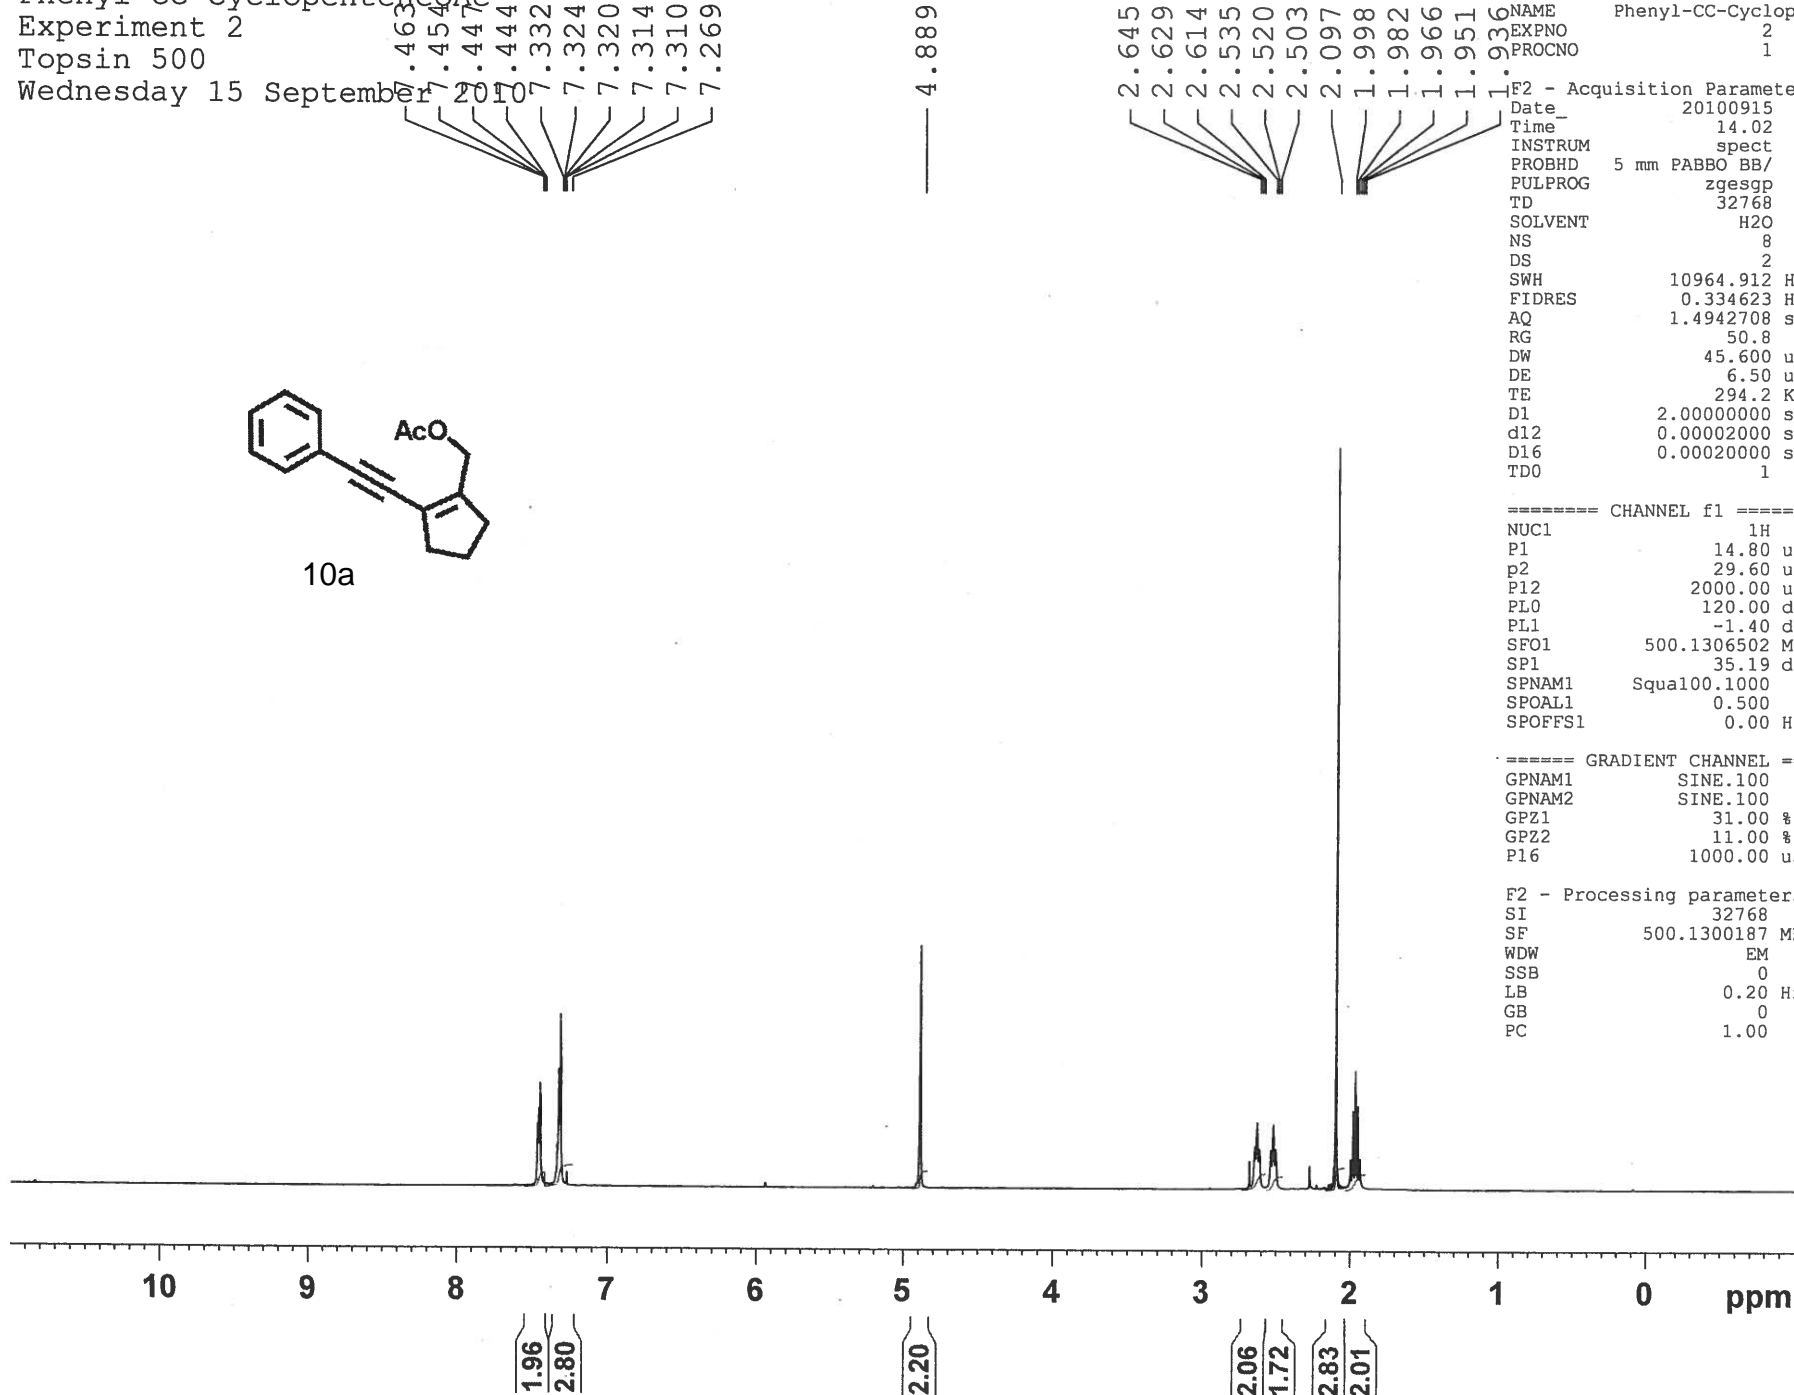

Current Data Parameters  
 NAME Phenyl-CC-CyclopenteneOAc  
 EXPNO 2  
 PROCNO 1

F2 - Acquisition Parameters  
 Date\_ 20100915  
 Time 14.02  
 INSTRUM spect  
 PROBHD 5 mm PABBO BB/  
 PULPROG zgpg30  
 TD 32768  
 SOLVENT H2O  
 NS 8  
 DS 2  
 SWH 10964.912 Hz  
 FIDRES 0.334623 Hz  
 AQ 1.4942708 sec  
 RG 50.8  
 DW 45.600 usec  
 DE 6.50 usec  
 TE 294.2 K  
 D1 2.00000000 sec  
 d12 0.00002000 sec  
 D16 0.00020000 sec  
 TD0 1

===== CHANNEL f1 =====  
 NUC1 1H  
 P1 14.80 usec  
 p2 29.60 usec  
 P12 2000.00 usec  
 PL0 120.00 dB  
 PL1 -1.40 dB  
 SFO1 500.1306502 MHz  
 SP1 35.19 dB  
 SPNAM1 Squa100.1000  
 SPOAL1 0.500  
 SPOFFS1 0.00 Hz

===== GRADIENT CHANNEL =====  
 GPNAM1 SINE.100  
 GPNAM2 SINE.100  
 GPZ1 31.00 %  
 GPZ2 11.00 %  
 P16 1000.00 usec

F2 - Processing parameters  
 SI 32768  
 SF 500.1300187 MHz  
 WDW EM  
 SSB 0  
 LB 0.20 Hz  
 GB 0  
 PC 1.00

Phenyl-CC-Cylcopentene methyl acetate 13C  
 Experiment 2  
 Ultra 300  
 Wednesday 15 September 2010

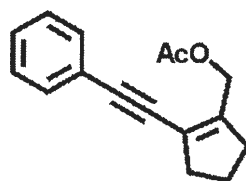

10a

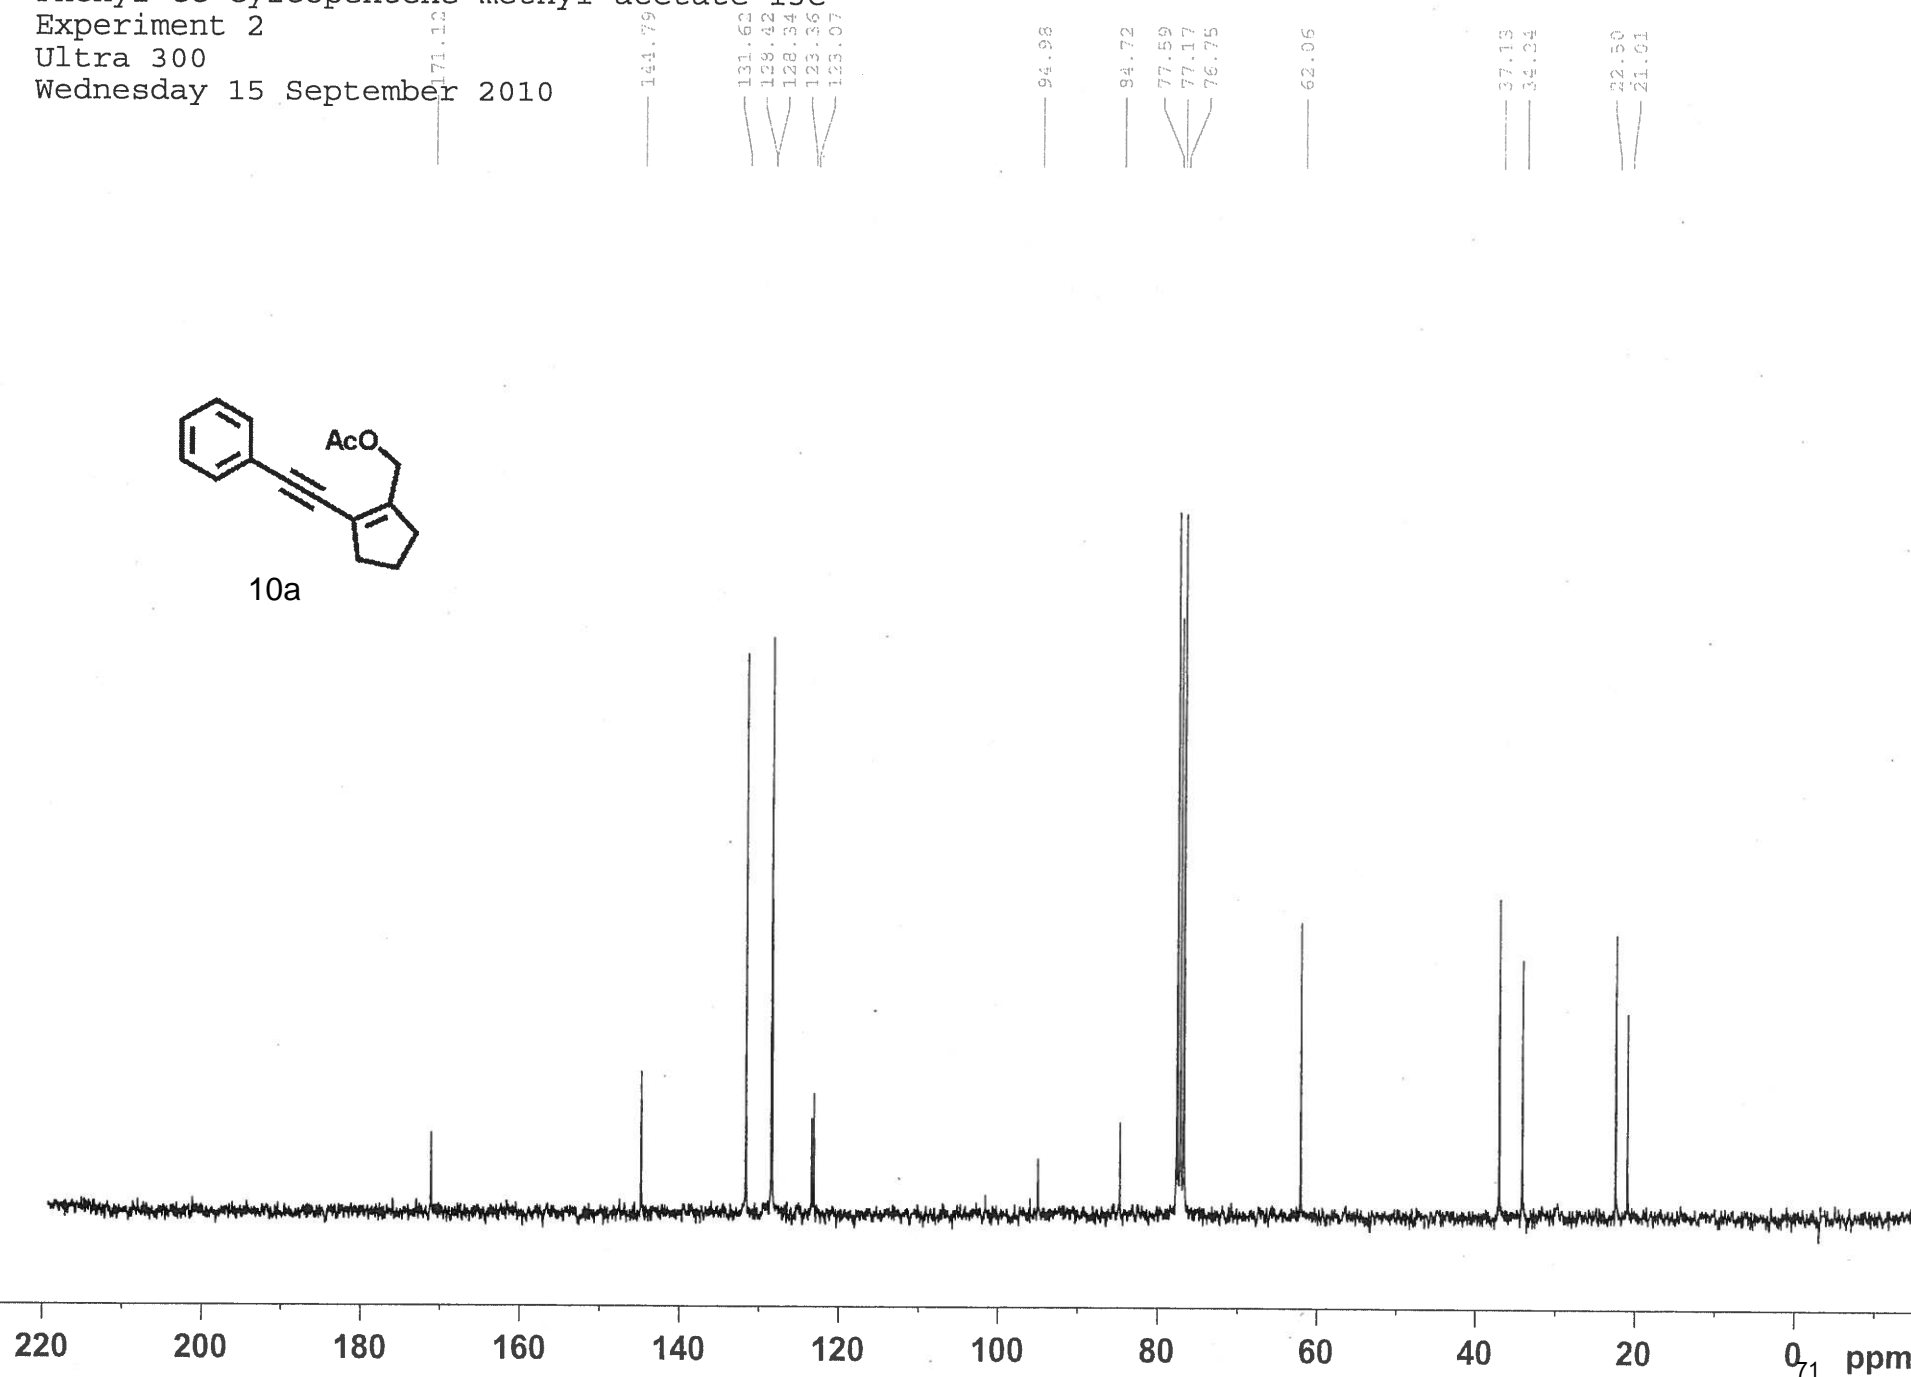

Phenyl-CC-Cyclohexeneacetate  
 Experiment 2  
 500 Topsin  
 Tuesday 25 May 2010

7.446  
7.441  
7.436  
7.430  
7.427  
7.334  
7.331  
7.325  
7.322  
7.315  
7.310  
7.304  
7.301  
7.297  
7.295  
7.292  
7.270

3723.975  
3721.244  
3719.167  
3716.178  
3714.330

3667.805  
3666.458  
3663.531  
3661.918  
3658.676  
3655.941  
3653.167  
3651.316  
3649.555  
3648.427  
3646.844  
3635.871

4.904

2.314  
2.185  
2.179  
2.177  
2.166  
2.161  
2.098  
1.716  
1.711  
1.699  
1.690  
1.684  
1.678  
1.674  
1.669  
1.657

Current Data Parameters  
 NAME Phenyl-CC-Cyclohexeneacetate  
 EXPNO 2  
 PROCNO 1

F2 - Acquisition Parameters  
 Date 20100525  
 Time 16.51  
 INSTRUM spect  
 PROBHD 5 mm PABBO BB/  
 PULPROG zgpg30  
 TD 32768  
 SOLVENT H2O  
 NS 8  
 DS 2  
 SWH 10964.912 Hz  
 FIDRES 0.334623 Hz  
 AQ 1.4942708 sec  
 RG 203.2  
 DW 45.600 usec  
 DE 6.50 usec  
 TE 296.2 K  
 D1 2.00000000 sec  
 d12 0.00002000 sec  
 D16 0.00020000 sec  
 TDO 1

===== CHANNEL f1 =====  
 NUC1 1H  
 P1 14.80 usec  
 p2 29.60 usec  
 P12 2000.00 usec  
 PL0 120.00 dB  
 PL1 -1.40 dB  
 SFO1 500.1306252 MHz  
 SP1 35.19 dB  
 SPNAM1 Squa100.1000  
 SFOAL1 0.500  
 SPOFFS1 0.00 Hz

===== GRADIENT CHANNEL =====  
 GPNAM1 SINE.100  
 GPNAM2 SINE.100  
 GPZ1 31.00 %  
 GPZ2 11.00 %  
 P16 1000.00 usec

F2 - Processing parameters  
 SI 32768  
 SF 500.1300186 MHz  
 WDW EM  
 SSB 0  
 LB 0.30 Hz  
 GB 0  
 PC 1.00

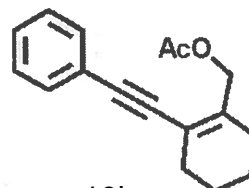

10b

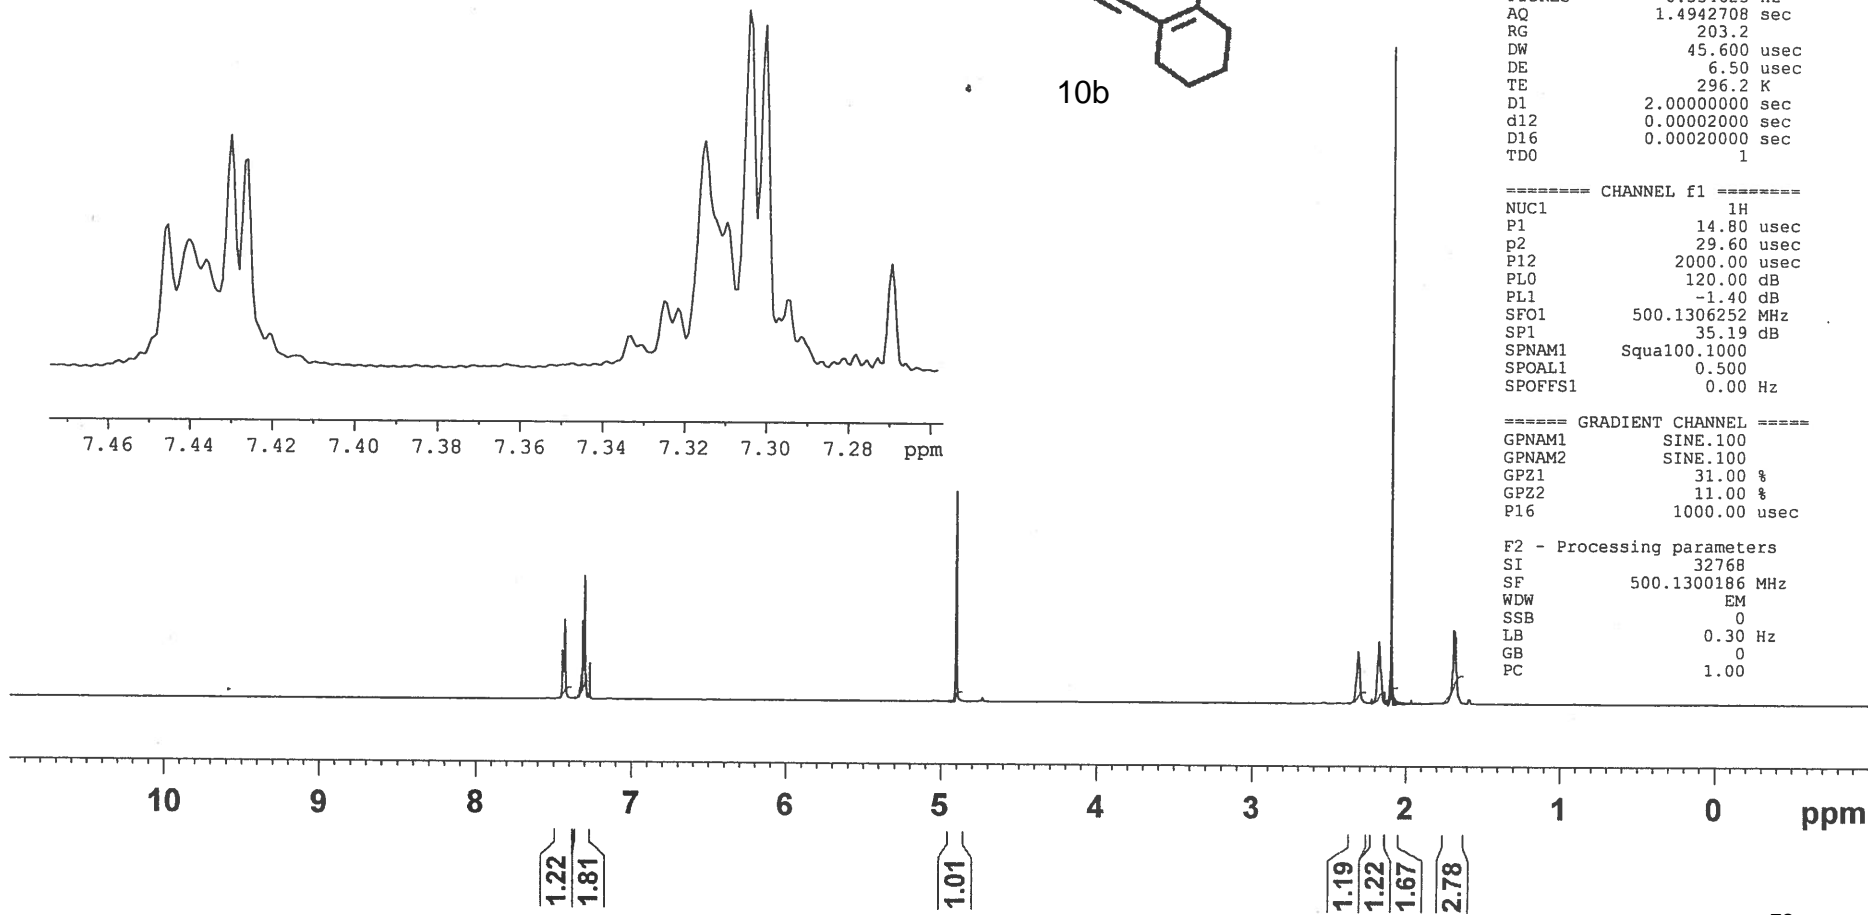

Phenyl-CC-Cyclohexeneacetate 13C  
300 ULtra  
Tuesday 25 May 2010

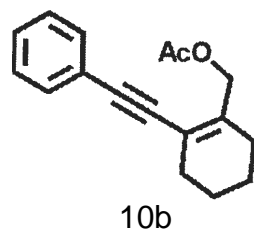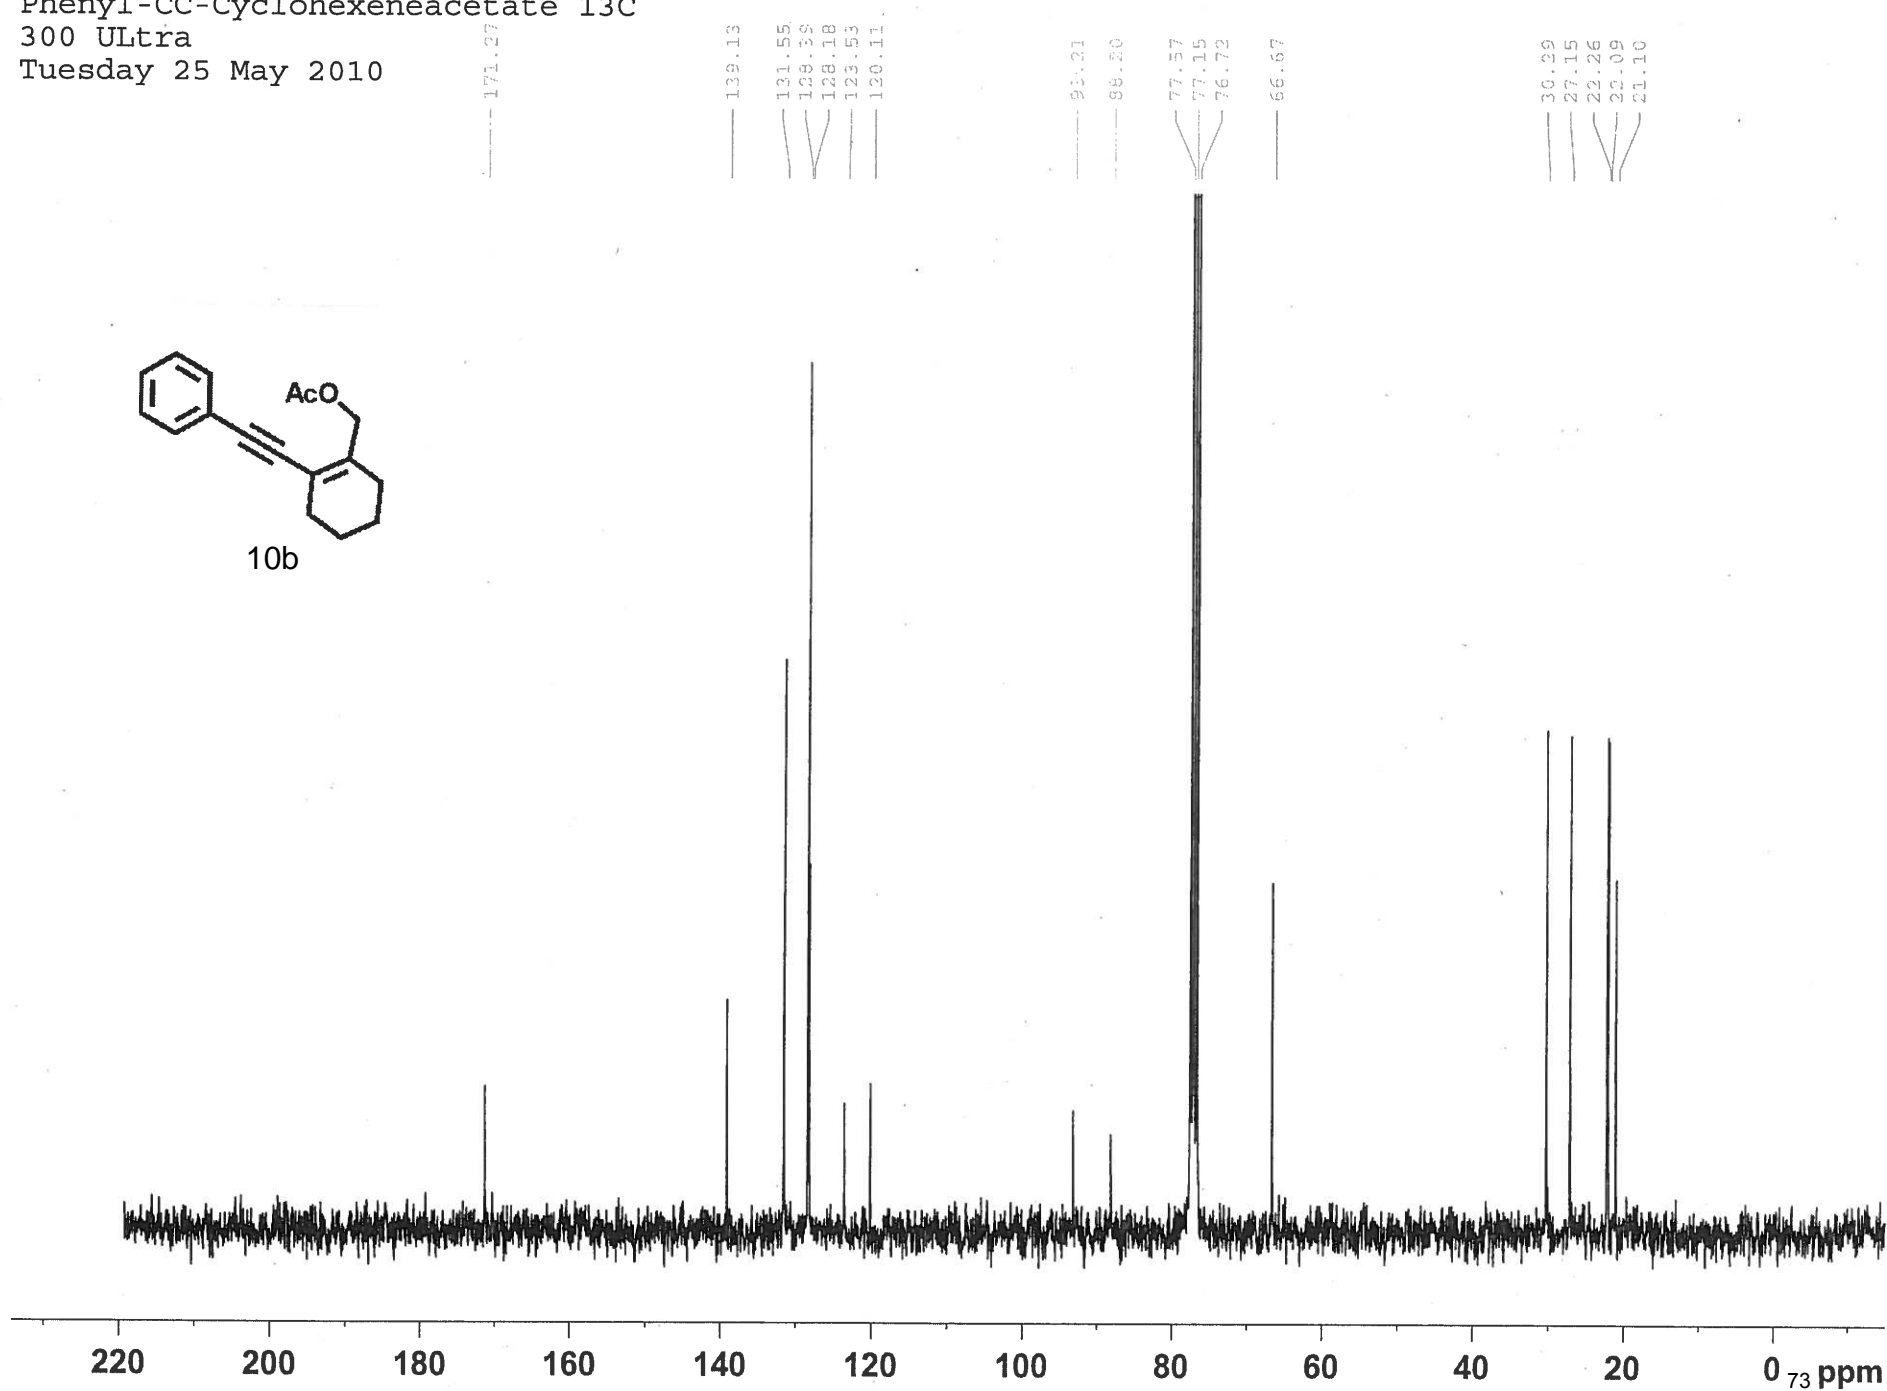

Anisole-3-Cyclohexene  
 500  
 13 July 2009

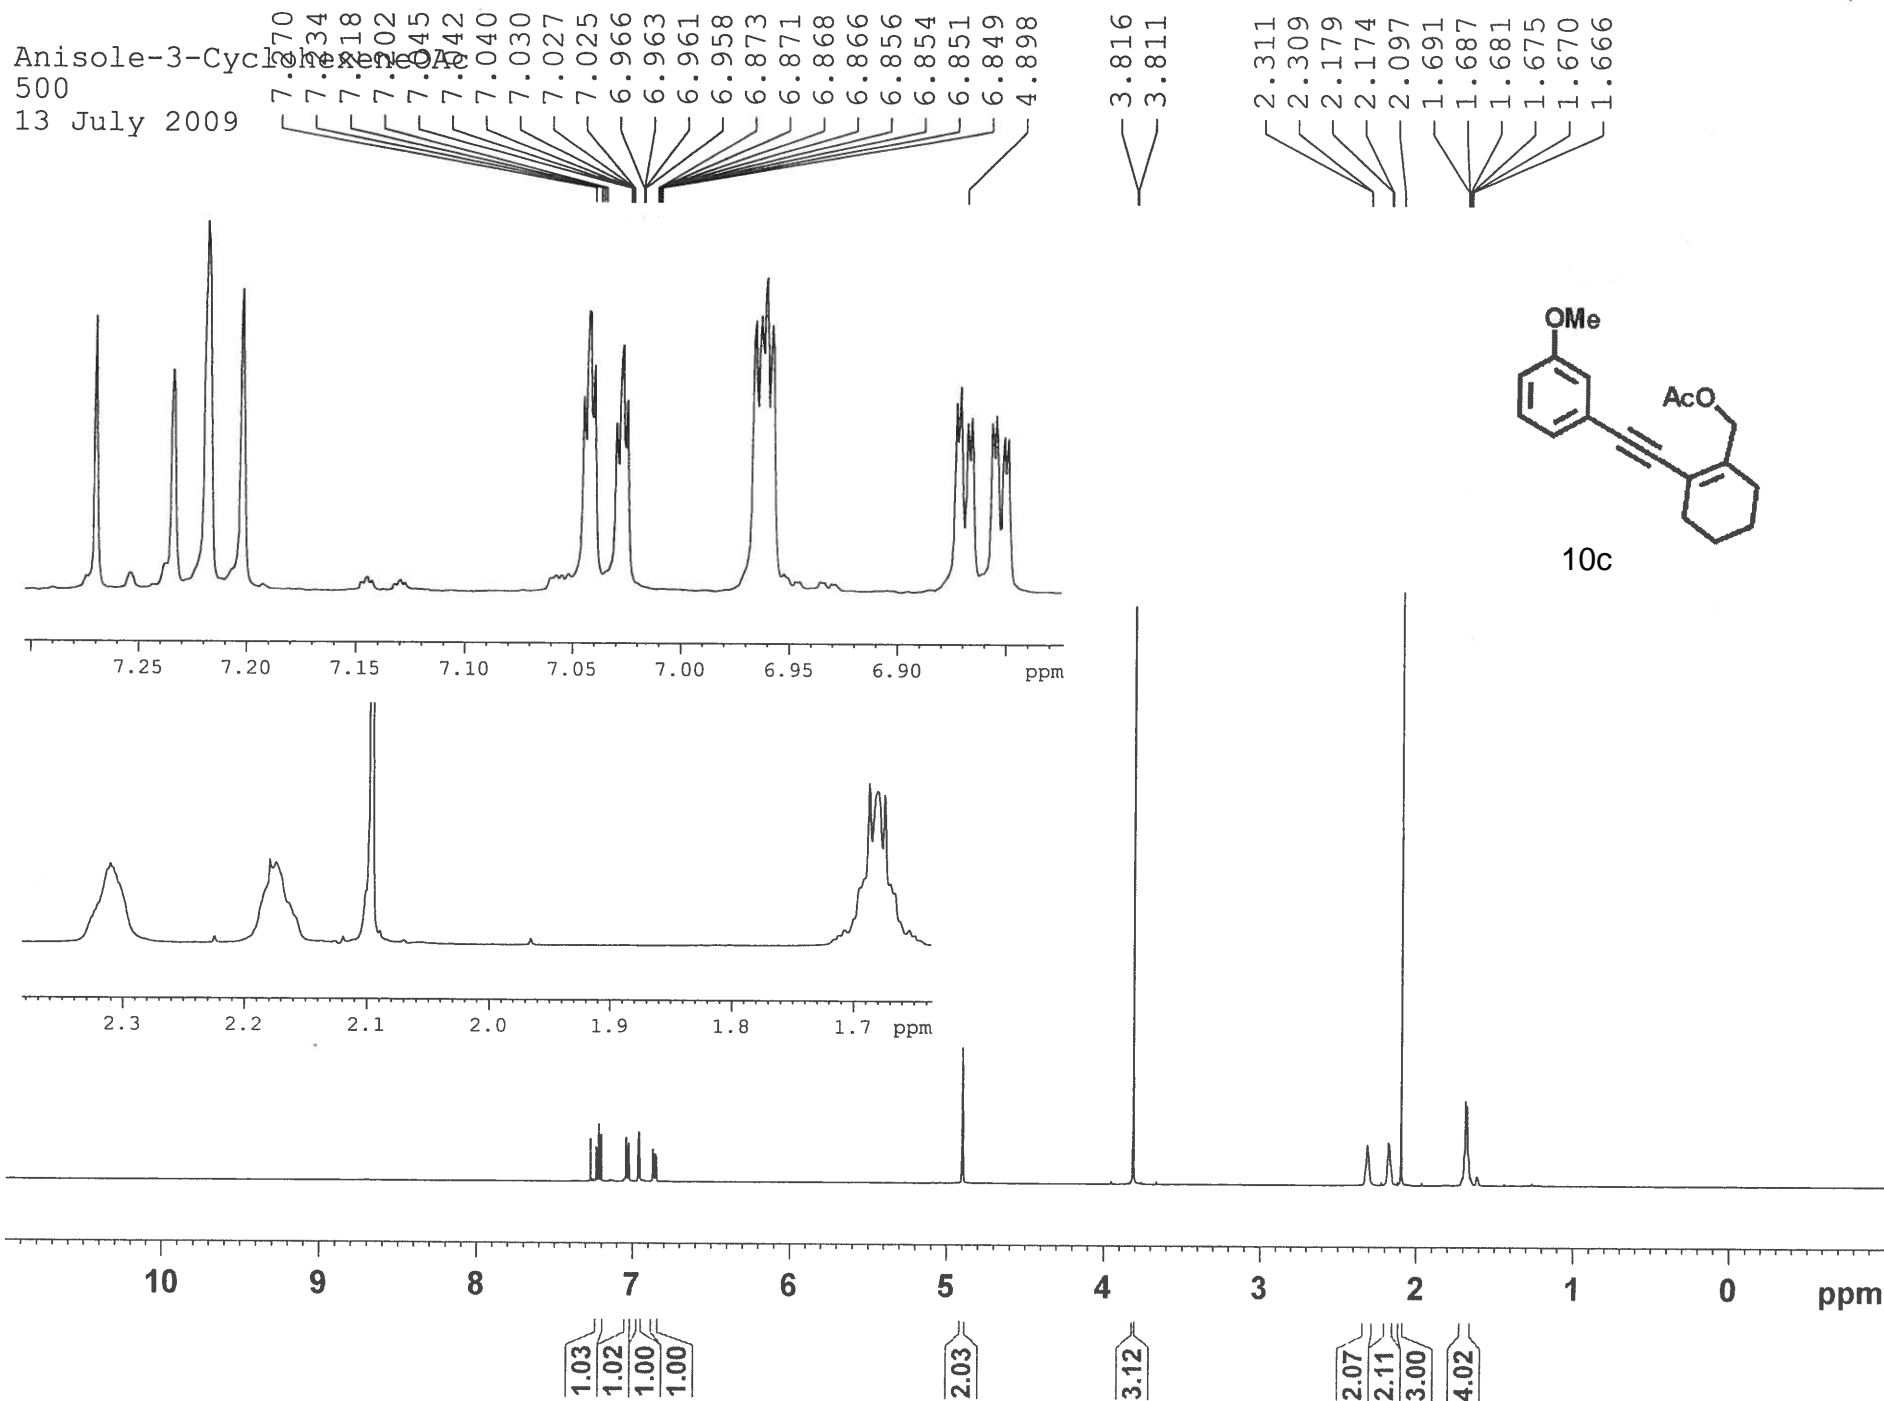

Anisole-3-CyclohexeneOAc 13C  
 300 Ultra  
 14 July 2009

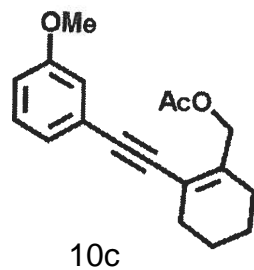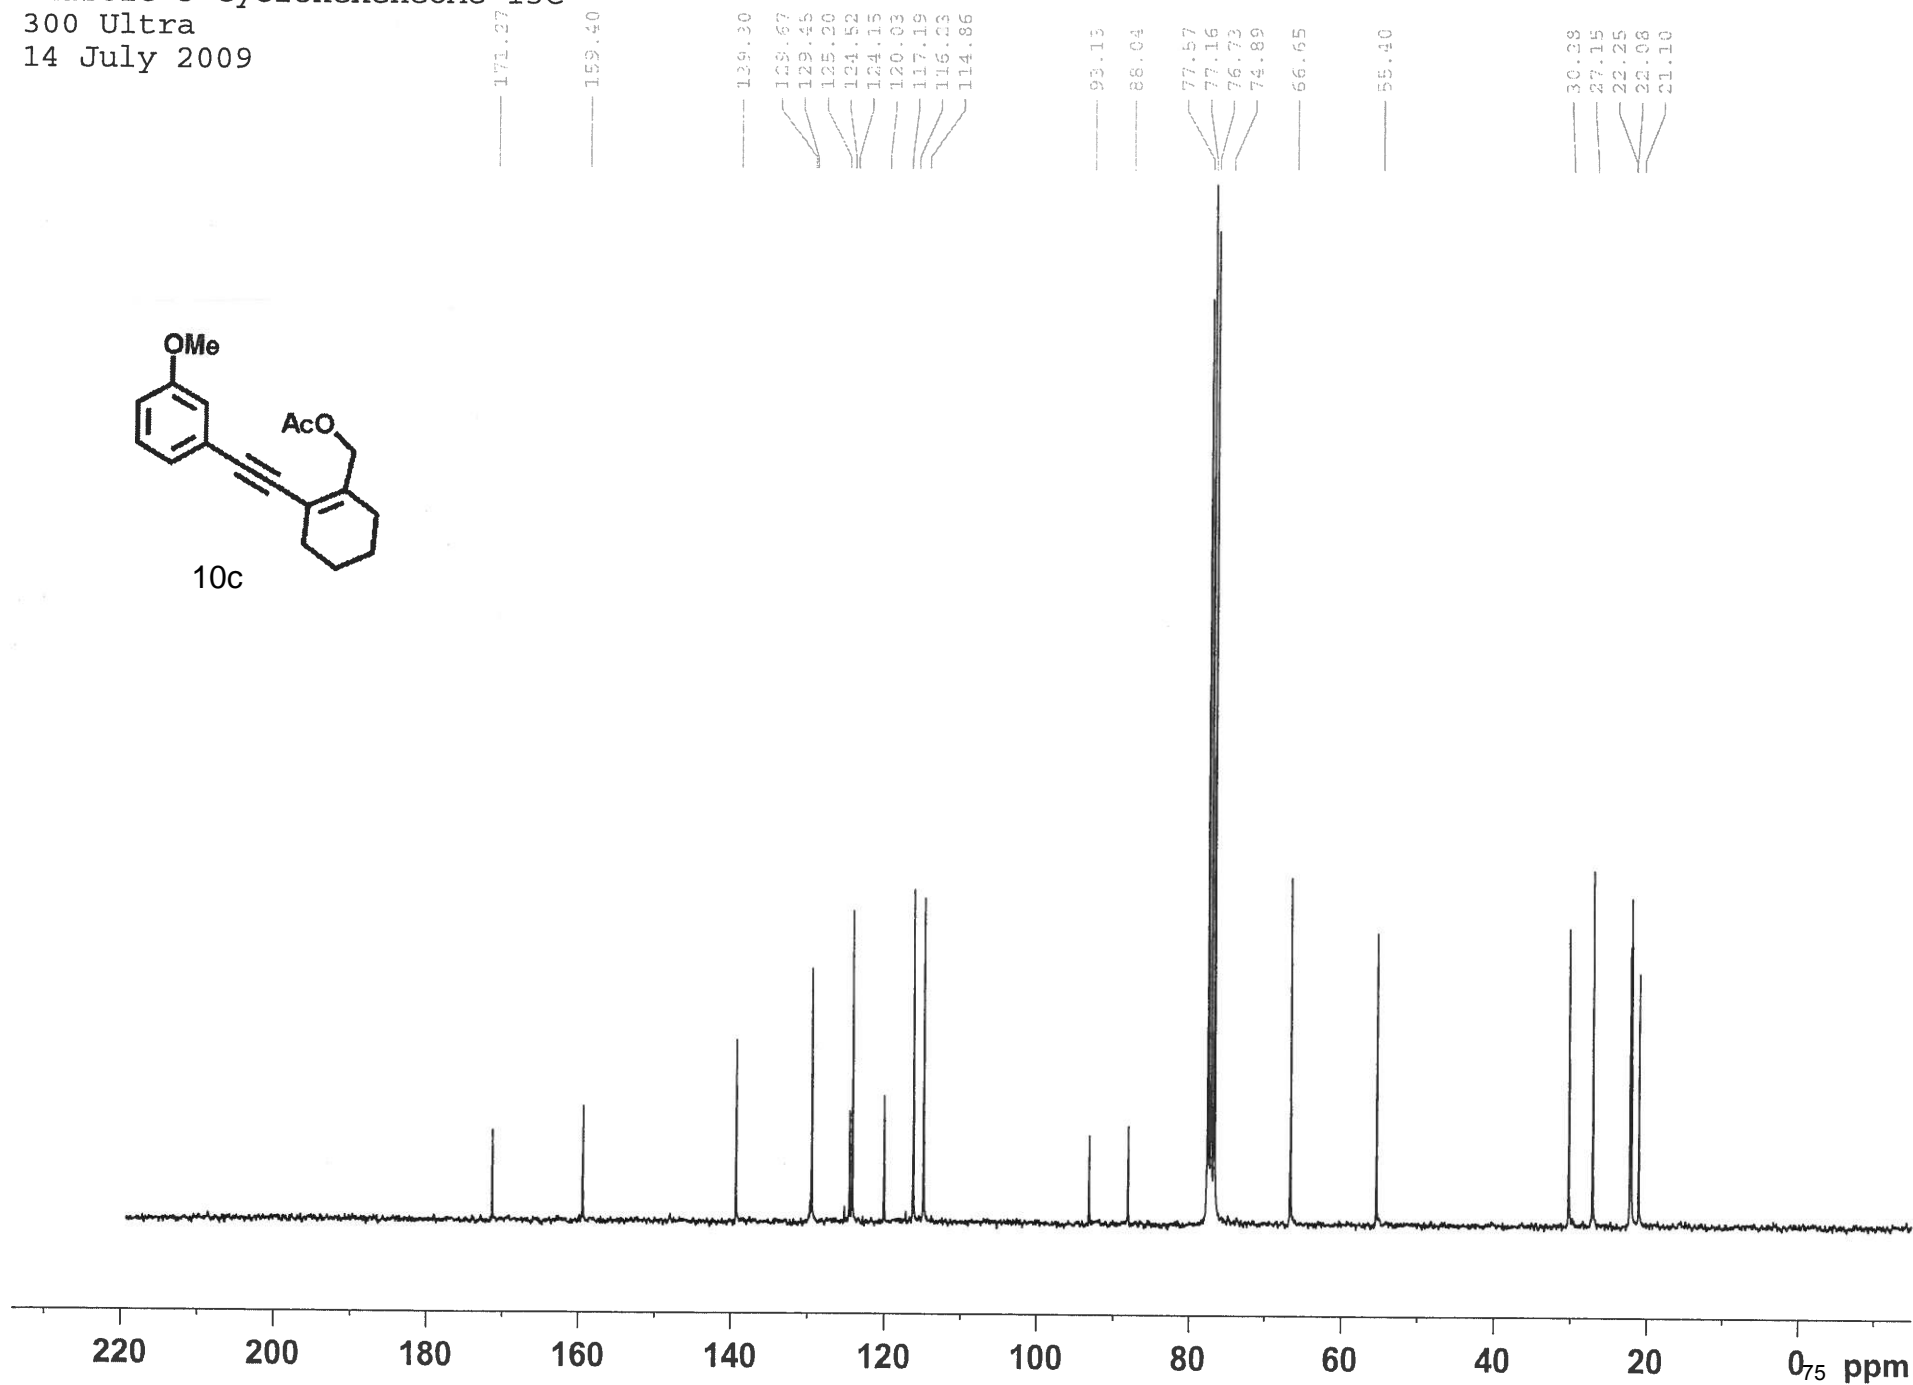

Dimethoxy-1,2-Cyclohexeneacetate  
 Topsin 500 Experiment 2  
 Tuesday 16 November 2010

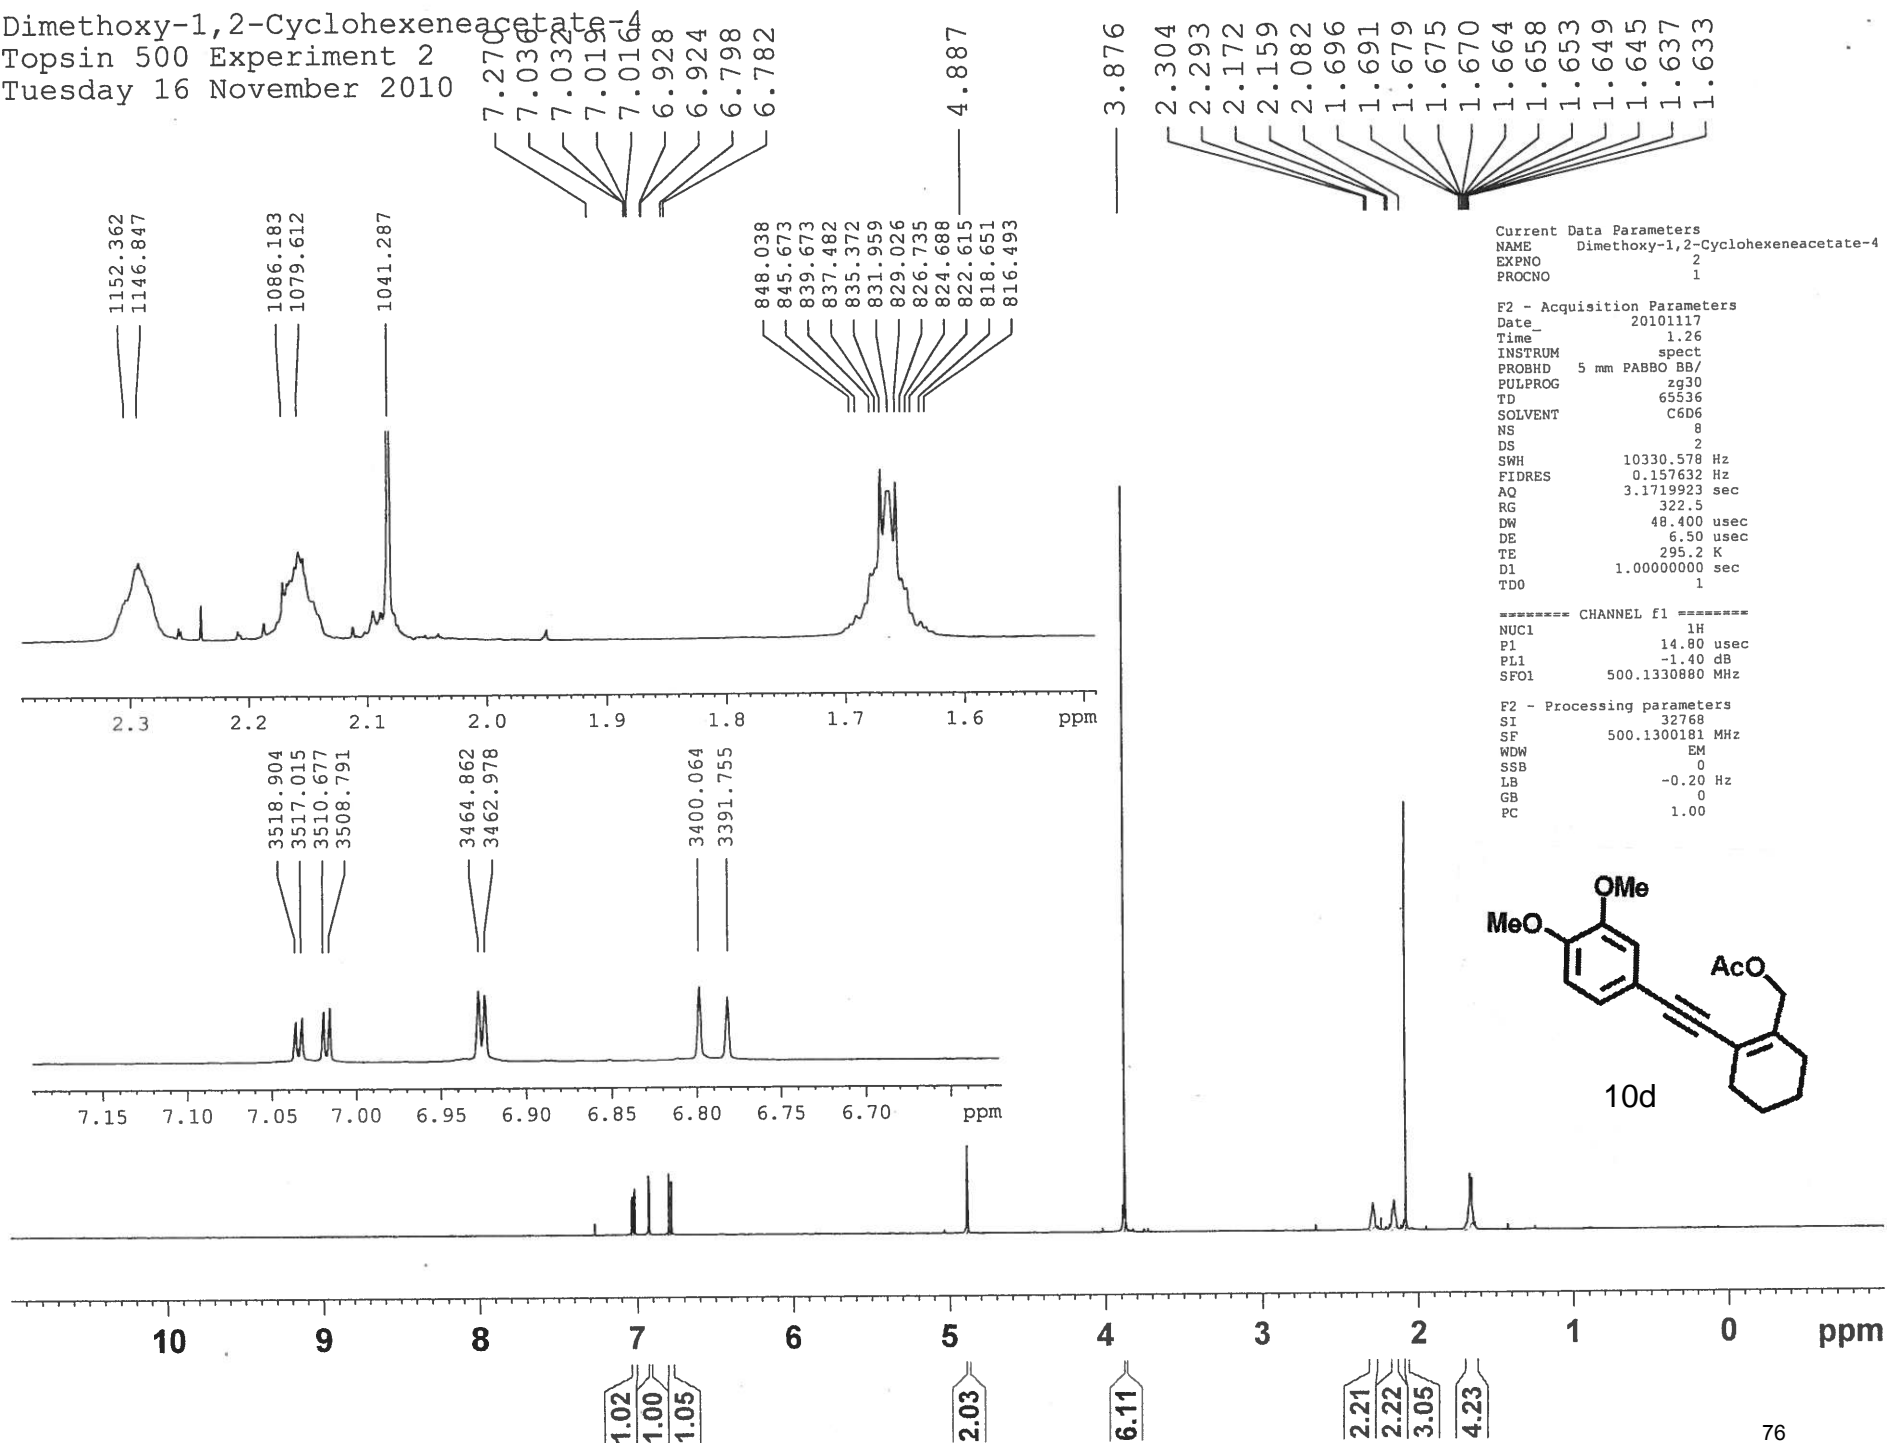

Current Data Parameters  
 NAME Dimethoxy-1,2-Cyclohexeneacetate-4  
 EXPNO 2  
 PROCNO 1

F2 - Acquisition Parameters  
 Date\_ 20101117  
 Time 1.26  
 INSTRUM spect  
 PROBHD 5 mm PABBO BB/  
 PULPROG zg30  
 TD 65536  
 SOLVENT C6D6  
 NS 8  
 DS 2  
 SWH 10330.578 Hz  
 FIDRES 0.157632 Hz  
 AQ 3.1719923 sec  
 RG 322.5  
 DW 48.400 usec  
 DE 6.50 usec  
 TE 295.2 K  
 D1 1.00000000 sec  
 TD0 1

===== CHANNEL f1 =====  
 NUC1 1H  
 P1 14.80 usec  
 PL1 -1.40 dB  
 SFO1 500.1330880 MHz

F2 - Processing parameters  
 SI 32768  
 SF 500.1300181 MHz  
 WDW EM  
 SSB 0  
 LB -0.20 Hz  
 GB 0  
 PC 1.00



Dimethoxy-1,2-Cyclohexeneacetate-4  
Experiment 4 13C  
Topspin 500  
Tuesday 16 November 2010

Current Data Parameters  
NAME Dimethoxy-1,2-Cyclohexeneacetate-4  
XPROB 4  
PROCNO 1

2 - Acquisition Parameters  
Date 20101117 K  
Time 3.19  
NSTRUM spect  
ROBHD 5 mm PABBO BB/  
ULPROG zgpg30  
D 16384  
OLVENT CDCl3  
IS 107  
IS 4  
MH 30030.029 Hz  
TDRES 1.832888 Hz  
AQ 0.2728603 sec  
RG 1625.5  
RW 16.650 usec  
RE 6.50 usec  
SE 297.2 K  
F1 1.00000000 sec  
F11 0.03000000 sec  
ELTA 0.89999998 sec  
DO 1

===== CHANNEL f1 =====  
NUC1 13C  
P1 9.50 usec  
PL1 -0.70 dB  
FO1 125.7702890 MHz

===== CHANNEL f2 =====  
PDPRG2 waltz16  
NUC2 1H  
PCPD2 70.00 usec  
PL2 -1.20 dB  
PL12 12.30 dB  
PL13 15.30 dB  
FO2 500.1325010 MHz

2 - Processing parameters  
I 32768  
F 125.7577890 MHz  
WDW EM  
SS 0  
SB 0  
B 2.00 Hz  
C 1.40

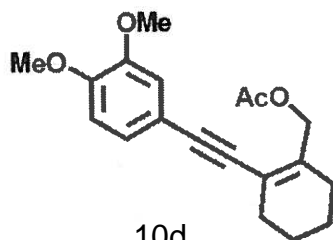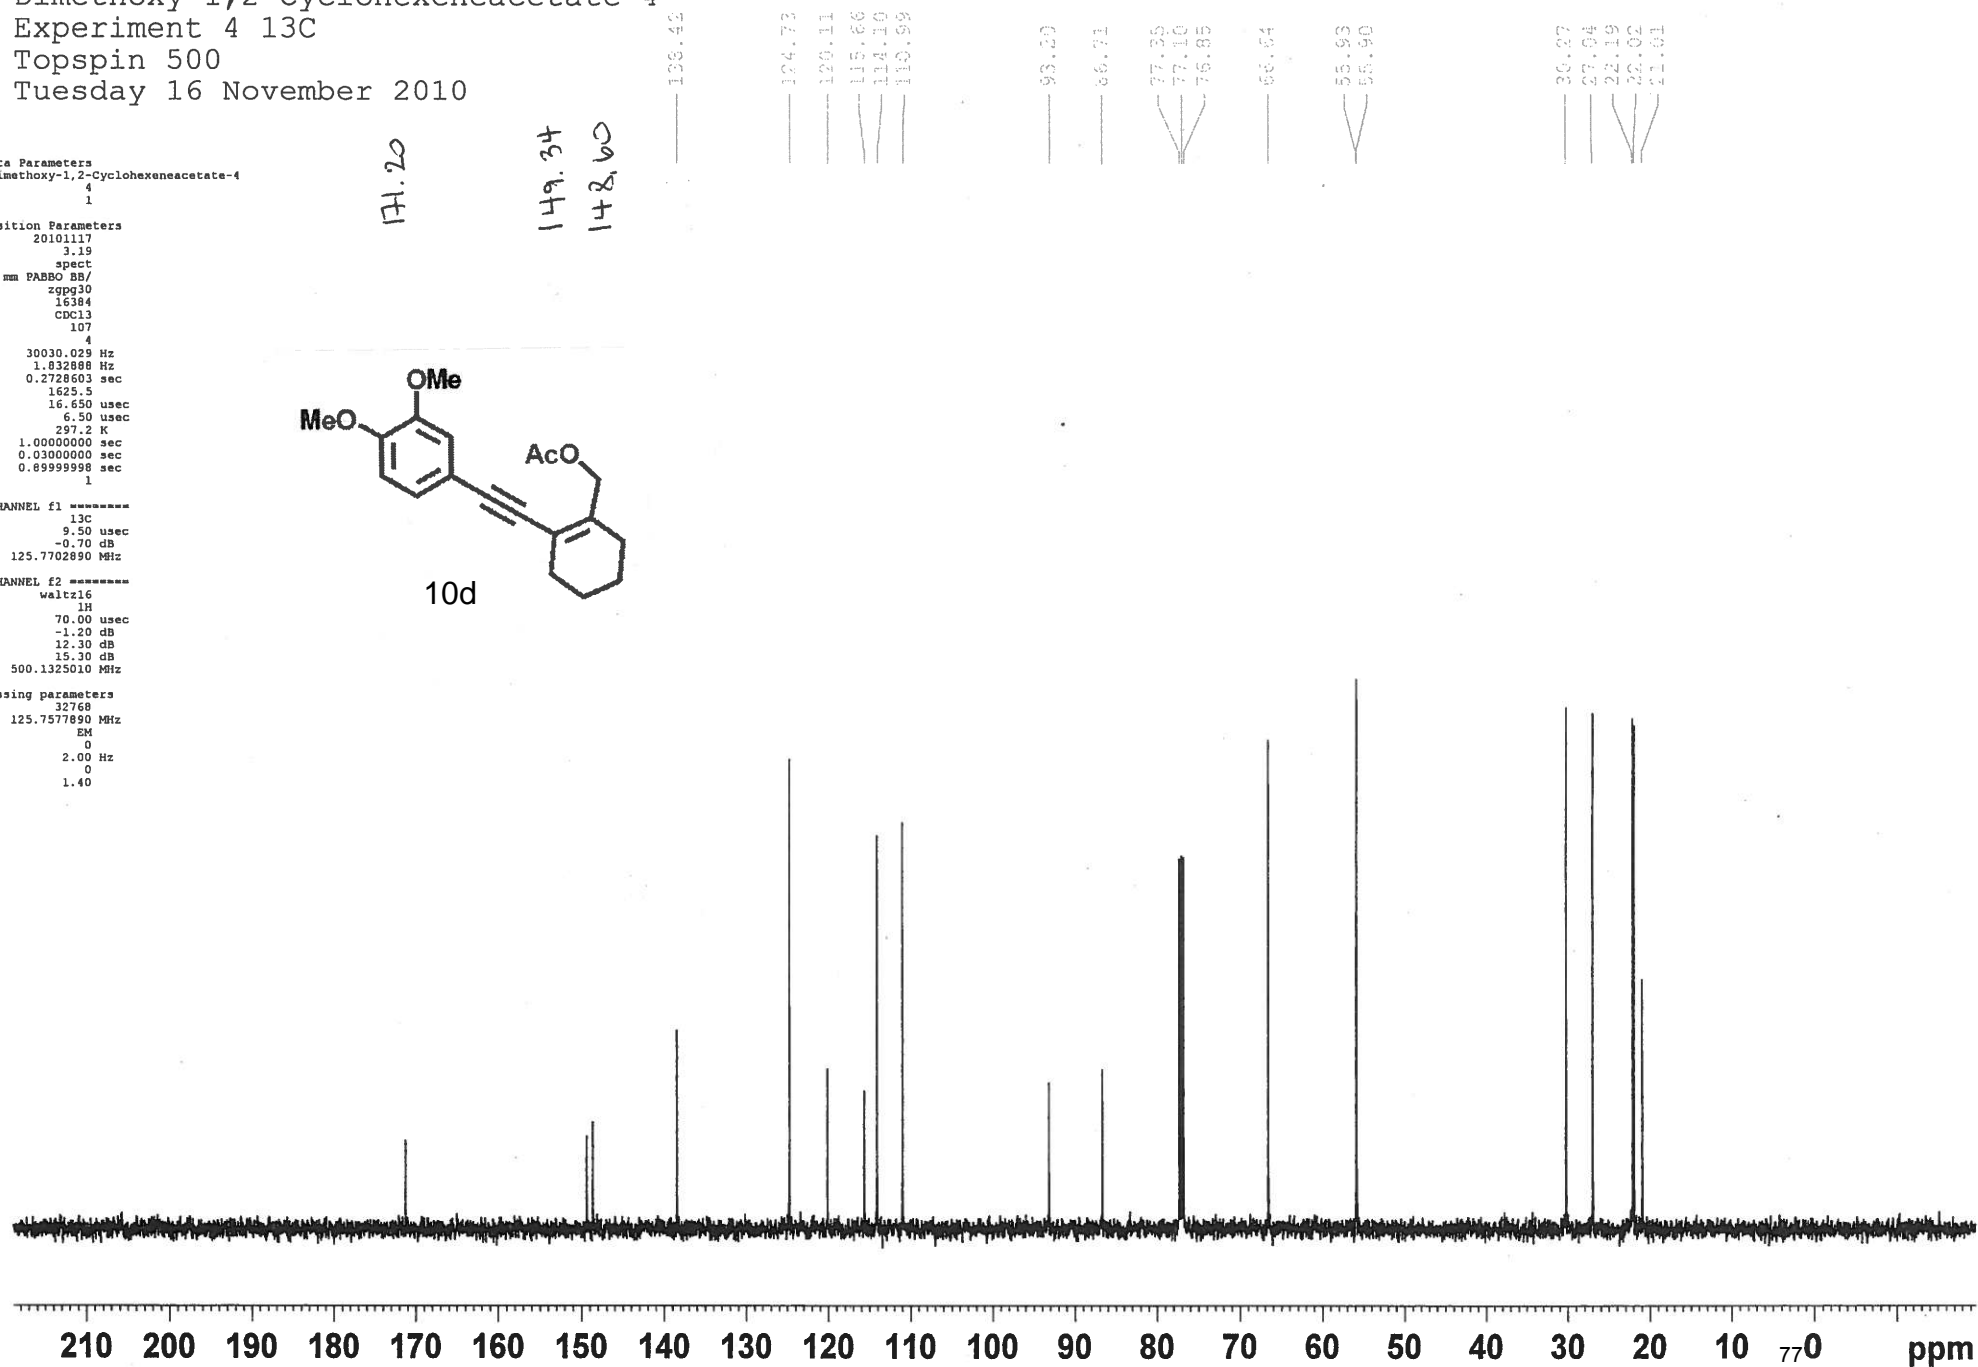

Dimethoxy-1,3-CyclopenteneOAc-5  
 Experiment 1 300  
 Wednesday 23 November 2011

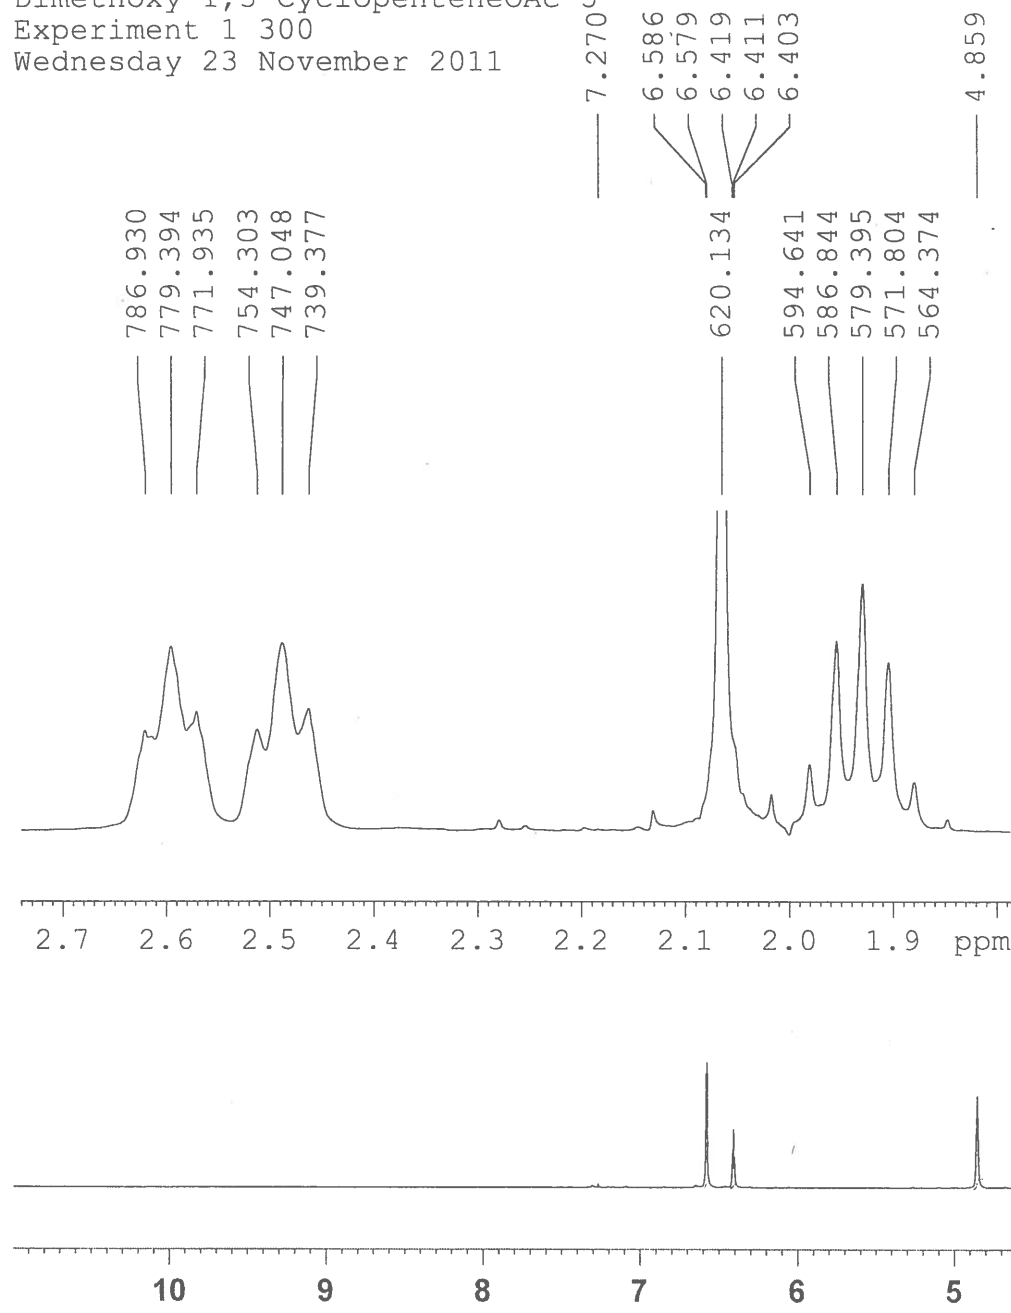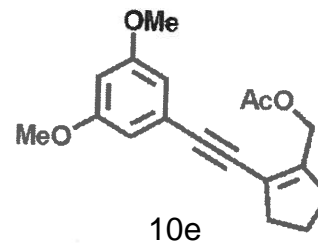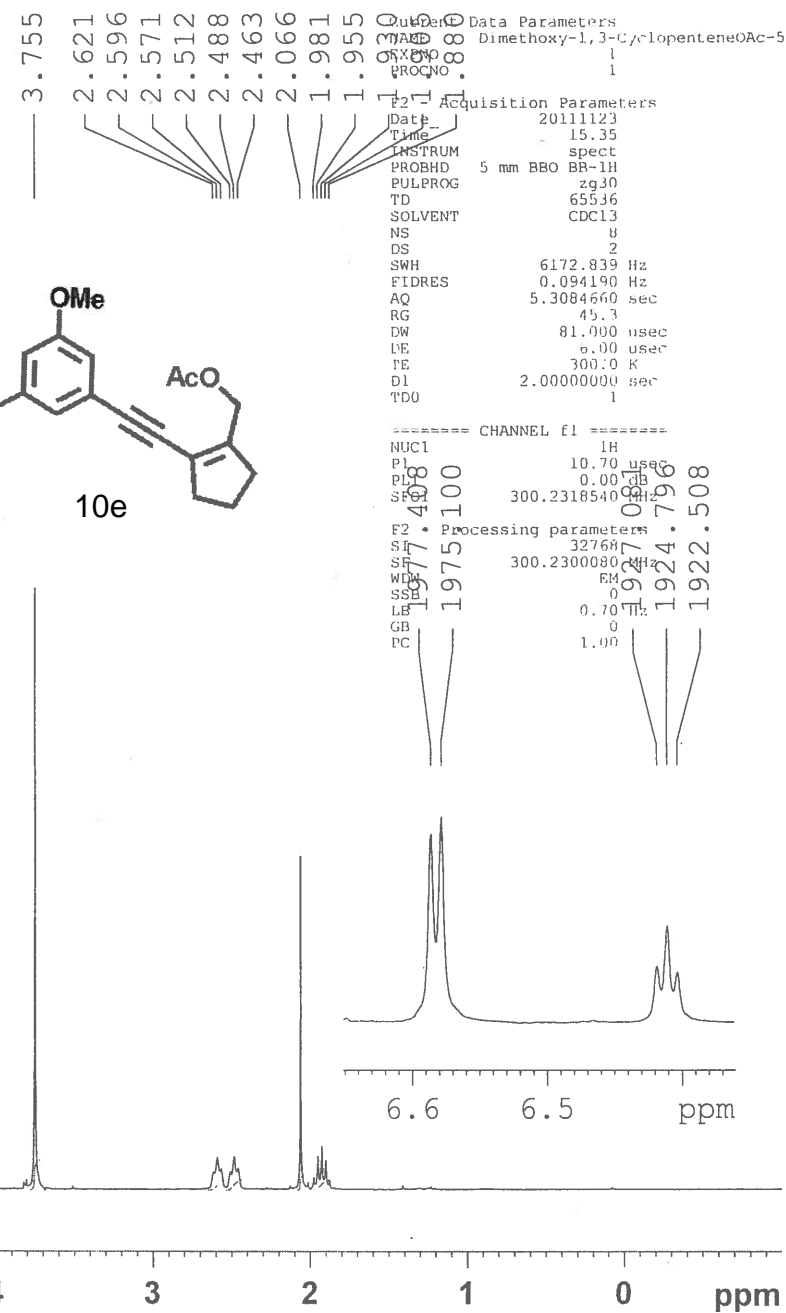

===== CHANNEL f1 =====  
 NUC1 1H  
 P1 10.70 usec  
 PL 0.00 dB  
 SP 300.2318540 MHz  
 F2 1975.100 MHz  
 SS 32768  
 WD 300.2300080 MHz  
 LB 0.70 Hz  
 GB 0.00 Hz  
 PC 1.00

===== Processing parameters =====  
 F2 1975.100 MHz  
 SS 32768  
 WD 300.2300080 MHz  
 LB 0.70 Hz  
 GB 0.00 Hz  
 PC 1.00

===== Acquisition Parameters =====  
 Date\_ 20111123  
 Time\_ 15.35  
 INSTRUM spect  
 PROBHD 5 mm BBO BB-1H  
 PULPROG zg30  
 TD 65536  
 SOLVENT CDCl3  
 NS 2  
 DS 2  
 SWH 6172.839 Hz  
 FIDRES 0.094190 Hz  
 AQ 5.3084660 sec  
 RG 45.3  
 DW 81.000 usec  
 DE 0.00 usec  
 RE 300.0 K  
 D1 2.00000000 sec  
 TDO 1

===== Data Parameters =====  
 Date\_ 20111123  
 Time\_ 15.35  
 INSTRUM spect  
 PROBHD 5 mm BBO BB-1H  
 PULPROG zg30  
 TD 65536  
 SOLVENT CDCl3  
 NS 2  
 DS 2  
 SWH 6172.839 Hz  
 FIDRES 0.094190 Hz  
 AQ 5.3084660 sec  
 RG 45.3  
 DW 81.000 usec  
 DE 0.00 usec  
 RE 300.0 K  
 D1 2.00000000 sec  
 TDO 1

Dimethoxy-1,3-CyclopenteneOAc-5 <sup>13</sup>C  
 Experiment 2 300  
 Wednesday 23 November 2011

Current Data Parameters  
 NAME Dimethoxy-1,3-CyclopenteneOAc-5 <sup>13</sup>C  
 EXPNO 2  
 PROCNO 1

F2 - Acquisition Parameters  
 Date\_ 20111123  
 Time 16.03  
 INSTRUM spect  
 PROBHD 5 mm BBO BB-1H  
 PULPROG zgpg30  
 TD 16384  
 SOLVENT CDCl<sub>3</sub>  
 NS 67  
 DS 4  
 SWH 17985.611 Hz  
 FIDRES 1.097755 Hz  
 AQ 0.4555252 sec  
 RG 3649.1  
 DW 27.800 usec  
 DE 6.00 usec  
 TE 300.0 K  
 D1 1.00000000 sec  
 d11 0.03000000 sec  
 DELTA 0.89999998 sec  
 TEO 1

===== CHANNEL f1 =====  
 NUC1 <sup>13</sup>C  
 P1 15.90 usec  
 PL1 0.00 dB  
 SFO1 75.5004428 MHz

===== CHANNEL f2 =====  
 CPDPRG2 waltz16  
 NUC2 <sup>1</sup>H  
 PCPD2 70.00 usec  
 PL2 0.00 dB  
 PL12 16.31 dB  
 PL13 19.31 dB  
 SFO2 300.2323000 MHz

F2 - Processing parameters  
 SI 16384  
 SF 75.4928917 MHz  
 WDW EM  
 SSB 0  
 LB 2.00 Hz  
 GB 0  
 PC 1.40

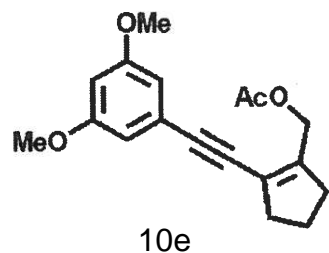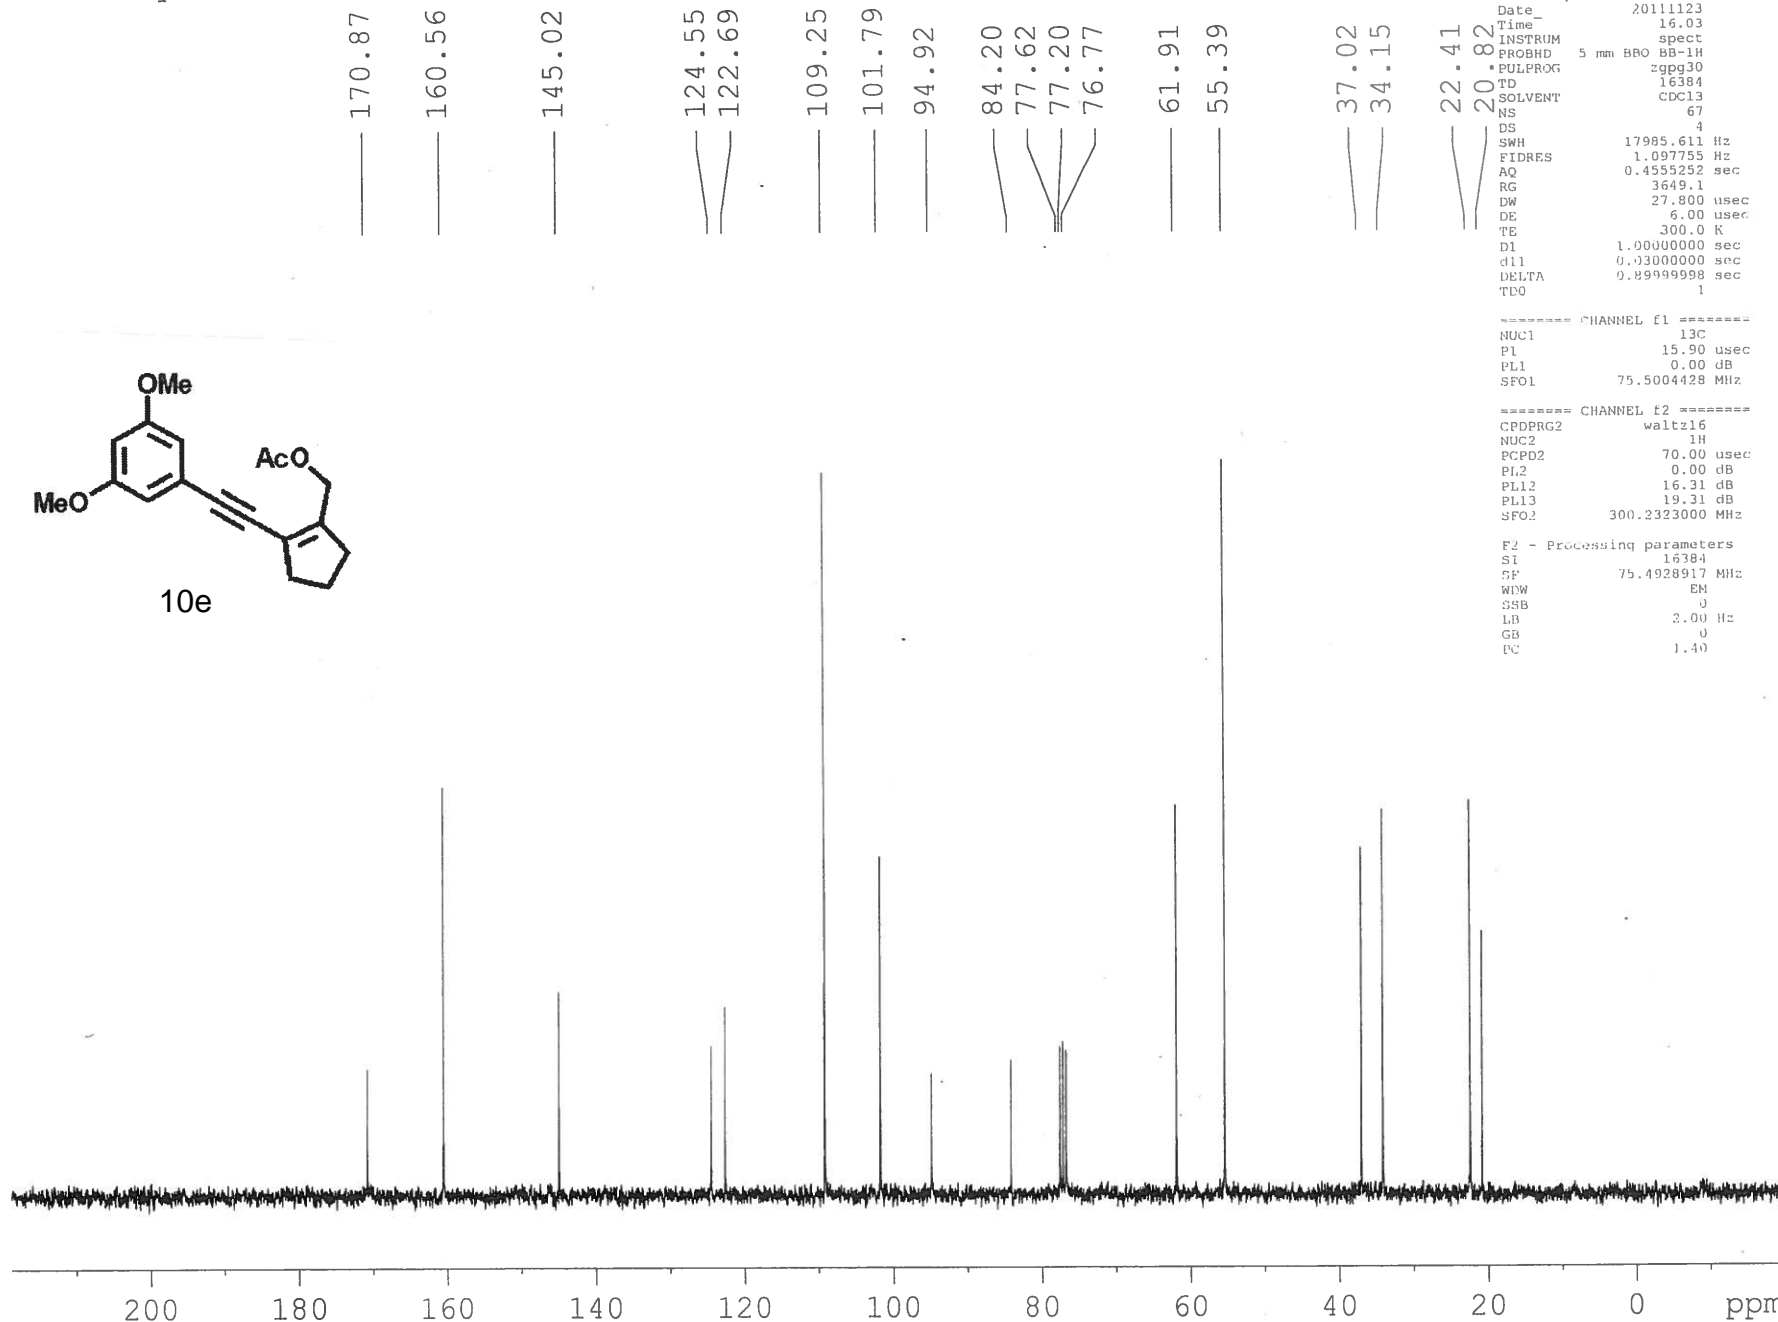

3293.785  
3291.496

Dimethoxy-1,3-CC-CyclohexeneCH2OAc-  
Experiment 1 Topspin 500  
Thursday 28 April 2011

3213.001  
3210.728  
3208.335

7.271

6.586  
6.581  
6.424  
6.420  
6.415

4.885

3.776

2.299  
2.297  
2.295  
2.163  
2.086  
1.699  
1.694  
1.682  
1.674  
1.667  
1.661  
1.657  
1.653  
1.641

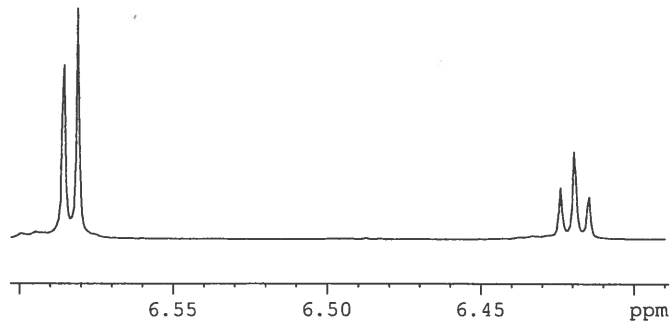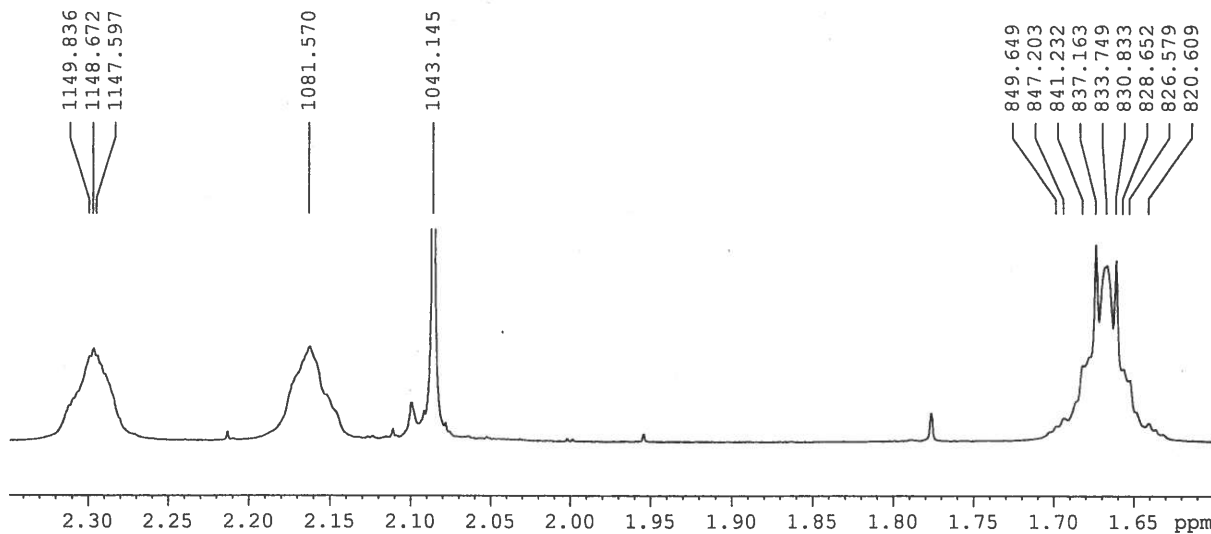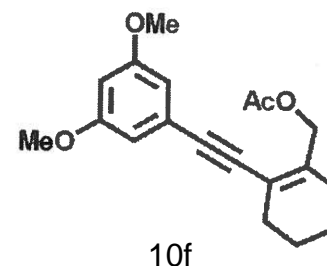

===== CHANNEL f1 =====  
F2 - Acquisition parameters  
Date\_ 20110428  
Time\_ 14.13  
INSTRUM\_ spect  
PROBHD\_ 5 mm FALBO 500  
PULPROG\_ zgpg30  
TD\_ 65536  
SOLVENT\_ DMSO  
NS\_ 4  
DS\_ 4  
SWH\_ 10000.000 Hz  
FIDRES\_ 0.157662 Hz  
AQ\_ 3.1724492 sec  
RG\_ 16  
AD\_ 48.400 deg  
FL\_ 6.50 deg  
TE\_ 294.2 K  
D1\_ 1.00000000 sec  
DELTA\_ 0.00  
===== CHANNEL f2 =====  
F2 - Processing parameters  
SI\_ 32768  
SF\_ 500.1300178 MHz  
WDW\_ em  
SSB\_ 0  
LB\_ 0.00 Hz  
GB\_ 0  
PC\_ 1.00

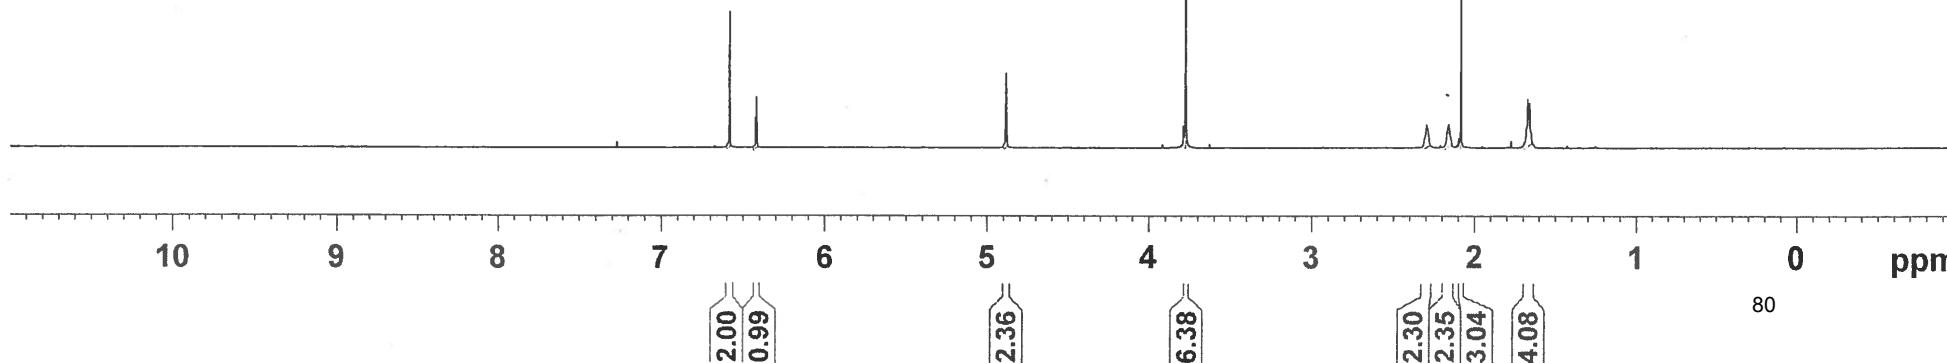

methoxy-1,3-CC-CyclohexeneOAc-5  
 spin 300 Ultra  
 iday 29 April 2011  
 periment 1

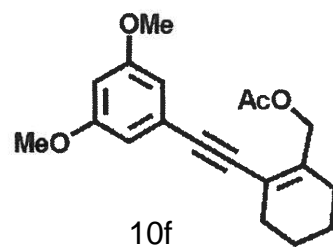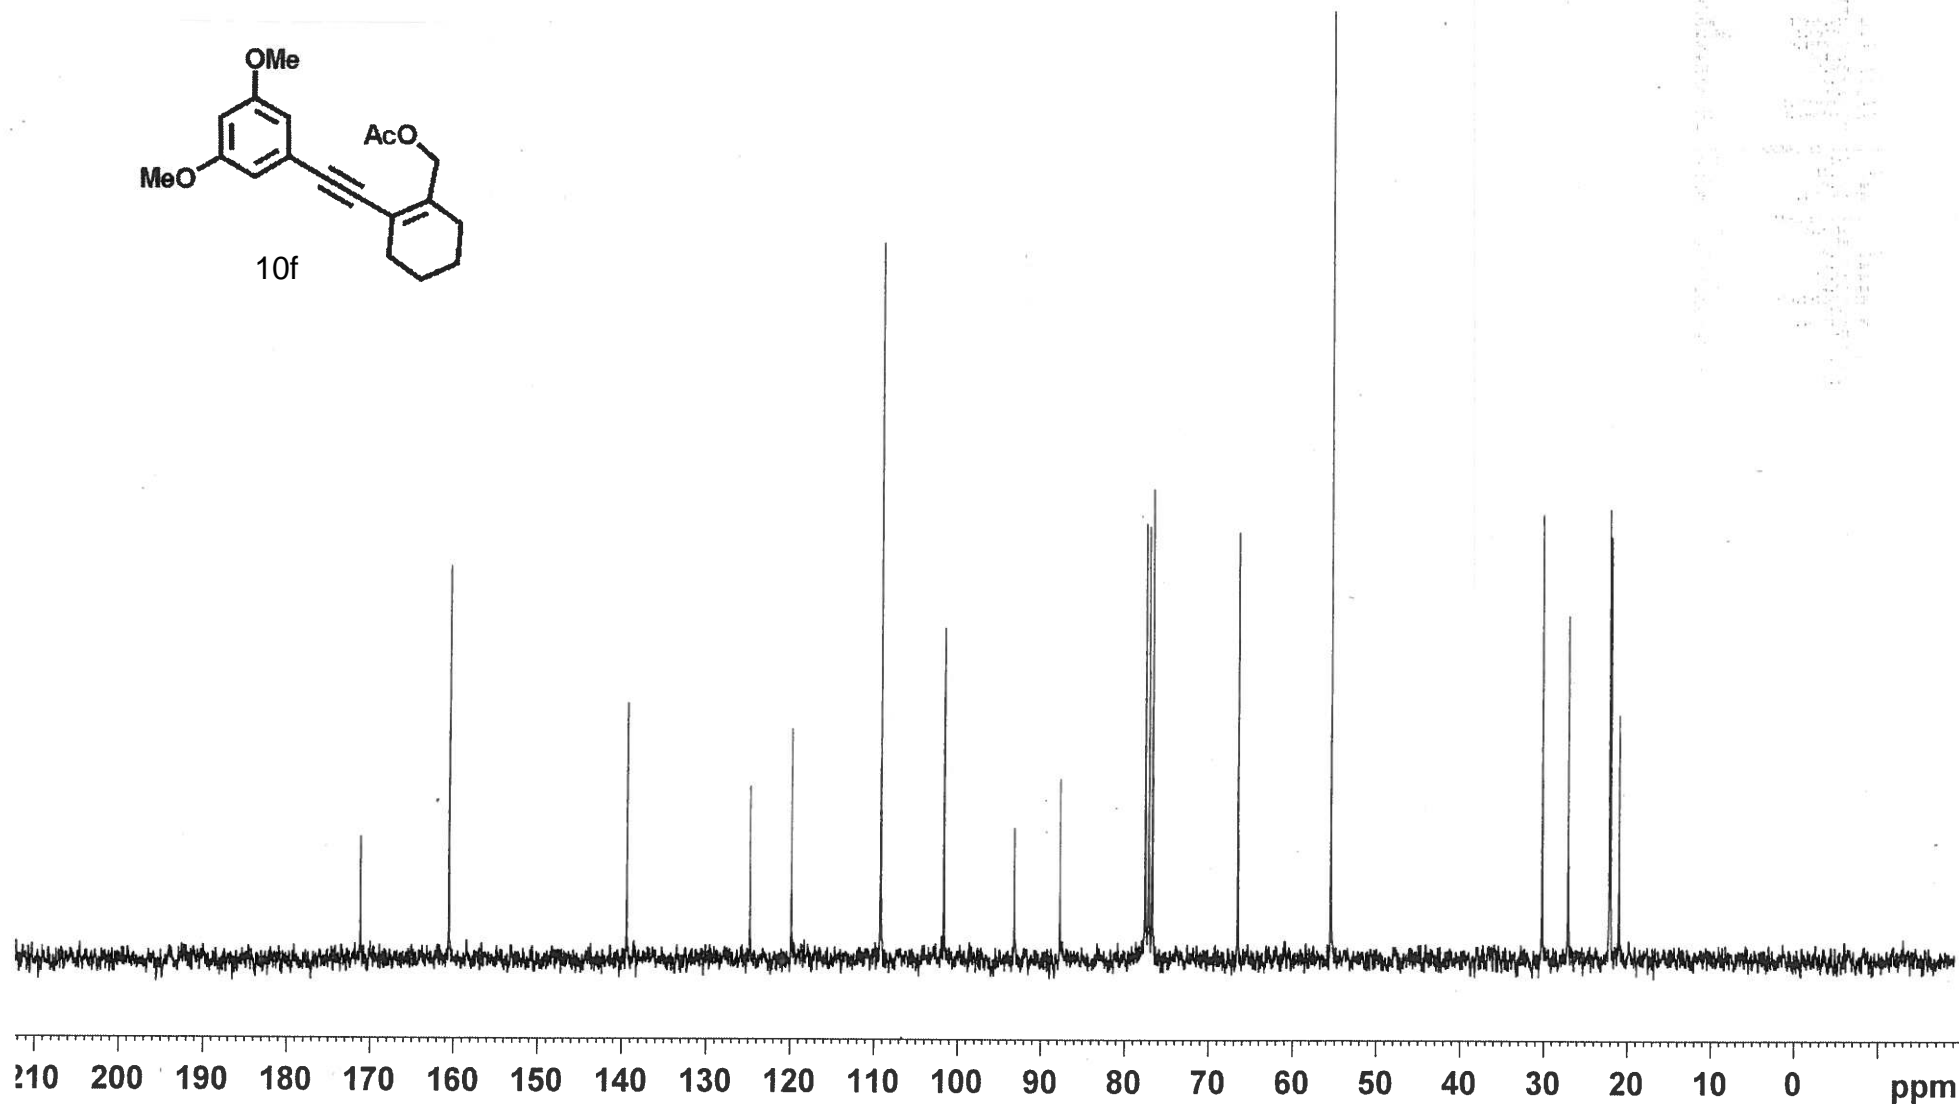

13C NMR spectrum of compound 10f. The spectrum shows several sharp peaks, indicating the presence of the compound. The peaks are labeled with their chemical shifts in ppm: 172.1, 158.1, 142.1, 125.1, 122.1, 118.1, 102.1, 95.1, 85.1, 78.1, 75.1, 65.1, 55.1, 35.1, 32.1, and 25.1.

Dimethoxy-1,4-Cyclopenteneacetate-2  
 Experiment 2  
 500 Topsin  
 Tuesday, 31 August 2010

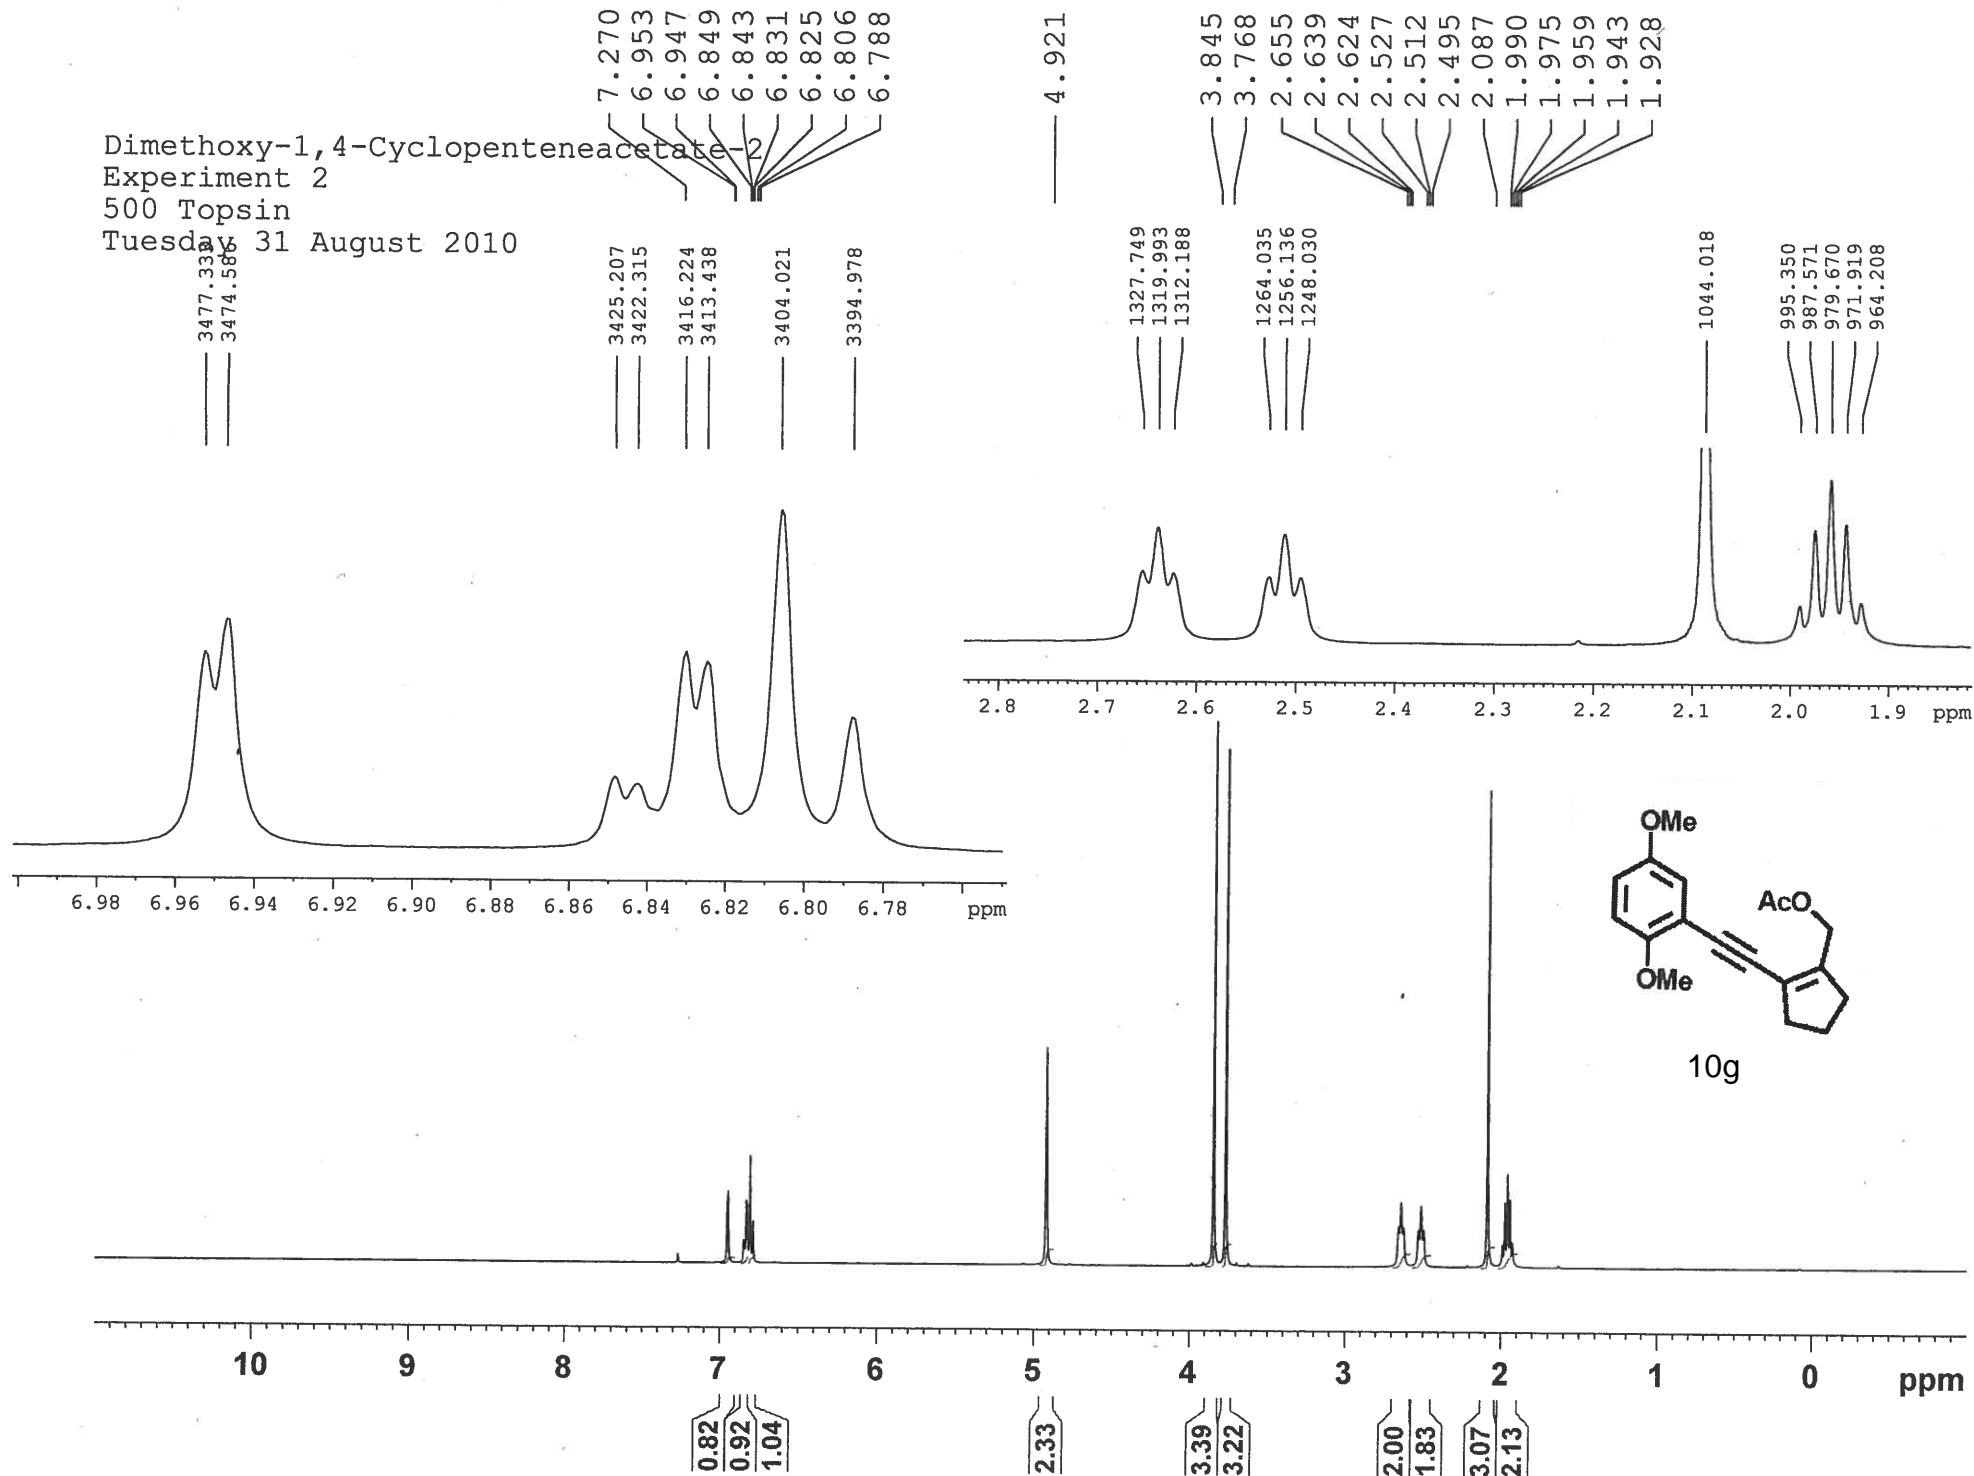

Dimethoxy-1,4-CC-Cyclopenteneacetate-2 <sup>13</sup>C

Ultra 300

Tuesday 31 August 2010

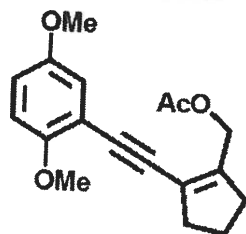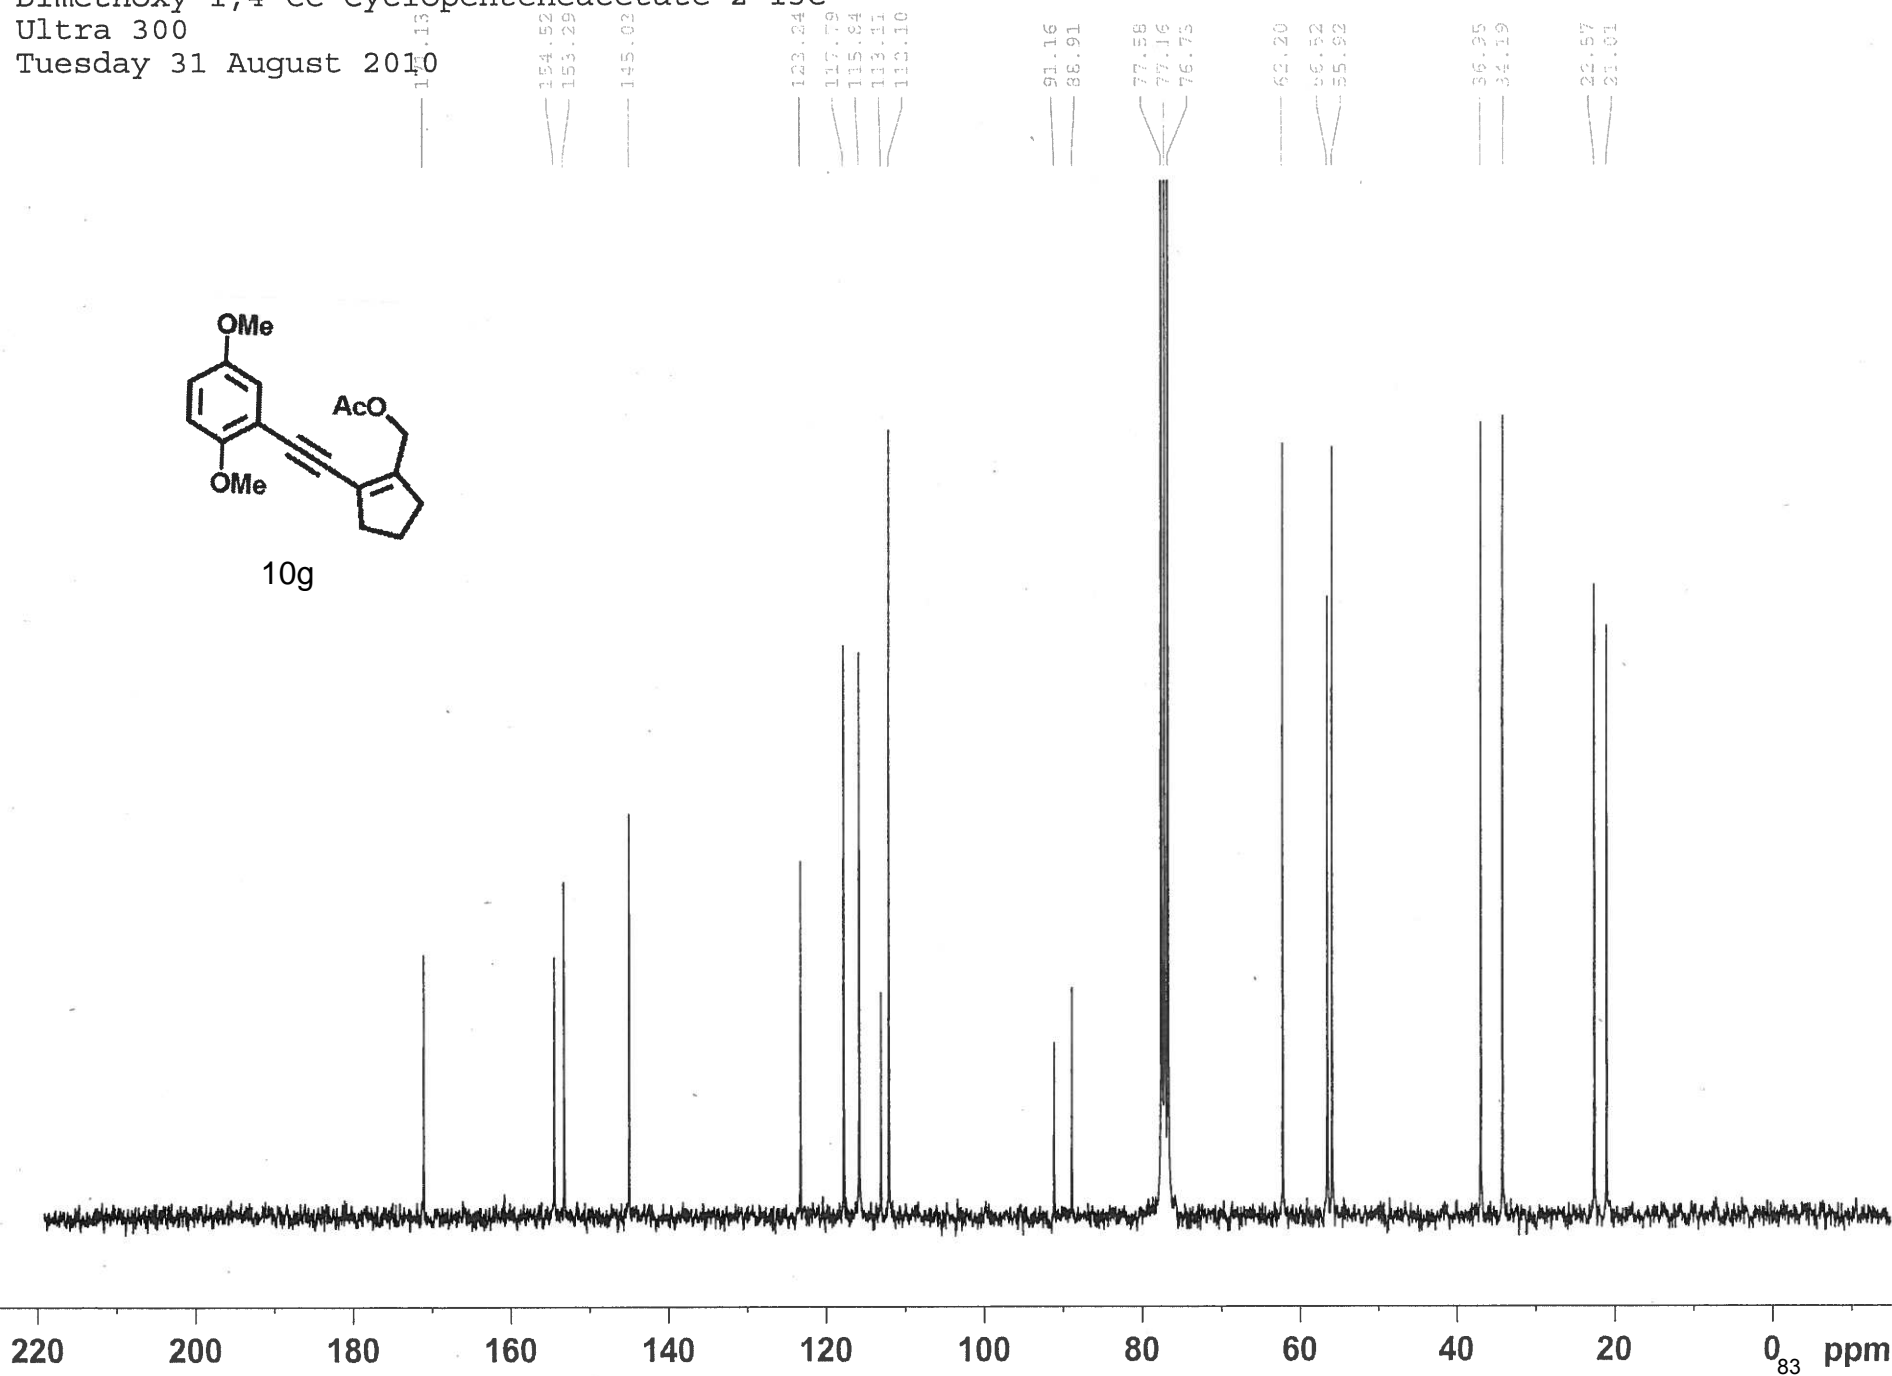

Dimethoxy-1,4-Cyclohexeneacetate-2

Experiment 2

Topspin 500

Tuesday 16 November 2010

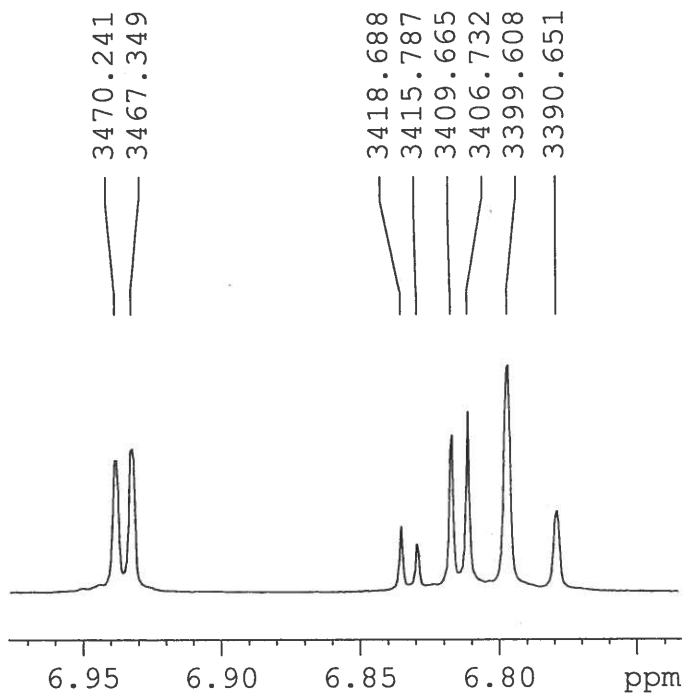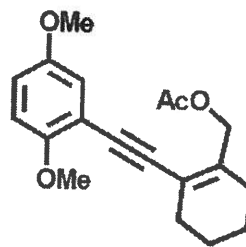

10h

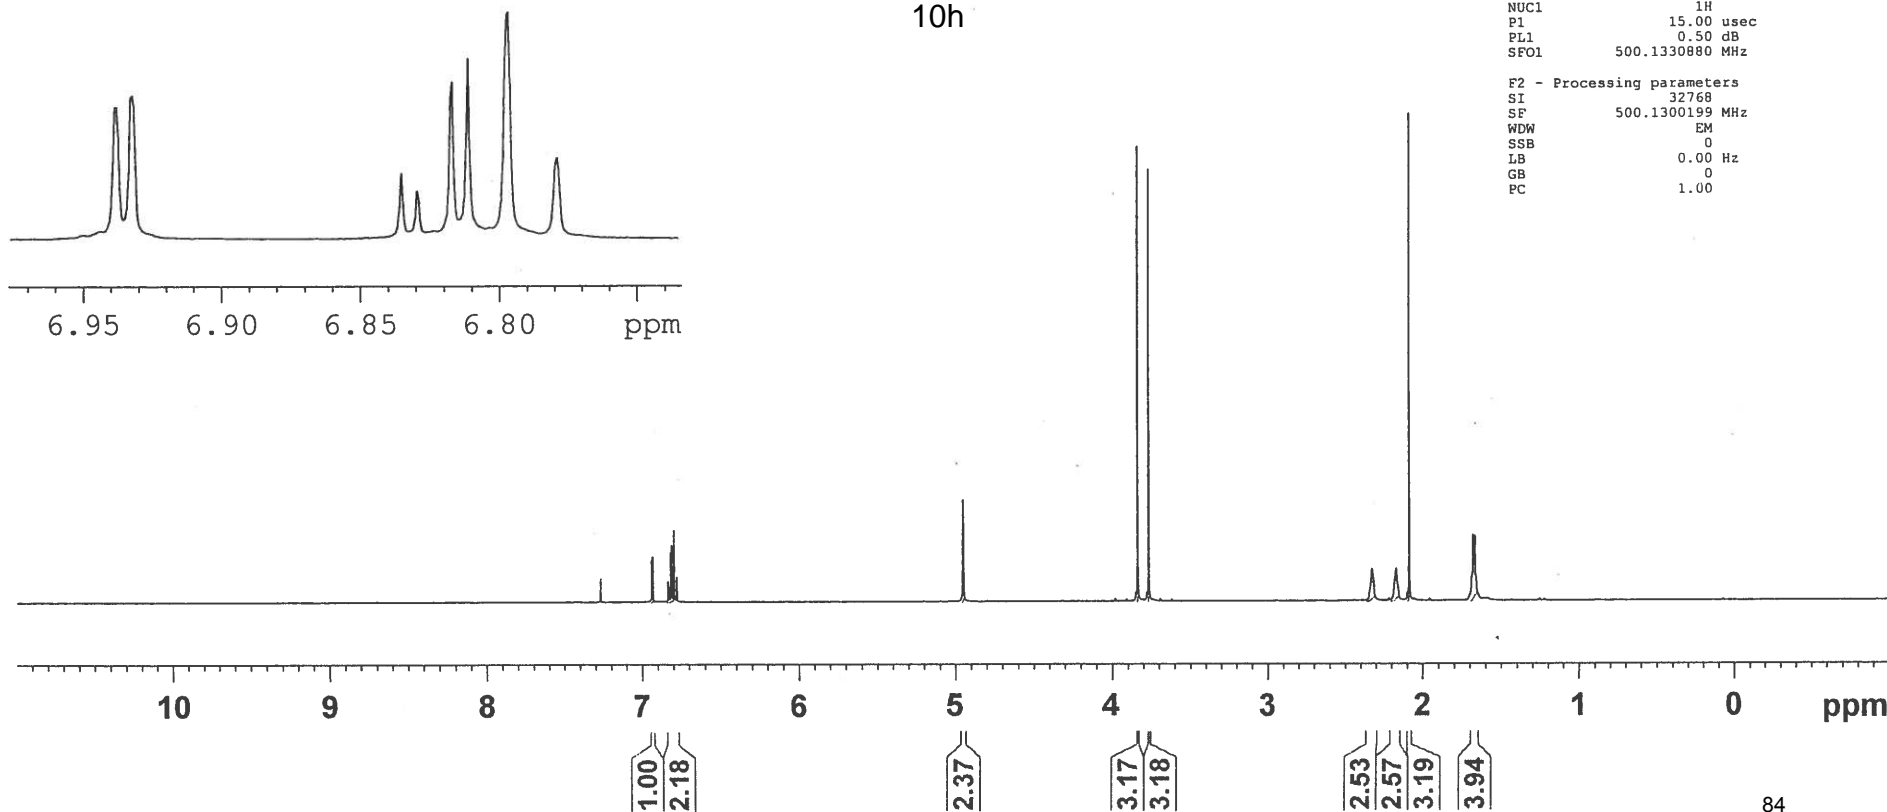

Current Data Parameters  
NAME Dimethoxy-1,4-Cyclohexeneacetate-2  
EXPNO 2  
PROCNO 1

F2 - Acquisition Parameters  
Date 20101116  
Time 23.54  
INSTRUM spect  
PROBHD 5 mm PABBO BB/  
PULPROG zg  
TD 65536  
SOLVENT C6D6  
NS 8  
DS 2  
SWH 10330.578 Hz  
FIDRES 0.157632 Hz  
AQ 3.1719923 sec  
RG 101.6  
DW 48.400 usec  
DE 6.50 usec  
TE 295.2 K  
D1 1.00000000 sec  
TDO 1

\*\*\*\*\* CHANNEL f1 \*\*\*\*\*  
NUC1 1H  
P1 15.00 usec  
PL1 0.50 dB  
SFO1 500.1330880 MHz

F2 - Processing parameters  
SI 32768  
SF 500.1300199 MHz  
WDW EM  
SSB 0  
LB 0.00 Hz  
GB 0  
PC 1.00



Dimethoxy-1,4-Cyclohexeneacetate-3  
 Experiment 3 13C  
 Topspin 500  
 Tuesday 16 November 2011

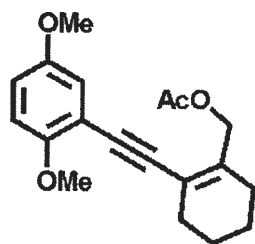

10h

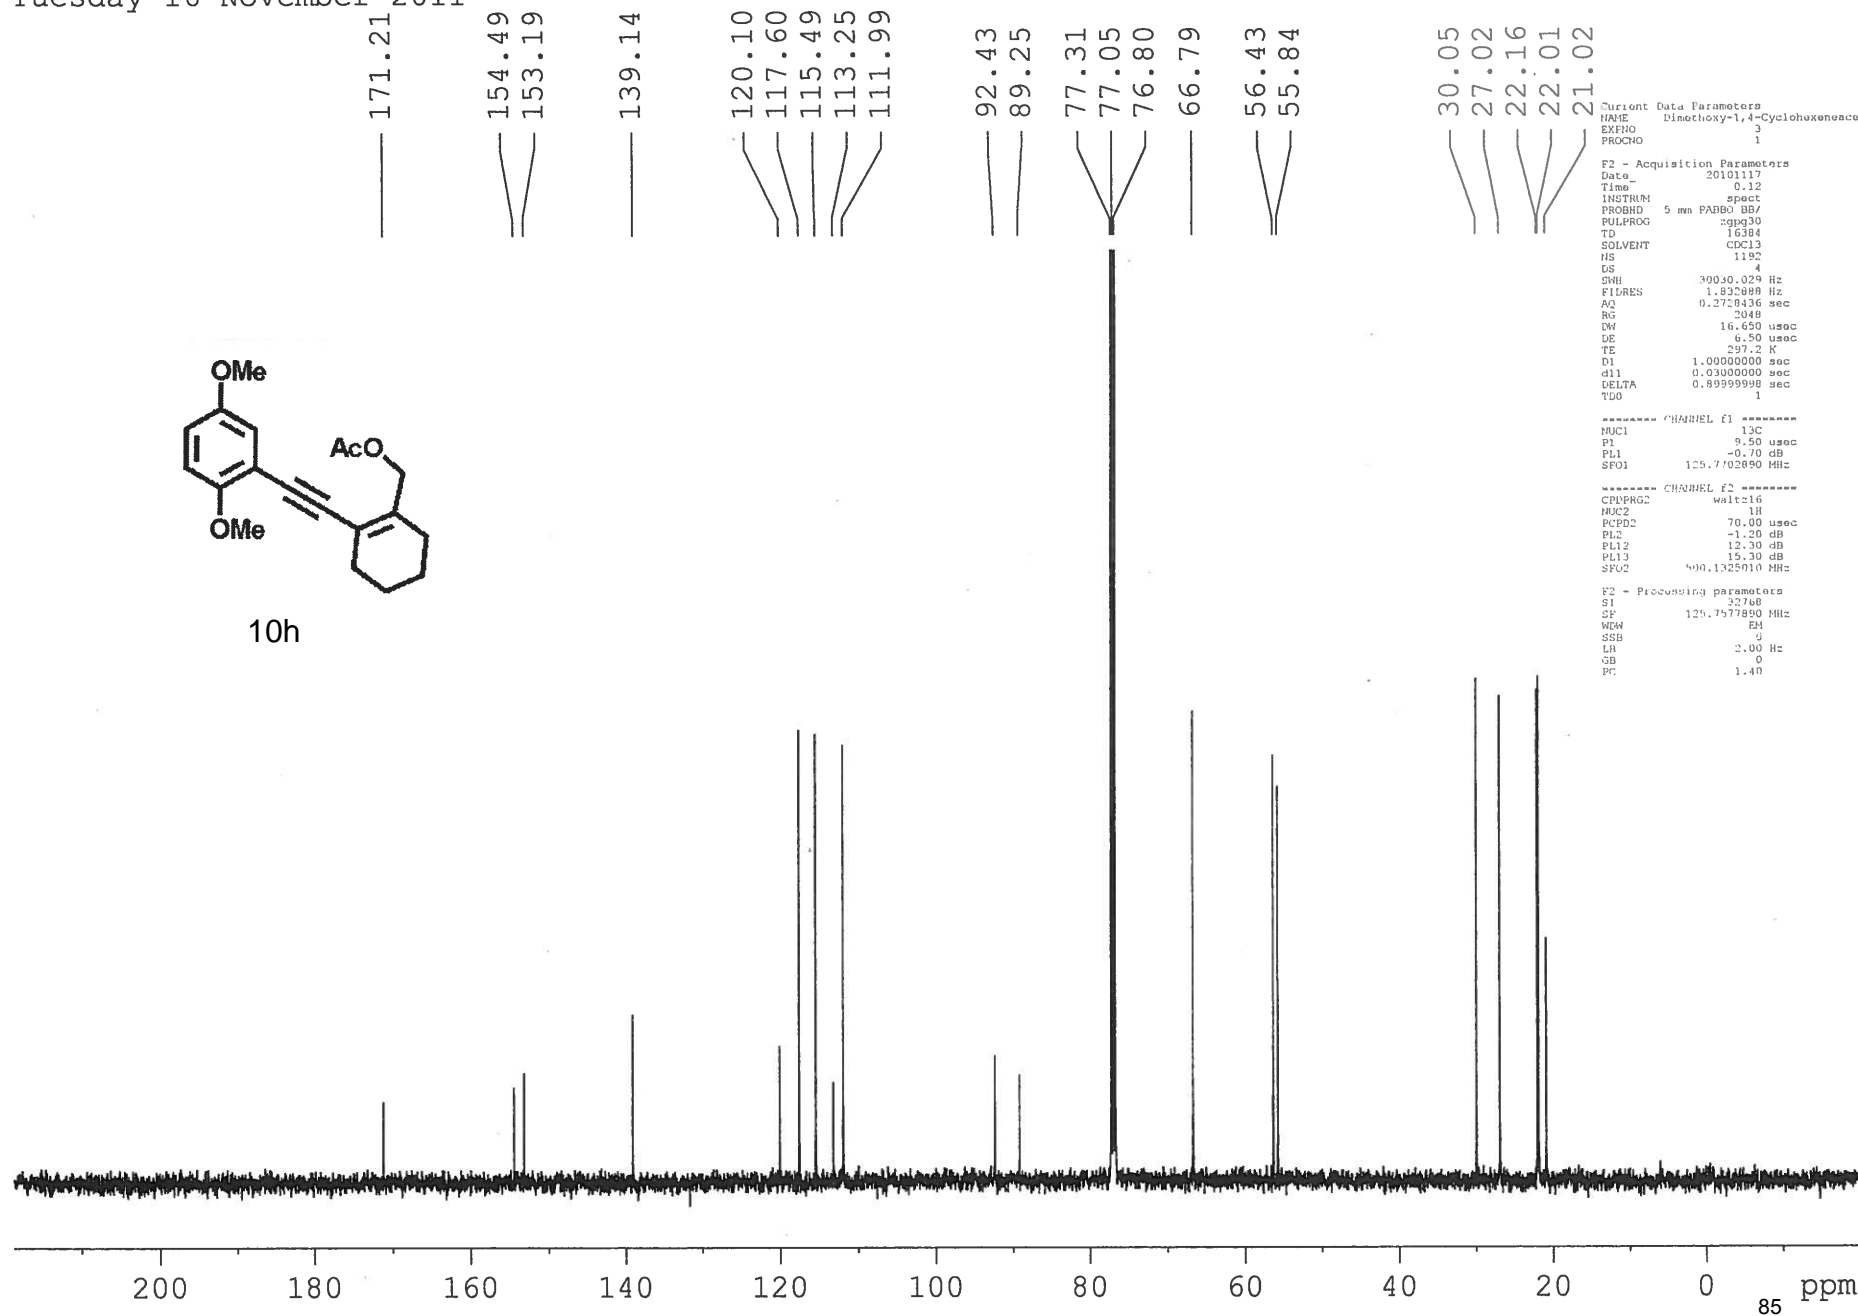

Curion Data Parameters  
 NAME Dimethoxy-1,4-Cyclohexeneacetate-2  
 EXPNO 3  
 PROCNO 1  
 F2 - Acquisition Parameters  
 Date\_ 20101117  
 Time\_ 0.12  
 INSTRUM spect  
 PROBHD 5 mm PABBO BB/  
 PULPROG zgpg30  
 TD 16384  
 SOLVENT CDC13  
 NS 1192  
 DS 4  
 SWH 30030.029 Hz  
 FIDRES 1.82088 Hz  
 AQ 0.2728436 sec  
 RG 2048  
 DW 16.650 usec  
 DE 6.50 usec  
 TE 297.2 K  
 D1 1.00000000 sec  
 d11 0.03000000 sec  
 DELTA 0.89999998 sec  
 T20 1  
 ===== CHANNEL f1 =====  
 NUC1 13C  
 P1 9.50 usec  
 PL1 -0.70 dB  
 SFO1 125.7602890 MHz  
 ===== CHANNEL f2 =====  
 CPDPRG2 waltz16  
 NUC2 1H  
 PCPD2 70.00 usec  
 PL2 -1.20 dB  
 PL12 12.30 dB  
 PL13 15.30 dB  
 SFO2 400.1325010 MHz  
 F2 - Processing parameters  
 SI 32768  
 SF 125.7577890 MHz  
 WDW EM  
 SSB 0  
 LB 2.00 Hz  
 GB 0  
 PC 1.40

Dimethoxy-1,4-CyclohepteneOAc-2  
 Experiment 6 Topspin 500  
 Tuesday 07 December 2010

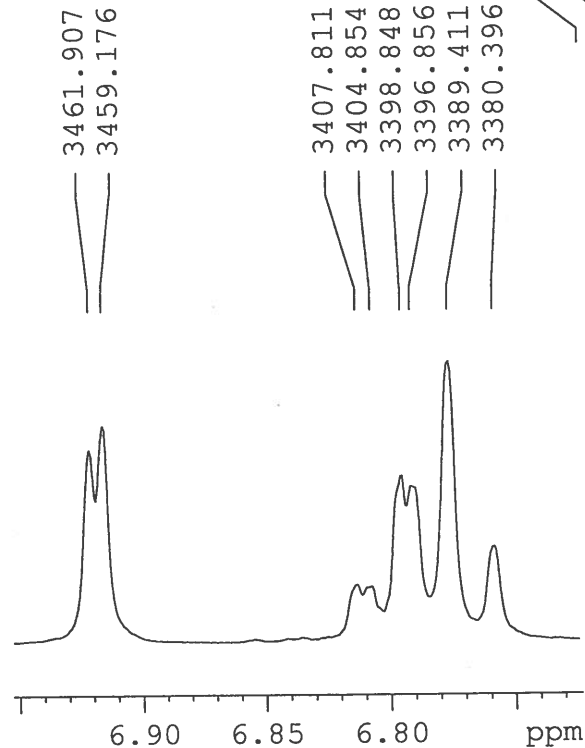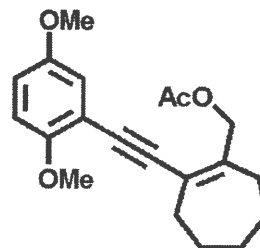

10i

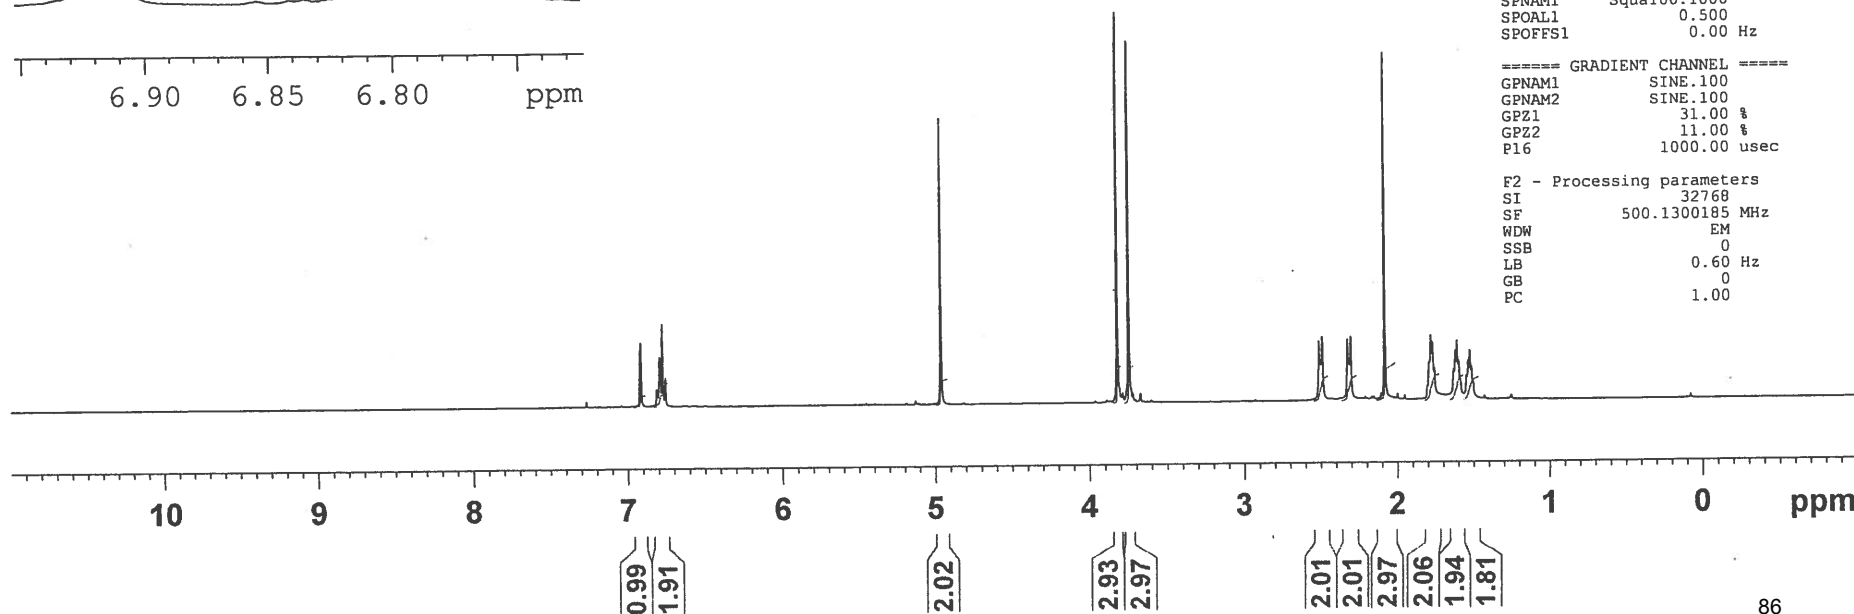

4.964  
 3.821  
 3.747  
 2.510  
 2.499  
 2.488  
 2.324  
 2.313  
 2.302  
 2.081  
 1.801  
 1.790  
 1.778  
 1.767  
 1.755  
 1.629  
 1.617  
 1.607  
 1.596  
 1.585  
 1.544  
 1.533  
 1.522  
 1.511  
 1.500

Current Data Parameters  
 NAME Dimethoxy-1,4-CyclohepteneOAc-2  
 EXPNO 6  
 PROCNO 1

F2 - Acquisition Parameters  
 Date\_ 20101207  
 Time 11.19  
 INSTRUM spect  
 PROBHD 5 mm PABBO BB/  
 PULPROG zgpg30  
 TD 32768  
 SOLVENT H2O  
 NS 8  
 DS 2  
 SWH 10964.912 Hz  
 FIDRES 0.334623 Hz  
 AQ 1.4942708 sec  
 RG 18  
 DW 45.600 usec  
 DE 6.50 usec  
 TE 294.2 K  
 D1 2.00000000 sec  
 d12 0.00002000 sec  
 D16 0.00020000 sec  
 TD0 1

===== CHANNEL f1 =====  
 NUC1: 1H  
 P1 14.80 usec  
 p2 29.60 usec  
 P12 2000.00 usec  
 PL0 120.00 dB  
 PL1 -1.40 dB  
 SFO1 500.1304501 MHz  
 SP1 35.19 dB  
 SPNAM1 Squal100.1000  
 SPOAL1 0.500  
 SPOFFS1 0.00 Hz

===== GRADIENT CHANNEL =====  
 GPNAM1 SINE.100  
 GPNAM2 SINE.100  
 GPZ1 31.00 %  
 GPZ2 11.00 %  
 P16 1000.00 usec

F2 - Processing parameters  
 SI 32768  
 SF 500.1300185 MHz  
 WDW EM  
 SSB 0  
 LB 0.60 Hz  
 GB 0  
 PC 1.00

Dimethoxy-1,4-CyclohepteneOAc-2  
 Experiment 7 13C Topspin 500  
 Tuesday 07 December 2010

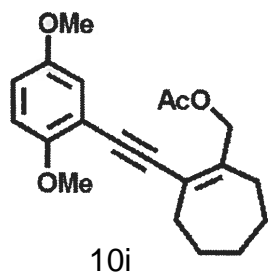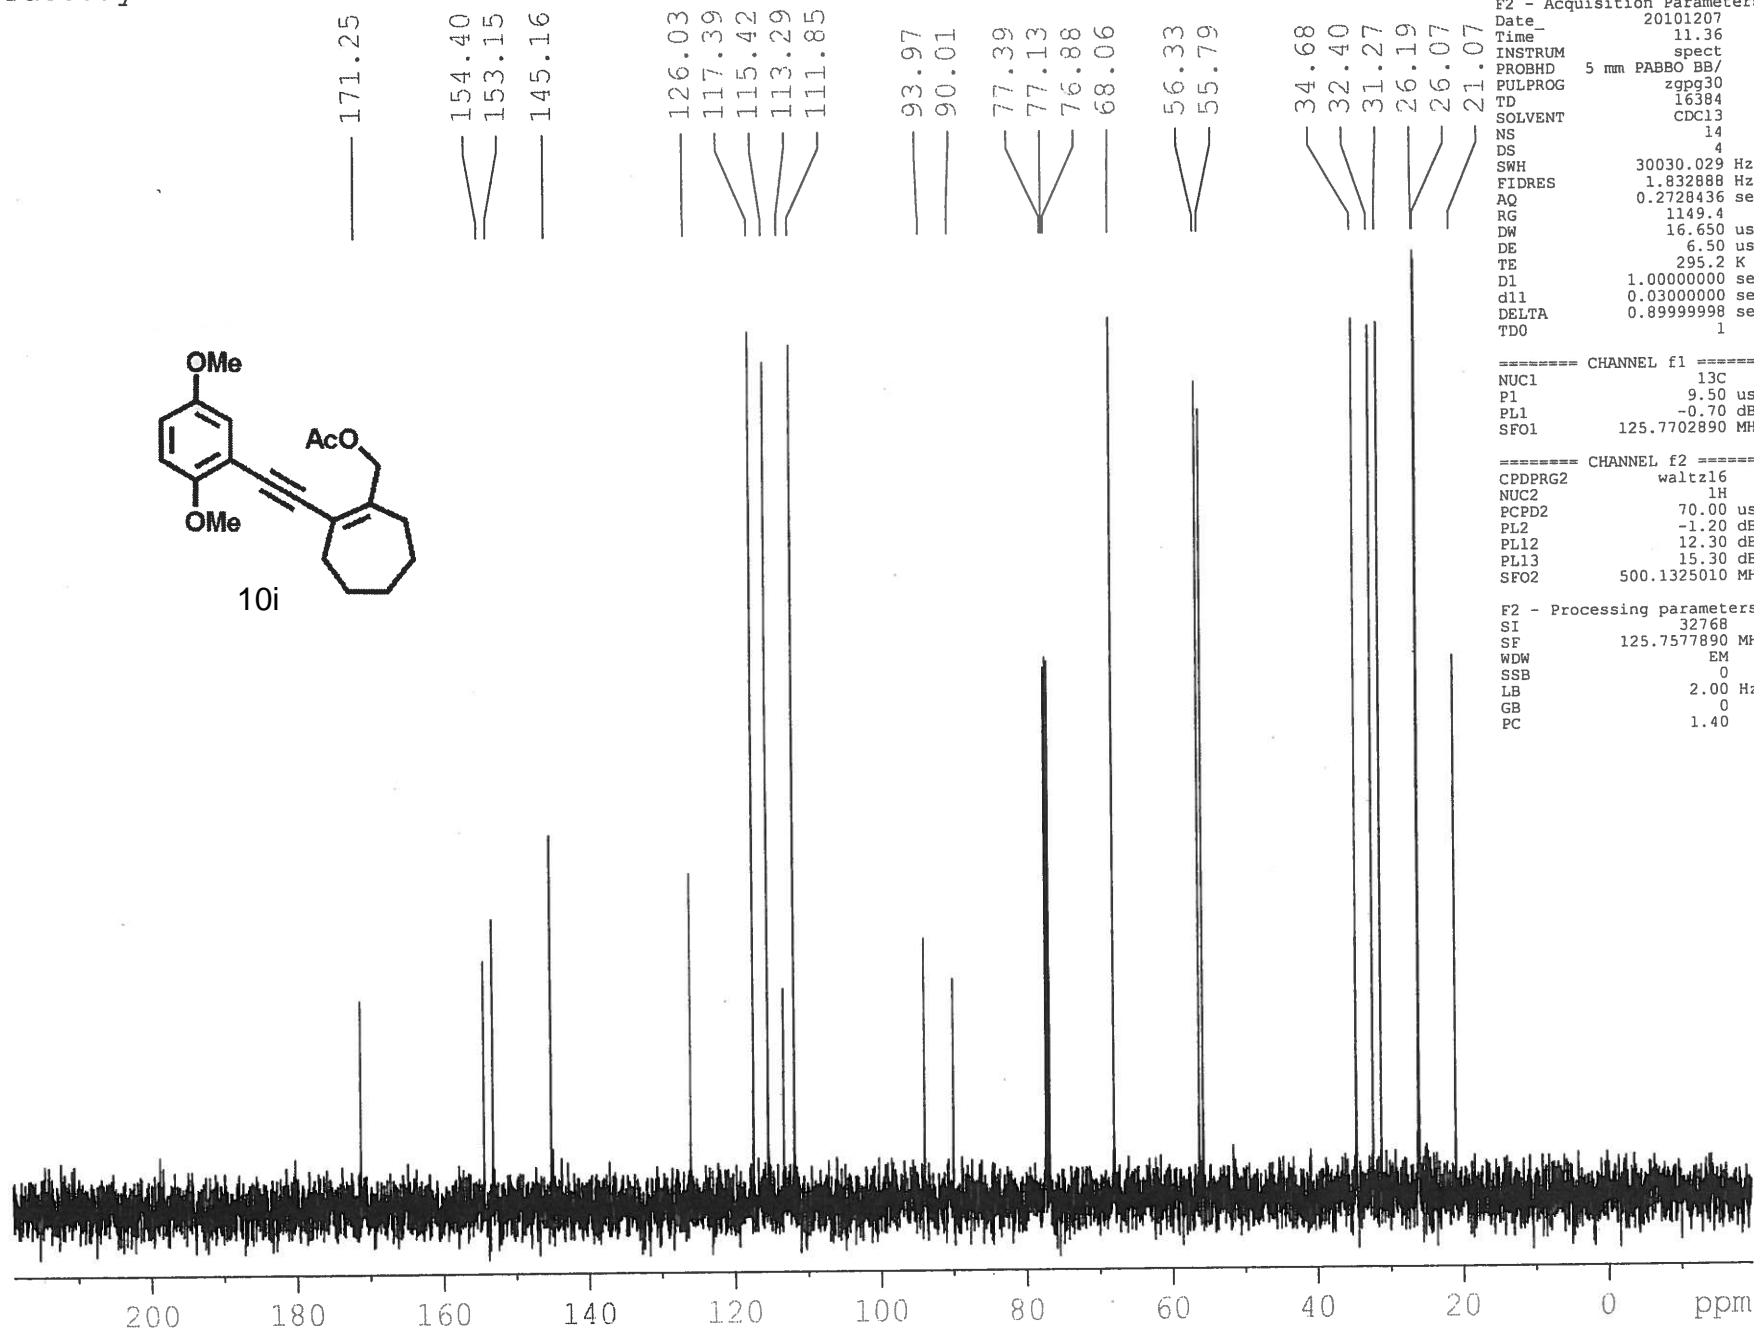

Current Data Parameters  
 NAME Dimethoxy-1,4-CyclohepteneOAc-2  
 EXPNO 7  
 PROCNO 1

F2 - Acquisition Parameters  
 Date\_ 20101207  
 Time 11.36  
 INSTRUM spect  
 PROBHD 5 mm PABBO BB/  
 PULPROG zgpg30  
 TD 16384  
 SOLVENT CDCl3  
 NS 4  
 DS 4  
 SWH 30030.029 Hz  
 FIDRES 1.832888 Hz  
 AQ 0.2728436 sec  
 RG 1149.4  
 DW 16.650 usec  
 DE 6.50 usec  
 TE 295.2 K  
 D1 1.0000000 sec  
 d11 0.0300000 sec  
 DELTA 0.89999998 sec  
 TDO 1

===== CHANNEL f1 =====  
 NUC1 13C  
 P1 9.50 usec  
 PL1 -0.70 dB  
 SFO1 125.7702890 MHz

===== CHANNEL f2 =====  
 CPDPRG2 waltz16  
 NUC2 1H  
 PCPD2 70.00 usec  
 PL2 -1.20 dB  
 PL12 12.30 dB  
 PL13 15.30 dB  
 SFO2 500.1325010 MHz

F2 - Processing parameters  
 SI 32768  
 SF 125.7577890 MHz  
 WDM EM  
 SSB 0  
 LB 2.00 Hz  
 GB 0  
 PC 1.40

Trimethoxy-4-CC-CyclopenteneOAc  
 Experiment 2  
 Topspin 500  
 Wednesday 29 September 2010

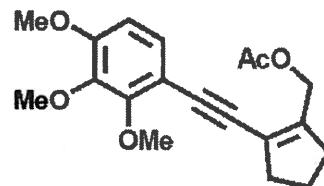

10j

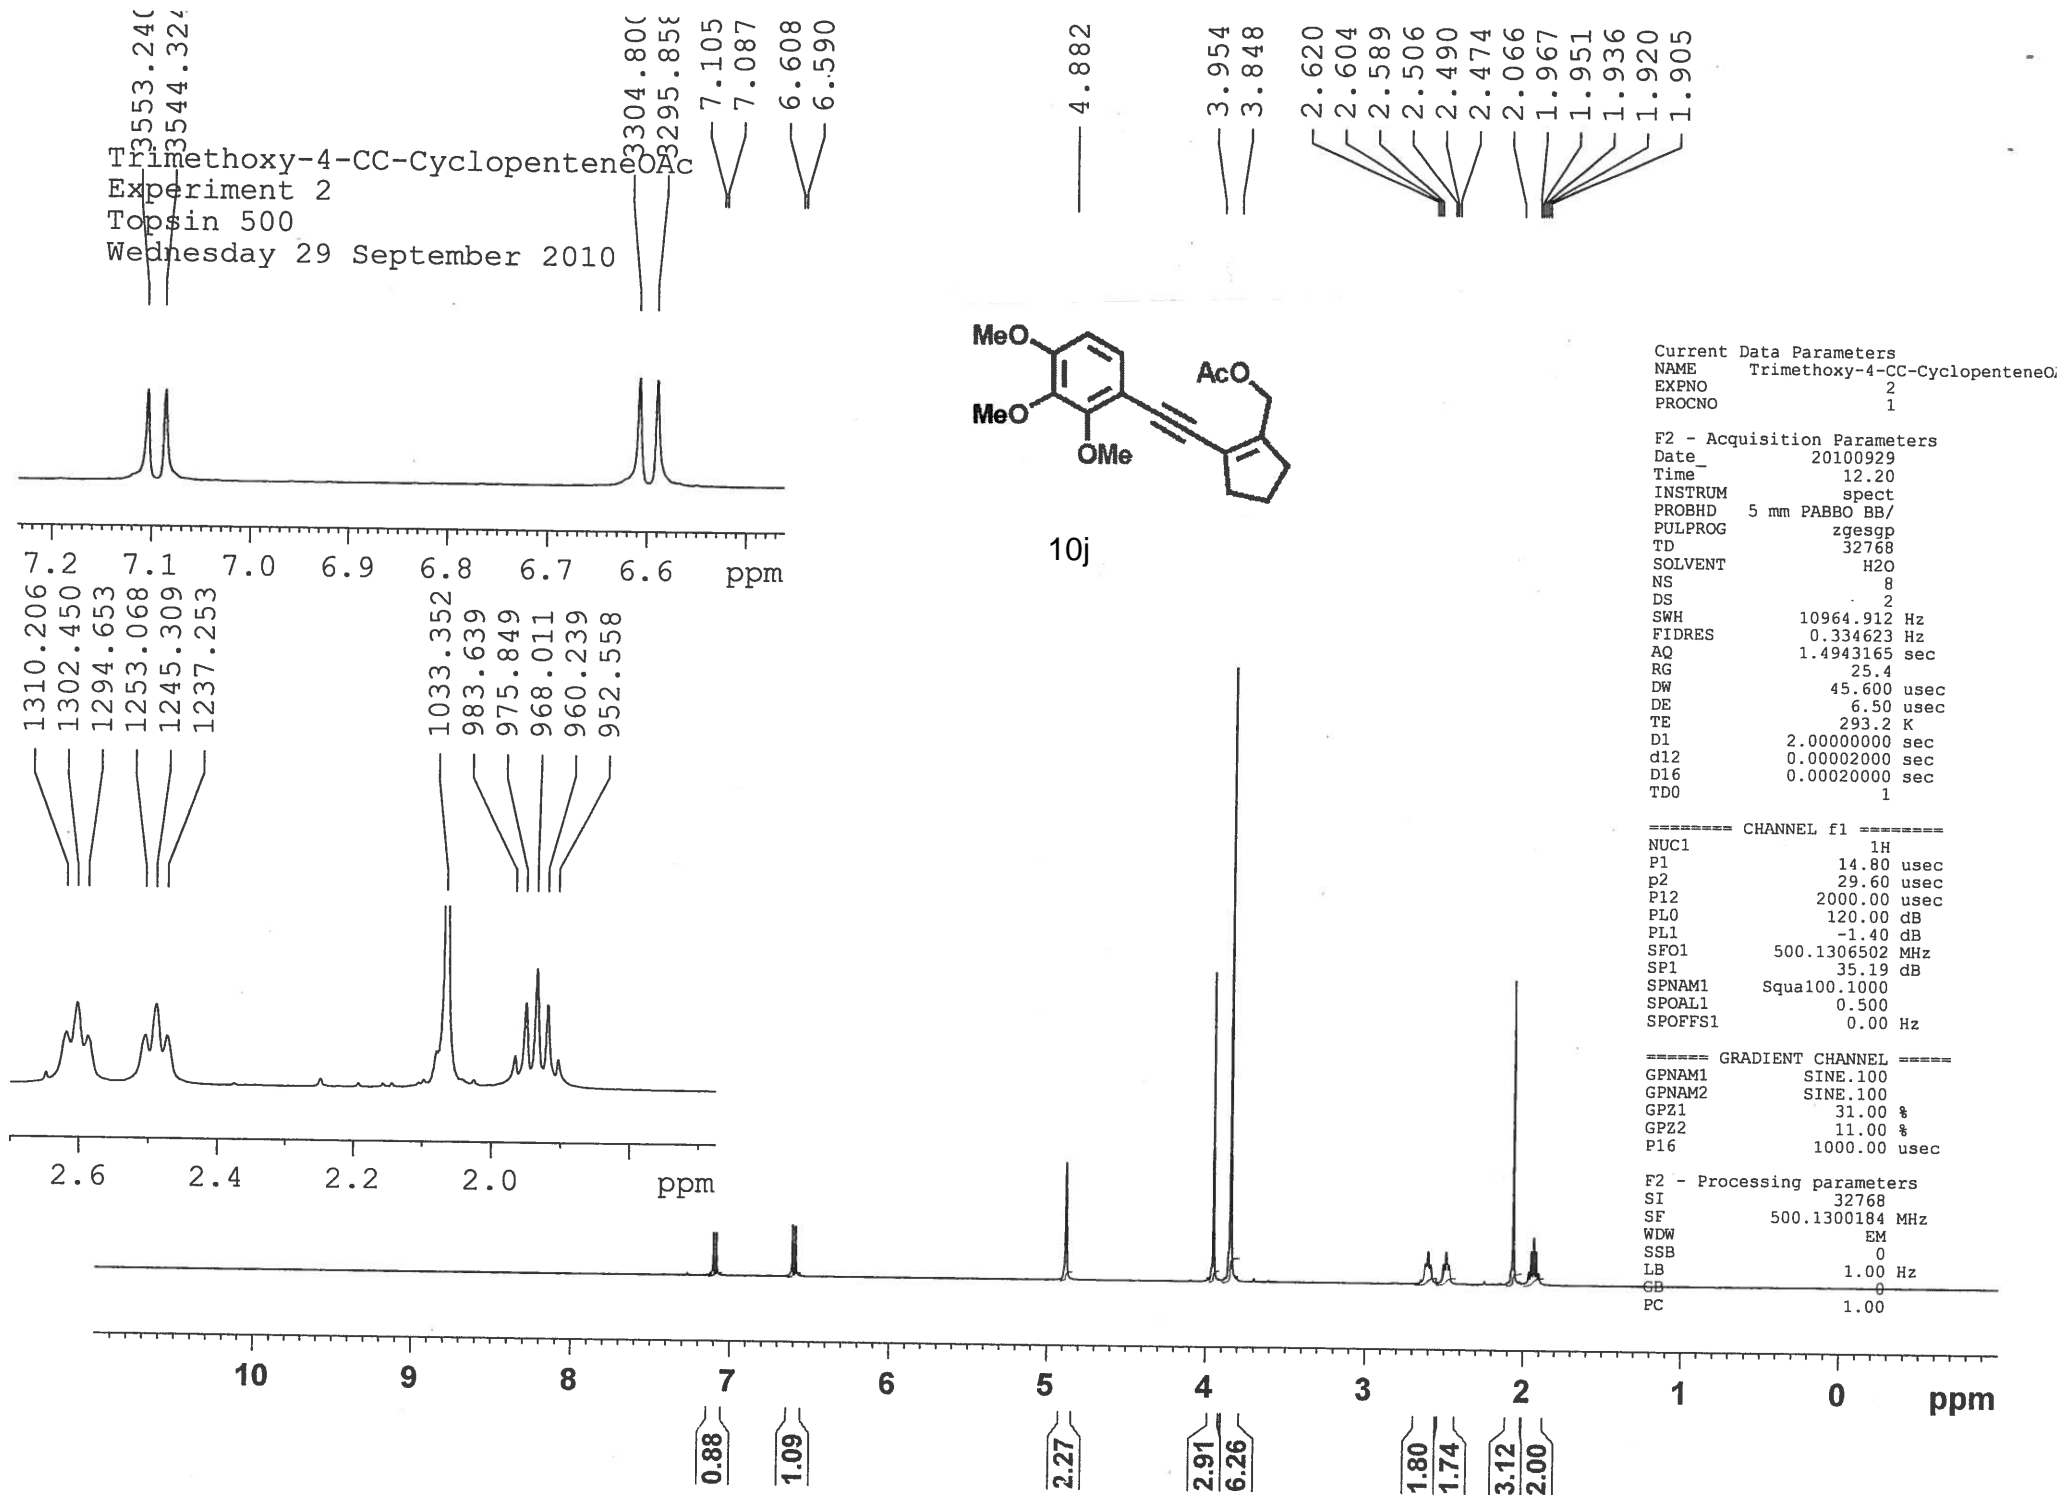

Current Data Parameters  
 NAME Trimethoxy-4-CC-CyclopenteneOAc  
 EXPNO 2  
 PROCNO 1

F2 - Acquisition Parameters  
 Date\_ 20100929  
 Time 12.20  
 INSTRUM spect  
 PROBHD 5 mm PABBO BB/  
 PULPROG zgpg30  
 TD 32768  
 SOLVENT H2O  
 NS 8  
 DS 2  
 SWH 10964.912 Hz  
 FIDRES 0.334623 Hz  
 AQ 1.4943165 sec  
 RG 25.4  
 DW 45.600 usec  
 DE 6.50 usec  
 TE 293.2 K  
 D1 2.00000000 sec  
 d12 0.00002000 sec  
 D16 0.00020000 sec  
 TD0 1

===== CHANNEL f1 =====  
 NUC1 1H  
 P1 14.80 usec  
 p2 29.60 usec  
 P12 2000.00 usec  
 PL0 120.00 dB  
 PL1 -1.40 dB  
 SFO1 500.1306502 MHz  
 SP1 35.19 dB  
 SPNAM1 Squa100.1000  
 SPOAL1 0.500  
 SPOFFS1 0.00 Hz

===== GRADIENT CHANNEL =====  
 GPNAM1 SINE.100  
 GPNAM2 SINE.100  
 GP21 31.00 %  
 GP22 11.00 %  
 P16 1000.00 usec

F2 - Processing parameters  
 SI 32768  
 SF 500.1300184 MHz  
 WDW EM  
 SSB 0  
 LB 1.00 Hz  
 GB 0  
 PC 1.00

Trimethoxy-4-CyclopenteneOAc 13C

Ultra 300

Wednesday 29 September 2010

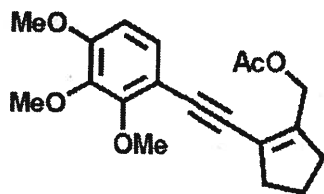

10j

220 200 180 160 140 120 100 80 60 40 20 0 ppm<sub>89</sub>

Current Data Parameters  
NAME Trimethoxy-4-CyclopenteneOAc  
EXPNO 1  
PROCNO 1

F2 - Acquisition Parameters  
Date\_ 20100929  
Time 13.08  
INSTRUM av300  
PROBHD 5 mm BBO BB-1H  
PULPROG zgpg30  
TD 16384  
SOLVENT C6D6  
NS 1382  
DS 4  
SWH 17985.611 Hz  
FIDRES 1.097755 Hz  
AQ 0.4555252 sec  
RG 20642.5  
DW 27.800 usec  
DE 6.00 usec  
TE 300.0 K  
D1 1.00000000 sec  
d11 0.03000000 sec  
d12 0.00002000 sec

===== CHANNEL f1 =====  
NUC1 13C  
P1 11.25 usec  
PL1 0.00 dB  
SFO1 75.4752953 MHz

===== CHANNEL f2 =====  
CPDPRG2 waltz16  
NUC2 1H  
PCPD2 80.00 usec  
PL2 0.00 dB  
PL12 16.55 dB  
PL13 24.00 dB  
SFO2 300.1312005 MHz

F2 - Processing parameters  
SI 8192  
SF 75.4677423 MHz  
WDW EM  
SSB 0  
LB 2.50 Hz  
GB 0  
PC 1.40

Trimethoxy-4-CC-CyclohexeneOAc  
 Experiment 4 Topsin 500  
 Friday 30 July 2010

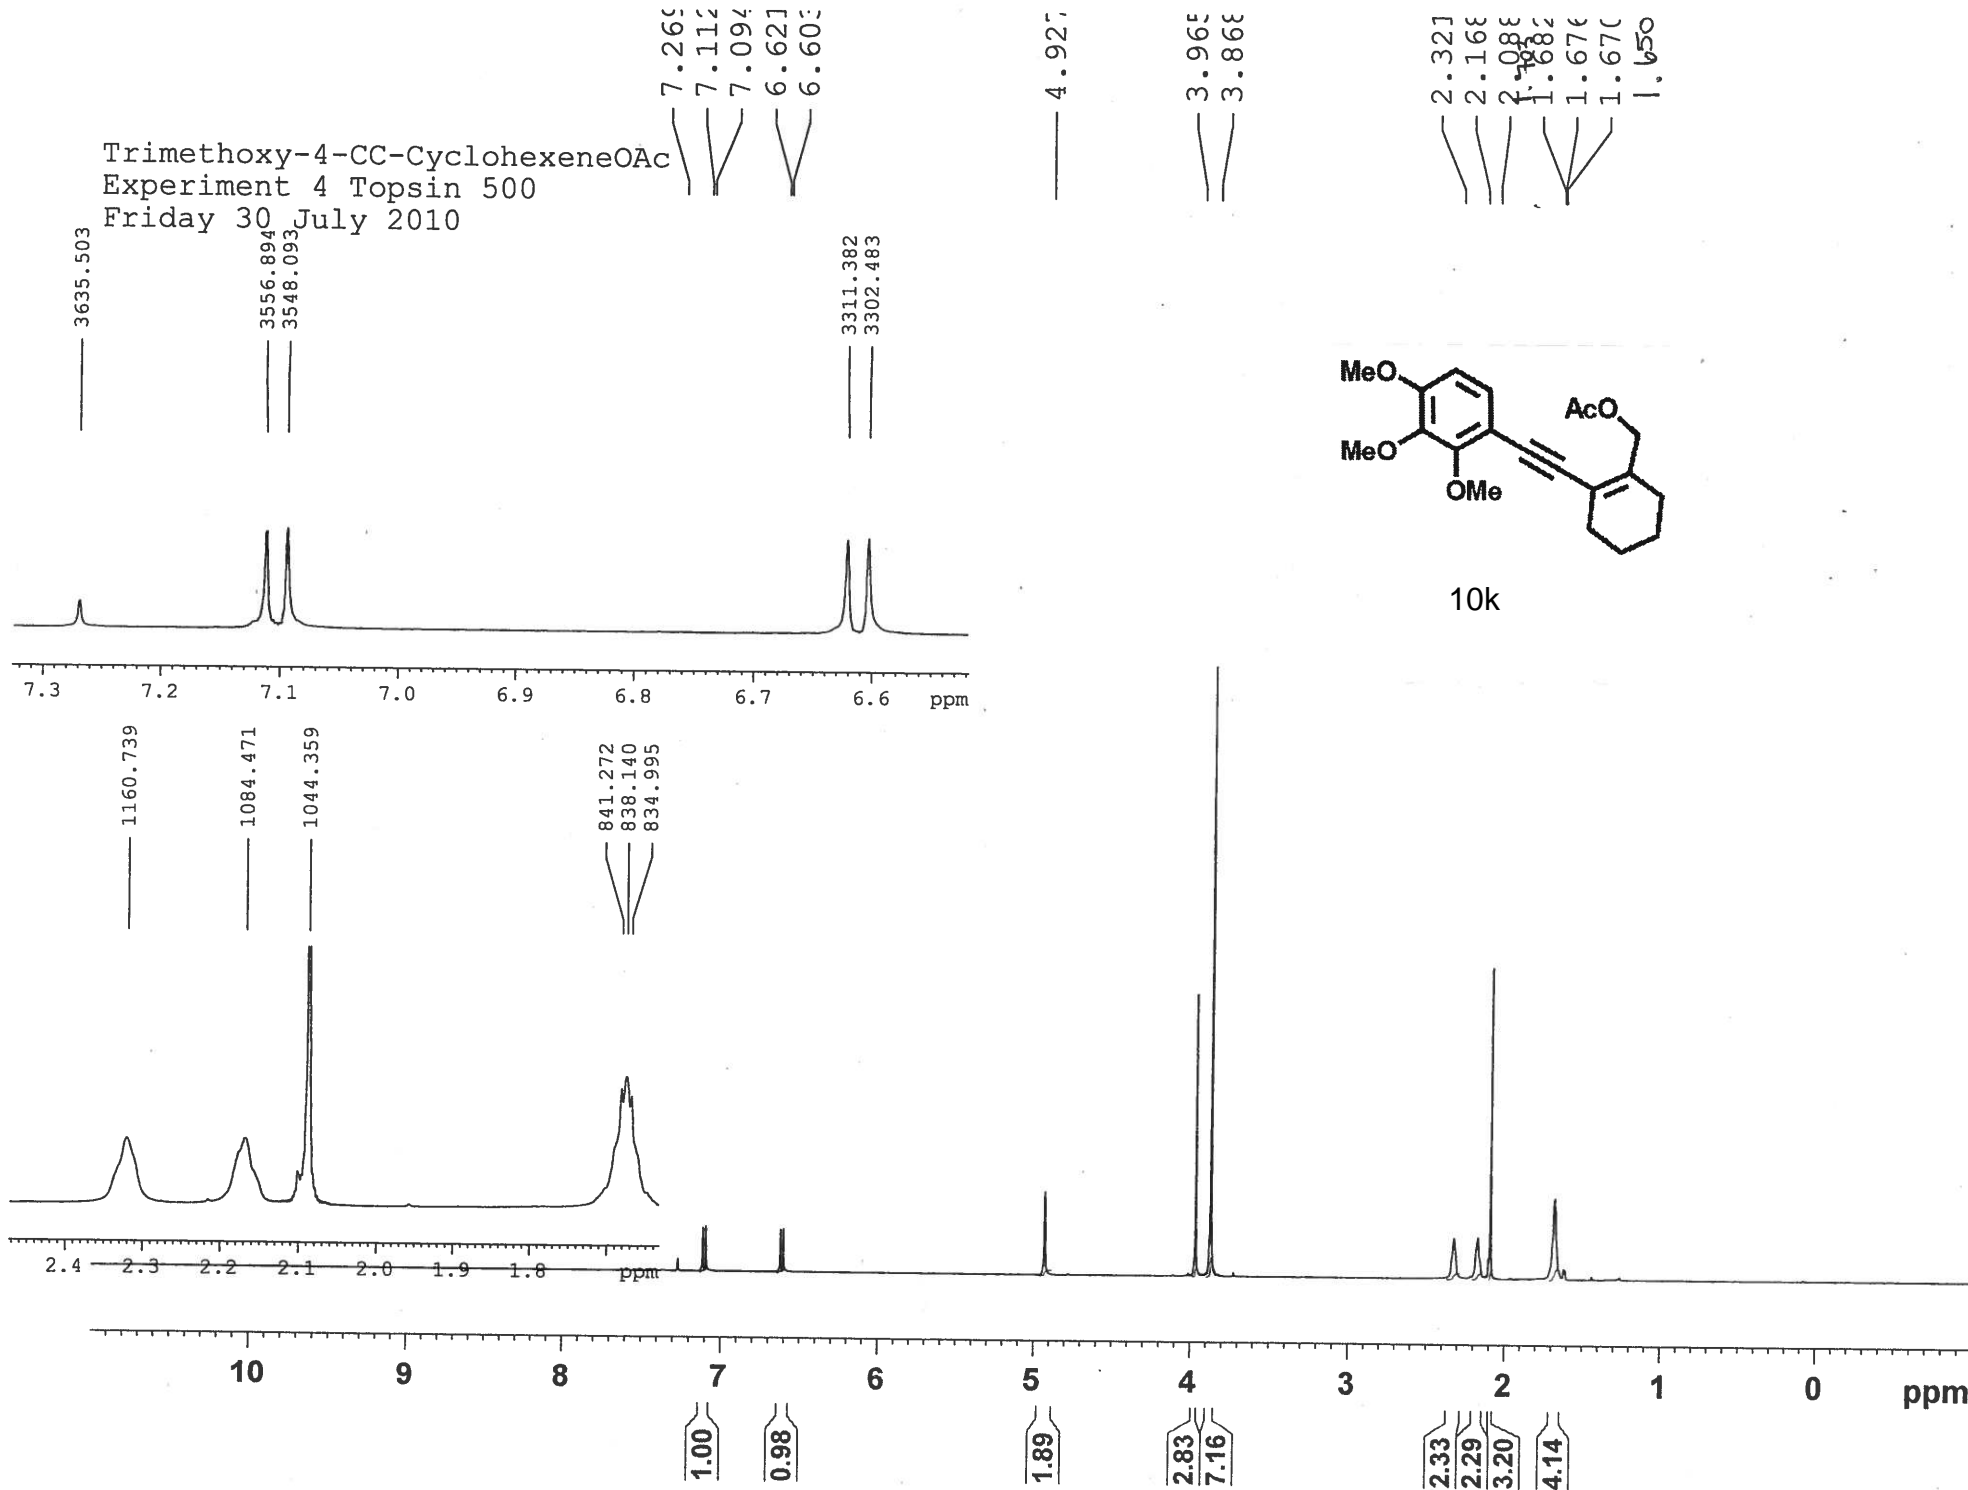

Trimethoxybenzene-4-CC-CyclohexeneOAc 13C

Experiment 3

300 ULtra

Friday 30 July 2010

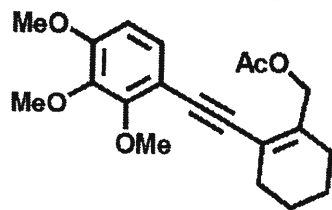

10k

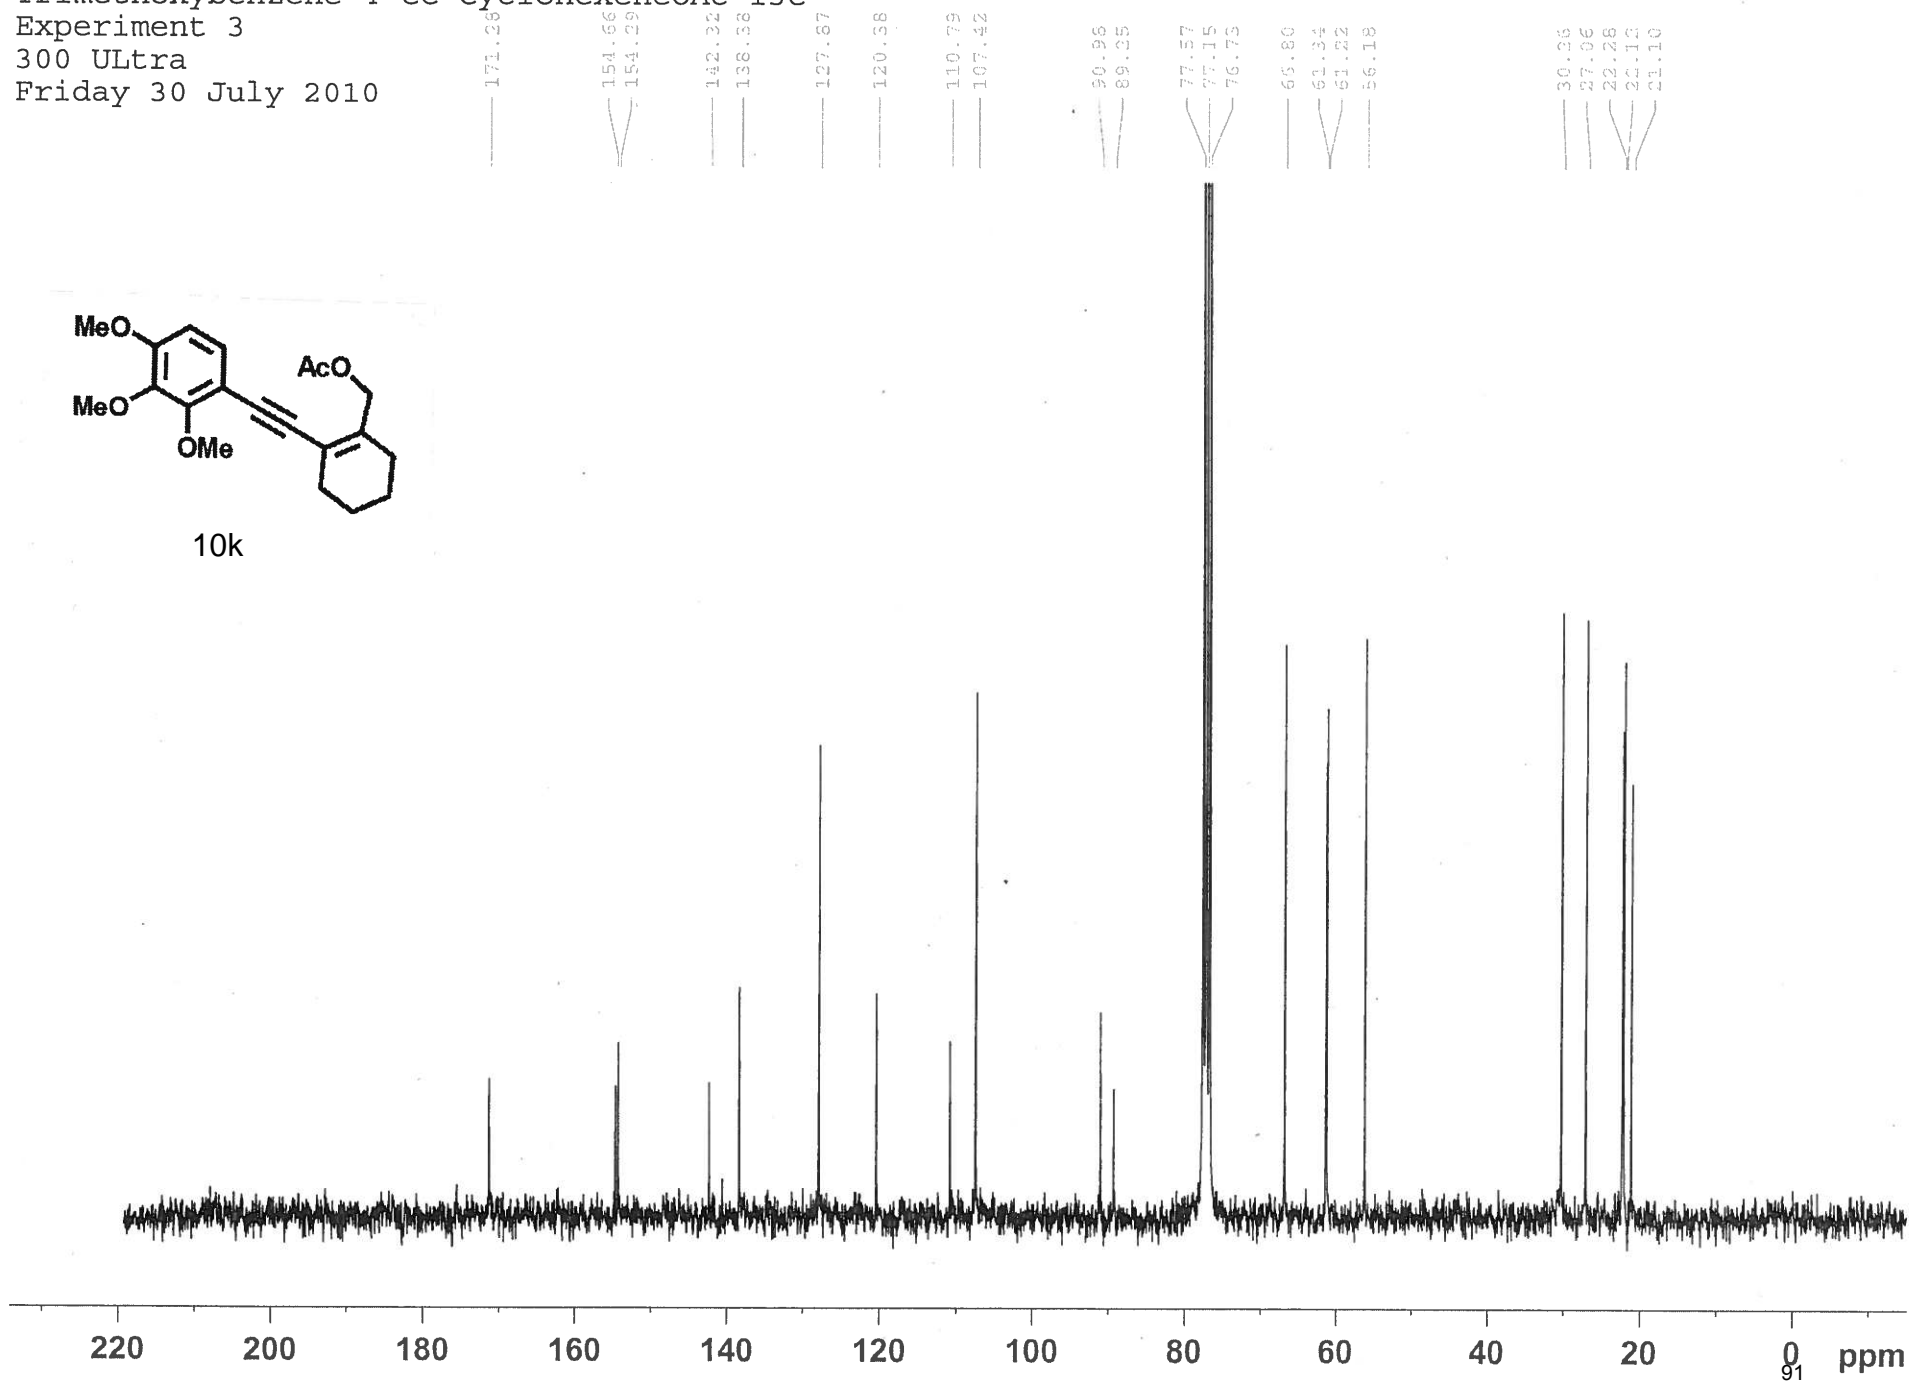

Trimethoxy-4-CC-Cyclohexene-Me-OAc

500 Topsin

1 September 2009

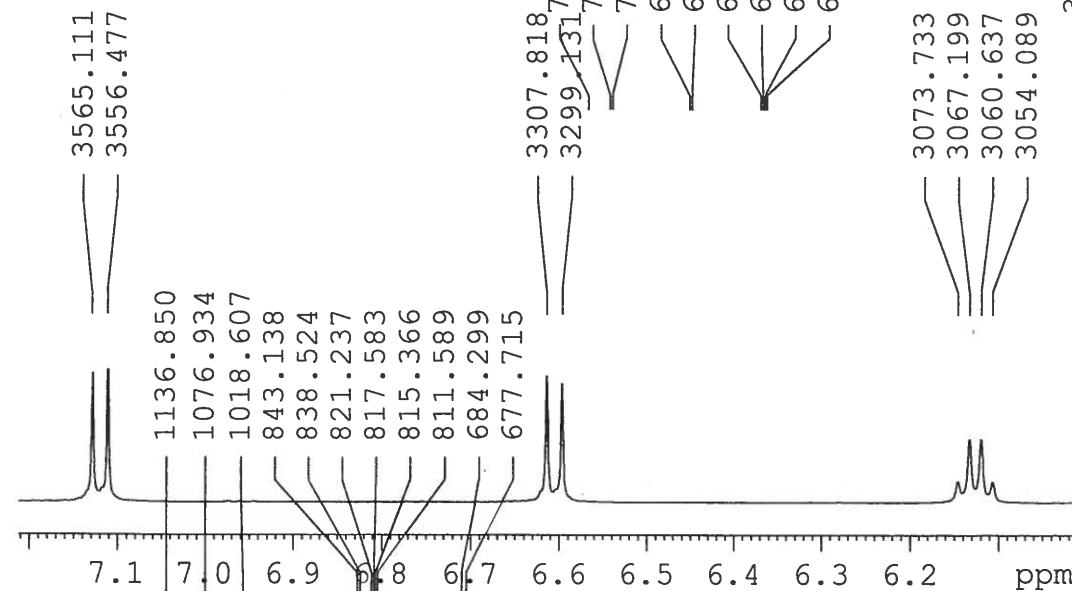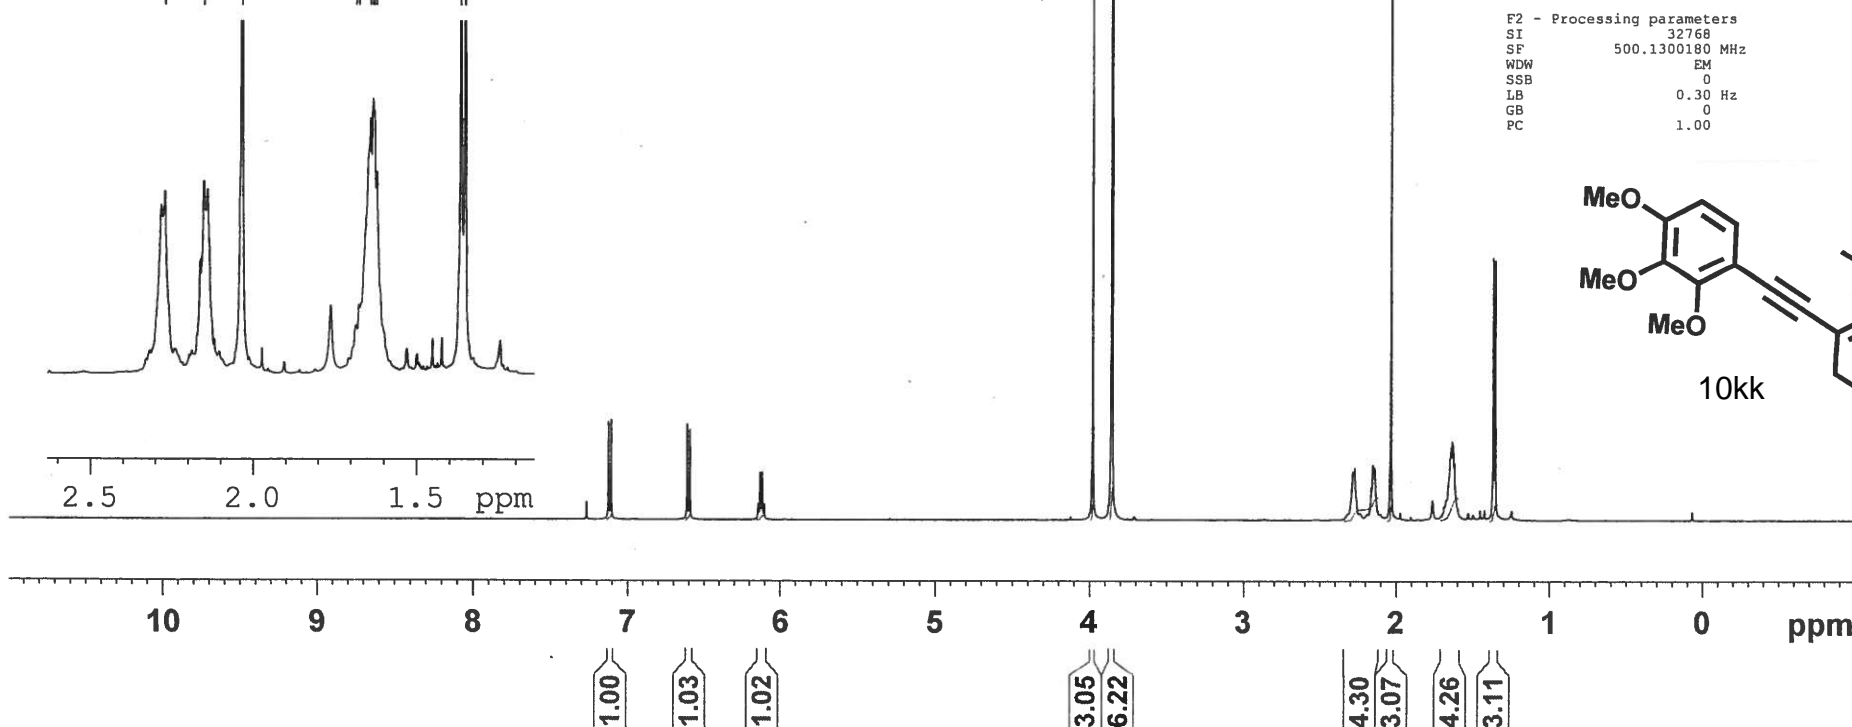

Current Data Parameters  
NAME Trimethoxy-4-CC-Cyclohexene-Me-OAc  
EXPNO 1  
PROCNO 1

F2 - Acquisition Parameters  
Date 20090901  
Time 13.47  
INSTRUM spect  
PROBHD 5 mm PABBO BB/  
PULPROG zg30  
TD 65536  
SOLVENT CDC13  
NS 8  
DS 2  
SWH 10330.578 Hz  
FIDRES 0.157632 Hz  
AQ 3.1719923 sec  
RG 90.5  
DW 48.400 usec  
DE 6.50 usec  
TE 294.2 K  
D1 1.00000000 sec  
TD0 1

===== CHANNEL f1 =====  
NUC1 1H  
P1 15.00 usec  
PL1 0.50 dB  
SFO1 500.1330885 MHz

F2 - Processing parameters  
SI 32768  
SF 500.1300180 MHz  
WDW EM  
SSB 0  
LB 0.30 Hz  
GB 0  
PC 1.00

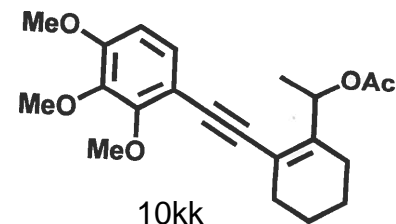



Trimethoxybenzene-4-CC-Cyclohexene-Me-OAc 13C

300 Ultra

1 September 2009

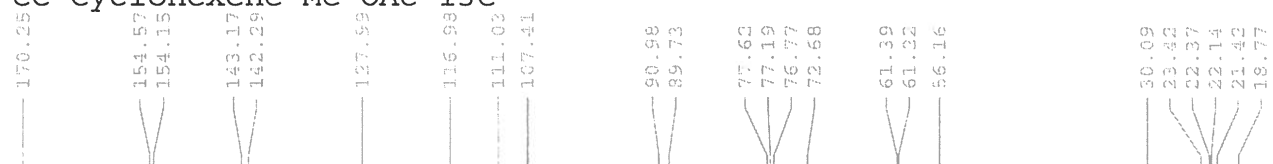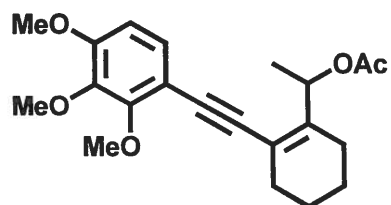

10kk

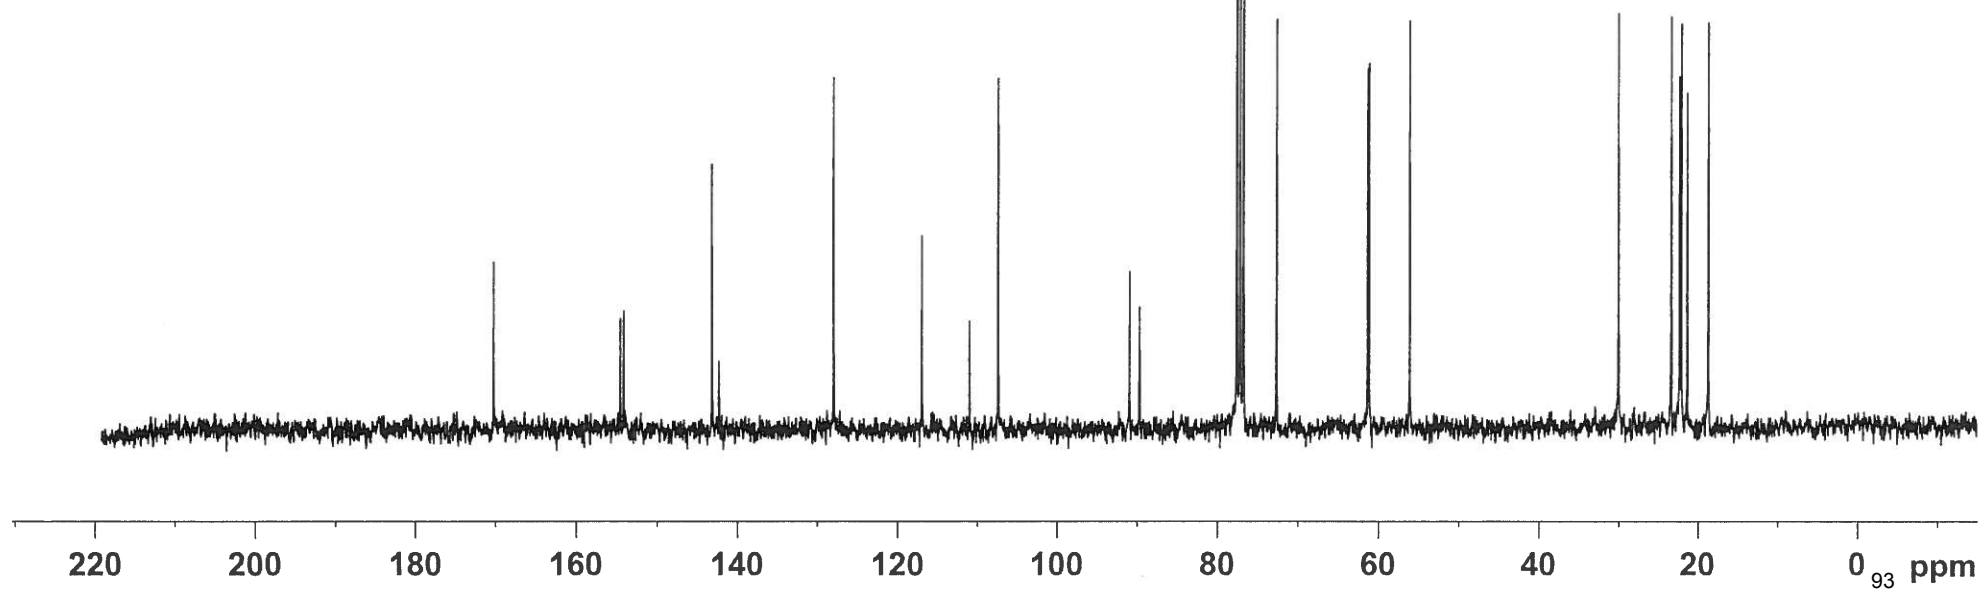

Trimethoxy-5-CC-CyclopenteneOAc  
 Experiment 2 Topspin 500  
 Thursday 13 October 2011

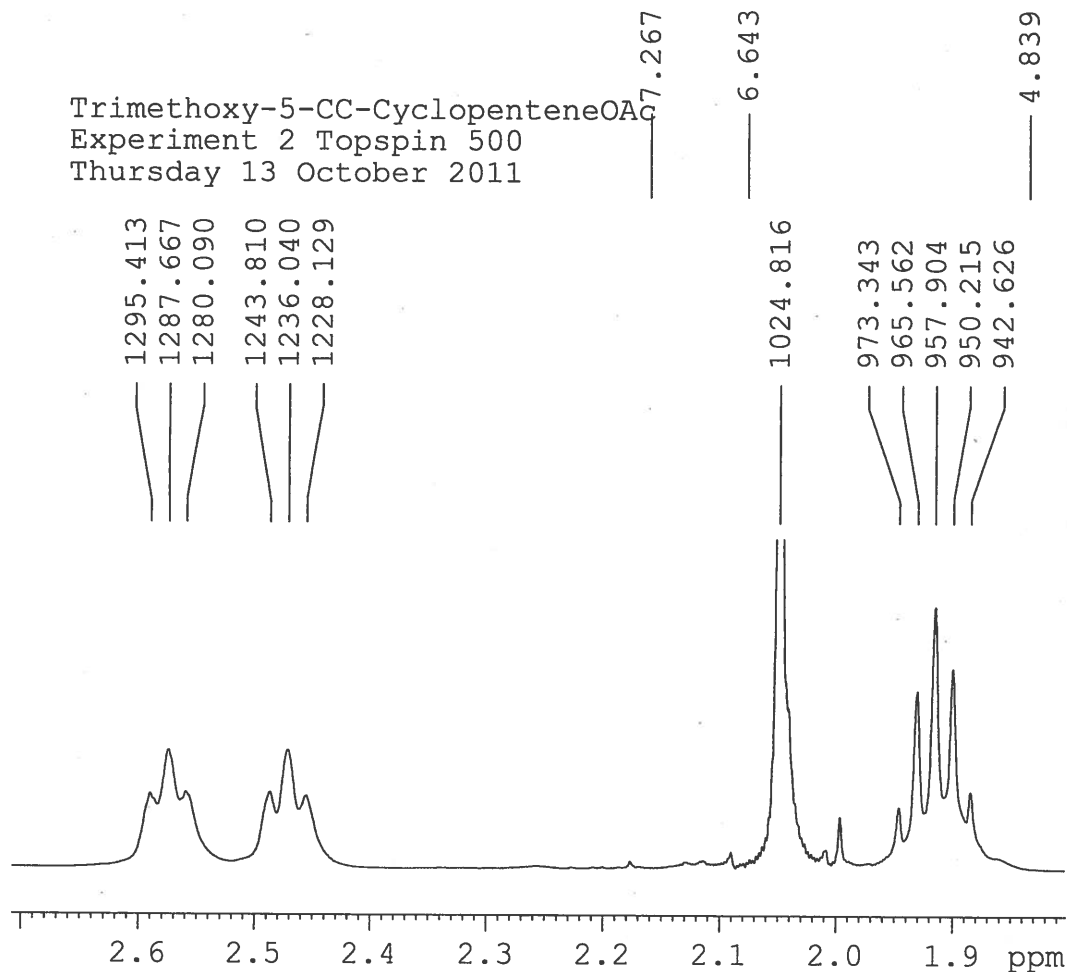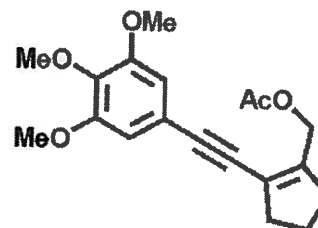

3.817  
 3.811  
 2.590  
 2.575  
 2.559  
 2.487  
 2.471  
 2.456  
 2.049  
 1.946  
 1.931  
 1.915  
 1.900  
 1.885

Current Data Parameters  
 NAME Trimethoxy-5-CC-CyclopenteneOAc  
 EXPNO 2  
 PROCNO 1

F2 - Acquisition Parameters  
 Date\_ 20111013  
 Time\_ 16.01  
 INSTRUM spect  
 PROBHD 5 mm Multinucl  
 PULPROG zgpg30  
 TD 32768  
 SOLVENT C6D6  
 NS 8  
 DS 2  
 SWH 10964.912 Hz  
 FIDRES 0.334623 Hz  
 AQ 1.4943165 sec  
 RG 20.2  
 DW 45.600 usec  
 DE 6.50 usec  
 TE 296.2 K  
 D1 2.00000000 sec  
 d12 0.00002000 sec  
 D16 0.00020000 sec  
 TD0 1

===== CHANNEL f1 =====  
 NUC1 1H  
 P1 14.80 usec  
 p2 29.60 usec  
 P12 2000.00 usec  
 PL0 120.00 dB  
 PL1 -1.40 dB  
 SF01 500.1305501 MHz  
 SP1 35.19 dB  
 SPNAM1 Squa100.1000  
 SPOAL1 0.500  
 SPOFFS1 0.00 Hz

===== GRADIENT CHANNEL =====  
 GPNAM1 SINE.100  
 GPNAM2 SINE.100  
 GPZ1 31.00 %  
 GPZ2 11.00 %  
 P16 1000.00 usec

F2 - Processing parameters  
 SI 32768  
 SF 500.1300190 MHz  
 WDW EM  
 SSB 0  
 LB 1.00 Hz  
 GB 0  
 PC 1.00

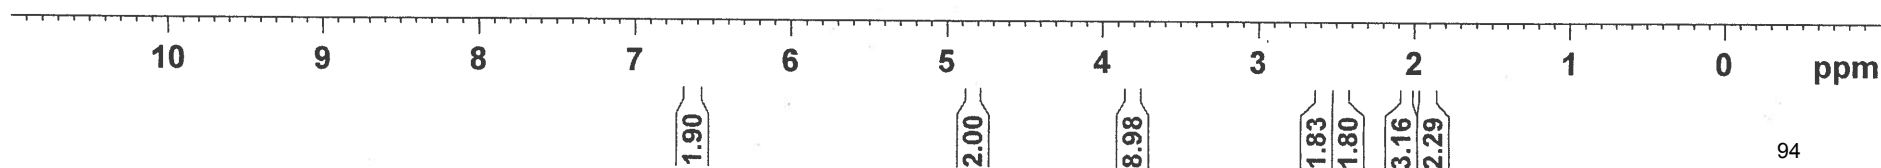

imethoxy-5-CC-CyclopenteneOAc 13C  
 periment 1 Topspin Ultra 300  
 ursday 13 October 2011

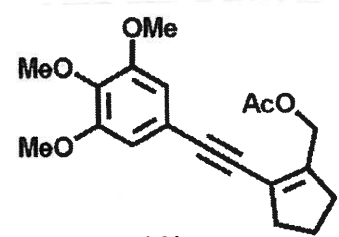

101

```

NAME Trimethoxy-5-CC-CyclopenteneOAc 13C
EXPNO 1
PROCNO 1
Date_ 20111013
Time 16.22
INSTRUM spect
PROBHD 5 mm PABBO BB-
PULPROG zgpg30
TD 16384
SOLVENT CDCl3
HS 130
DS 4
SWH 17985.611 Hz
FIDRES 1.067755 Hz
AQ 0.4555252 sec
RG 20642.5
WDW 27.800 usec
DE 6.00 usec
TE 295.9 K
D1 1.00000000 sec
D11 0.03000000 sec
TD0 1

===== CHANNEL f1 =====
NUC1 13C
P1 11.25 usec
PL1 0.00 dB
SFO1 75.4752953 MHz

===== CHANNEL f2 =====
CPDPRG2 waltz16
NUC2 1H
PCPD2 80.00 usec
PL2 0.00 dB
PL12 16.55 dB
PL13 24.00 dB
SFO2 300.1312005 MHz
SI 0192
SF 75.4677423 MHz
WDW EM
SSB 0
LB 2.50 Hz
GB 0
PC 1.40
  
```

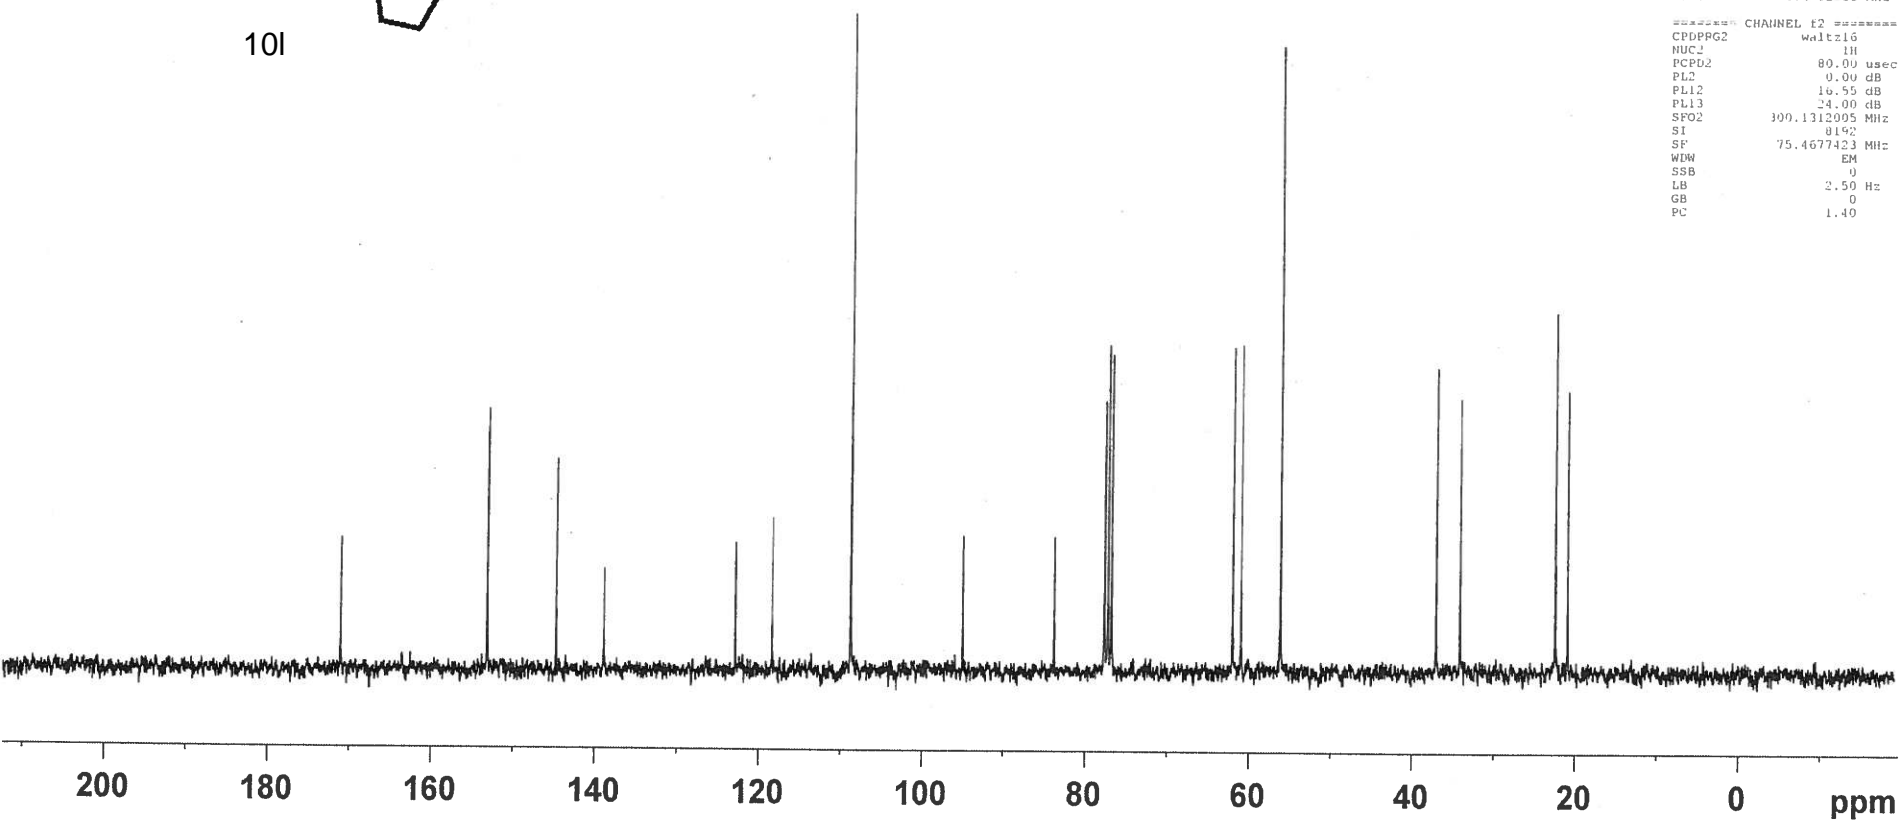

Trimethoxy-5-CC-CyclohexeneOAc  
Experiment 3  
500 Topsin  
1 April 2010

7.263

6.661

4.888

3.854  
3.846

2.298  
2.167  
2.086  
1.699  
1.679  
1.672  
1.666  
1.645

1149.237

1084.000

1043.206

849.786  
839.711  
836.402  
833.325  
822.800

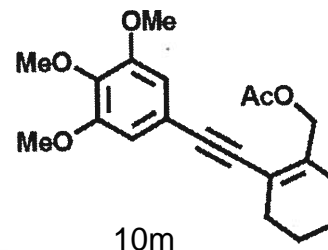

Current Data Parameters  
NAME Trimethoxy-5-CC-CyclohexeneOAc  
EXPNO 3  
PROCNO 1

F2 - Acquisition Parameters  
Date\_ 20100401  
Time\_ 15.09  
INSTRUM spect  
PROBHD 5 mm PABBO BB/  
PULPROG zgpg30  
TD 32768  
SOLVENT H2O  
NS 16  
DS 2  
SWH 10964.912 Hz  
FIDRES 0.334623 Hz  
AQ 1.4942708 sec  
RG 32  
DW 45.600 usec  
DE 6.50 usec  
TE 299.2 K  
D1 2.00000000 sec  
d12 0.00002000 sec  
D16 0.00020000 sec  
TD0 1

===== CHANNEL f1 =====  
NUC1 1H  
P1 14.80 usec  
P2 29.60 usec  
PL1 2000.00 usec  
PL0 120.00 dB  
PL1 -1.40 dB  
SFO1 500.1306482 MHz  
SP1 35.19 dB  
SPNAM1 Squa100.1000  
SPOAL1 0.500  
SPOFFS1 0.00 Hz

===== GRADIENT CHANNEL =====  
GPNAM1 SINE.100  
GPNAM2 SINE.100  
GPZ1 31.00 %  
GPZ2 11.00 %  
P16 1000.00 usec

F2 - Processing parameters  
SI 32768  
SF 500.1300222 MHz  
WDW EM  
SSB 0  
LB 0.30 Hz  
GB 0  
PC 1.00

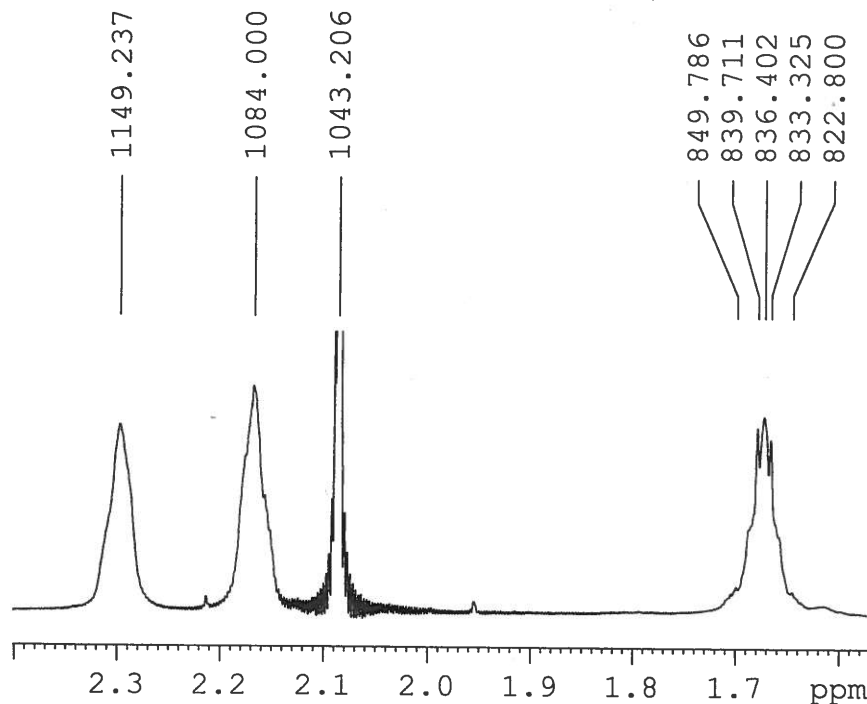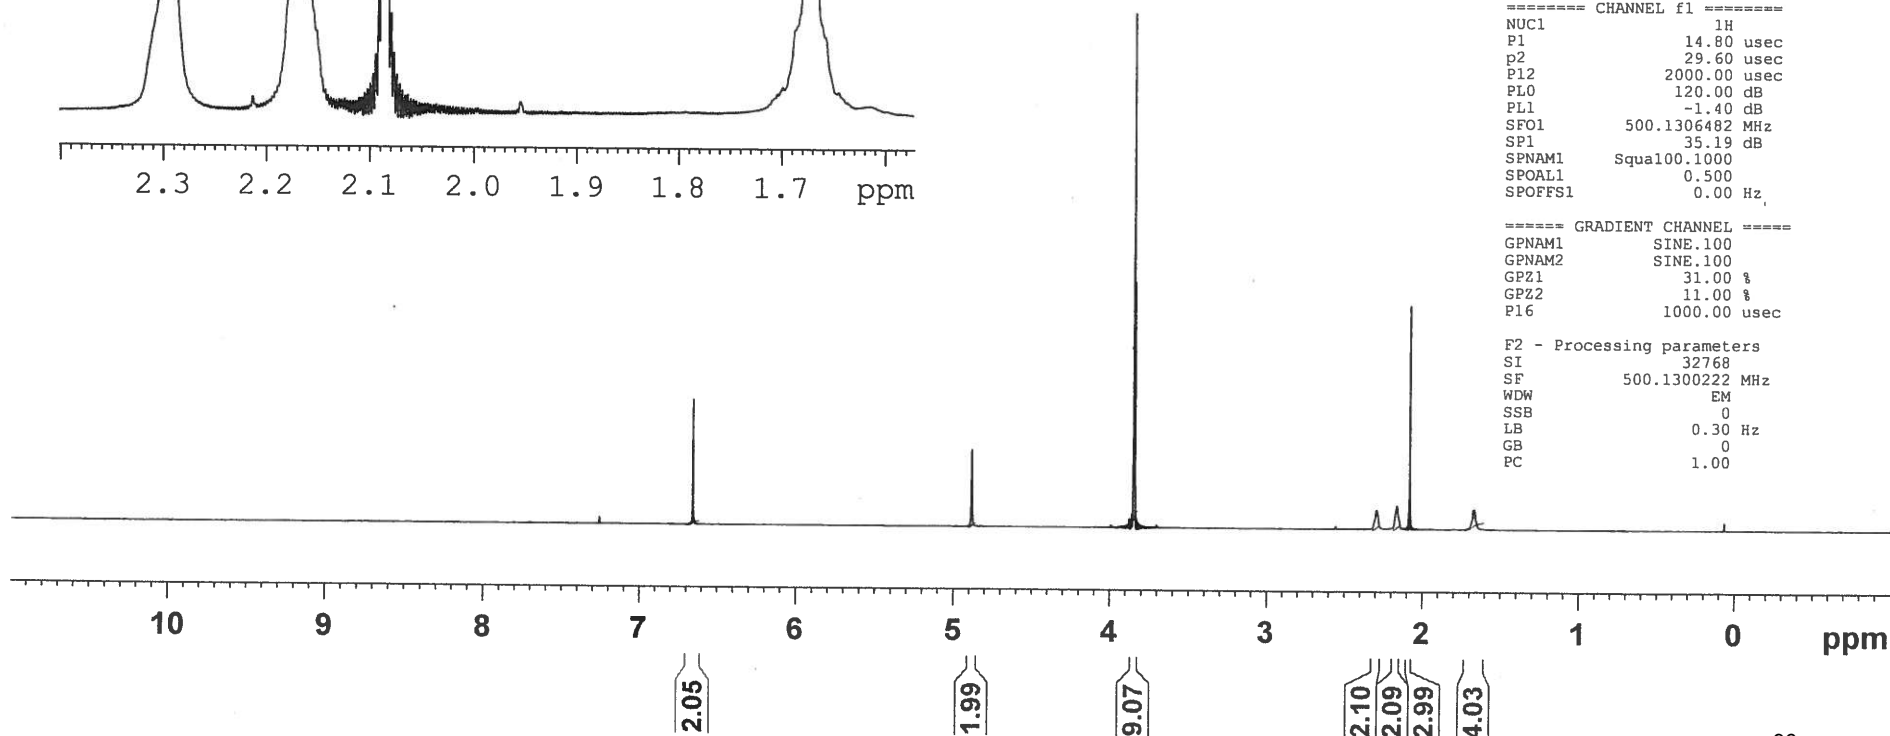

Trimethoxy-5-CyclohexeneOac-13C

300 Ultra

Experiment 3

1 April 2010

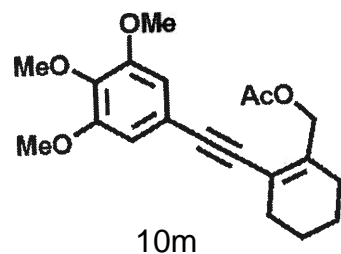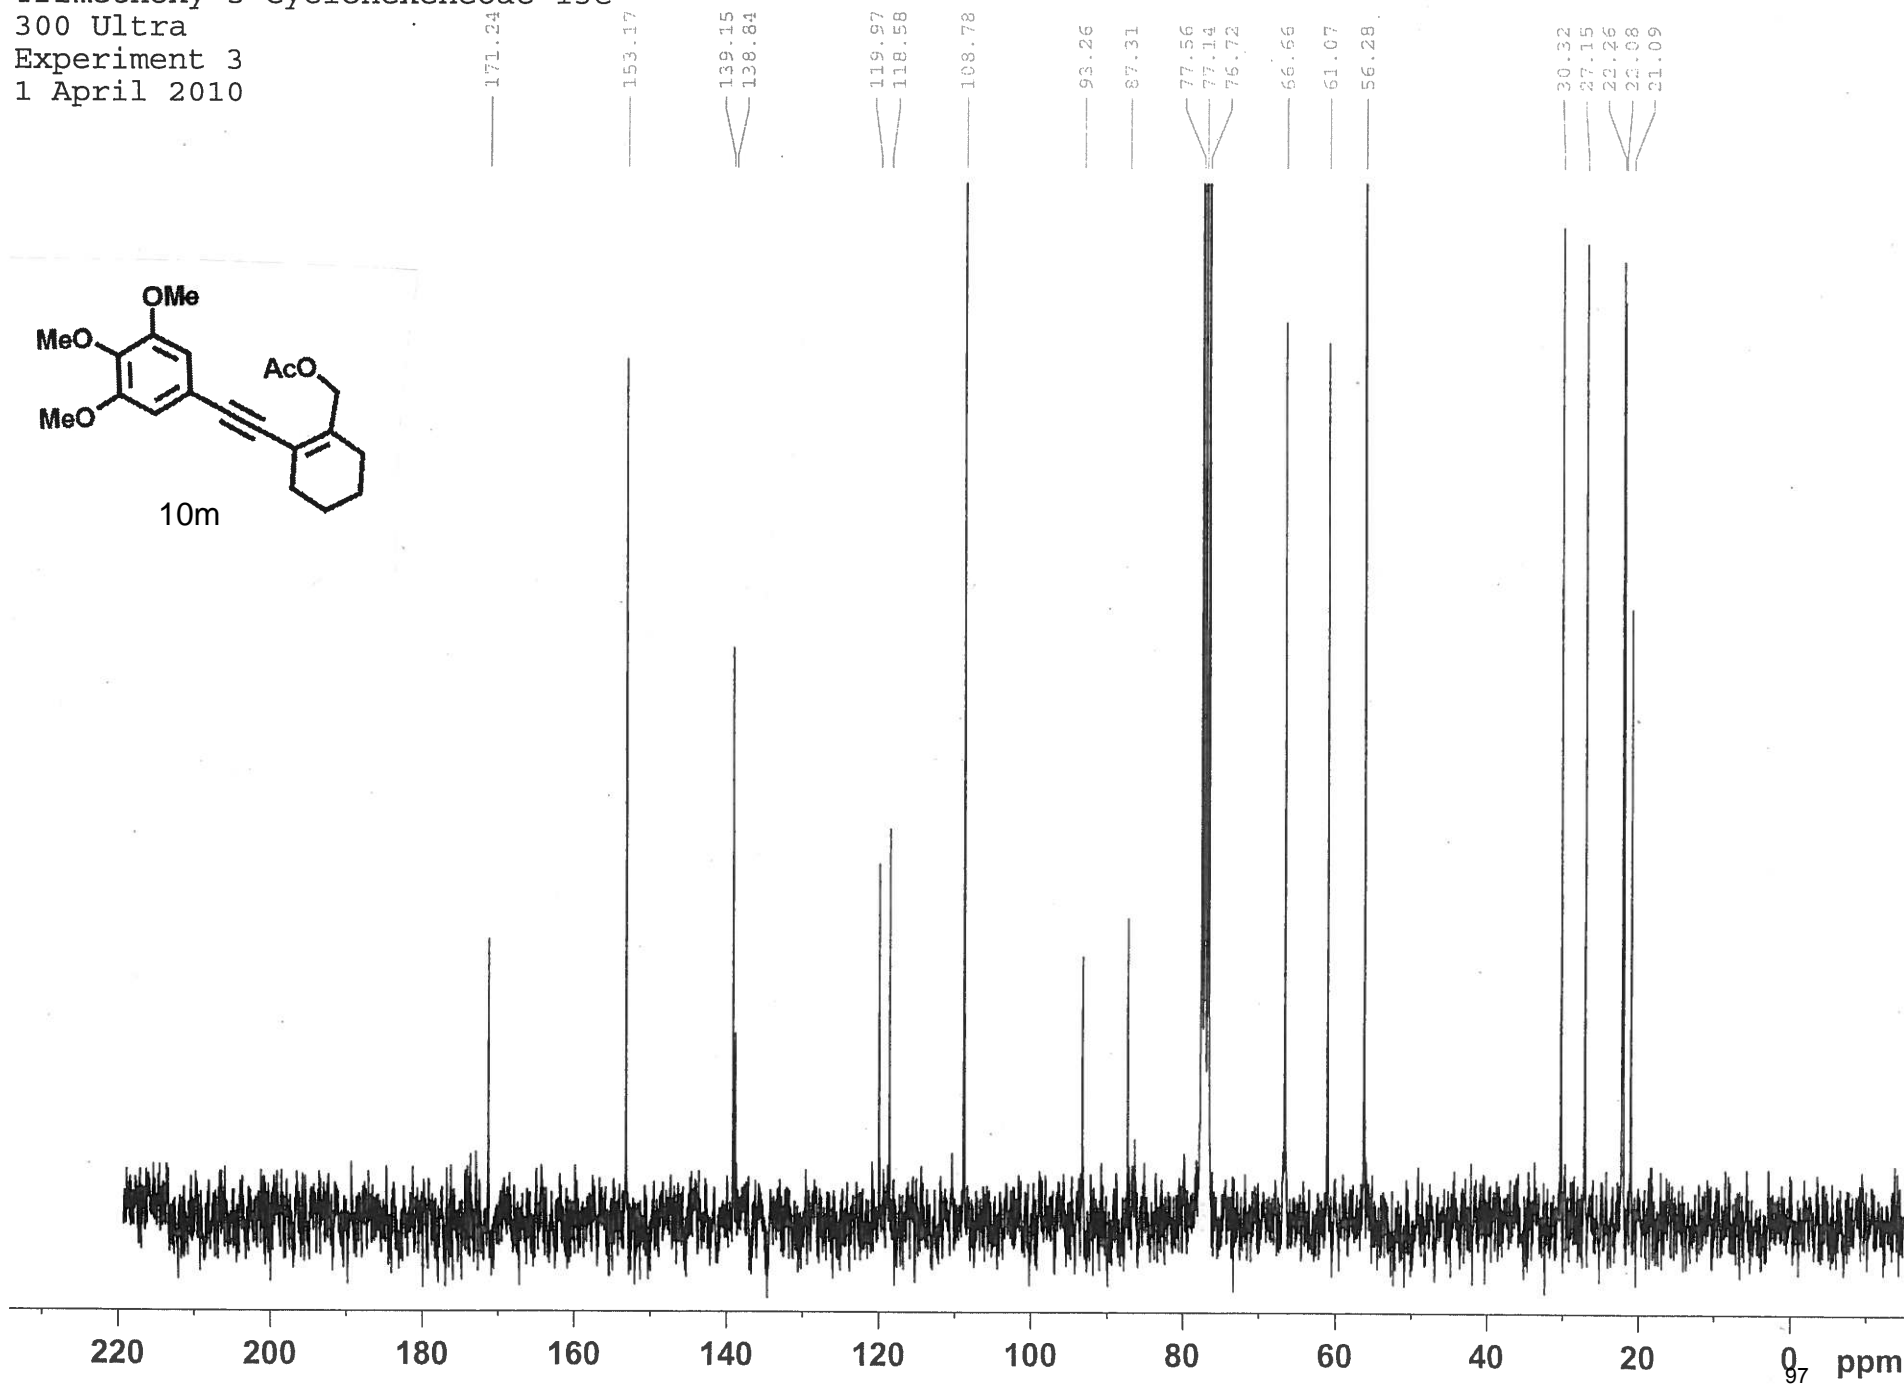

Trimethoxy-5-CC-Cyclohexene-Ph-OAc

Experiment 4

Topsin 500

Wednesday 11 August 2010

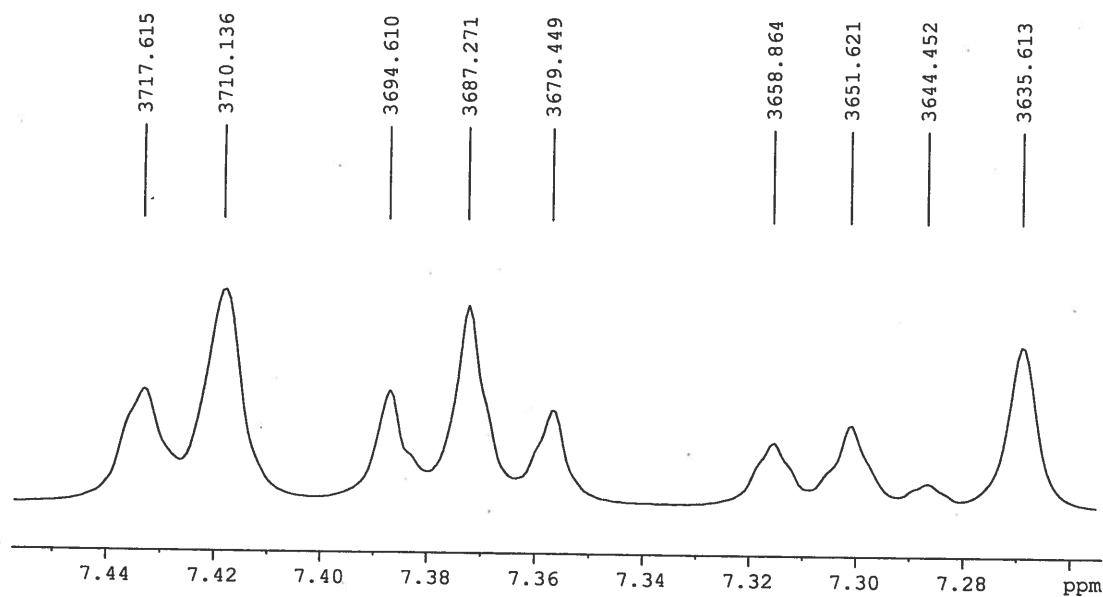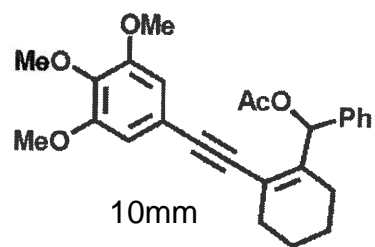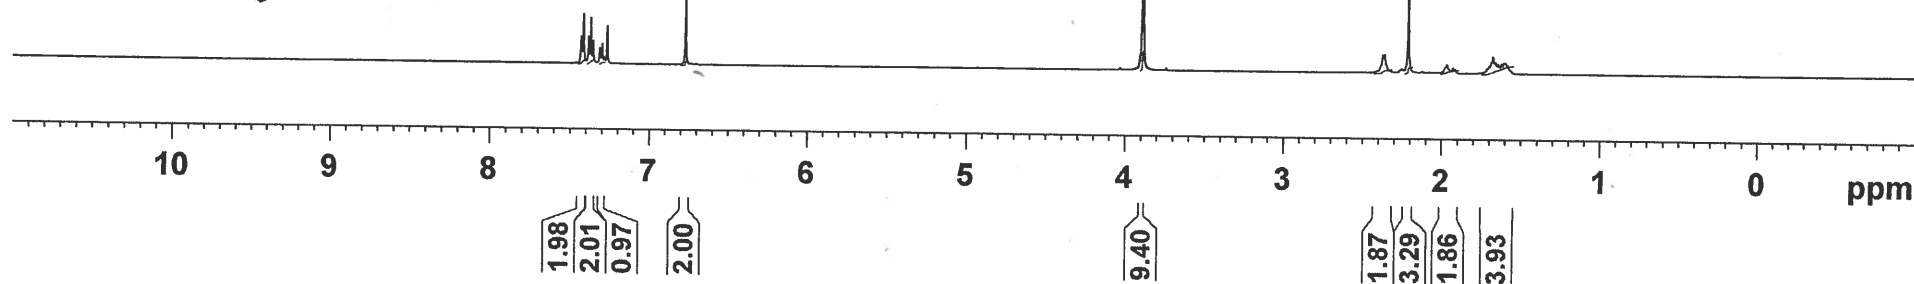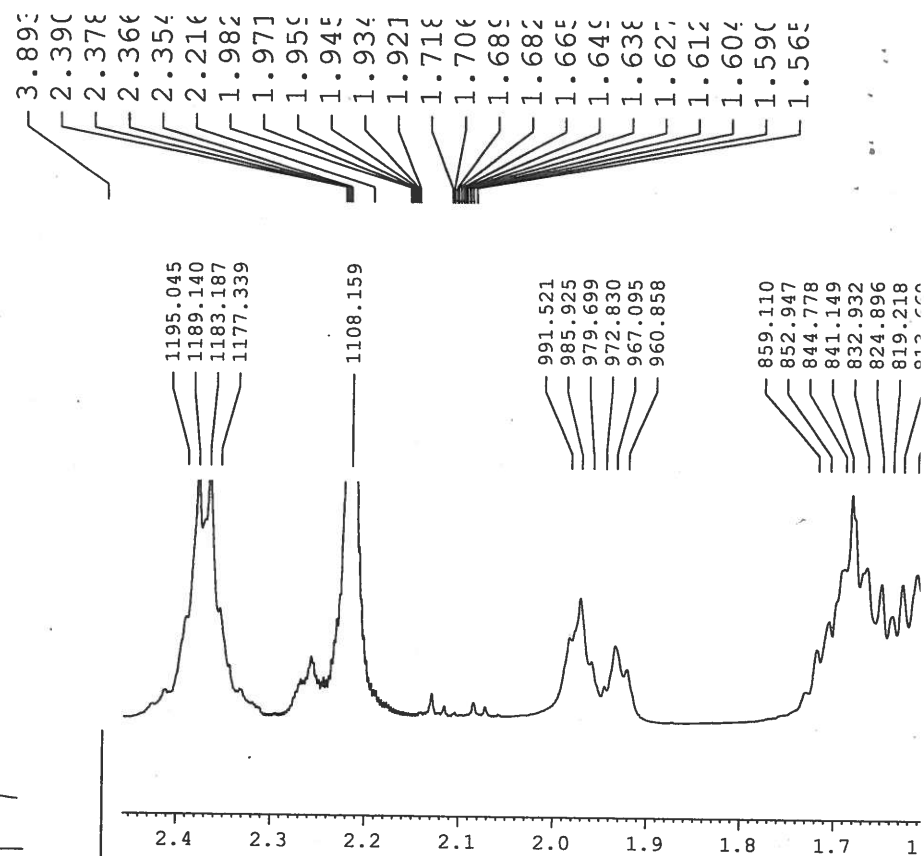

Trimethoxy-5-CC-CyclohexeneOAc-Ph <sup>13</sup>C

Ultra 300

Tuesday 10 August 2010

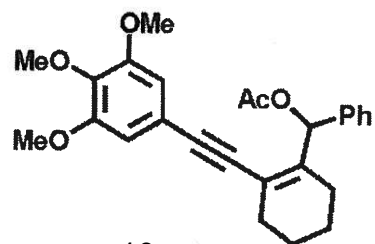

10mm

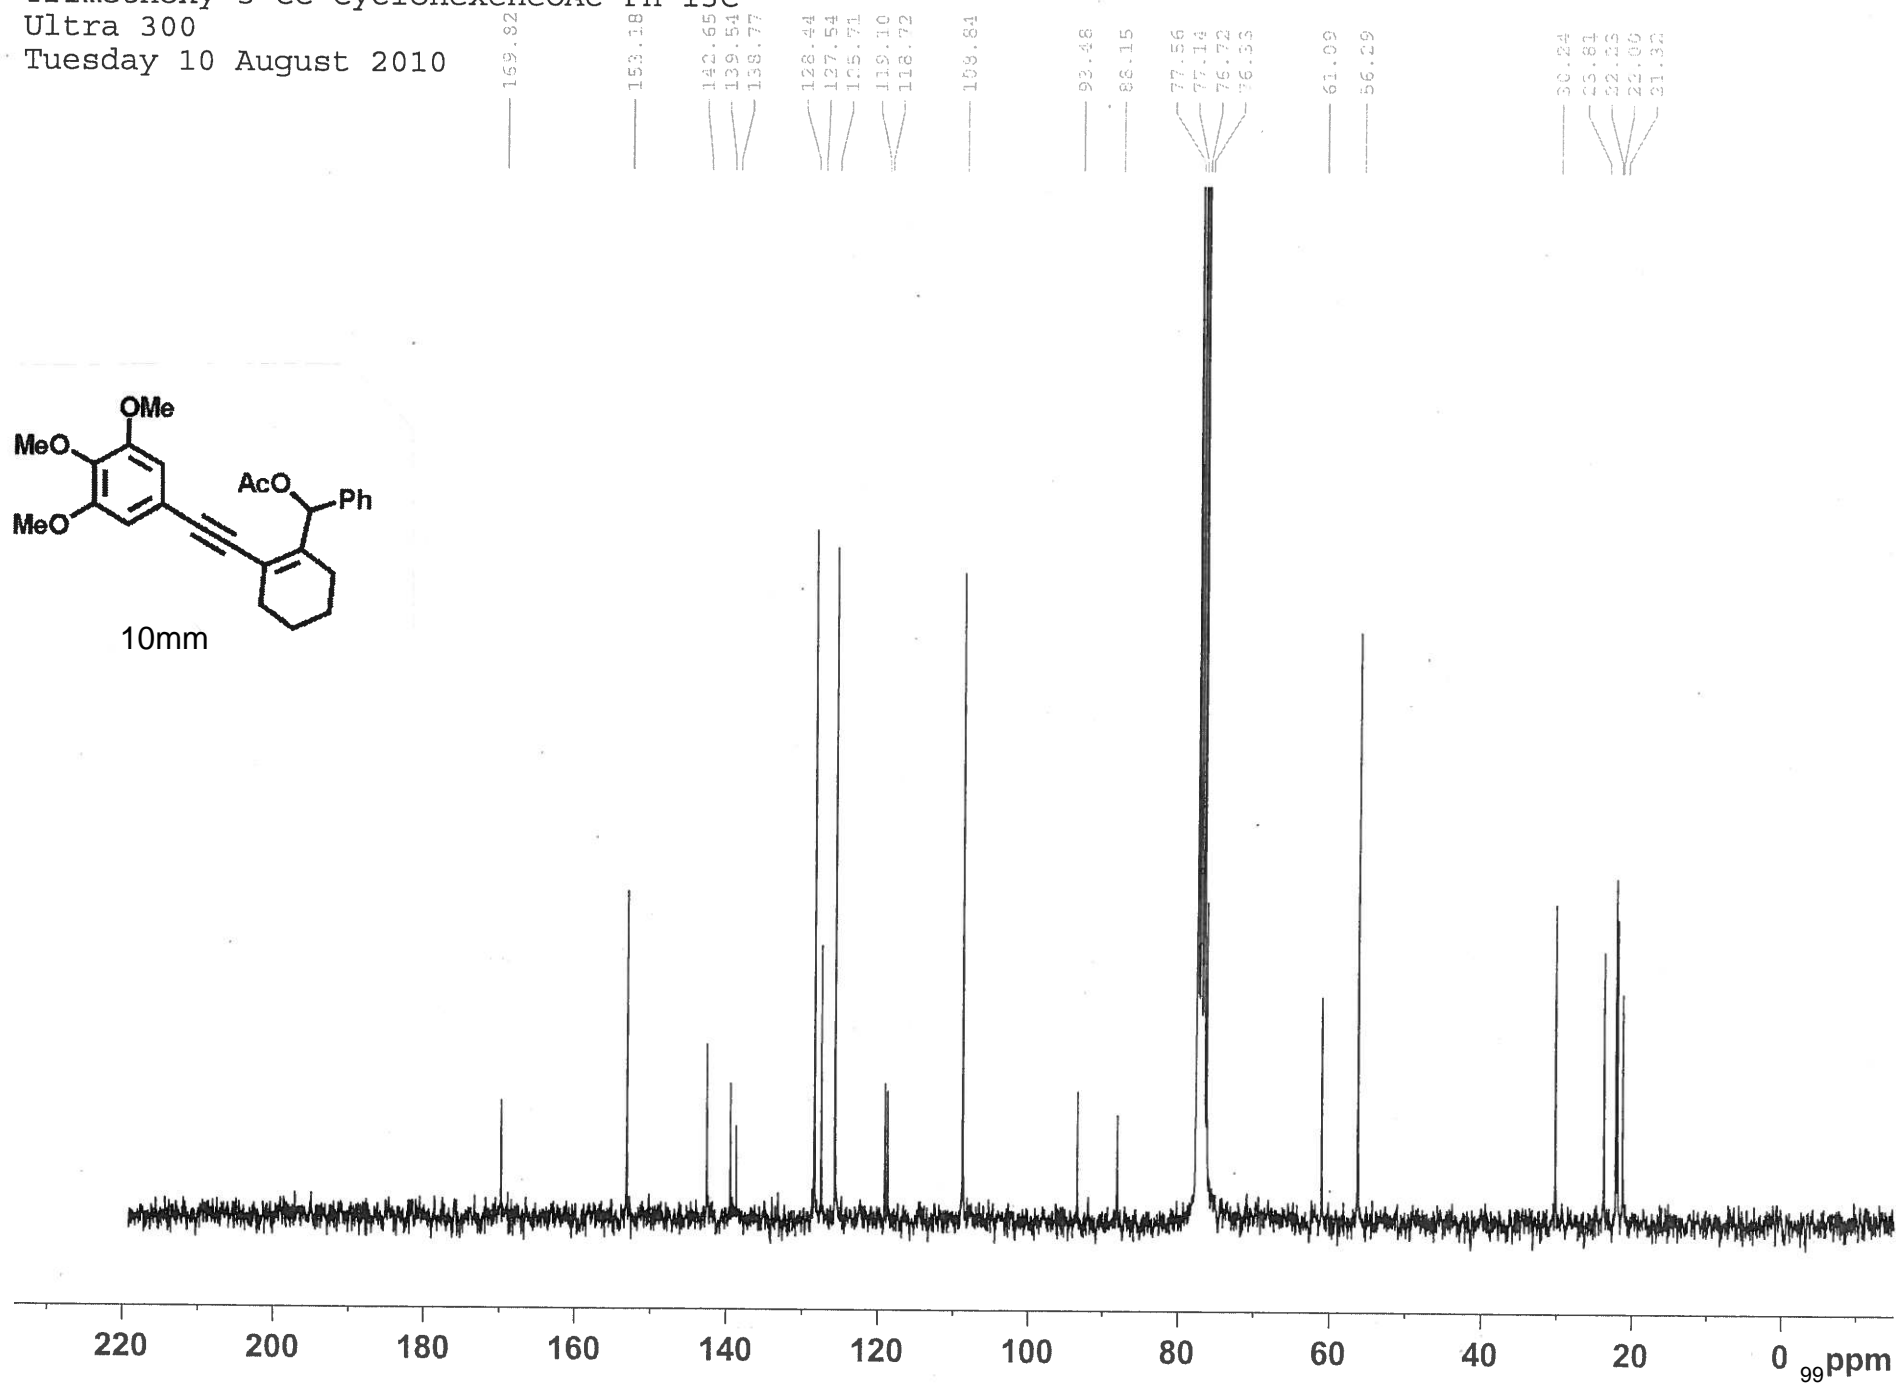

Trimethoxy-5-Cc-CyclohepteneOAc  
Experiment 2 Topspin 500  
Friday 20 May 2011

7.271

6.660

4.900

3.858

3.849

2.502

2.491

2.481

2.329

2.318

2.307

2.095

1.791

1.780

1.768

1.633

1.621

1.611

1.600

1.552

1.540

1.529

1.519

1251.482  
1246.049  
1240.568

1164.933  
1159.458  
1153.944

1047.729

895.940  
890.249  
884.222

816.549  
810.819  
805.500  
800.218  
776.001  
770.246  
764.922  
759.609

Current Data Parameters  
NAME Trimethoxy-5-Cc-CyclohepteneOAc  
EXPNO 2  
PROCNO 1

F2 - Acquisition Parameters  
Date\_ 20110520  
Time\_ 13.41  
INSTRUM spect  
PROBHD 5 mm PABBO BB/  
PULPROG zgesgp  
TD 32768  
SOLVENT C6D6  
NS 8  
DS 2  
SWH 10330.578 Hz  
FIDRES 0.315264 Hz  
AQ 1.5860696 sec  
RG 40.3  
DW 48.400 usec  
DE 6.50 usec  
TE 294.2 K  
D1 2.00000000 sec  
d12 0.00002000 sec  
D16 0.00020000 sec  
TD0 1

===== CHANNEL f1 =====  
NUC1 1H  
P1 14.80 usec  
p2 29.60 usec  
P12 2000.00 usec  
PL0 120.00 dB  
PL1 -1.40 dB  
SFO1 500.1302501 MHz  
SP1 35.19 dB  
SPNAM1 Squa100.1000  
SPOAL1 0.500  
SPOFFS1 0.00 Hz

===== GRADIENT CHANNEL =====  
GPNAM1 SINE.100  
GPNAM2 SINE.100  
GPZ1 31.00 %  
GPZ2 11.00 %  
P16 1000.00 usec

F2 - Processing parameters  
SI 32768  
SF 500.1300182 MHz  
WDW EM  
SSB 0

LB 1.00 Hz  
GB 0  
PC 1 0 1.00 ppm

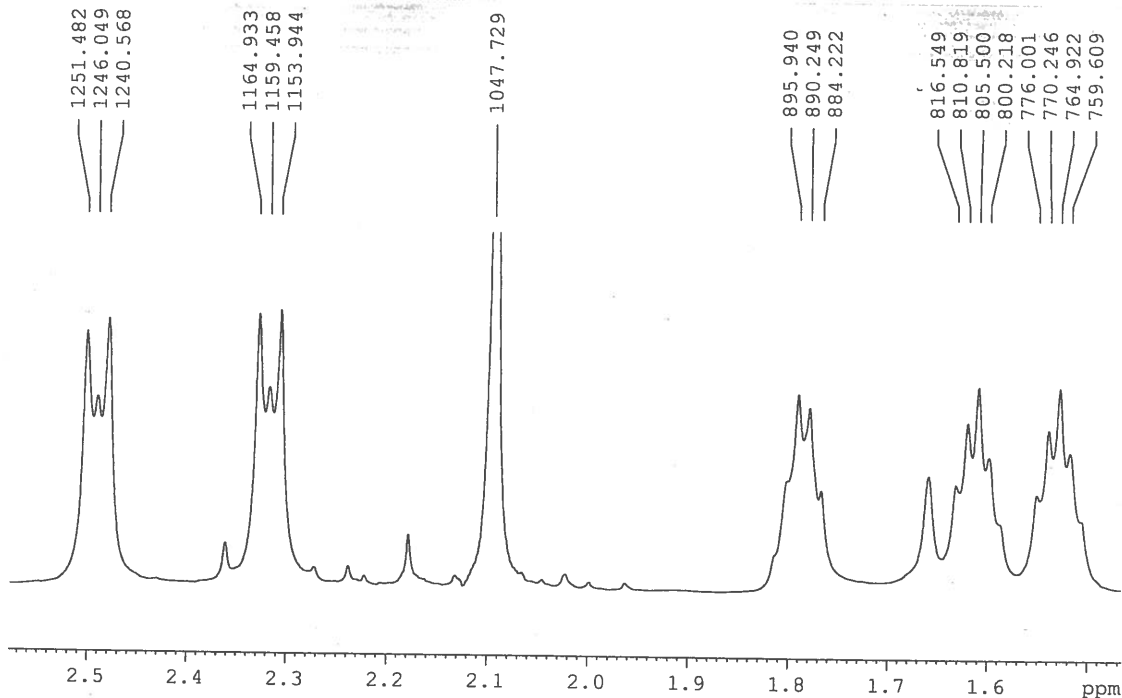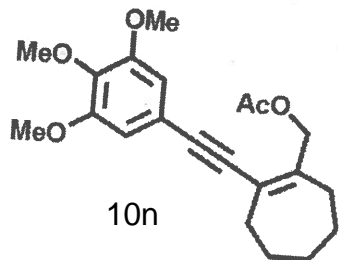



Trimethoxy-5-CC-CyclohepteneOAc 13C  
Experiment 1 Ultra Topspin 300  
Date 20 May 2011

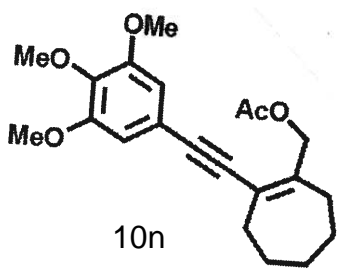

NAME Trimethoxy-5-CC-CyclohepteneOAc 13C  
EXPNO 1  
PROCNO 1  
Date\_ 20110520  
Time\_ 15.10  
INSTRUM spect  
PROBHD 5 mm PABBO BB-  
PULPROG zgpg30  
TD 16384  
SOLVENT CDCl3  
NS 1159  
DS 4  
SWH 17985.611 Hz  
FIDRES 1.097755 Hz  
AQ 0.4555252 sec  
RG 20642.5  
DW 27.800 usec  
DE 6.00 usec  
TE 300.2 K  
D1 1.00000000 sec  
D11 0.03000000 sec  
TD0 1

===== CHANNEL f1 =====  
NUC1 13C  
P1 11.25 usec  
PL1 0.00 dB  
SFO1 75.4752953 MHz

===== CHANNEL f2 =====  
CPDPRG2 waltz16  
NUC2 1H  
PCPD2 80.00 usec  
PL2 0.00 dB  
PL12 16.55 dB  
PL13 24.00 dB  
SFO2 300.1312005 MHz  
SI 8192  
SF 75.4677423 MHz  
WDW EM  
SSB 0  
LB 2.50 Hz  
GB 0  
PC 1.40

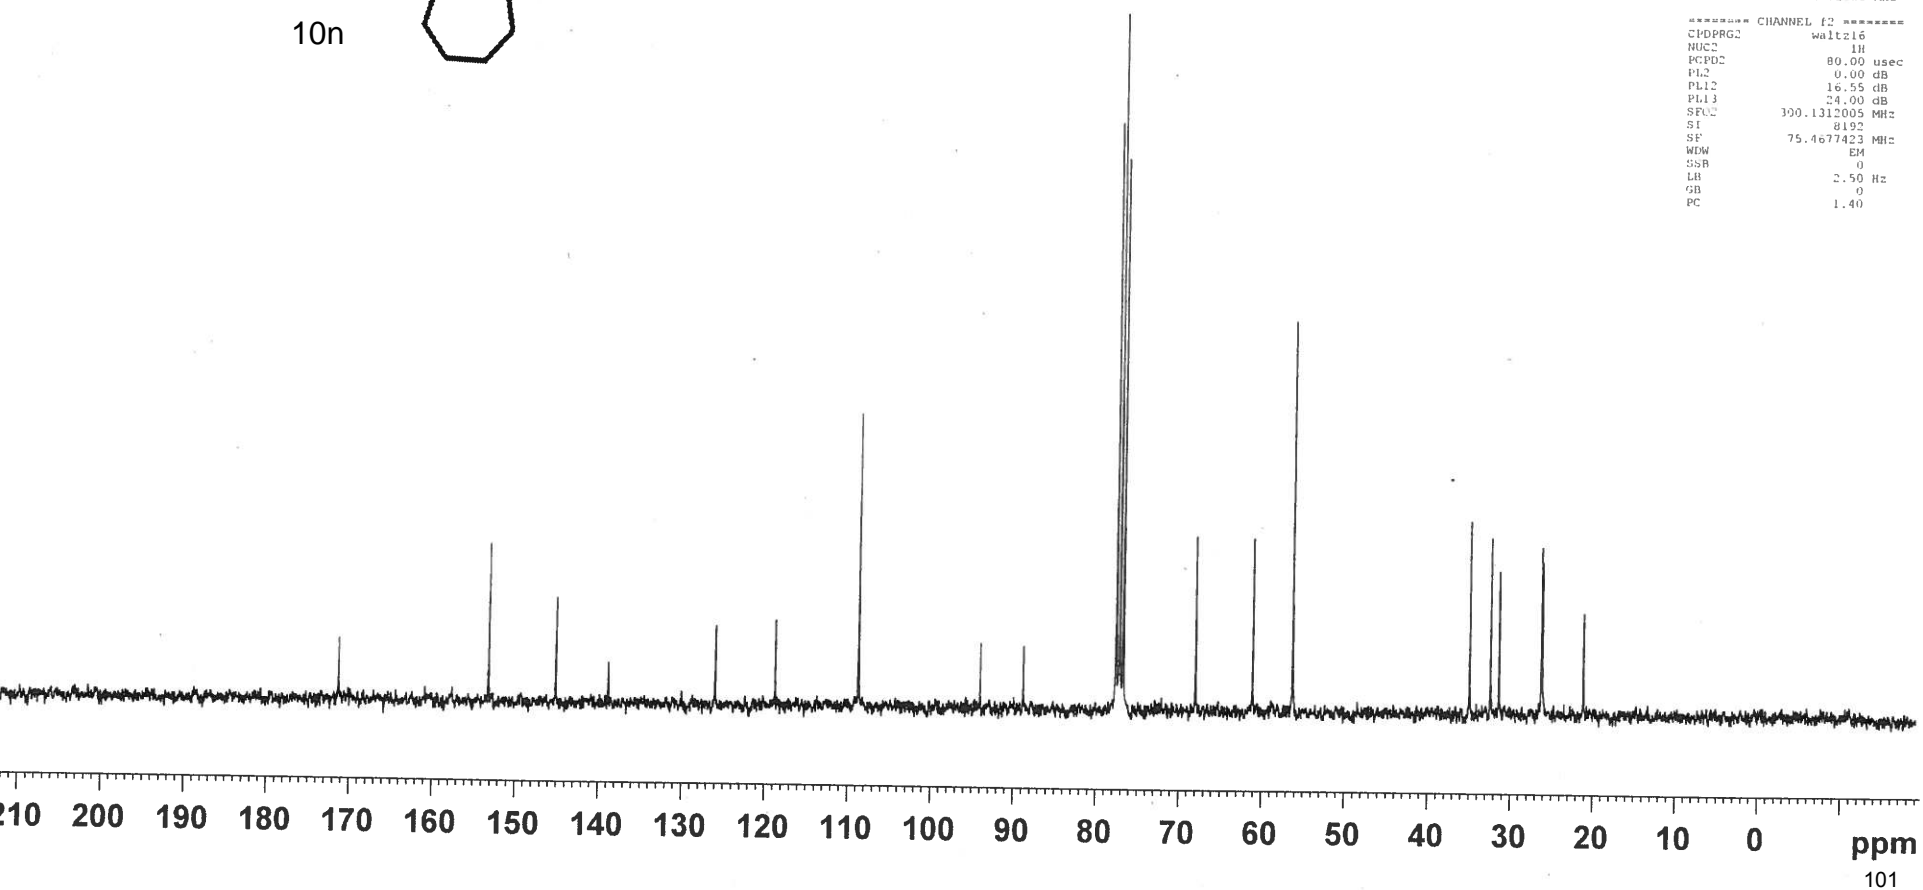

RosmarDerivative-CC-CyclohexeneOAc  
 Experiment 3 Topspin 500  
 Wednesday 08 December 2010

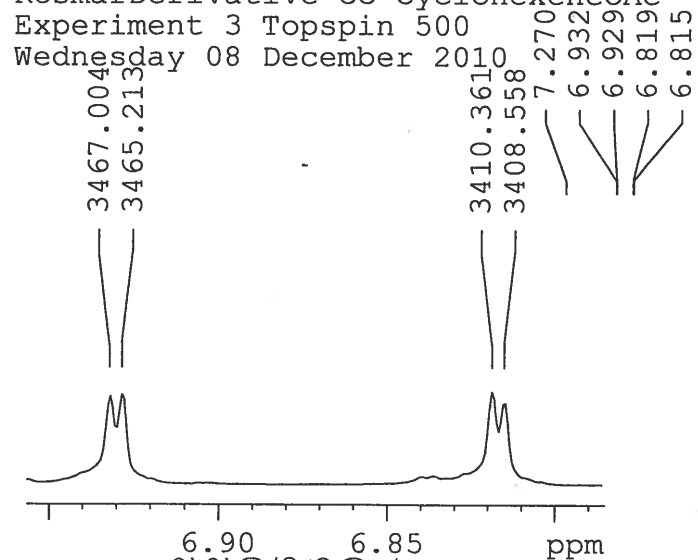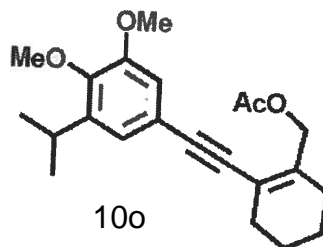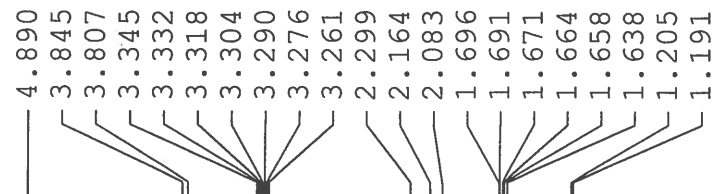

Current Data Parameters  
 NAME RosmarDerivative-CC-CyclohexeneOAc  
 EXPNO 3  
 PROCNO 1

F2 - Acquisition Parameters  
 Date\_ 20101209  
 Time\_ 2.17  
 INSTRUM spect  
 PROBHD 5 mm PABBO BB/  
 PULPROG zgpg30  
 TD 32768  
 SOLVENT H2O  
 NS 8  
 DS 2  
 SWH 10964.912 Hz  
 FIDRES 0.334623 Hz  
 AQ 1.4942708 sec  
 RG 16  
 DW 45.600 usec  
 DE 6.50 usec  
 TE 294.2 K  
 D1 2.00000000 sec  
 d12 0.00002000 sec  
 D16 0.00020000 sec  
 TD0 1

===== CHANNEL f1 =====  
 NUC1 1H  
 P1 14.80 usec  
 p2 29.60 usec  
 P12 2000.00 usec  
 PLO 120.00 dB  
 PL1 -1.40 dB  
 SFO1 500.1303001 MHz  
 SP1 35.19 dB  
 SPNAM1 Squal100.1000  
 SPOAL1 0.500  
 SPOFFS1 0.00 Hz

===== GRADIENT CHANNEL =====  
 GPNAM1 SINE.100  
 GPNAM2 SINE.100  
 GPZ1 31.00 %  
 GPZ2 11.00 %  
 P16 1000.00 usec

F2 - Processing parameters  
 SI 32768  
 SF 500.1300180 MHz  
 WDW EM  
 SSB 0  
 LB 0.10 Hz  
 GB 0  
 PC 1.00

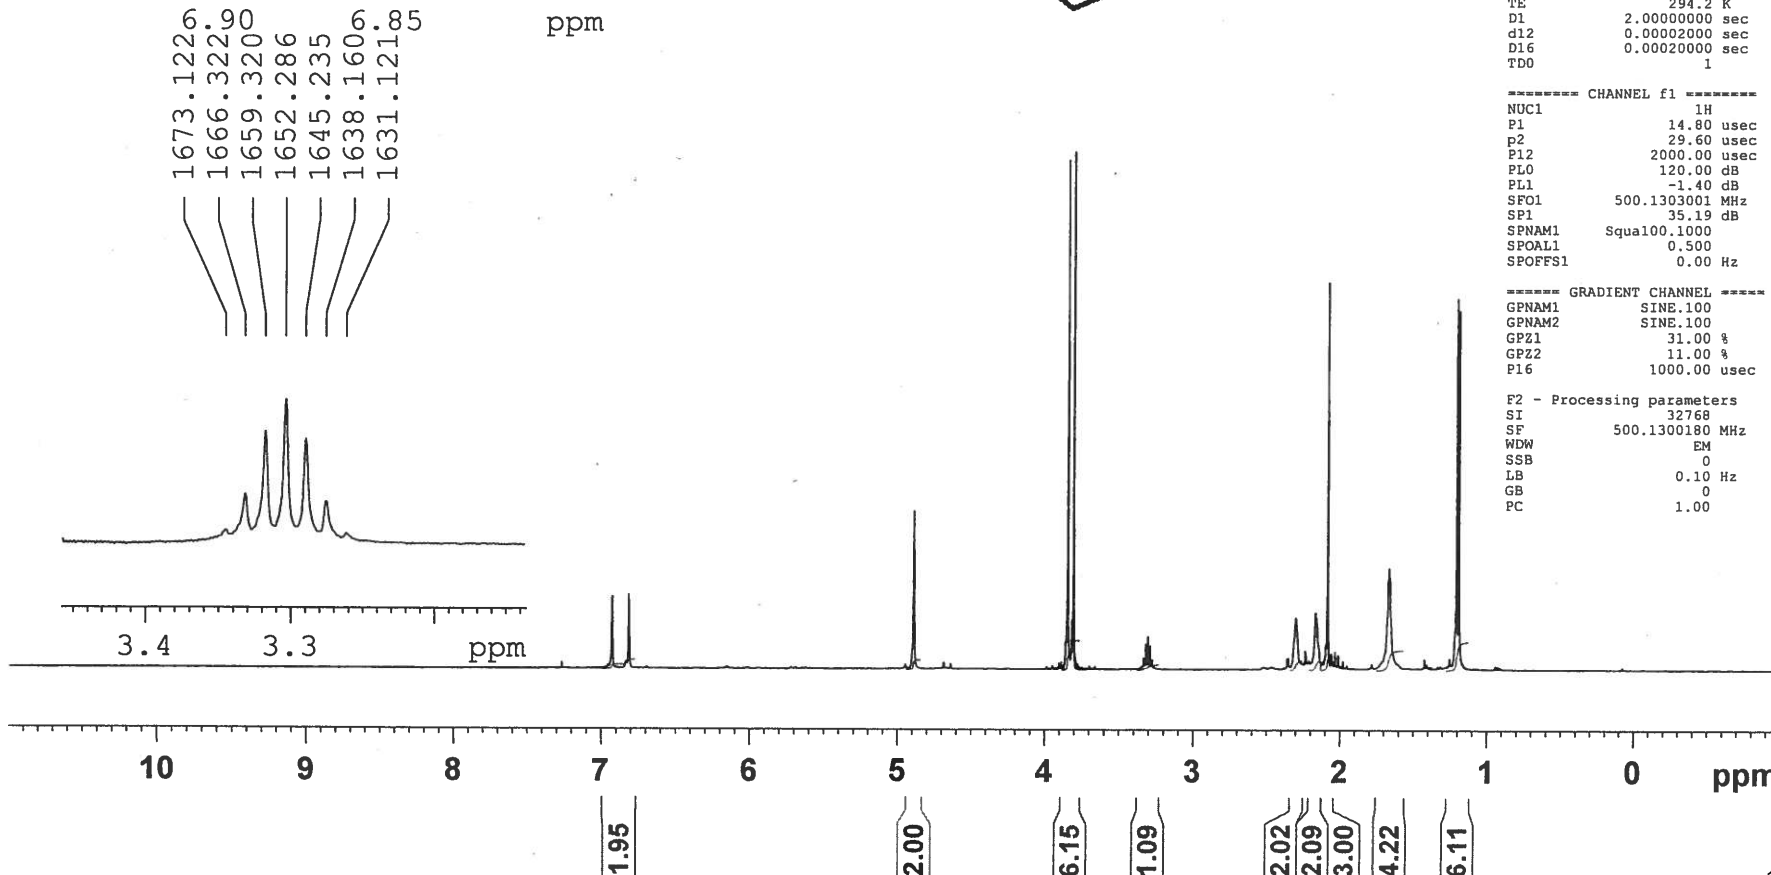

RosmarDerivative-CC-CyclohexeneOAc

Experiment 4 13C

Topspin 500

Wednesday 08 December 2010

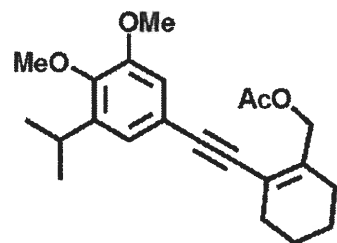

100

111.15

152.30

146.78

142.53

138.65

122.11

120.03

118.75

112.62

93.44

86.67

77.39

77.13

76.88

56.62

50.97

55.78

30.28

27.02

26.76

23.37

22.19

22.01

21.00

Current Data Parameters  
NAME RosmarDerivative-CC-Cyclohexene  
EXPNO 4  
PROCNO 1

F2 - Acquisition Parameters  
Date\_ 20101209  
Time 2.36  
INSTRUM spect  
PROBHD 5 mm PABBO DD/  
PULPROG zgpg30  
TD 16384  
SOLVENT CDCl3  
NS 11  
DS 4  
SWH 30030.029 Hz  
FIDRES 1.832888 Hz  
AQ 0.2728603 sec  
RG 1149.4  
DM 16.650 usec  
DE 6.50 usec  
TE 295.2 K  
D1 1.80000000 sec  
d11 0.03000000 sec  
DELTA 0.89999998 sec  
TDO 1

===== CHANNEL f1 =====  
NUC1 13C  
PL 9.50 usec  
PL1 -0.70 dB  
SFO1 125.7702890 MHz

===== CHANNEL f2 =====  
CPDPRG2 waltz16  
NUC2 1H  
PCPD2 70.00 usec  
PL2 -1.20 dB  
PL12 12.30 dB  
PL13 15.30 dB  
SFO2 500.1325010 MHz

F2 - Processing parameters  
SI 32768  
SF 125.7577890 MHz  
WEM EM  
SBB 0  
LB 2.00 Hz  
GB 0  
PC 1.40

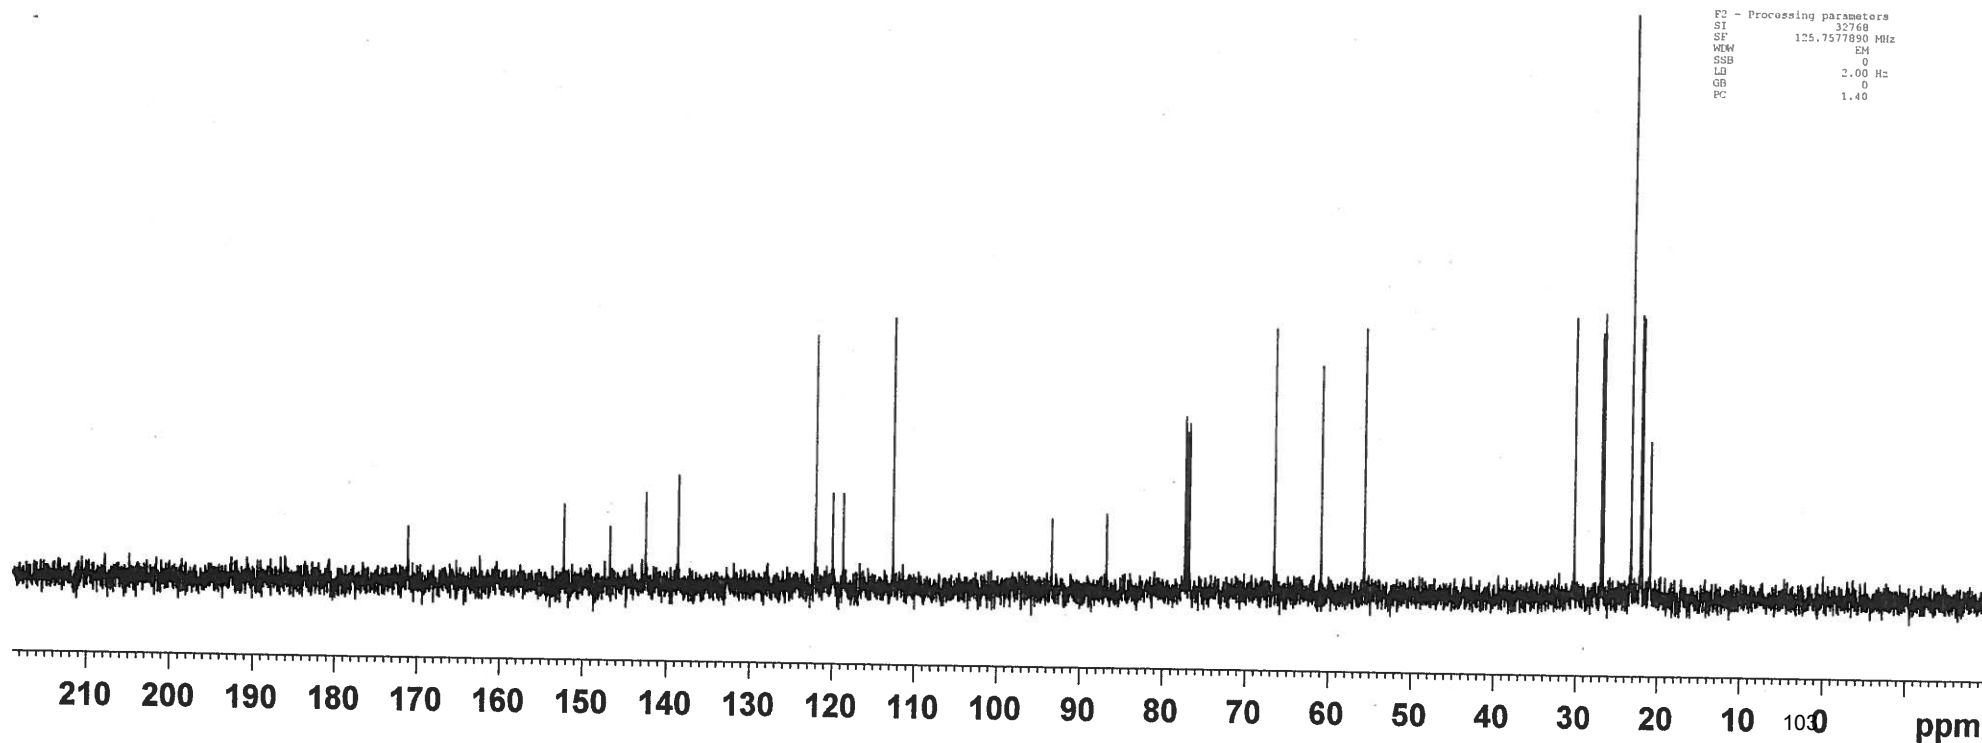

Thiophene-3-CC-CyclohexeneOAc

Experiment 3 Topspin 500

Wednesday 10 August 2010

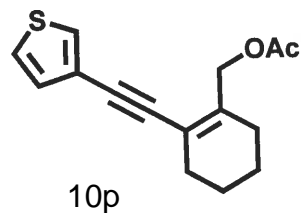

7.422  
7.422  
7.276  
7.270  
7.267  
7.261  
7.118  
7.108

4.882

2.298  
2.168  
2.097  
1.684  
1.678  
1.672  
1.651

Current Data Parameters  
NAME Thiophene-3-CC-CyclohexeneOAc  
EXPNO 3  
PROCNO 1

F2 - Acquisition Parameters  
Date\_ 20110810  
Time\_ 11.40  
INSTRUM spect  
PROBHD 5 mm PABBO BB/  
PULPROG zgpg30  
TD 32768  
SOLVENT C6D6  
NS 8  
DS 2  
SWH 10964.912 Hz  
FIDRES 0.334623 Hz  
AQ 1.4942708 sec  
RG 90.5  
DW 45.600 usec  
DE 6.50 usec  
TE 295.2 K  
D1 2.00000000 sec  
d12 0.00002000 sec  
D16 0.00020000 sec  
TD0 1

===== CHANNEL f1 =====  
NUC1 1H  
P1 14.80 usec  
p2 29.60 usec  
P12 2000.00 usec  
PL0 120.00 dB  
PL1 -1.40 dB  
SFO1 500.1305501 MHz  
SP1 35.19 dB  
SPNAM1 Squa100.1000  
SPOAL1 0.500  
SPOFFS1 0.00 Hz

===== GRADIENT CHANNEL =====  
GPNAM1 SINE.100  
GPNAM2 SINE.100  
GPZ1 31.00 %  
GPZ2 11.00 %  
P16 1000.00 usec

F2 - Processing parameters  
SI 32768  
SF 500.1300158 MHz  
WDW EM  
SSB 0  
LB 0.90 Hz  
GB 0  
PC 1.00

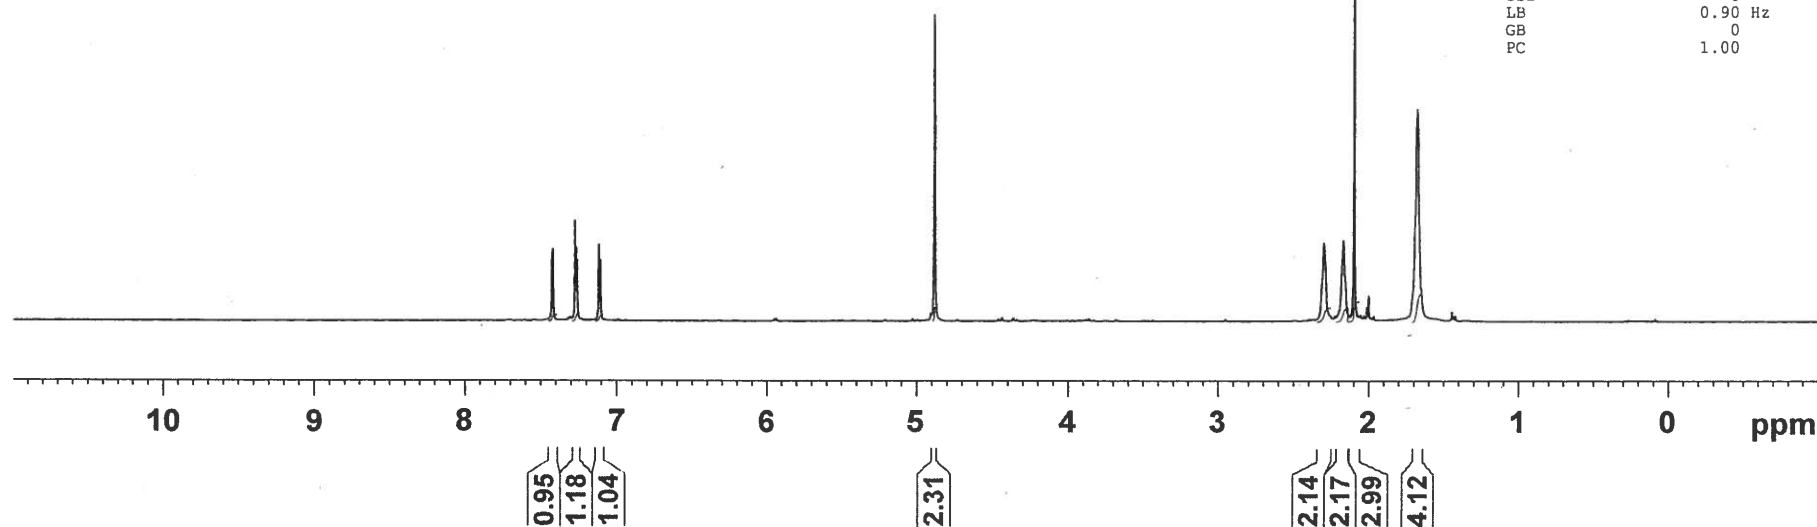

Thiophene-3-CC-CyclohexeneOAc  
Experiment 1 Topspin 300 Ultra  
Wednesday 10 August 2011

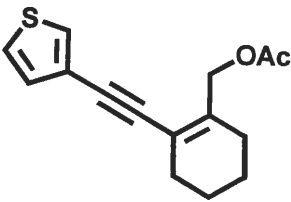

10p

NAME Thiophene-3-CC-CyclohexeneOAc  
EXPNO 1  
PROCNO 1  
Date 20110810  
Time 15.44  
INSTRUM spect  
PROBHD 5 mm PABBO BB-  
PULPROG zgpg30  
TD 16384  
SOLVENT CDC13  
NS 1290  
DS 4  
SWH 17985.611 Hz  
FIDRES 1.097755 Hz  
AQ 0.4555252 sec  
RG 20642.5  
DW 27.800 usec  
DE 6.00 usec  
TE 295.4 K  
D1 1.00000000 sec  
D11 0.03000000 sec  
TD0 1

===== CHANNEL f1 =====  
NUC1 13C  
P1 11.25 usec  
PL1 0.00 dB  
SFO1 75.4752953 MHz

===== CHANNEL f2 =====  
CPDPPG2 waltz16  
NUC2 1H  
PCPD2 80.00 usec  
PL2 0.00 dB  
PL12 16.55 dB  
PL13 24.00 dB  
SFO2 300.1312005 MHz  
SI 8192  
SF 75.4677423 MHz  
WDW EM  
SSB 0  
LB 2.50 Hz  
GB 0  
PC 1.40

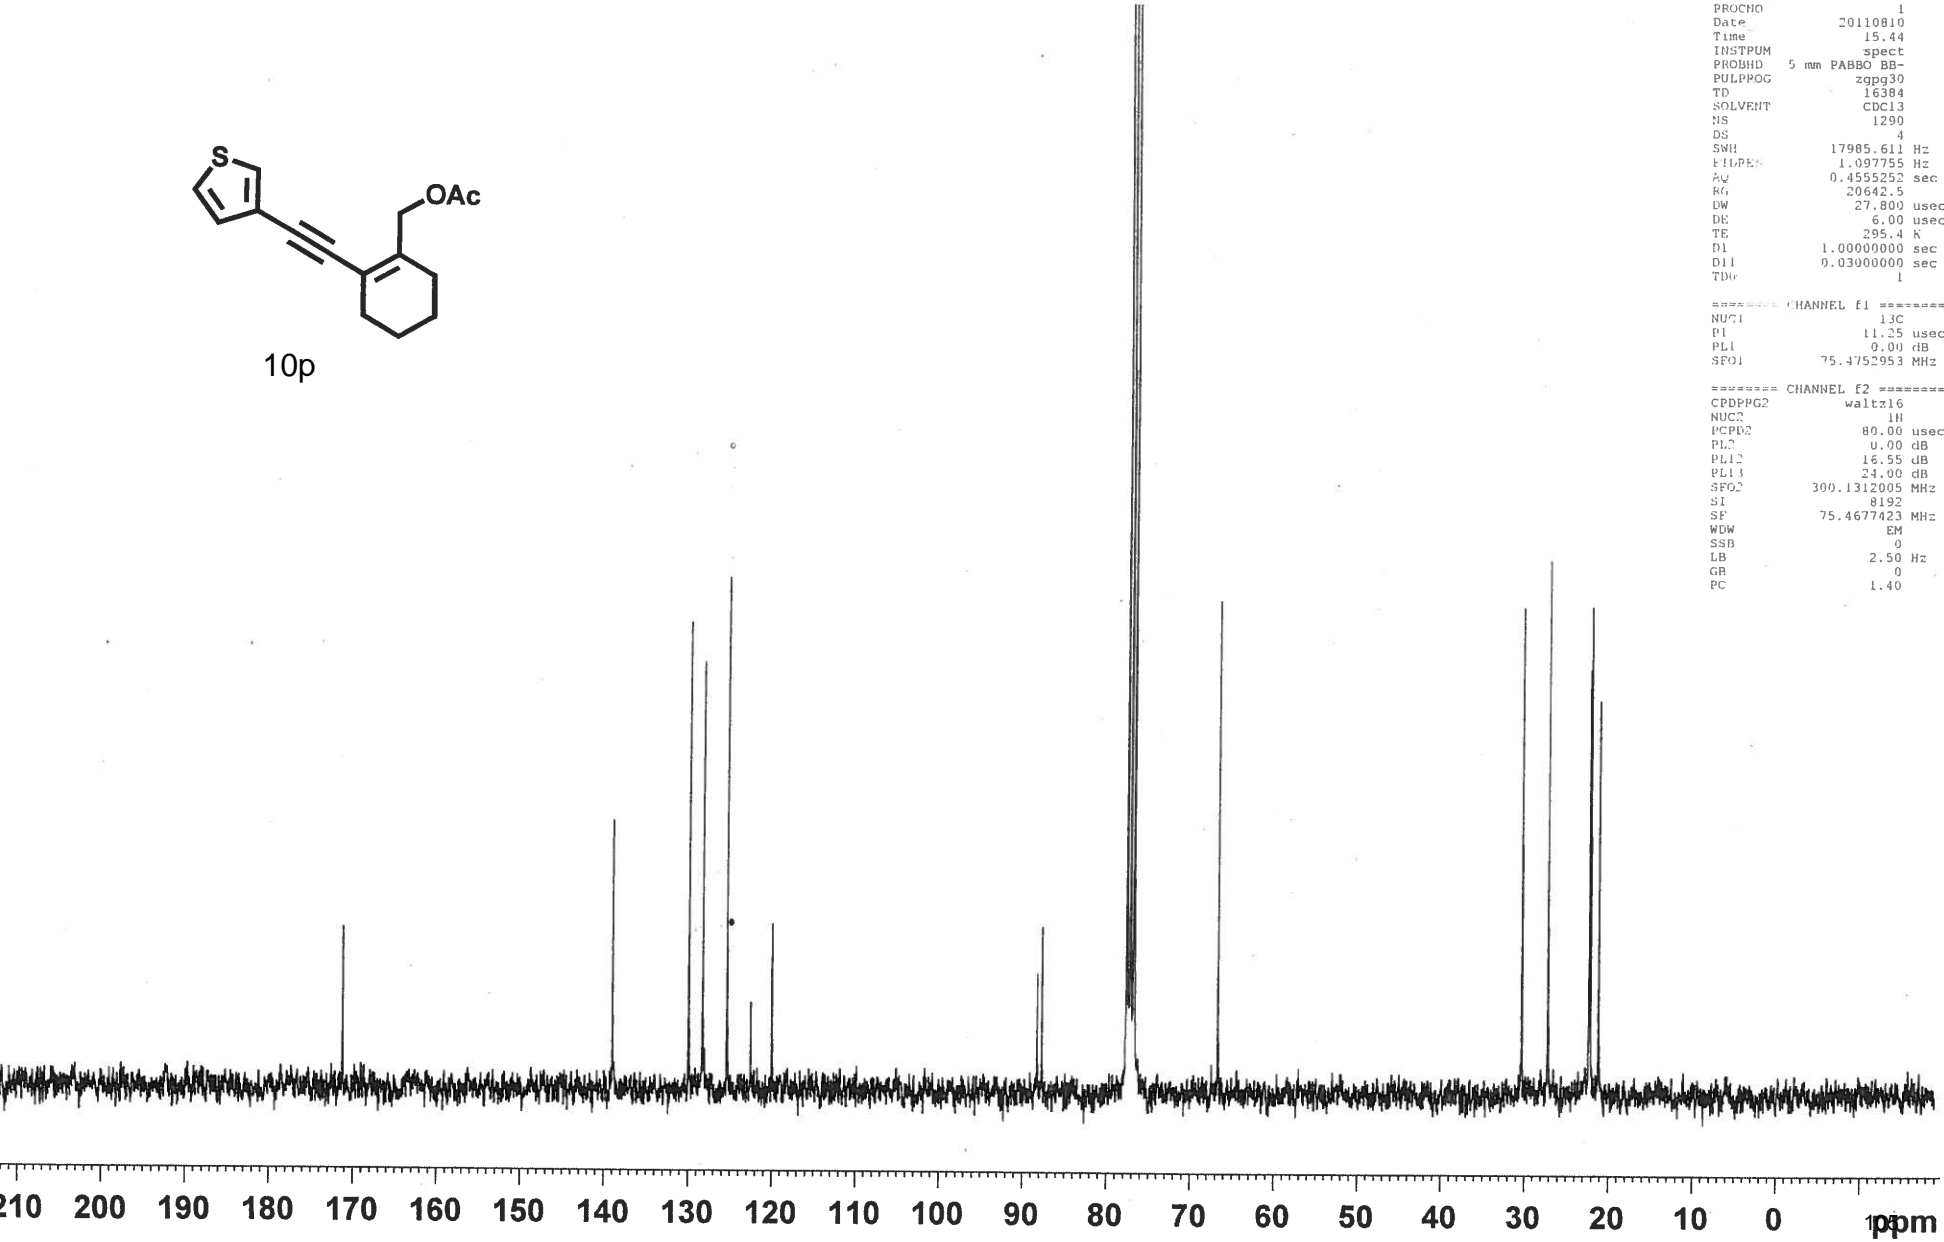

|            |                  |        |        |
|------------|------------------|--------|--------|
| Experiment | 67               | 4.460  | .453   |
| Topspin    | 5904             | .450   | .448   |
| Thursday   | 30-December-2010 | .444   | .370   |
|            |                  | .366   | .363   |
|            |                  | .7.353 | .7.349 |
|            |                  | .7.344 | .7.338 |
|            |                  | .7.330 | .7.327 |
|            |                  | .7.324 | .7.319 |
|            |                  | .7.314 | .7.307 |
|            |                  | .7.302 | .7.299 |
|            |                  | .7.269 | 4.633  |

3685.874  
3684.141  
3682.394  
3677.402  
3675.546  
3672.822  
3669.805  
3666.210  
3664.680  
3663.156  
3660.371  
3657.763  
3654.566  
3651.926  
3650.480

| Year | Total Population (millions) | White Population (millions) | Nonwhite Population (millions) |
|------|-----------------------------|-----------------------------|--------------------------------|
| 1980 | 2.057                       | 1.805                       | 0.252                          |
| 1985 | 2.041                       | 1.790                       | 0.251                          |
| 1990 | 2.026                       | 1.774                       | 0.252                          |
| 1995 | 2.010                       | 1.758                       | 0.252                          |
| 2000 | 2.005                       | 1.742                       | 0.263                          |
| 2005 | 2.000                       | 1.726                       | 0.274                          |
| 2010 | 2.805                       | 2.500                       | 0.305                          |

```

Current Data Parameters
NAME          Phenyl-CC-CyclopenteneOAc Co2 (CO) 5
EXPNO         5
PROCNO        1

F2 - Acquisition Parameters
*Date_        20101230
Time          15.25
INSTRUM       spect
PROBHD        5 mm PABBO BB/
PULPROG       zgpg3p
TD            32768
SOLVENT       H2O
NS            8
DS            2
SWH           10964.912 Hz
FIDRES        0.334623 Hz
AQ            1.4942708 sec
RG            128
DW            45.600 usec
DE            6.50 usec
TE            293.2 K
D1            2.00000000 sec
d12           0.00002000 sec
D16           0.00020000 sec
TD0           1

```

```
===== CHANNEL f1 =====
NUC1                1H
P1                  14.80 usec
p2                  29.60 usec
P12                 2000.00 usec
PL0                 120.00 dB
PL1                 -1.40 dB
SFO1                 500.1306502 MHz
SP1                  35.19 dB
SPNAM1              Squa100.1000
SPOAL1               0.500
SPOFFS1             0.00 Hz
```

```
GRADIENT CHANNEL
GPNAME1      SINE.100
GPNAME2      SINE.100
GPZ1         31.00  s
GPZ2         11.00  s
P16          1000.00 usec
```

```
F2 - Processing parameters
SI              32768
SF              500.1300191 MHz
WDW              EM
SSB              0
LB              0.20 Hz
GB              0
PC              1.00
```

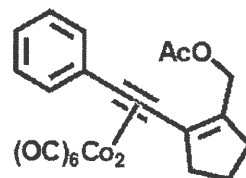

1a

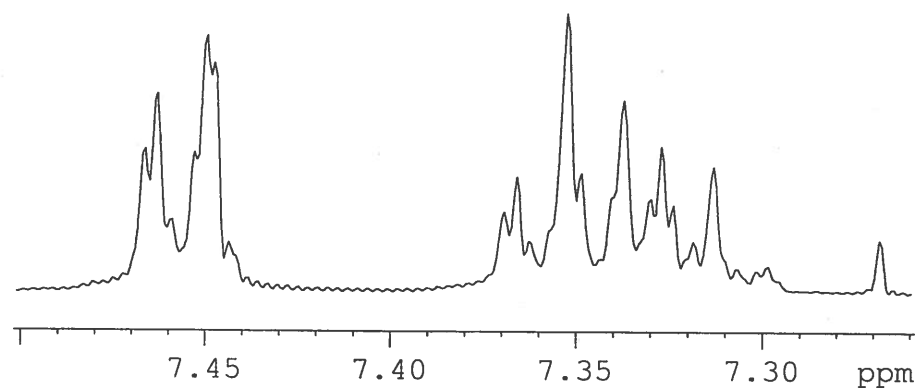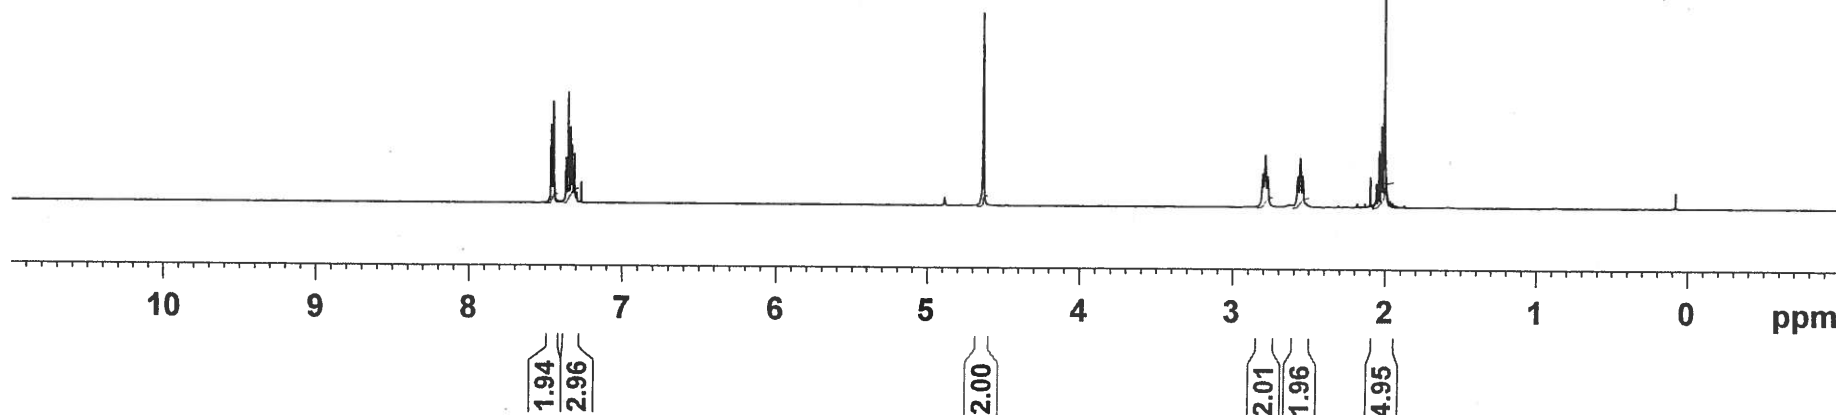

Phenyl-CC-Cyclopentene methyl acetate Co<sub>2</sub>(CO)<sub>6</sub> 13C  
 Experiment 3 Ultra 300  
 Thursday 06 January 2011

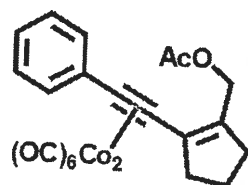

1a

Current Data Parameters  
 NAME Phenyl-CC-Cyclopentene methyl acetate Co2  
 EXPNO 3  
 PROCNO 1

P2 - Acquisition Parameters  
 Date\_ 20110106  
 Time 10.46  
 INSTRUM av300  
 PROBRD 5 mm BBO BB-1H  
 PULPROG zgpg30  
 TD 16384  
 SOLVENT C6D6  
 NS 3697  
 DS 4  
 SWH 17985.611 Hz  
 FIDRES 1.097755 Hz  
 AQ 0.4553252 sec  
 RG 20642.5  
 DM 27.800 usec  
 DE 6.00 usec  
 TE 300.0 K  
 D1 1.00000000 sec  
 d11 0.01000000 sec  
 d12 0.00020000 sec

\*\*\*\*\* CHANNEL f1 \*\*\*\*\*  
 NUC1 13C  
 P1 11.25 usec  
 PL1 0.00 dB  
 SFO1 75.4752950 MHz

\*\*\*\*\* CHANNEL f2 \*\*\*\*\*  
 CPDPRG2 waltz16  
 NUC2 1H  
 PCPD2 80.00 usec  
 PL2 0.00 dB  
 PL12 16.55 dB  
 PL13 24.00 dB  
 SFO2 300.1312005 MHz

F2 - Processing parameters  
 SI 8192  
 SF 75.4677423 MHz  
 WDW EM  
 SSB 0  
 LB 2.50 Hz  
 GB 0  
 PC 1.40

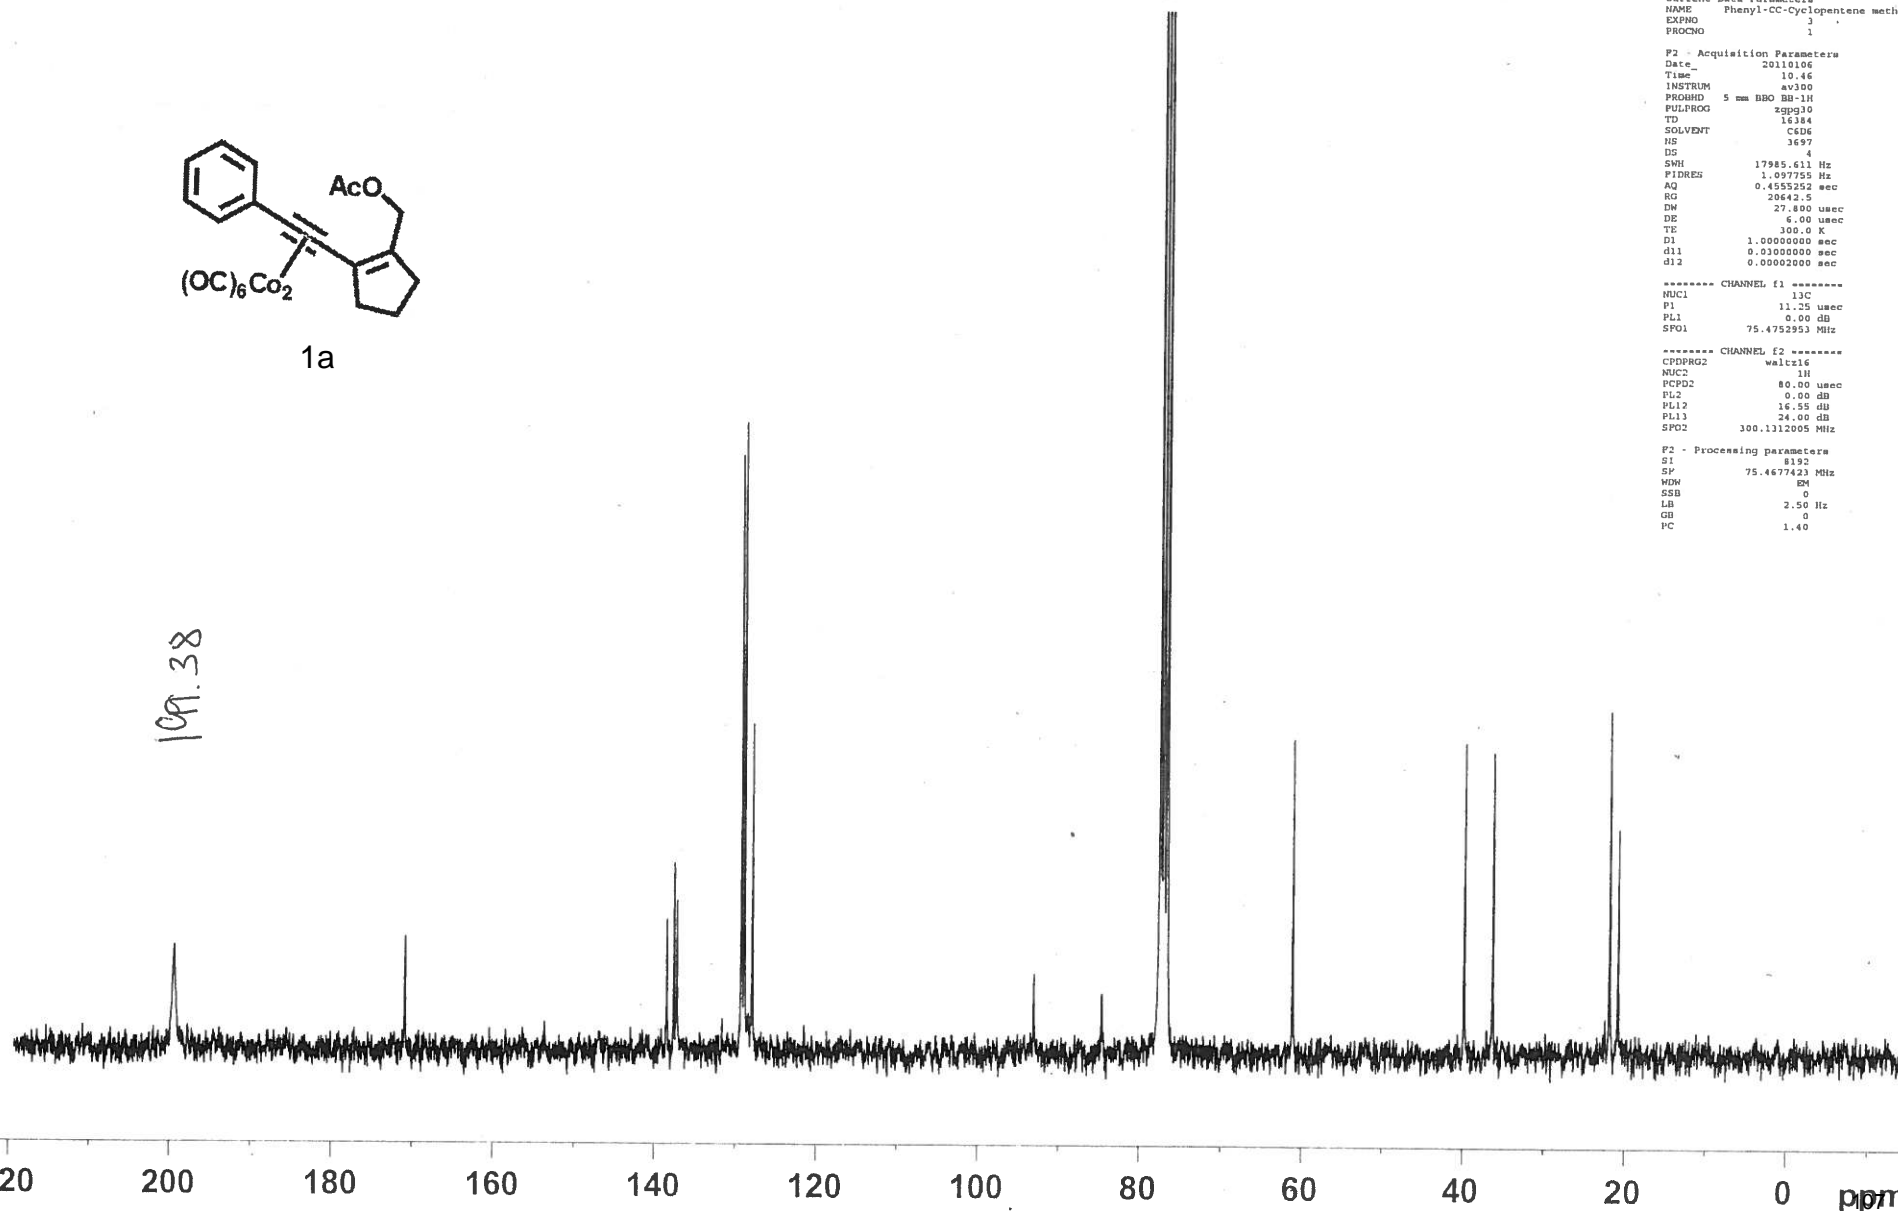

Phenyl-CC-Cyclohexeneacetate Co<sub>2</sub>(CO)<sub>6</sub>  
 500 Topsin  
 Experiment 2  
 Wednesday 05 May 2010

7.415  
 7.401  
 7.359  
 7.346  
 7.330  
 7.317  
 7.303  
 7.270

3708.412  
 3701.330

3680.561  
 3673.692  
 3666.069  
 3659.493  
 3652.470

3635.795

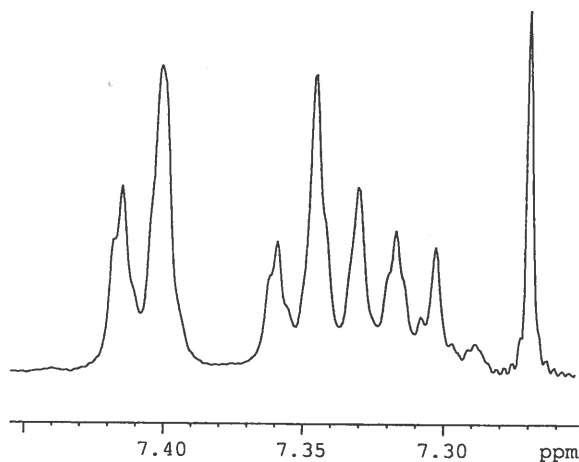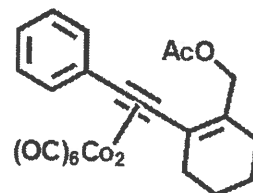

4.529

2.398  
 2.385  
 2.147  
 2.135  
 1.954  
 1.802  
 1.790  
 1.780  
 1.768  
 1.759  
 1.754  
 1.736  
 1.725

Current Data Parameters  
 NAME Phenyl-CC-Cyclohexeneacetate Co<sub>2</sub>(CO)<sub>6</sub>  
 EXPNO 2  
 PROCNO 1

F2 - Acquisition Parameters  
 Date 20100505  
 Time 19.02  
 INSTRUM spect  
 PROBHD 5 mm PABBO BB/  
 PULPROG zgpg30  
 TD 32768  
 SOLVENT H<sub>2</sub>O  
 NS 16  
 DS 2  
 SWH 10964.912 Hz  
 FIDRES 0.334623 Hz  
 AQ 1.4942708 sec  
 RG 574.7  
 DW 45.600 usec  
 DE 6.50 usec  
 TE 295.2 K  
 D1 2.00000000 sec  
 d12 0.00020000 sec  
 D16 0.00020000 sec  
 TDO 1

===== CHANNEL f1 =====  
 NUC1 1H  
 P1 14.80 usec  
 P2 29.60 usec  
 P12 2000.00 usec  
 PL0 120.00 dB  
 PL1 -1.40 dB  
 SFO1 500.1306502 MHz  
 SP1 35.19 dB  
 SPNAM1 Squa100.1000  
 SPOAL1 0.500  
 SPOFFS1 0.00 Hz

===== GRADIENT CHANNEL =====  
 GPNAM1 SINE.100  
 GPNAM2 SINE.100  
 GPZ1 31.00 %  
 GPZ2 11.00 %  
 P16 1000.00 usec

F2 - Processing parameters  
 SI 32768  
 SF 500.1300187 MHz  
 WDW EM  
 SSB 0  
 LB -0.10 Hz  
 GB 0  
 PC 1.00

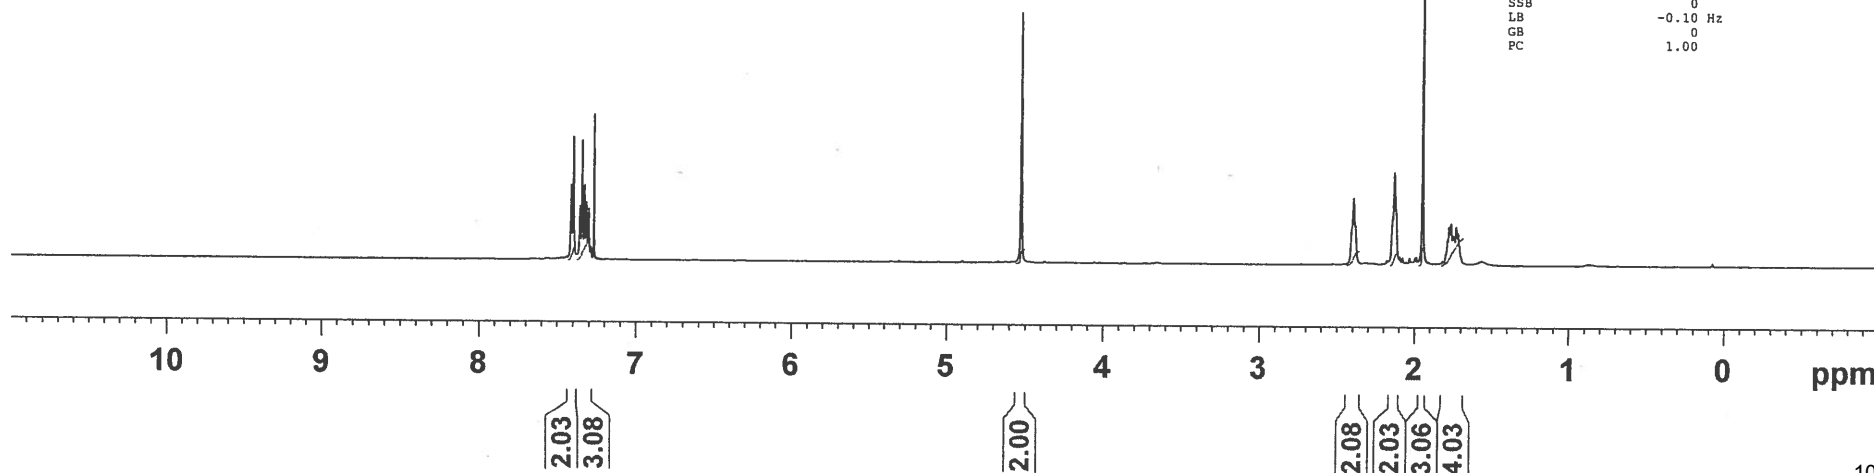



Phenyl-CC-Cyclohexeneacetate Co2(CO)6

300 Ultra

Experiment 1

Thursday 06 May 2010

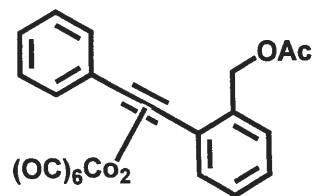

1b

199.62

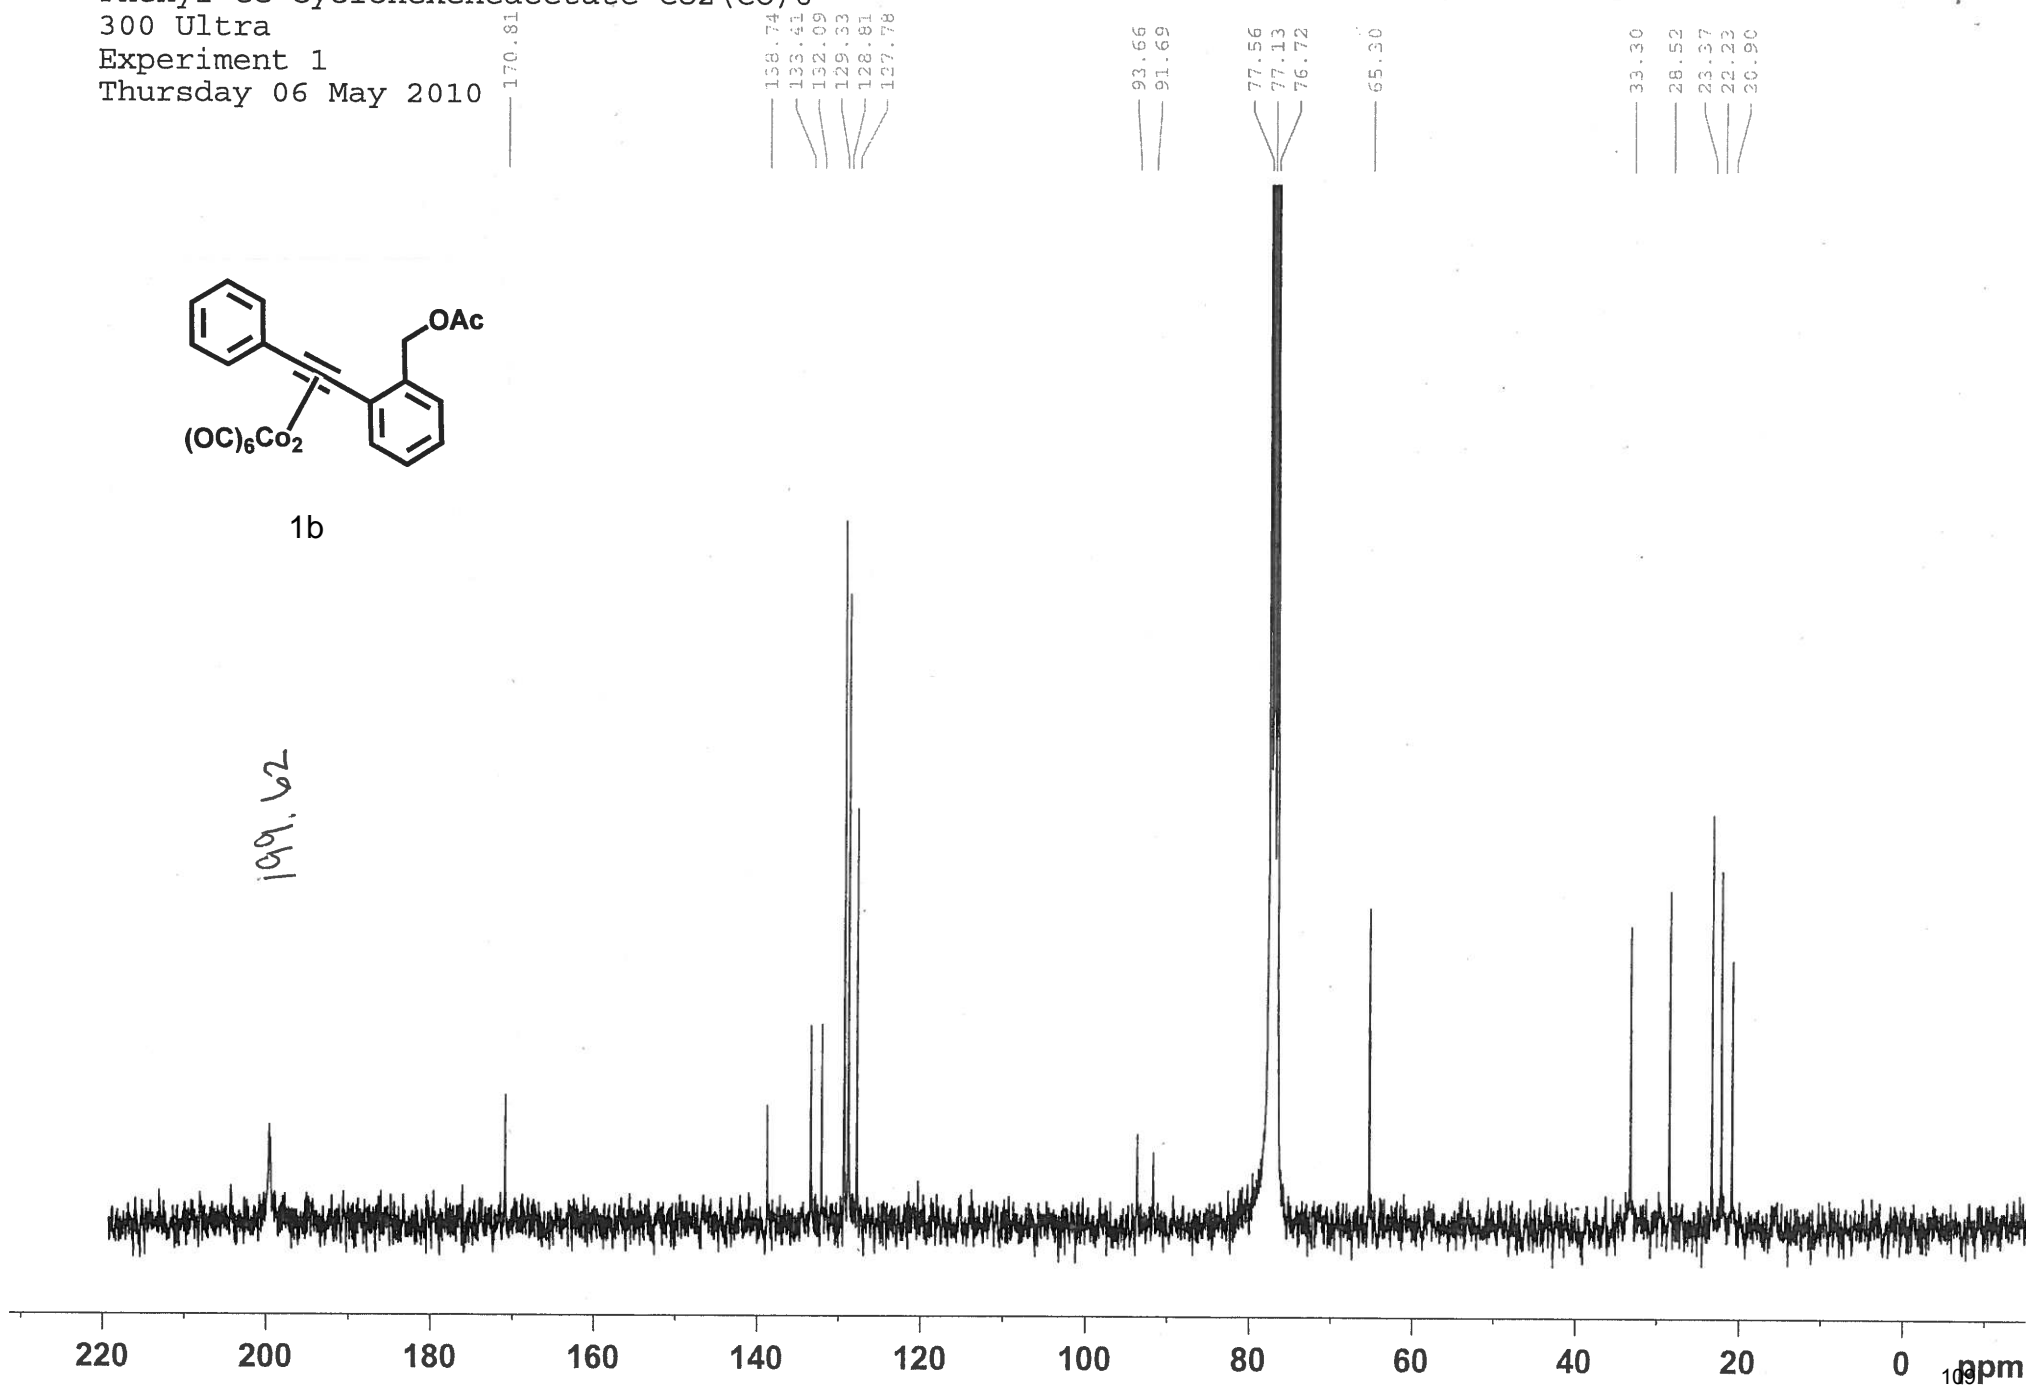

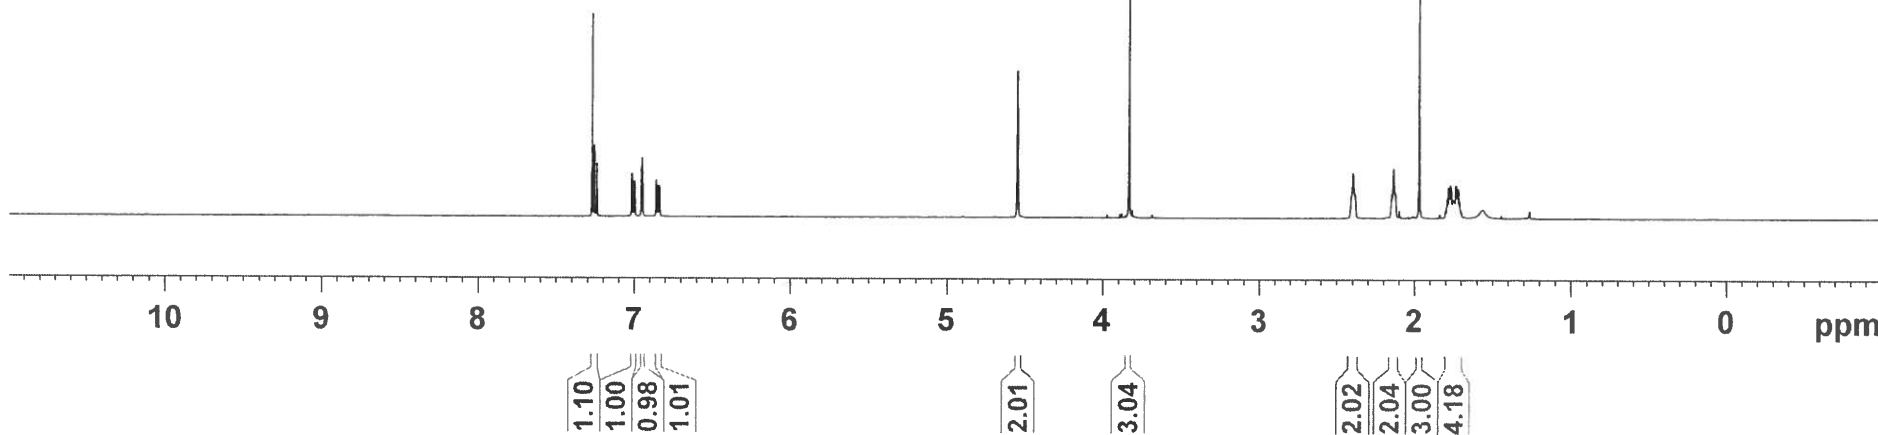

Anisole-3-CyclohexeneOAc Co<sub>2</sub>(CO)<sub>6</sub> <sup>13</sup>C  
 Ultra 300 Experiment 2  
 16 July 2009

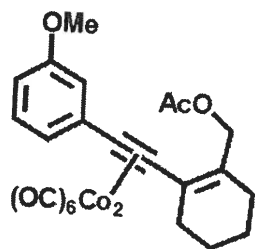

1c

- 199.61

— 170.86

— 159.64

— 140.20

— 133.51

— 132.03

— 129.79

— 121.96

— 115.16

— 113.97

- 93.54  
 — 91.67

77.56  
 77.13  
 76.72

— 65.26

— 55.51

— 35.29

— 28.52

— 23.37

— 22.23

— 20.80

220 200 180 160 140 120 100 80 60 40 20 0 ppm

Dimethoxy-1,2-Cyclohexeneacetate-4 Co<sub>2</sub>(CO)<sub>6</sub>  
 Experiment 1 (i - experiment 2)  
 500 Topsis  
 Monday 17 May 2010

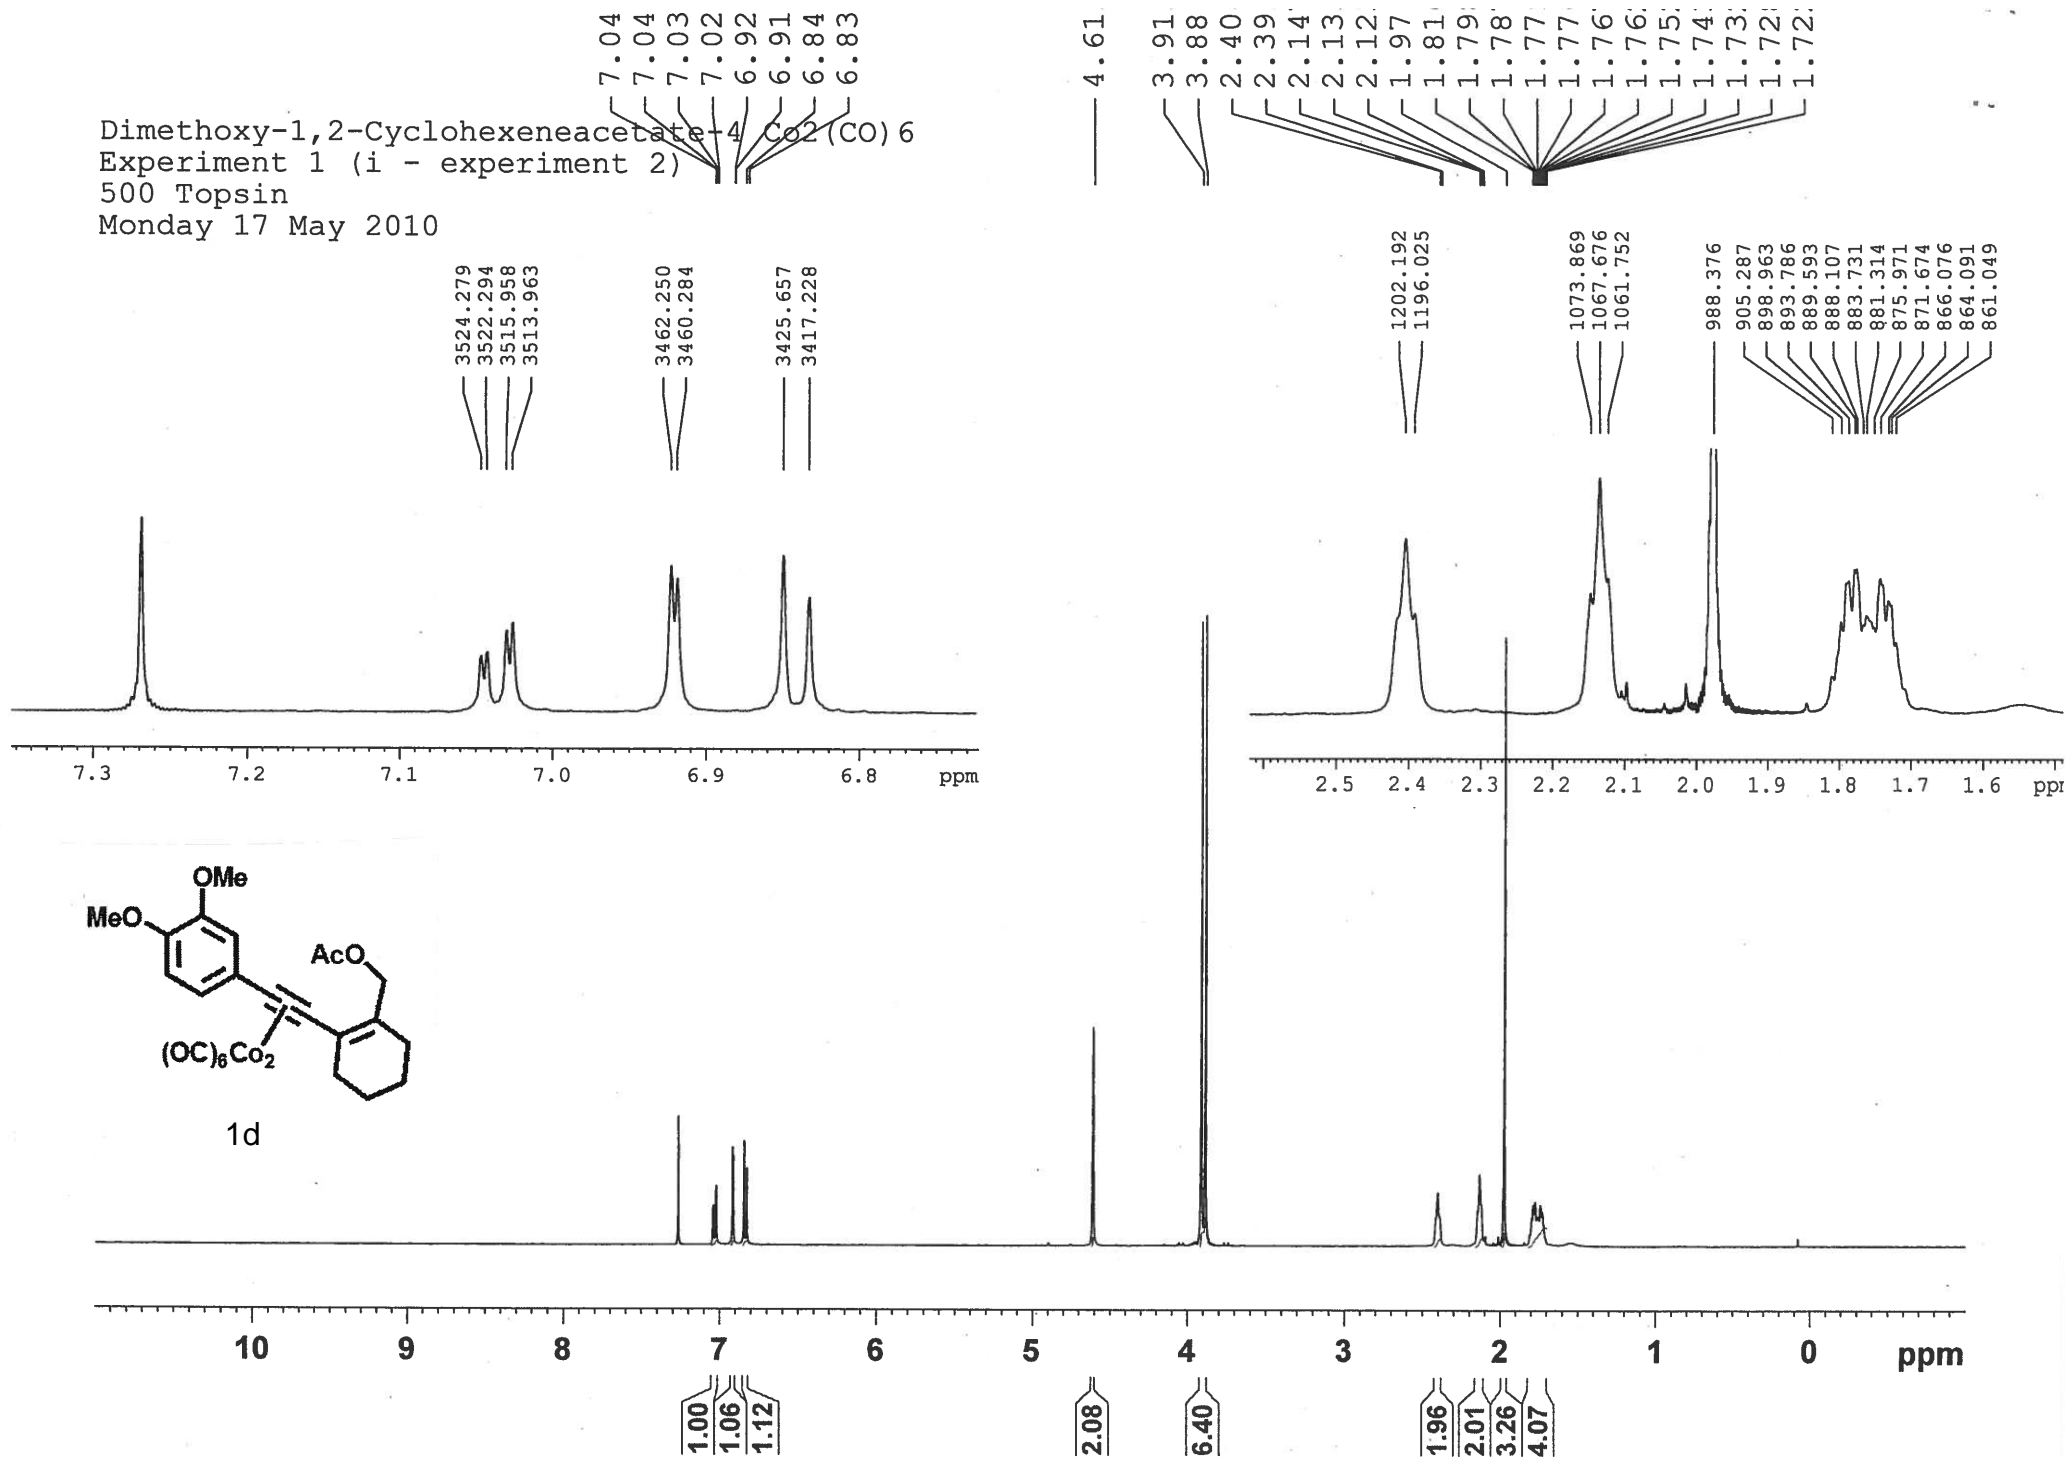

Dimethoxy-1,2-Cyclohexeneacetate-2 Co<sub>2</sub>(CO)<sub>6</sub>  
 Saturday 20 November 2010  
 300

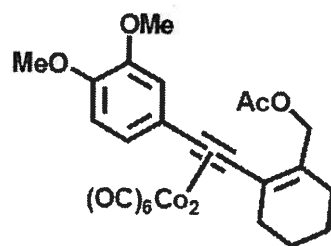

1d

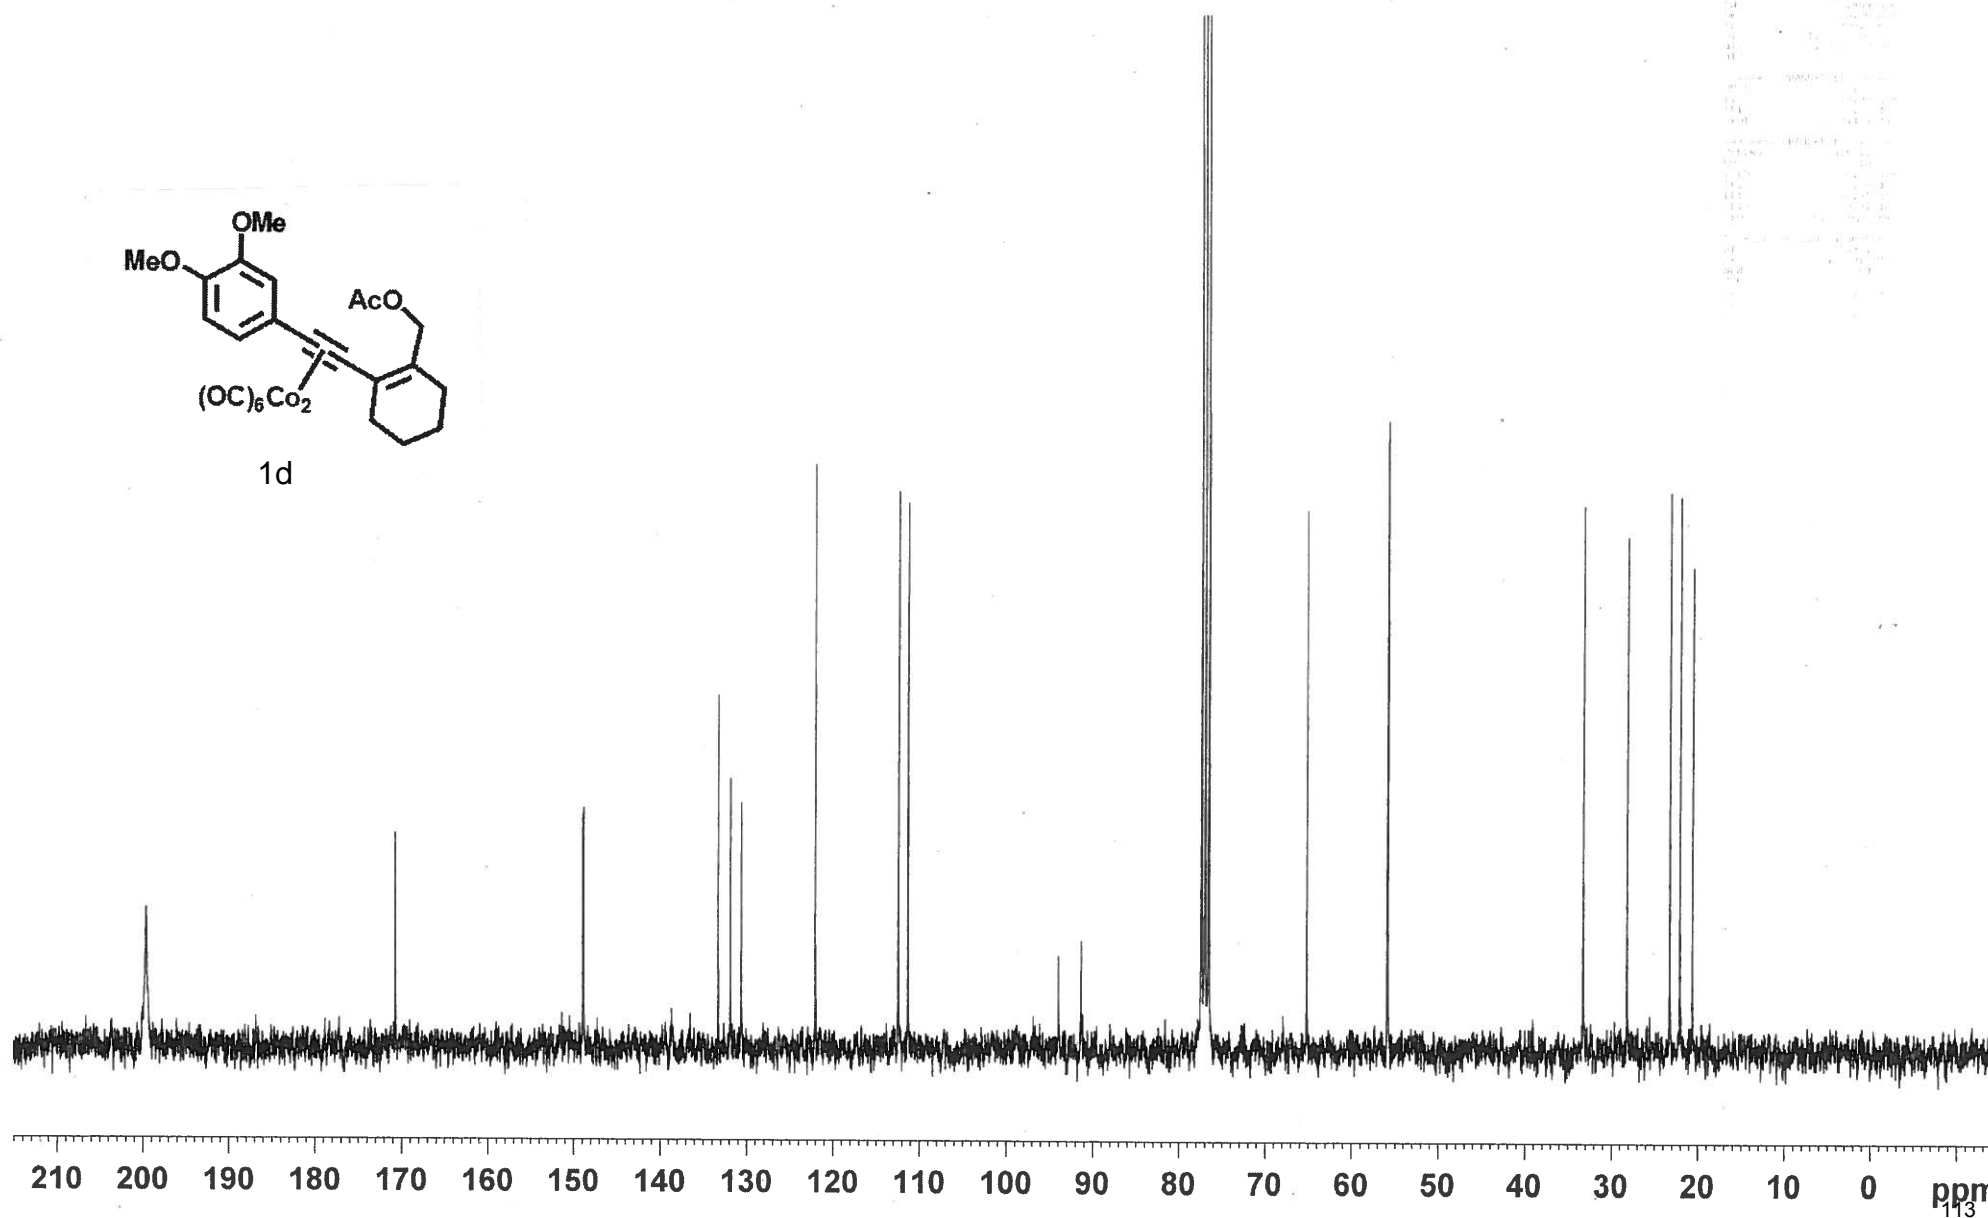

13C NMR spectrum of compound 1d. The x-axis represents chemical shift in ppm, ranging from 210 to 0. The spectrum shows several sharp peaks: a small peak at ~200 ppm, a peak at ~170 ppm, a peak at ~150 ppm, a cluster of peaks between 130 and 140 ppm, a peak at ~120 ppm, a peak at ~110 ppm, a small peak at ~90 ppm, a small peak at ~80 ppm, a very tall, sharp peak at ~75 ppm, a peak at ~60 ppm, a peak at ~50 ppm, a peak at ~30 ppm, and a cluster of peaks between 20 and 30 ppm.

methoxy-1,3-CyclopenteneOAc-5  
 Experiment 1 300 Ultra Topspin  
 Friday 25 November 2011

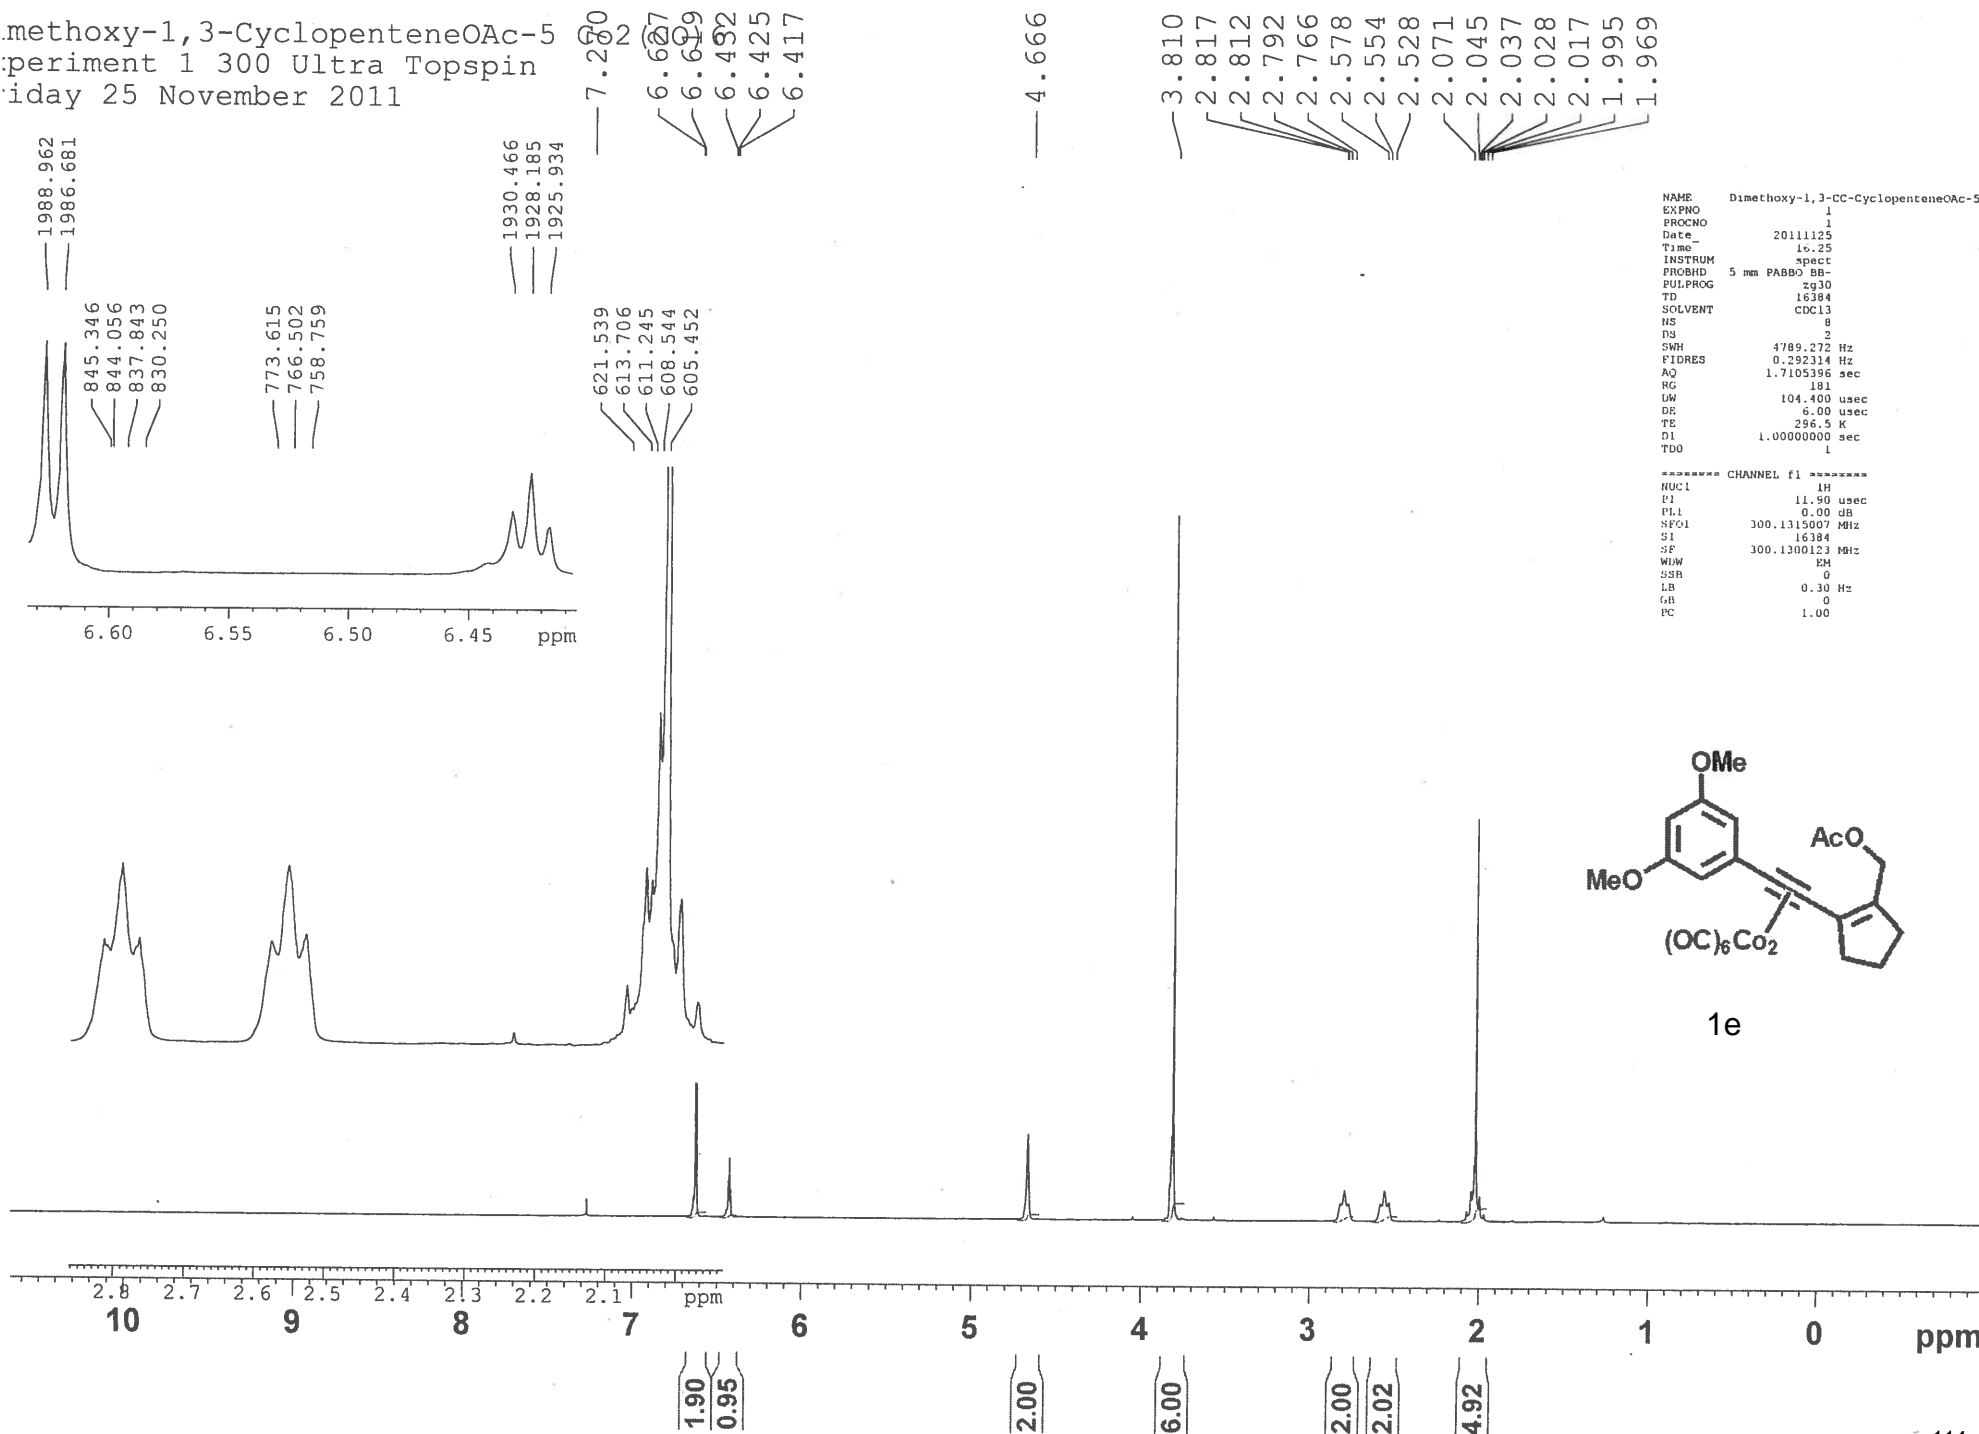

NAME Dimethoxy-1,3-CC-CyclopenteneOAc-5 Co<sub>2</sub>(CO)<sub>6</sub>  
 EXPNO 1  
 PROCNO 1  
 Date\_ 20111125  
 Time\_ 16.25  
 INSTRUM spect  
 PROBHD 5 mm PABBO BB-  
 PULPROG zg30  
 TD 16384  
 SOLVENT CDCl<sub>3</sub>  
 NS 8  
 DS 2  
 SWH 4789.272 Hz  
 FIDRES 0.292314 Hz  
 AQ 1.7105396 sec  
 RG 181  
 DW 104.400 usec  
 DE 6.00 usec  
 TE 296.5 K  
 D1 1.00000000 sec  
 TDO 1

\*\*\*\*\* CHANNEL f1 \*\*\*\*\*  
 NUC1 1H  
 P1 11.90 usec  
 PL1 0.00 dB  
 SFO1 300.1315007 MHz  
 SI 16384  
 SF 300.1300123 MHz  
 WJW EM  
 SSB 0  
 LB 0.30 Hz  
 GB 0  
 PC 1.00

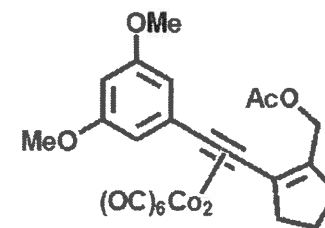

1e

methoxy-1,3-CC-CyclopenteneOAc-5. Co<sub>2</sub>(CO)<sub>6</sub> 13C.  
 Experiment 1 Ultra 300  
 Today 25 November 2011

Topspin

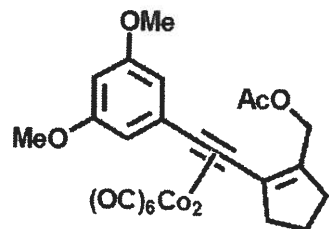

1e

|         |                                    |
|---------|------------------------------------|
| NAME    | 1-methoxy-1,3-cyclopentadiene-5-yl |
| EXPNO   | 1                                  |
| PROC    | 1                                  |
| DATE_   | 20111125                           |
| TIME    | 16.16                              |
| PROBHD  | 5mm QNP 1H/13                      |
| PULPROG | zgpg30                             |
| TD      | 16384                              |
| TE      | 300.2                              |
| NUC1    | 13C                                |
| NUC2    | 1H                                 |
| Q1      | 1.905,611                          |
| Q2      | 1.000,000                          |
| Q3      | 0.145,000                          |
| Q4      | 0.043,000                          |
| Q5      | 0.000,000                          |
| Q6      | 0.000,000                          |
| Q7      | 0.000,000                          |
| Q8      | 0.000,000                          |
| Q9      | 0.000,000                          |
| Q10     | 0.000,000                          |
| Q11     | 0.000,000                          |
| Q12     | 0.000,000                          |
| Q13     | 0.000,000                          |
| Q14     | 0.000,000                          |
| Q15     | 0.000,000                          |
| Q16     | 0.000,000                          |
| Q17     | 0.000,000                          |
| Q18     | 0.000,000                          |
| Q19     | 0.000,000                          |
| Q20     | 0.000,000                          |
| Q21     | 0.000,000                          |
| Q22     | 0.000,000                          |
| Q23     | 0.000,000                          |
| Q24     | 0.000,000                          |
| Q25     | 0.000,000                          |
| Q26     | 0.000,000                          |
| Q27     | 0.000,000                          |
| Q28     | 0.000,000                          |
| Q29     | 0.000,000                          |
| Q30     | 0.000,000                          |
| Q31     | 0.000,000                          |
| Q32     | 0.000,000                          |
| Q33     | 0.000,000                          |
| Q34     | 0.000,000                          |
| Q35     | 0.000,000                          |
| Q36     | 0.000,000                          |
| Q37     | 0.000,000                          |
| Q38     | 0.000,000                          |
| Q39     | 0.000,000                          |
| Q40     | 0.000,000                          |
| Q41     | 0.000,000                          |
| Q42     | 0.000,000                          |
| Q43     | 0.000,000                          |
| Q44     | 0.000,000                          |
| Q45     | 0.000,000                          |
| Q46     | 0.000,000                          |
| Q47     | 0.000,000                          |
| Q48     | 0.000,000                          |
| Q49     | 0.000,000                          |
| Q50     | 0.000,000                          |
| Q51     | 0.000,000                          |
| Q52     | 0.000,000                          |
| Q53     | 0.000,000                          |
| Q54     | 0.000,000                          |
| Q55     | 0.000,000                          |
| Q56     | 0.000,000                          |
| Q57     | 0.000,000                          |
| Q58     | 0.000,000                          |
| Q59     | 0.000,000                          |
| Q60     | 0.000,000                          |
| Q61     | 0.000,000                          |
| Q62     | 0.000,000                          |
| Q63     | 0.000,000                          |
| Q64     | 0.000,000                          |
| Q65     | 0.000,000                          |
| Q66     | 0.000,000                          |
| Q67     | 0.000,000                          |
| Q68     | 0.000,000                          |
| Q69     | 0.000,000                          |
| Q70     | 0.000,000                          |
| Q71     | 0.000,000                          |
| Q72     | 0.000,000                          |
| Q73     | 0.000,000                          |
| Q74     | 0.000,000                          |
| Q75     | 0.000,000                          |
| Q76     | 0.000,000                          |
| Q77     | 0.000,000                          |
| Q78     | 0.000,000                          |
| Q79     | 0.000,000                          |
| Q80     | 0.000,000                          |
| Q81     | 0.000,000                          |
| Q82     | 0.000,000                          |
| Q83     | 0.000,000                          |
| Q84     | 0.000,000                          |
| Q85     | 0.000,000                          |
| Q86     | 0.000,000                          |
| Q87     | 0.000,000                          |
| Q88     | 0.000,000                          |
| Q89     | 0.000,000                          |
| Q90     | 0.000,000                          |
| Q91     | 0.000,000                          |
| Q92     | 0.000,000                          |
| Q93     | 0.000,000                          |
| Q94     | 0.000,000                          |
| Q95     | 0.000,000                          |
| Q96     | 0.000,000                          |
| Q97     | 0.000,000                          |
| Q98     | 0.000,000                          |
| Q99     | 0.000,000                          |
| Q100    | 0.000,000                          |

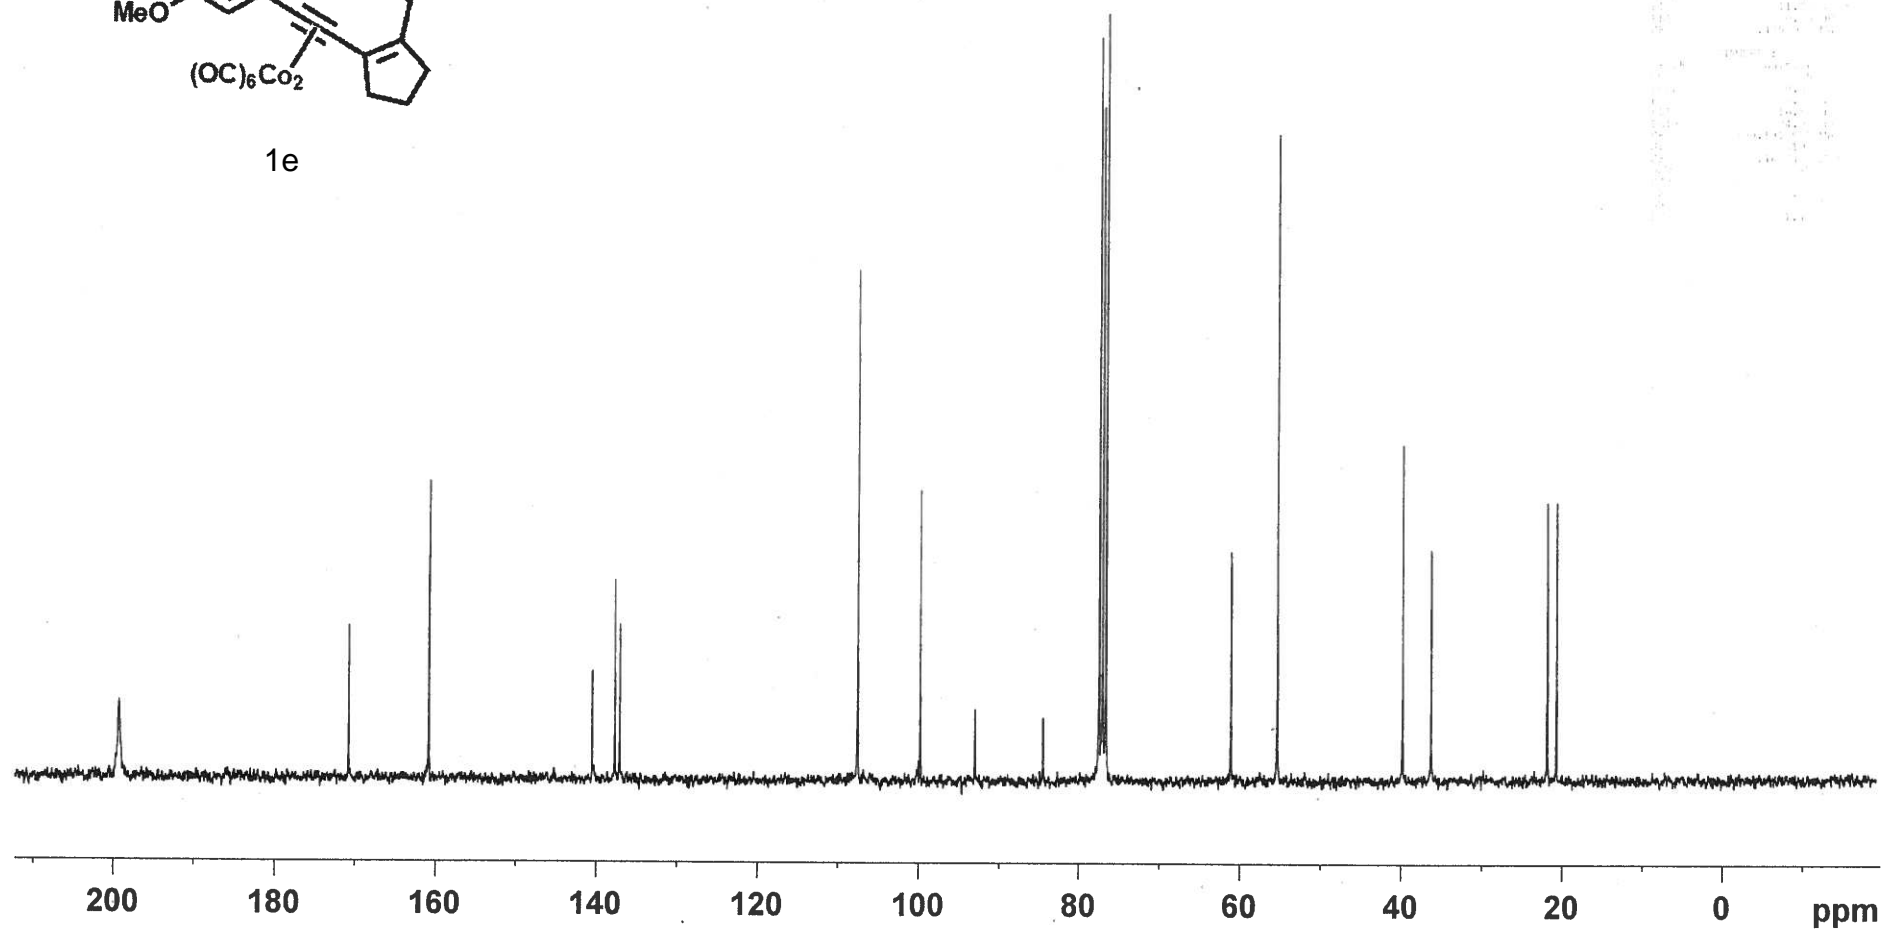

Dimethoxy-1,3-CC-CyclohexeneCH2OAc+5, Co2(CO)6  
 Experiment 1 Topspin 500  
 Tuesday 10 May 2011

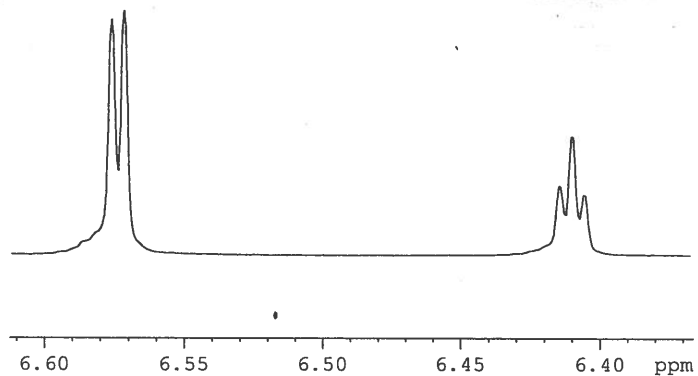

3289.04  
 3286.81  
 3208.22  
 3206.01  
 3203.80  
 7.269  
 6.576  
 6.572  
 6.415  
 6.410  
 6.406  
 4.578  
 3.811  
 2.390  
 2.378  
 2.144  
 2.132  
 2.121  
 1.980  
 1.797  
 1.785  
 1.778  
 1.775  
 1.767  
 1.763  
 1.755  
 1.750  
 1.743  
 1.739  
 1.731  
 1.727  
 1.720  
 1.716  
 1.709  
 1.697

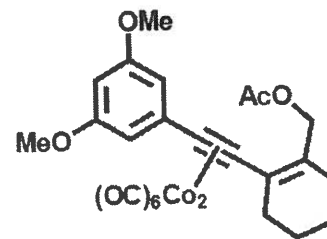

1f

Current Data Parameters  
 NAME Dimethoxy-1,3-CC-CyclohexeneCH2OAc+5, Co2(CO)6  
 EXPNO 1  
 PROCNO 1  
 F2 - Acquisition Parameters  
 Date\_ 20110510  
 Time 13.34  
 INSTRUM spect  
 PROBHD 5 mm PABBO BR/  
 PULPROG zgpg30  
 TD 65536  
 SOLVENT CDCl3  
 NS 8  
 DS 2  
 SWH 10310.570 Hz  
 FIDRES 0.157632 Hz  
 AQ 3.1720407 sec  
 RG 90.5  
 LW 48.400 usec  
 DE 6.50 usec  
 TE 297.2 K  
 D1 1.00000000 sec  
 TDO 1  
 ===== CHANNEL f1 =====  
 NUC1 1H  
 P1 15.00 usec  
 PL1 0.50 dB  
 SFO1 500.1330960 MHz  
 F2 - Processing parameters  
 SI 32768  
 SF 500.1300150 MHz  
 WDW no  
 SSB 0  
 LB 0.00 Hz  
 GB 0  
 PC 1.00

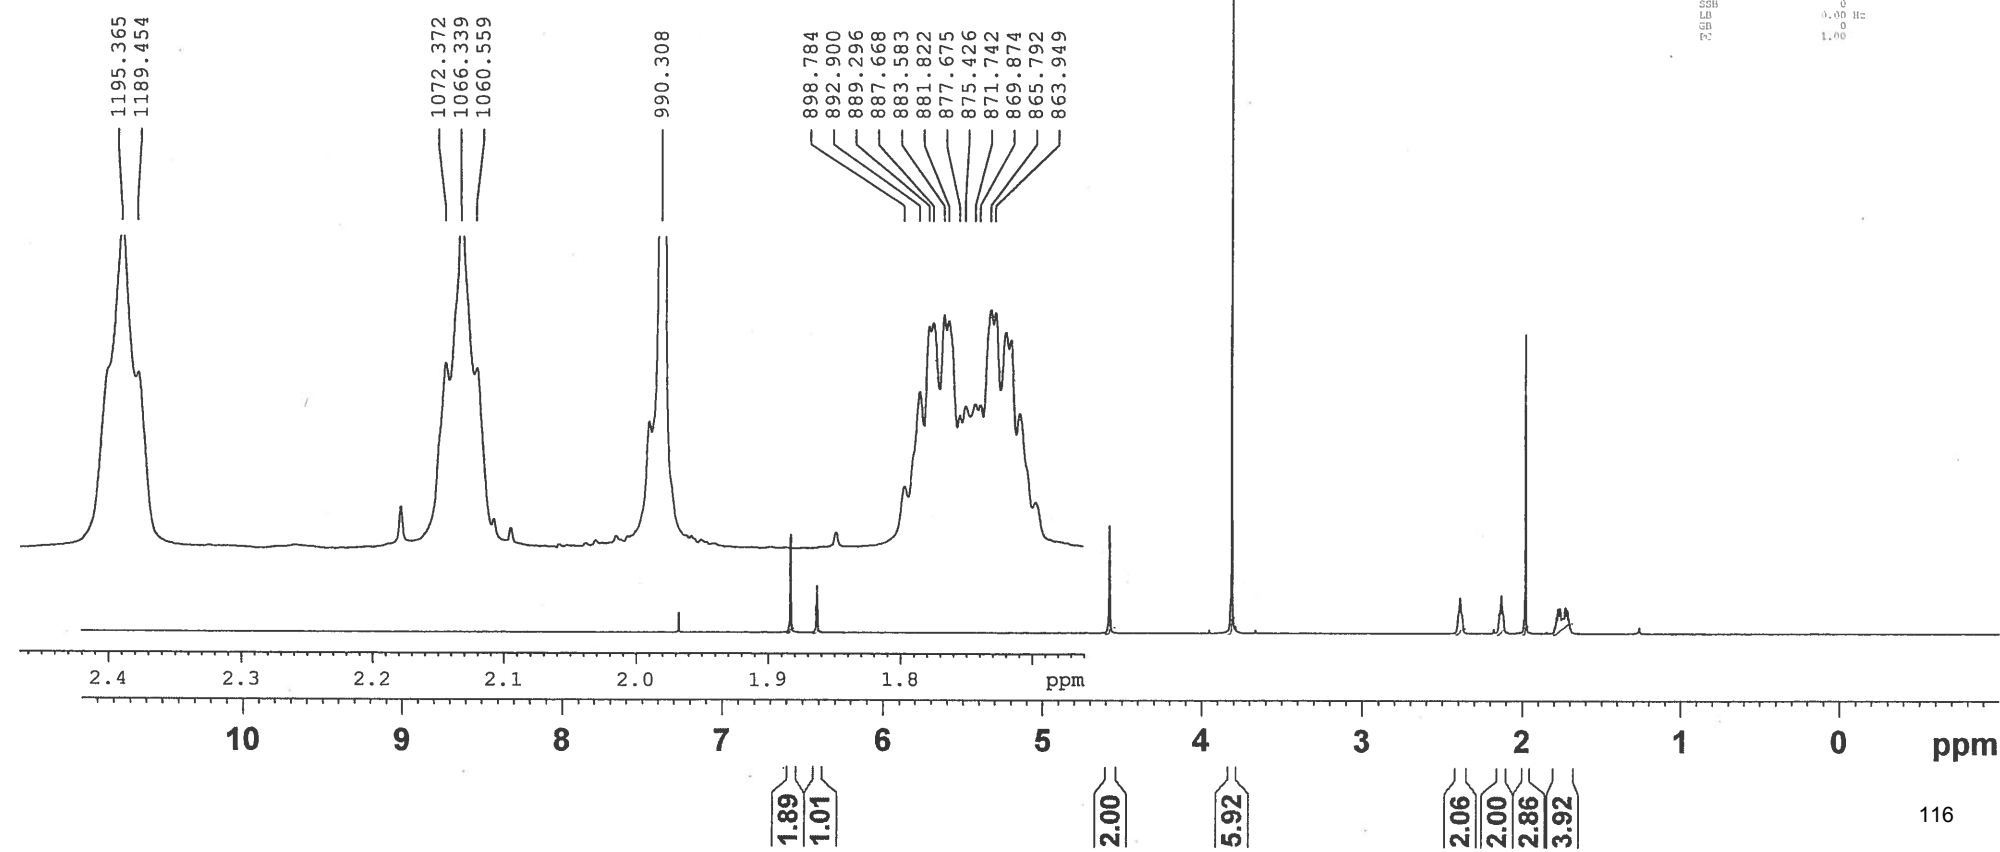



Thursday 05 May 2011

1f

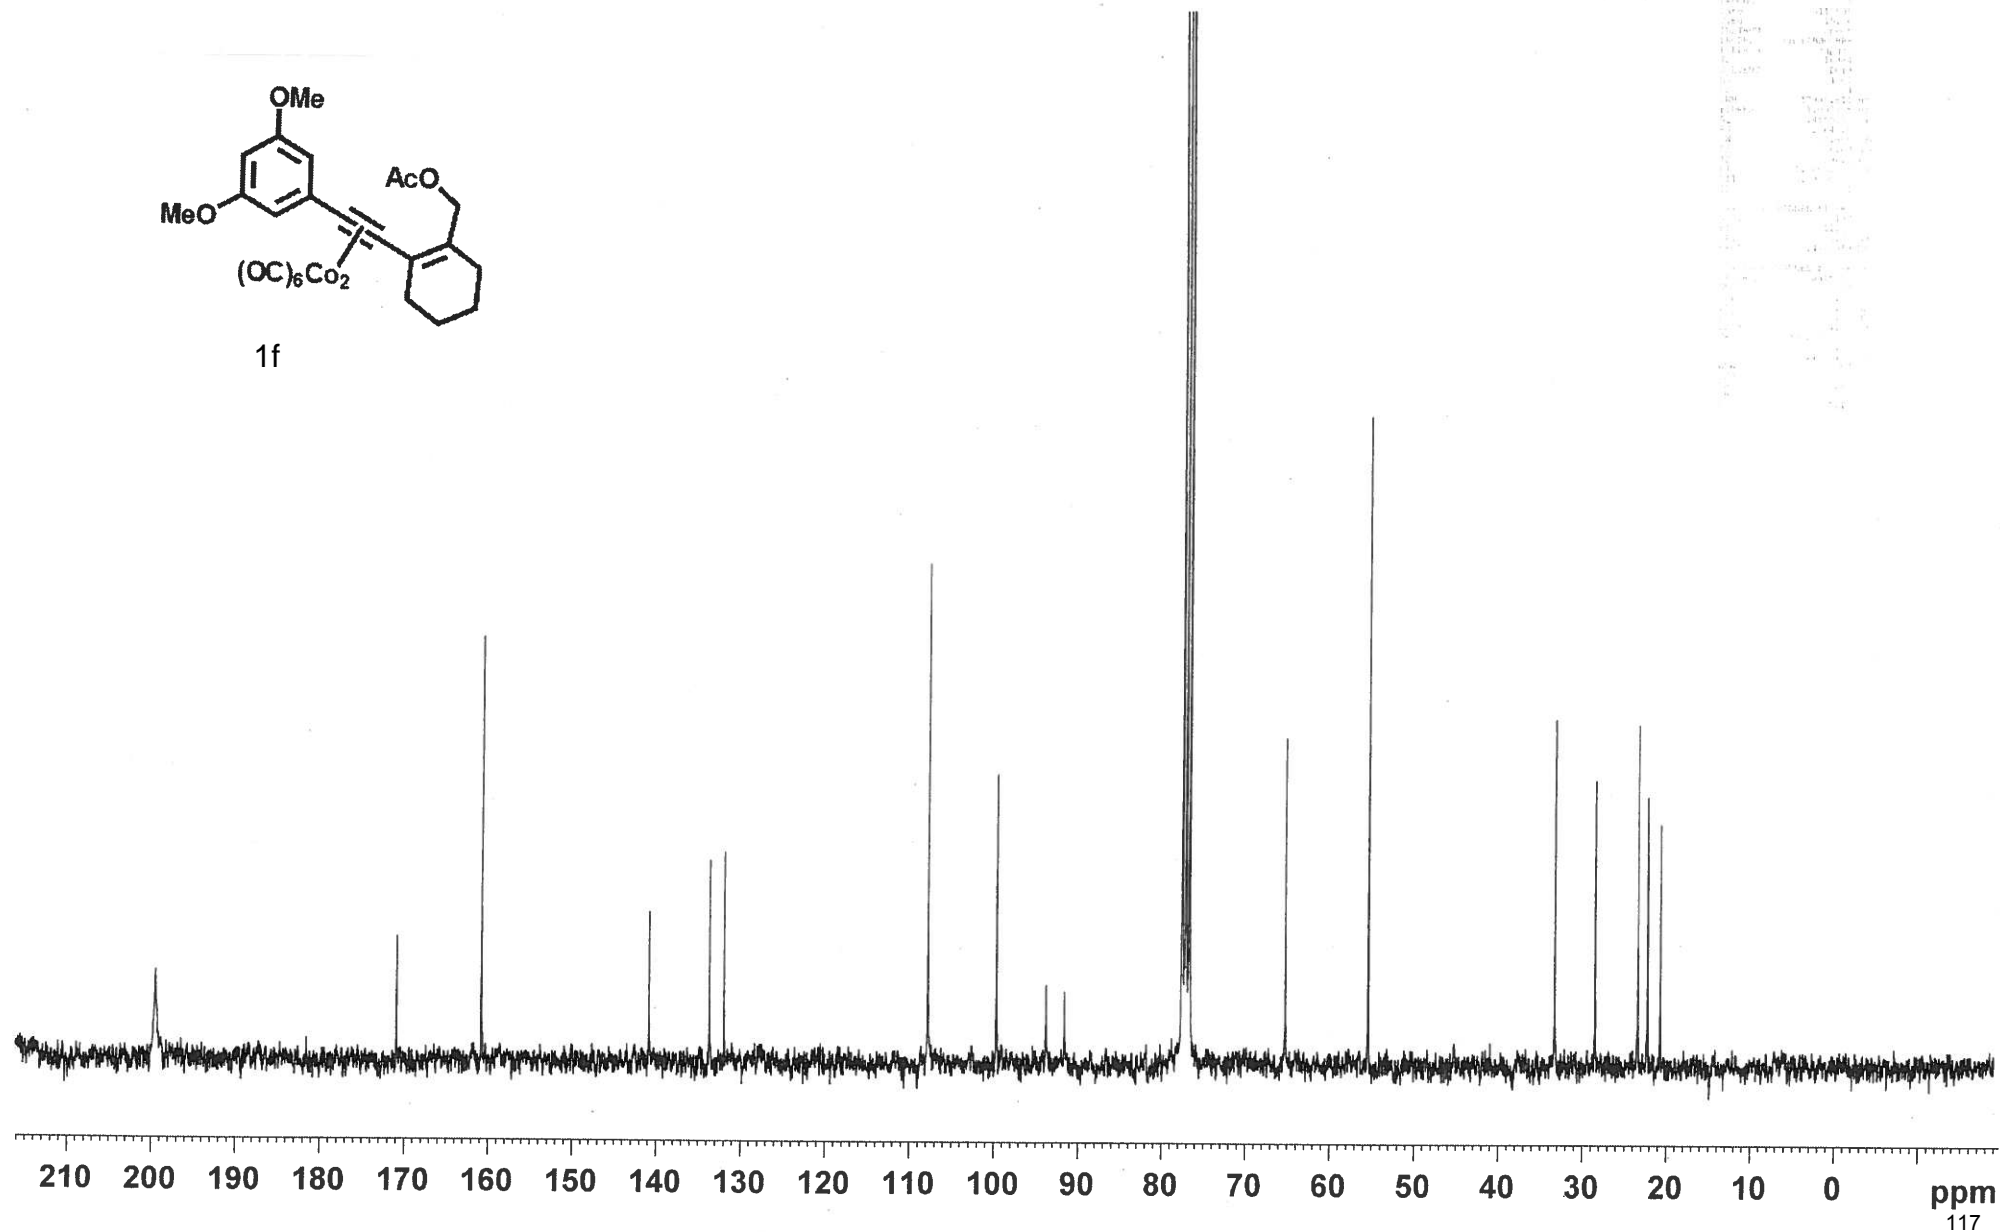

Dimethoxy-1,4-Cyclopenteneacetate-2, Co<sub>2</sub>(CO)<sub>6</sub>  
 Experiment 2  
 Topsin 500

Wednesday 22 September 2010

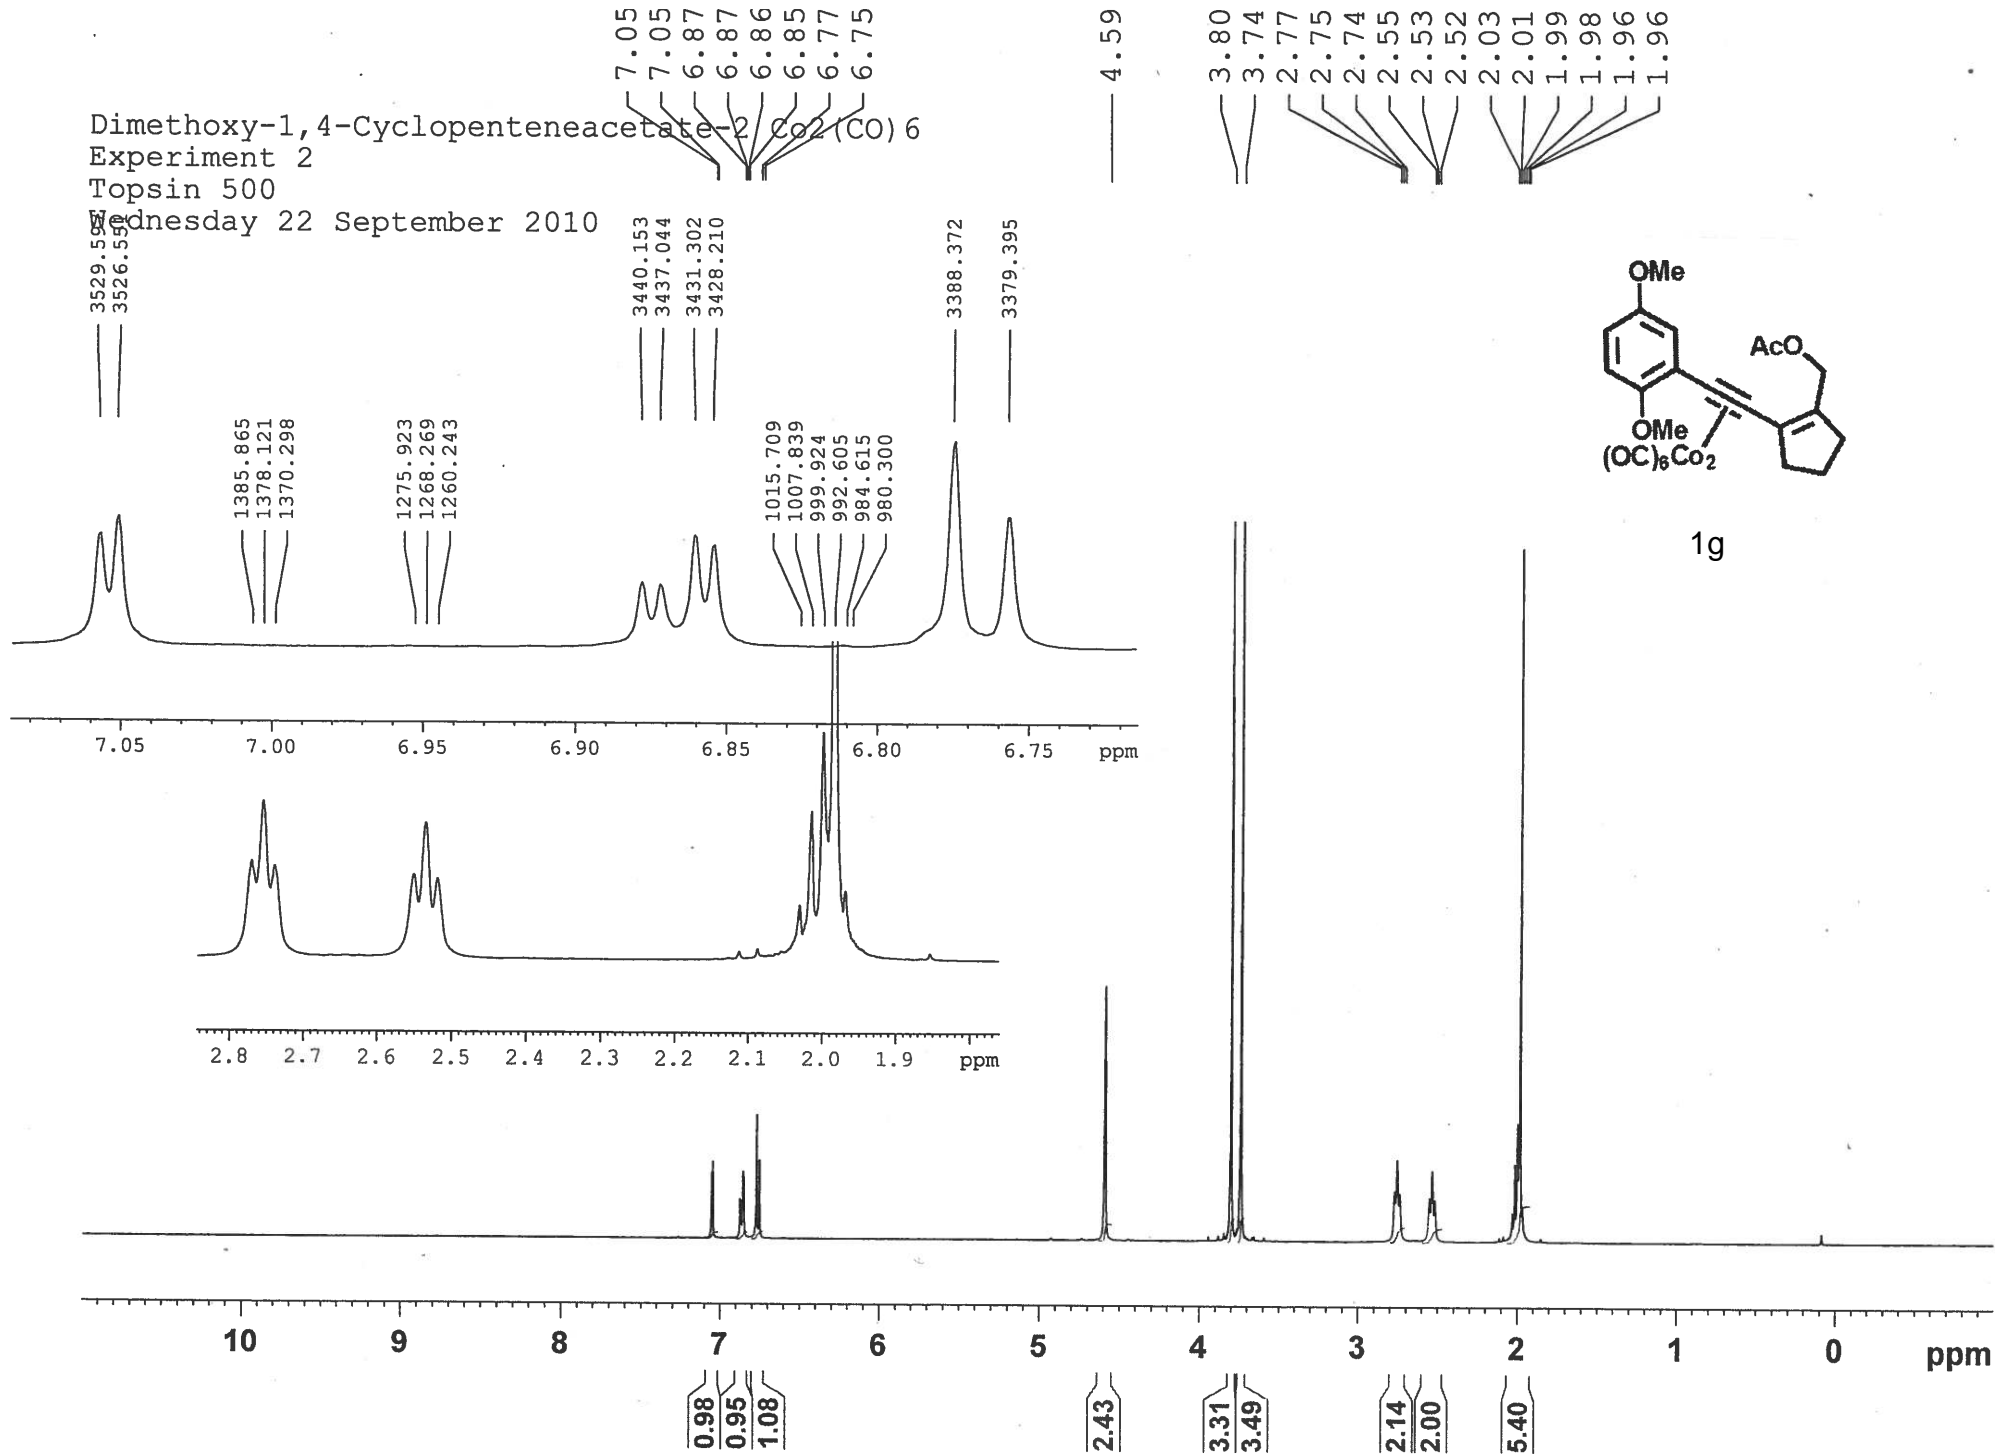

Dimethoxy-1,4-CC-cyclopenteneacetate-2 Co2(CO)6

Experiment 3

Ultra 300

Wednesday 22 September 2010

199.77

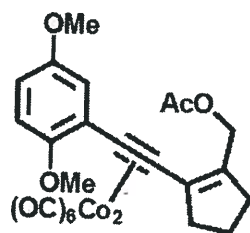

1g

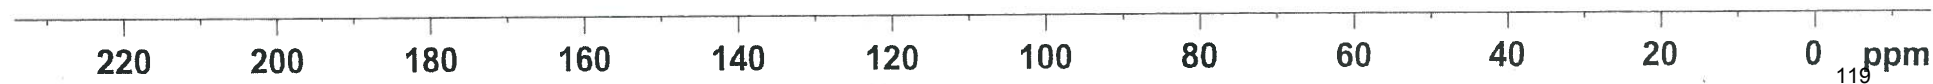

Dimethoxy-1,4-Cyclohexeneacetate-2 Co<sub>2</sub> (CO)<sub>6</sub>  
 Experiment 2  
 500 Tpsin  
 Friday 09 July 2010

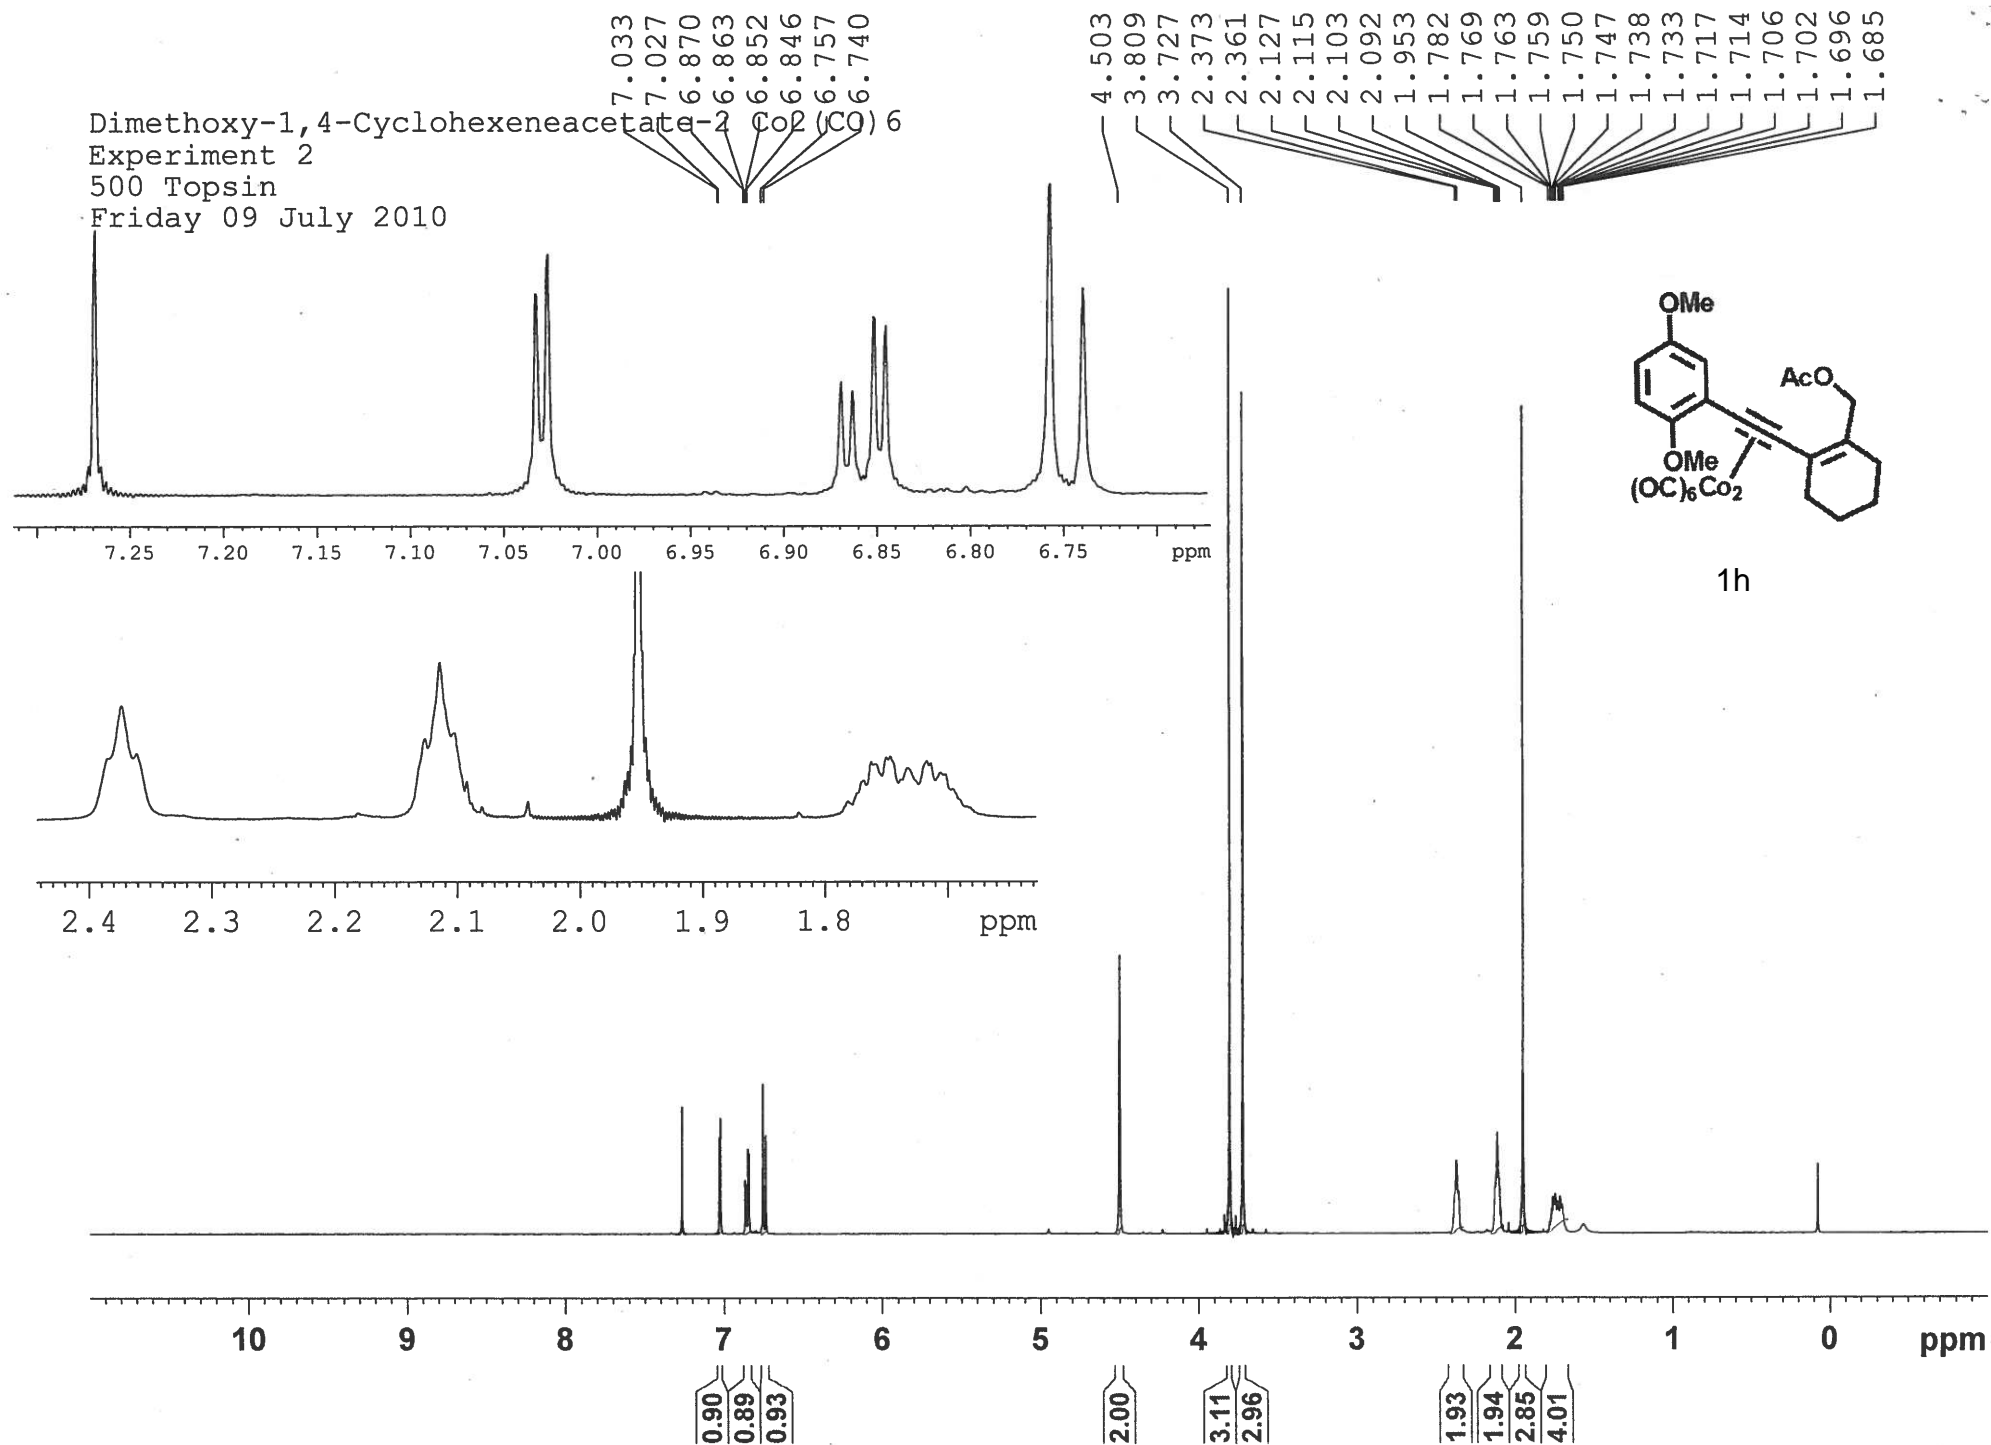

Dimethoxy-1,4-CyclohexeneOAc-2 Co2 (CO) 6 13C

Experiment 2

Ultra 300

Wednesday 14 July 2010

199.92

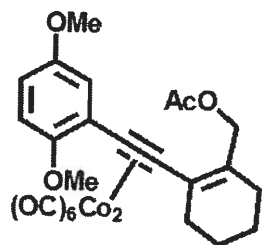

1h

220 200 180 160 140 120 100 80 60 40 20 0 ppm

153.60  
150.29

133.15  
132.45  
127.63

117.42  
113.61  
110.40

94.96  
89.25

77.56  
77.33  
77.15  
76.72

65.12

55.79  
54.61

33.08  
28.31  
23.49  
22.43  
20.92

Dimethoxy-1,4-CyclohepteneOAc-2 Co2(CO)6  
 Experiment 5 Toppspsin 500  
 Thursday 06 January 2011

Current Data Parameters  
 NAME Dimethoxy-1,4-CyclohepteneOAc-2 Co2(CO)6  
 EXPNO 5  
 PROCNO 1

F2 - Acquisition Parameters  
 Date\_ 20110106  
 Time 10.55  
 INSTRUM spect  
 PROBHD 5 mm PABBO BB/  
 PULPROG zgpg30  
 TD 32768  
 SOLVENT H2O  
 NS 8  
 DS 2  
 SWH 10964.912 Hz  
 FIDRES 0.334623 Hz  
 AQ 1.4942708 sec  
 RG 40.3  
 DW 45.600 usec  
 DE 6.50 usec  
 TE 291.2 K  
 D1 2.00000000 sec  
 d12 0.00002000 sec  
 D16 0.00020000 sec  
 TD0 1

===== CHANNEL f1 =====  
 NUC1 1H  
 P1 14.80 usec  
 P2 29.60 usec  
 P12 2000.00 usec  
 PL0 120.00 dB  
 PL1 -1.40 dB  
 SFO1 500.1305251 MHz  
 SP1 35.19 dB  
 SPNAM1 Squal100.1000  
 SPOAL1 0.500  
 SPOFFS1 0.00 Hz

===== GRADIENT CHANNEL =====  
 GPNAM1 SINE.100  
 GPNAM2 SINE.100  
 GP21 31.00 %  
 GP22 11.00 %  
 P16 1000.00 usec

F2 - Processing parameters  
 SI 32768  
 SF 500.1300187 MHz  
 WDW EM  
 SSB 0  
 LB 0.30 Hz  
 GB 0  
 FC 1.00

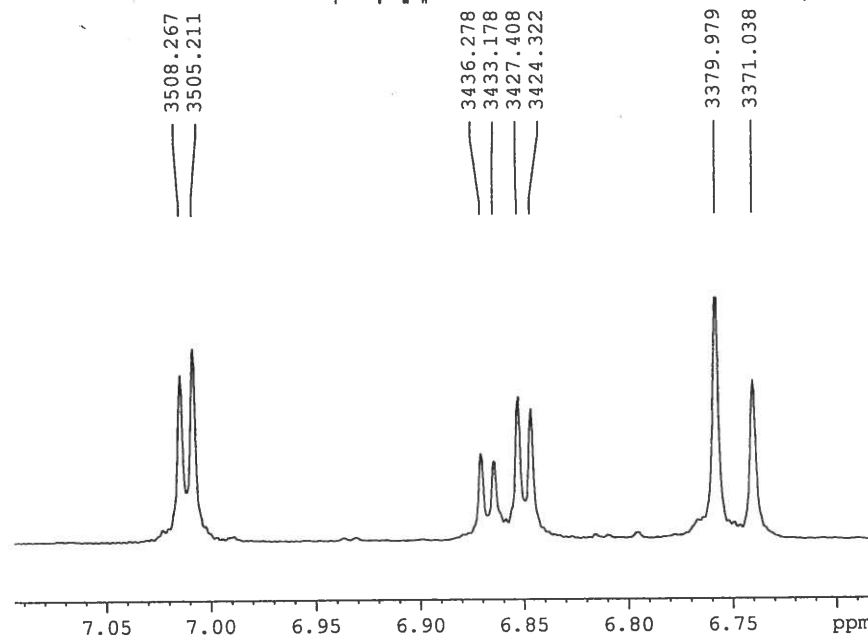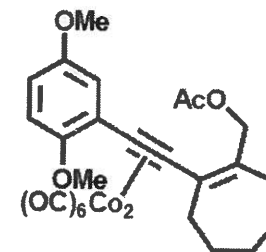

1i

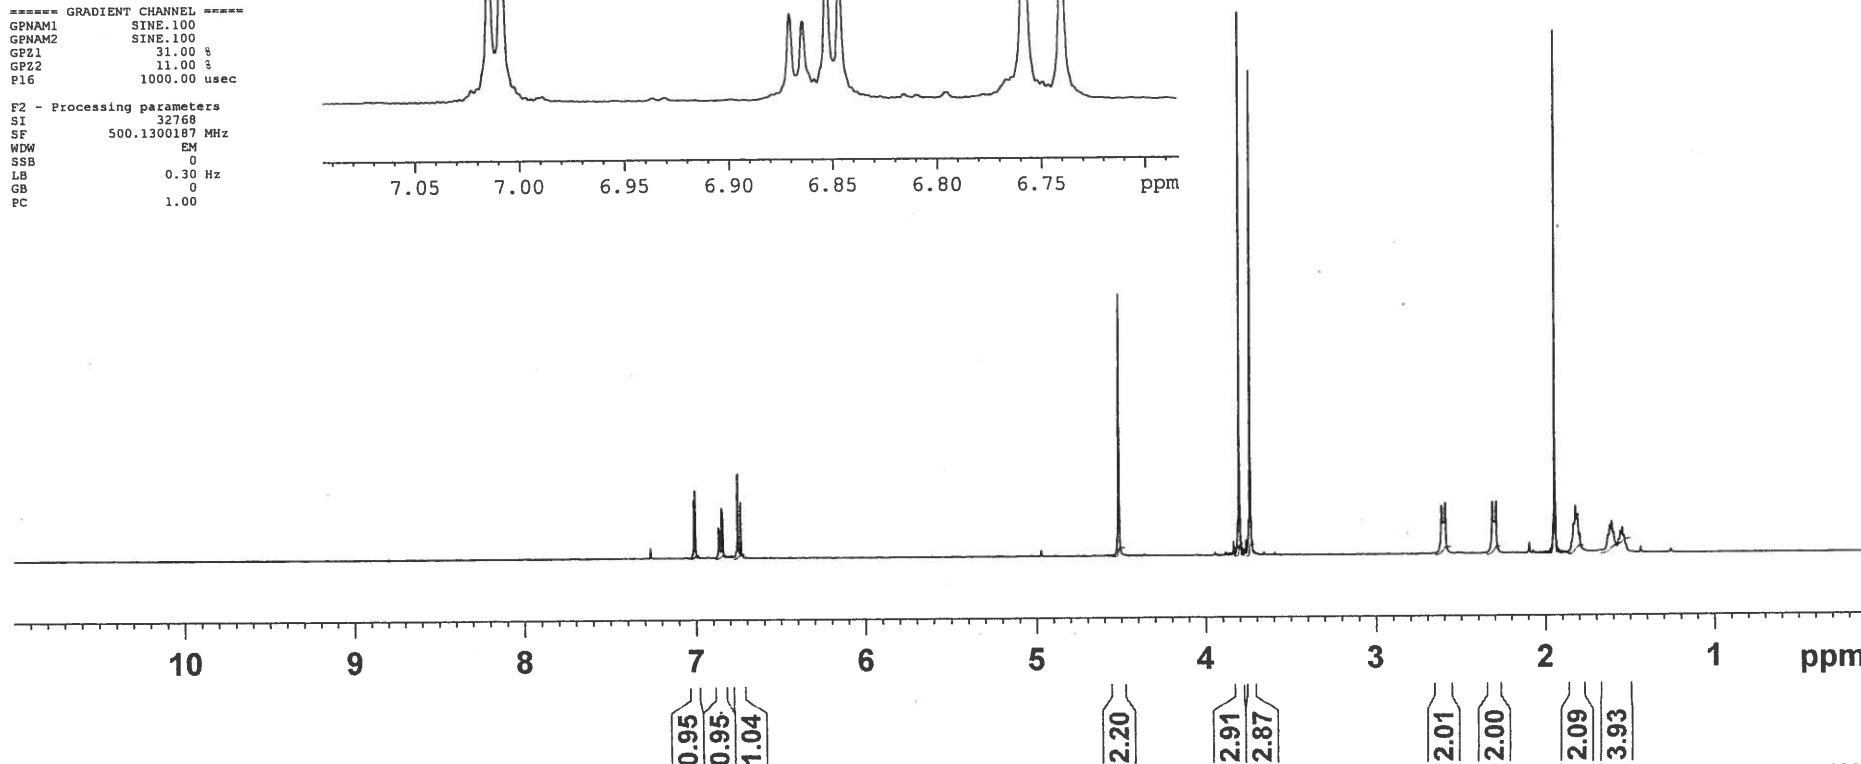

Dimethoxy-1,4-CC-Cyclohepteneacetate-2 Co<sub>2</sub>(CO)<sub>6</sub> <sup>13</sup>C  
 Experiment 5 Ultra 300  
 Saturday 08 January 2011

199.92

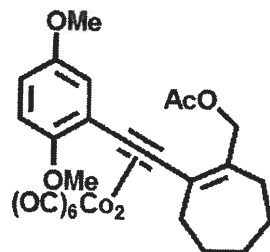

1i

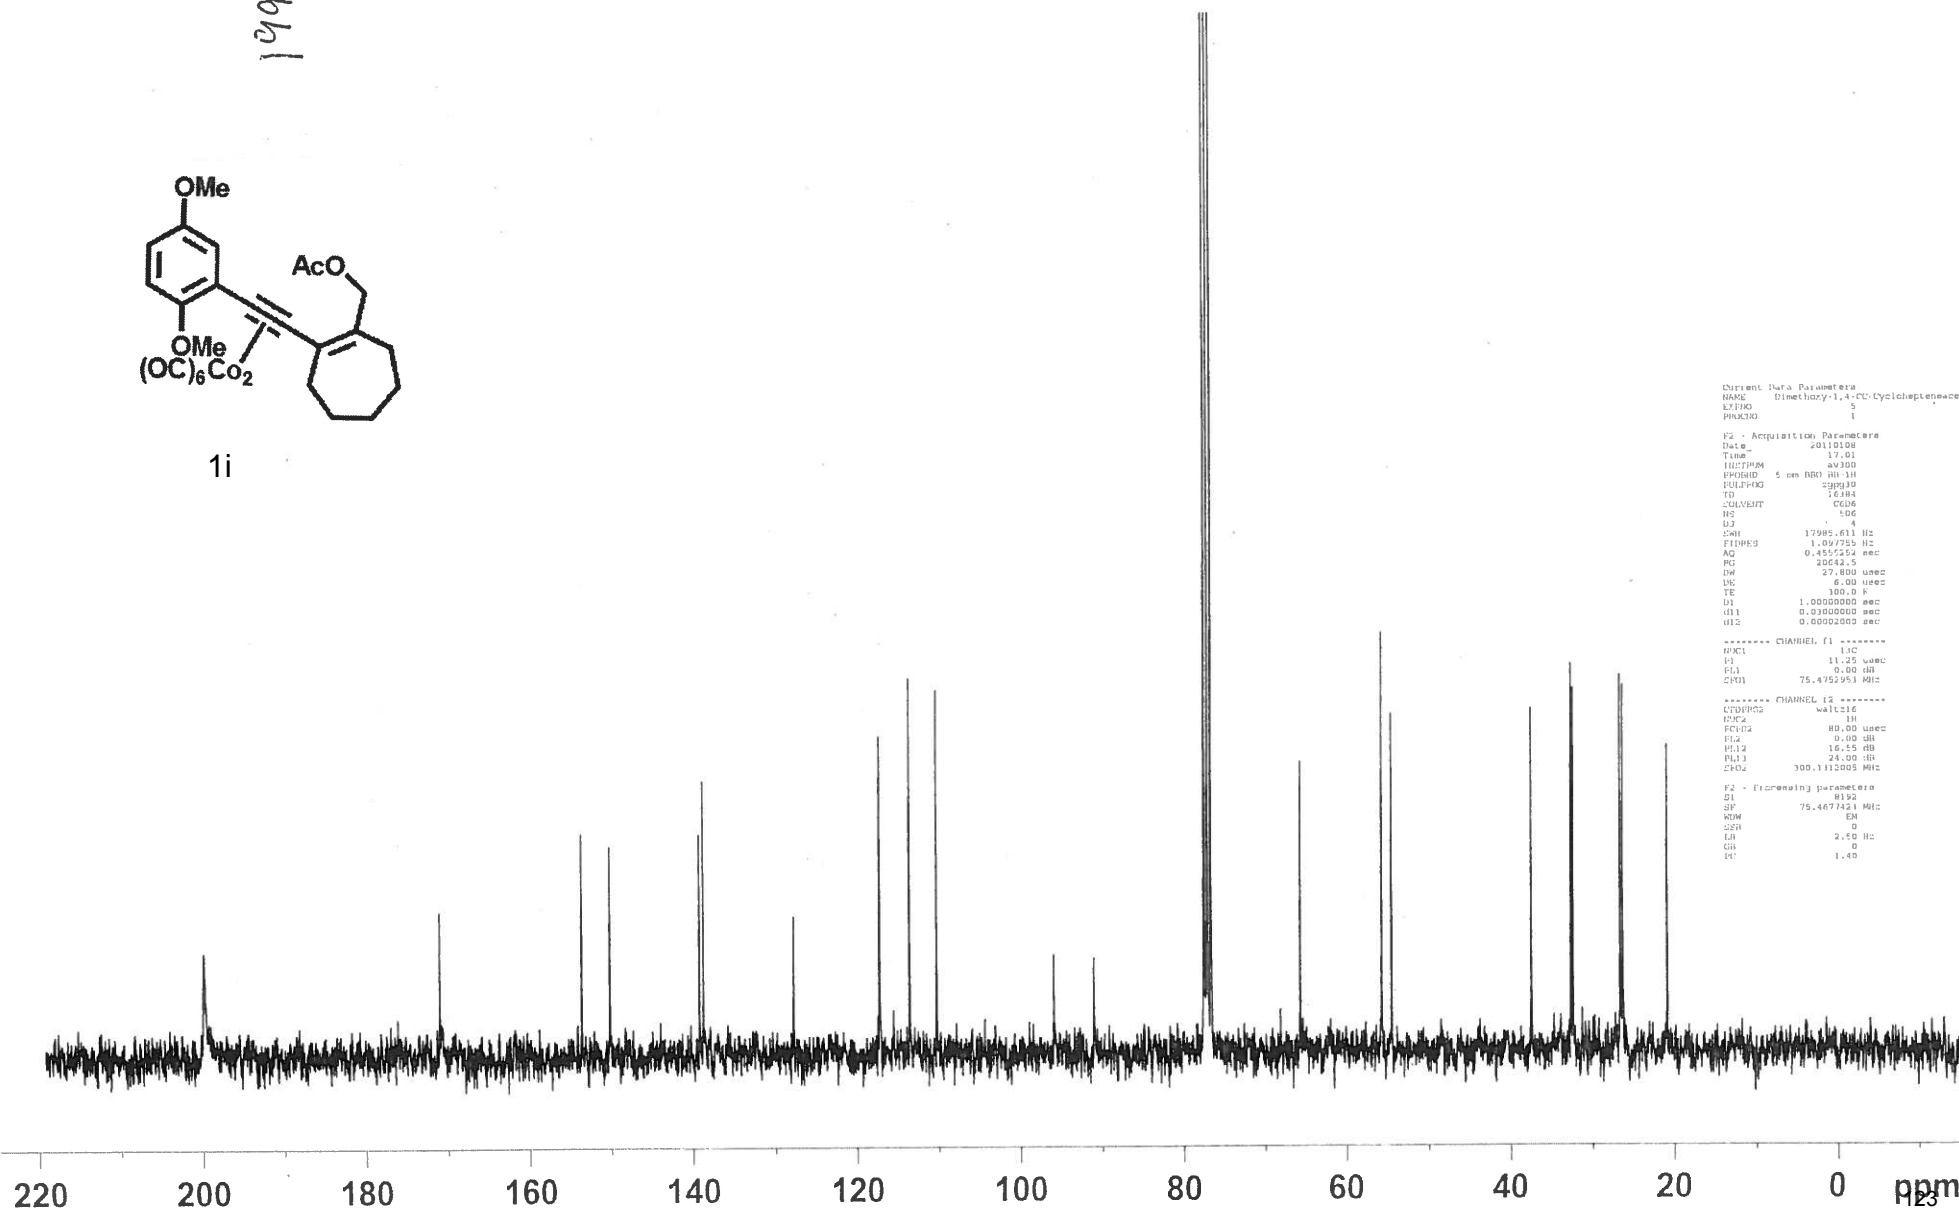

Current Data Parameters  
 NAME Dimethoxy-1,4-CC-Cyclohepteneacetate-2 Co<sub>2</sub>(CO)<sub>6</sub>  
 EXPNO 5  
 PROCNO 1

F2 - Acquisition Parameters  
 Date\_ 20110108  
 Time 17.01  
 INSTRUM av300  
 PROBHD 5 mm BBO RH-1H  
 PULPROG zgpg30  
 TD 65536  
 SFO 300.13505  
 SOLVENT CDCl<sub>3</sub>  
 NS 4  
 DS 4  
 SWH 17985.611 Hz  
 FWHZ 1.09775 Hz  
 AQ 0.455254 sec  
 RG 20642.5  
 DW 27.800 usec  
 DE 6.00 usec  
 TE 300.0 K  
 D1 1.0000000 sec  
 d11 0.0300000 sec  
 d12 0.0002000 sec

\*\*\*\*\* CHANNEL f1 \*\*\*\*\*  
 NUC1 <sup>13</sup>C  
 P1 11.25 usec  
 PL1 0.00 dB  
 SFO1 75.4752951 MHz

\*\*\*\*\* CHANNEL f2 \*\*\*\*\*  
 C13P1216  
 NUC2 <sup>13</sup>C  
 P12 80.00 usec  
 PL12 0.00 dB  
 PL12 16.25 dB  
 PL13 24.00 dB  
 SFO2 300.135005 MHz

F2 - Processing parameters  
 SI 8192  
 SF 75.4673421 MHz  
 EN  
 DSF 0  
 LB 2.40 Hz  
 GB 0  
 PC 1.40

3586.950  
3578.102

3322.770  
3313.851  
- 7.17  
- 7.15  
- 6.64  
- 6.62

— 4.64  
— 3.95  
— 3.89  
— 3.84  
— 2.77  
— 2.75  
— 2.74  
— 2.57  
— 2.55  
— 2.54  
— 2.03  
— 2.02  
— 2.00  
— 1.98  
— 1.97  
— 1.97

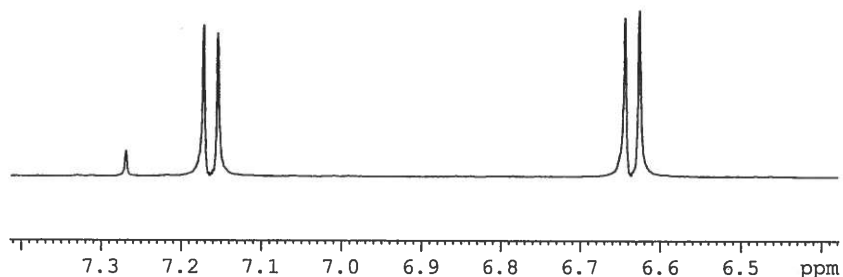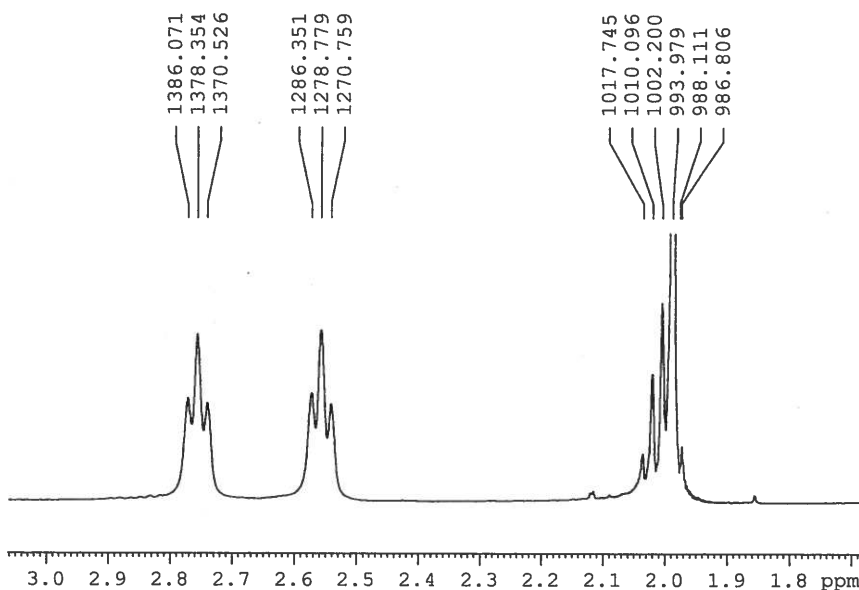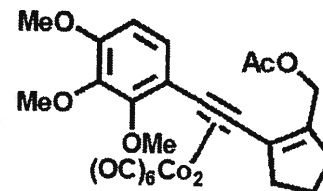

1j

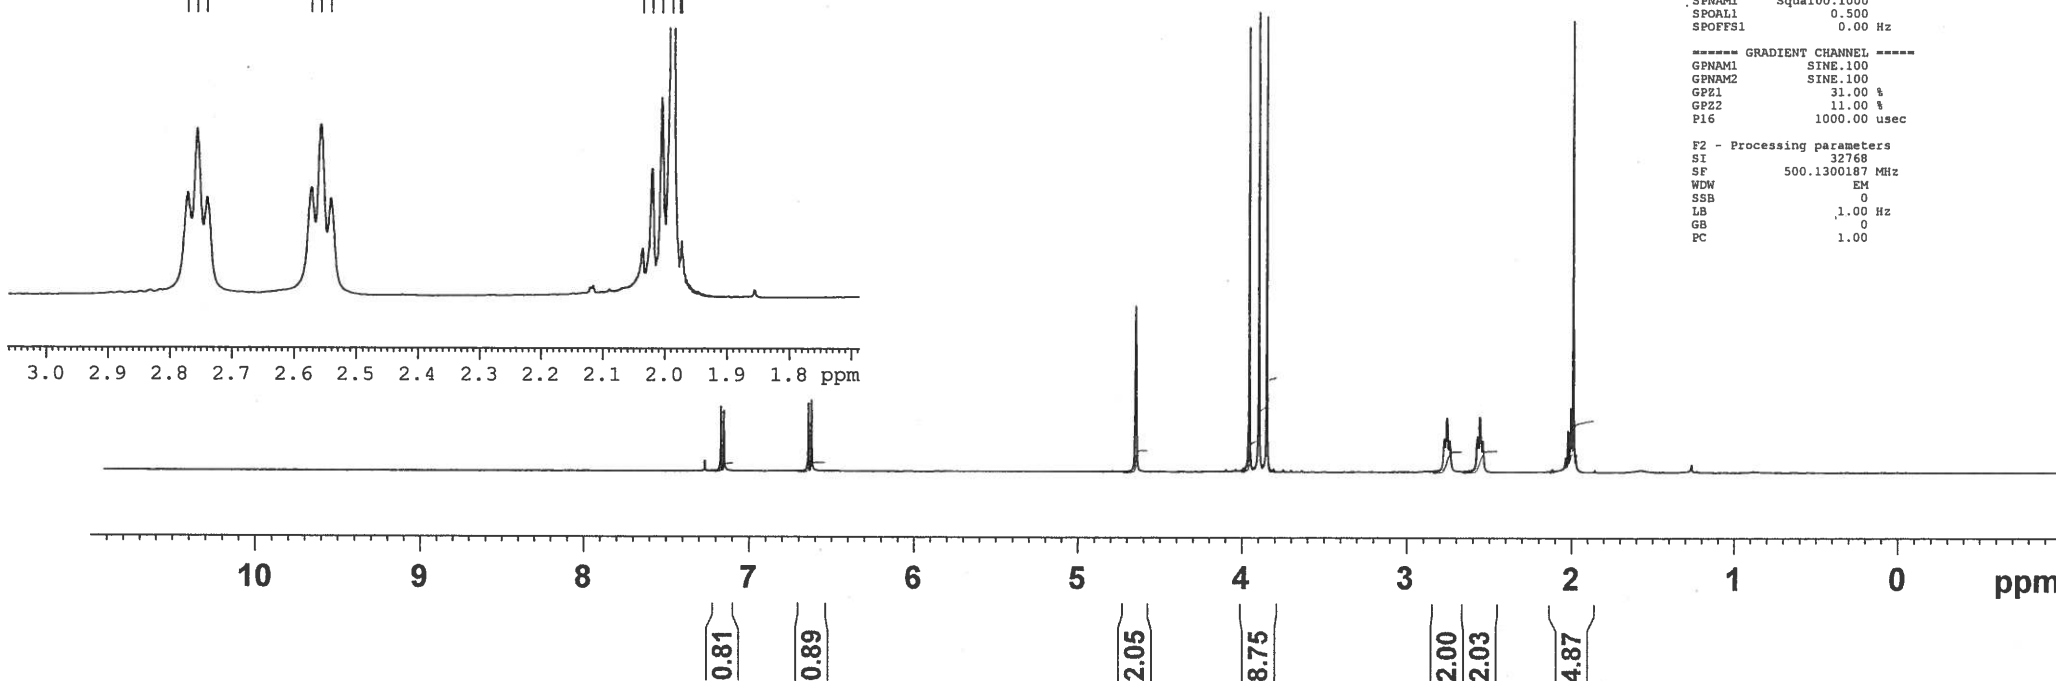

```
Current Data Parameters
NAME      Trimethoxy-4-CC-CyclopenteneOAc Co2(CO)6
EXPNO     2
PROCNO    1
```

```

F2 - Acquisition Parameters
Date_      20101006
Time       13.50
INSTRUM    spect
PROBHD     5 mm PABBO BB/
PULPROG    zgpg3p
TD          32768
SOLVENT     H2O
NS          8
DS          2
SWH         10964.912 Hz
FIDRES     0.334623 Hz
AQ          1.4943165 sec
RG          80.6
DW          45.600 usec
DE          6.50 usec
TE          298.2 K
D1          2.00000000 sec
d12         0.00020000 sec
d13         0.00020000 sec
TD0         1

```

```

      *** CHANNEL f1 ***
NUC1                               1H
P1                                14.80    usec
p2                                 29.60    usec
PI2                             2000.00    usec
PLO                              120.00   dB
PLI                              -1.40   dB
SFO1                            500.1300000 MHz
SP1                               35.19   dB
     SPNAM1       Squal100.1000
SPOAL1                          0.5000
SPOFFS1                       0.00 Hz

```

```
===== GRADIENT CHANNEL =====
GPNAME1      SINE.100
GPNAME2      SINE.100
GPZ1         31.00 %
GPZ2         11.00 %
P16          1000.00 usec
```

```
F2 - Processing parameters
SI              32768
SF              500.1300187 MHz
WDW             EM
SSB             0
LB              1.00 Hz
GB              0
PC              1.00
```



Trimethoxy-4-CyclopenteneOAc Co<sub>2</sub>(CO)<sub>6</sub> <sup>13</sup>C  
 Ultra 300  
 Wednesday 06 October 2010

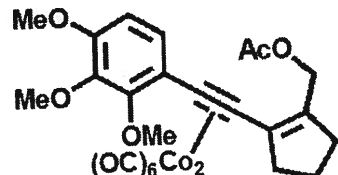

1j

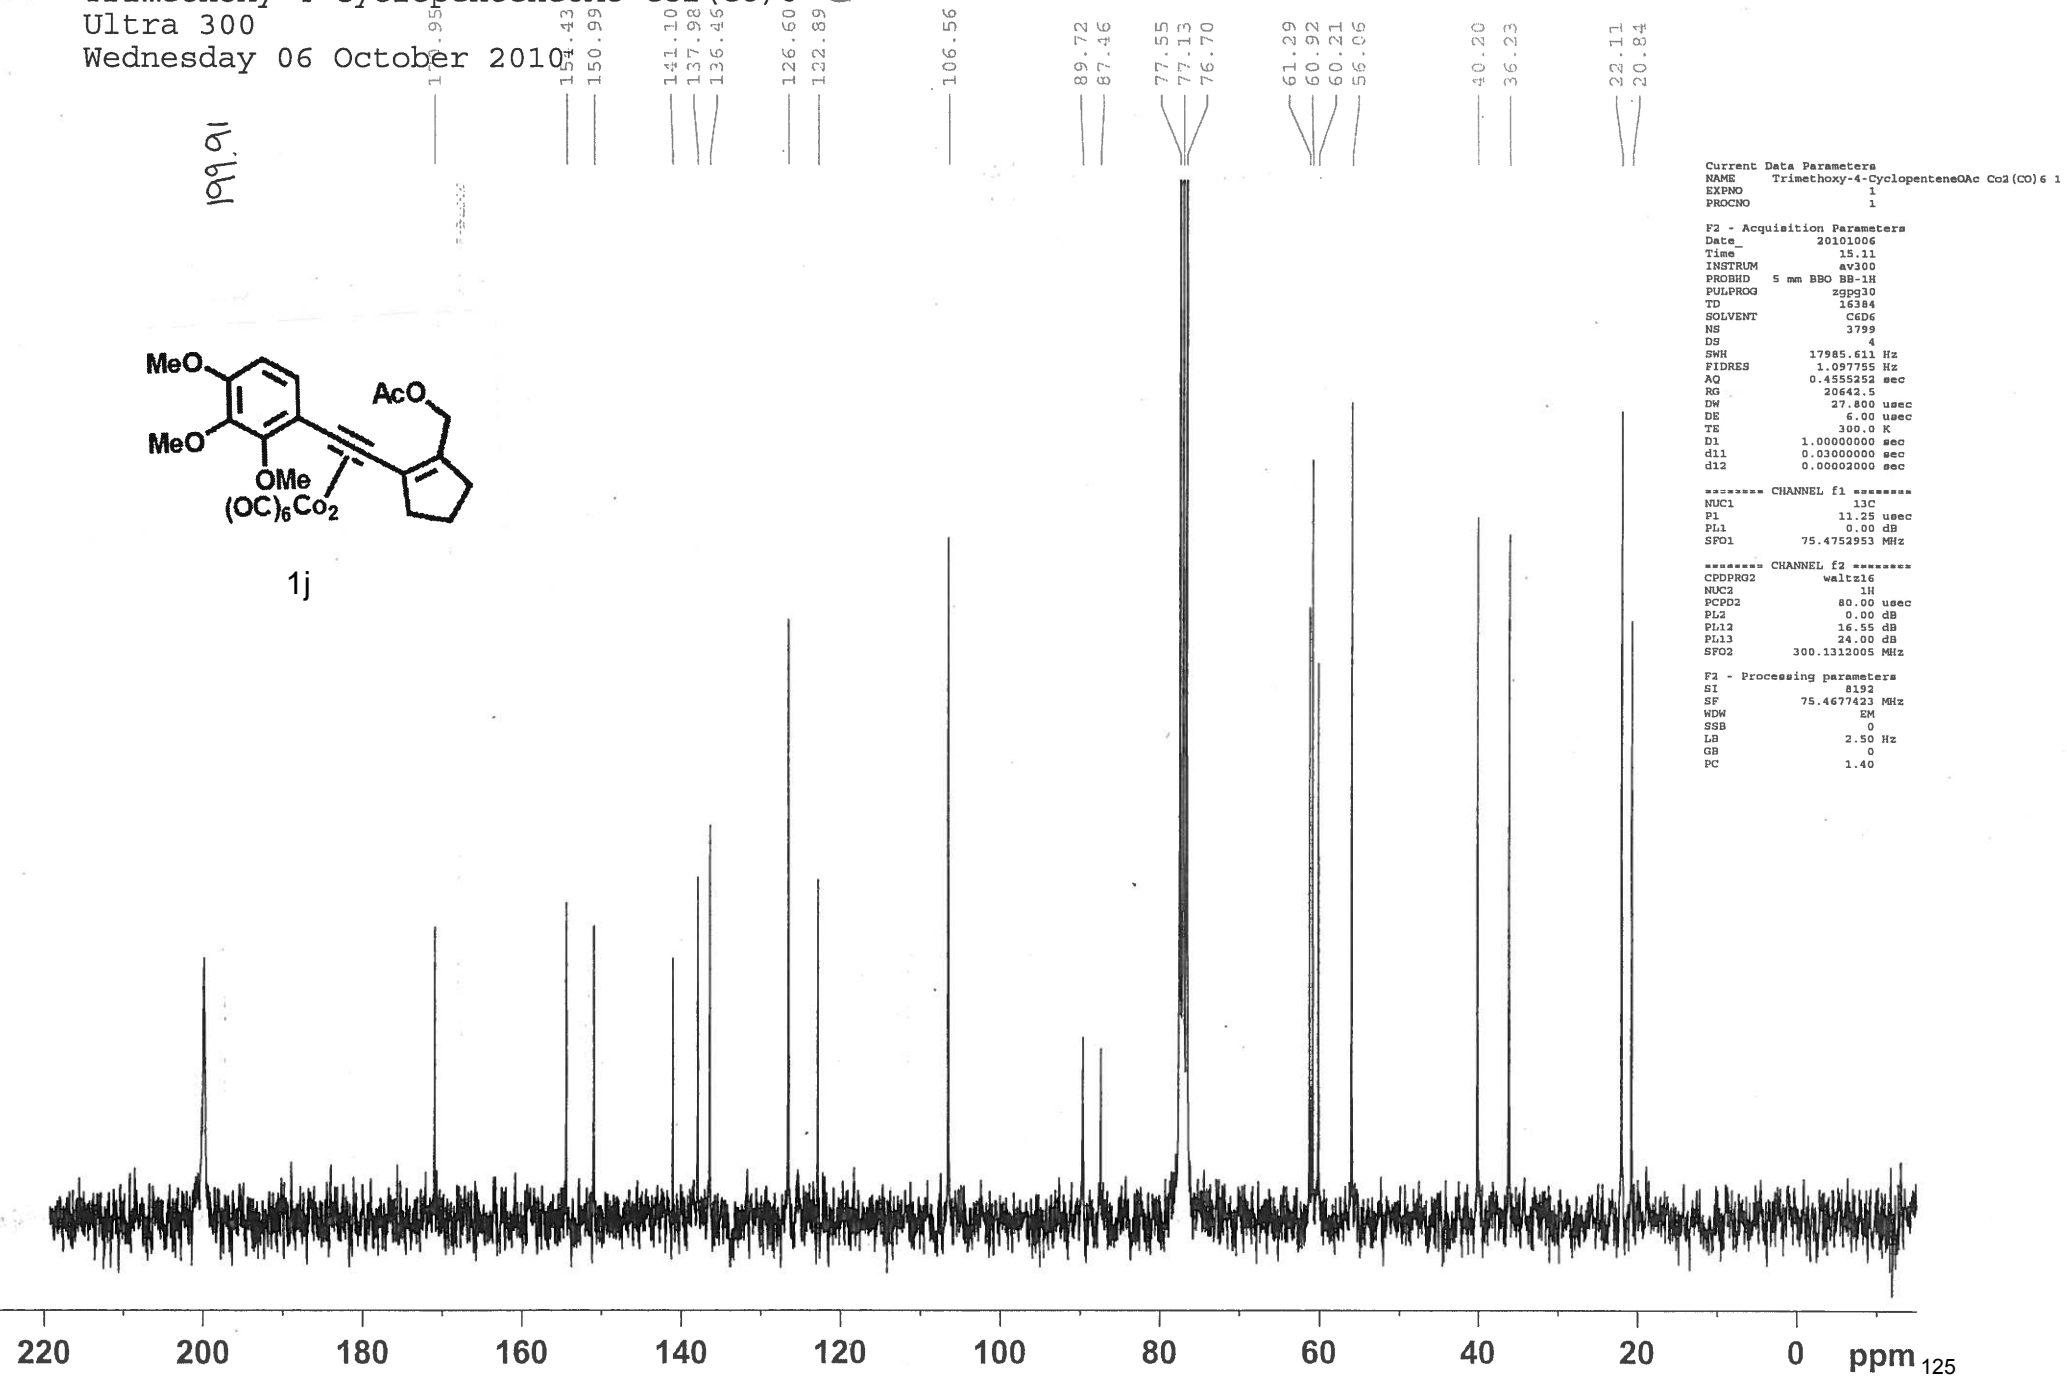

Current Data Parameters  
 NAME Trimethoxy-4-CyclopenteneOAc Co<sub>2</sub>(CO)<sub>6</sub> 1  
 EXPNO 1  
 PROCNO 1

F2 - Acquisition Parameters  
 Date\_ 20101006  
 Time 15.11  
 INSTRUM av300  
 PROBHD 5 mm BBO BB-1H  
 PULPROG zgpg30  
 TD 16384  
 SOLVENT CDCl<sub>3</sub>  
 NS 3799  
 DS 4  
 SWH 17985.611 Hz  
 FIDRES 1.097755 Hz  
 AQ 0.4555252 sec  
 RG 20642.5  
 DW 27.800 usec  
 DE 6.00 usec  
 TE 300.0 K  
 D1 1.00000000 sec  
 d11 0.03000000 sec  
 d12 0.00002000 sec

===== CHANNEL f1 =====  
 NUC1 <sup>13</sup>C  
 P1 11.25 usec  
 PL1 0.00 dB  
 SFO1 75.4752953 MHz

===== CHANNEL f2 =====  
 CPDPRG2 waltz16  
 NUC2 <sup>1</sup>H  
 PCPD2 80.00 usec  
 PL2 0.00 dB  
 PL12 16.55 dB  
 PL13 24.00 dB  
 SFO2 300.1312005 MHz

F2 - Processing parameters  
 SI 8192  
 SF 75.4677423 MHz  
 WDW EM  
 SSB 0  
 LB 2.50 Hz  
 GB 0  
 PC 1.40

Trimethoxy-4-CC-CyclohexeneOAc Co<sub>2</sub>(CO)<sub>6</sub>  
 Experiment 4 Topspin 500  
 Thursday 08 September 2011

7.269  
 7.144  
 7.126  
 6.646  
 6.628

4.527  
 3.947  
 3.896  
 3.840

2.389  
 2.377  
 2.140  
 2.128  
 2.116  
 1.941  
 1.774  
 1.763  
 1.750  
 1.736  
 1.724  
 1.712

Current Data Parameters  
 NAME Trimethoxy-4-CC-CyclohexeneOAc Co<sub>2</sub>(CO)<sub>6</sub>  
 EXPNO 4  
 PROCNO 1

F2 - Acquisition Parameters  
 Date 20110908  
 Time 16.27  
 INSTRUM spect  
 PROBHD 5 mm PABBO BB/  
 PULPROG zgpg30  
 TD 32768  
 SOLVENT C6D6  
 NS 8  
 DS 2  
 SWH 10964.912 Hz  
 FIDRES 0.334623 Hz  
 AQ 1.4942708 sec  
 RG 161.3  
 DW 45.600 usec  
 DE 6.50 usec  
 TE 294.2 K  
 D1 2.00000000 sec  
 d12 0.00002000 sec  
 D16 0.00020000 sec  
 TD0 1

===== CHANNEL f1 =====  
 NUC1 <sup>1</sup>H  
 P1 14.80 usec  
 p2 29.60 usec  
 P12 2000.00 usec  
 PL0 120.00 dB  
 FL1 -1.40 dB  
 SFO1 500.1305501 MHz  
 SP1 35.19 dB  
 SPNAM1 Squal100.1000  
 SFOAL1 0.500  
 SPOFFS1 0.00 Hz

===== GRADIENT CHANNEL =====  
 GPNAM1 SINE.100  
 GPNAM2 SINE.100  
 GPZ1 31.00 A  
 GPZ2 11.00 %  
 P16 1000.00 usec

F2 - Processing parameters  
 SI 32768  
 SF 500.1300192 MHz  
 WDW EM  
 SSB 0  
 LB 0.10 Hz  
 GB 0  
 PC 1.00

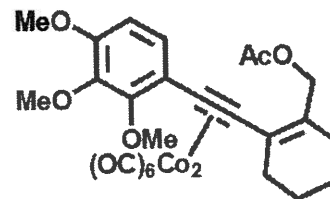

1k

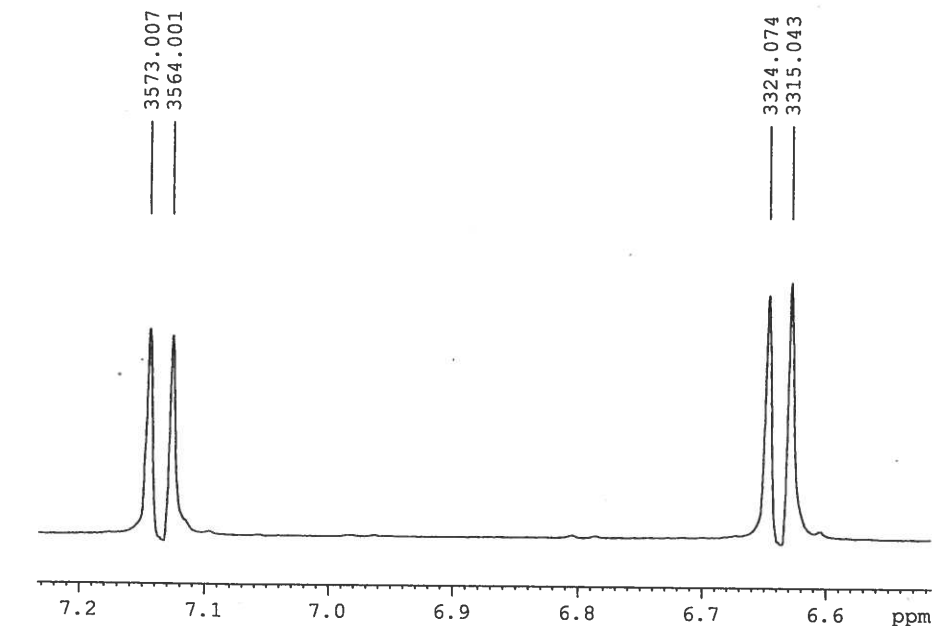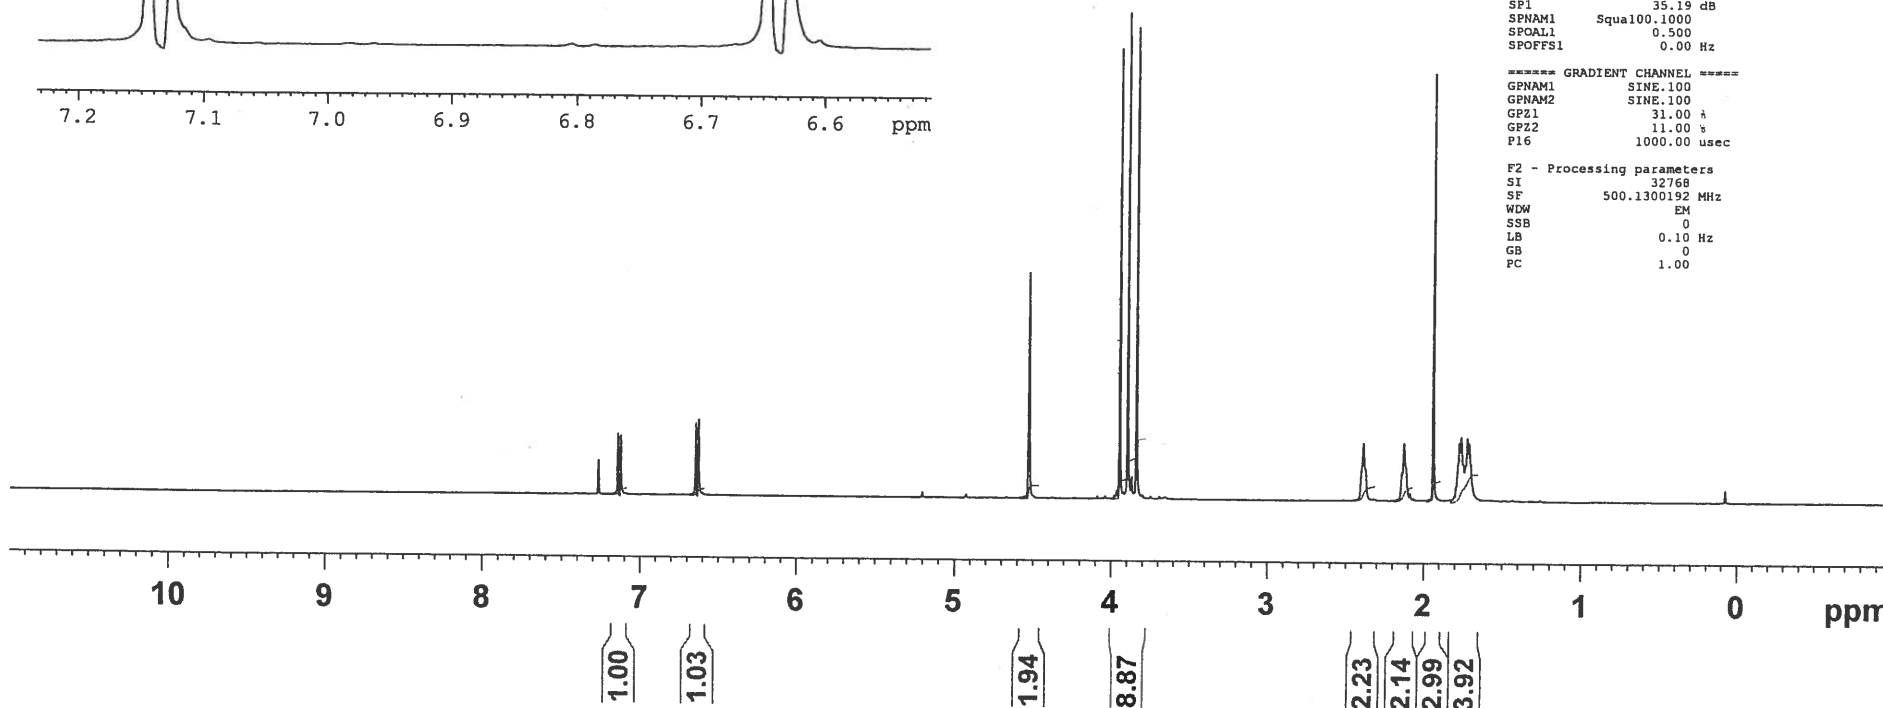

imethoxy-4-CC-CyclohexeneOAc Co<sub>2</sub>(CO)<sub>6</sub> 13C  
 periment 3 Ultra 300 Topspin  
 esday 24 January 2012

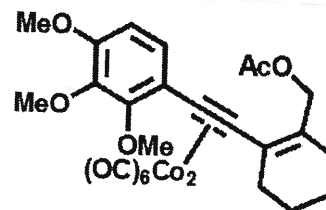

```

NAME Trimethoxy-4-CC-CyclohexeneOAc Co2(CO)6 13C
EXPNO 3
PROCNO 1
Date_ 20120124
Time 13.50
INSTRUM spect
PROBHD 5 mm PABBO BB-
PULPROG zgpg30
TD 16384
SOLVENT CDCl3
NS 118
DS 4
SWH 17085.611 Hz
FIDRES 1.097755 Hz
AQ 0.4555252 sec
RG 70642.5
DW 27.800 usec
DE 6.00 usec
TE 294.4 K
D1 1.00000000 sec
D11 0.03000000 sec
TD0 1
  
```

```

===== CHANNEL f1 =====
NUC1 13C
P1 11.25 usec
PL1 0.00 dB
SF01 75.4752953 MHz
  
```

```

===== CHANNEL f2 =====
CPDPRG2 waltz16
NUC2 1H
PCPD2 80.00 usec
PL2 0.00 dB
PL12 18.55 dB
PL13 24.00 dB
SF02 300.142605 MHz
SI 8192
SF 75.4677423 MHz
WDW EM
SSB 0
LB 2.50 Hz
GB 0
PC 1.40
  
```

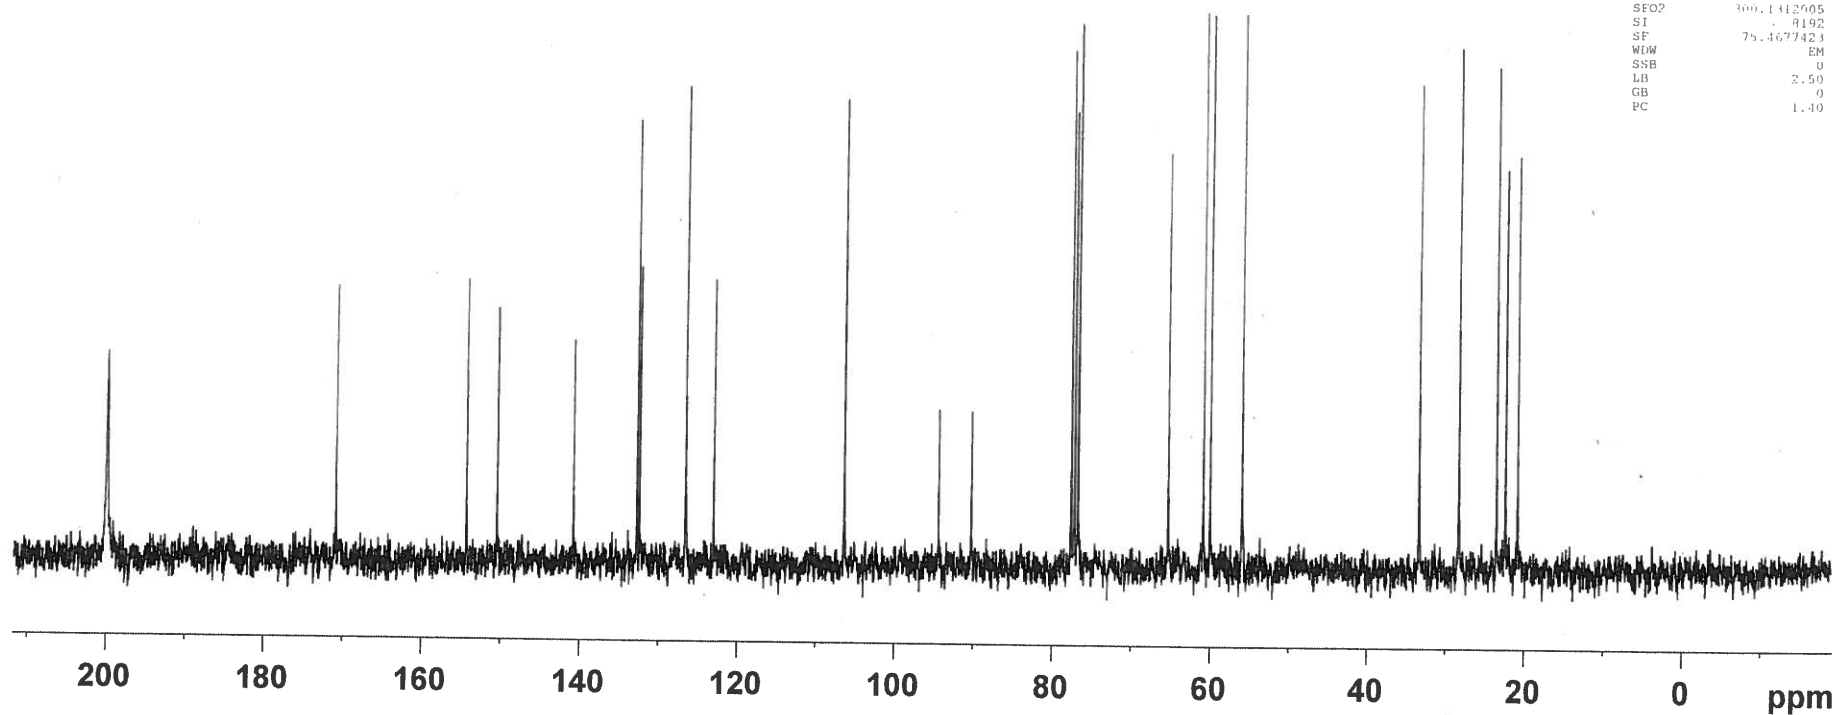

Trimethoxy-4-CC-CyclohexeneMeOAc Co<sub>2</sub>(CO)<sub>6</sub>  
 500 Topsin Experiment 2  
 11 September 2009

Current Data Parameters

NAME Trimethoxy-4-CC-CyclohexeneMeOAc Co<sub>2</sub>(CO)<sub>6</sub>  
 EXPNO 2  
 PROCNO 1

F2 - Acquisition Parameters

Date\_ 20090911  
 Time 14.16  
 INSTRUM spect  
 PROBHD 5 mm PABBO BB/  
 PULPROG zg30  
 TD 65536  
 SOLVENT CDCl<sub>3</sub>  
 NS 8  
 DS 2  
 SWH 10330.578 Hz  
 FIDRES 0.157632 Hz  
 AQ 3.1719923 sec  
 RG 114  
 DW 48.400 usec  
 DE 6.50 usec  
 TE 296.2 K  
 D1 1.00000000 sec  
 TDO 1

===== CHANNEL f1 =====

NUC1 1H  
 P1 15.00 usec  
 PL1 0.50 dB  
 SFO1 500.1330885 MHz

F2 - Processing parameters

SI 32768  
 SF 500.1300192 MHz  
 WDW no  
 SSB 0  
 LB 0.00 Hz  
 GB 0  
 PC 1.00

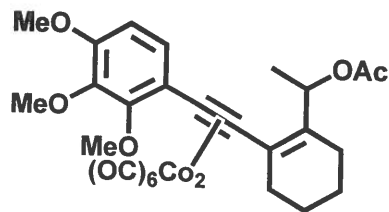

1kk

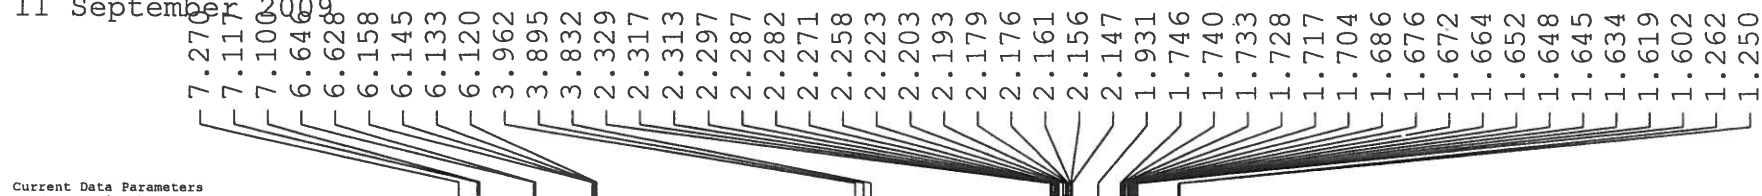

3559.473  
 3550.781

3323.688  
 3314.955

3079.715  
 3073.405  
 3067.066  
 3060.752

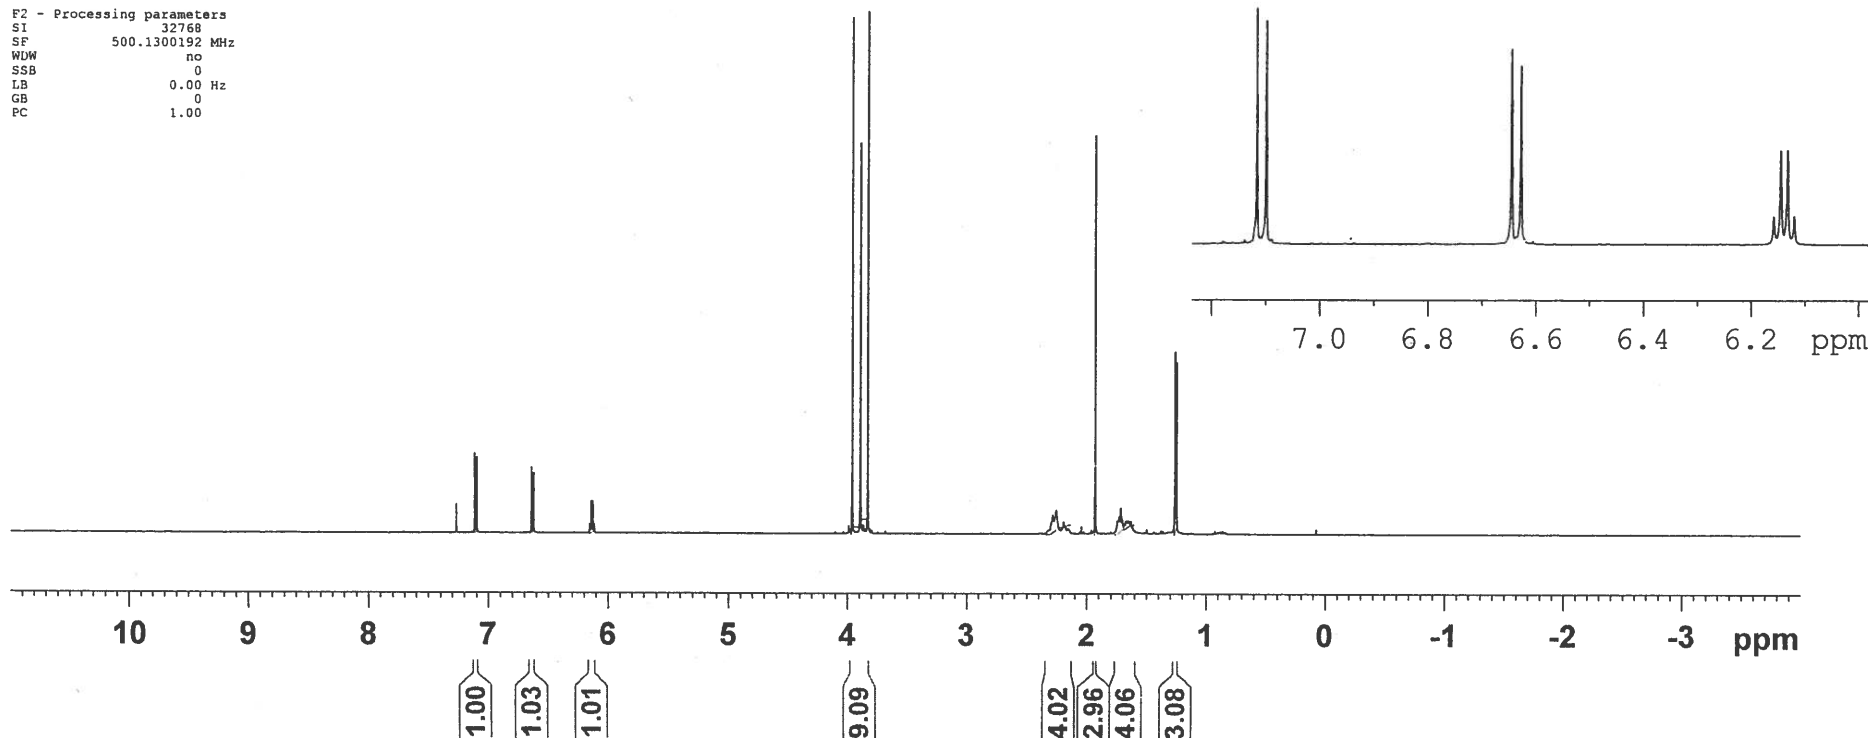

Trimethoxybenzene-4-CC-Cyclohexene-Me-OAc Co<sub>2</sub>(CO)<sub>6</sub> <sup>13</sup>C  
 300 Ultra Experiment 2  
 13 September 2009

200.11

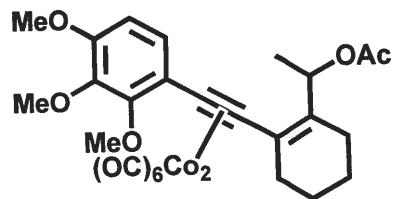

1kk

|        |        |        |        |        |        |        |        |        |       |       |       |       |       |       |       |       |       |       |       |       |       |       |       |
|--------|--------|--------|--------|--------|--------|--------|--------|--------|-------|-------|-------|-------|-------|-------|-------|-------|-------|-------|-------|-------|-------|-------|-------|
| 170.02 | 154.16 | 150.16 | 140.88 | 137.40 | 130.23 | 126.56 | 123.65 | 106.26 | 93.19 | 92.78 | 77.57 | 77.15 | 76.73 | 70.58 | 60.88 | 59.59 | 56.02 | 32.99 | 24.49 | 23.55 | 22.41 | 21.33 | 16.27 |
|--------|--------|--------|--------|--------|--------|--------|--------|--------|-------|-------|-------|-------|-------|-------|-------|-------|-------|-------|-------|-------|-------|-------|-------|

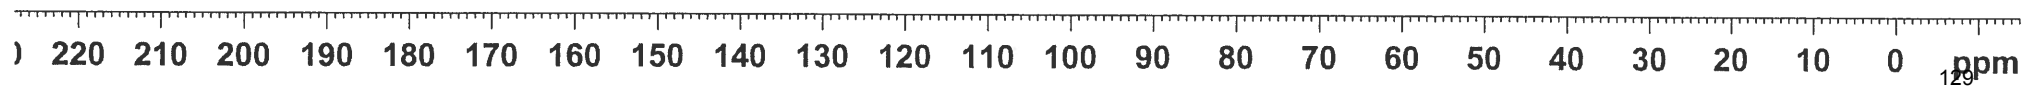

Trimethoxy-5-CC-CyclopenteneOAc Co<sub>2</sub>(CO)<sub>6</sub>  
 Experiment 2  
 Topsin 500  
 Thursday 24 June 2010

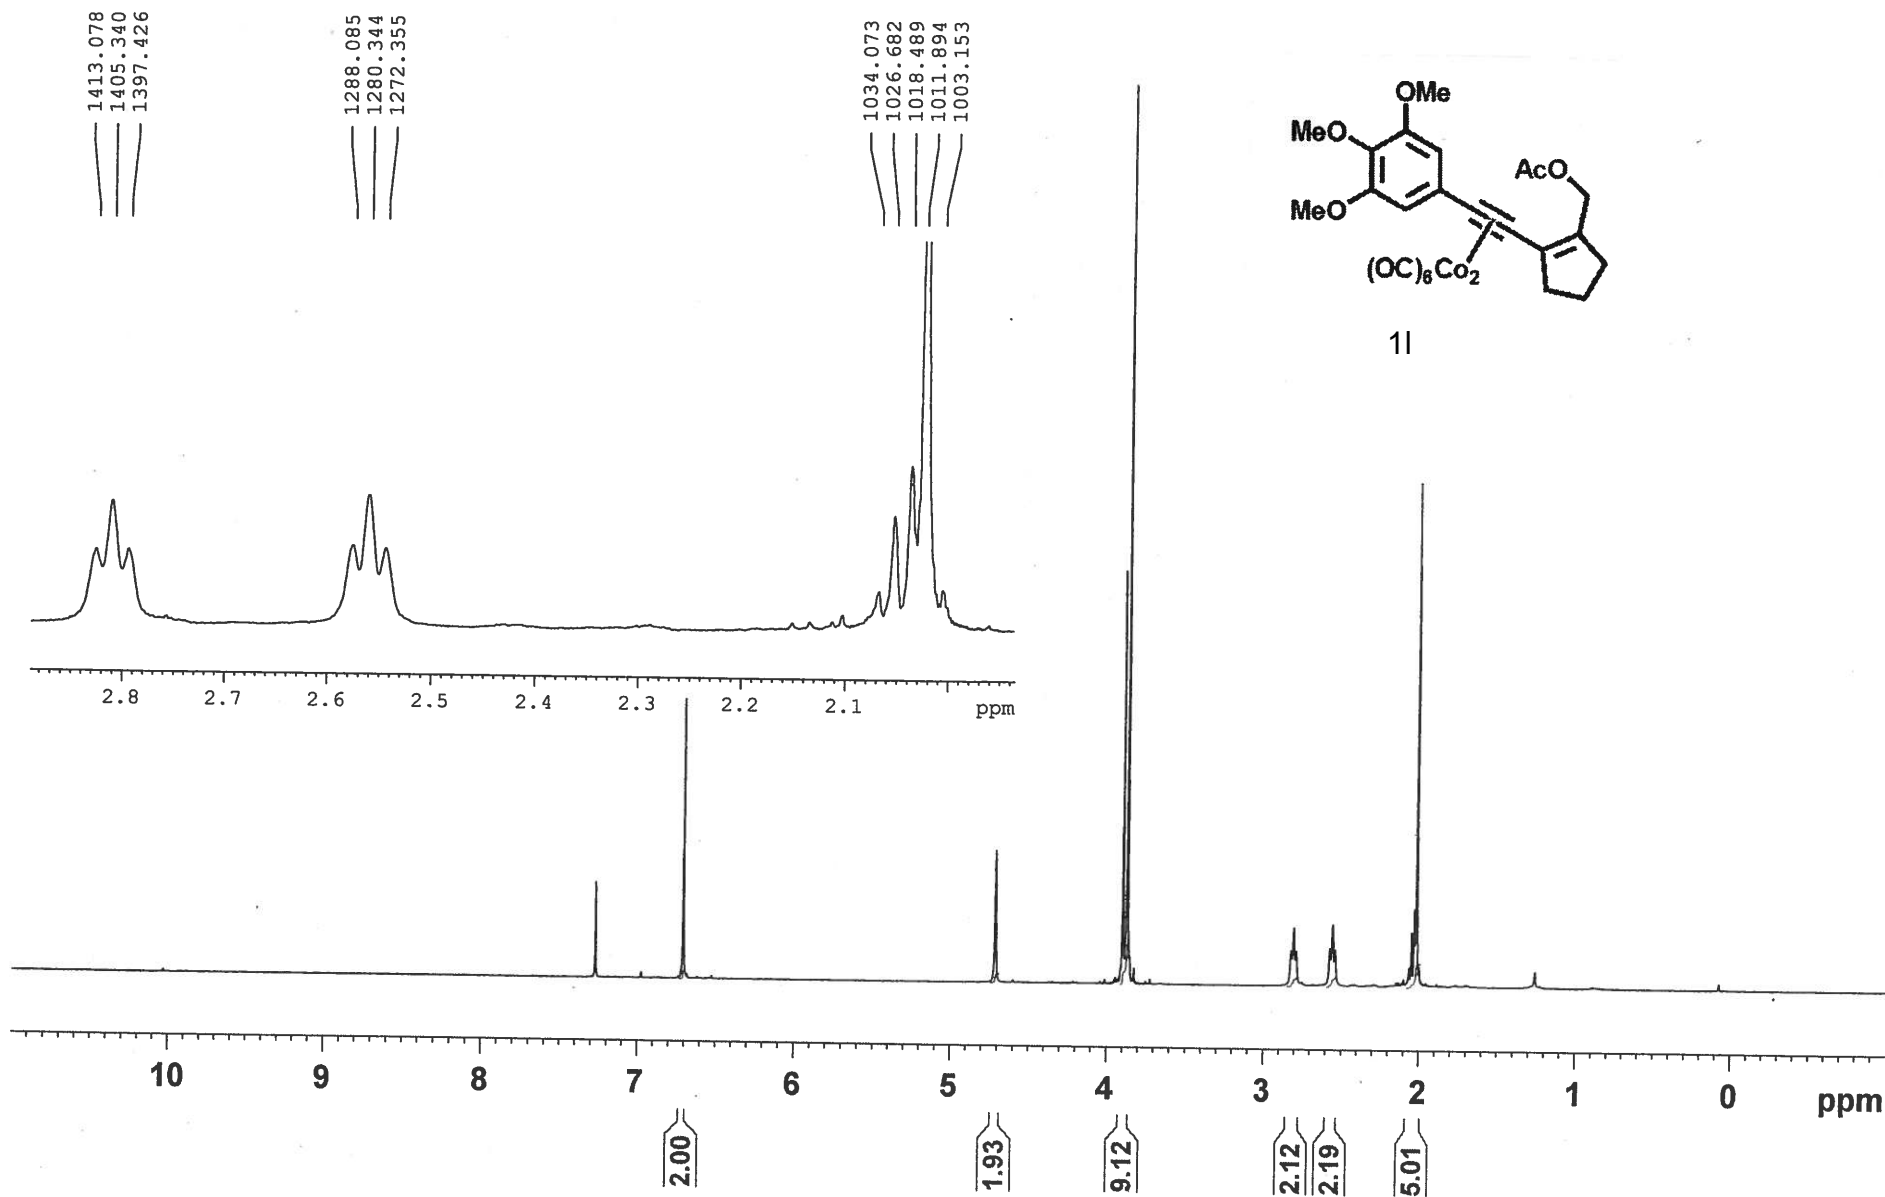

imethoxy-5-CC-CyclopenteneOAc Co<sub>2</sub>(CO)<sub>6</sub> <sup>13</sup>C  
 periment 2 Topspin Ultra 300  
 esday 18 October 2011

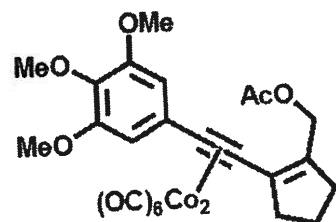

11

NAME Trimethoxy-5-CC-CyclopenteneOAc Co<sub>2</sub>(CO)<sub>6</sub> <sup>13</sup>C  
 EXPRO 2  
 PROCNO 1  
 Date 20111018  
 Time 12.37  
 INSTRUM spect  
 PROBHD 5 mm PABBO BB-  
 PULPROG zgpg30  
 TD 1384  
 SOLVENT CDCl<sub>3</sub>  
 NS 803  
 DS 4  
 SWH 17985.611 Hz  
 FIDRES 1.097755 Hz  
 AQ 0.4555252 sec  
 RG 30642.5  
 DW 27.800 usec  
 DE 6.00 usec  
 TE 293.2 K  
 D1 1.00006000 sec  
 D11 0.03009000 sec  
 TDO 1

===== CHANNEL f1 =====  
 NUC1 <sup>13</sup>C  
 P1 11.25 usec  
 PL1 0.00 dB  
 SFO1 75.4762651 MHz

===== CHANNEL f2 =====  
 CPDPRG2 waltz16  
 NUC2 <sup>1</sup>H  
 PCPD2 80.00 usec  
 PL2 0.00 dB  
 PL12 19.55 dB  
 PL13 24.00 dB  
 SFO2 400.1312005 MHz  
 S1 815.2  
 SF 75.4277423 MHz  
 WDW EM  
 SSB 0  
 LB 2.50 Hz  
 GB 0  
 PC 1.40

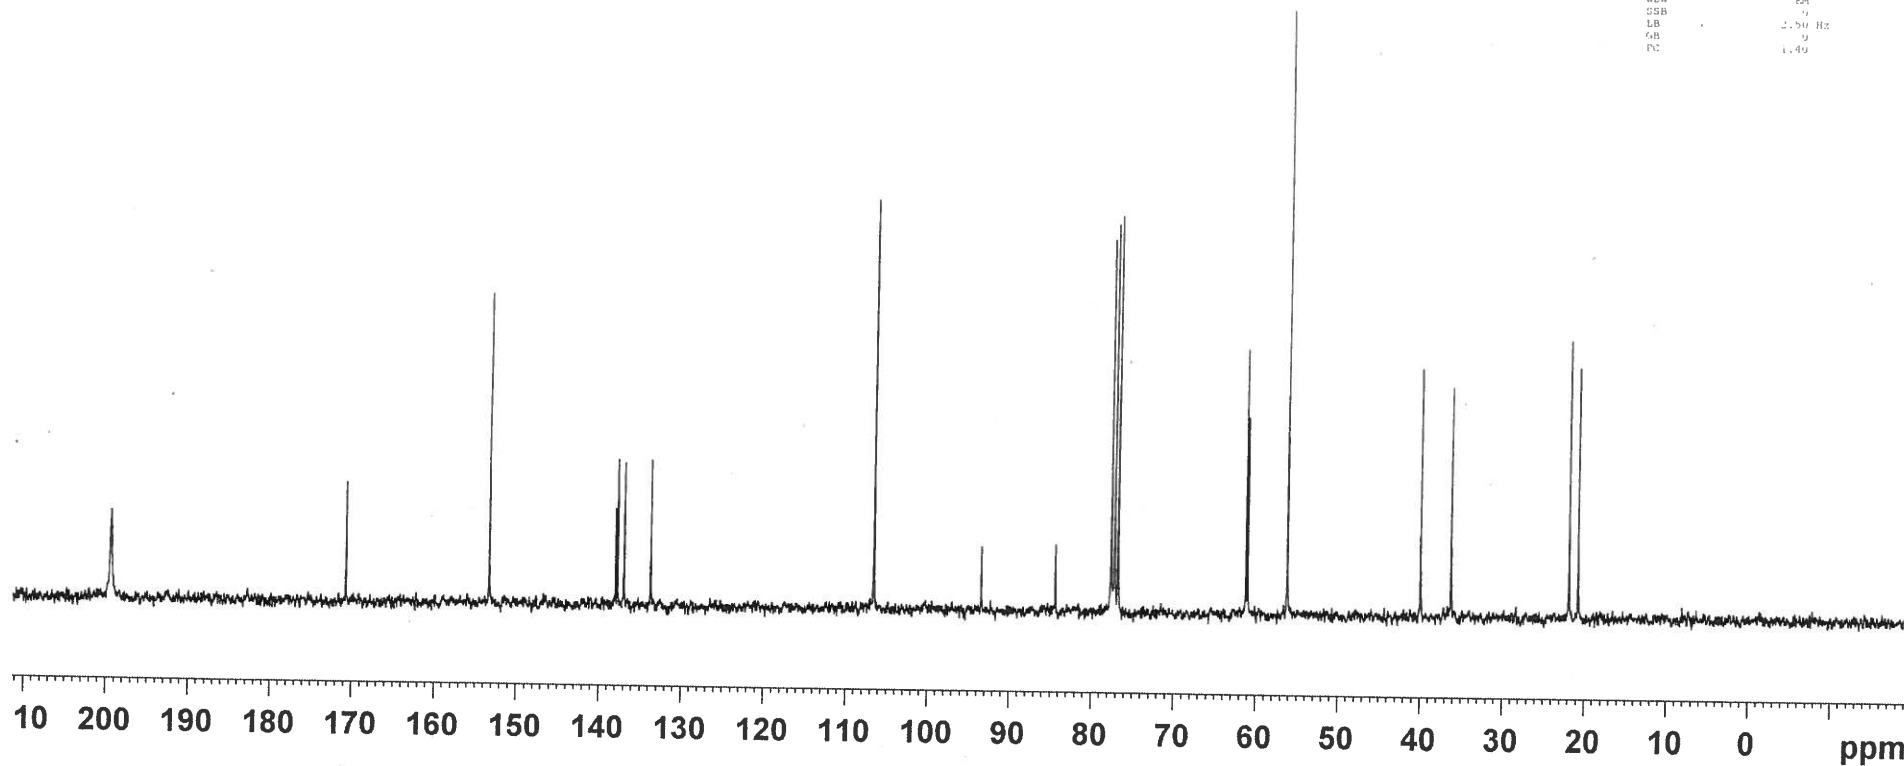

Trimethoxy-5-CC-CyclohexeneOAc Co<sub>2</sub>(CO)<sub>6</sub>  
 Topsin 500  
 Experiment 8  
 23 June 2010

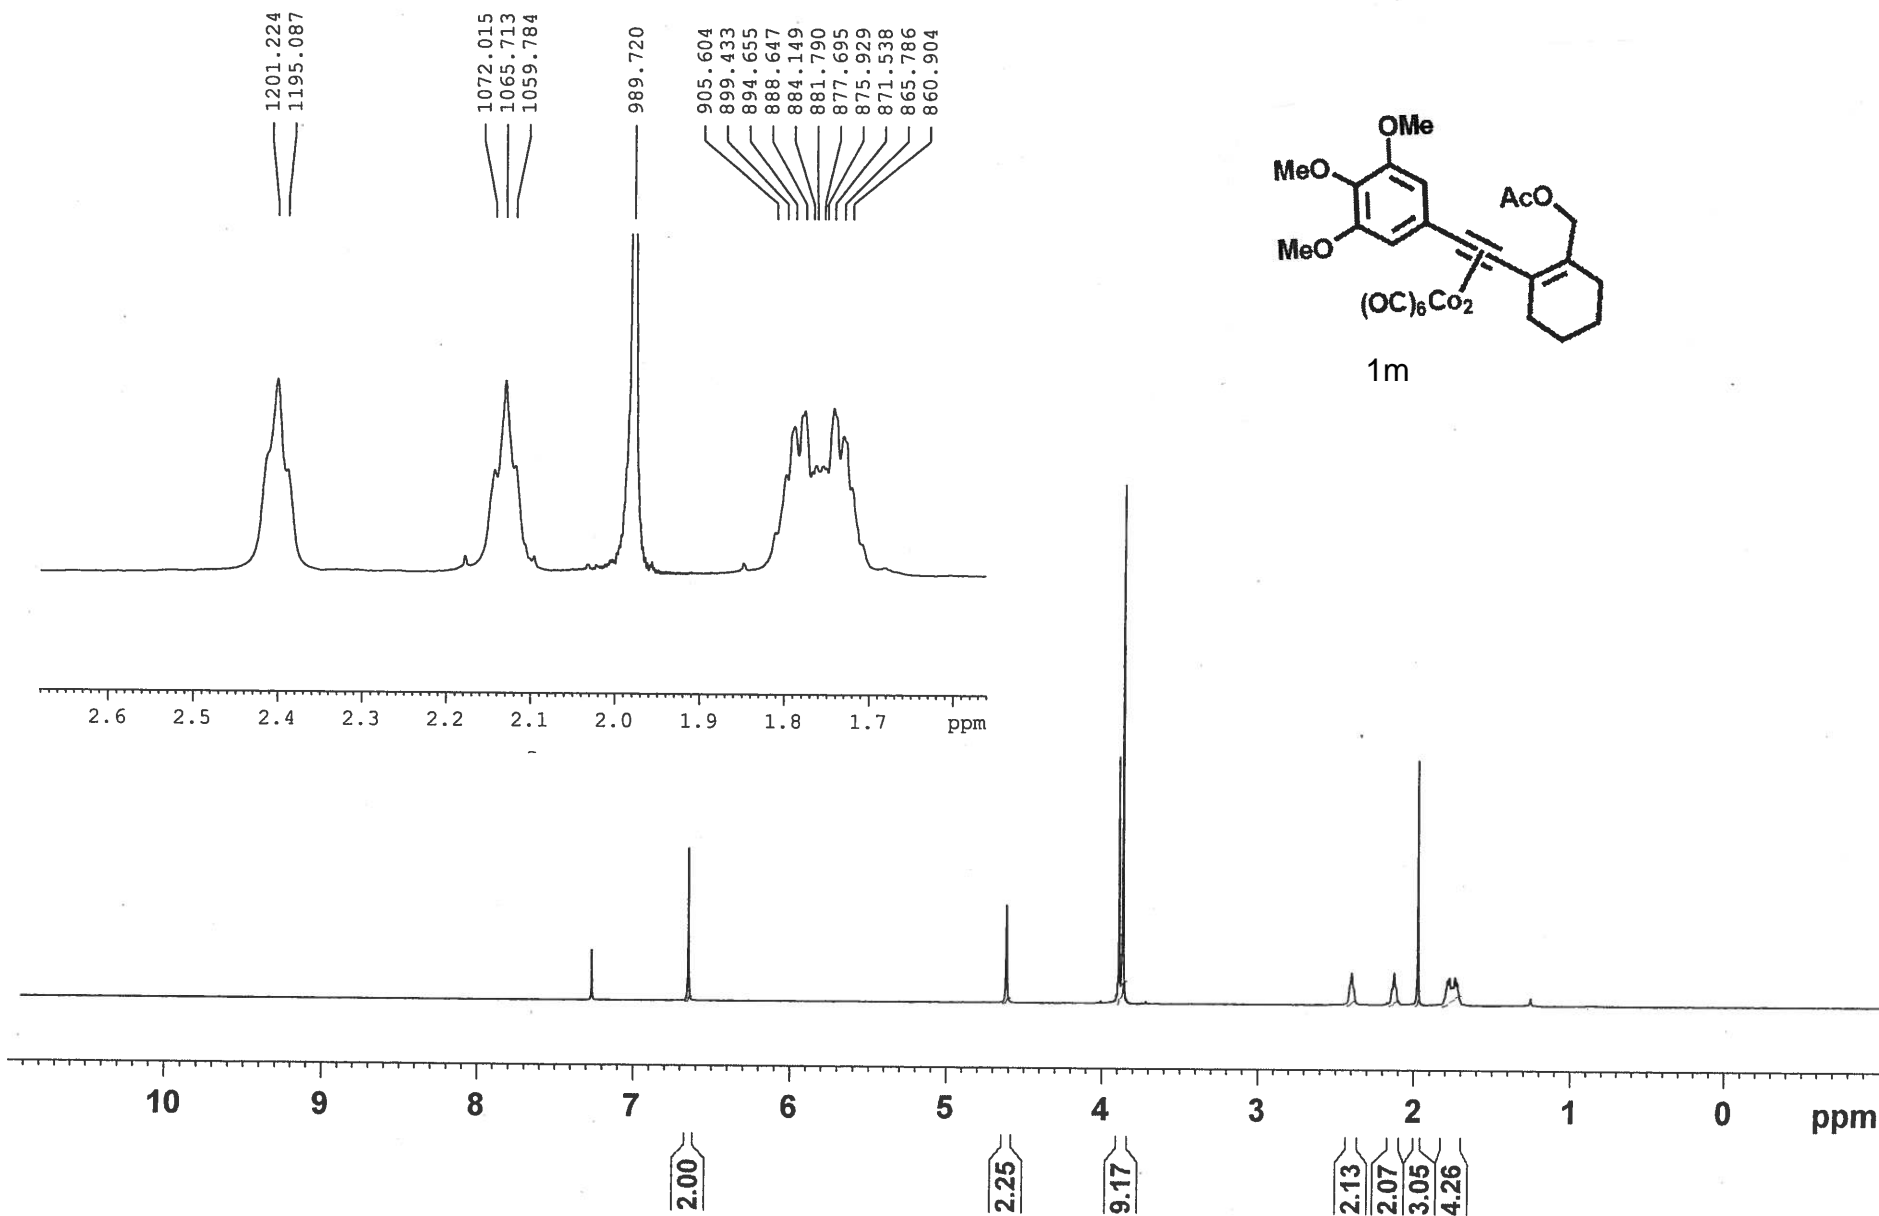



Trimethoxy-5-CyclohexeneOAc-Co2(CO)6-13C  
 Experiment 4  
 300 Ultra  
 24 June 2010

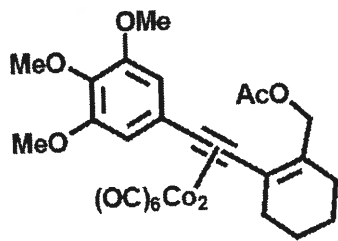

1m

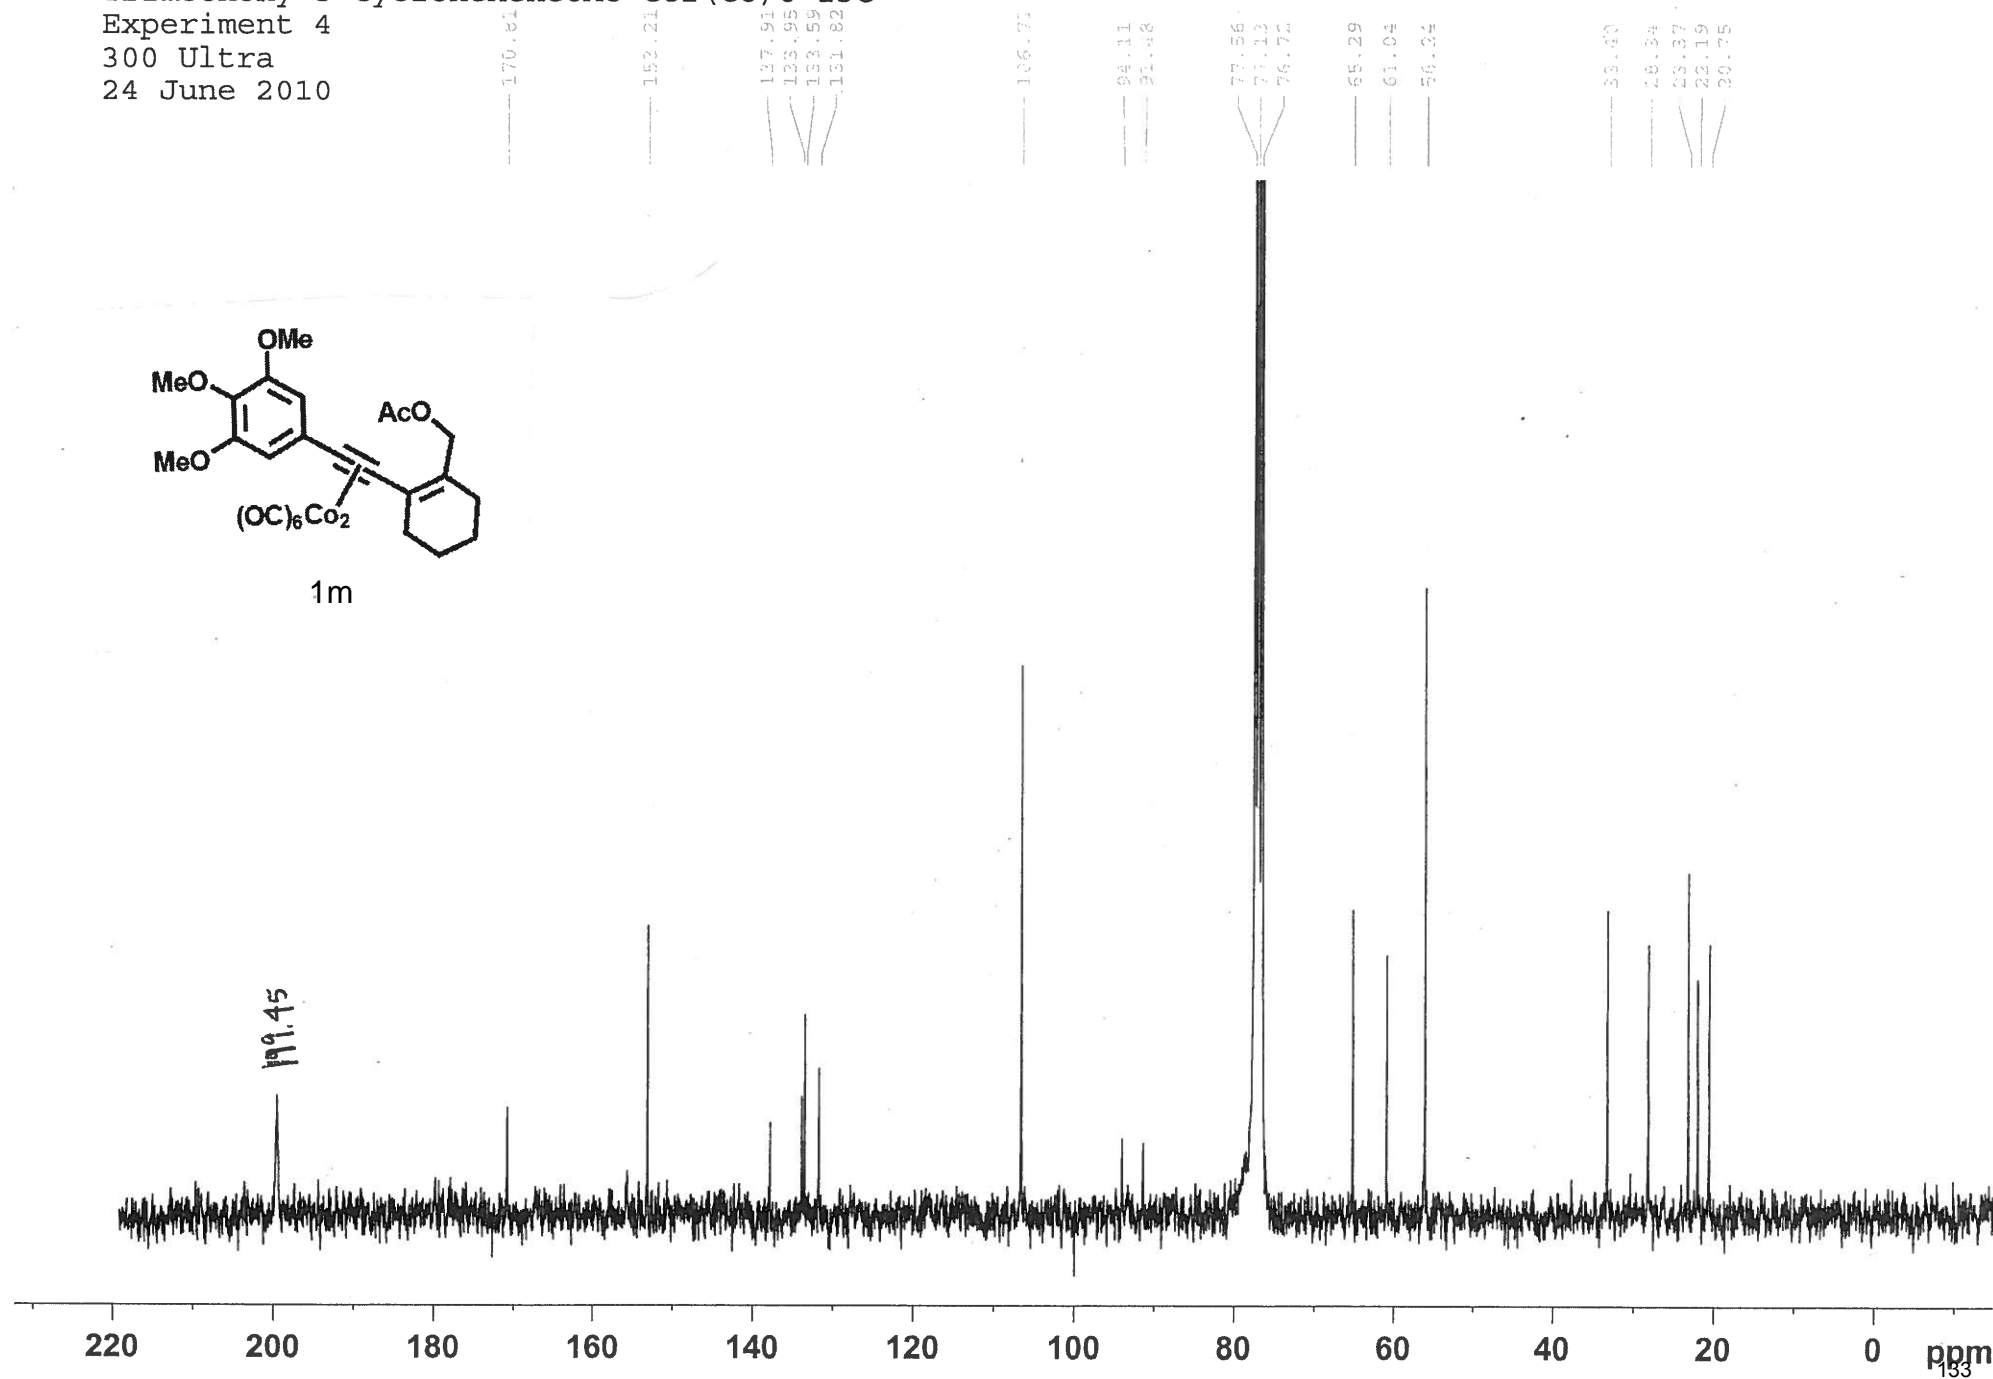

Trimethoxy-5-CC-CyclohexeneOAc-Ph Co2(CO)6

Experiment 3

Topsin 500

Wednesday 18 August 2010

7.270 7.195 7.188 7.182 7.175 6.937 6.891 6.883 6.875 6.872 6.362 3.850 3.697 2.503 2.493 2.477 2.089 2.048 2.045 2.038 2.029 2.001 1.883 1.875 1.870 1.864 1.858 1.852 1.846 1.832 1.816 1.806 1.802 1.791 1.779 1.762 1.757 1.750 1.737 1.733 1.724 1.720 1.712 1.700 1.662 1.657 1.651 1.645 1.638 1.633 1.626 1.620 1.613 1.607 1.603

3598.533  
3595.111  
3592.059  
3588.182

3469.479

3446.292  
3442.391  
3438.665  
3436.650

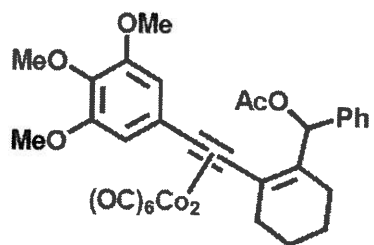

1mm

Current Data Parameters  
NAME Trimethoxy-5-CC-CyclohexeneOAc-Ph Co2(CO)6  
EXPNO 3  
PROCNO 1

F2 - Acquisition Parameters  
Date 20100818  
Time 11.50  
INSTRUM spect  
PROBHD 5 mm PABBO BB/  
PULPROG zgpg30  
TD 32768  
SOLVENT H2O  
NS 8  
DS 2  
SWH 10964.912 Hz  
FIDRES 0.334623 Hz  
AQ 1.4942708 sec  
RG 114  
DW 45.600 usec  
DE 6.50 usec  
TE 294.2 K  
d1 2.00000000 sec  
d12 0.00020000 sec  
d16 0.00020000 sec  
TDO 1

----- CHANNEL f1 -----  
NUC1 1H  
P1 14.80 usec  
P2 29.60 usec  
P12 2000.00 usec  
PL0 120.00 dB  
PL1 -1.40 dB  
SFO1 500.1305001 MHz  
SP1 35.19 dB  
SFOAM1 Squal100.1000  
SFOAL1 0.500  
SFOFFS1 0.00 Hz

----- GRADIENT CHANNEL -----  
GPNAM1 SINE.100  
GPNAM2 SINE.100  
GPZ1 31.00 %  
GPZ2 11.00 %  
P16 1000.00 usec

F2 - Processing parameters  
SI 32768  
SF 500.1300187 MHz  
WDW EM  
SSB 0  
LB 0.40 Hz  
GB 0  
PC 1.00

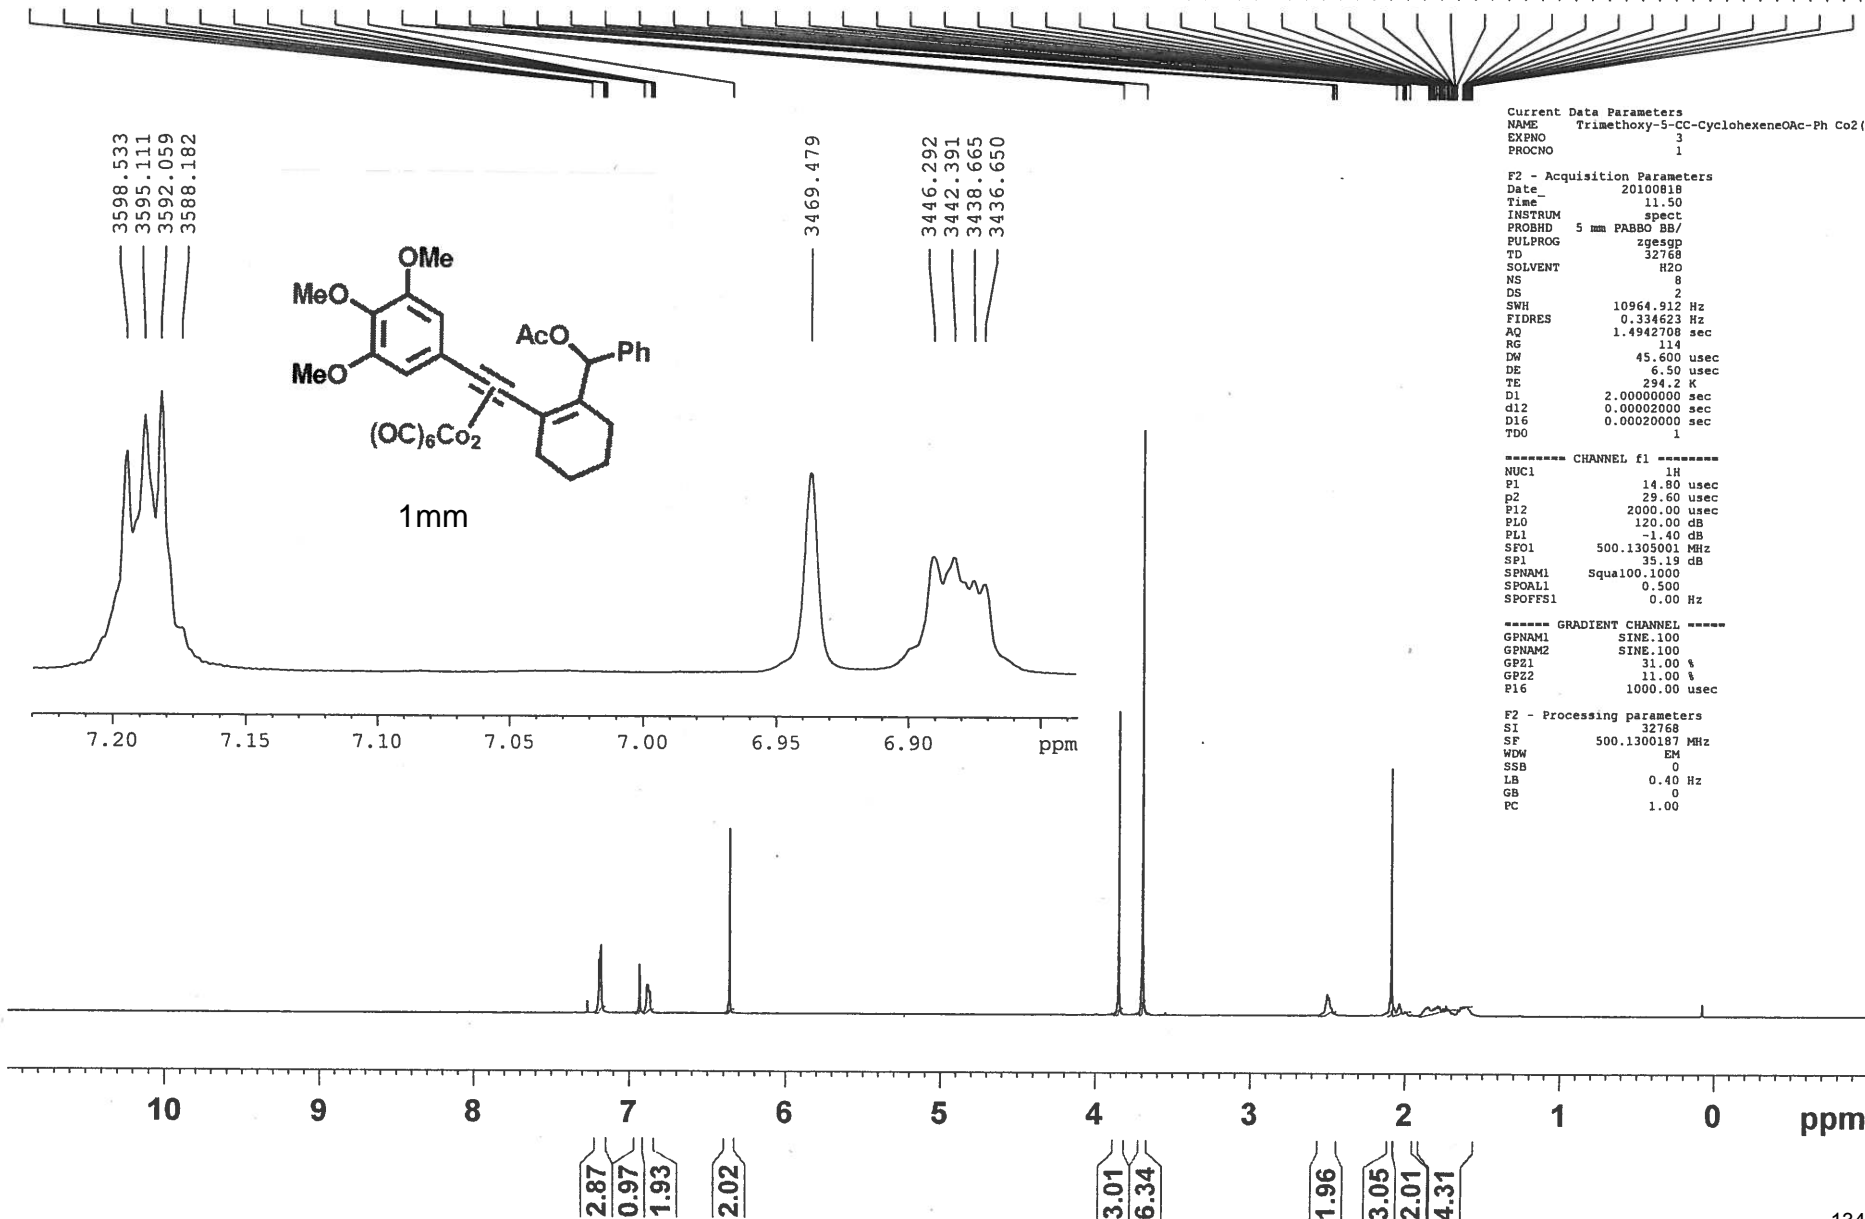

Trimethoxy-5-CC-CyclohexeneOAc-Ph Co<sub>2</sub>(CO)<sub>6</sub>  
 Experiment 2  
 Ultra 300  
 Thursday 19 August 2010

199.74

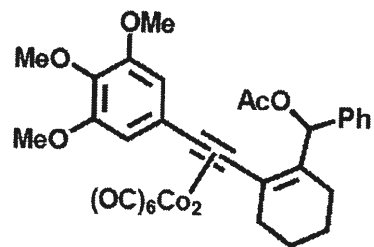

1mm

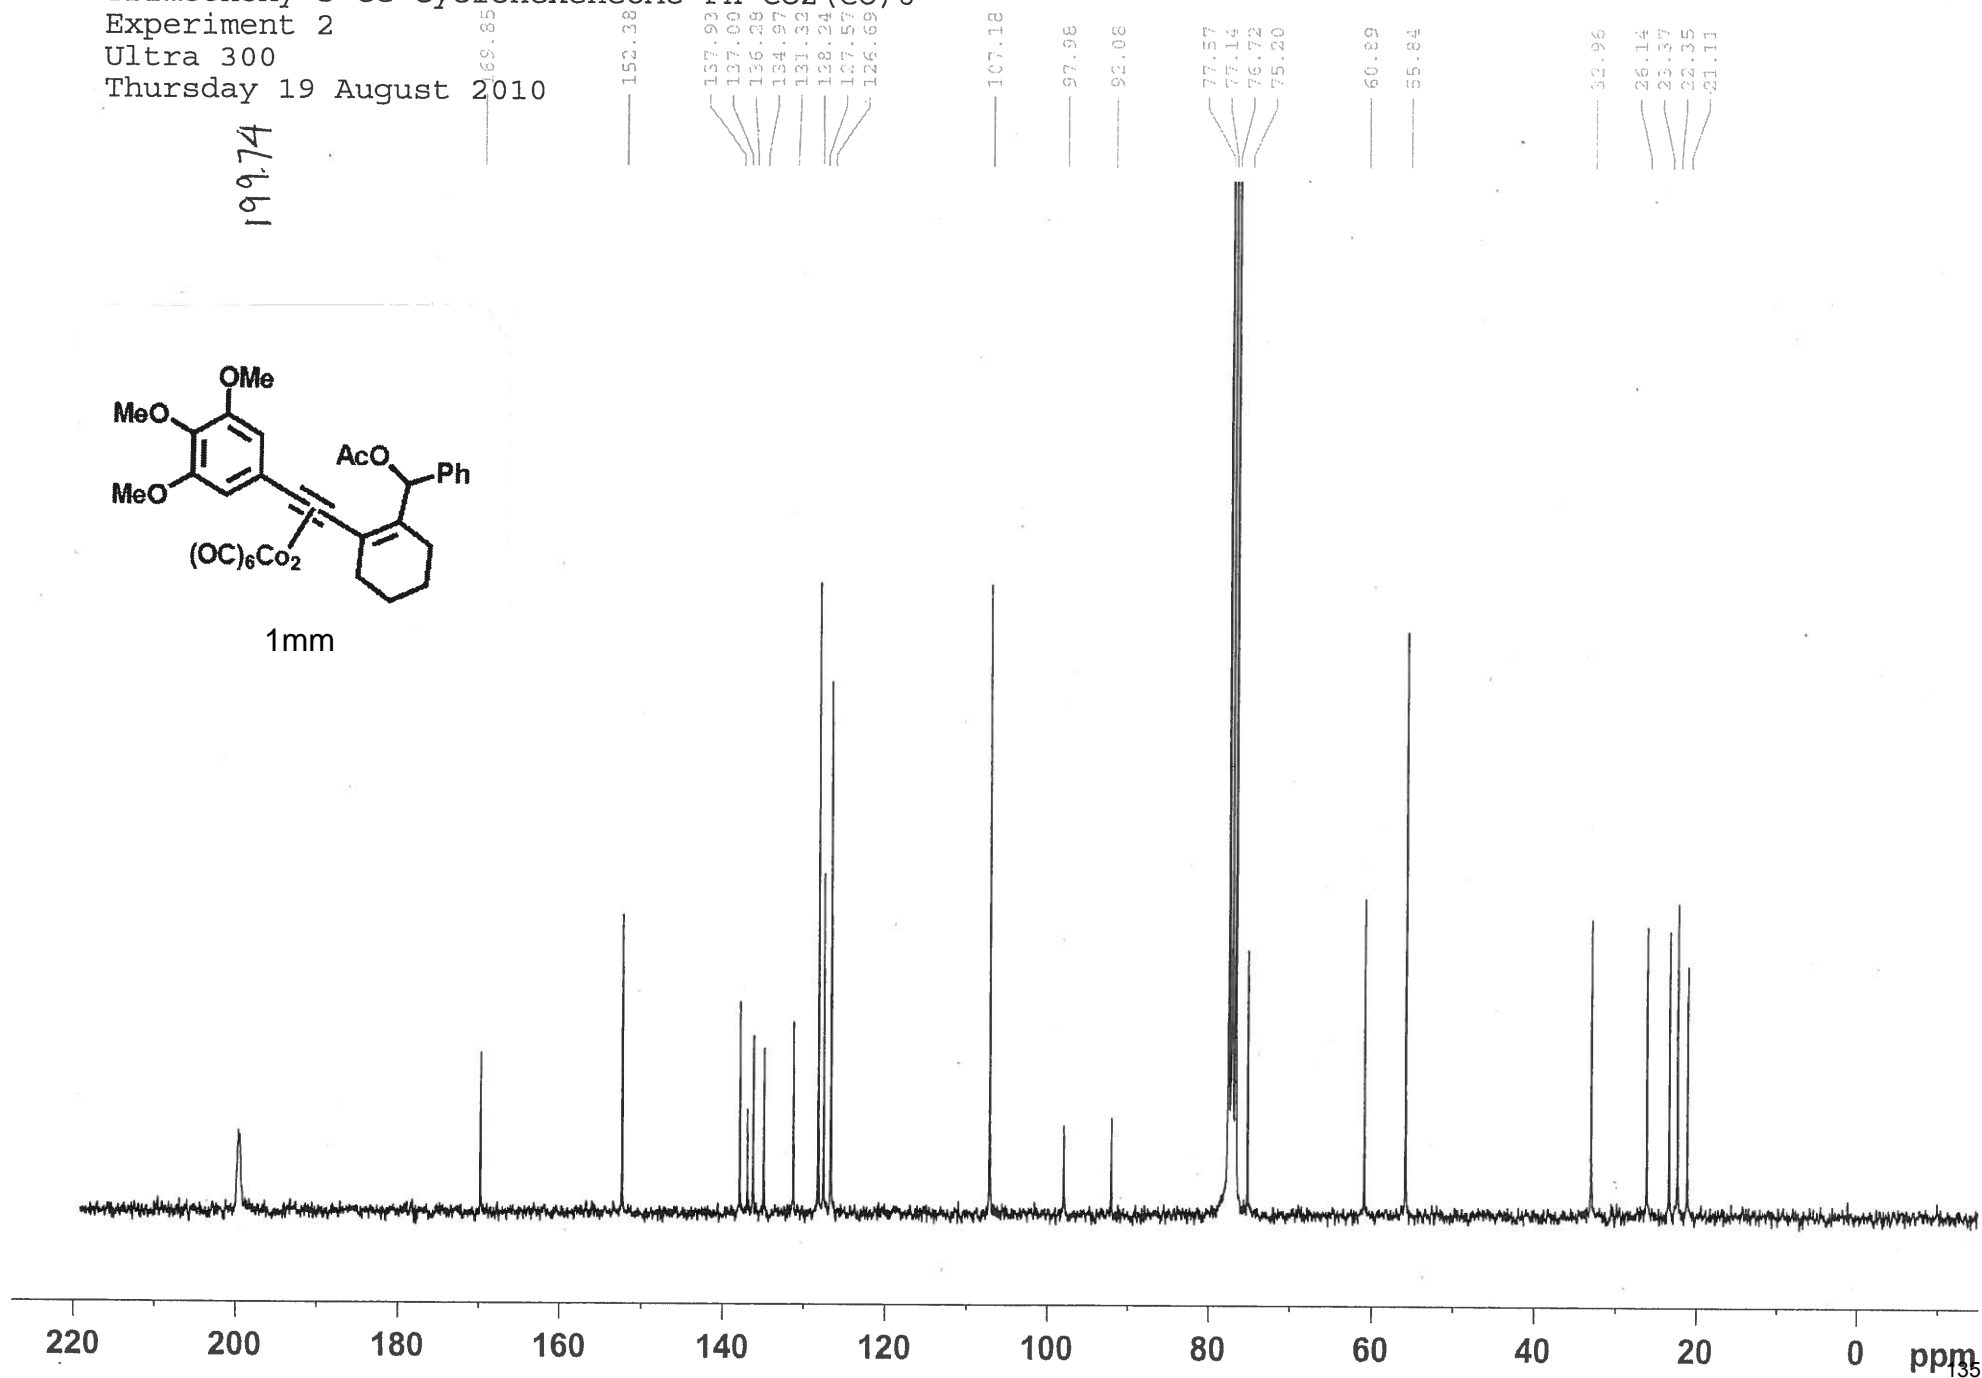

Trimethoxy-5-CC-CyclohepteneOAc Co2(CO)6  
 Topspin 500 Experiment 2  
 Wednesday 25 May 2011

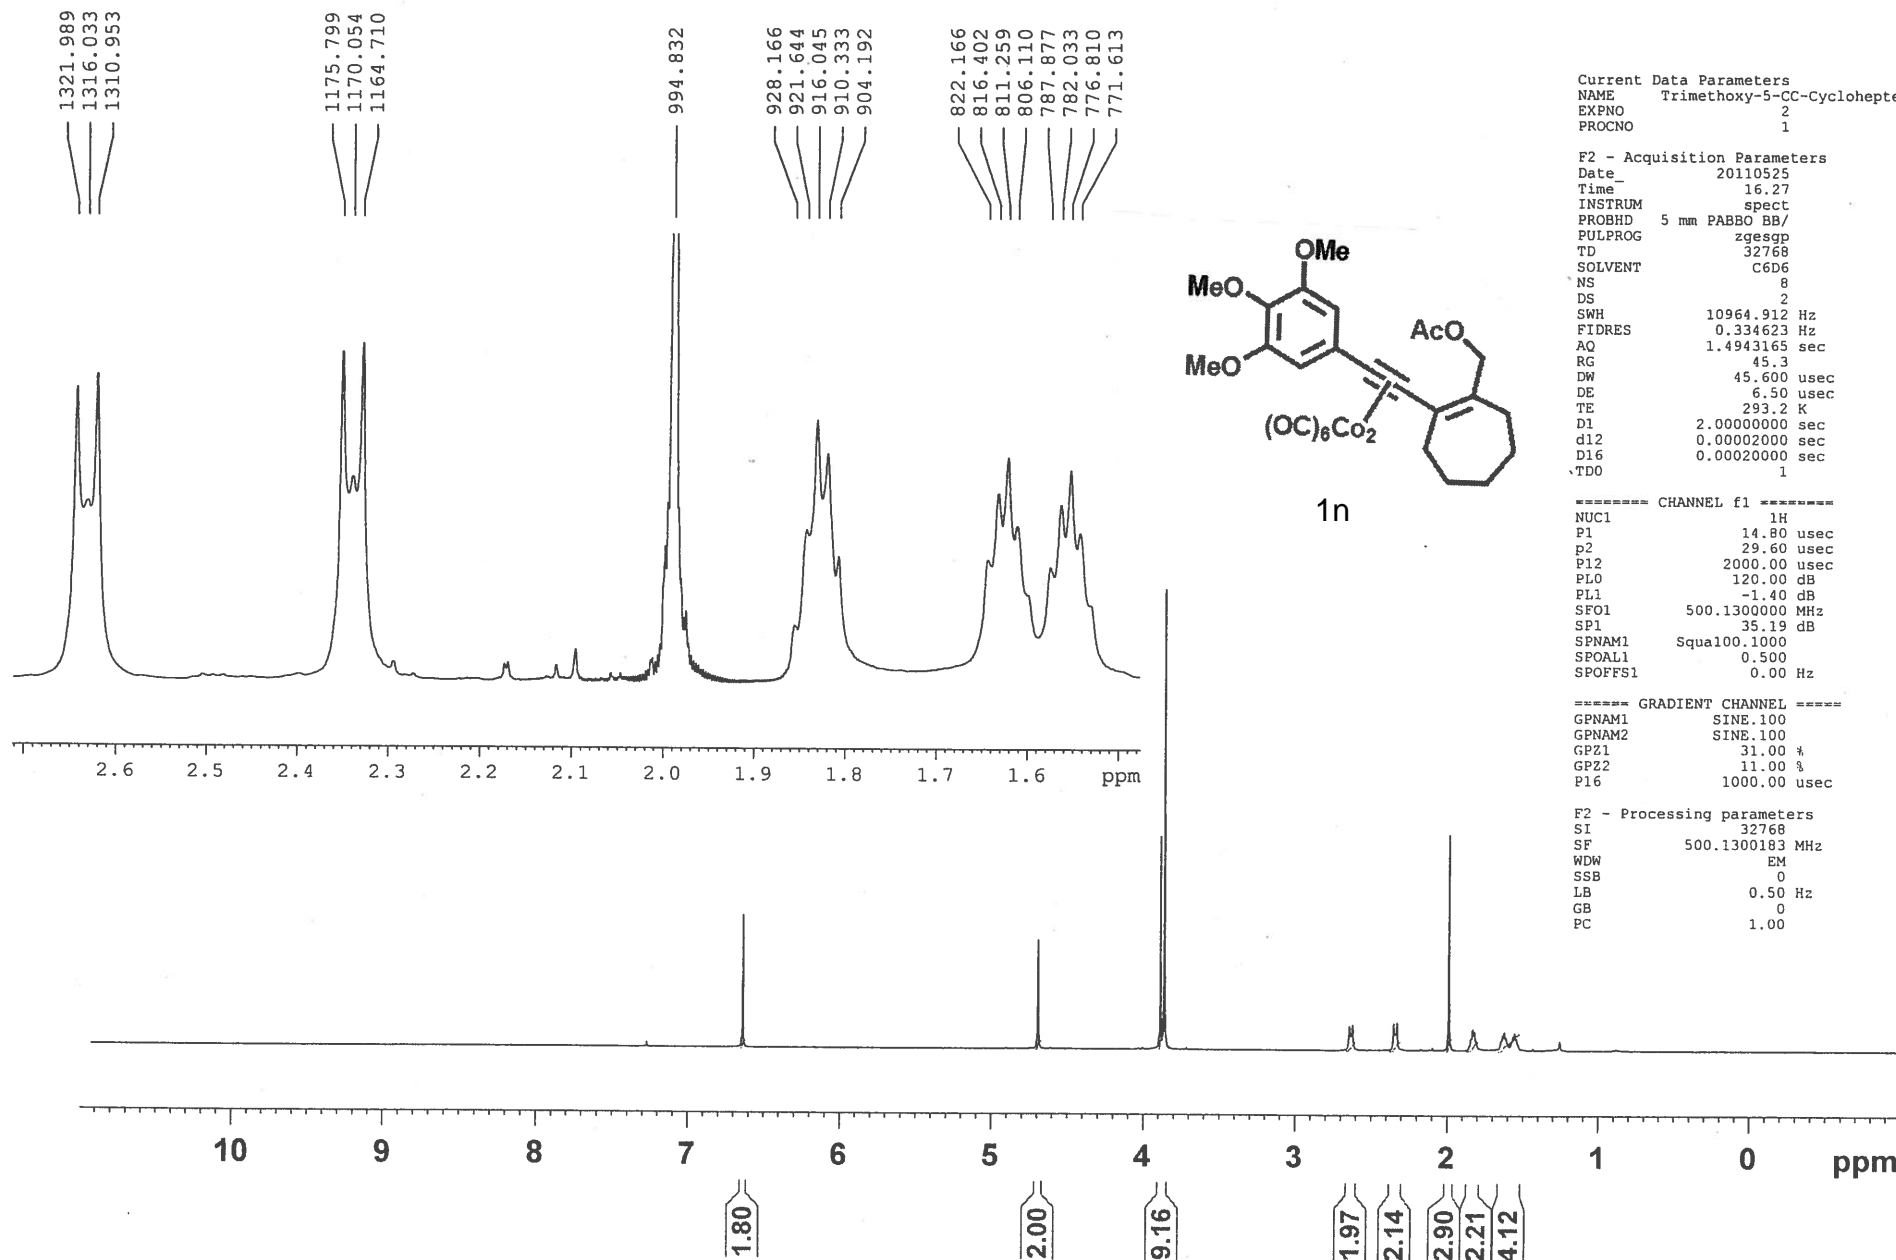

Current Data Parameters  
 NAME Trimethoxy-5-CC-CyclohepteneOAc Co2(CO)6  
 EXPNO 2  
 PROCNO 1

F2 - Acquisition Parameters  
 Date\_ 20110525  
 Time\_ 16.27  
 INSTRUM spect  
 PROBHD 5 mm PABBO BB/  
 PULPROG zgpg30  
 TD 32768  
 SOLVENT C6D6  
 NS 8  
 DS 2  
 SWH 10964.912 Hz  
 FIDRES 0.334623 Hz  
 AQ 1.4943165 sec  
 RG 45.3  
 DW 45.600 usec  
 DE 6.50 usec  
 TE 293.2 K  
 D1 2.00000000 sec  
 d12 0.00002000 sec  
 D16 0.00020000 sec  
 TD0 1

===== CHANNEL f1 =====  
 NUC1 1H  
 P1 14.80 usec  
 p2 29.60 usec  
 P12 2000.00 usec  
 PLO 120.00 dB  
 PL1 -1.40 dB  
 SFO1 500.1300000 MHz  
 SP1 35.19 dB  
 SPMAM1 Squa100.1000  
 SPOAL1 0.500  
 SPOFFS1 0.00 Hz

===== GRADIENT CHANNEL =====  
 GPNAM1 SINE.100  
 GPNAM2 SINE.100  
 GPZ1 31.00 %  
 GPZ2 11.00 %  
 P16 1000.00 usec

F2 - Processing parameters  
 SI 32768  
 SF 500.1300183 MHz  
 WDW EM  
 SSB 0  
 LB 0.50 Hz  
 GB 0  
 PC 1.00

Thursday 26 May 2011

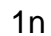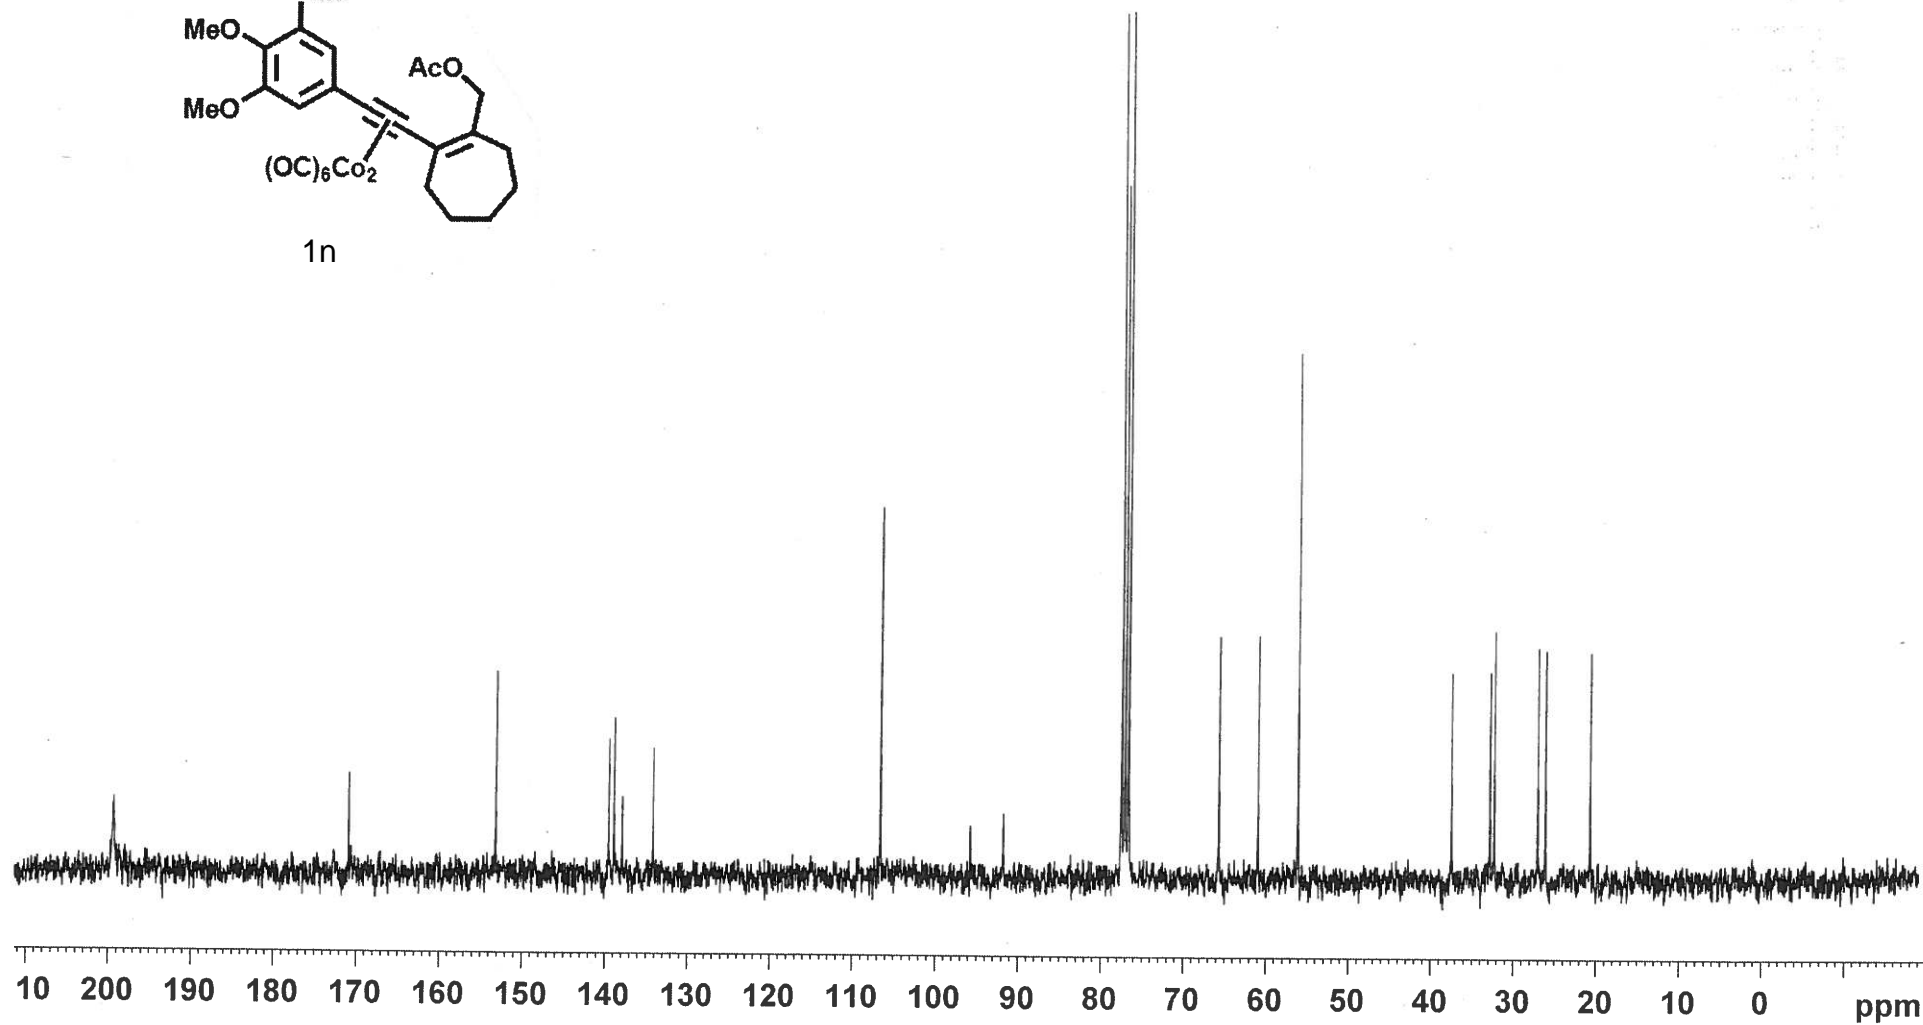

RosmarDerivative-CC-CyclohexeneOAc Co2(CO)6  
 Experiment 5 TOpSpin 500  
 Friday 07 January 2010

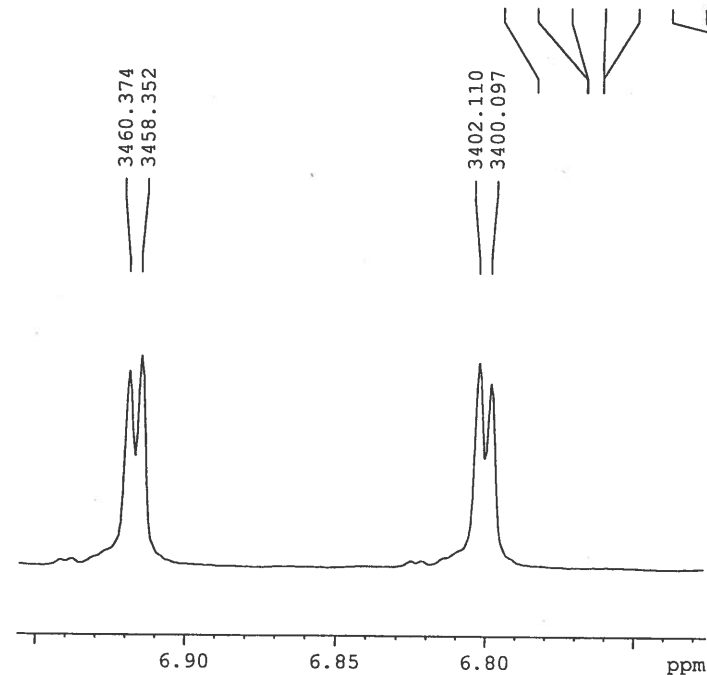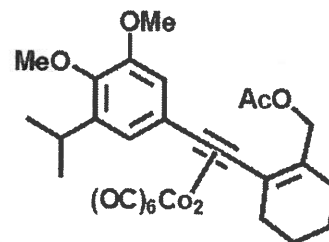

10

Current Data Parameters  
 NAME RosmarDerivative-CC-CyclohexeneOAc Co2(CO)6  
 EXPNO 5  
 PROCNO 1

F2 - Acquisition Parameters  
 Date\_ 20110107  
 Time 13.36  
 INSTRUM spect  
 PROBHD 5 mm PABBO BB/  
 PULPROG zgpg30  
 TD 32768  
 SOLVENT H2O  
 NS 8  
 DS 2  
 SNR 10964.912 Hz  
 FIDRES 0.334623 Hz  
 AQ 1.4942708 sec  
 RG 40.3  
 DW 45.600 usec  
 DE 6.50 usec  
 TE 290.2 K  
 D1 2.00000000 sec  
 d12 0.00002000 sec  
 D16 0.00020000 sec  
 TDO 1

===== CHANNEL f1 =====  
 NUC1 1H  
 P1 14.80 usec  
 P2 29.60 usec  
 P12 2000.00 usec  
 PL0 120.00 dB  
 PL1 -1.40 dB  
 SFO1 500.1300000 MHz  
 SP1 35.19 dB  
 SPNAM1 Squa100.1000  
 SPOAL1 0.500  
 SPOFFS1 0.00 Hz

===== GRADIENT CHANNEL =====  
 GPNAM1 SINE.100  
 GPNAM2 SINE.100  
 GP21 31.00 %  
 GP22 11.00 %  
 P16 1000.00 usec

F2 - Processing parameters  
 SI 32768  
 SF 500.1300187 MHz  
 WDW EM  
 SSB 0  
 LB 0.20 Hz  
 GB 0  
 PC 1.00

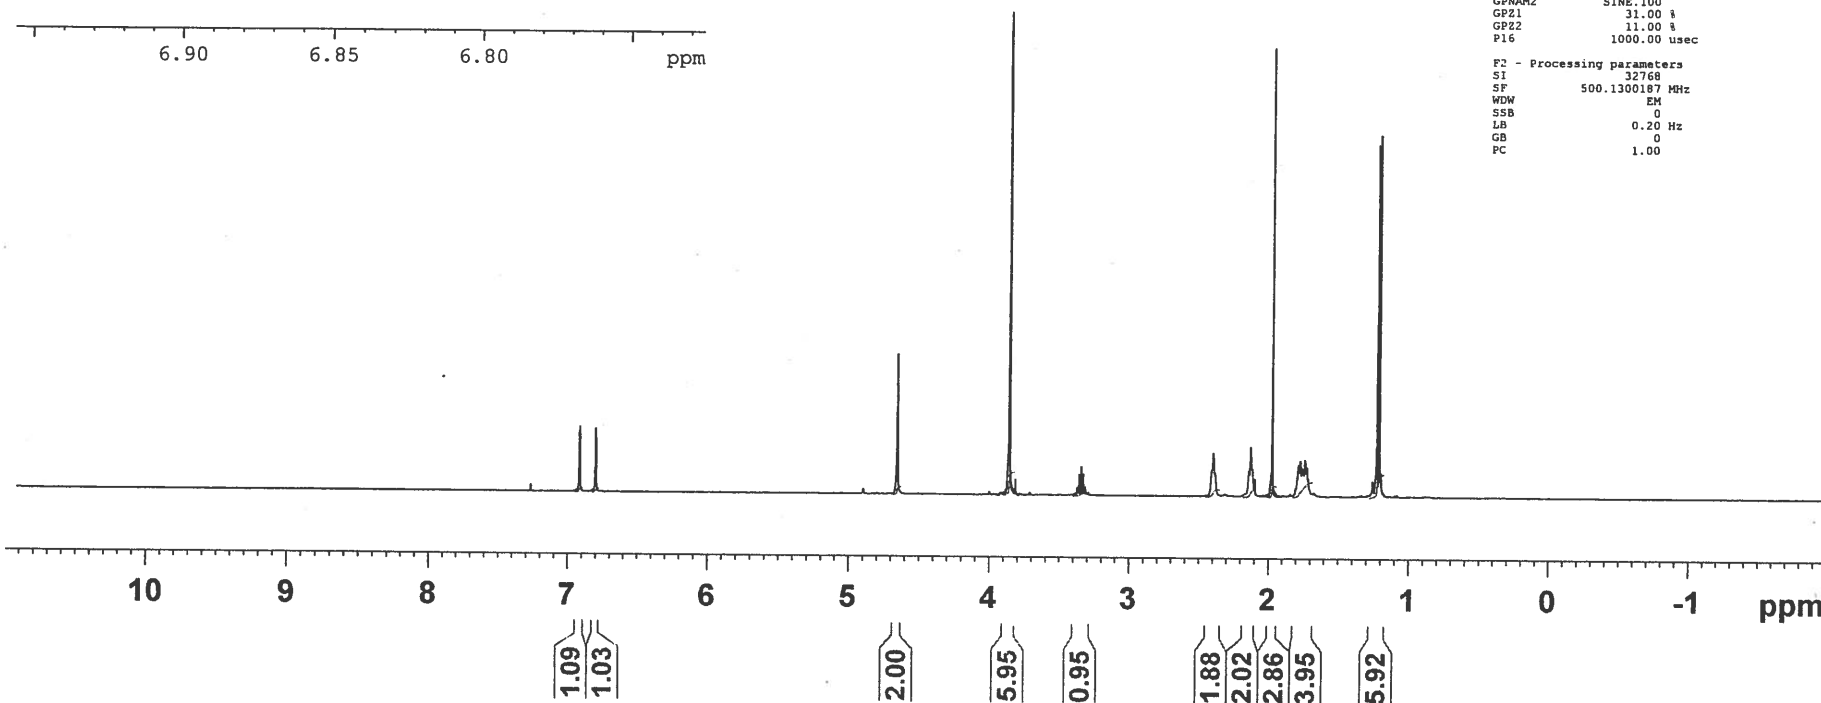

RosmarDerivative -OAc Complexed 13C  
 Experiment 3 Ultra 300  
 Friday 08 January 2011

19971

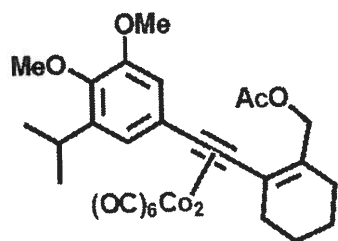

10

Current Data Parameters  
 NAME RosmarDerivative -OAc Complexed 13C  
 EXPNO 3  
 PROCNO 1

F2 - Acquisition Parameters  
 Date\_ 20110108  
 Time 2.42  
 INSTRUM av300  
 PROBHD 5 mm BBO BB-1H  
 PULPROG zgpg30  
 TD 16384  
 SOLVENT C6D6  
 NS 724  
 DS 4  
 SWH 17985.611 Hz  
 FIDRES 1.097755 Hz  
 AQ 0.4555252 sec  
 RG 20642.5  
 DN 27.800 usec  
 DE 6.00 usec  
 TE 300.0 K  
 D1 1.0000000 sec  
 d11 0.0300000 sec  
 d12 0.0002000 sec

----- CHANNEL f1 -----  
 NUC1 13C  
 P1 11.25 usec  
 PL1 0.00 dB  
 SFO1 75.4752953 MHz

----- CHANNEL f2 -----  
 CPDPRG2 waltz16  
 NUC2 1H  
 PCPD2 80.00 usec  
 PL2 0.00 dB  
 PL12 16.55 dB  
 PL13 24.00 dB  
 SFO2 300.1312005 MHz

F3 - Processing parameters  
 SI 8192  
 SF 75.4677423 MHz  
 WDM 84  
 SSB 0  
 LB 2.50 Hz  
 GB 0  
 PC 1.40

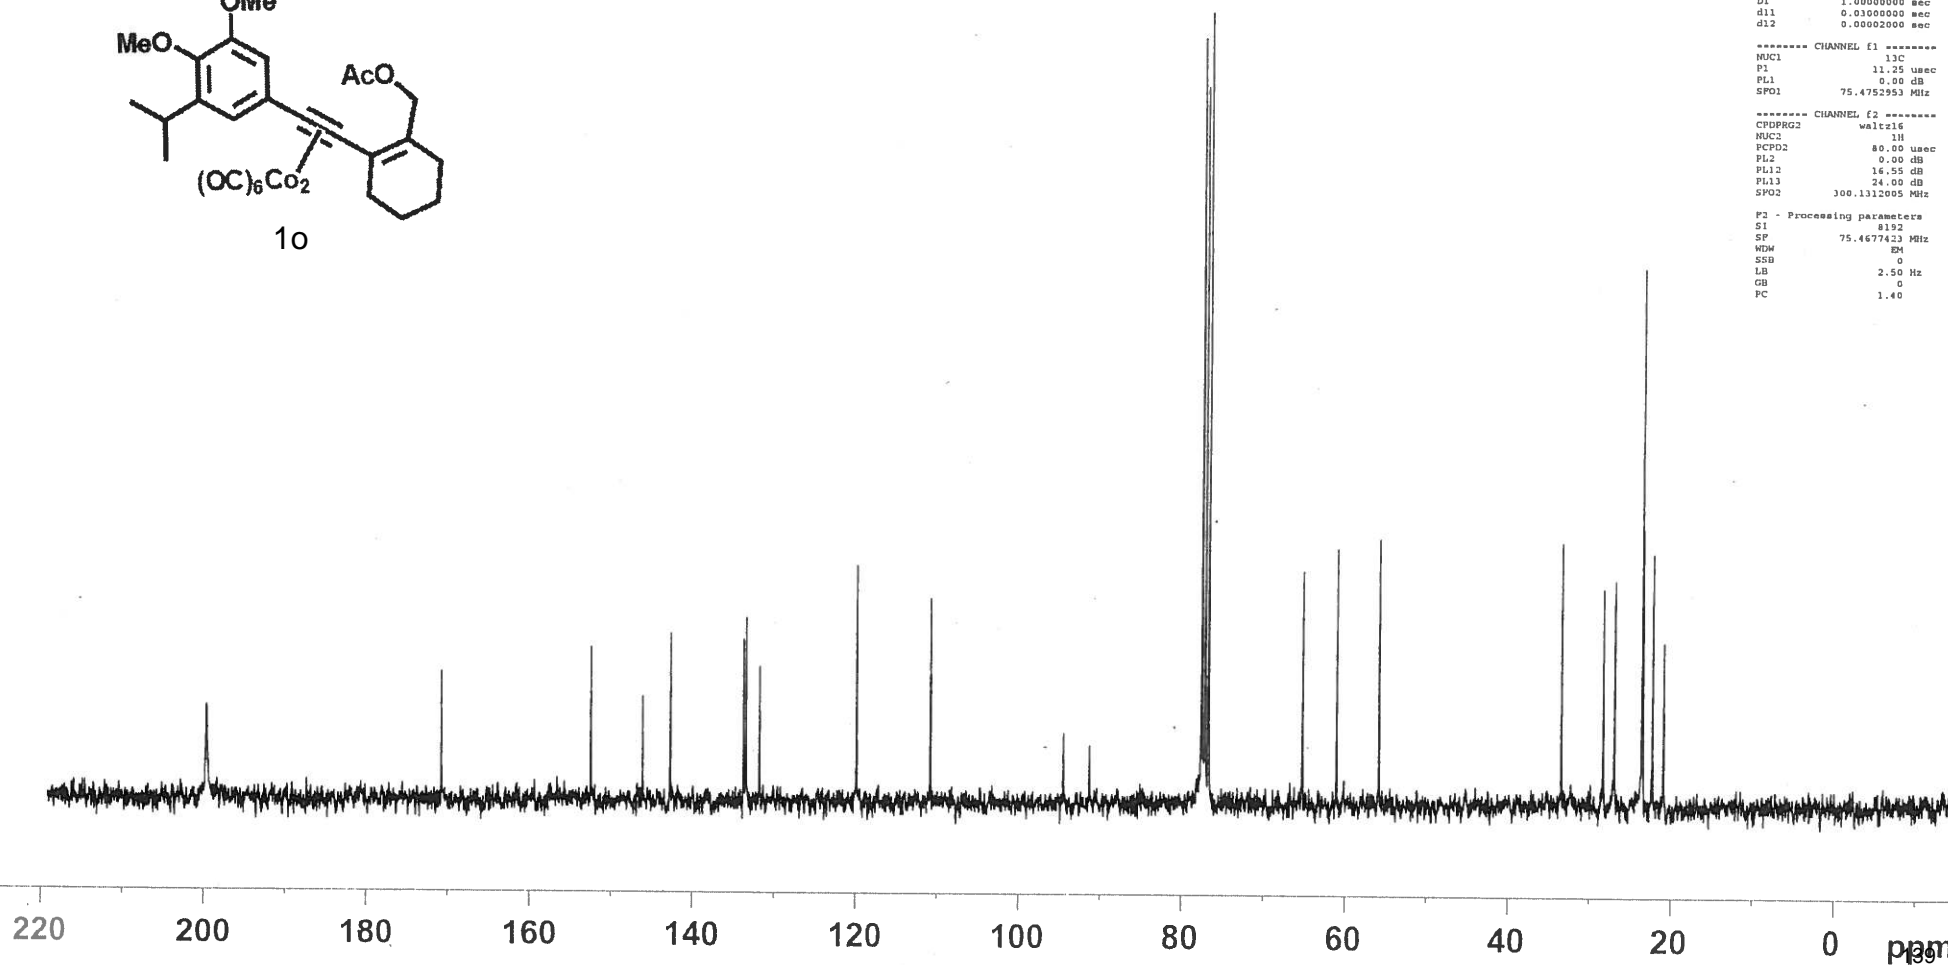

Thiophene-3-CC-CyclohexeneOAc  
 Experiment 2 Topspin 5098  
 Thursday 01 September 2011

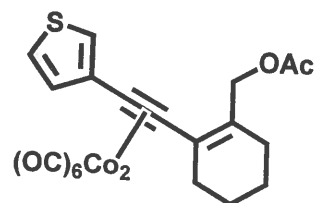

1p

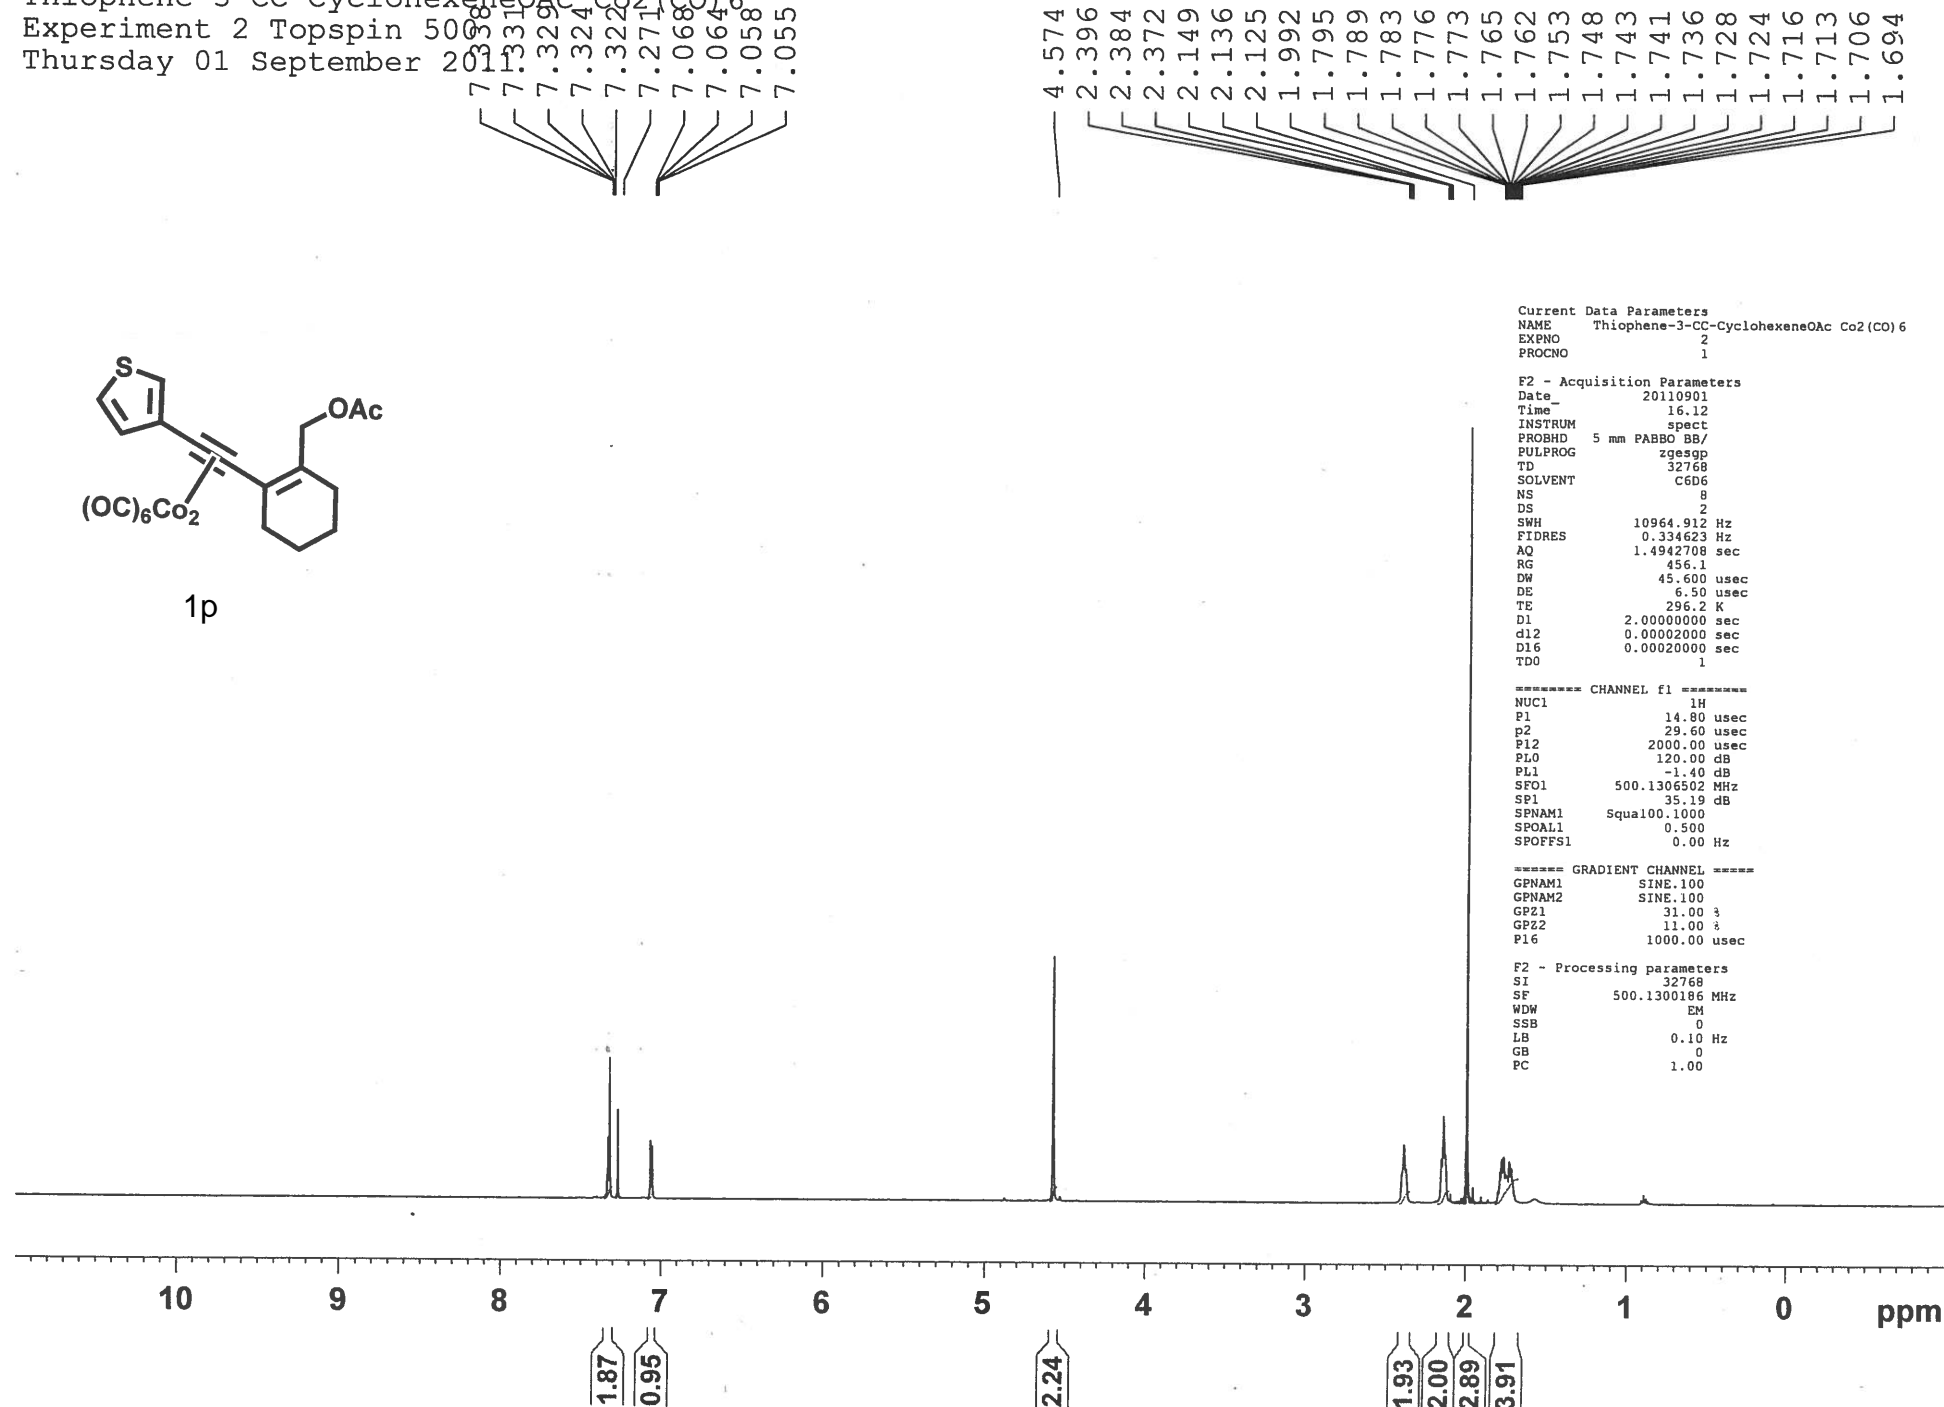

Current Data Parameters  
 NAME Thiophene-3-CC-CyclohexeneOAc Co2(CO)6  
 EXPNO 2  
 PROCNO 1

F2 - Acquisition Parameters  
 Date\_ 20110901  
 Time 16.12  
 INSTRUM spect  
 PROBHD 5 mm PABBO BB/  
 PULPROG zgpg30  
 TD 32768  
 SOLVENT C6D6  
 NS 8  
 DS 2  
 SWH 10964.912 Hz  
 FIDRES 0.334623 Hz  
 AQ 1.4942708 sec  
 RG 456.1  
 DW 45.600 usec  
 DE 6.50 usec  
 TE 296.2 K  
 D1 2.00000000 sec  
 d12 0.0002000 sec  
 D16 0.0002000 sec  
 TDO 1

===== CHANNEL f1 =====  
 NUC1 1H  
 P1 14.80 usec  
 P2 29.60 usec  
 P12 2000.00 usec  
 PL0 120.00 dB  
 PL1 -1.40 dB  
 SFO1 500.1306502 MHz  
 SP1 35.19 dB  
 SPNAM1 Squal00.1000  
 SPOAL1 0.500  
 SPOFFS1 0.00 Hz

===== GRADIENT CHANNEL =====  
 GPNAM1 SINE.100  
 GPNAM2 SINE.100  
 GPZ1 31.00 %  
 GPZ2 11.00 %  
 PL6 1000.00 usec

F2 - Processing parameters  
 SI 32768  
 SF 500.1300186 MHz  
 WDW EM  
 SSB 0  
 LB 0.10 Hz  
 GB 0  
 PC 1.00



Thiophene-3-CC-CyclohexeneOAc Co<sub>2</sub>(CO)<sub>6</sub> 13C  
 Experiment 4 Topspin ULtra 300  
 Wednesday 14 September 2011

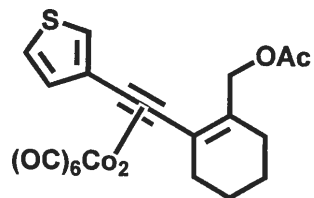

1p

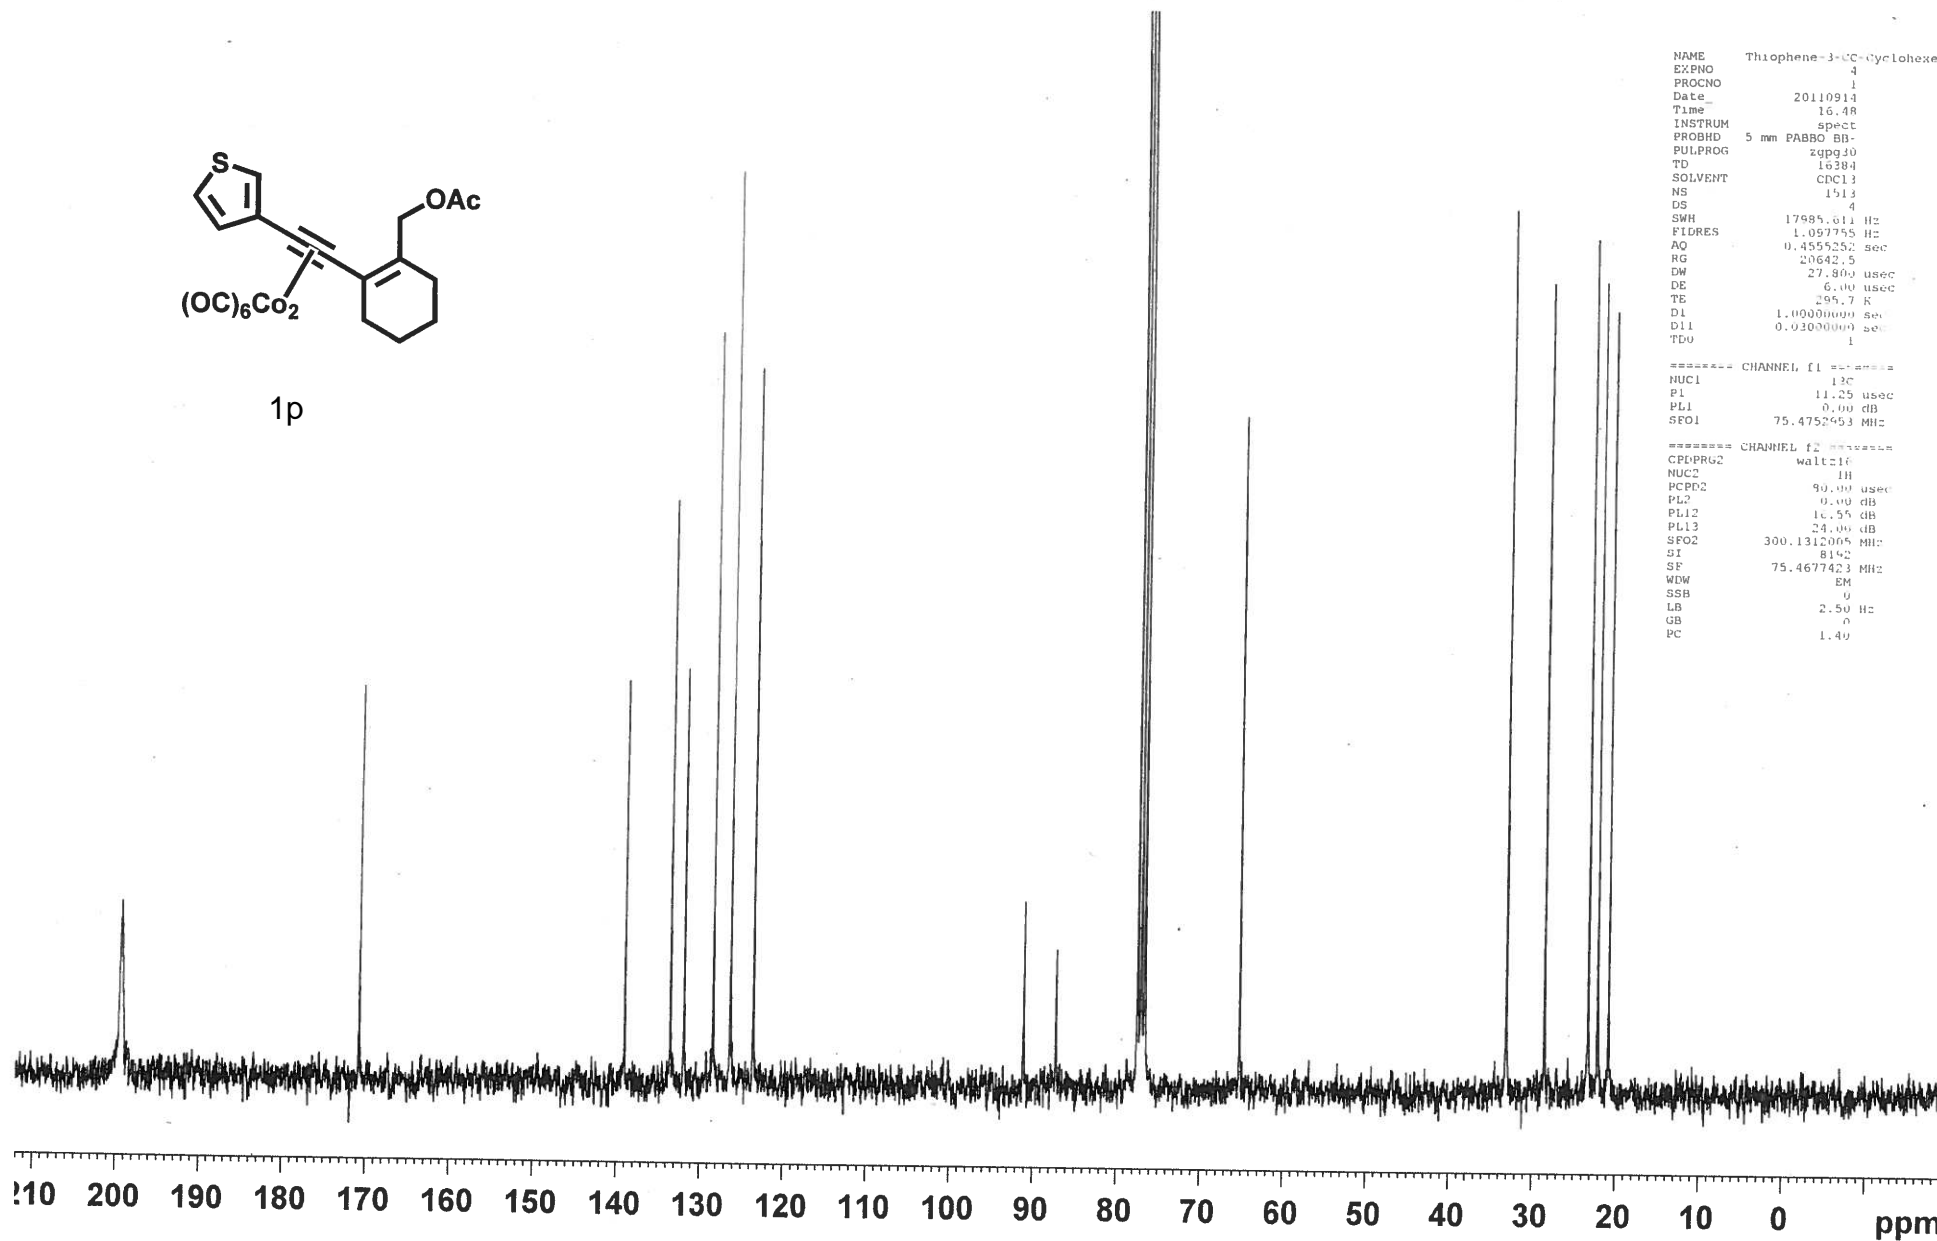

```

NAME      Thiophene-3-CC-CyclohexeneOAc Co2(CO)6 13C
EXPNO     4
PROCNO    1
Date_     20110914
Time      16.48
INSTRUM    spect
PROBHD     5 mm PABBO BB-
PULPROG    zgpg30
TD         16384
SOLVENT    CDCl3
NS         1513
DS         4
SWH         17985.611 Hz
FIDRES     1.097755 Hz
AQ         0.4555252 sec
RG         20642.5
DW         27.800 usec
DE         6.00 usec
TE         295.7 K
D1         1.0000000 sec
D11        0.0100000 sec
TD0        1

===== CHANNEL f1 =====
NUC1       13C
P1         11.25 usec
PL1        0.00 dB
SFO1       75.4752453 MHz

===== CHANNEL f2 =====
CPDPRG2    waltz16
NUC2       1H
PCPD2      90.00 usec
PL2        0.00 dB
PL12       16.55 dB
PL13       24.00 dB
SFO2       300.1312065 MHz
SI         8142
SF         75.4677423 MHz
WDW        EM
SSB        0
LB         2.50 Hz
GB         0
PC         1.40
  
```

Phenyl-CC-Cyclohexene Nicholas - Elimination Co2(CO)6  
 Thursday 23 September 2010  
 Topsis 500  
 Experiment 2

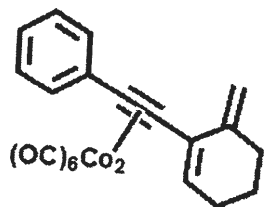

11b

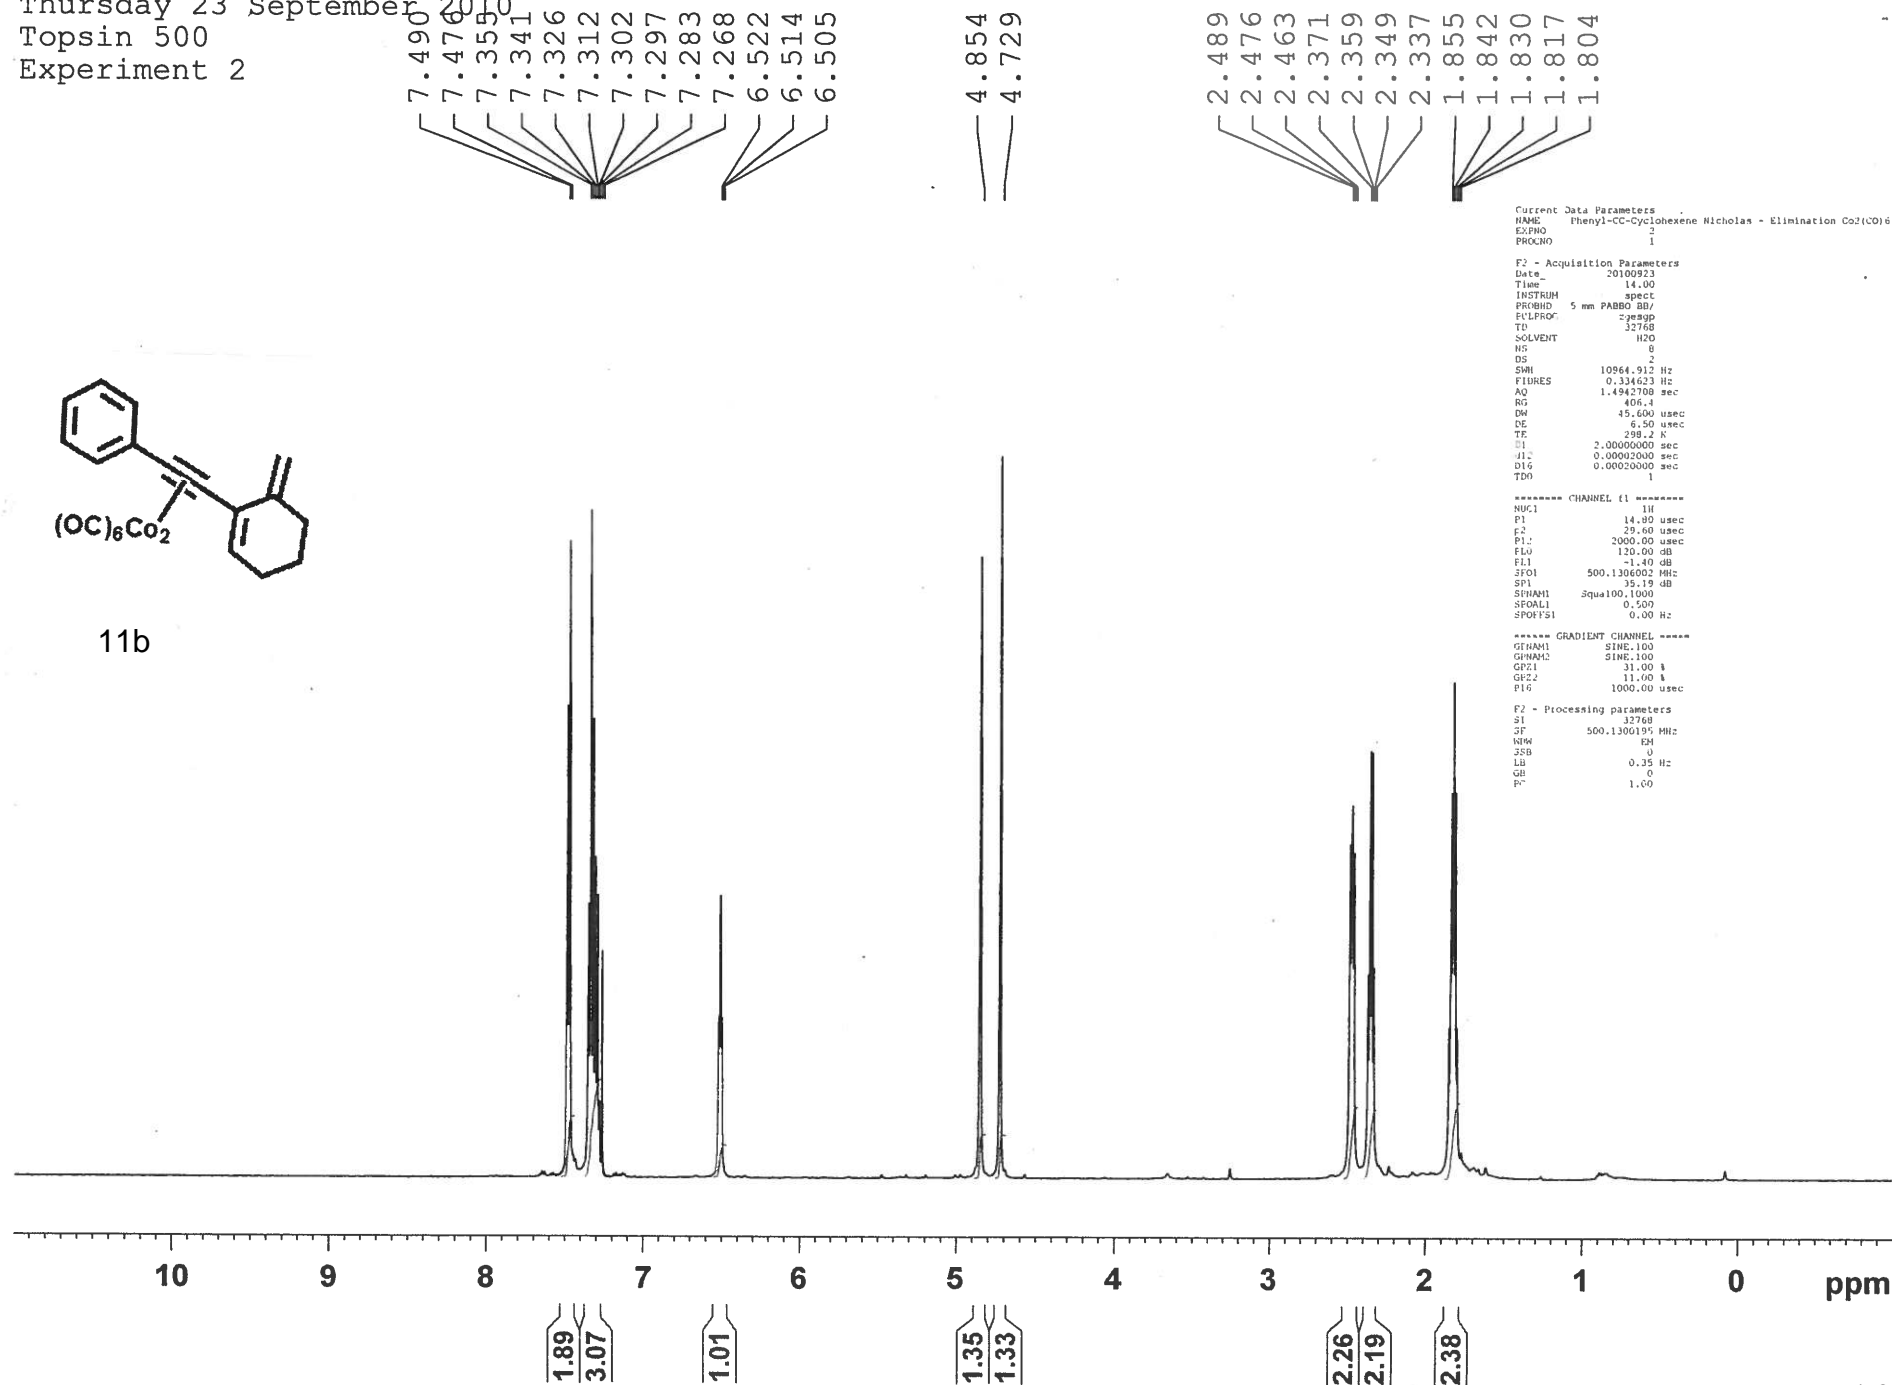

Current Data Parameters  
 NAME Phenyl-CC-Cyclohexene Nicholas - Elimination Co2(CO)6  
 EXPNO 2  
 PROCNO 1

F2 - Acquisition Parameters  
 Date\_ 20100923  
 Time 14:00  
 INSTRUM spect  
 PROBD 5 mm PABBO BB/  
 PULPROG zgpg30  
 TD 32768  
 SOLVENT H2O  
 NS 8  
 DS 2  
 SWH 10964.912 Hz  
 FIDRES 0.334623 Hz  
 AQ 1.4942708 sec  
 RG 406.4  
 DM 45.600 usec  
 DE 6.50 usec  
 TE 298.2 K  
 D1 2.00000000 sec  
 d12 0.0002000 sec  
 D16 0.00020000 sec  
 TD0 1

===== CHANNEL f1 =====  
 NUC1 1H  
 P1 14.00 usec  
 P2 29.60 usec  
 PL 2000.00 usec  
 FID 120.00 dB  
 FL1 -1.40 dB  
 JFO1 500.1306002 MHz  
 SFO1 50.1306002 MHz  
 SFOAL1 0.500  
 SFOAL2 0.500 Hz

===== GRADIENT CHANNEL =====  
 G1NAME1 SINE.100  
 G1NAME2 SINE.100  
 GE21 31.00 V  
 GE22 11.00 V  
 P16 1000.00 usec

F2 - Processing parameters  
 SI 32768  
 SF 500.1300195 MHz  
 NRG EM  
 JSB 0  
 LB 0.35 Hz  
 GB 0  
 PC 1.00

Phenyl-CC-Cyclohexene Nicholas - Elimination  $\text{Co}_2(\text{CO})_6$   
 Ultra 300  
 Thursday 23 September 2010  
 Experiment 2

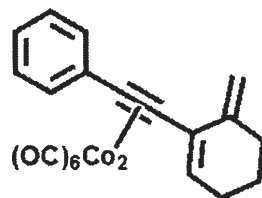

11b

19.89

140.54  
138.54  
136.80  
135.24  
130.16  
128.74  
127.75

112.94

91.86  
93.62

77.56  
77.12  
76.71

32.04  
29.84  
27.13  
22.50

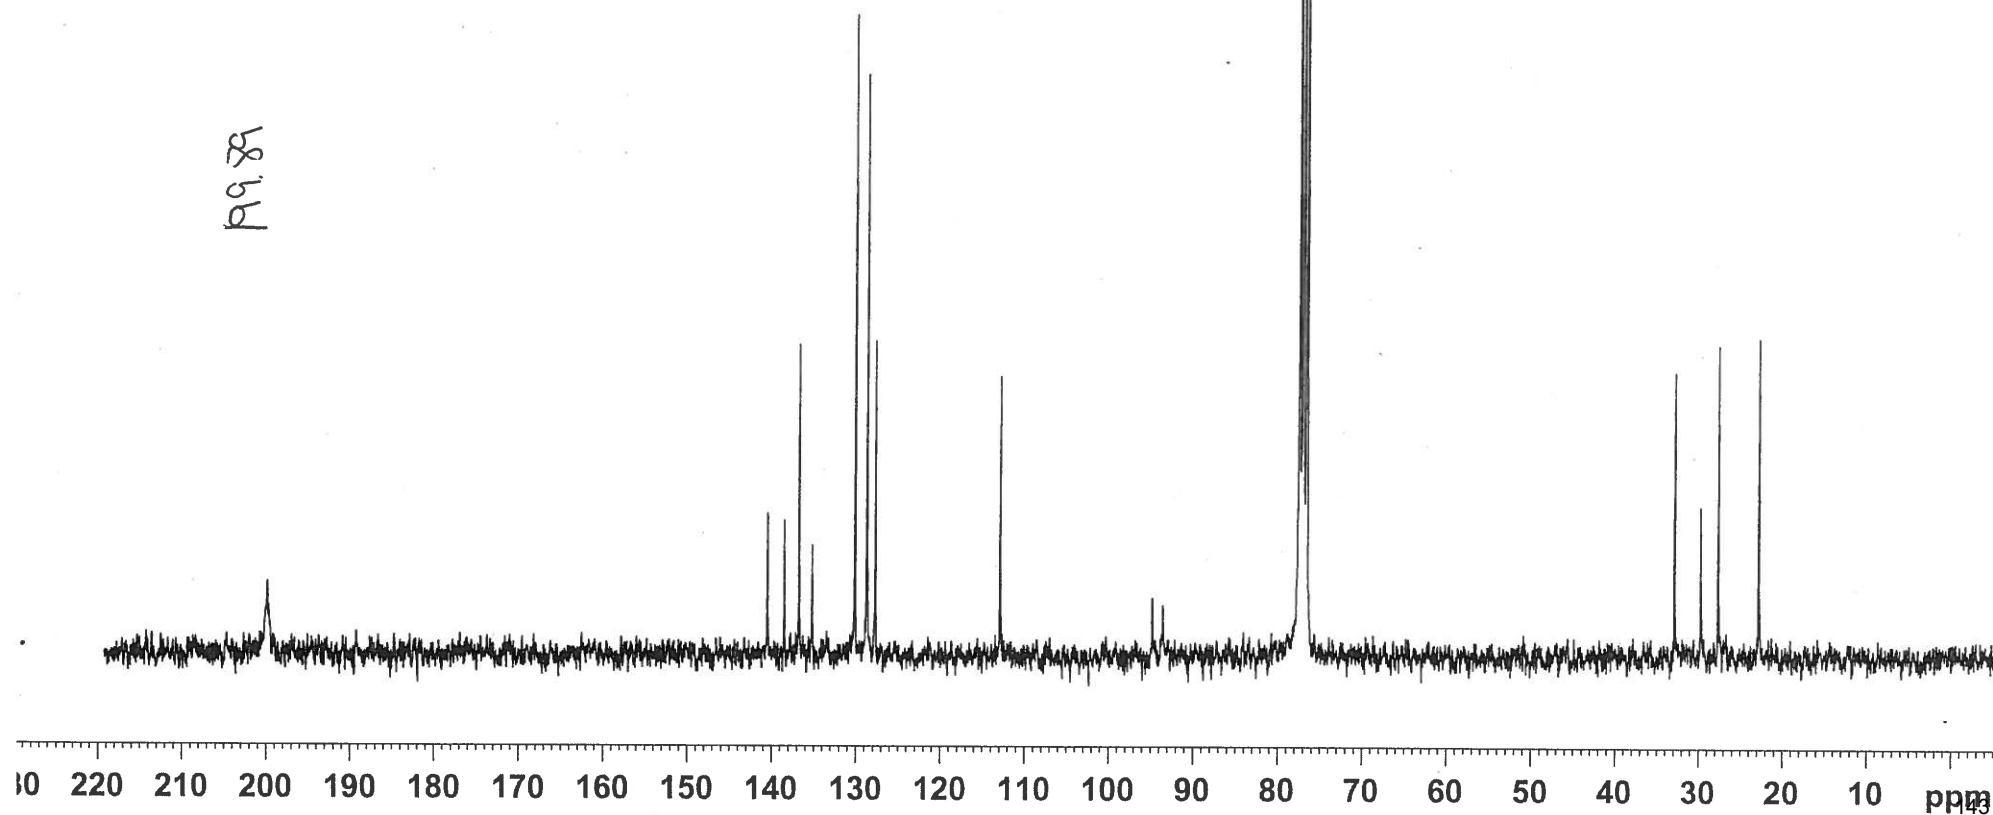

Anisole-3-CC-CyclohexeneOAc Nicholas Cyclization  
500 Topsis Experiment 2 Major B2  
26 August 2009

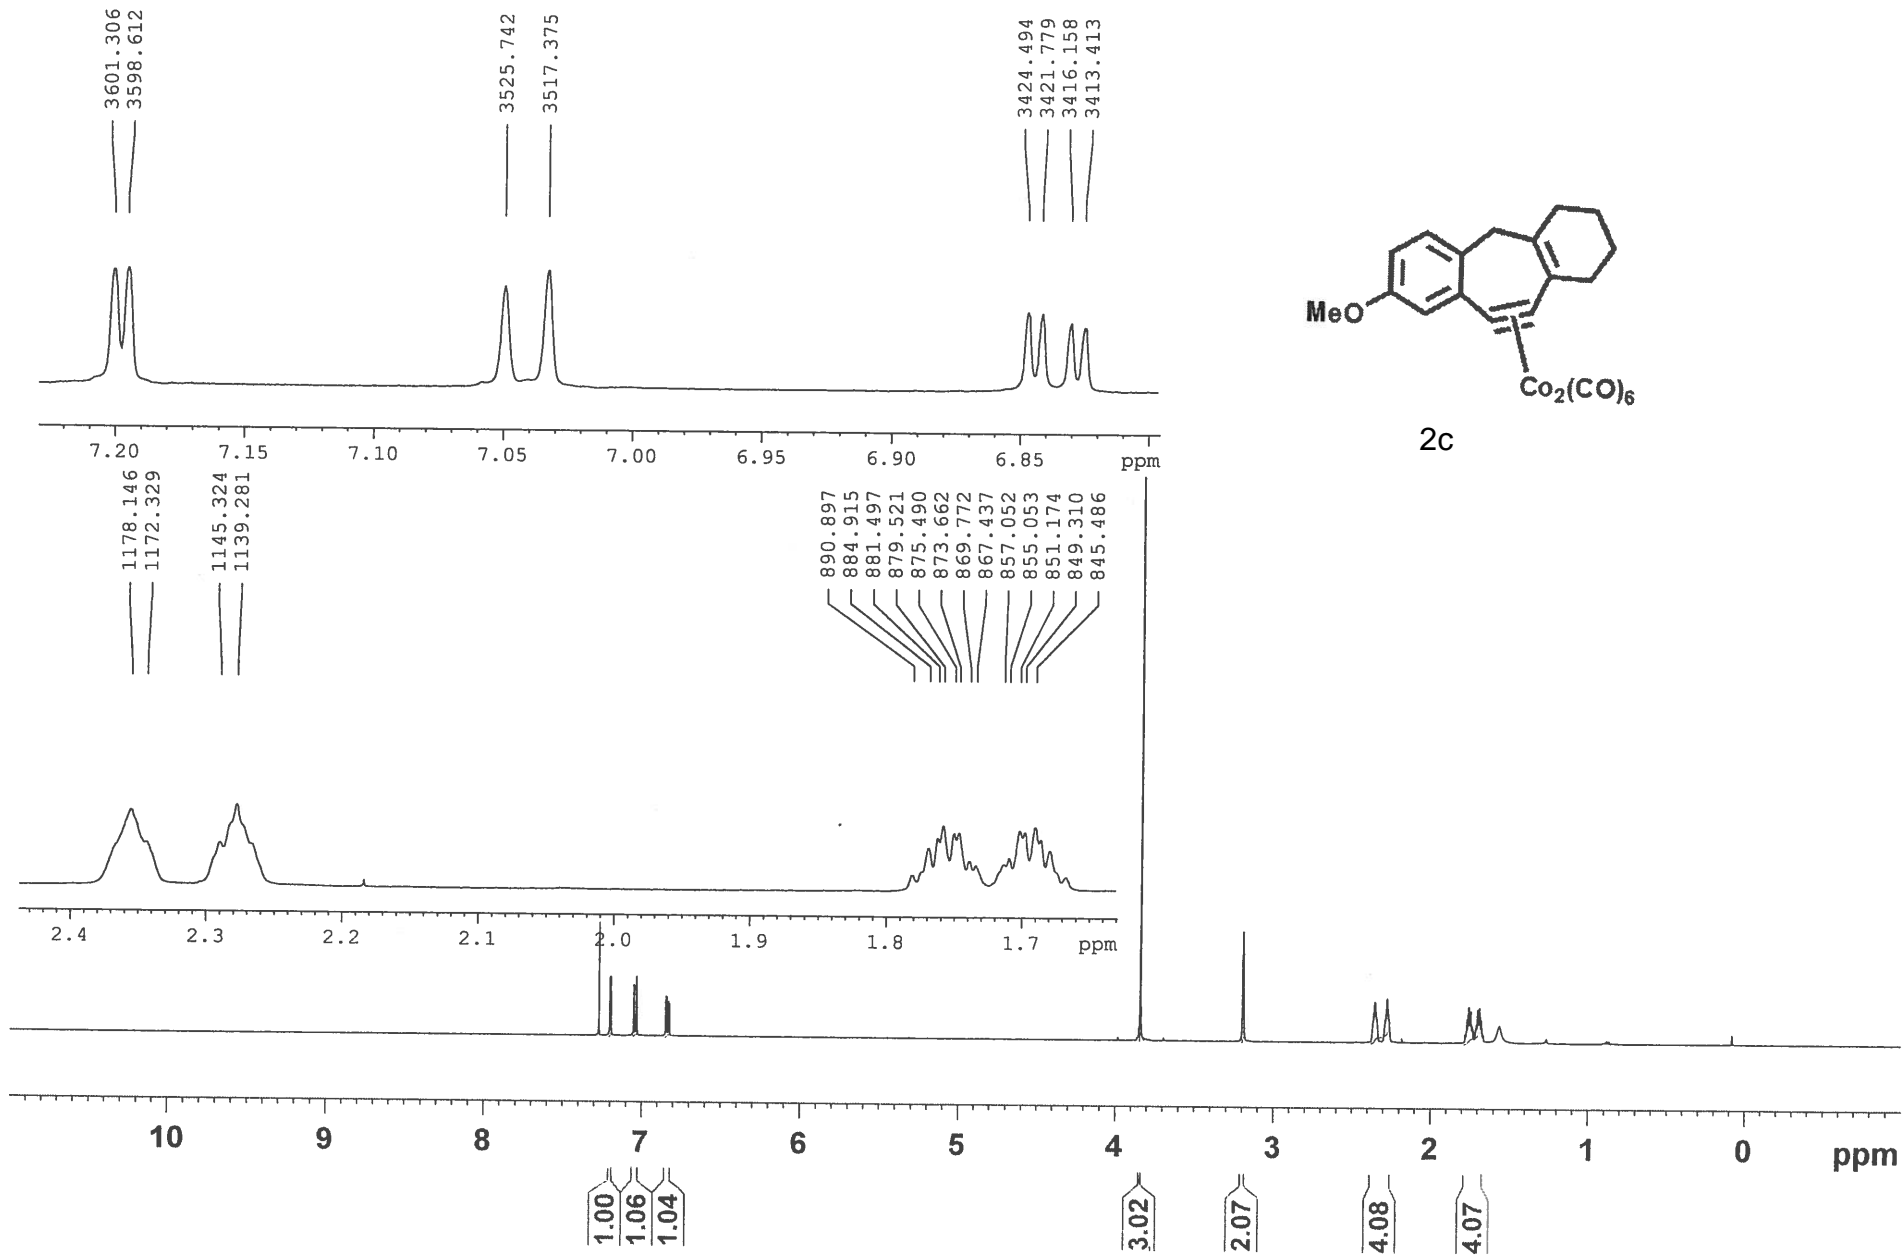

Anisole-3-CC-CyclohexeneOAc Cyclized Major B2 13C  
 300 Ultra Experiment 2  
 28 August 2009

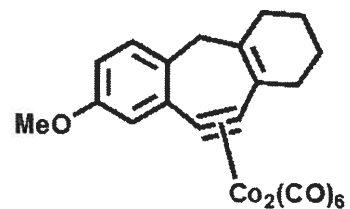

2c

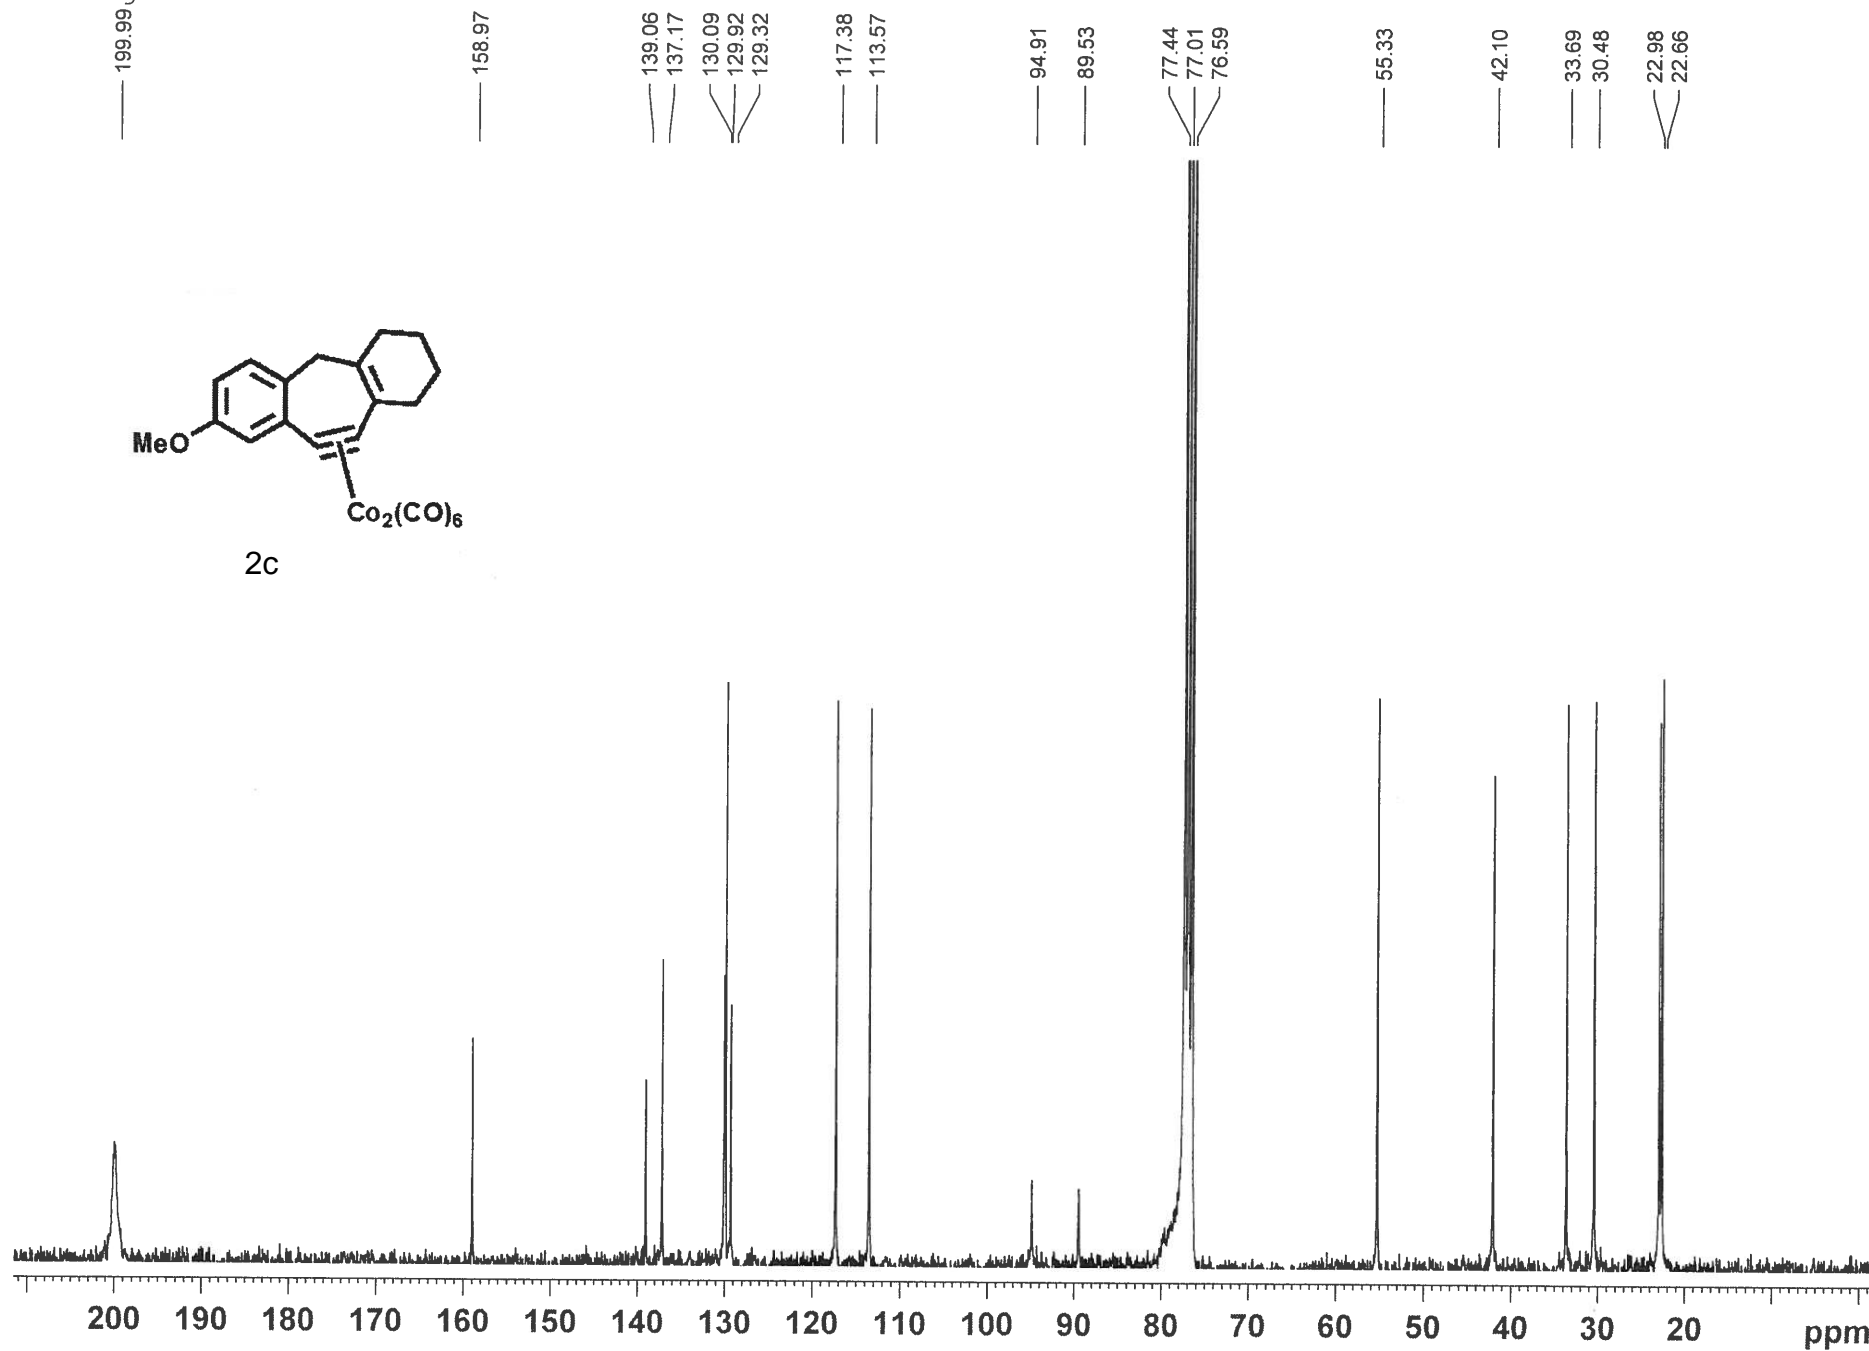

26. August 2009

26. August 2009

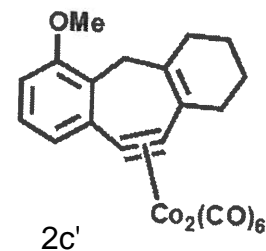

Anisole-3-CC-CyclohexeneOAc Cyclized Minor B1 13C  
 300 ULtra (in CDCl3)  
 29 August 2009

200.23

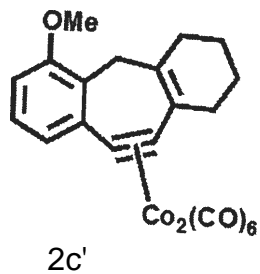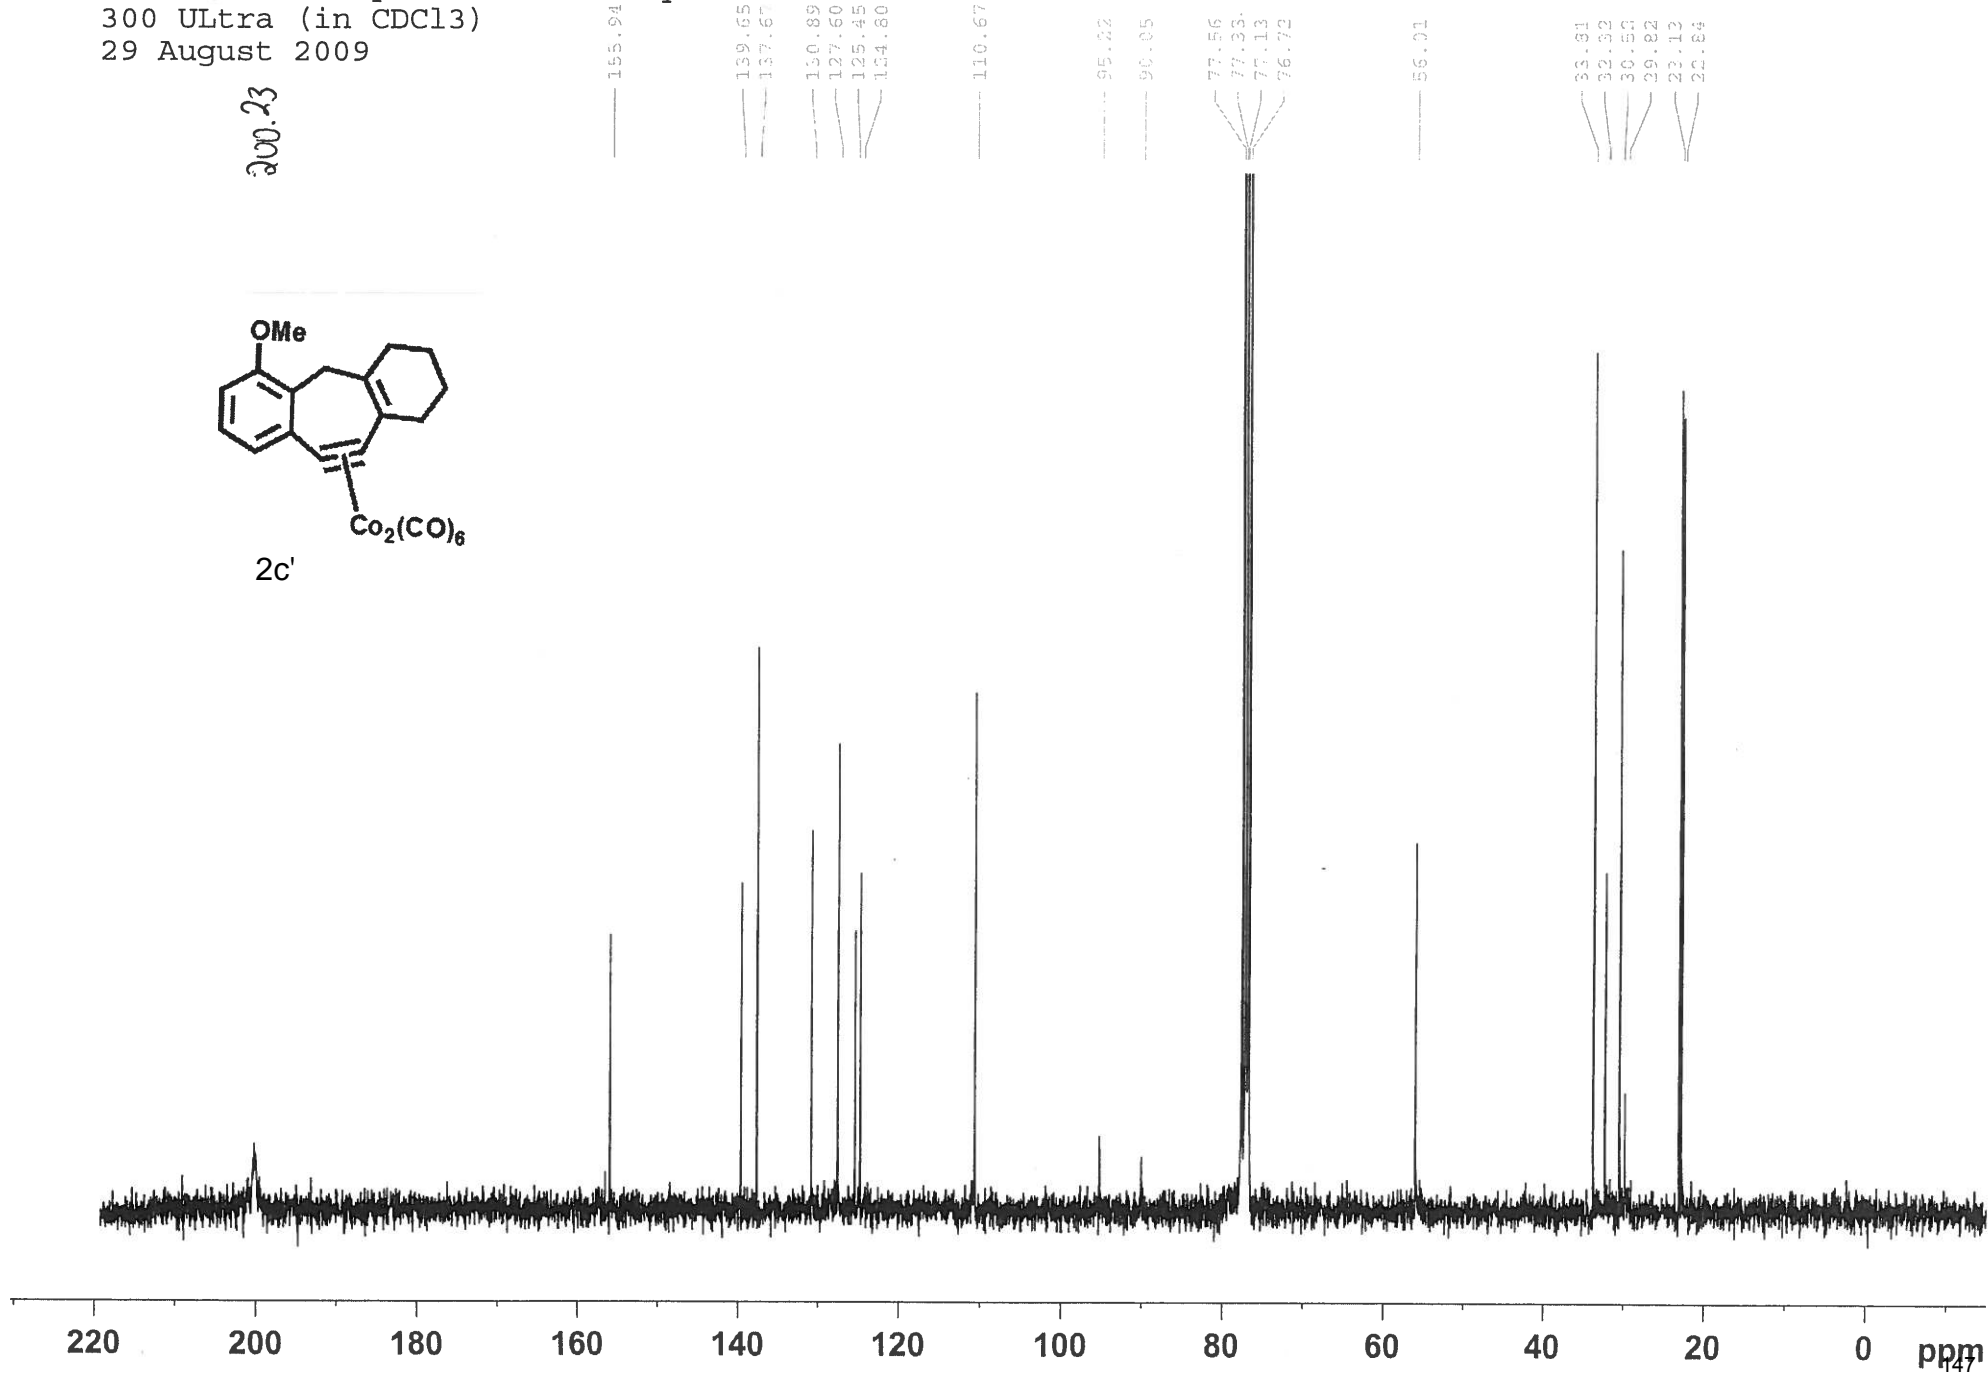

AnisoleCChexene Cyclization  
24 November 2008

300 Experiment 1

7.291  
7.256  
7.230  
7.205  
6.912  
6.886  
6.882

5.310

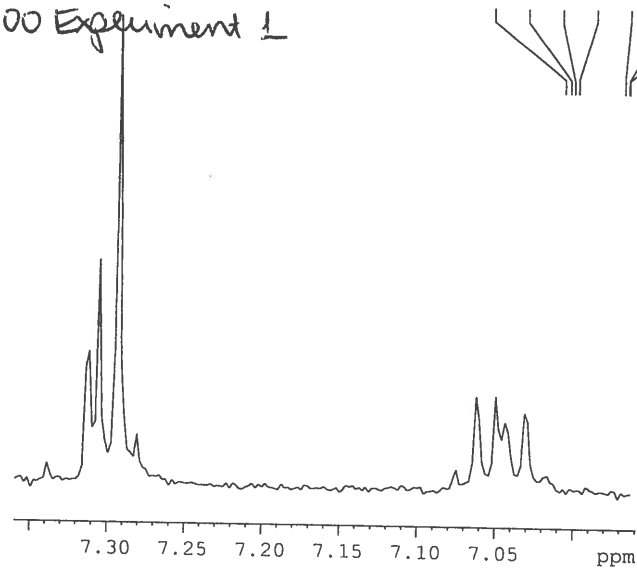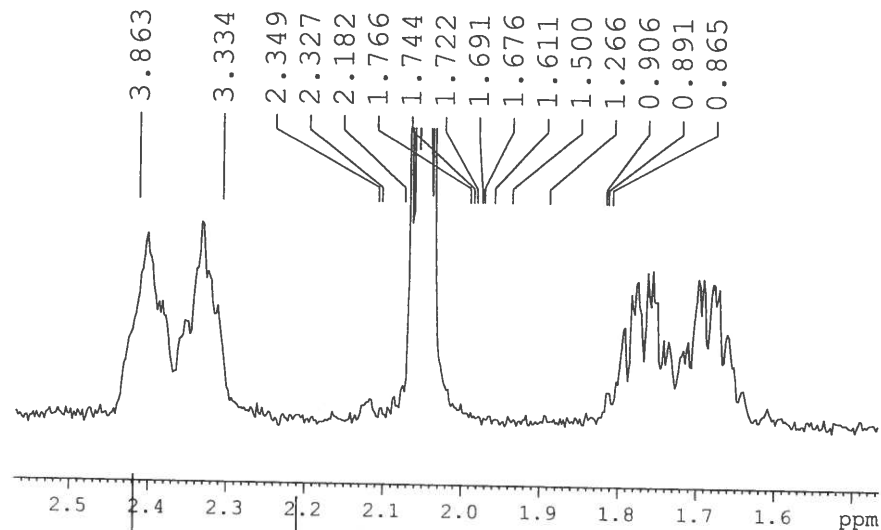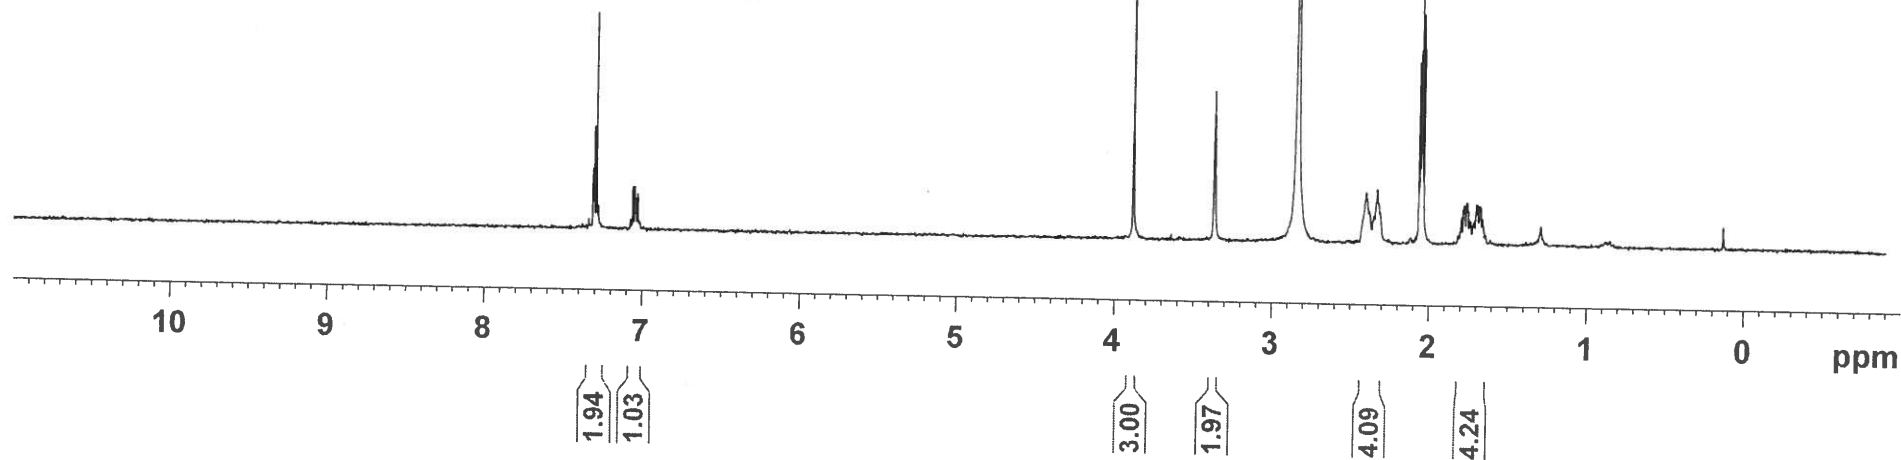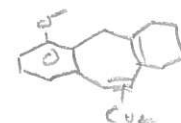



Anisole-3-CC-CyclohexeneOAc Cyclized Minor-B1 13C  
 300 Ultra (in Acetone-d6)  
 26 August 2009

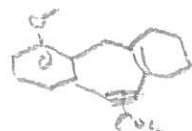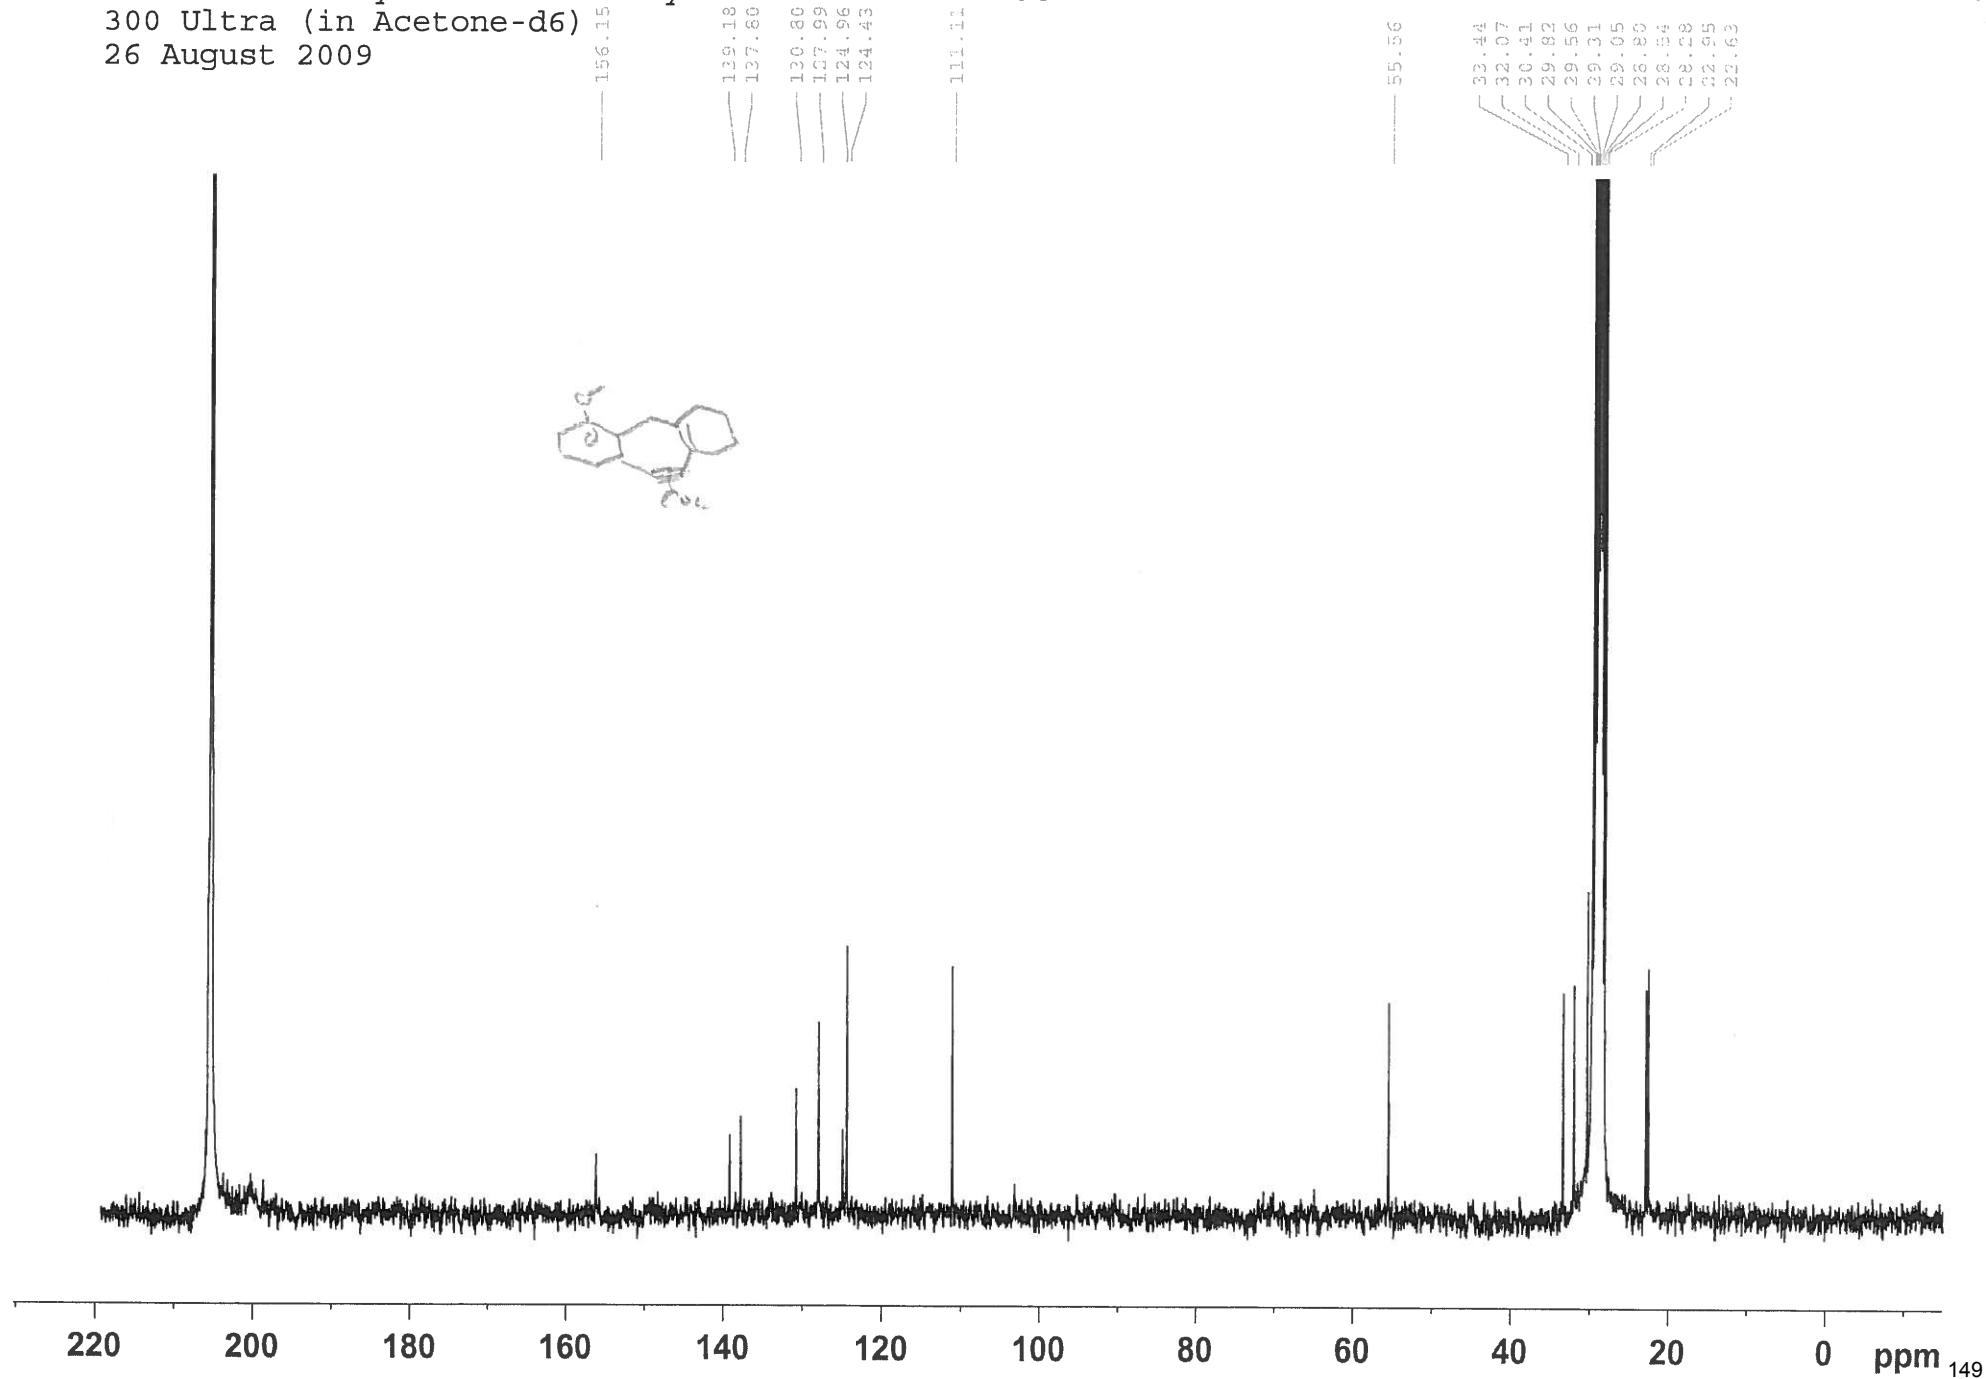

Dimethoxy-1,2-Cyclohexeneacetate-4 Co<sub>2</sub>(CO)<sub>6</sub> Nicholas  
 Experiment 6 Topspin 500  
 Thursday 14 July 2011

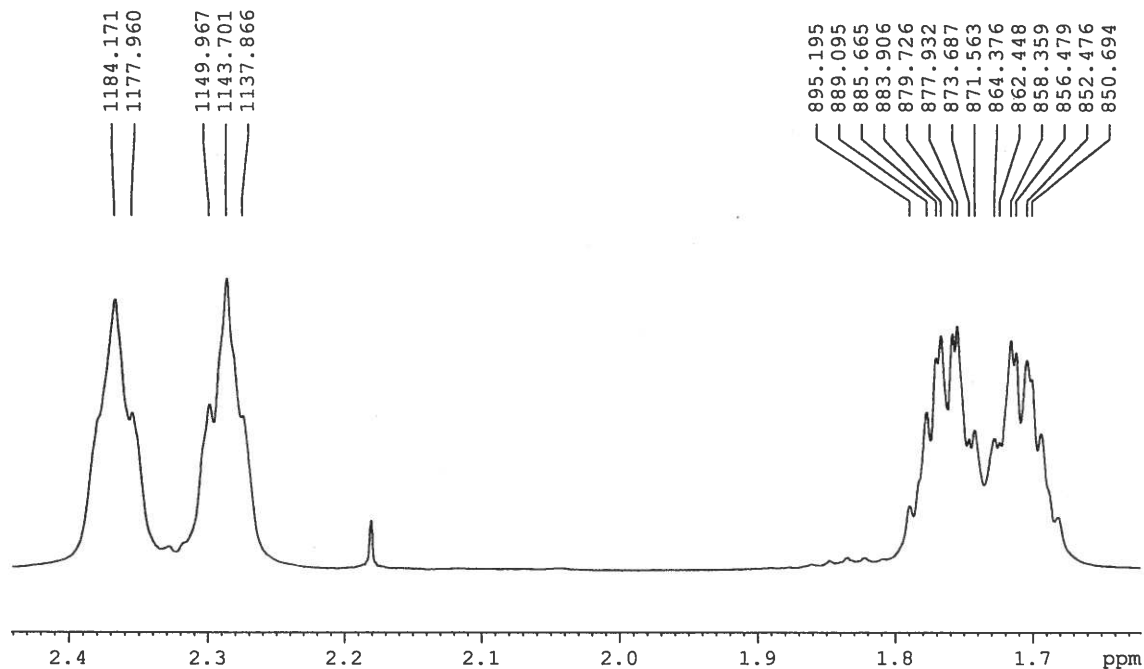

Current Data Parameters  
 NAME Dimethoxy-1,2-Cyclohexeneacetate-4 Co<sub>2</sub>(CO)<sub>6</sub> Nicholas  
 EXPNO 6  
 PROCNO 1

F2 - Acquisition Parameters  
 Date\_ 20110714  
 Time 17.03  
 INSTRUM spect  
 PROBHD 5 mm PABBO BB/  
 PULPROG zgpg30  
 TD 32768  
 SOLVENT CDCl<sub>3</sub>  
 NS 4  
 DS 2  
 SMH 10964.912 Hz  
 FIDRES 0.334623 Hz  
 AQ 1.4943165 sec  
 RG 128  
 DW 45.600 usec  
 DE 6.50 usec  
 TE 295.2 K  
 D1 2.00000000 sec  
 d12 0.00002000 sec  
 D16 0.00020000 sec  
 TDO 1

----- CHANNEL f1 -----  
 MUC1 1H  
 P1 14.80 usec  
 P2 29.60 usec  
 P12 2000.00 usec  
 PLO 120.00 dB  
 PL1 -1.40 dB  
 SFO1 500.1305501 MHz  
 SP1 35.19 dB  
 SFOH1 Squal00.1000  
 SFOAL1 0.500  
 SPOFFS1 0.00 Hz

----- GRADIENT CHANNEL -----  
 GPMH1 SINE.100  
 GPMH2 SINE.100  
 GP21 31.00 %  
 GP22 11.00 %  
 P16 1000.00 usec

F2 - Processing parameters  
 SI 32768  
 SF 500.1300182 MHz  
 WDW EN  
 SSB 0  
 LB 0.50 Hz  
 GB 0  
 PC 1.00

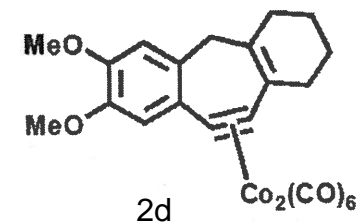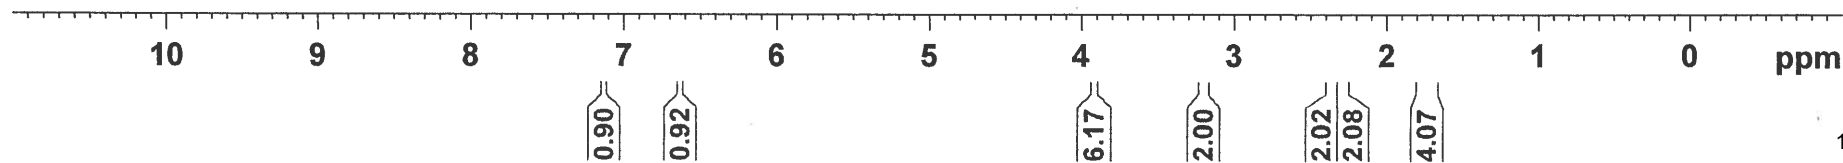

Dimethoxy-1,2-Cyclohexeneacetat-4 Co<sub>2</sub>(CO)<sub>6</sub> Nicholas  
 Experiment 3 Topspin 500  
 Wednesday 09 February 2011

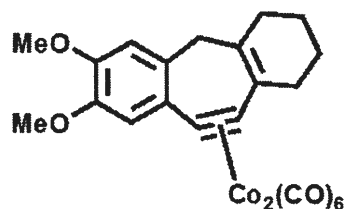

Current Data Parameters  
 NAME Dimethoxy-1,2-Cyclohexeneacetat-4 Co<sub>2</sub>(CO)<sub>6</sub> Nicholas  
 EXENO 3  
 PROCNO 1

F2 - Acquisition Parameters  
 Date 20110209  
 Time 4.32  
 INSTRUM spect  
 PROBHD 5 mm PABBO BB/  
 PULPROG zgpg30  
 TD 16384  
 SOLVENT CDCl<sub>3</sub>  
 NS 83  
 DS 4  
 SMH 62893.082 Hz  
 FIDRES 3.838689 Hz  
 AQ 0.1303107 sec  
 RG 1145.4  
 DW 7.950 usec  
 DE 6.50 usec  
 TE 293.2 K  
 D1 5.00000000 sec  
 d11 0.03000000 sec  
 DELTA 4.90000010 sec  
 TDO 1

----- CHANNEL f1 -----  
 NUC1 13C  
 P1 9.50 usec  
 PL1 -0.70 dB  
 SFO1 125.7577890 MHz

----- CHANNEL f2 -----  
 CPDPRG2 waltz16  
 NUC2 1H  
 PCPD2 70.00 usec  
 PL2 -1.20 dB  
 PL12 12.30 dB  
 PL13 15.30 dB  
 SFO2 500.1325010 MHz

F2 - Processing parameters  
 SI 32768  
 SF 125.7577890 MHz  
 WDW EM  
 SSB 0  
 LB 3.00 Hz  
 GB 0  
 PC 1.40

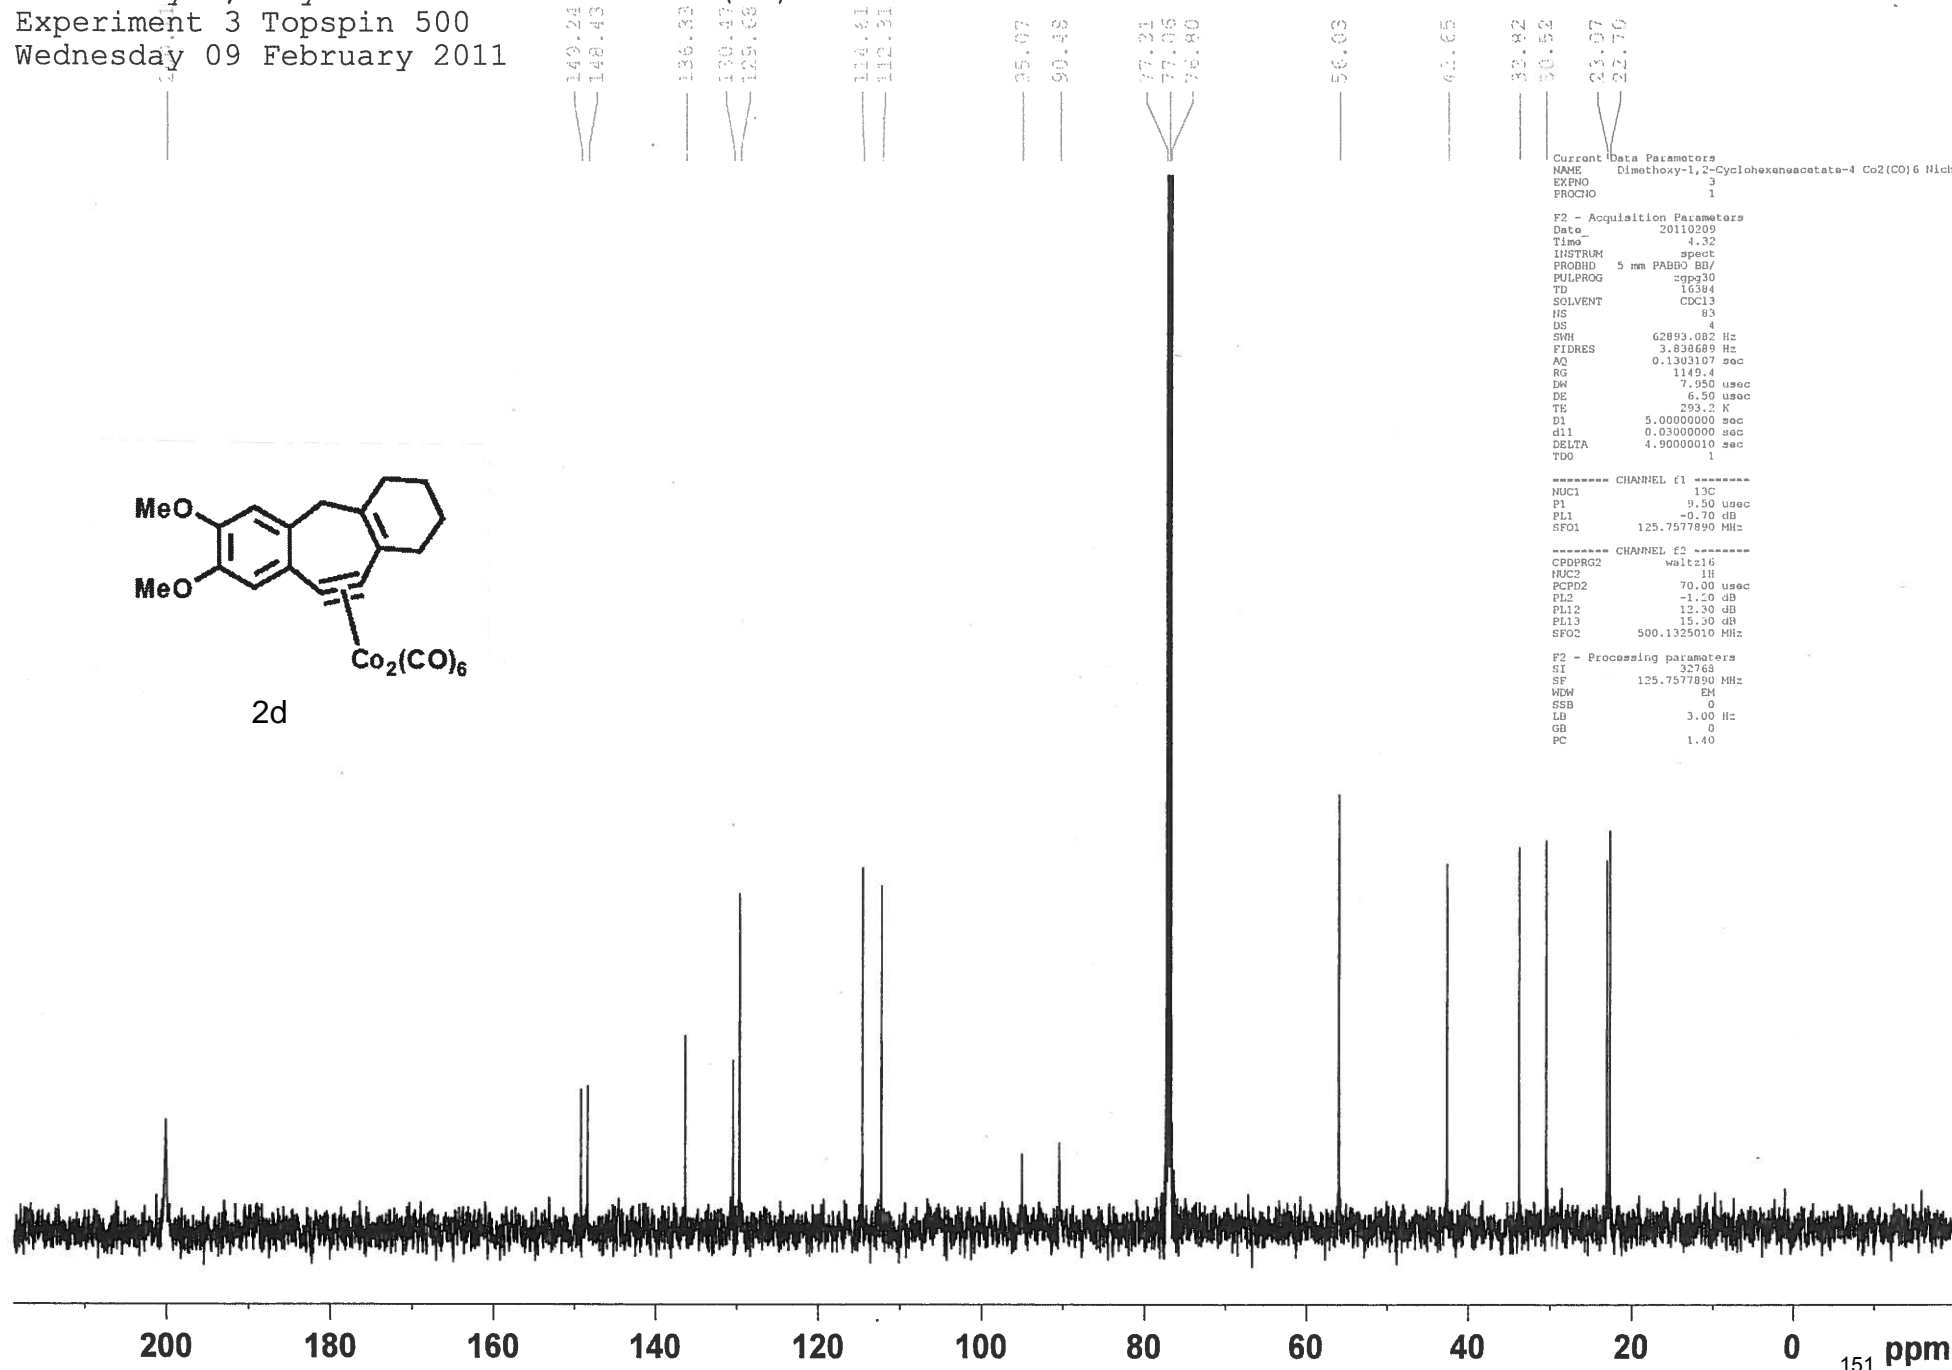

Dimethoxy-1,2-CyclohexeneCyclized Minor  
 Experiment 2 Topspin 500 3.2  
 Thursday 11 April 2013

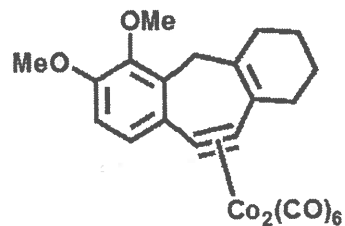

2d'

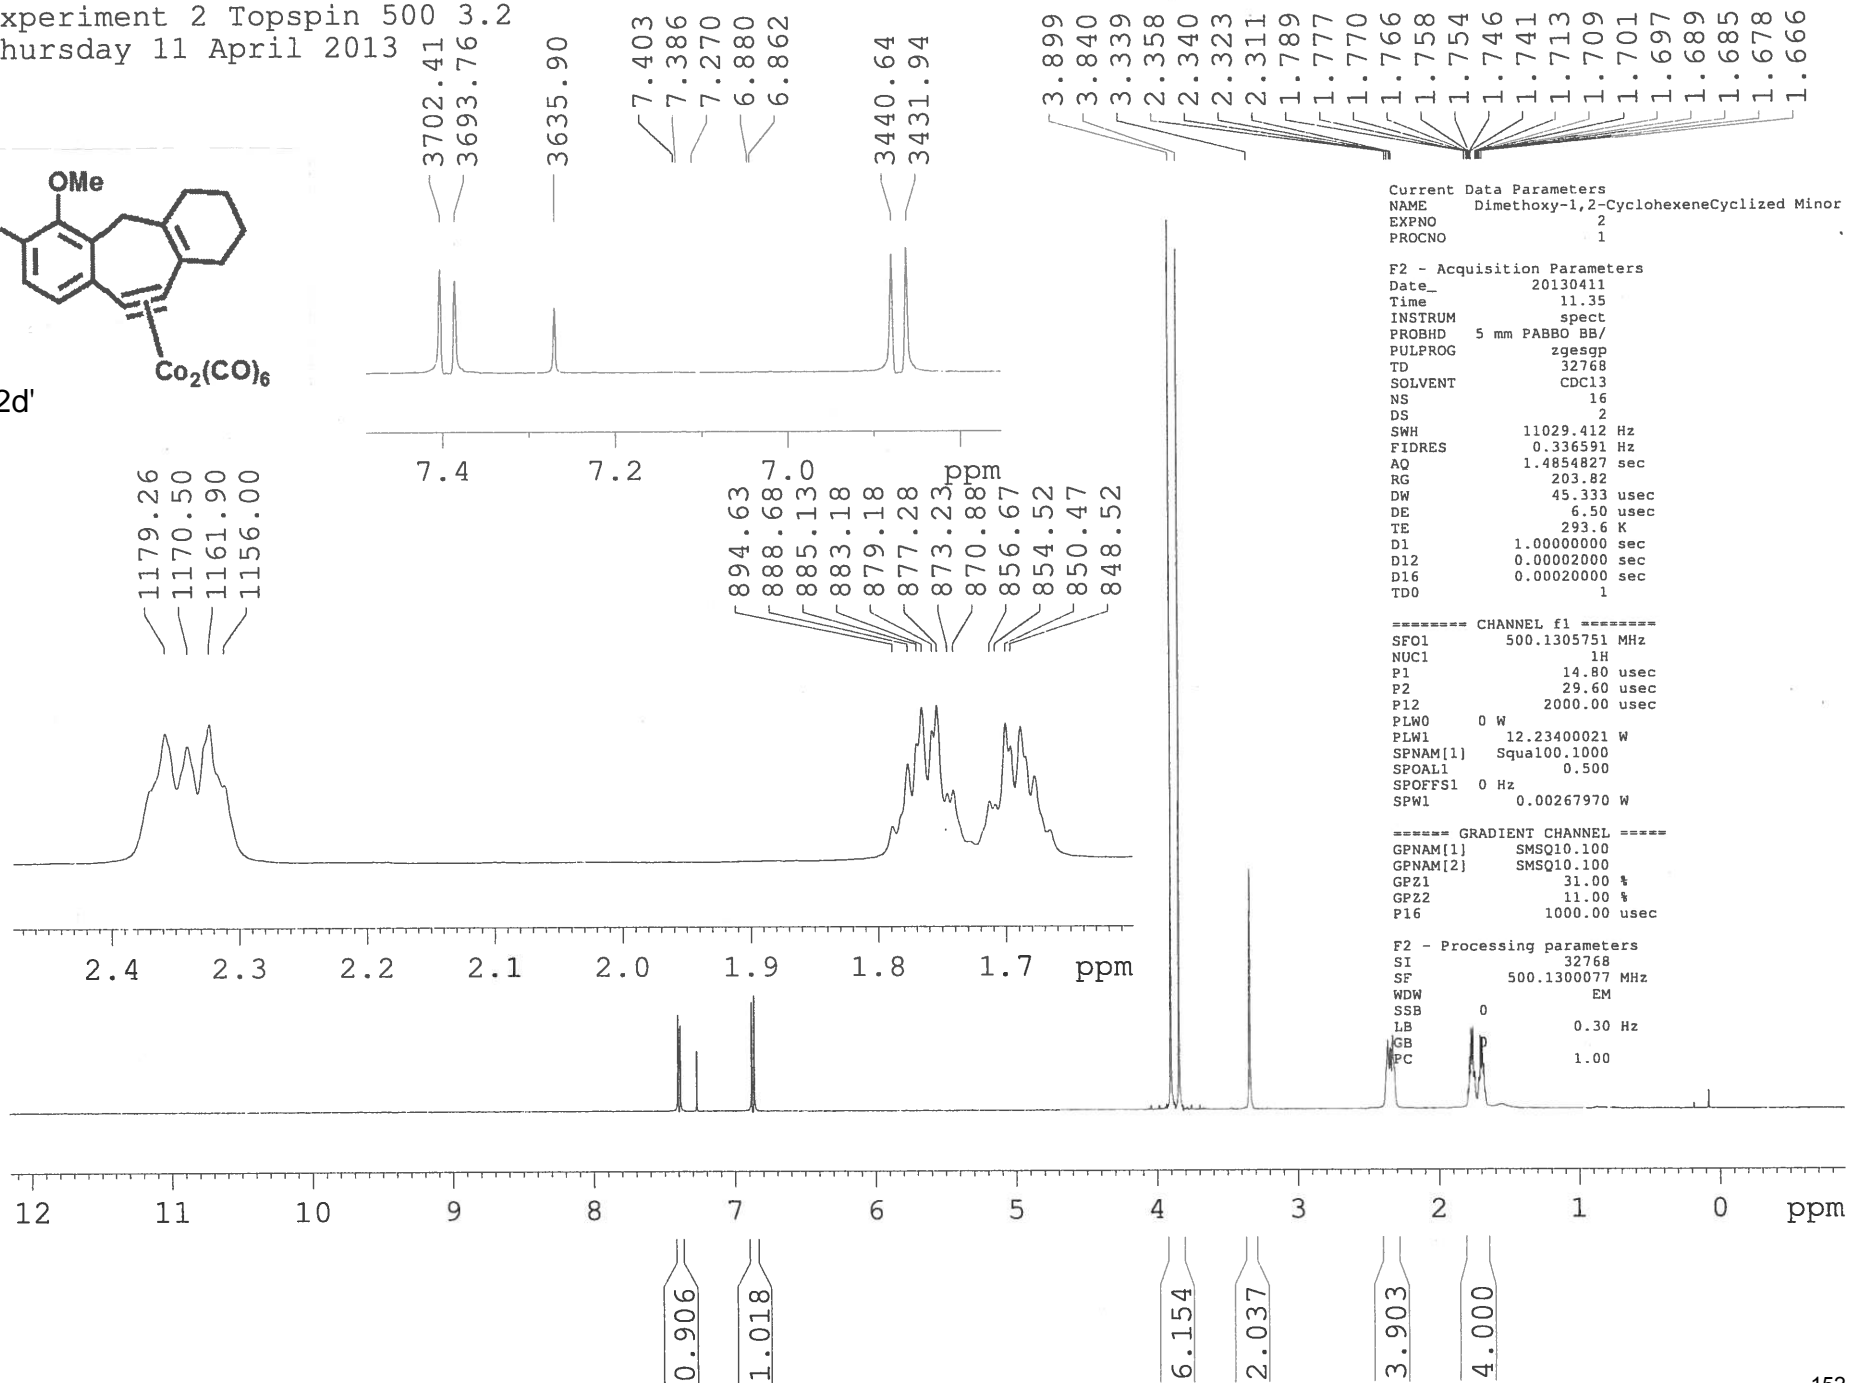

Dimethoxy-1,2-CC-Cyclohexene-4-Cyclized Minor  
 Experiment 2  
 Topspin 300  
 Friday 12 April 2013

Current Data Parameters  
 NAME Dimethoxy-1,2-CC-Cyclohexene-4 Cyclized Minor  
 EXPNO 2  
 PROCNO 1

F2 - Acquisition Parameters  
 Date\_ 20130413  
 Time 12.23  
 INSTRUM spect  
 PROBHD 5 mm BBO BB-1H  
 PULPROG zgpg30  
 TD 32768  
 SOLVENT CDCl3  
 NS 10692  
 DS 4  
 SWH 17985.611 Hz  
 FIDRES 0.548877 Hz  
 AQ 0.9110004 sec  
 RG 2896.3  
 DW 27.800 usec  
 DE 6.00 usec  
 TE 300.0 K  
 D1 1.20000005 sec  
 d11 0.03000000 sec  
 DELTA 1.10000002 sec  
 TDO 1

\*\*\*\*\* CHANNEL f1 \*\*\*\*\*  
 NUC1 13C  
 P1 14.00 usec  
 PL1 0.00 dB  
 SFO1 75.5004428 MHz

\*\*\*\*\* CHANNEL f2 \*\*\*\*\*  
 CPDPRG2 waltz16  
 NUC2 1H  
 PCPD2 70.00 usec  
 PL2 0.00 dB  
 PL12 14.10 dB  
 PL13 19.11 dB  
 SFO2 300.2323000 MHz

F2 - Processing parameters  
 SI 32768  
 SF 75.4928917 MHz  
 WDW EM  
 SSB 0  
 LB 2.00 Hz  
 GB 0  
 PC 1.40

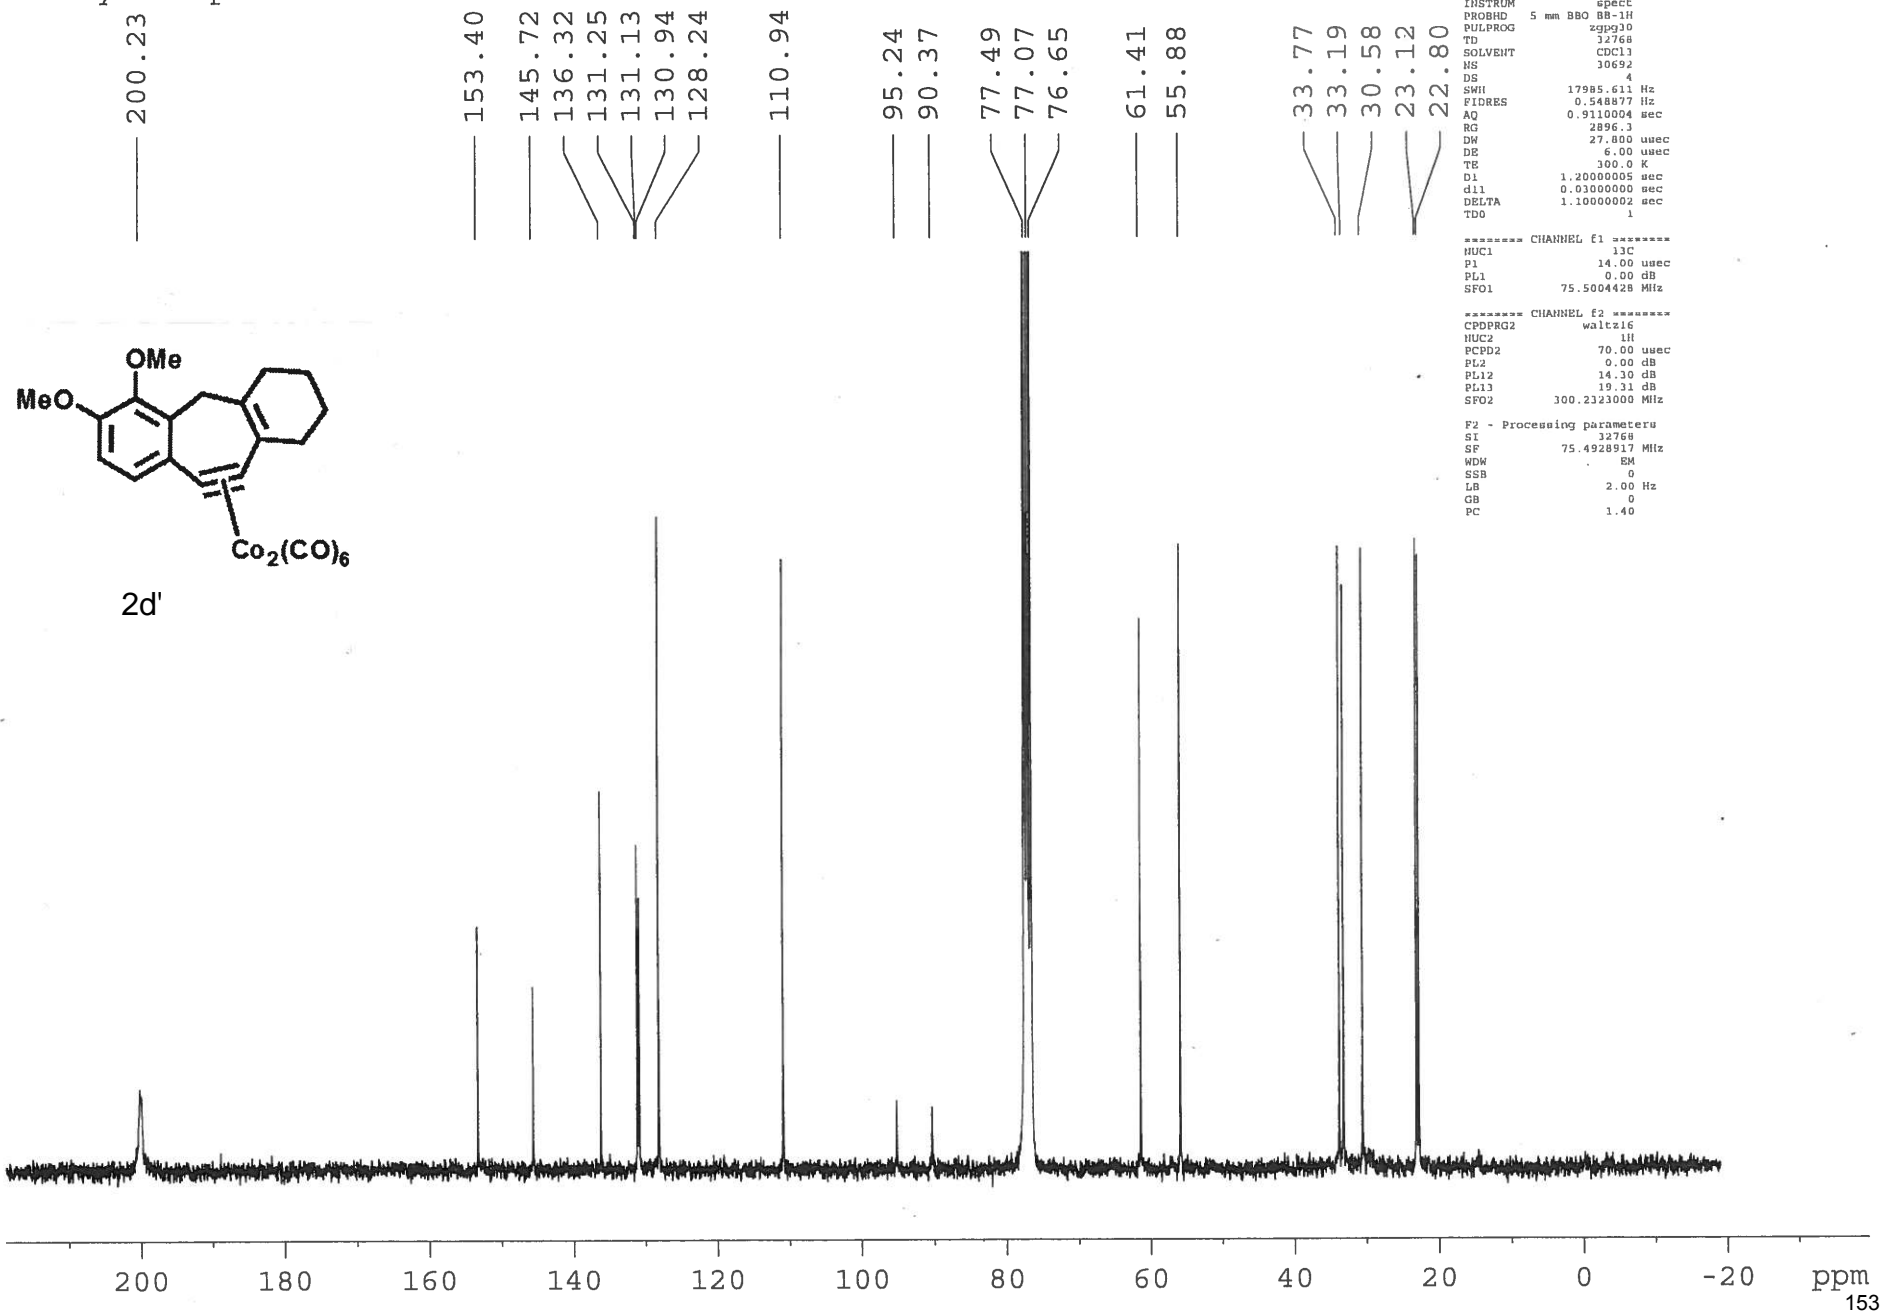

Dimethoxy-1,3-CC-CyclopenteneOAc-5 Co<sub>2</sub>(CO)<sub>6</sub> Cyclized  
 Experiment 2  
 Topspin 5.00  
 Thursday, 01 December 2011

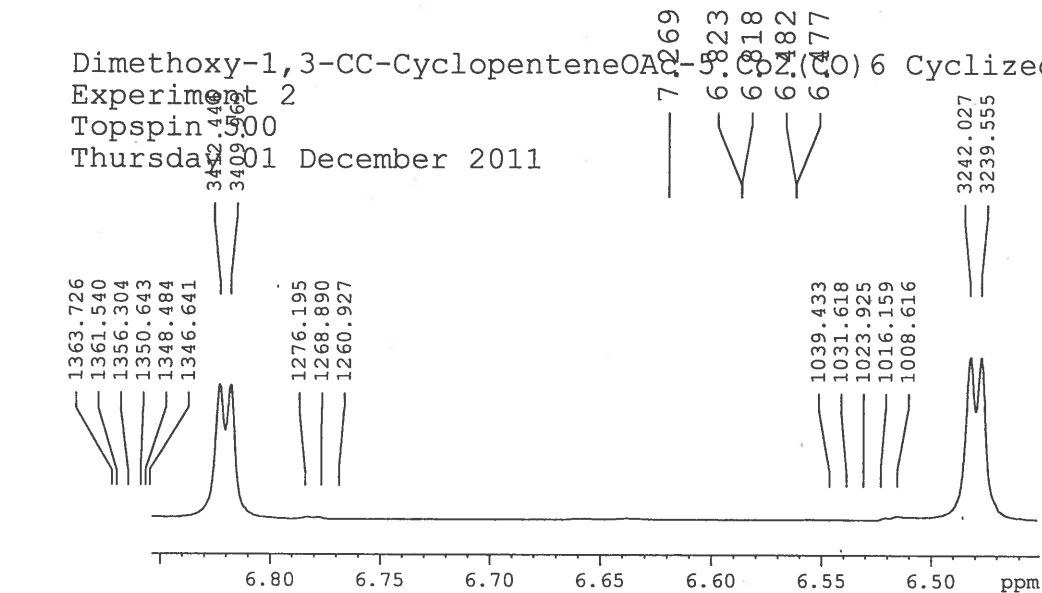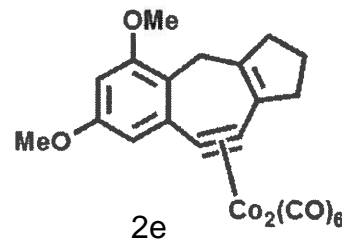

Current Data Parameters  
 NAME Dimethoxy-1,3-CC-CyclopenteneOAc-5 Co<sub>2</sub>(CO)<sub>6</sub> Cyclized  
 EXPNO 2  
 PROCNO 1

F2 - Acquisition Parameters  
 Date 20111201  
 Time 15.01  
 INSTRUM spect  
 PROBHD 5 mm Multinucl  
 PULPROG zgpg30  
 TD 32768  
 SOLVENT C6D6  
 NS 8  
 DS 2  
 SWH 10964.912 Hz  
 FIDRES 0.334623 Hz  
 AQ 1.4943165 sec  
 RG 128  
 DW 45.600 usec  
 DE 6.50 usec  
 TE 294.2 K  
 D1 2.00000000 sec  
 d12 0.00002000 sec  
 D16 0.00020000 sec  
 TDO 1

----- CHANNEL f1 -----  
 NUC1 1H  
 P1 14.80 usec  
 p2 29.60 usec  
 P12 2000.00 usec  
 PLO 120.00 dB  
 PL1 -1.40 dB  
 SFO1 500.1305501 MHz  
 SP1 35.19 dB  
 SPNAM1 Squa100.1000  
 SFOAL1 0.500  
 SPOFFS1 0.00 Hz  
 ----- GRADIENT CHANNEL -----  
 GPNAM1 SINE.100  
 GPNAM2 SINE.100  
 GPZ1 31.00 %  
 GPZ2 11.00 %  
 P16 1000.00 usec

F2 - Processing parameters  
 SI 32768  
 SF 500.1300194 MHz  
 WDW EM  
 SSB 0  
 LB 1.00 Hz  
 GB 0  
 PC 1.00

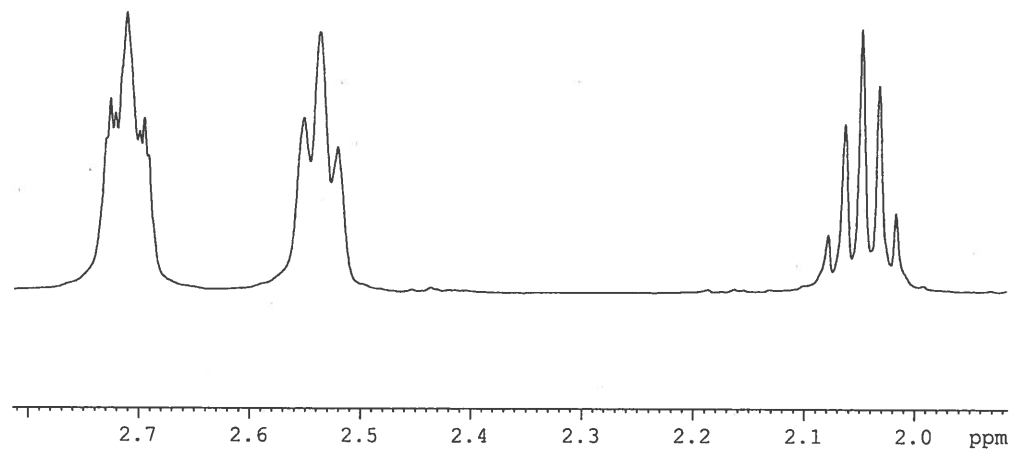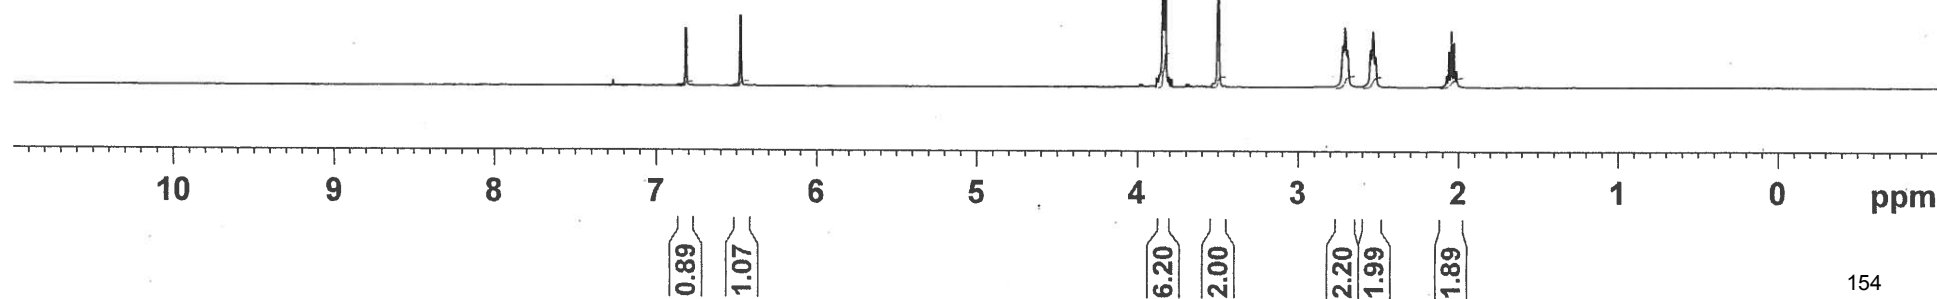

methoxy-1,3-CC-CyclopenteneOAc-5 Co<sub>2</sub>(CO)<sub>6</sub> Cyclized 13C  
periment 1 Topspin Ultra 300  
nday 04 December 2011

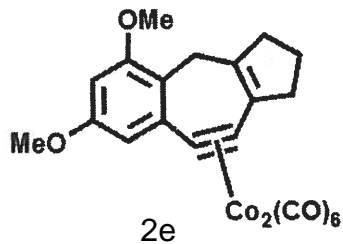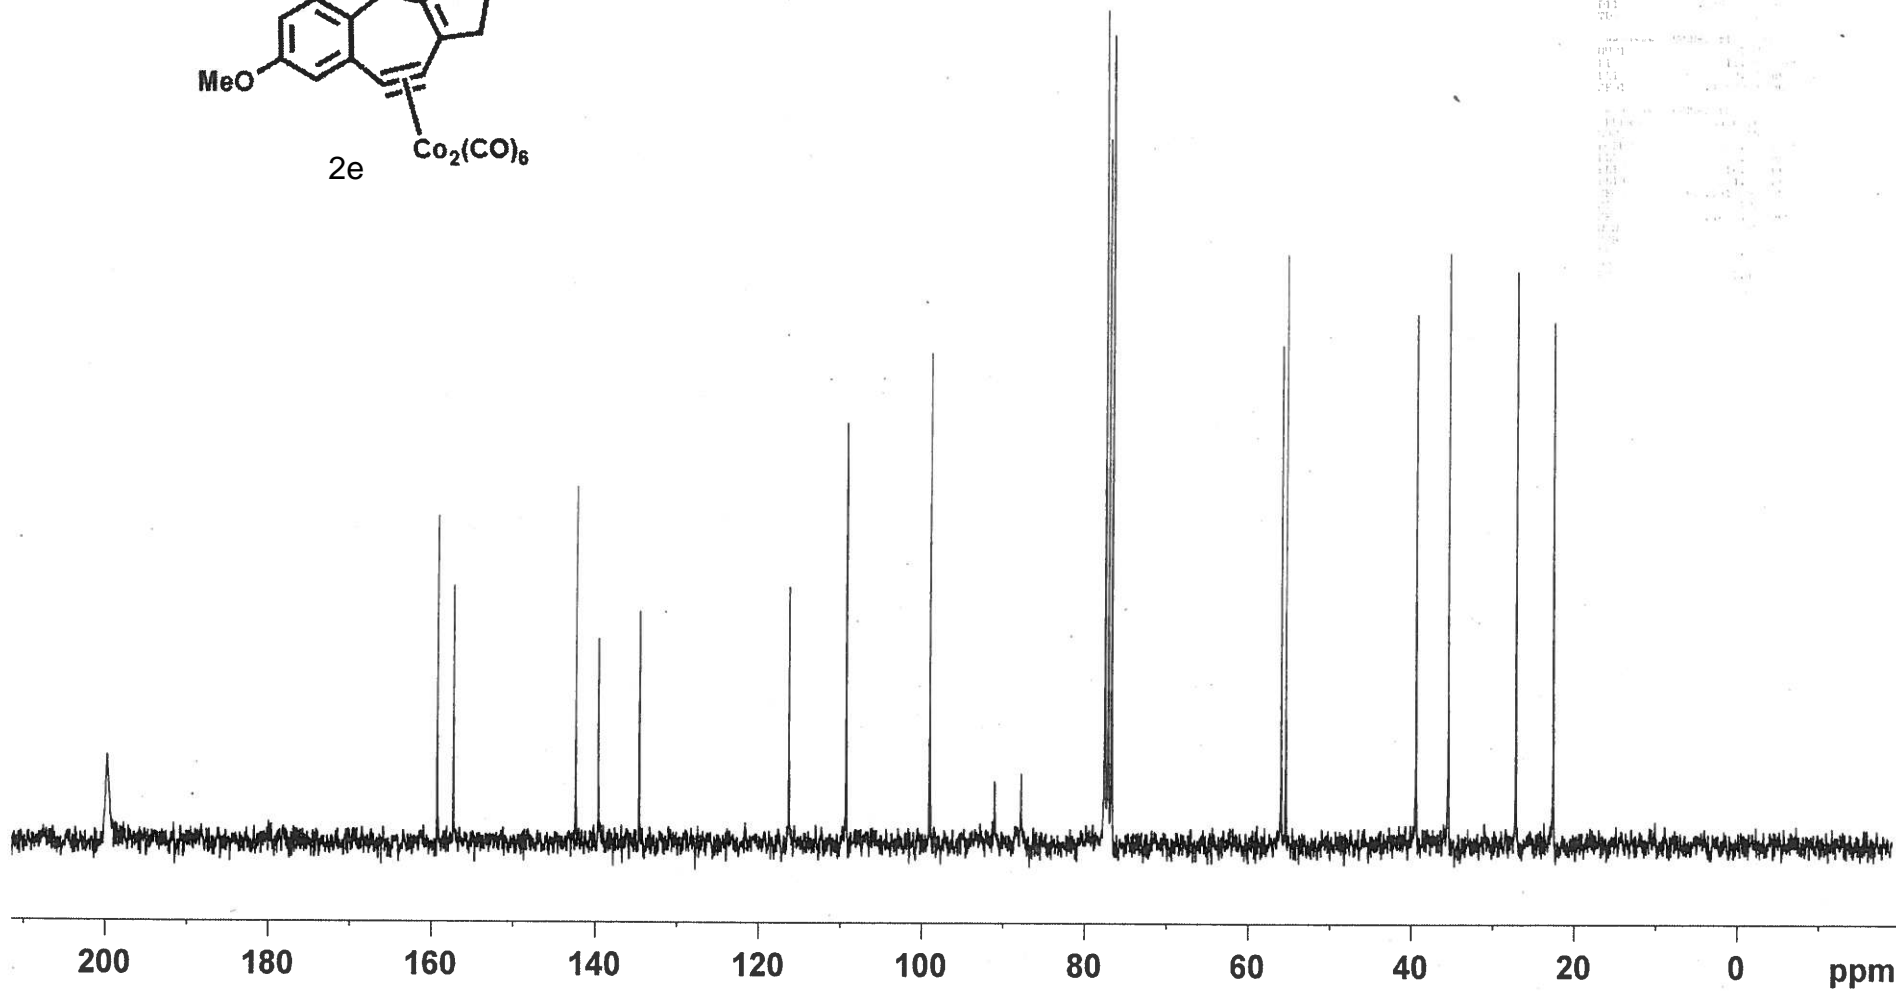

Dimethoxy-1,3-CC-CyclohexeneCH2OAc-5 Co2(CO)6 Cyclized  
 Topspin 500 Experiment 4  
 Friday 27 May 2011

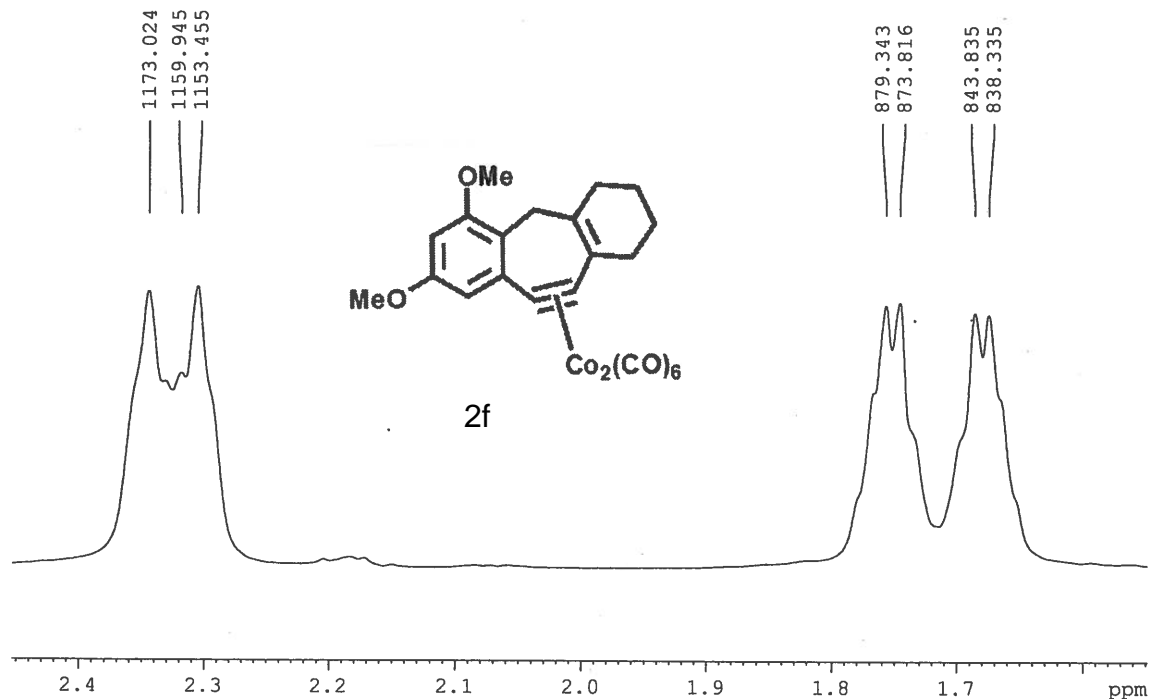

Current Data Parameters  
 NAME Dimethoxy-1,3-CC-CyclohexeneCH2OAc-5 Co2(CO)6 Cyclized  
 EXPNO 4  
 PROCNO 1

F2 - Acquisition Parameters  
 Date\_ 20110527  
 Time 12.09  
 INSTRUM spect  
 PROBHD 5 mm PABBO BB/  
 PULPROG zgpg30  
 TD 32768  
 SOLVENT C6D6  
 NS 16  
 DS 2  
 SWH 10964.912 Hz  
 FIDRES 0.334623 Hz  
 AQ 1.4943165 sec  
 RG 143.7  
 DM 45.600 usec  
 DE 6.50 usec  
 TE 294.2 K  
 D1 2.00000000 sec  
 d12 0.00000000 sec  
 D16 0.06000000 sec  
 TD0 1

===== CHANNEL f1 =====  
 NUCL1 1H  
 P1 14.00 usec  
 P2 29.60 usec  
 P12 2000.00 usec  
 PL0 120.00 dB  
 PL1 -1.40 dB  
 SFO1 500.130001 MHz  
 SFO2 500.130001 MHz  
 SF1 500.130001 MHz  
 SF2 500.130001 MHz  
 SFOFF1 0.500  
 SFOFF2 0.500 Hz

===== GRADIENT CHANNEL =====  
 GPM1 1H  
 GPM2 1H  
 GPC1 31.00 usec  
 GPC2 31.00 usec  
 PLG 1000.00 usec

F2 - Processing parameters  
 SI 32768  
 SF 500.1300129 MHz  
 WDW EM  
 SSB 0  
 LB 0.00 Hz  
 GB 0  
 PC 1.00

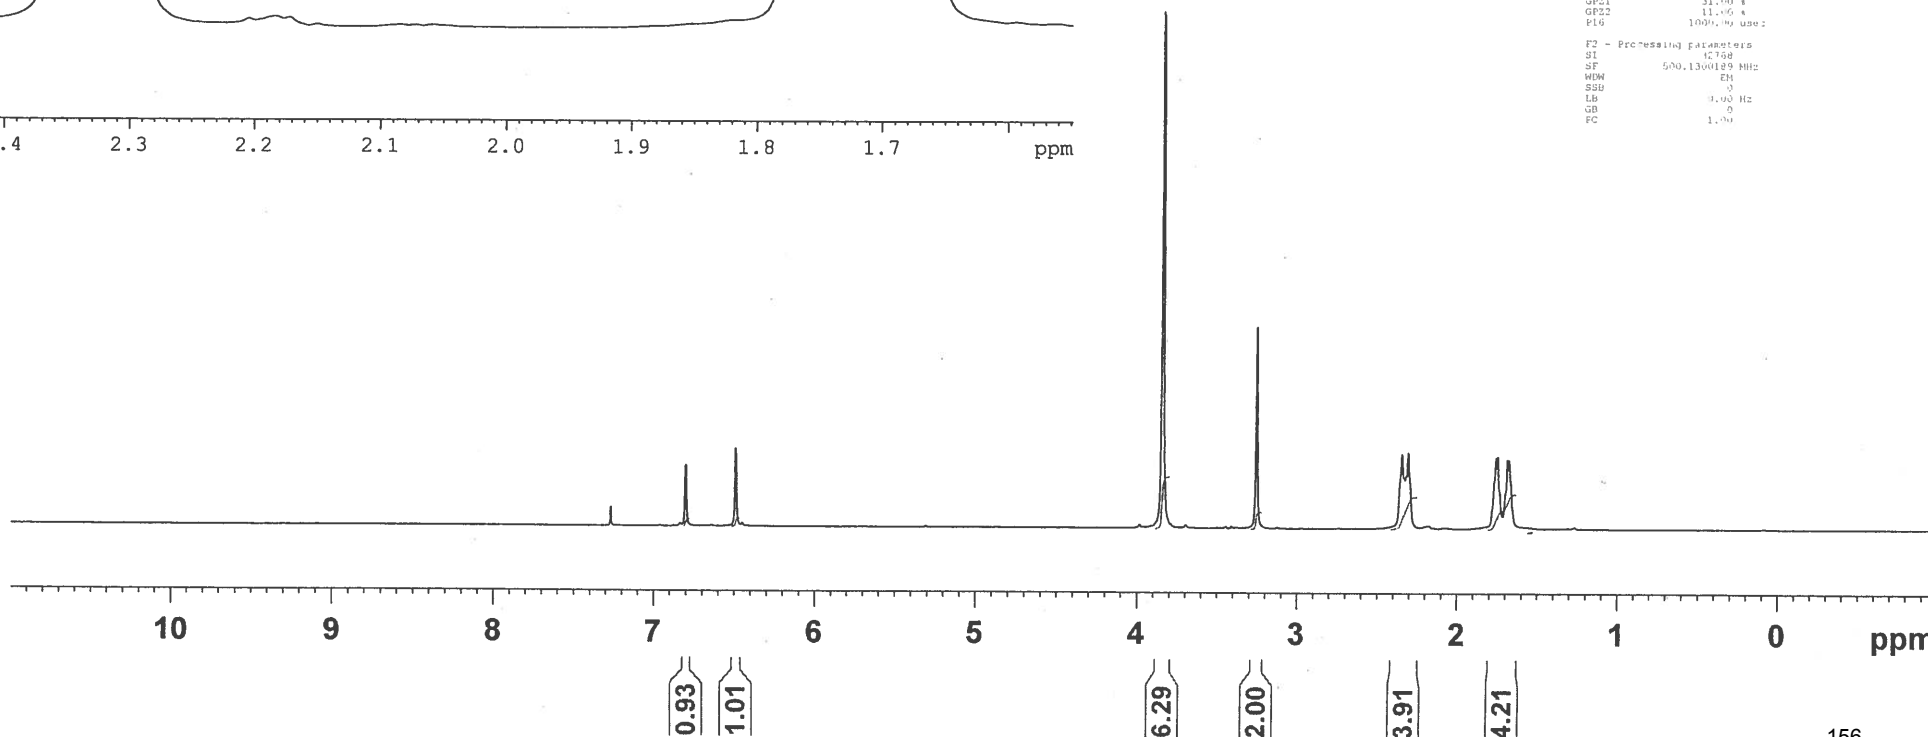



Dimethoxy-1,3-CC-CyclohexeneCH2OAc-5-Co2(CO)6 Cyclized  
 13C  
 Topspin 500 Experiment 5  
 Friday 27 May 2011

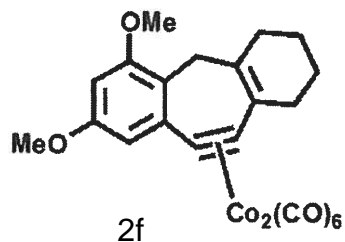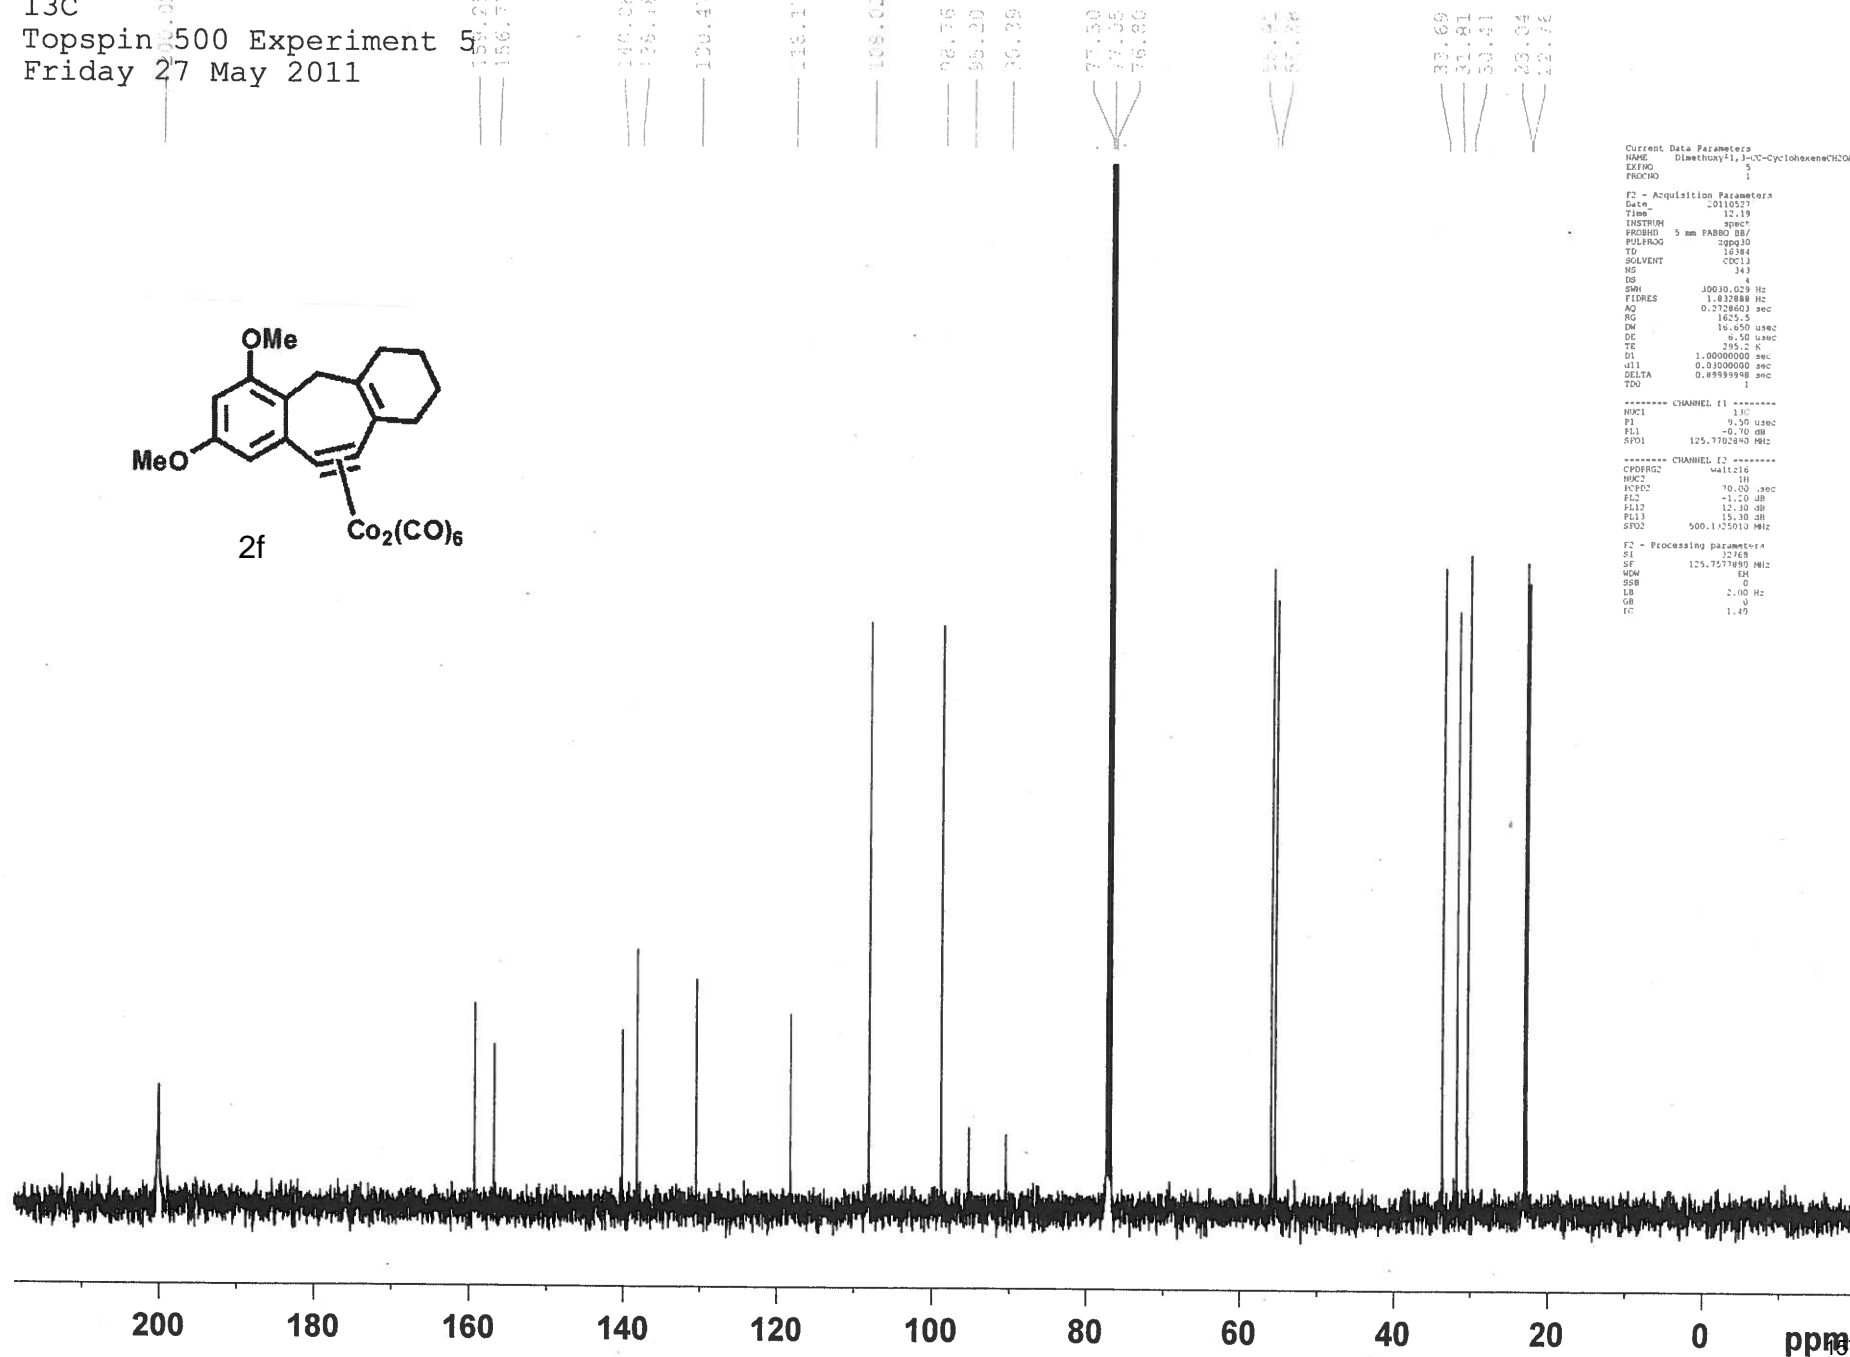

Current Data Parameters  
 NAME Dimethoxy-1,3-CC-CyclohexeneCH2OAc-5-Co2(CO)6 Cyclized  
 EXPNO 5  
 PROCNO 1  
 F2 - Acquisition Parameters  
 Date\_ 011027  
 Time 12.19  
 INSTRUM spect  
 PROBHD 5 mm PABBO BB/  
 PULPROG zgpg30  
 TD 16384  
 SOLVENT CDCl3  
 NS 343  
 DS 4  
 SWH 10030.023 Hz  
 FIDRES 1.832888 Hz  
 AQ 0.2728603 sec  
 RG 1625.5  
 DM 16.650 usec  
 DE 6.50 usec  
 TE 295.2 K  
 D1 1.00000000 sec  
 d11 0.00000000 sec  
 DELTA 0.89999998 sec  
 TDO 1  
 ----- CHANNEL f1 -----  
 NUC1 13C  
 P1 9.50 usec  
 PL1 -0.70 dB  
 SFO1 125.767890 MHz  
 ----- CHANNEL f2 -----  
 CPDPRG2 waltz16  
 NUC2 1H  
 PCPD2 70.00 usec  
 PL2 -1.20 dB  
 PL12 12.00 dB  
 PL13 15.30 dB  
 SFO2 500.1325010 MHz  
 F2 - Processing parameters  
 SI 32768  
 SF 125.7577889 MHz  
 NQW 0  
 SSB 0  
 LB 2.00 Hz  
 GB 0  
 FC 1.40

1360.611  
1358.314  
1353.128  
1347.456  
1345.579

Dimethoxy-1,4-Cyclopenteneacetate-2  
Experiment 4 Topspin 500  
Wednesday 20 July 2011

1269.286  
1261.727  
1253.959

7.270  
6.910  
6.892  
6.747  
6.729

5.037.132  
5.029.492  
5.021.841  
5.014.103  
5.006.612

3.856  
3.802  
3.585  
2.720  
2.716  
2.706  
2.694  
2.691  
2.538  
2.523  
2.507  
2.074  
2.058  
2.043  
2.028  
2.013

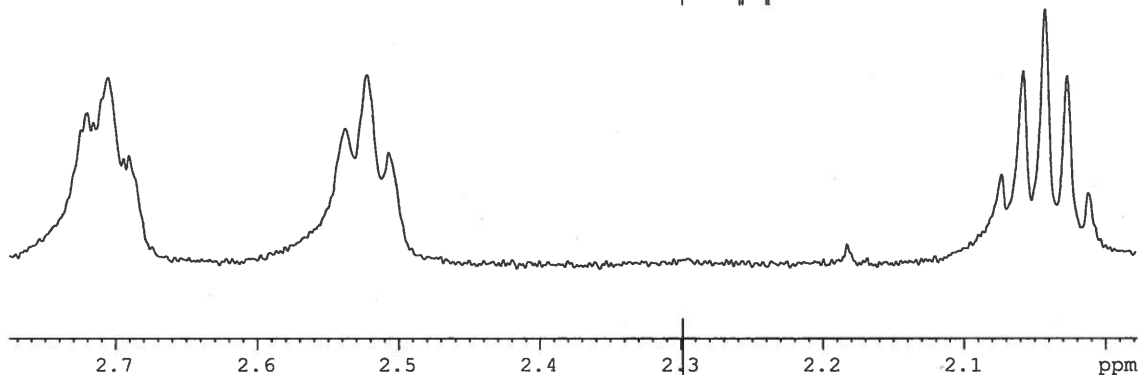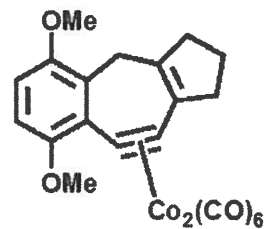

Current Data Parameters  
NAME: Dimethoxy-1,4-Cyclopenteneacetate-2 Co2(CO)6 Nicholas  
EXPNO: 4  
PROCNO: 1

F2 - Acquisition Parameters  
Date\_: 20110720  
Time\_: 14.31  
INSTRUM: spect  
PROBHD: 5 mm F4BBO BB/  
PULPROG: zgpg30  
TD: 32768  
SOLVENT: CDCl3  
NS: 8  
DS: 2  
SWH: 10964.912 Hz  
FIDRES: 0.334623 Hz  
AQ: 1.4943165 sec  
RG: 1448.2  
DN: 45.600 usec  
DE: 6.50 usec  
TE: 296.2 K  
D1: 2.00000000 sec  
d12: 0.00002000 sec  
D16: 0.00020000 sec  
TD0: 1

===== CHANNEL f1 =====  
NUC1: 1H  
P1: 14.00 usec  
P2: 29.60 usec  
P12: 2000.00 usec  
PL0: 1.00 dB  
PL1: 1.40 dB  
SFO1: 500.130591 MHz  
SF1: 35.19 dB  
SFOH1: Squal100.1000  
SFOH11: 0.500  
SPOFFS1: 0.00 Hz

===== GRADIENT CHANNEL =====  
GPHAM1: SINE.100  
GPHAM2: SINE.100  
GP21: 31.00 %  
GP22: 11.00 %  
PL6: 1000.00 usec

F2 - Processing parameters  
SI: 32768  
SF: 500.130591 MHz  
WFI: no  
SSB: 0  
LR: 0.00 Hz  
GB: 0  
PC: 1.00

3456.007  
3446.990  
3374.485  
3365.465

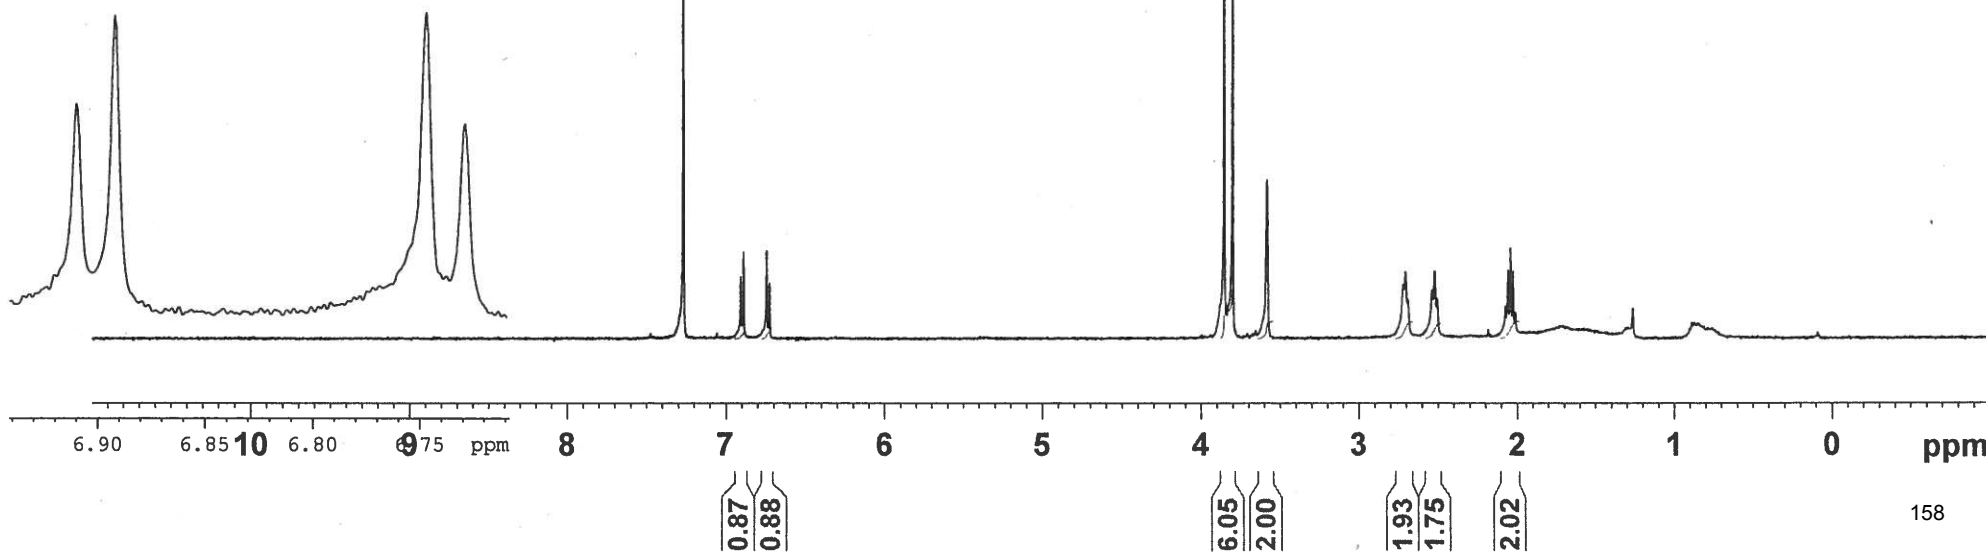

Dimethoxy-1,4-CyclohexeneCyclized  
 Experiment 2 Topspin 500 V3.2  
 Tuesday 27 August 2013

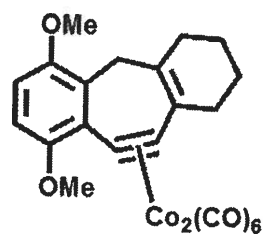

2h

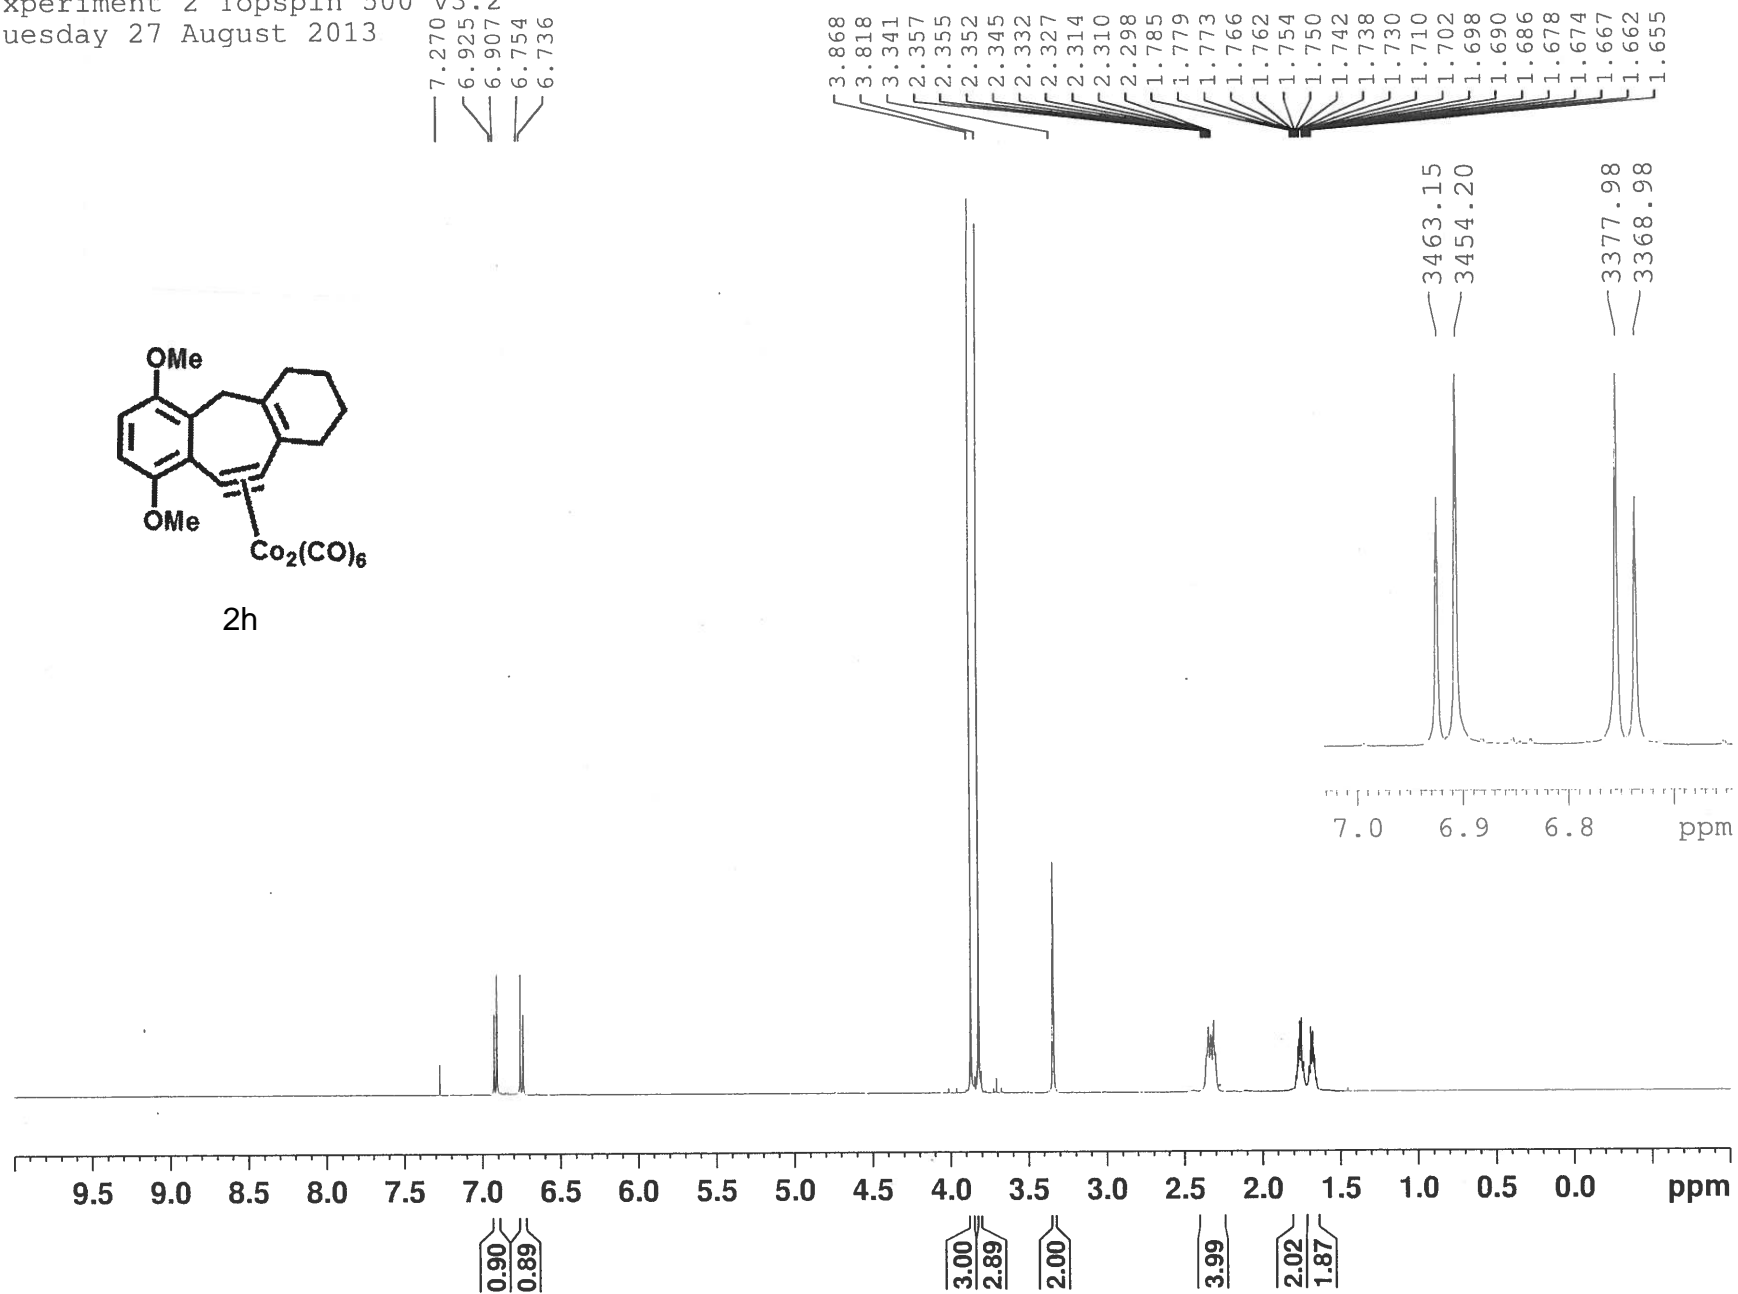

Dimethoxy-1,4-CyclohexeneOAc-2 Nicholas 13C  
 Experiment 2 Topspin 300  
 Tuesday 03 September 2013

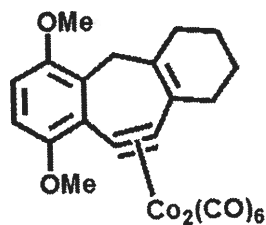

2h

```

Current Data Parameters
NAME      Dimethoxy-1,4-CyclohexeneOAc-2 Nicholas 13C
EXPNO     2
PROCNO    1

F2 - Acquisition Parameters
Date_     20110903
Time      22.01
INSTRUM   spect
PROBHD    5 mm BBO BB-1H
PULPROG   zgpg30
TD        32768
SOLVENT   CDCl3
NS        4381
DS        4
SWH       17985.611 Hz
FIDRES    0.548877 Hz
AQ        0.9110004 sec
RG        4096
DW        27.800 usec
DE        6.00 usec
TE        300.0 K
D1        1.20000005 sec
d11       0.03000000 sec
DELTA     1.10000002 sec
TD0       1

===== CHANNEL f1 =====
NUC1      13C
P1        14.00 usec
PL1       0.00 dB
SFO1      75.5004428 MHz

===== CHANNEL f2 =====
CPDPRG2   waltz16
NUC2      1H
PCPD2     70.00 usec
PL2       0.00 dB
PL12      14.30 dB
PL13      19.11 dB
SFO2      300.2321000 MHz

F2 - Processing parameters
SI        32768
SF        75.4928917 MHz
WDW       EM
SSB       0
LB        2.00 Hz
GB        0
PC        1.40
  
```

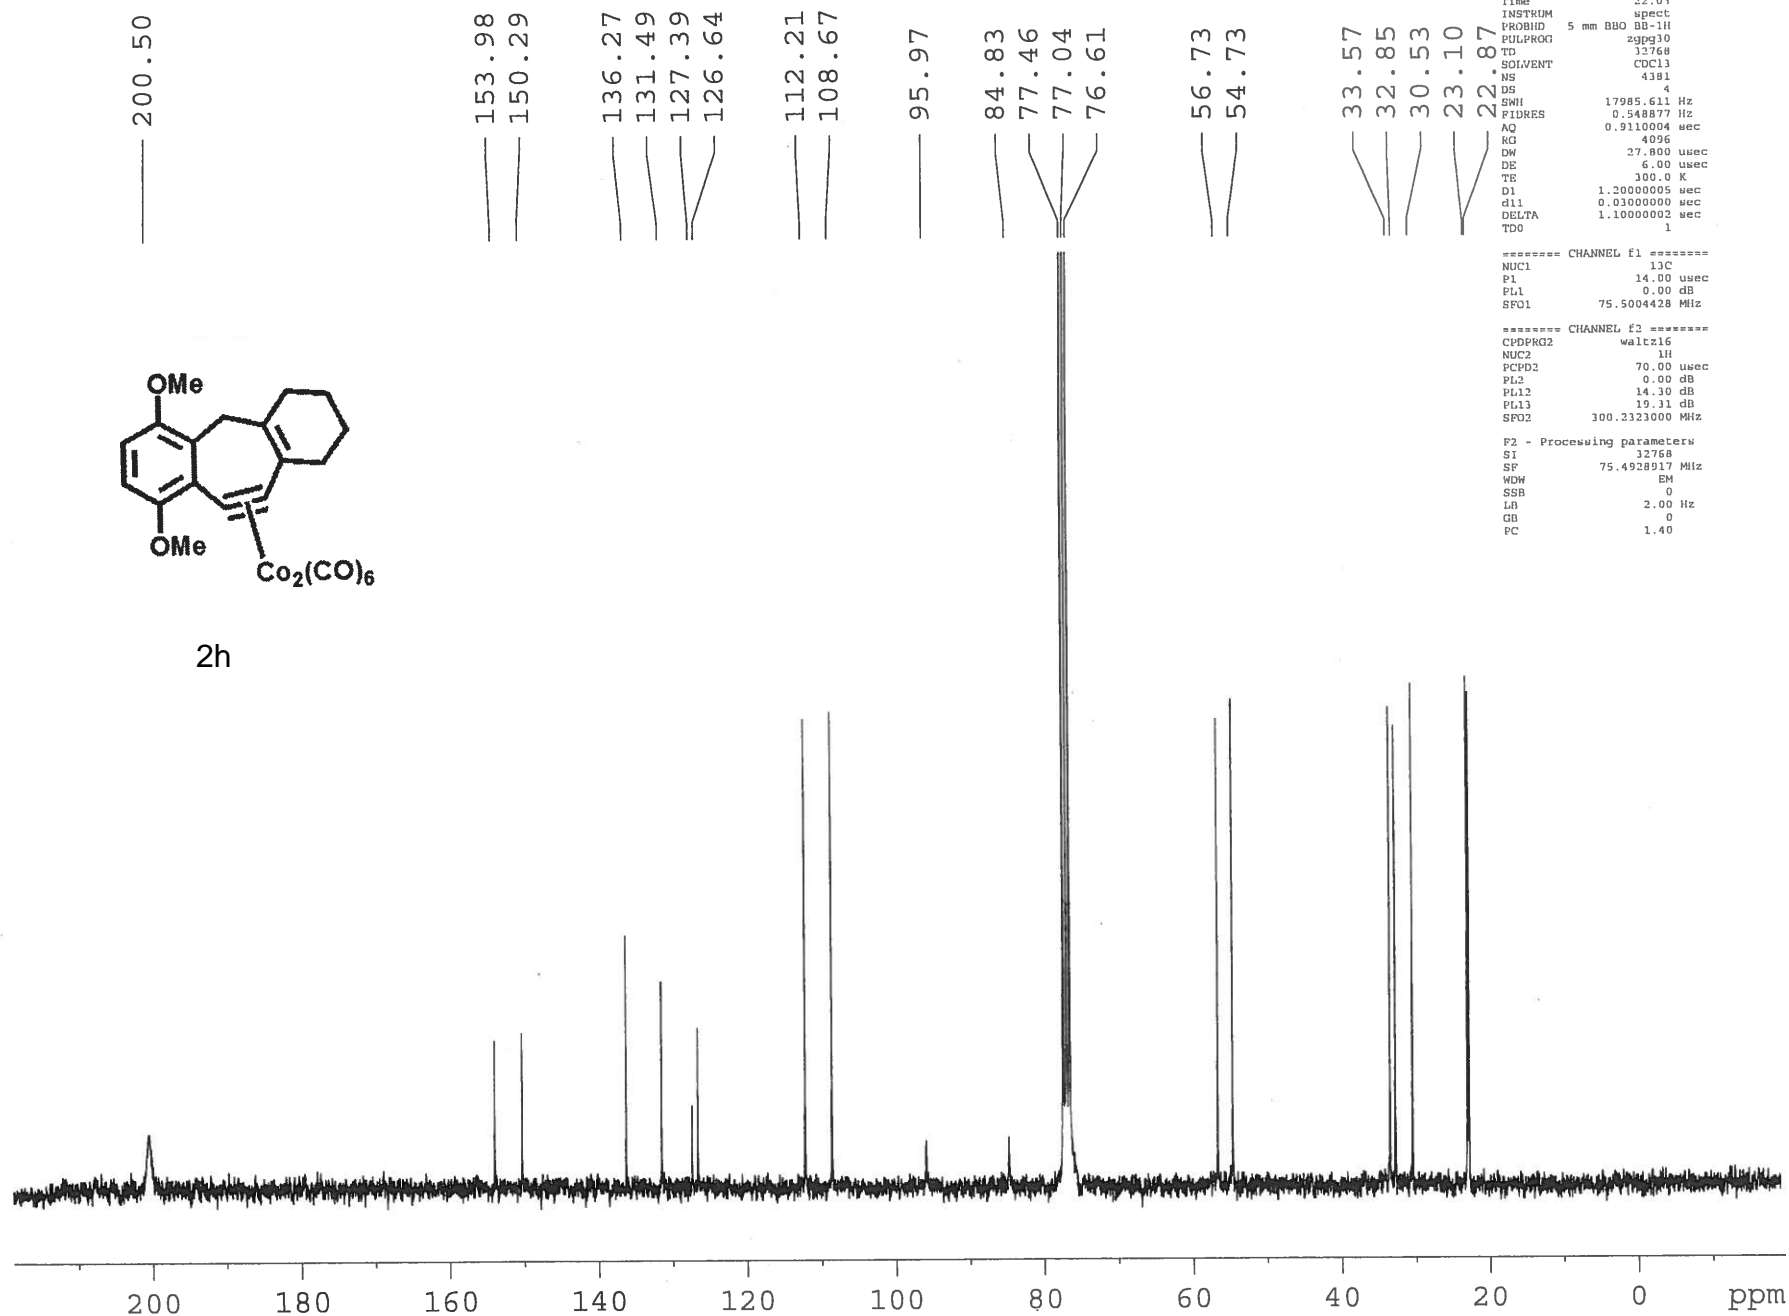

2  
Co  
2  
(Co)  
6

| Year | Population (millions) |
|------|-----------------------|
| 1960 | 3.861                 |
| 1965 | 3.817                 |
| 1970 | 3.404                 |
| 1975 | 2.565                 |
| 1980 | 2.554                 |
| 1985 | 2.542                 |
| 1990 | 2.532                 |
| 1995 | 2.520                 |
| 2000 | 1.801                 |
| 2005 | 1.789                 |
| 2010 | 1.777                 |
| 2015 | 1.765                 |
| 2020 | 1.753                 |
| 2025 | 1.669                 |
| 2030 | 1.657                 |
| 2035 | 1.647                 |
| 2040 | 1.636                 |
| 2045 | 1.623                 |
| 2050 | 1.611                 |
| 2055 | 1.599                 |
| 2060 | 1.588                 |
| 2065 | 1.577                 |
| 2070 | 1.565                 |

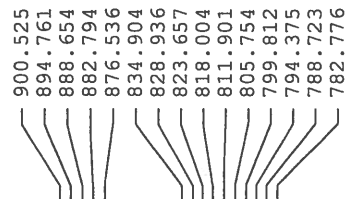

```
Current Data Parameters
NAME          Dimethoxy-1,4-Cyclohepten-2-ol-2 Co2(CO)6 Nicholas
EQUIP        PROCHO
F2 - Acquisition Parameters
Date         20010129
Time         16:35
INSTRUM      spect
PROBHD       5 mm FAPBO 100/
PULPROG      zgpg30
TD           32768
SOLVENT      H2O
NS           8
DS           2
SWH          10664.912 MHz
FIDRES       0.234033 Hz
AQ           1.9493155 sec
RG           645.1
RGW          65.0000 usec
DE           6.50 usec
TE           299.2 K
D1           2.00000000 sec
D12          0.00000000 sec
D16          0.00000000 sec
TD0          1
----- CHANNEL f1 -----
NUC1         13
P1           14.80 usec
PL1          23.00 dB
PL12         2000.00 usec
PL0          120.00 dB
PL11         -1.40 dB
SFO1         500.1305001 MHz
NUC11        31
STW1H        Equal100.1500
SFO1H1       500.1305001 MHz
SFOFF1       0.00 Hz
----- GRADIENT CHANNEL -----
GPH1H1       SINE.100
GPH1H2       SINE.100
GPH1H3       SINE.100
GP1          31.00 A
GP2          31.00 A
GP22         1000.00 usec
F2 - Processing parameters
S1           32768
STF          500.1300180 MHz
VIEW         RM
SUB          0
LB           1.00 MHz
GB           0
PC           1.00
```

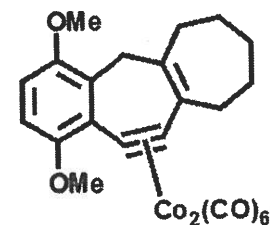

2i

Dimethoxy-1,4-CyclohepteneOAc-2 Nicholas  
 Experiment 1 300  
 Thursday 10 November 2011

200.55

153.85

150.18

141.66

136.76

127.07

126.71

112.29

108.53

97.68

85.50

77.47

77.05

76.63

56.81

54.65

38.56

35.57

34.68

31.41

26.21

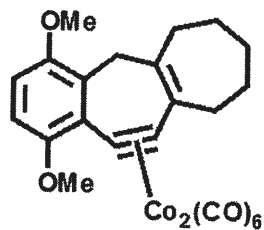

2i

Current Data Parameters  
 NAME Dimethoxy 1,4-CyclohepteneOAc-2 Nicholas  
 EXPHO 1  
 PROCHO 1

F2 - Acquisition Parameters  
 Date 20111110  
 Time 17.43  
 INSTRUM spect  
 PROBH0 5 mm BBO BB-1H  
 PULPROG zgpg30  
 TD 16384  
 SOLVENT CDCl3  
 NS 2277  
 DS 4  
 SWH 17585.611 Hz  
 FIDRES 1.157755 Hz  
 AQ 0.4555252 Sec  
 RG 9195.2  
 LW 27.800 usec  
 DE 6.00 usec  
 TE 300.0 K  
 D1 1.00000000 sec  
 d11 0.00000000 sec  
 CELTA 0.00000000 sec  
 TDO 1

===== CHANNEL f1 =====  
 NUC1 13C  
 P1 15.00 usec  
 PL1 0.00 dB  
 SFO1 75.5004424 MHz

===== CHANNEL f2 =====  
 CPDPRG2 waltz16  
 NUC2 1H  
 PCPD2 10.00 usec  
 PL2 0.00 dB  
 PL12 19.31 dB  
 PL13 19.31 dB  
 SFO2 300.2320000 MHz

F2 - Processing parameters  
 SI 16384  
 SF 75.5004424 MHz  
 WDW EM  
 SSB 0  
 LB 1.00 Hz  
 GB 0  
 PC 1.40

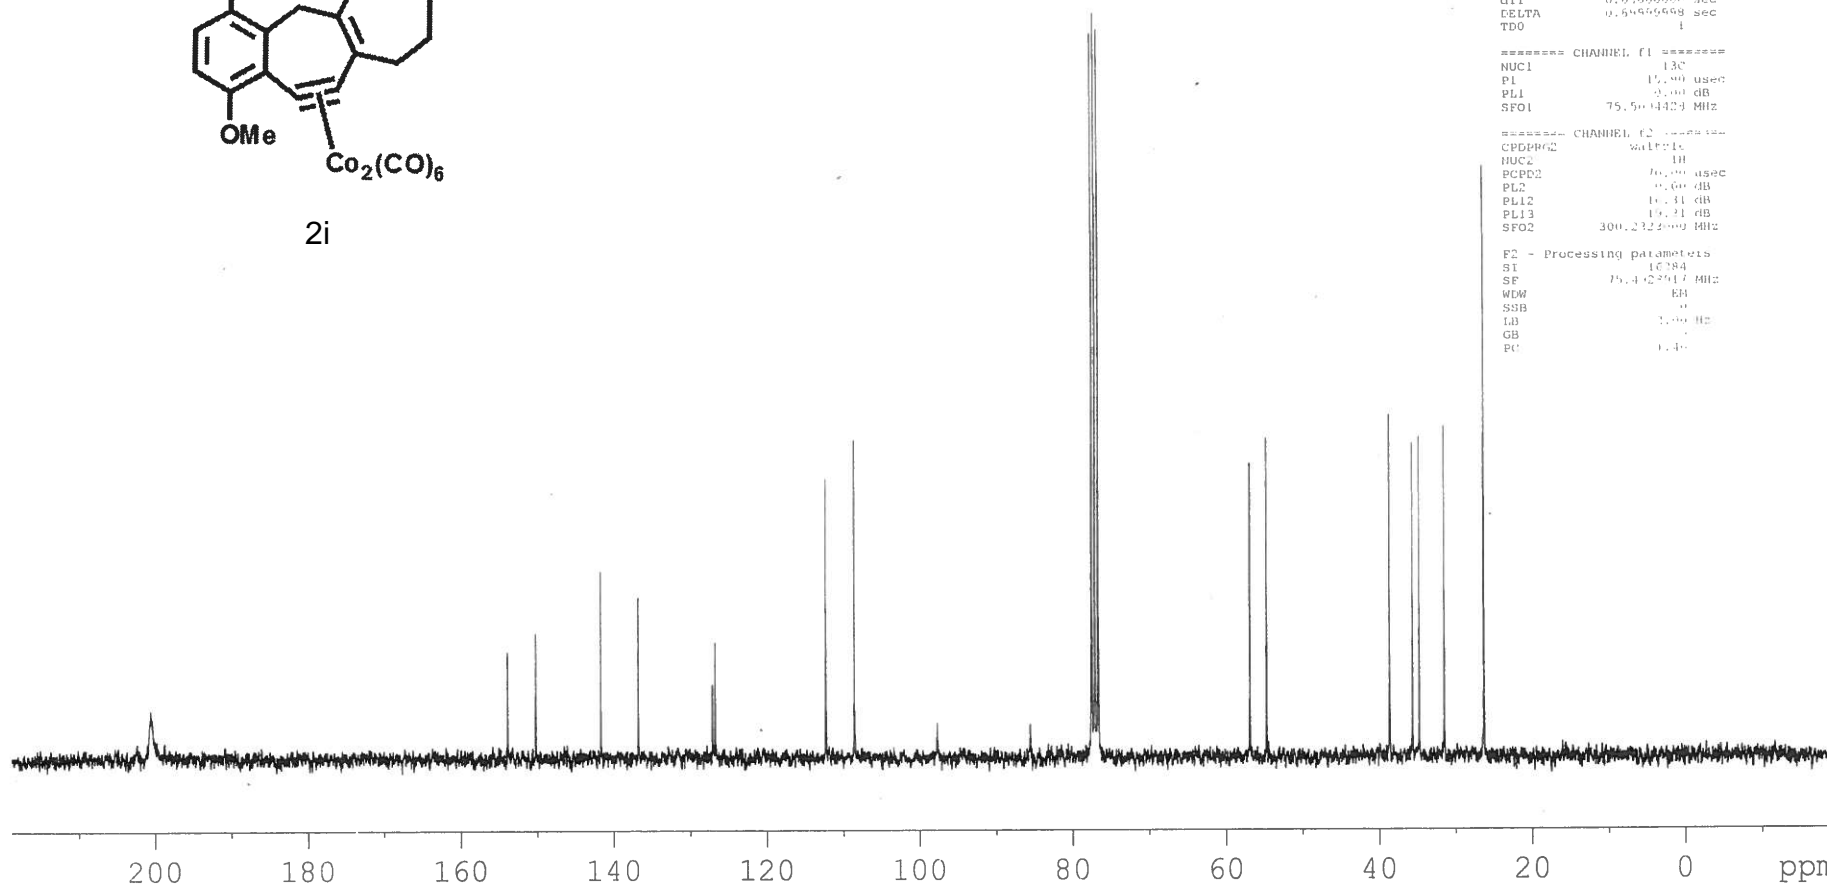

Trimethoxy-4-CC-CyclopenteneOAc Co<sub>2</sub>(CO)<sub>6</sub>  
 Topspin 500 Experiment 4 V3.2  
 Thursday 04 July 2013

Current Data Parameters  
 NAME Trimethoxy-4-CC-CyclopenteneOAc Co<sub>2</sub>(CO)<sub>6</sub> Nicholas  
 EXPNO 4  
 PROCNO 1

F2 - Acquisition Parameters

Date\_ 20130704  
 Time 16.57  
 INSTRUM spect  
 PROBHD 5 mm PABBO BB/  
 PULPROG zgpg30  
 TD 32768  
 SOLVENT CDCl<sub>3</sub>  
 NS 16  
 DS 2  
 SWH 11029.412 Hz  
 FIDRES 0.336591 Hz  
 AQ 1.4854827 sec  
 RG 82.19  
 DW 45.333 usec  
 DE 6.50 usec  
 TE 295.4 K  
 D1 1.00000000 sec  
 D12 0.00002000 sec  
 D16 0.00020000 sec  
 TDO 1

===== CHANNEL f1 =====  
 SF01 500.1300000 MHz  
 NUC1 1H  
 P1 14.80 usec  
 P2 29.60 usec  
 P12 2000.00 usec  
 PLW0 0 W  
 PLW1 12.23400021 W  
 SPNAM[1] Squal00.1000  
 SPOAL1 0.500  
 SPOFFS1 0 Hz  
 SPW1 0.00267970 W

===== GRADIENT CHANNEL =====  
 GPNAM[1] SMSQ10.100  
 GPNAM[2] SMSQ10.100  
 GPZ1 31.00 %  
 GPZ2 11.00 %  
 P16 1000.00 usec

F2 - Processing parameters  
 SI 32768  
 SF 500.1300066 MHz  
 WDW no  
 SSB 0  
 LB 0 Hz  
 GB 0  
 PC 1.00

— 7.270

— 6.417

4.054  
 3.886  
 3.845  
 3.406  
 2.728  
 2.713  
 2.697  
 2.559  
 2.544  
 2.528  
 2.083  
 2.067  
 2.052  
 2.036  
 2.021

1364.55  
 1356.90  
 1349.05  
 1279.83  
 1272.33  
 1264.33

1041.82  
 1033.97  
 1026.27  
 1018.41  
 1010.86

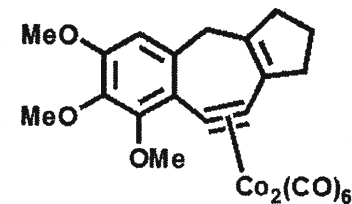

2j

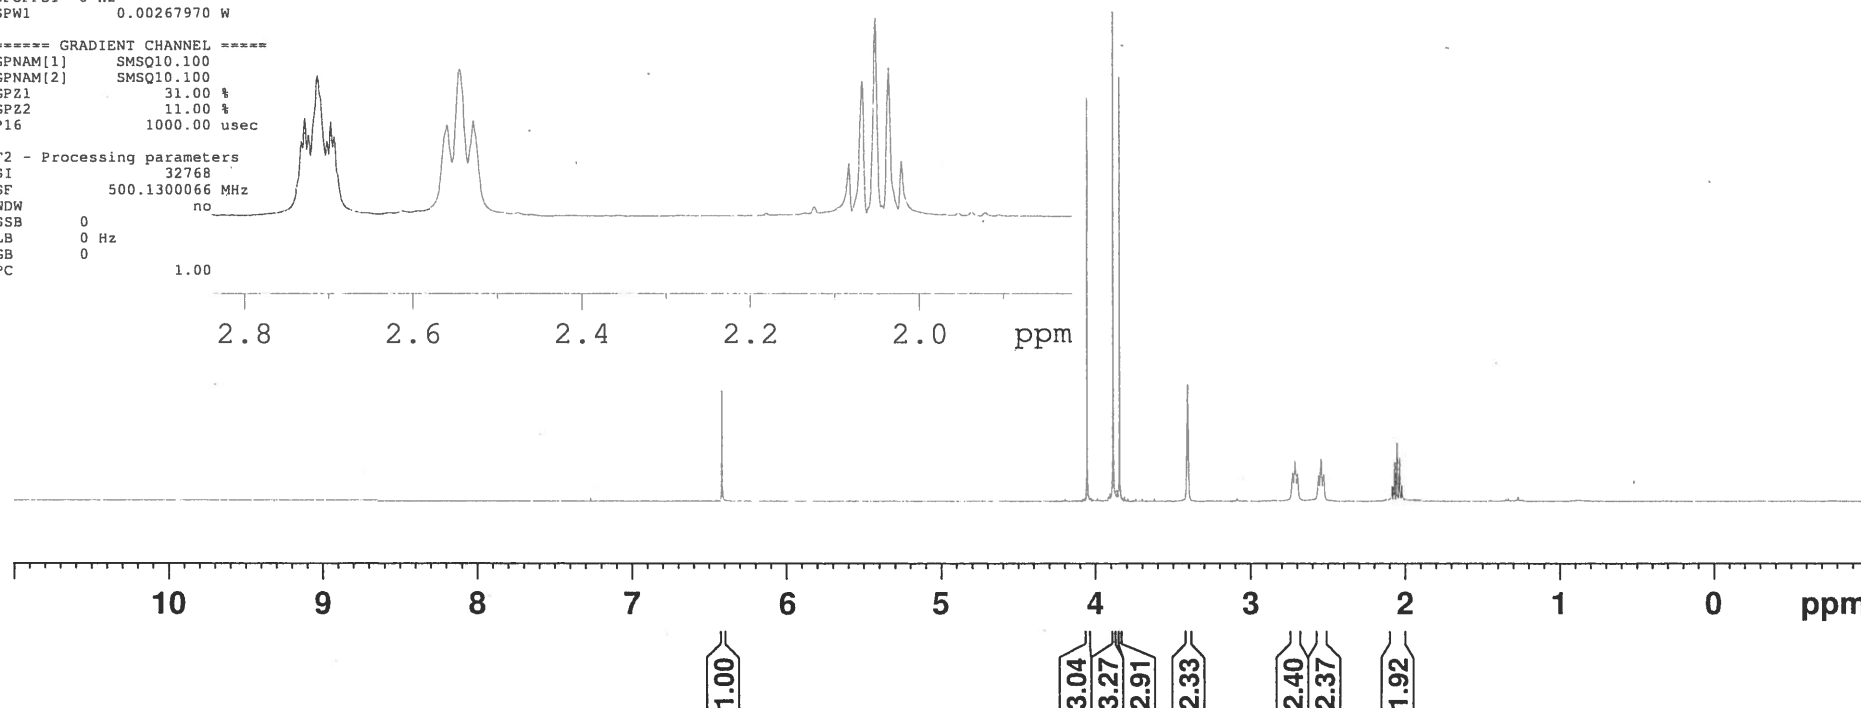

Trimethoxy-4-CC-CyclopenteneOAc Co<sub>2</sub>(CO)<sub>6</sub> Cyclized 13C  
 Experiment 1 Topspin 300  
 Thursday 04 July 2013

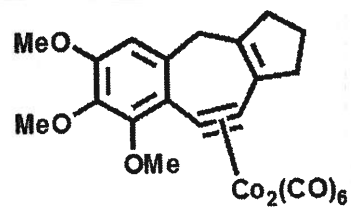

2j

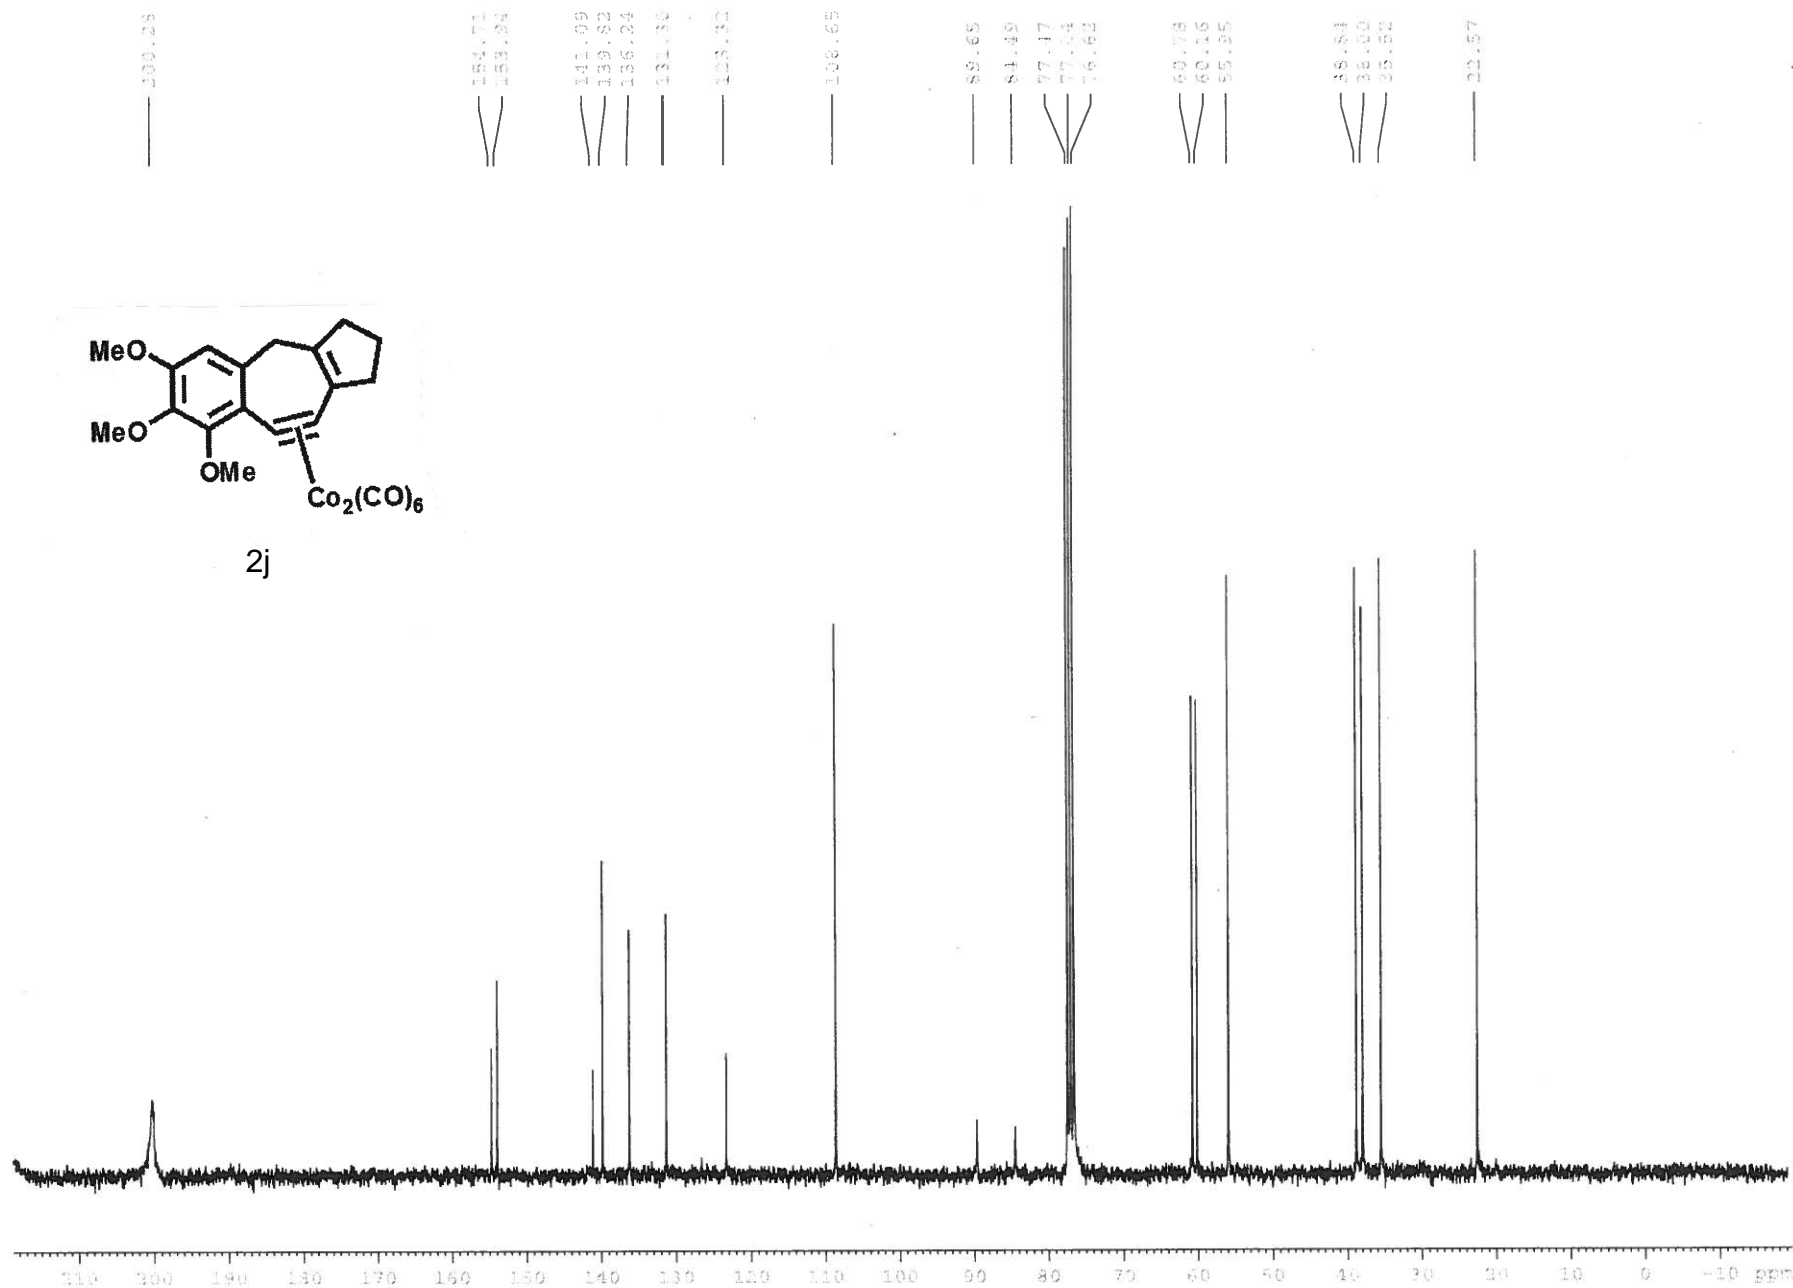



Trimethoxy-4-CC-CyclohexeneOAc Co<sub>2</sub>(CO)<sub>6</sub> Nicholas  
 Experiment 5  
 Topspin 500 V3.2  
 Thursday 11 July 2013

Current Data Parameters  
 NAME Trimethoxy-4-CC-CyclohexeneOAc Co<sub>2</sub>(CO)<sub>6</sub> Nicholas  
 EXPNO 5  
 PROCNO 1

F2 - Acquisition Parameters  
 Date\_ 20130711  
 Time 20.58  
 INSTRUM spect  
 PROBHD 5 mm PABBO BB/  
 PULPROG zgpg30  
 TD 32768  
 SOLVENT CDCl<sub>3</sub>  
 NS 16  
 DS 2  
 SWH 11029.412 Hz  
 FIDRES 0.336591 Hz  
 AQ 1.4854827 sec  
 RG 70.71  
 DW 45.333 usec  
 DE 6.50 usec  
 TE 294.2 K  
 D1 1.00000000 sec  
 D12 0.00002000 sec  
 D16 0.00020000 sec  
 TDO 1

===== CHANNEL f1 =====  
 SFO1 500.1306002 MHz  
 NUC1 1H  
 P1 14.80 usec  
 P2 29.60 usec  
 P12 2000.00 usec  
 PLW0 0 W  
 PLW1 12.23400021 W  
 SPNAM[1] Squa100.1000  
 SPOAL1 0.500  
 SPOFFS1 0 Hz  
 SPW1 0.00267970 W

===== GRADIENT CHANNEL =====  
 GPNAM[1] SMSQ10.100  
 GPNAM[2] SMSQ10.100  
 GPZ1 31.00 %  
 GPZ2 11.00 %  
 P16 1000.00 usec

F2 - Processing parameters  
 SI 32768  
 SF 500.1300066 MHz  
 WDW EM  
 SSB 0  
 LB -0.80 Hz  
 GB 0  
 PC 1.00

— 7.269  
 — 6.478

4.045  
 3.900  
 3.852  
 3.177  
 2.347  
 2.334  
 2.289  
 2.277  
 1.783  
 1.770  
 1.759  
 1.751  
 1.748  
 1.739  
 1.735  
 1.710  
 1.702  
 1.691  
 1.680  
 1.668

1173.61  
 1167.30  
 1144.75  
 1138.60

891.48  
 885.23  
 879.93  
 875.48  
 874.13  
 869.93  
 867.53  
 855.12  
 851.17  
 845.67

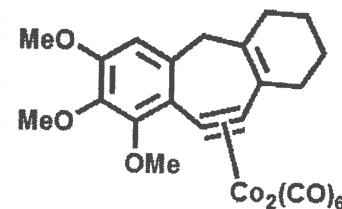

2k

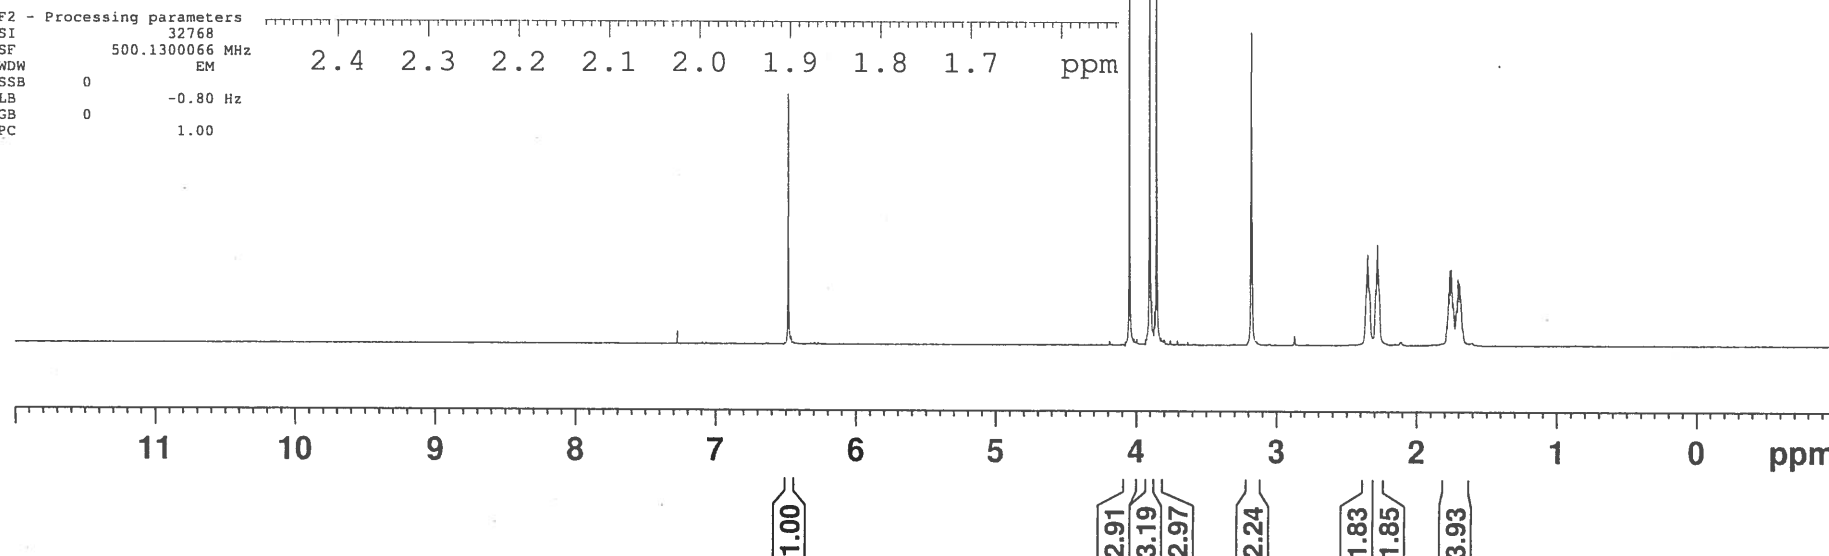

Trimethoxy-4-CC-CyclohexeneOAc Co<sub>2</sub>(CO)<sub>6</sub> Cyclized 13C  
 Experiment 1 Topspin 300  
 Monday 08 July 2013

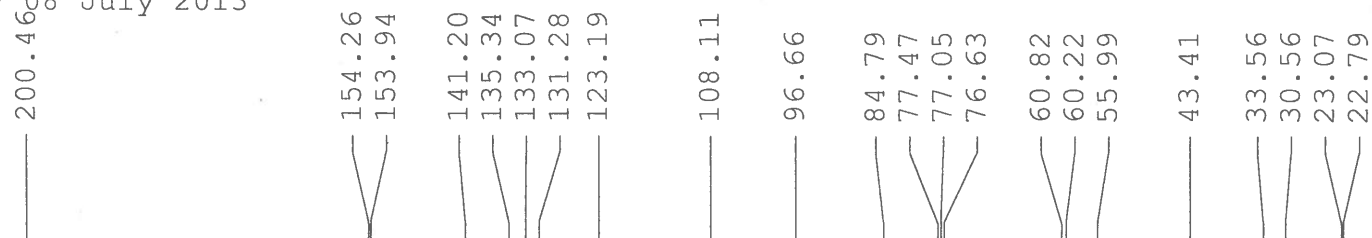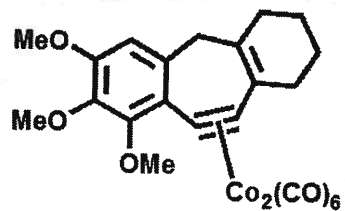

2k

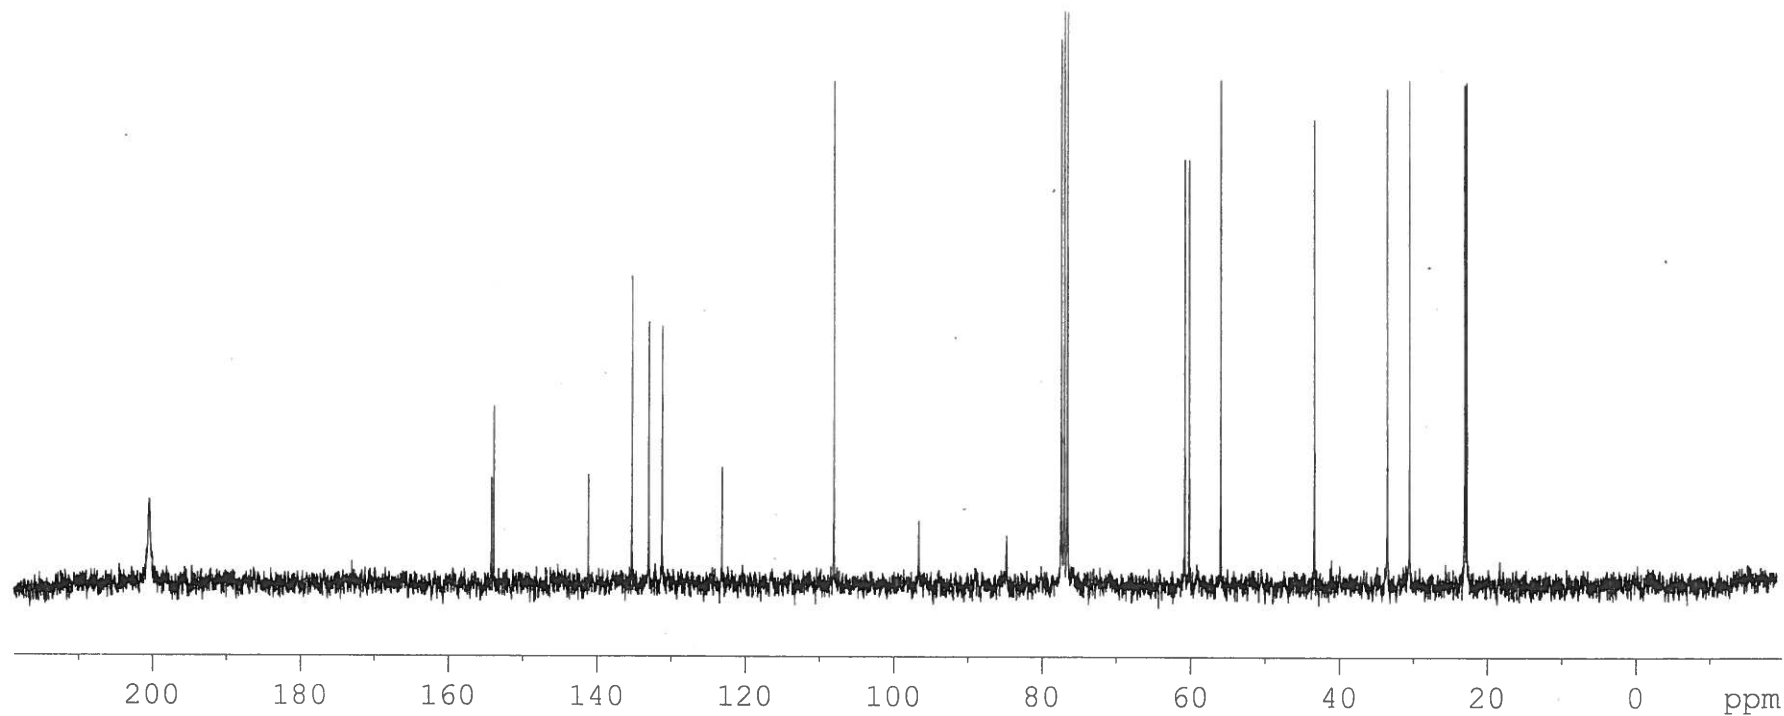

Trimethoxy-4-CC-CyclohexeneMeOAc Co<sub>2</sub>(CO)<sub>6</sub> Nicholas  
Experiment 2 Topspin 500 V3.2

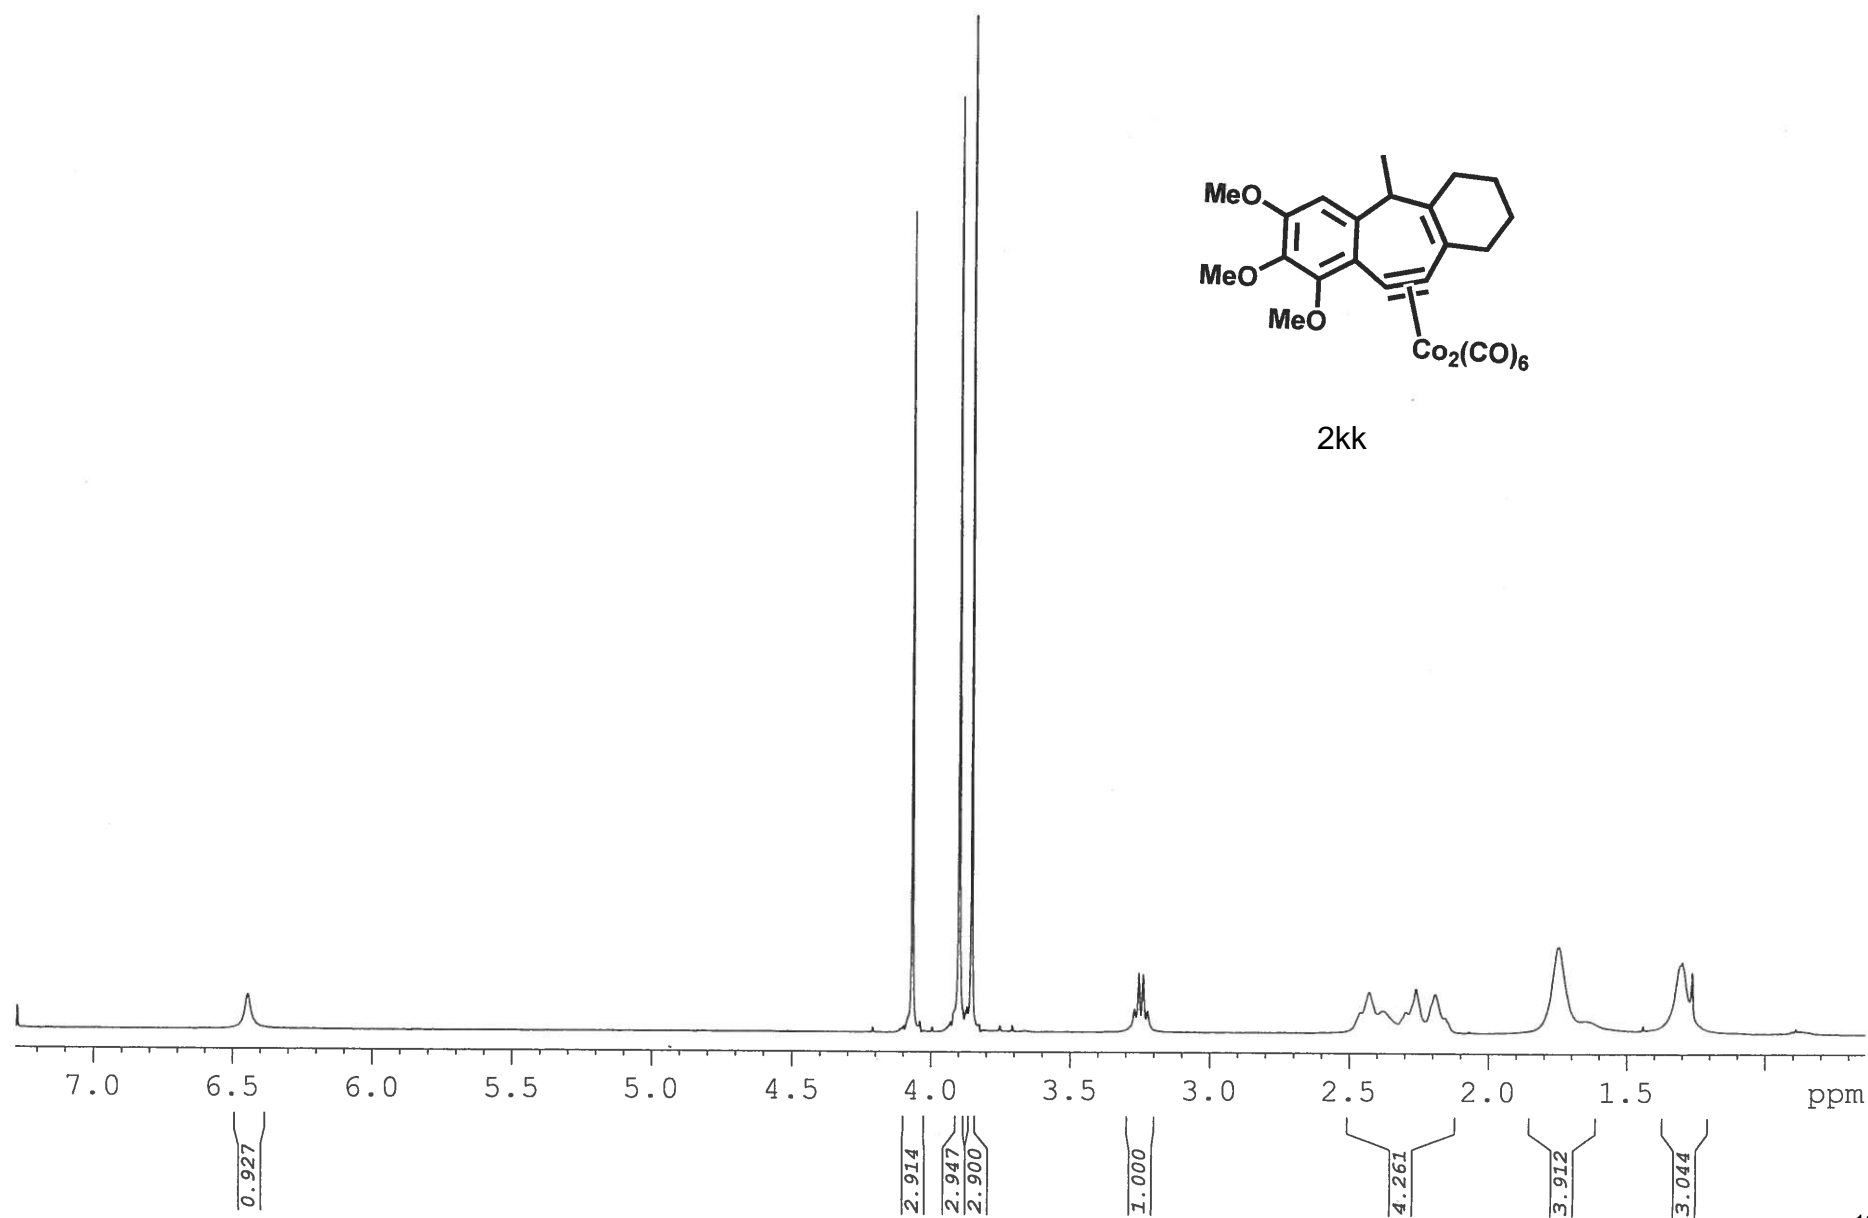

carbon  
 standard 1D 13C experiment  
 DPX300

200.35  
 154.51  
 154.31  
 140.68  
 139.07  
 137.67  
 129.33  
 121.90  
 106.52  
 95.32  
 83.83  
 77.46  
 77.04  
 76.62  
 60.82  
 60.11  
 55.95  
 47.45  
 31.03  
 23.21  
 22.81  
 19.51

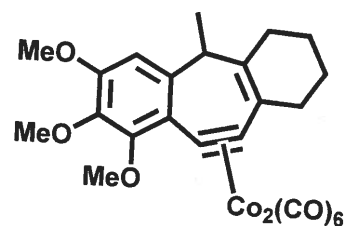

2kk

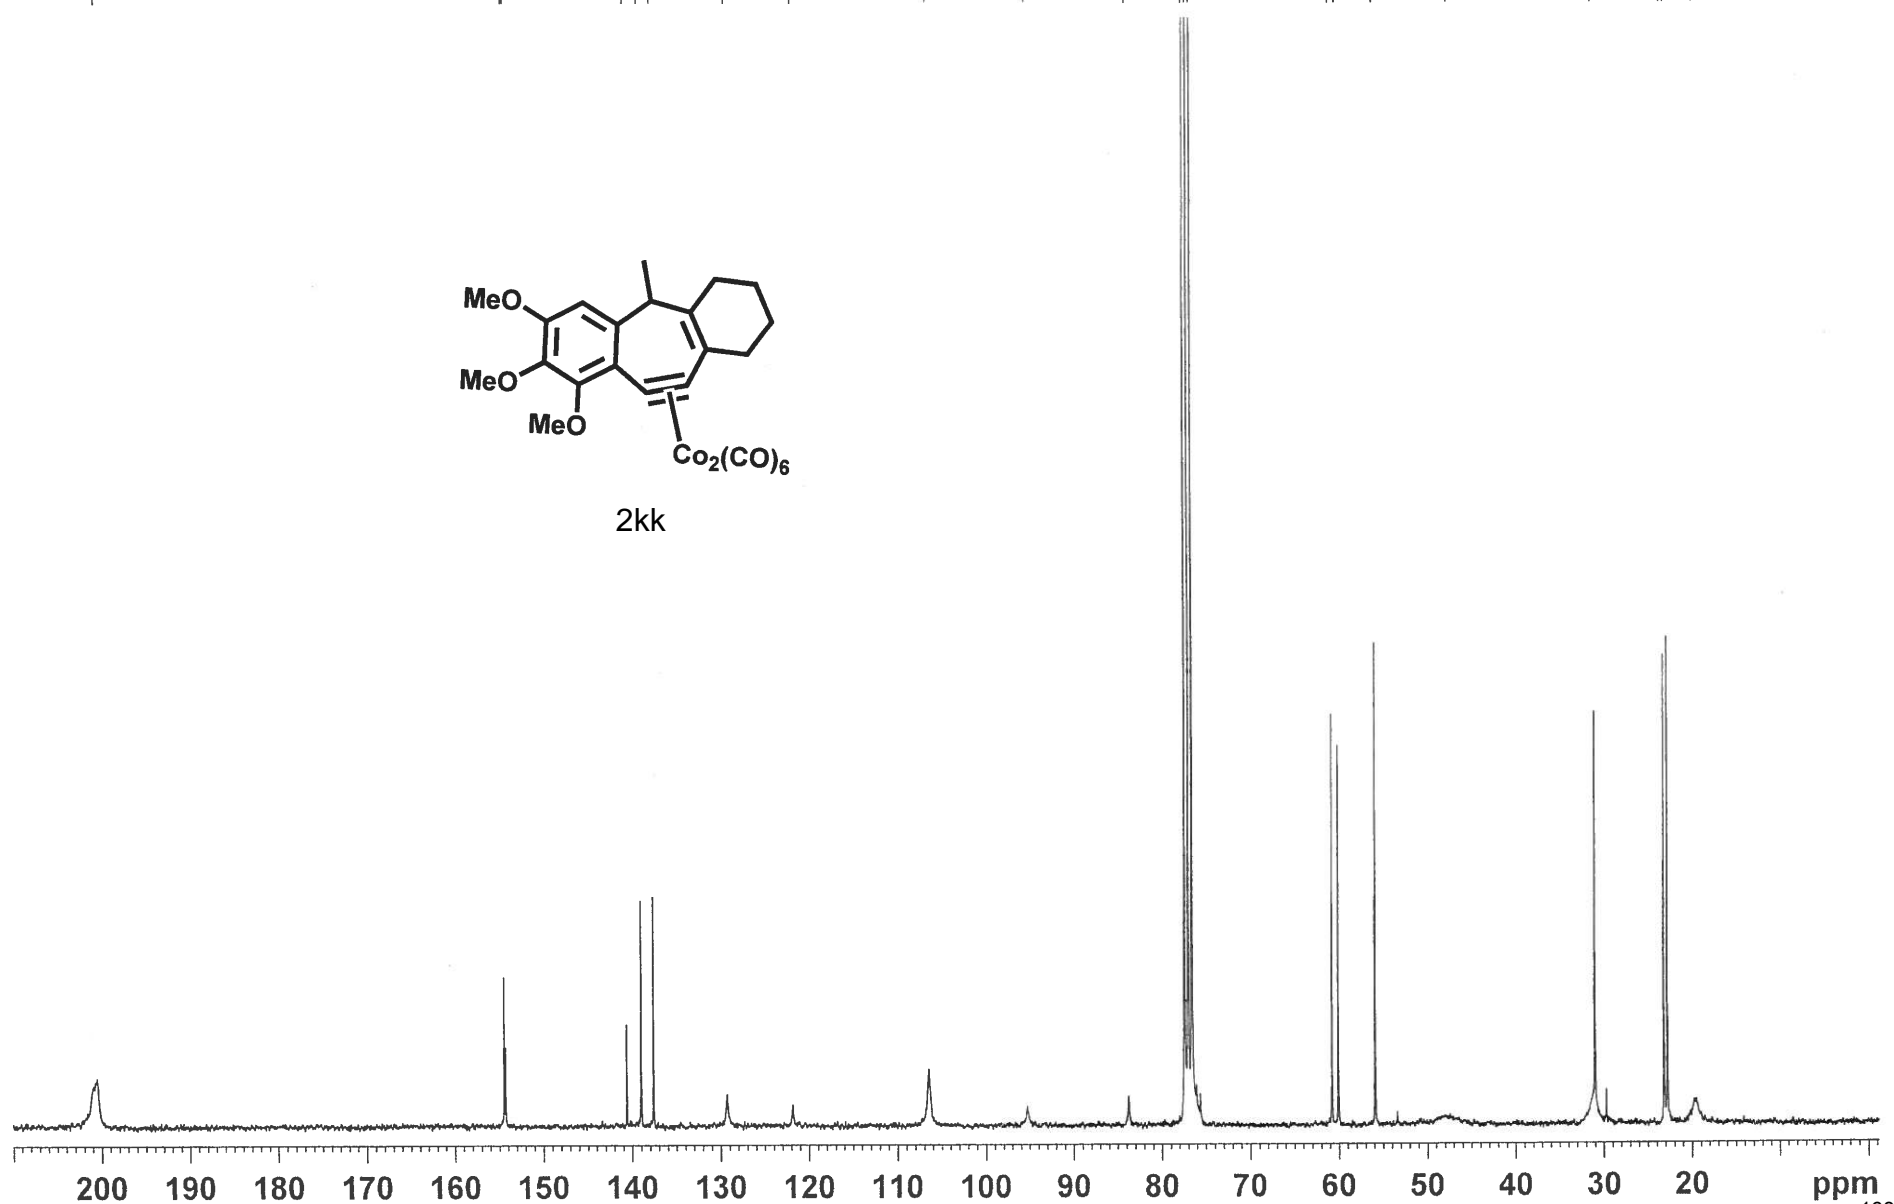

Trimethoxy-5-CC-Cyclopentene Co<sub>2</sub>(CO)<sub>6</sub> Cyclized  
 Experiment 4 Topspin 500  
 Wednesday 26 October 2011

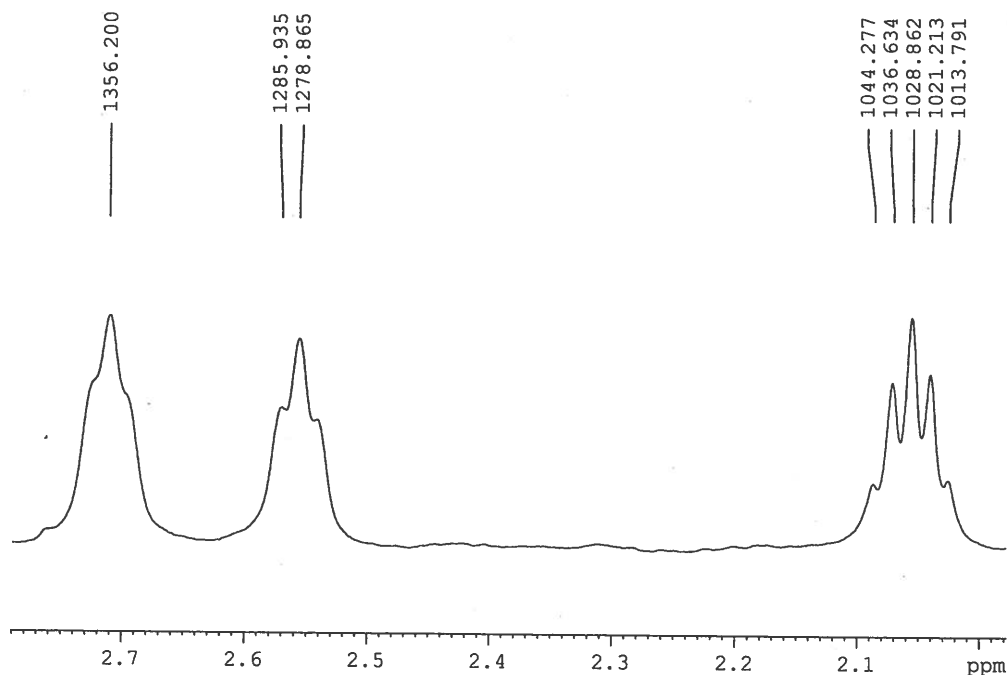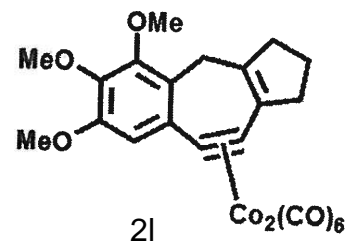

3.915  
 3.887  
 3.845  
 3.478  
 2.712  
 2.571  
 2.557  
 2.088  
 2.073  
 2.057  
 2.042  
 2.027

Current Data Parameters  
 NAME Trimethoxy-5-CC-Cyclopentene Co<sub>2</sub>(CO)<sub>6</sub> Cyclized  
 EXPNO 4  
 PROCNO 1

F2 - Acquisition Parameters  
 Date 2011026  
 Time 13.03  
 INSTRUM spect  
 PROBHD 5 mm Multinucl  
 PULPROG zgpg30  
 TD 32768  
 SOLVENT C6D6  
 NS 8  
 DS 2  
 SWH 10964.912 Hz  
 FIDRES 0.334623 Hz  
 AQ 1.4943165 sec  
 RG 287.4  
 DW 45.600 usec  
 DE 6.50 usec  
 TE 297.2 K  
 D1 2.0000000 sec  
 d12 0.0002000 sec  
 D16 0.0002000 sec  
 TD0 1

===== CHANNEL f1 =====  
 NUC1 1H  
 P1 14.80 usec  
 P2 29.60 usec  
 PL1 2000.00 usec  
 PL0 120.00 dB  
 PL1 -1.40 dB  
 SFO1 500.1306002 MHz  
 SP1 35.19 dB  
 SPNAM1 Squal100.1000  
 SFOALL 0.500  
 SPOFFS1 0.00 Hz

===== GRADIENT CHANNEL =====  
 GPNAM1 SINE.100  
 GPNAM2 SINE.100  
 GPZ1 31.00 %  
 GPZ2 11.00 %  
 P16 1000.00 usec

F2 - Processing parameters  
 SI 32768  
 SF 500.1300197 MHz  
 WDW EM  
 SSB 0  
 LB 0.25 Hz  
 GB 0  
 PC 1.00

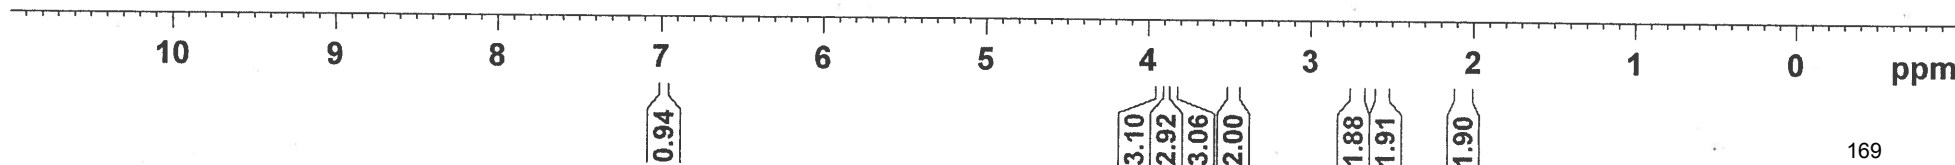

imethoxy-5-CC-CyclopenteneOAc Co<sub>2</sub>(CO)<sub>6</sub> Cyclized 13C  
 periment 3 Ultra 300 Topspin  
 ursday 27 October 2011

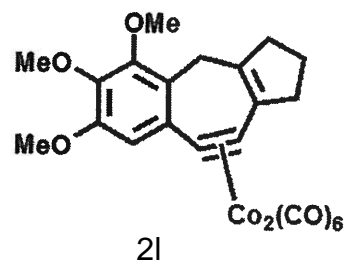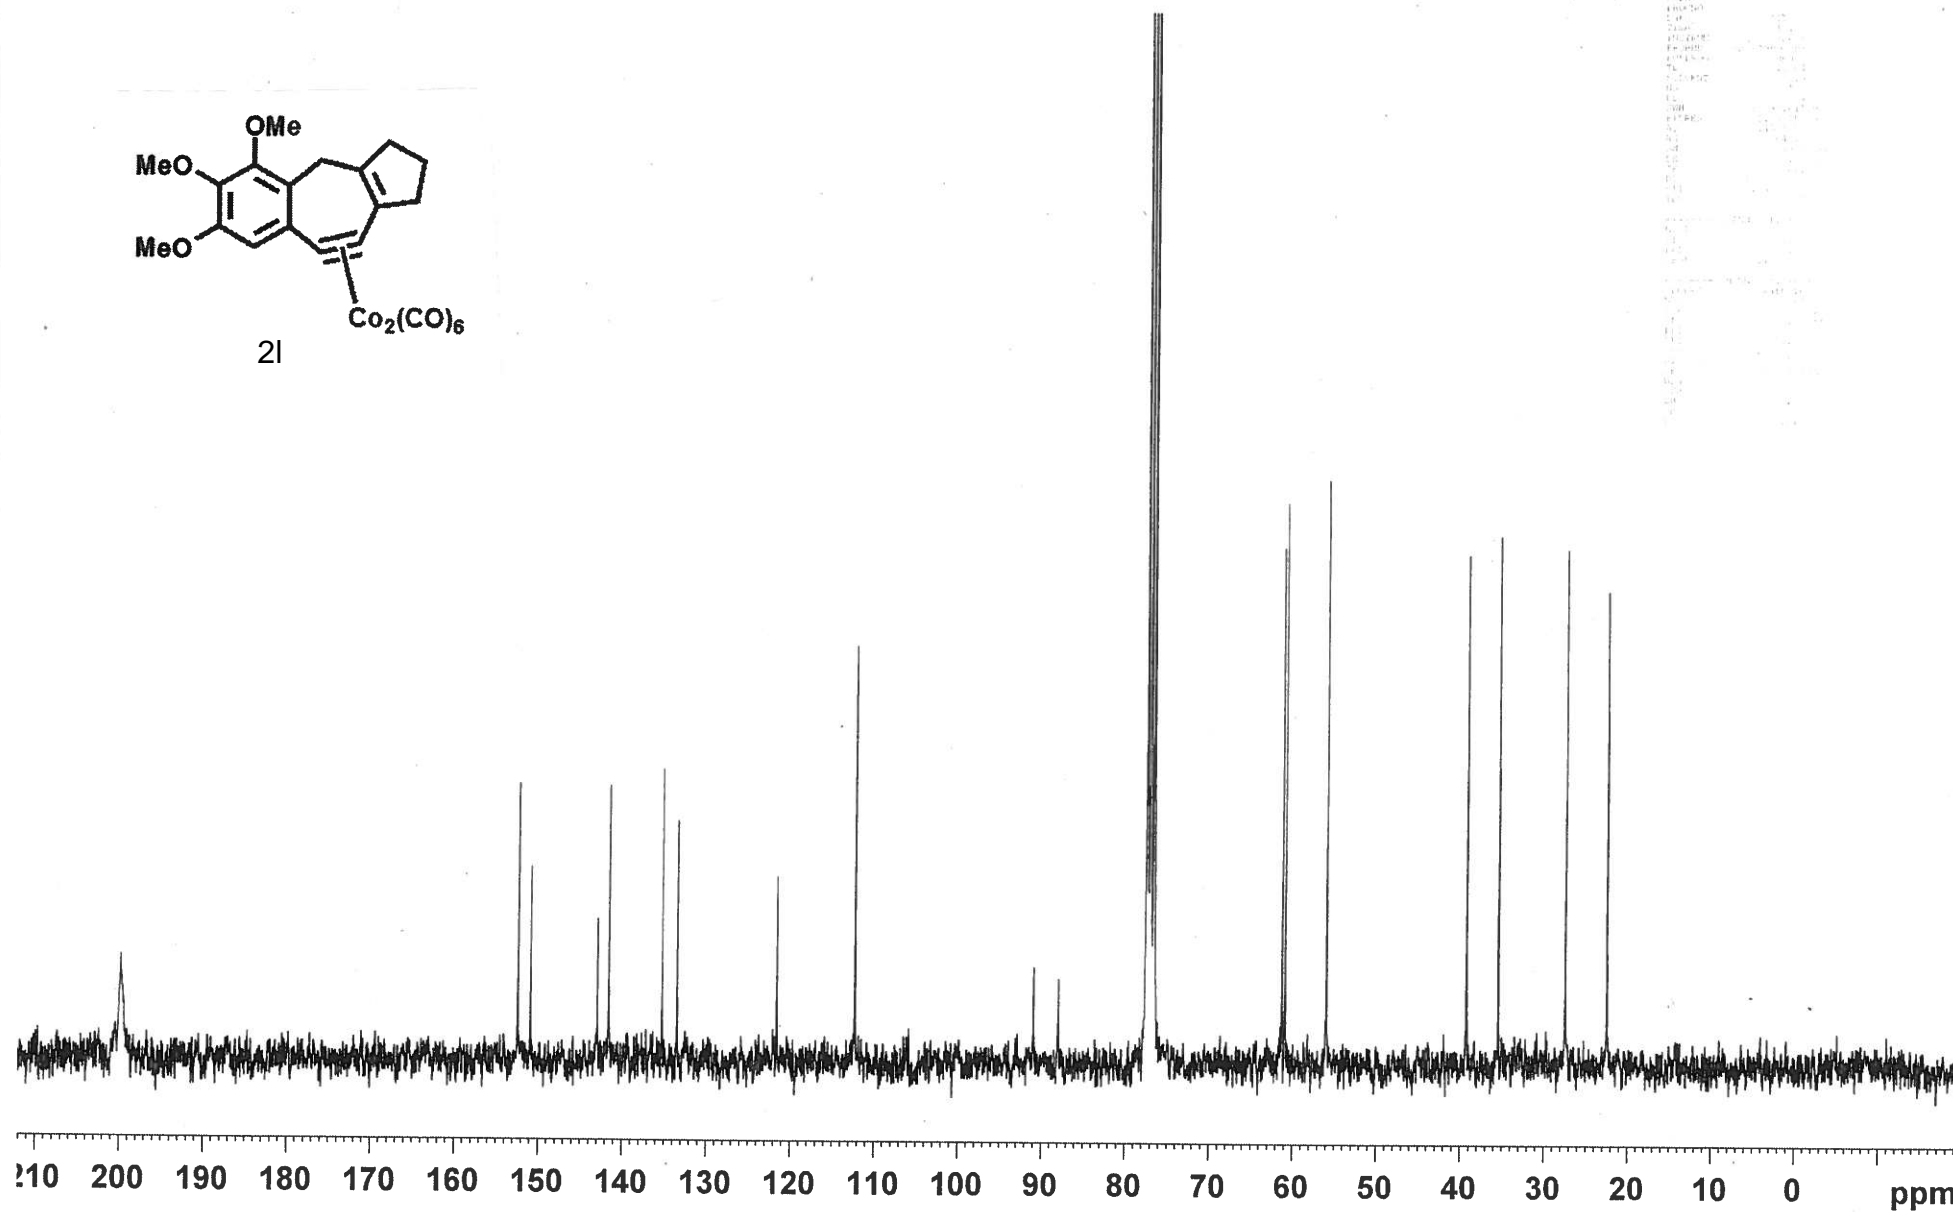

Trimethoxy-5-CC-CyclohexeneOAc Cyclized  
 Experiment 4 Topspin 500  
 Wednesday 12 October 2011

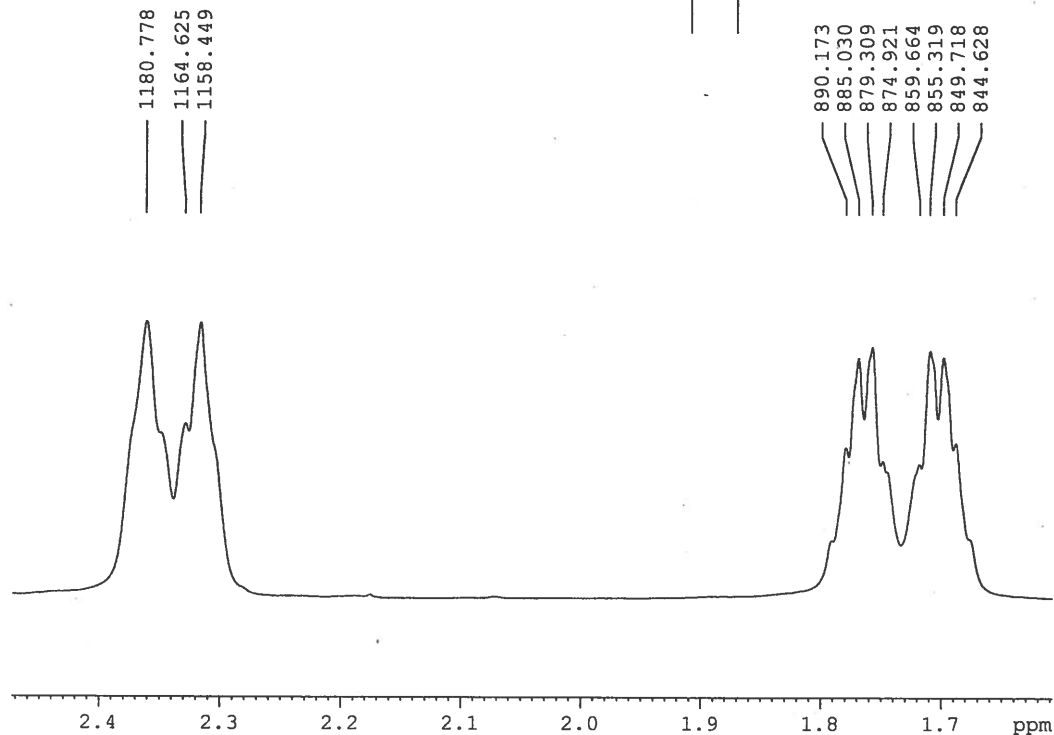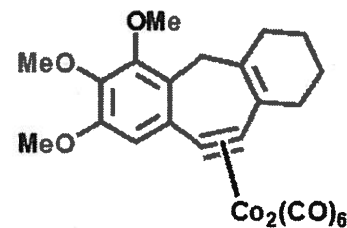

2m

Current Data Parameters  
 NAME Trimethoxy-5-CC-CyclohexeneOAc Cyclized  
 EXPNO 4  
 PROCNO 1

F2 - Acquisition Parameters  
 Date\_ 20111012  
 Time\_ 13.04  
 INSTRUM spect  
 PROBHD 5 mm PABBO BB/  
 PULPROG zgpg30  
 TD 32768  
 SOLVENT C6D6  
 NS 8  
 DS 2  
 SWH 10964.912 Hz  
 FIDRES 0.334623 Hz  
 AQ 1.4943165 sec  
 RG 35.9  
 DW 45.600 usec  
 DE 6.50 usec  
 TE 296.2 K  
 D1 2.00000000 sec  
 d12 0.00002000 sec  
 D16 0.00020000 sec  
 TDO 1

===== CHANNEL f1 =====  
 NUC1 1H  
 P1 14.80 usec  
 P2 29.60 usec  
 P12 2000.00 usec  
 PL0 120.00 dB  
 PL1 -1.40 dB  
 SFO1 500.1300000 MHz  
 SP1 35.19 dB  
 SPNAM1 Squal100.1000  
 SPOAL1 0.500  
 SPOFFS1 0.00 Hz

===== GRADIENT CHANNEL =====  
 GPNAM1 SINE.100  
 GPNAM2 SINE.100  
 GPZ1 31.00 %  
 GPZ2 11.00 %  
 P16 1000.00 usec

F2 - Processing parameters  
 SI 32768  
 SF 500.1300188 MHz  
 WDW EM  
 SSB 0  
 LB 1.00 Hz  
 GB 0  
 PC 1.00

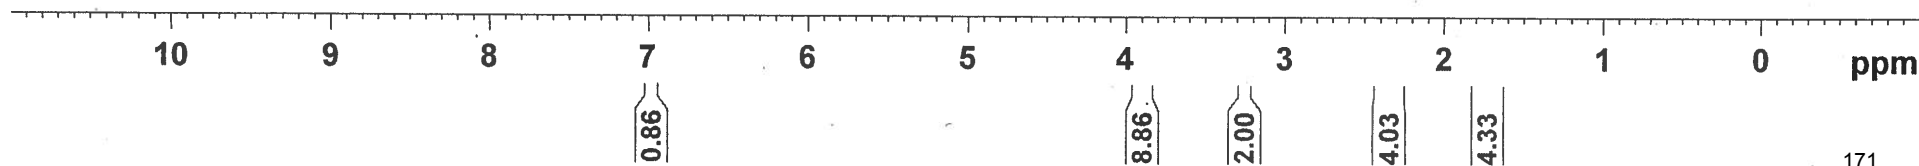

dimethoxy-5-CC-CyclohexeneOAc Nicholas 13C  
Experiment 1 Topspin Ultra 300  
Wednesday 12 October 2011

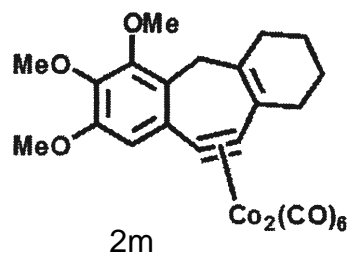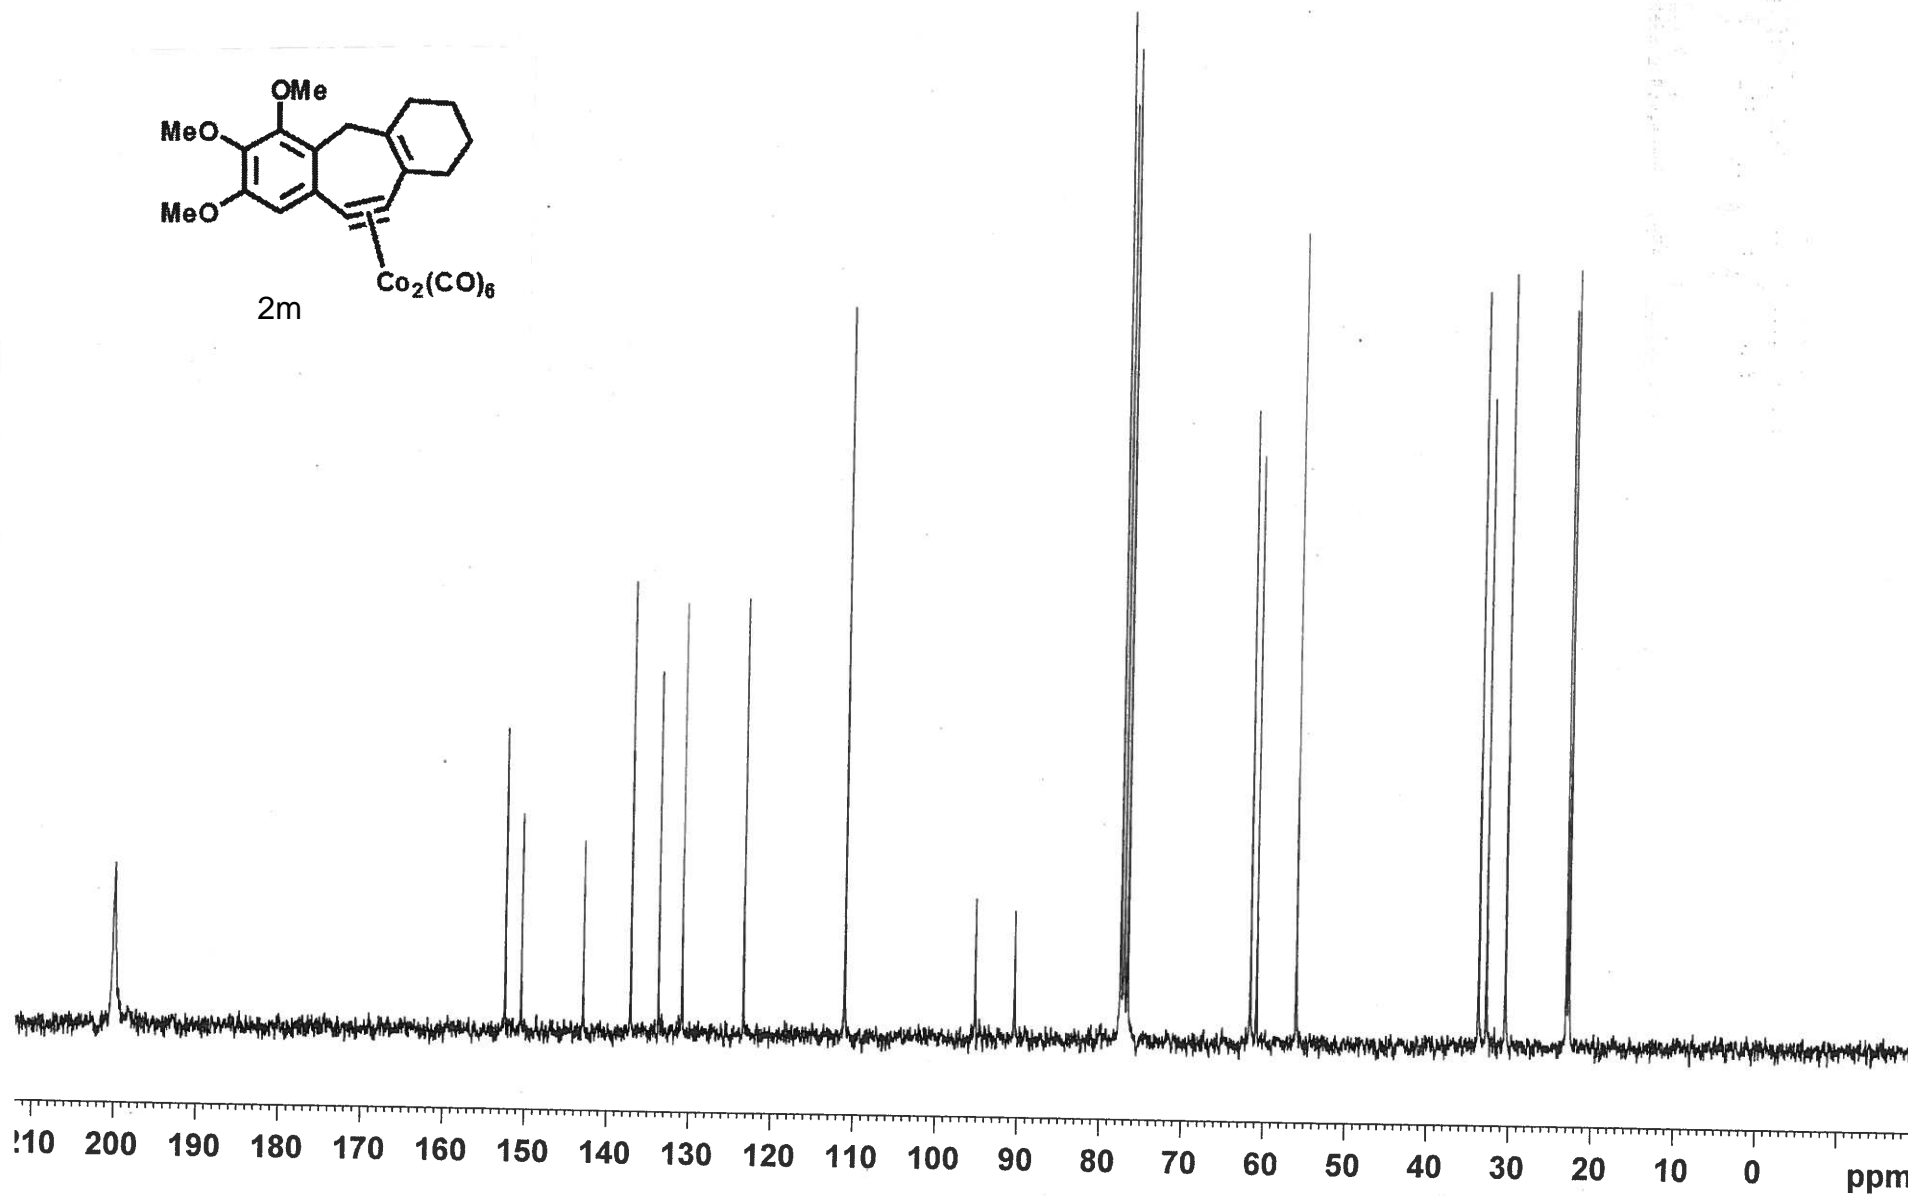



Trimethoxy-5-CC-CyclohexeneOAc-Ph Cyclized  
 Topspin 500 Experiment 6  
 Wednesday 28 September 2011

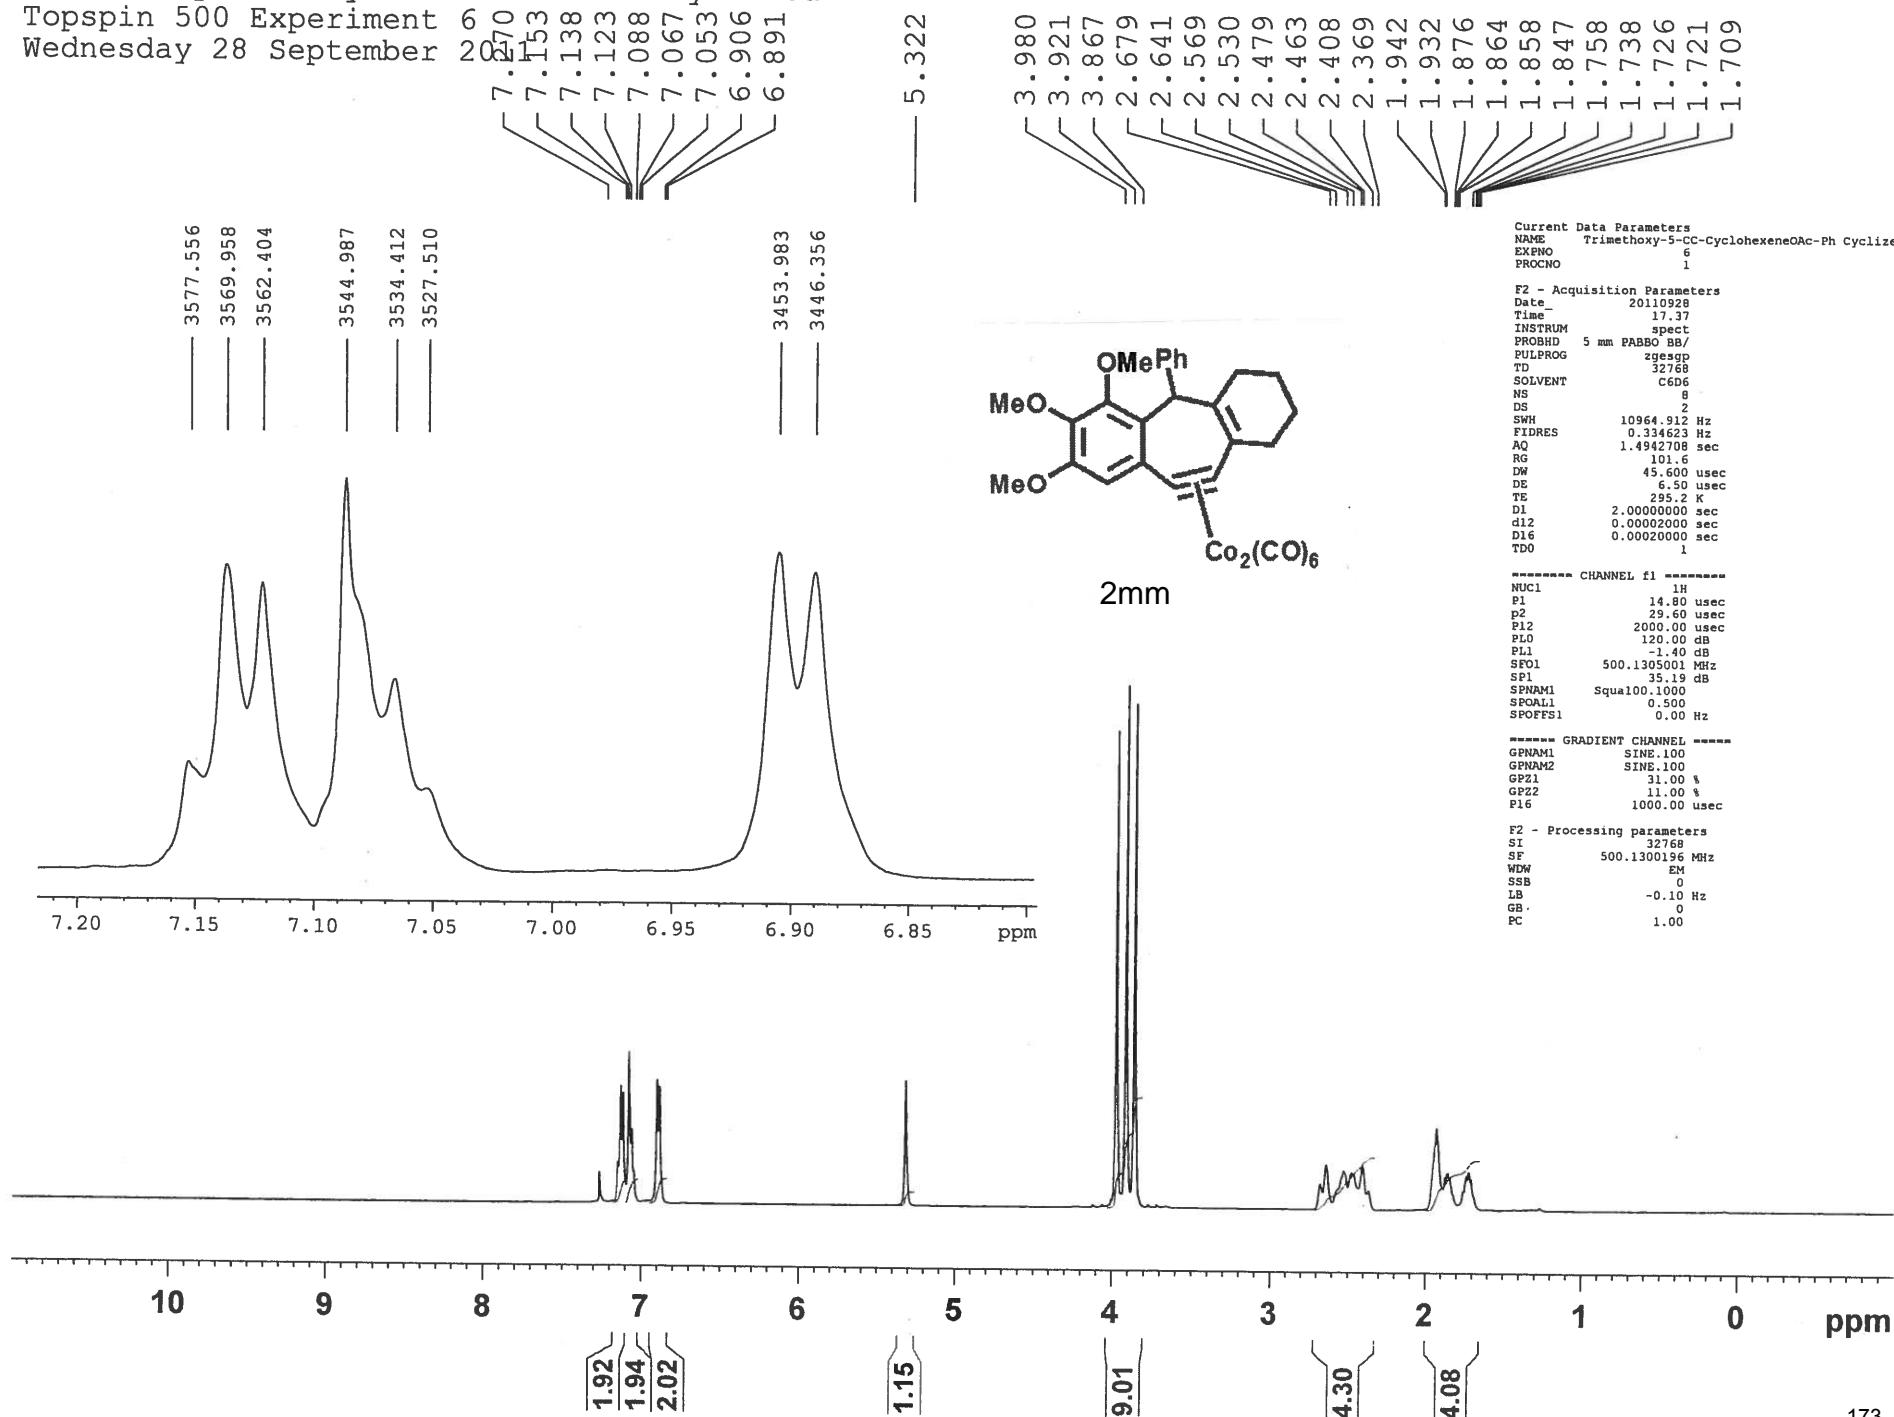

imethoxy-5-CC-CyclohexeneOAc<sup>m</sup> Nicholas 13C  
 periment 3 Topspin Ultra 300  
 ursday 29 September 2011

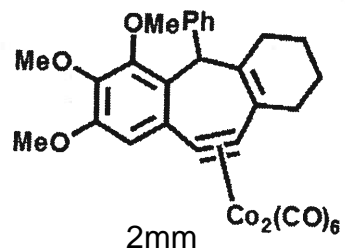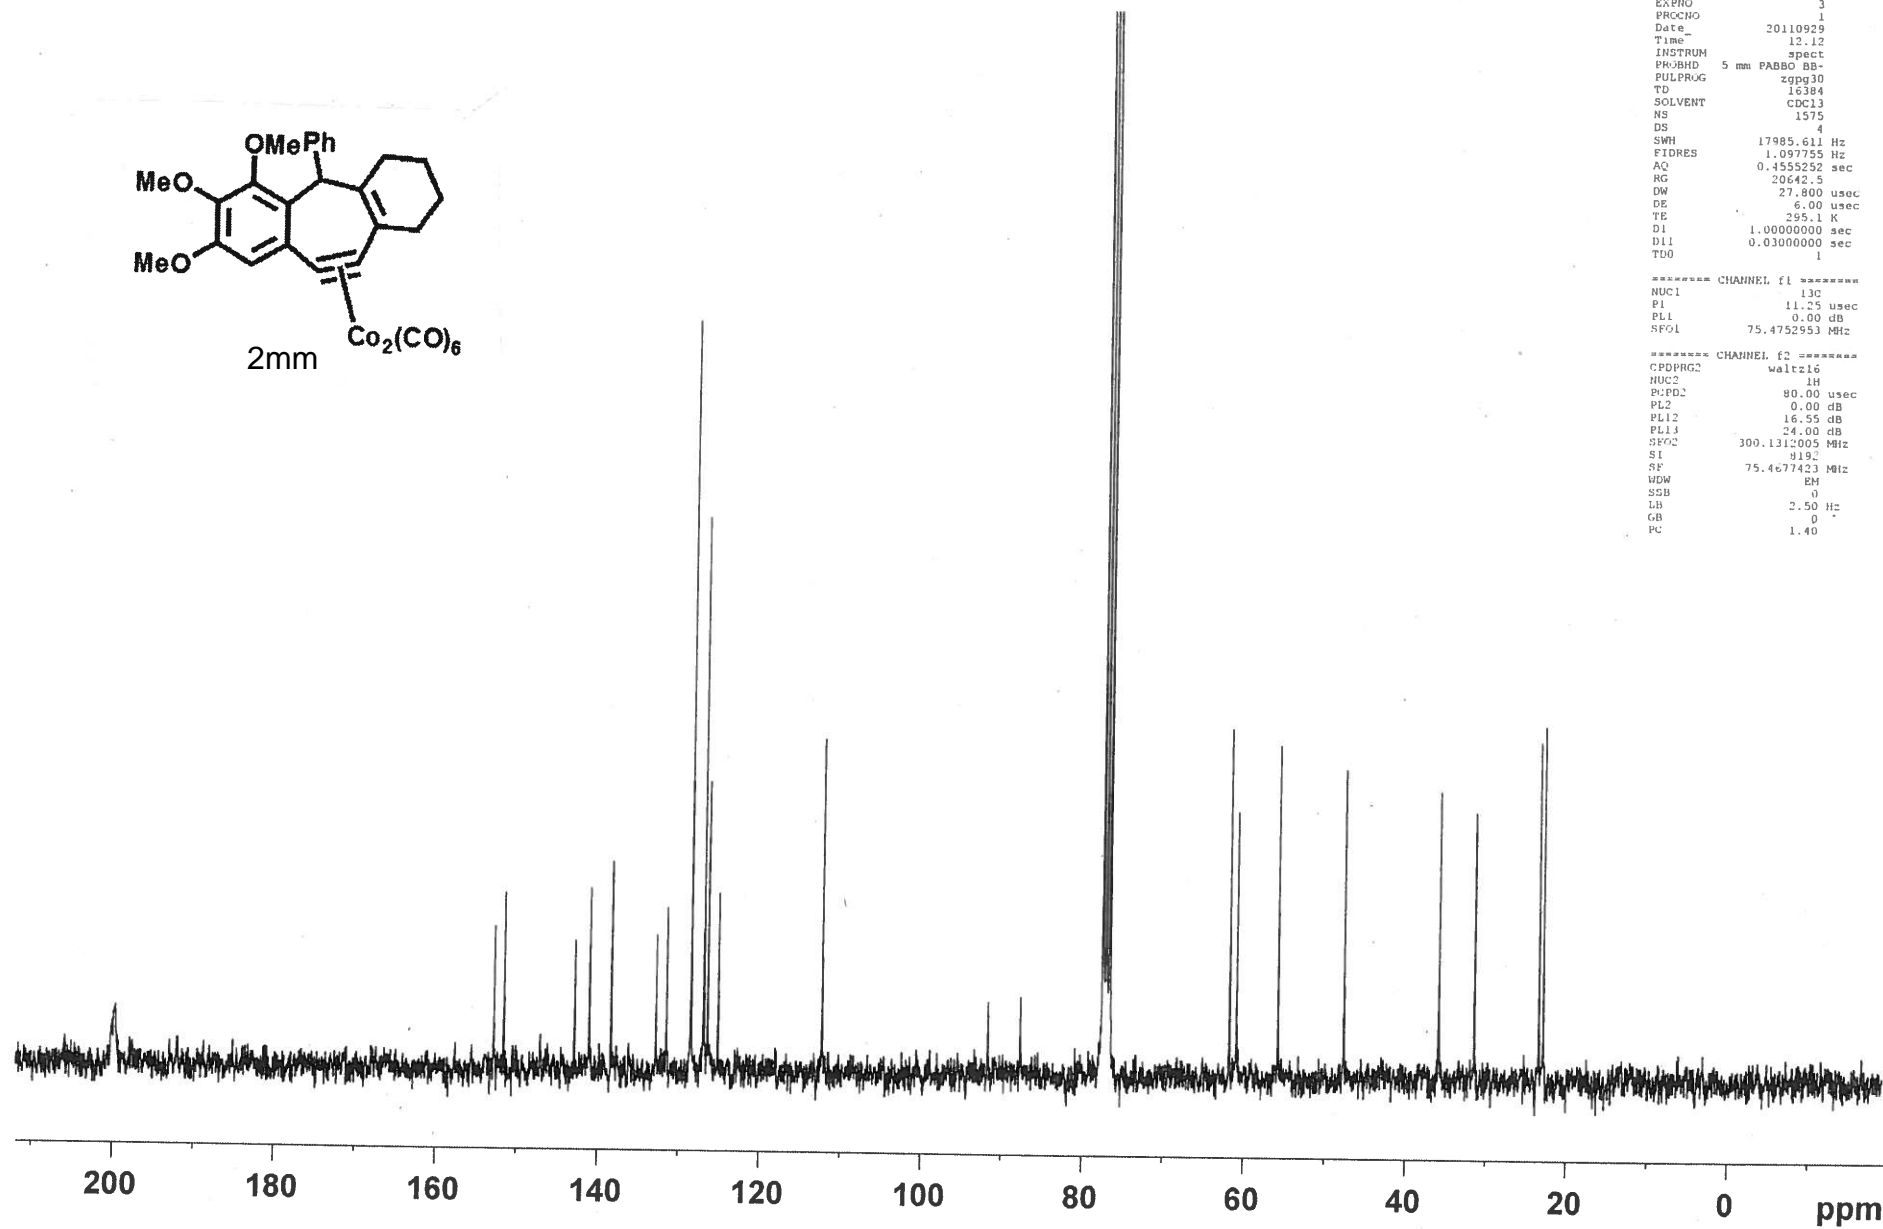

```

NAME      Trimethoxy-5-CC-CyclohexeneOAc Nicholas 13C
EXPNO     3
PROCNO    1
Date_     20110929
Time      12.12
INSTRUM   spect
PROBHD    5 mm PABBO BB-
PULPROG   zgpg30
TD        16384
SOLVENT   CDCl3
NS        1575
DS        4
SWH       17985.611 Hz
FIDRES    1.097755 Hz
AQ        0.4555252 sec
RG        20642.5
DW        27.800 usec
DE        6.00 usec
TE        295.1 K
D1        1.00000000 sec
D11       0.03000000 sec
TD0       1

===== CHANNEL f1 =====
NUC1      13C
P1        11.25 usec
PL1       0.00 dB
RG1       75.4752953 MHz

===== CHANNEL f2 =====
CPDPRG2   waltz16
NUC2      1H
P2        80.00 usec
PL2       0.00 dB
PL12      16.55 dB
PL13      24.00 dB
SFO2      300.1312005 MHz
SI        9192
SF        75.4677423 MHz
WDW       EM
SSB       0
LB        2.50 Hz
GB        0
PC        1.40
  
```

Trimethoxy-5-CC-CyclohexeneOAc-Ph CyclizedElim  
 Experiment 2 Topspin 500  
 Tuesday 06 September 2011

7.271  
7.256  
7.240  
7.177  
7.163  
7.148  
7.035  
7.019  
6.824  
6.675  
6.666  
6.657  
6.488

3.910  
3.811  
2.779  
2.767  
2.754  
2.434  
2.423  
2.412  
2.400  
1.838  
1.825  
1.813  
1.800  
1.787

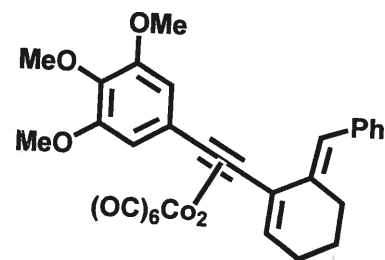

11mm

Current Data Parameters  
 NAME Trimethoxy-5-CC-CyclohexeneOAc-Ph CyclizedElim  
 EXPNO 2  
 PROCNO 1

F2 - Acquisition Parameters  
 Date 20110906  
 Time 14.48  
 INSTRUM spect  
 PROBHD 5 mm PABBO BB/  
 PULPROG zgpg30  
 TD 32768  
 SOLVENT C6D6  
 NS 8  
 DS 2  
 SWH 10964.912 Hz  
 FIDRES 0.334623 Hz  
 AQ 1.4943165 sec  
 RG 45.3  
 DW 45.600 usec  
 DE 6.50 usec  
 TE 294.2 K  
 D1 2.00000000 sec  
 d12 0.00002000 sec  
 D16 0.00020000 sec  
 TDO 1

===== CHANNEL f1 =====  
 NUC1 1H  
 P1 14.80 usec  
 p2 29.60 usec  
 P12 2000.00 usec  
 PLO 120.00 dB  
 PL1 1.40 dB  
 SFO1 500.1305001 MHz  
 SP1 35.19 dB  
 SPNAM1 Squal100.1000  
 SFOAL1 0.500  
 SFOFFS1 0.00 Hz

===== GRADIENT CHANNEL =====  
 GPM1 SINE.100  
 GPM2 SINE.100  
 GP21 31.00 %  
 GP22 11.00 %  
 P16 1000.00 usec

F2 - Processing parameters  
 SI 32768  
 SF 500.1300163 MHz  
 WDW EM  
 SSB 0  
 LB 0.25 Hz  
 GB 0  
 PC 1.00

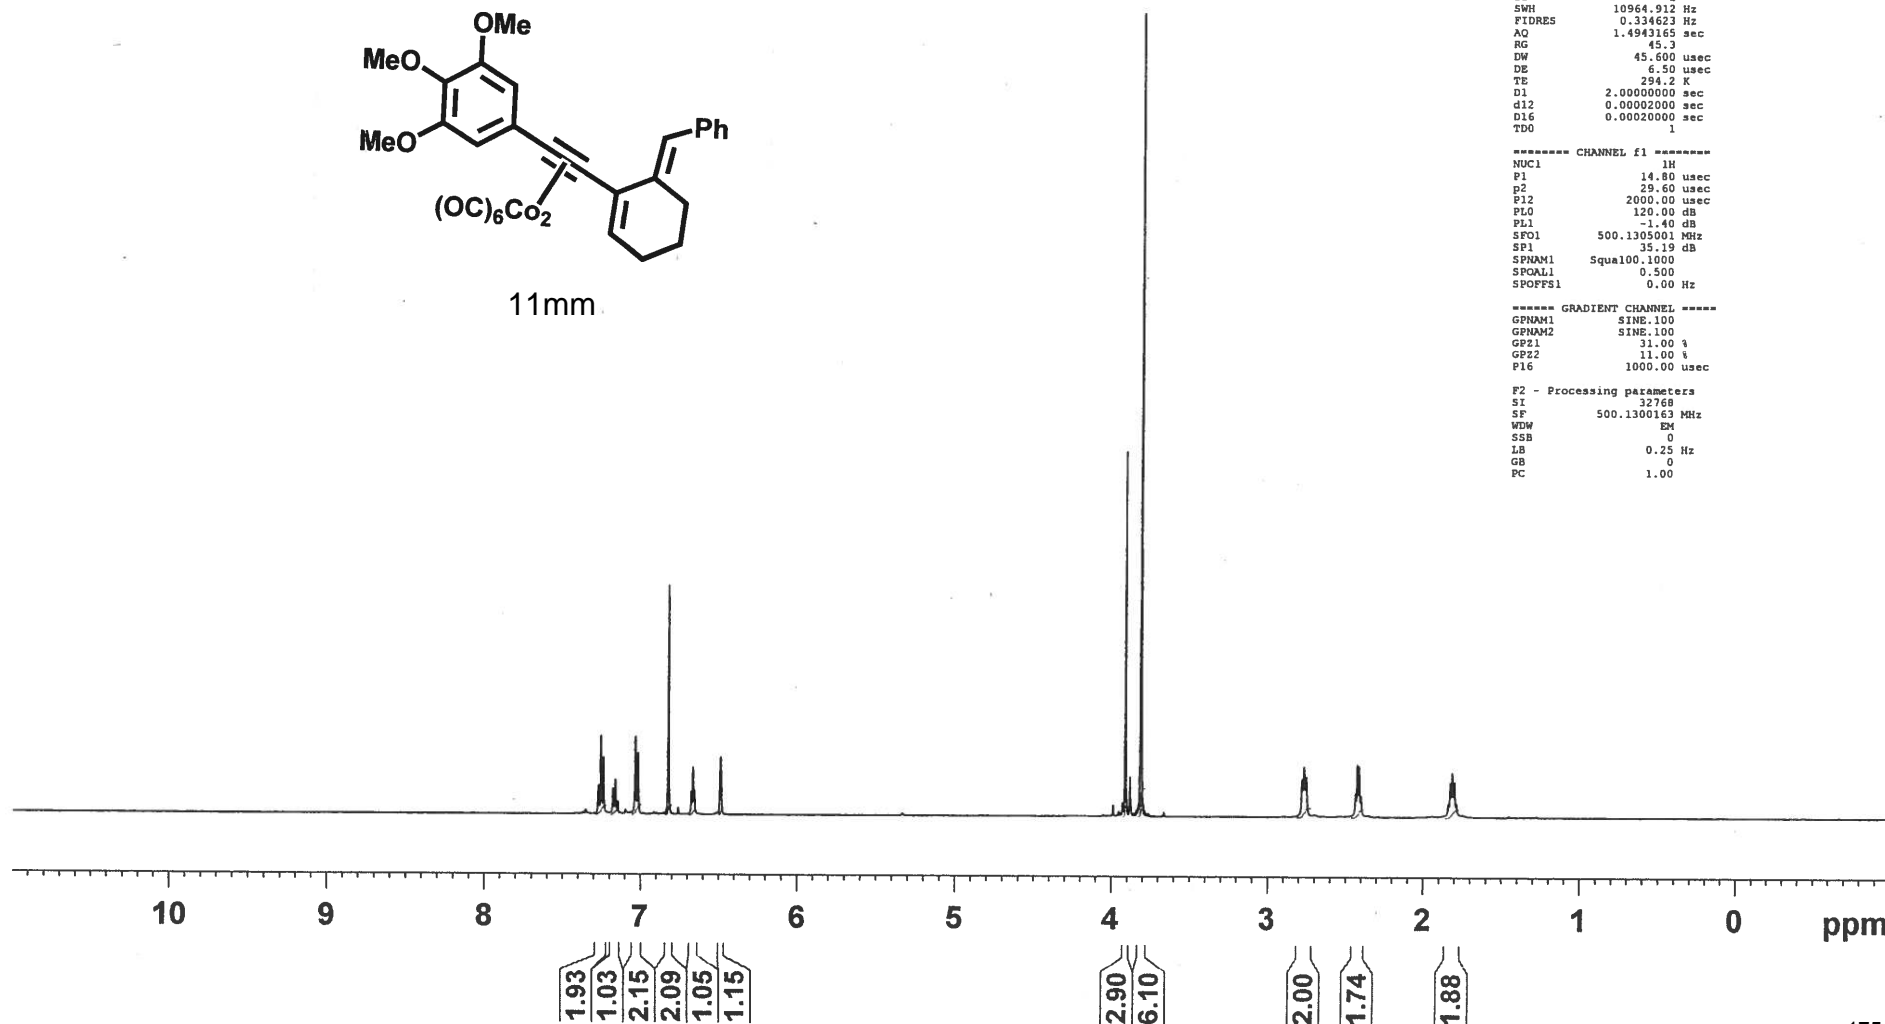

dimethoxy-5-CC-CyclohexeneOAc-Ph CyclizedElim 13C  
Experiment 5 Topspin Ultra 300  
Thursday 08 September 2011

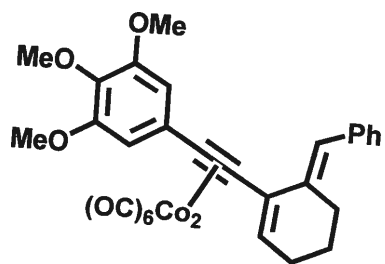

11mm

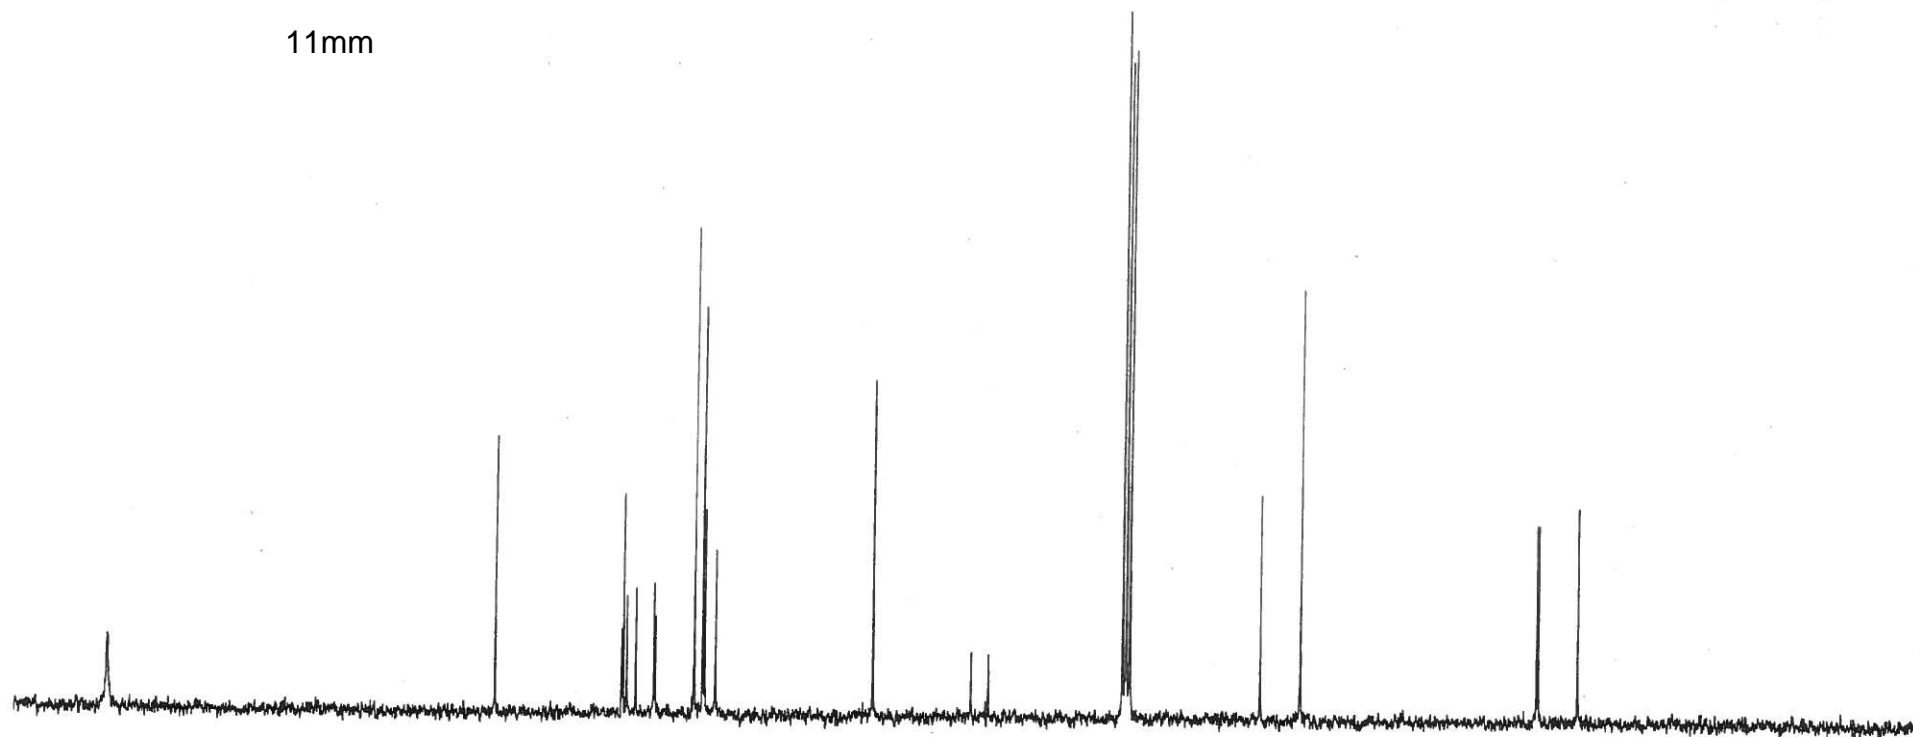

Trimethoxy-5-CC-CyclohepteneOAc Co2 (CO) 6 Nicholas  
 Experiment 6 Topspin 500  
 Friday 03 June 2011

7.270  
 6.970

897.182  
 891.564  
 885.496  
 833.319  
 827.753  
 822.606  
 817.458  
 809.700  
 803.212  
 797.969  
 793.123

3.925  
 3.892  
 3.873  
 3.316  
 2.585  
 2.564  
 2.543  
 1.794  
 1.783  
 1.771  
 1.666  
 1.655  
 1.645  
 1.635  
 1.619  
 1.606  
 1.595  
 1.586

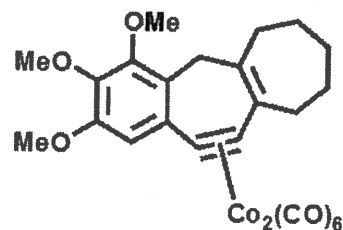

2n

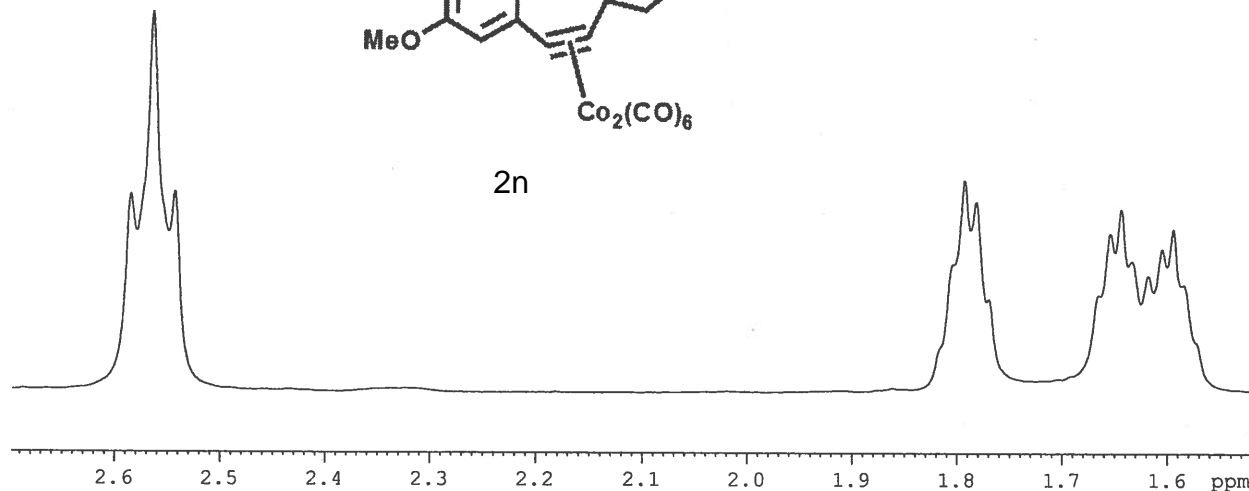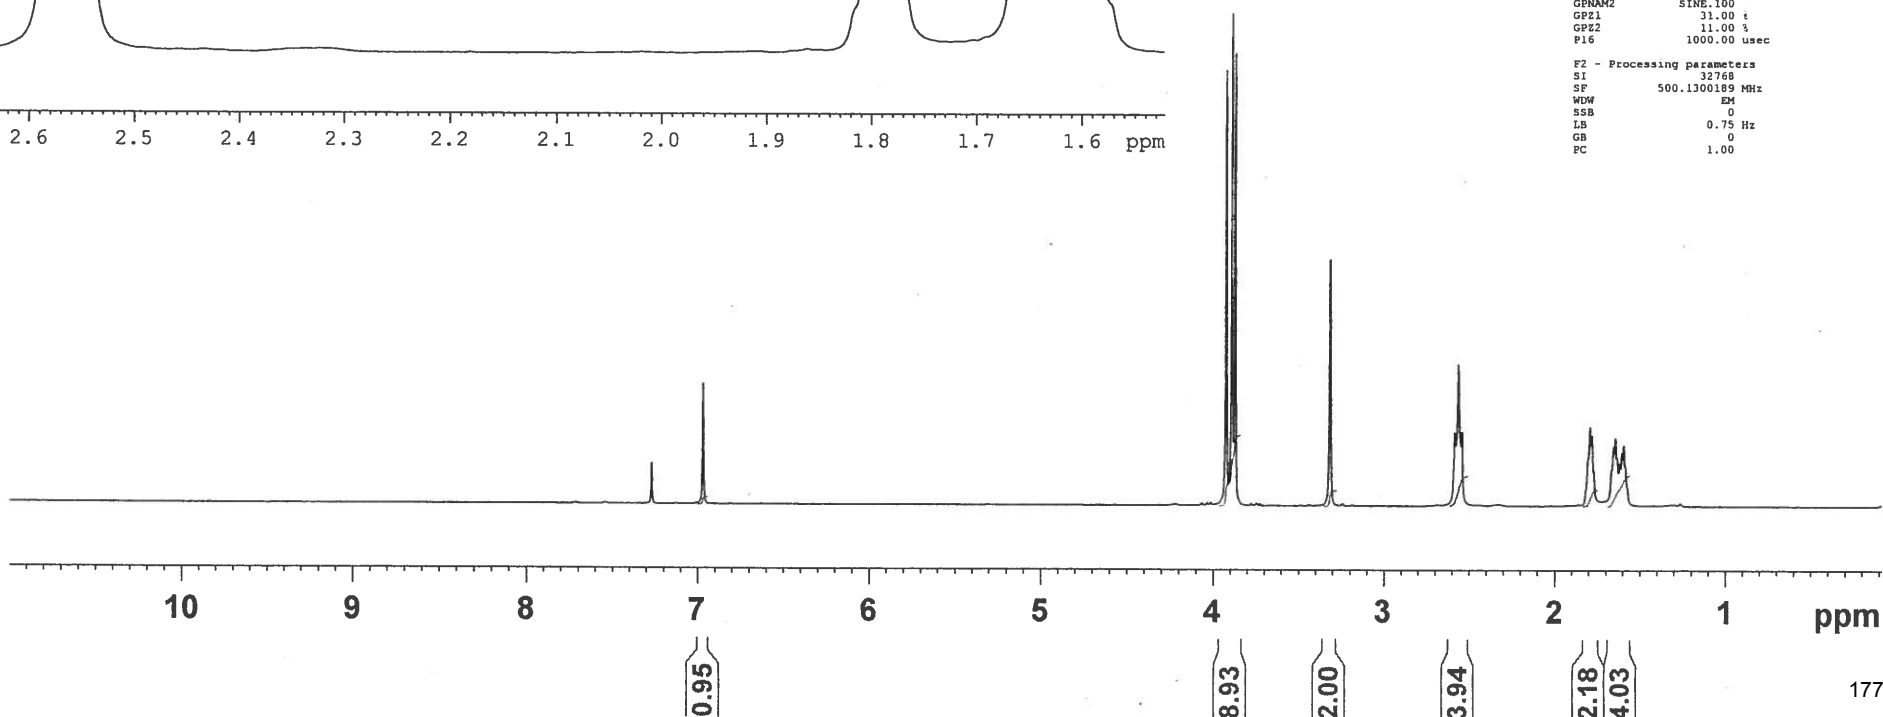

Current Data Parameters  
 NAME Trimethoxy-5-CC-CyclohepteneOAc Co2 (CO) 6 Nicholas  
 EXPNO 5  
 PROCNO 1  
 F2 - Acquisition Parameters  
 Date 20110603  
 Time 20.50  
 INSTRUM spect  
 PROBHD 5 mm PABBO BB/  
 PULPROG zgpg30  
 TD 32768  
 SOLVENT C6D6  
 NS 8  
 DS 2  
 SWH 10964.912 Hz  
 FIDRES 0.334623 Hz  
 AQ 1.4943165 sec  
 RG 228.1  
 DW 45.600 usec  
 DE 6.50 usec  
 TE 294.2 K  
 D1 2.00000000 sec  
 d12 0.00002000 sec  
 D16 0.00020000 sec  
 TD0 1  
 ===== CHANNEL f1 =====  
 NUC1 1H  
 P1 14.80 usec  
 P2 29.60 usec  
 P12 2000.00 usec  
 PL0 120.00 dB  
 PL1 -1.40 dB  
 SFO1 500.1304751 MHz  
 SP1 35.19 dB  
 SFOA1 Squal100.1000  
 SFOAL1 0.500  
 SPOFFS1 0.00 Hz  
 ===== GRADIENT CHANNEL =====  
 GPNAM1 SINE.100  
 GPNAM2 SINE.100  
 GP21 31.00 %  
 GP22 11.00 %  
 P16 1000.00 usec  
 F2 - Processing parameters  
 SI 32768  
 SF 500.1300189 MHz  
 WDW EM  
 SSB 0  
 LB 0.75 Hz  
 GB 0  
 PC 1.00

Trimethoxy-5-CC-CyclohepteneOAc Co<sub>2</sub>(CO)<sub>6</sub> Cyclized 13C  
 Experiment 2 Topspin ULtra 300  
 Date 13 June 2011

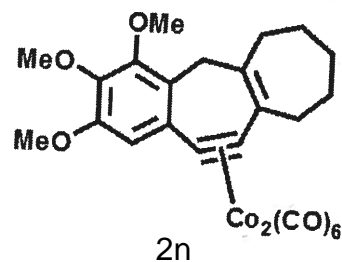

```

NAME Trimethoxy-5-CC-CyclohepteneOAc Co2(CO)6 Cyclized 13C
EXPNO 2
PROCNO 1
Date_ 20110614
Time_ 17.01
INSTRUM spect
PROBHD 5 mm PABBO BB-
PULPROG zgpg30
TD 16384
SOLVENT CDCl3
NS 22897
DS 4
SWH 17985.611 Hz
FIDRES 1.097755 Hz
AQ 0.4555252 sec
RG 20642.5
DW 27.800 usec
DE 6.00 usec
TE 294.5 K
D1 1.00000000 sec
D11 0.03000000 sec
TDO 1

===== CHANNEL f1 =====
NUC1 13C
P1 11.25 usec
PL1 0.00 dB
SFO1 75.4752953 MHz

===== CHANNEL f2 =====
CPOPRG2 waltz16
NUC2 1H
PCPD2 80.00 usec
PL2 0.00 dB
PL12 16.55 dB
PL13 24.00 dB
SFO2 300.1312005 MHz
SI 8192
SF 75.4677423 MHz
WDW EM
SSB 0
LB 2.50 Hz
GB 0
PC 1.40
  
```

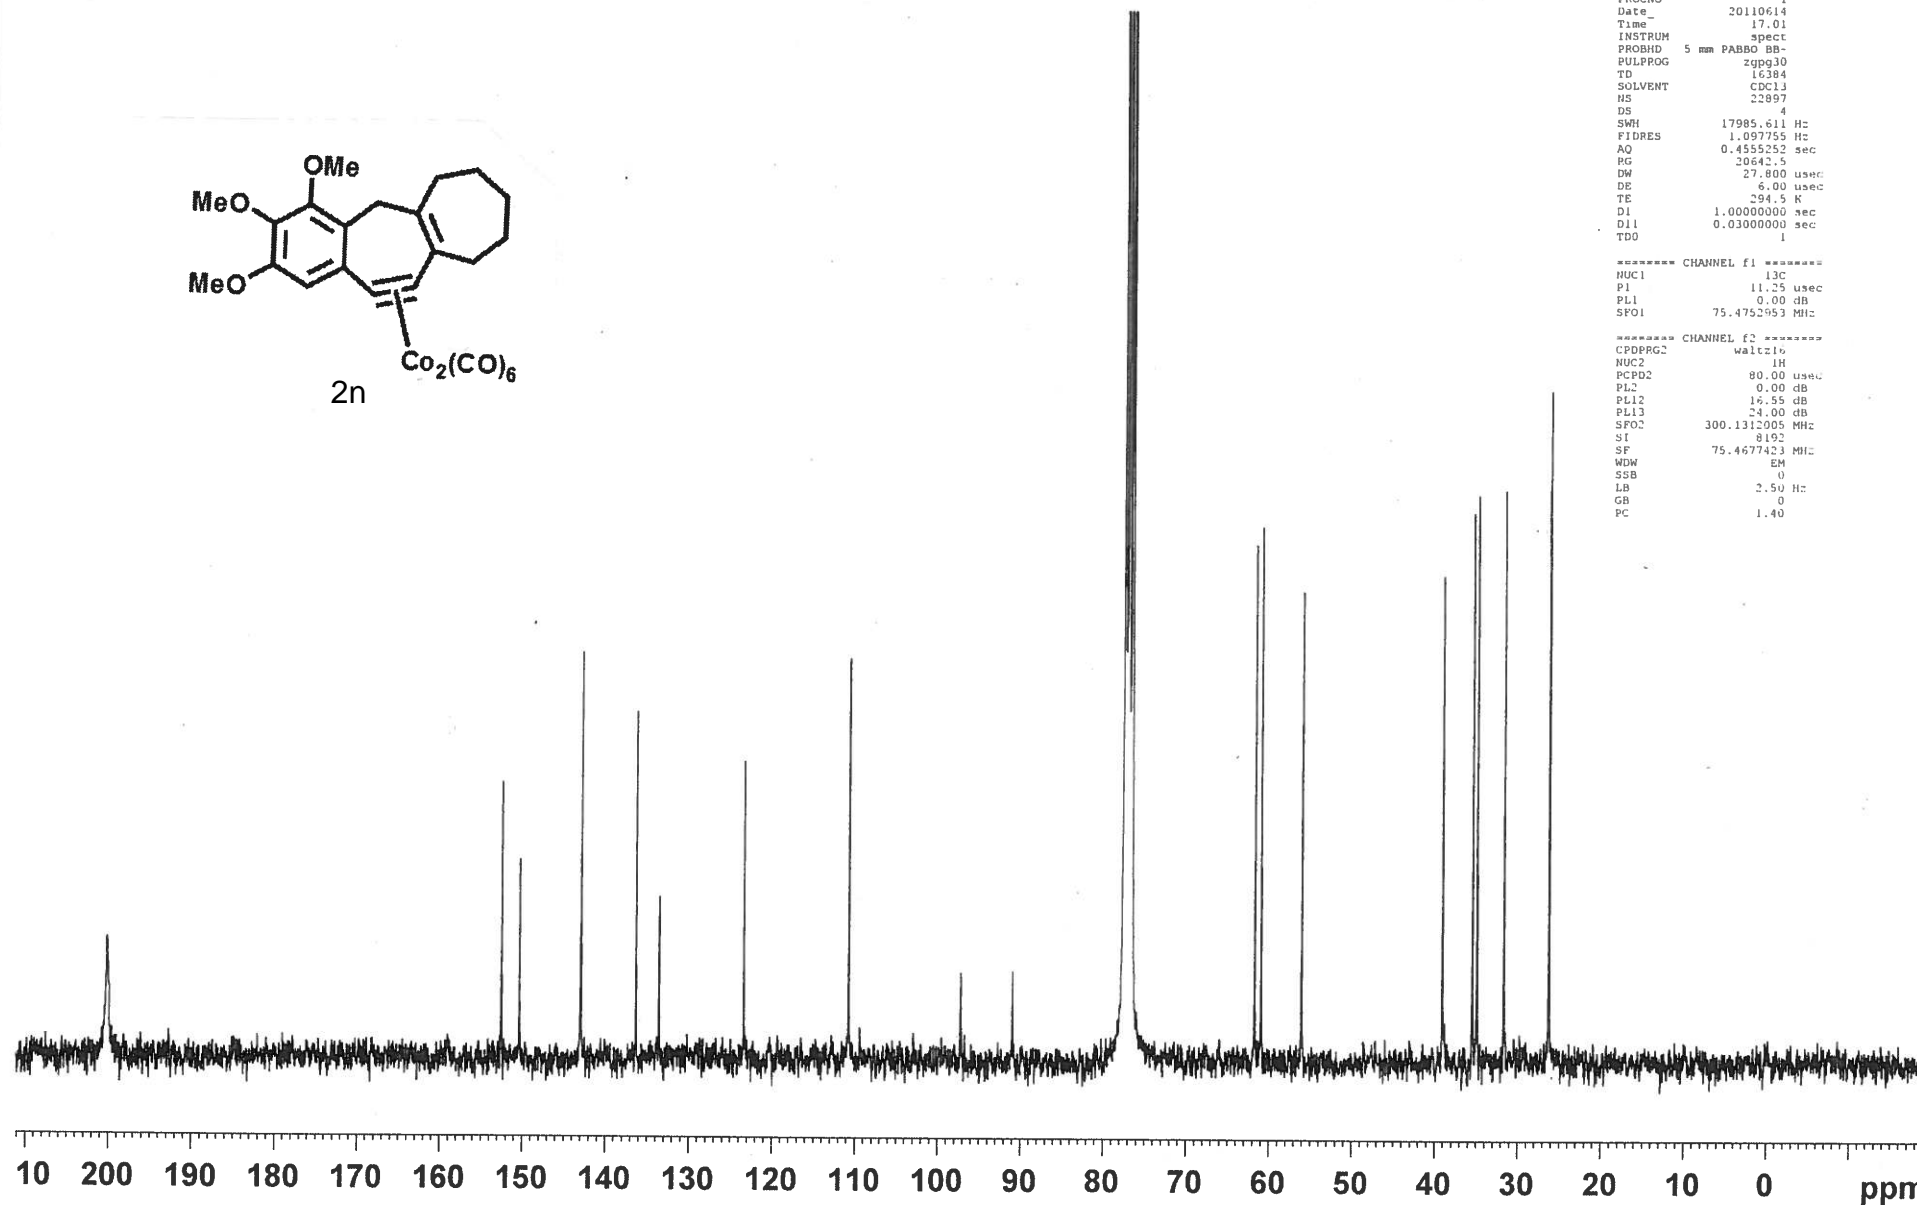

Wednesday 10 April 2013

| Current Data Parameters |                                                                |    |    |
|-------------------------|----------------------------------------------------------------|----|----|
| NAME                    | Dimethoxy-1,2-Isopropyl-CC-CyclohexeneOAc Cyclized Minor SnCl4 |    |    |
| EXPNO                   | 2                                                              |    |    |
| PROCNO                  | 1                                                              | 31 | 70 |

```

Date_                20130410
Time                 16.59
INSTRUM              spect
PROBHD              5 mm PABBO BB/
PULPROG              zgpg30
TD                  32768
SOLVENT              CDCl3
NS                   16
DS                   2
SWH                  11029.412 Hz
FIDRES              0.363591 Hz
AQ                  1.4854827 sec
RG                  203.82
DW                  45.333 usec
DE                  6.50 usec
TE                   294.0 K
D1                  1.00000000 sec
D12                 0.00002000 sec
D16                 0.00020000 sec
TD0                  .1

```

```

SFO1          500.1300000 MHz
NUC1          1H
P1            14.80 usec
P2            29.60 usec
P12           2000.00 usec
PLW0          0 W
PLW1          12.23400021 W
SPNAM[1]      Squa100.1000
SPOAL1        0.500
SPOFFS1       0 Hz
SPW1          0.00267970 W

```

```
GPNAME[1]      SMSQ10.100
GPNAME[2]      SMSQ10.100
GPZ1           31.00 %
GPZ2           11.00 %
P16            1000.00 usec
```

|     |                 |
|-----|-----------------|
| SI  | 32768           |
| SF  | 500.1300076 MHz |
| WDW | no              |
| SSB | 0               |
| LB  | 0 Hz            |
| GB  | 0               |
| PC  | 1.00            |

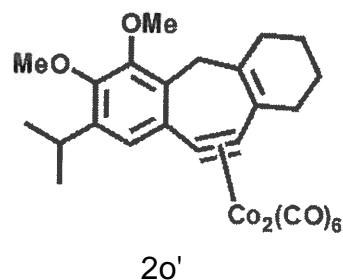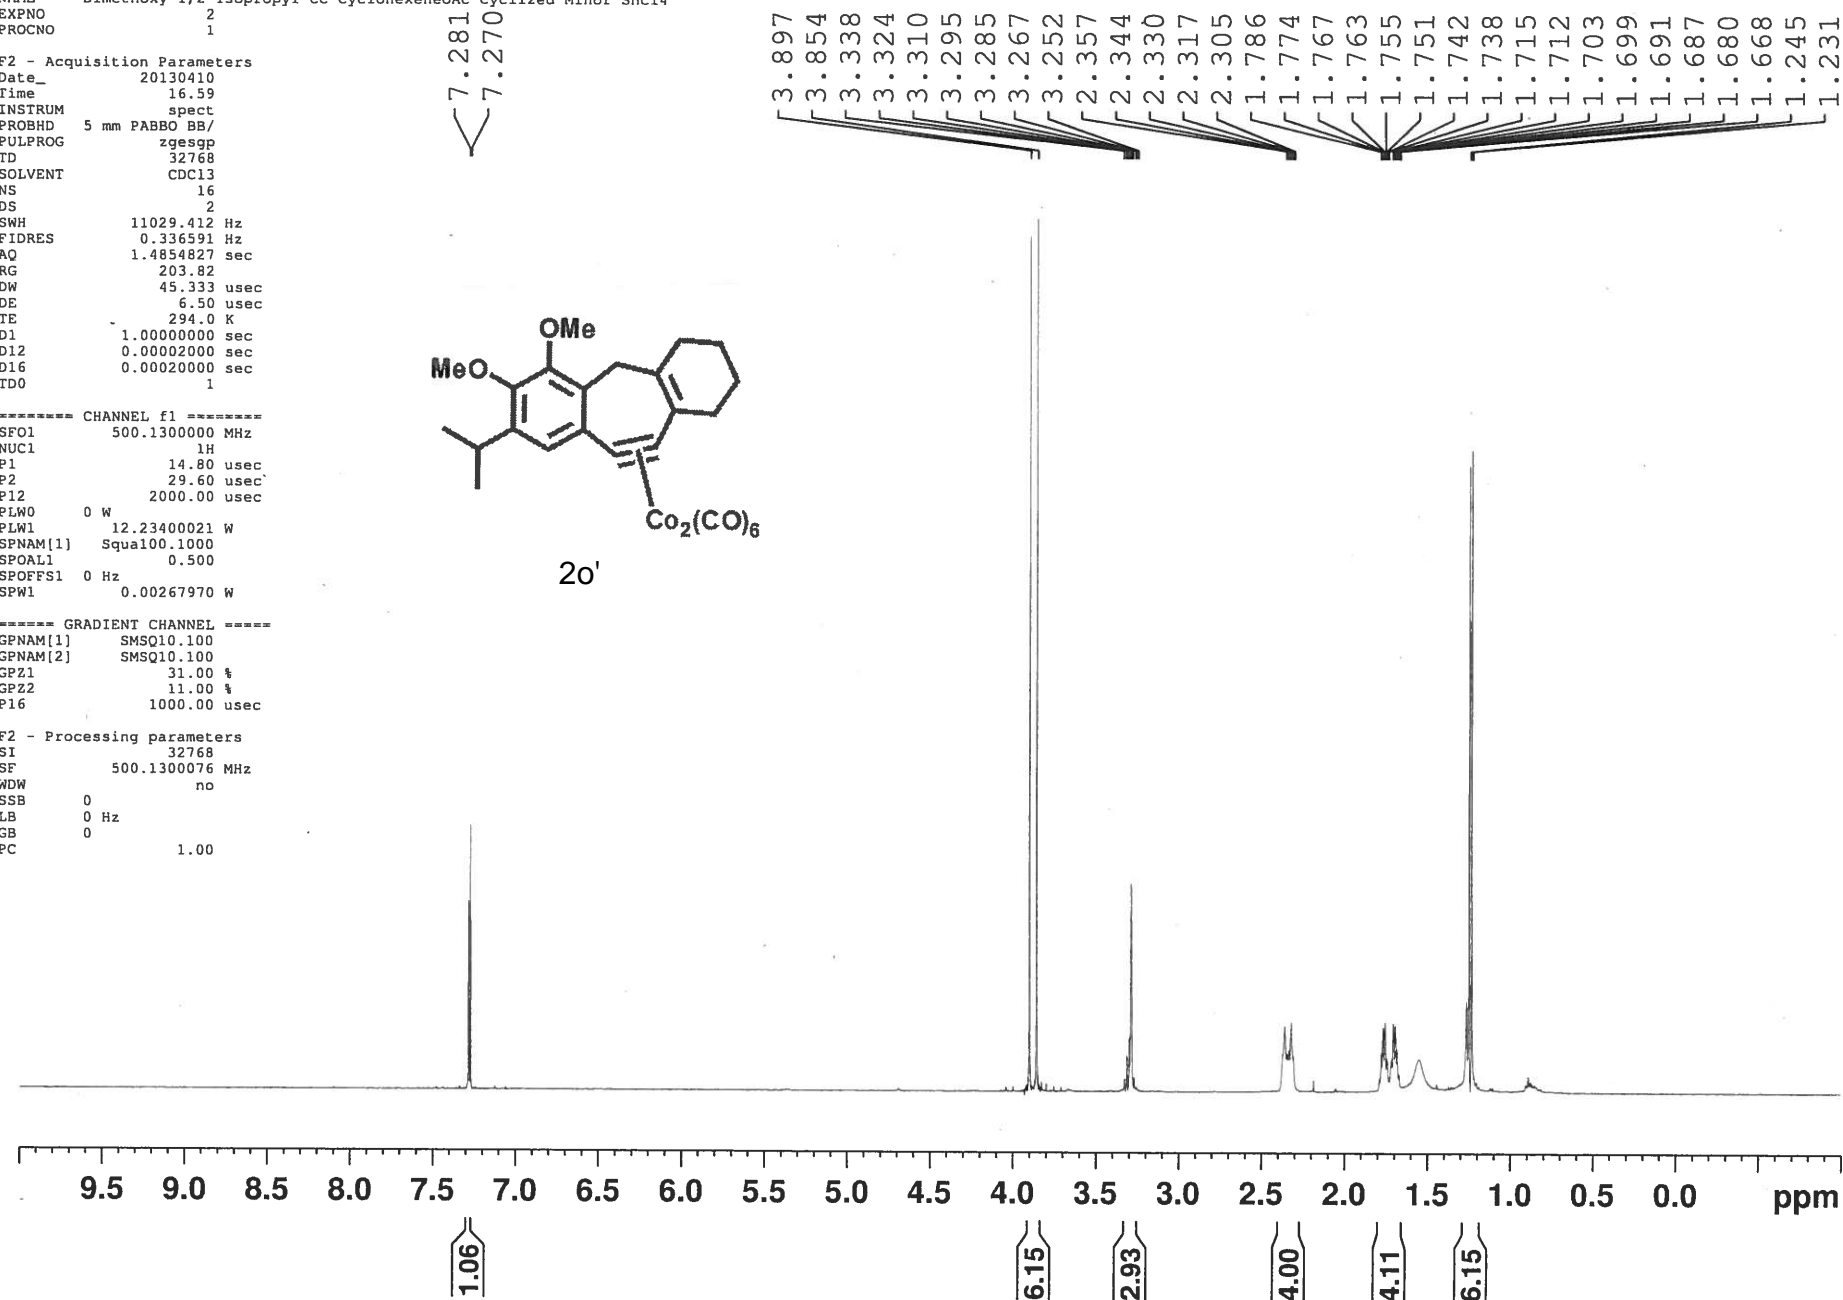

Saturday 22 June 2013

—200.124—

$\sim 150.971$   
 $\sim 149.522$   
 $\sim 141.479$   
 $\sim 136.584$   
 $\sim 133.833$   
 $\sim 131.039$   
 $\sim 128.296$   
 $\sim 125.251$

— 95.047  
— 90.564

-77.262  
-77.008  
-76.754

$$\begin{array}{r} 60.998 \\ 60.645 \end{array}$$
$$\begin{array}{r} 33.743 \\ - 32.968 \\ \hline 30.480 \\ - 26.881 \\ \hline 23.440 \\ - 23.049 \\ \hline 22.723 \end{array}$$
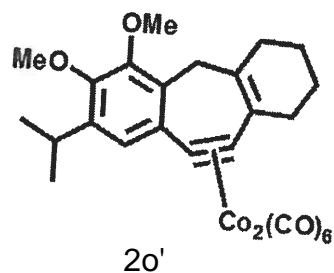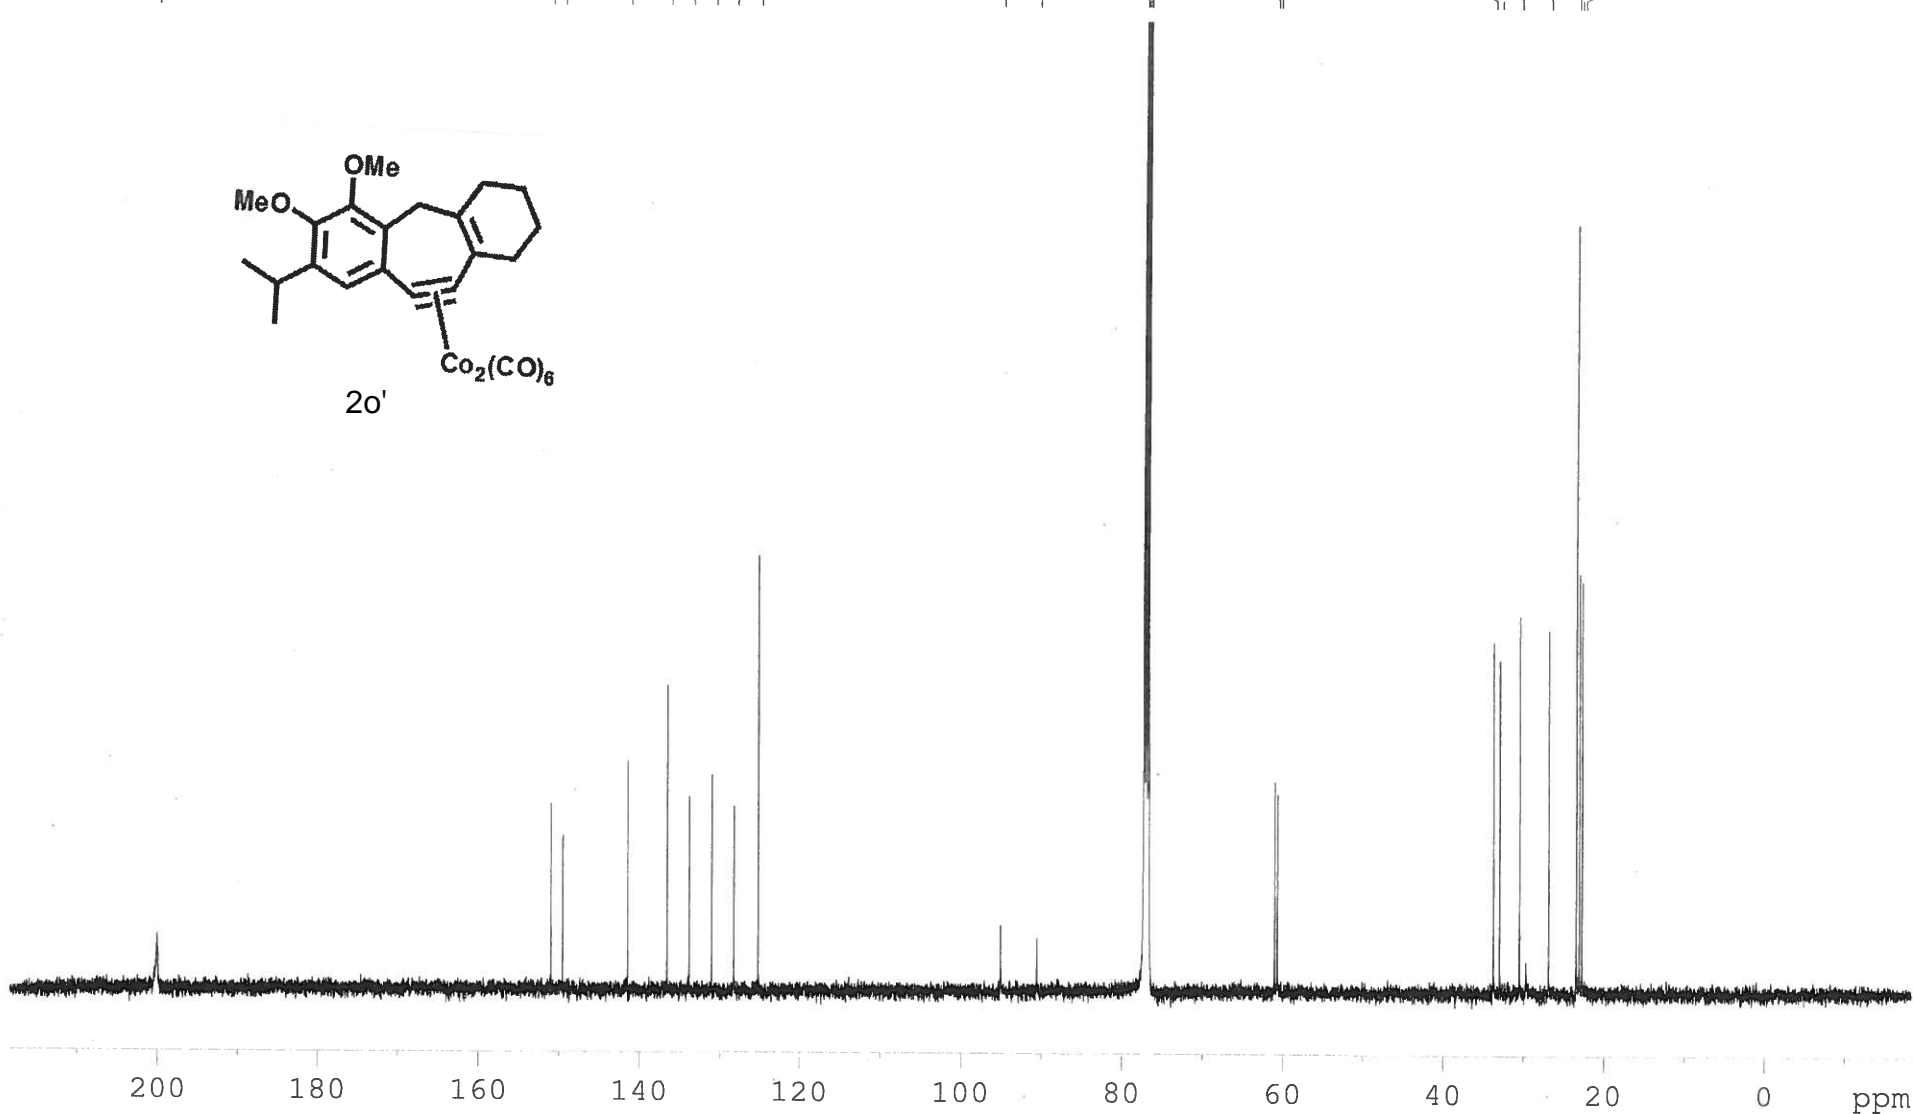



# Dimethoxy-1,2-Isopropyl-CC-CyclohexeneOAc Cyclized Major SnCl4

Experiment 2 Topspin 500 3.1

Wednesday 10 April 2013

Current Data Parameters  
NAME Dimethoxy-1,2-Isopropyl-CC-CyclohexeneOAc Cyclized Major SnCl4  
EXPNO 2  
PROCNO 1

F2 - Acquisition Parameters  
Date\_ 20130410  
Time 16.24  
INSTRUM spect  
PROBHD 5 mm PABBO BB/  
PULPROG zgpg30  
TD 32768  
SOLVENT CDCl3  
NS 16  
DS 2  
SWH 11029.412 Hz  
FIDRES 0.336591 Hz  
AQ 1.4854827 sec  
RG 82.19  
DW 45.333 usec  
DE 6.50 usec  
TE 294.0 K  
D1 1.00000000 sec  
D12 0.00002000 sec  
D16 0.00020000 sec  
TDO 1

===== CHANNEL f1 =====  
SFO1 500.1302001 MHz  
NUC1 1H  
P1 14.80 usec  
P2 29.60 usec  
P12 2000.00 usec  
PLW0 0 W  
PLW1 12.23400021 W  
SPNAM[1] Squa100.1000  
SFOAL1 0.500  
SPOFFS1 0 Hz  
SPW1 0.00267970 W

===== GRADIENT CHANNEL =====  
GPNAM[1] SMSQ10.100  
GPNAM[2] SMSQ10.100  
GPZ1 31.00 %  
GPZ2 11.00 %  
P16 1000.00 usec

F2 - Processing parameters  
SI 32768  
SF 500.1300075 MHz  
WDW no  
SSB 0  
LB 0 Hz  
GB 0  
PC 1.00

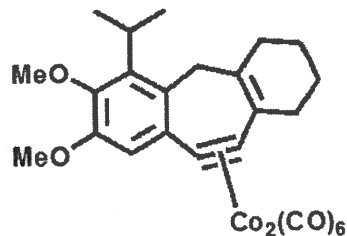

20

3.885  
3.528  
3.514  
3.500  
3.485  
3.471  
3.146  
2.372  
2.356  
2.339  
2.328  
1.801  
1.789  
1.782  
1.778  
1.770  
1.767  
1.758  
1.754  
1.732  
1.728  
1.720  
1.716  
1.709  
1.705  
1.698  
1.686  
1.412  
1.397

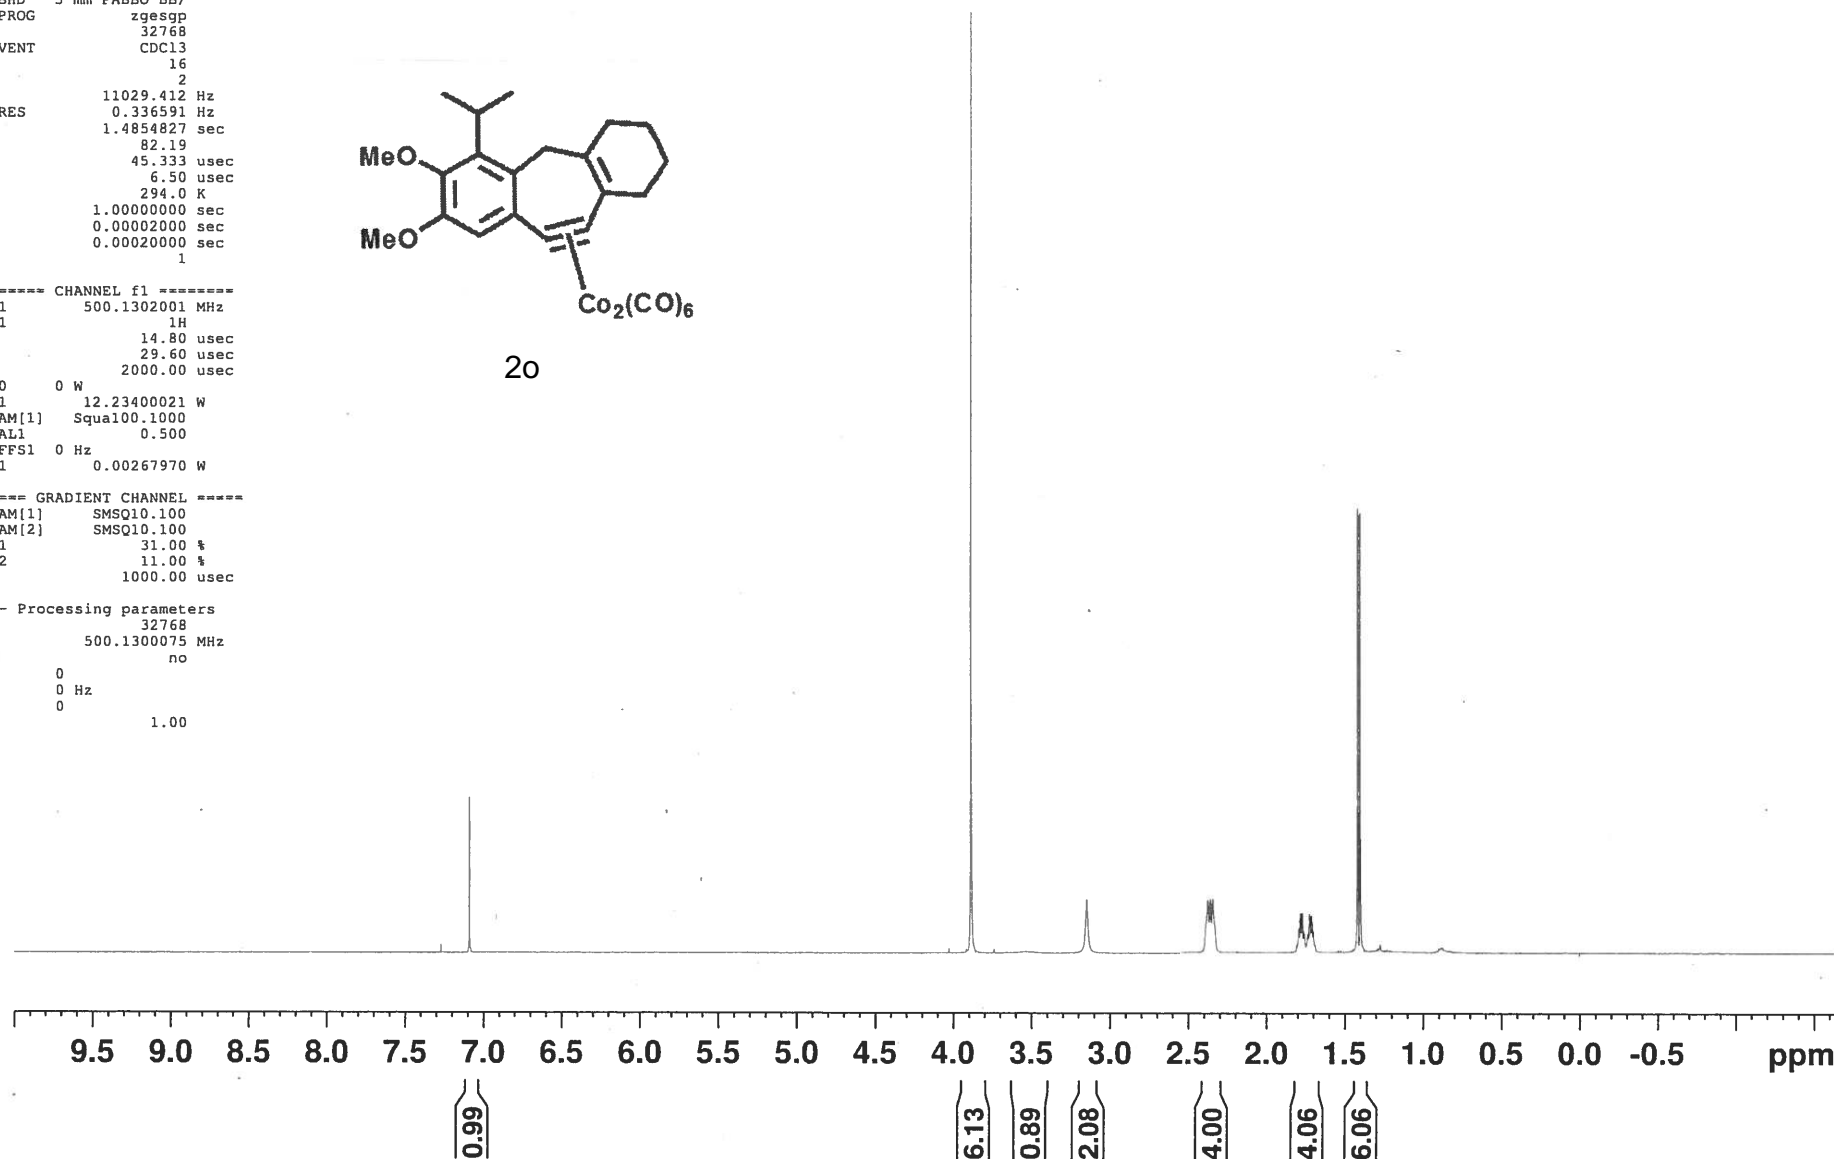

RosmarDerivative Cyclized Major SnCl4 13C  
 Topspin 300  
 Wednesday 10 April 2013

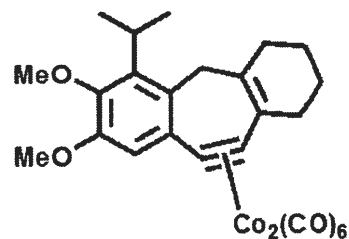

20

Current Data Parameters  
 NAME RosmarDerivative Cyclized Major SnCl4 13C  
 EXPNO 1  
 PROCNO 1

F2 - Acquisition Parameters  
 Date 20130411  
 Time 0.04  
 INSTRUM spect  
 PROBD 5 mm BBO BB 1H  
 PULPROG zgpg30  
 TD 32768  
 SOLVENT CDCl3  
 HS 1725  
 DS 4  
 SWH 17995.611 Hz  
 FIDRES 0.548977 Hz  
 AQ 0.9110004 sec  
 RG 4597.6  
 DW 27.900 usec  
 DE 6.00 usec  
 TE 300.2 K  
 D1 1.5000000 sec  
 d11 0.0300000 sec  
 DELTA 1.1000000 sec  
 TDO 1

\*\*\*\*\* CHANNEL f1 \*\*\*\*\*  
 NUCL1 13C  
 P1 14.00 usec  
 PL1 0.00 dB  
 SFO1 75.5004429 MHz

\*\*\*\*\* CHANNEL f2 \*\*\*\*\*  
 CPDPRG2 waltz16  
 NUCL2 1H  
 PCPD2 79.90 usec  
 PL2 0.00 dB  
 PL12 14.30 dB  
 PL13 19.31 dB  
 SFO2 300.2320000 MHz

F2 - Processing parameters  
 SI 32768  
 SF 75.4929912 MHz  
 NUF 1  
 ESF 1  
 LB 2.00 Hz  
 GB 0  
 PC 1.40

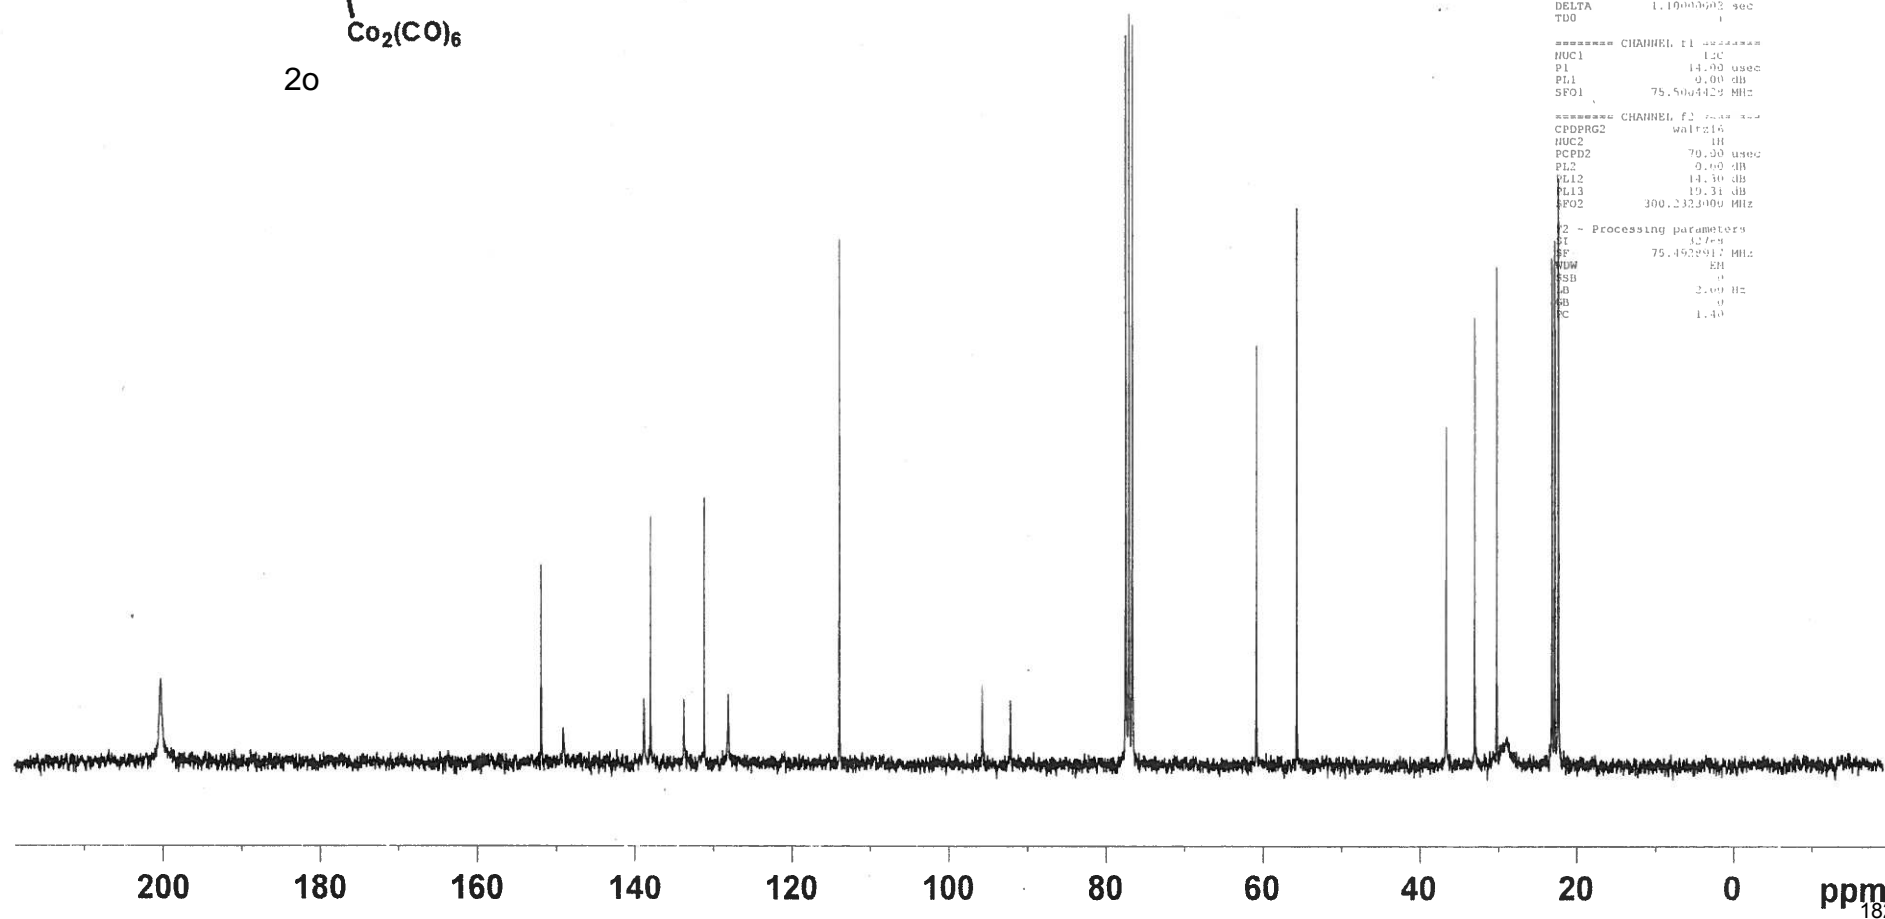

Thiophene-3-CC-CyclohexeneOAc Cyclized Co<sub>2</sub>(CO)<sub>6</sub>  
 Experiment 2 Topspin 500  
 Wednesday 21 September 2011

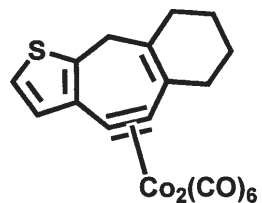

2p

7.270  
7.207  
7.197  
7.158  
7.147

3.431  
2.415  
2.404  
2.391  
2.209  
2.196  
2.184  
1.792  
1.780  
1.773  
1.769  
1.760  
1.757  
1.744  
1.730  
1.727  
1.719  
1.715  
1.709  
1.696

Current Data Parameters  
 NAME Thiophene-3-CC-CyclohexeneOAc Cyclized Co<sub>2</sub>(CO)<sub>6</sub>  
 EXPHO 2  
 PROCNO 1

F2 - Acquisition Parameters  
 Date\_ 20110921  
 Time 13.58  
 INSTRUM spect  
 PROBHD 5 mm PABBO BB/  
 PULPROG zgpg30  
 TD 32768  
 SOLVENT C606  
 NS 8  
 DS 2  
 SWH 10964.912 Hz  
 FIDRES 0.334623 Hz  
 AQ 1.4942708 sec  
 RG 101.6  
 DW 45.600 usec  
 DE 6.50 usec  
 TE 295.2 K  
 D1 2.00000000 sec  
 d12 0.00000000 sec  
 D16 0.00000000 sec  
 TDO 1

===== CHANNEL f1 =====  
 NUCL1 1H  
 P1 14.80 usec  
 P2 25.60 usec  
 P12 2000.00 usec  
 PL0 120.00 dB  
 PL1 -1.40 dB  
 SFO1 500.1305251 MHz  
 SP1 35.19 dB  
 SFOH1 Squa100.1000  
 SFOAL1 0.500  
 SFOFS1 0.00 Hz

===== GRADIENT CHANNEL =====  
 GRAM1 SINE.100  
 GRAM2 SINE.100  
 GPZ1 31.00 %  
 GPZ2 11.00 %  
 PL0 1000.00 usec

F2 - Processing Parameters  
 SI 32768  
 SF 500.1300188 MHz  
 WDW EM  
 SSB 0  
 LB -0.50 Hz  
 GB 0  
 PC 1.00

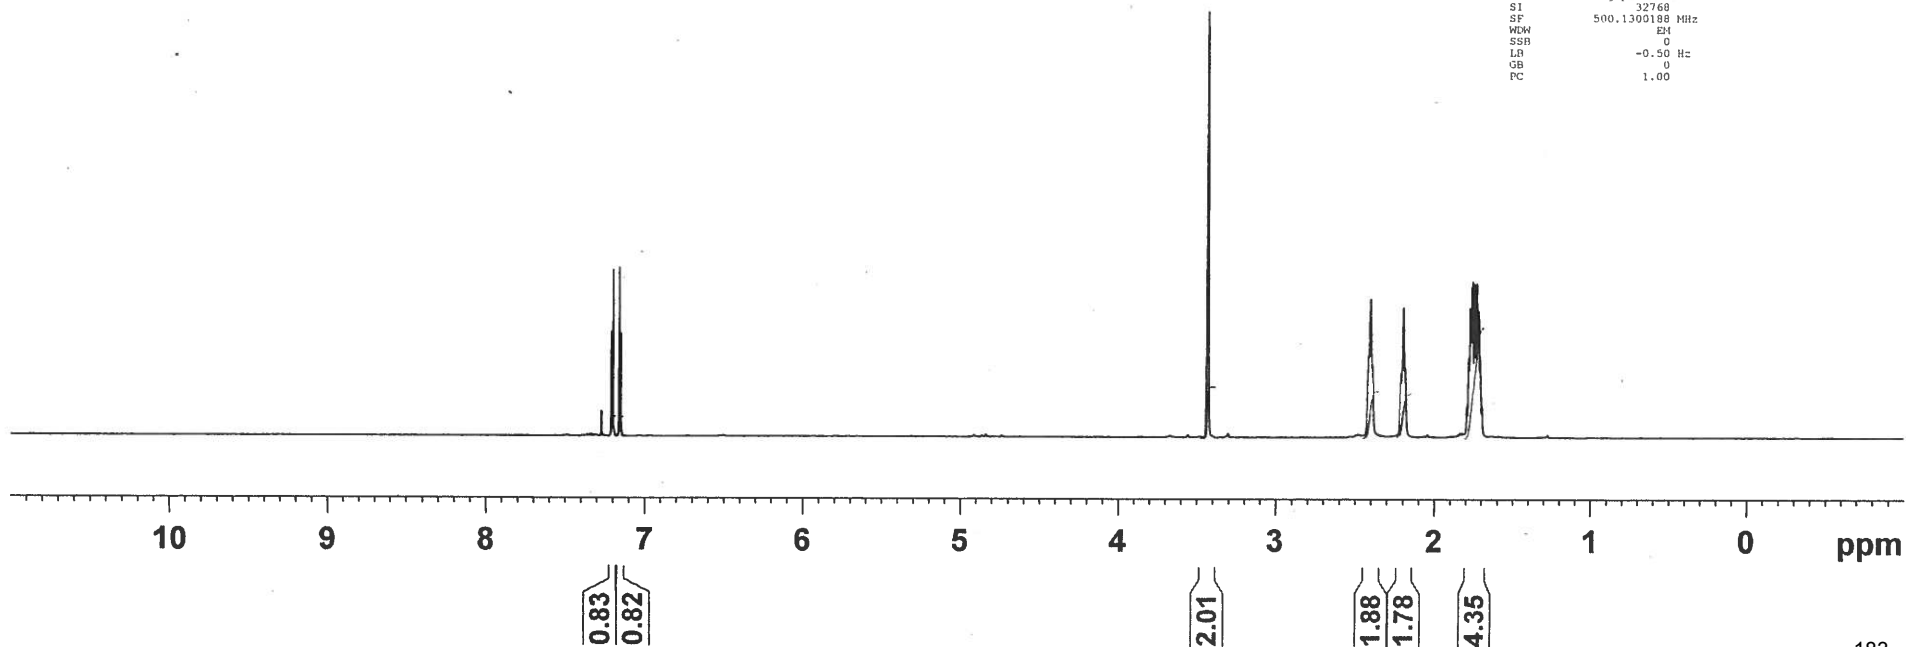

Thiophene-3-CC-CyclohexeneOAc Cyclized Co<sub>2</sub>(CO)<sub>6</sub> 13C  
 Experiment 1 Topspin ULtra 300  
 Wednesday 21 September 2011

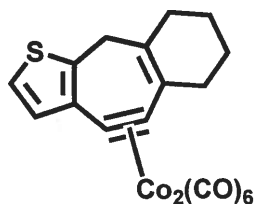

2p

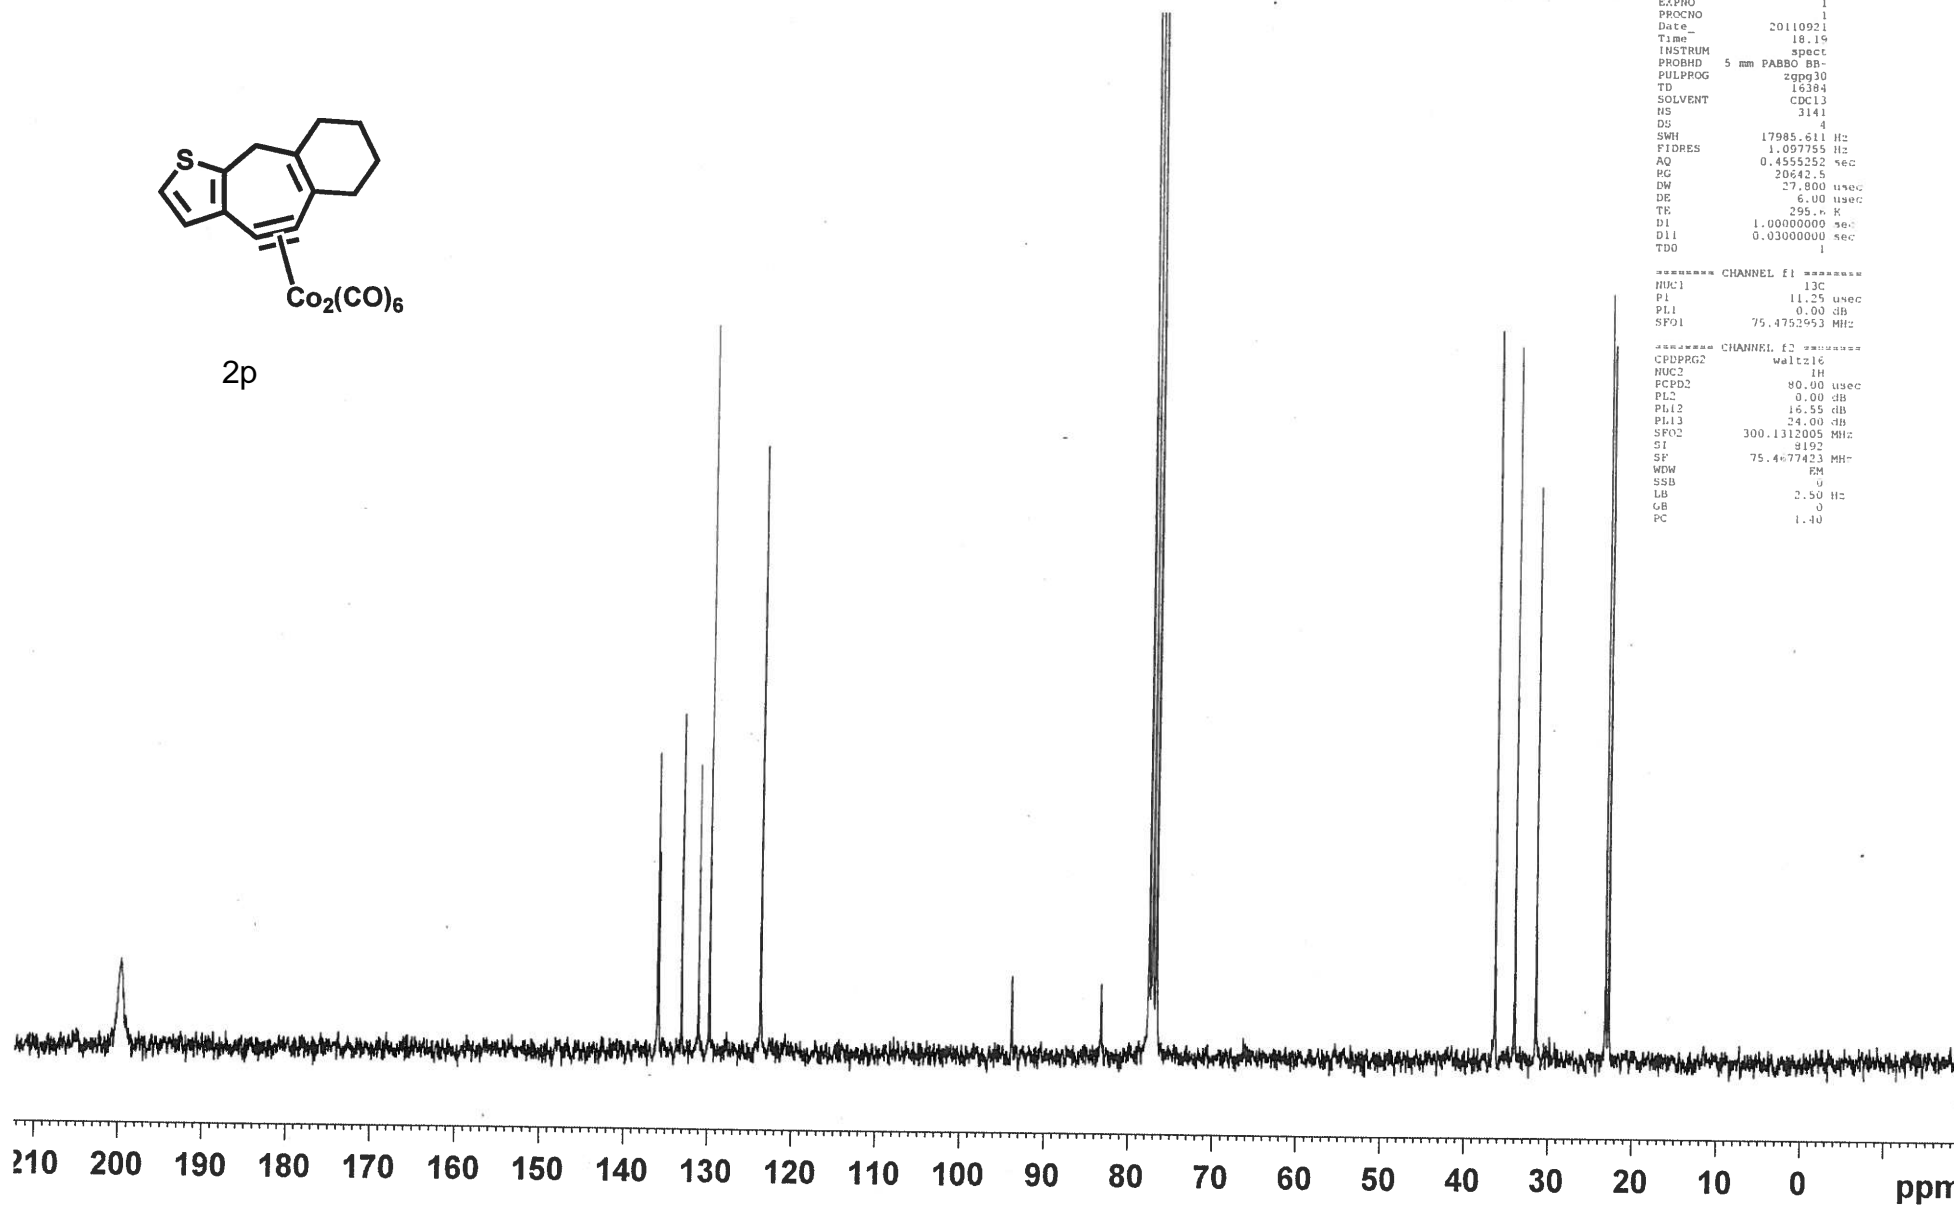

NAME Thiophene-3-CC-CyclohexeneOAc Cyclized Co<sub>2</sub>(CO)<sub>6</sub> 1  
 EXPNO 1  
 PROCNO 1  
 Date\_ 20110921  
 Time 18.19  
 INSTRUM spect  
 PROBHD 5 mm PABBO BB-  
 PULPROG zgpg30  
 TD 16384  
 SOLVENT CDCl<sub>3</sub>  
 NS 3141  
 DS 4  
 SWH 17985.611 Hz  
 FIDRES 1.097755 Hz  
 AQ 0.4555252 sec  
 RG 20642.5  
 DW 27.800 usec  
 DE 6.00 usec  
 TE 295.2 K  
 D1 1.00000000 sec  
 D11 0.03000000 sec  
 TDO 1

===== CHANNEL f1 =====  
 NUC1 13C  
 P1 11.25 usec  
 PL1 0.00 dB  
 SFO1 75.4752953 MHz

===== CHANNEL f2 =====  
 CPDPRG2 Waltz16  
 NUC2 1H  
 PCPD2 80.00 usec  
 PL2 0.00 dB  
 PL12 16.55 dB  
 PL13 24.00 dB  
 SFO2 300.1312005 MHz  
 SI 8192  
 SF 75.477423 MHz  
 WDW EM  
 SSB 0  
 LB 2.50 Hz  
 GB 0  
 PC 1.40

CyclohexeneOAc-CC-TMS  
Experiment 2 Topspin 500 3.1  
Friday 23 November 2012

—7.154

—4.937

2.092  
2.080  
2.068  
1.923  
1.911  
1.898  
1.660  
1.332  
1.326  
1.321  
1.319  
1.313  
1.308  
1.302  
1.298  
1.289  
1.286  
1.279  
1.277  
1.274  
1.267  
1.262

Current Data Parameters  
NAME CyclohexeneOAc-CC-TMS  
EXPNO 2  
PROCNO 1

F2 - Acquisition Parameters  
Date\_ 20121123  
Time\_ 21.19  
INSTRUM spect  
PROBHD 5 mm PABBO BB/  
PULPROG zgpg30  
TD 32768  
SOLVENT C6D6  
NS 16  
DS 2  
SWH 11029.412 Hz  
FIDRES 0.336591 Hz  
AQ 1.4854827 sec  
RG 11.5  
DW 45.333 usec  
DE 6.50 usec  
TE 293.3 K  
D1 1.00000000 sec  
D12 0.00002000 sec  
D16 0.00020000 sec  
TDO 1

===== CHANNEL f1 =====  
SFO1 500.1317505 MHz  
NUC1 1H  
P1 14.80 usec  
P2 29.60 usec  
P12 2000.00 usec  
PLW0 0 W  
PLW1 12.23400021 W  
SPNAM[1] Squa100.1000  
SPOAL1 0.500  
SPOFFS1 0 Hz  
SPW1 0.00267970 W

===== GRADIENT CHANNEL =====  
GPNAM[1] SMSQ10.100  
GPNAM[2] SMSQ10.100  
GPZ1 31.00 %  
GPZ2 11.00 %  
P16 1000.00 usec

F2 - Processing parameters  
SI 32768  
SF 500.1300000 MHz  
WDW no  
SSB 0  
LB 0 Hz  
GB 0  
PC 1.00

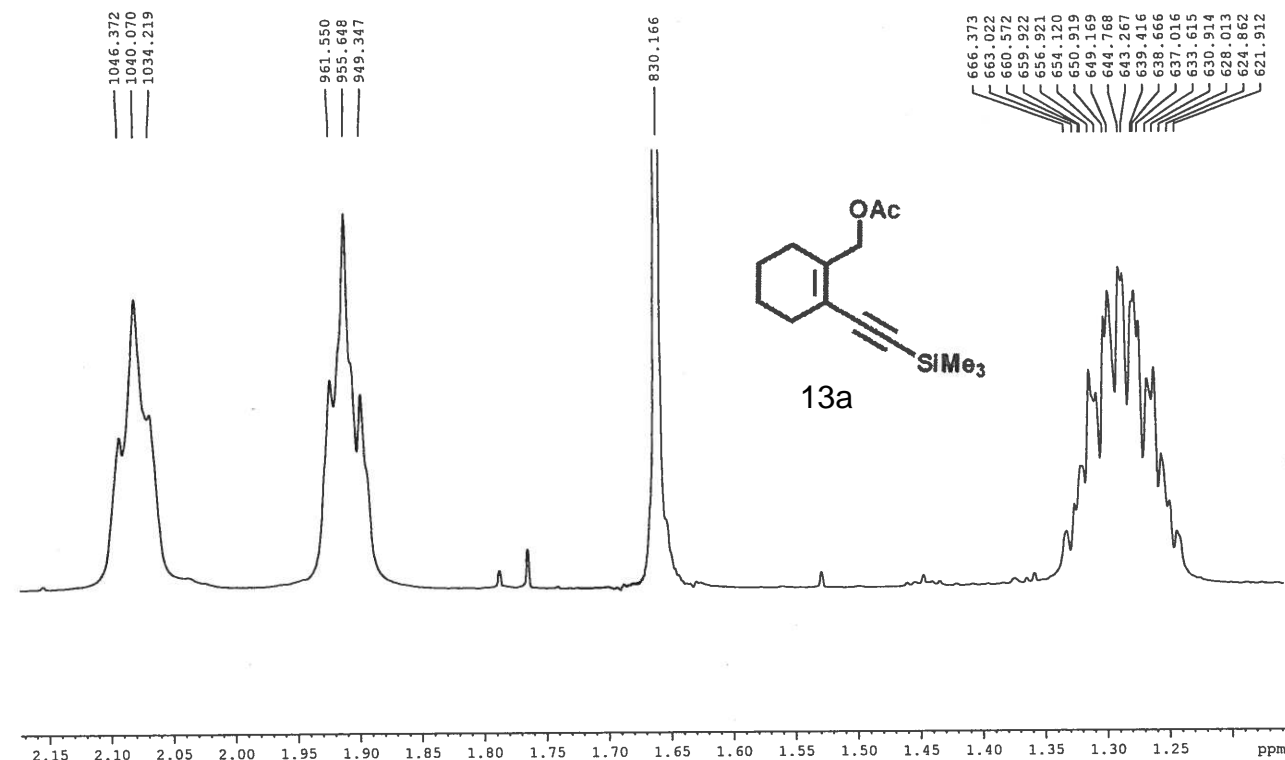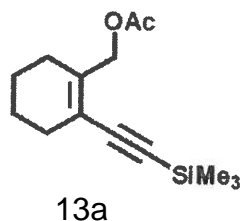

2.08  
2.31  
3.02  
4.30  
9.06

clohexeneOAc-2-CC-TMS 13C  
 periment 1 Ultra Topspin 300  
 iday 23 November 2012

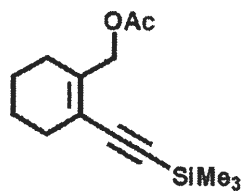

13a

```

NAME      CyclohexeneOAc-2-CC-TMS 13C
EXPNO     1
PROCNO    1
Date_     20121123
Time      17.24
INSTRUM   spect
PROBHD    5 mm PABBO BB-
PULPROG   zgpg30
TD        16384
SOLVENT   C6D6
NS        111
DS        4
SWH       17985.611 Hz
FIDRES    1.097755 Hz
AQ        0.4555252 sec
RG        20642.5
DW        27.800 usec
DE        6.00 usec
TE        295.0 K
D1        1.00000000 sec
D11       0.03000000 sec
TD0       1
  
```

```

===== CHANNEL f1 =====
NUC1      13C
P1        11.25 usec
PL1       0.00 dB
SFO1      75.4752953 MHz
  
```

```

===== CHANNEL f2 =====
CPDPRG2   waltz16
NUC2      1H
PCPD2     80.00 usec
PL2       0.00 dB
PL12      16.55 dB
PL13      24.00 dB
SFO2      300.1312005 MHz
SI        8192
SF        75.4677423 MHz
WDW       EM
SSB       0
LB        2.50 Hz
GB        0
PC        1.40
  
```

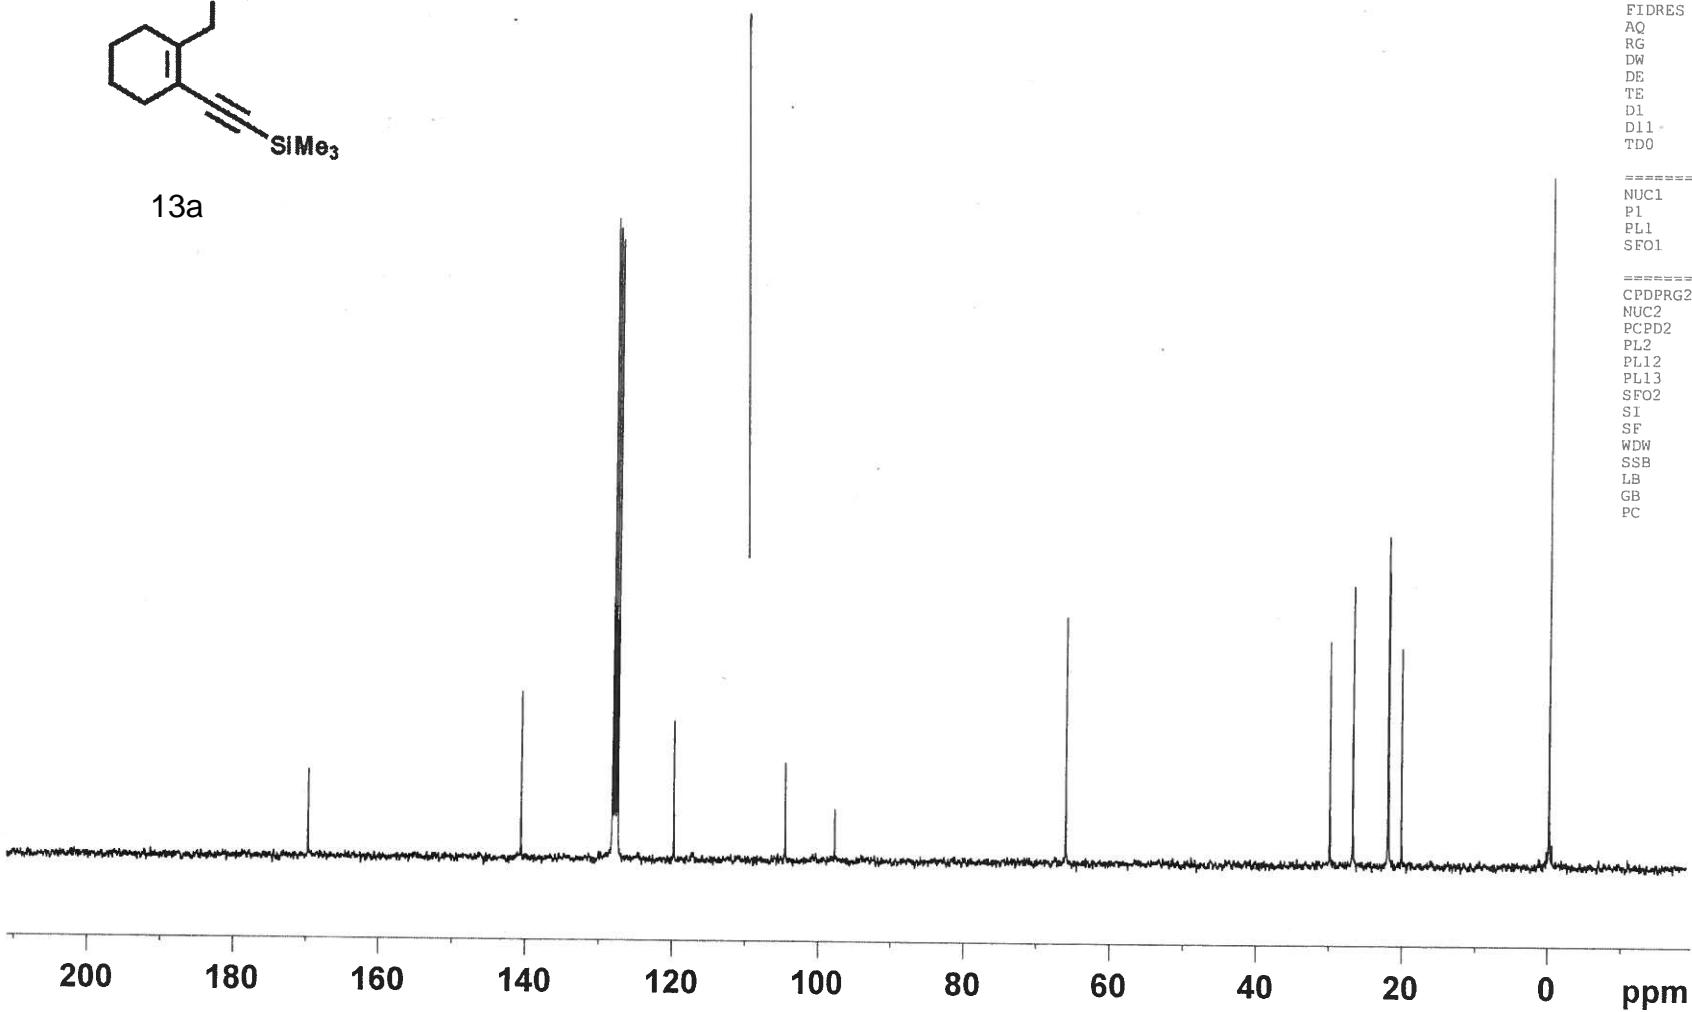

Cycloheptenecarbaldehyde-TMSacetylene-2  
 Experiment 1  
 Topspin 500  
 Thursday 16 February 2012

Current Data Parameters  
 NAME Cycloheptenecarbaldehyde-TMSacetylene-2  
 EXPNO 1  
 PROCNO 1

F2 - Acquisition Parameters  
 Date\_ 20120216  
 Time\_ 15.47  
 INSTRUM spect  
 PROBHD 5 mm PABBO BB/  
 PULPROG zg  
 TD 65536  
 SOLVENT MeOD  
 NS 8  
 DS 2  
 SWH 10330.578 Hz  
 FIDRES 0.157632 Hz  
 AQ 3.1719923 sec  
 RG 10.1  
 DW 48.400 usec  
 DE 6.50 usec  
 TE 294.2 K  
 D1 1.00000000 sec  
 TD0 1

===== CHANNEL f1 =====  
 NUC1 1H  
 P1 10.00 usec  
 PL1 0.00 dB  
 SFO1 500.1330880 MHz

F2 - Processing parameters  
 SI 65536  
 SF 500.1300187 MHz  
 WDW EM  
 SSB 0  
 LB 1.00 Hz  
 GB 0  
 PC 1.00

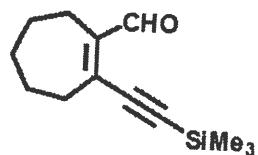

7.270

2.553  
 2.542  
 2.531  
 2.445  
 2.434  
 2.423  
 1.764  
 1.752  
 1.741  
 1.729  
 1.717  
 1.605  
 1.593  
 1.582  
 1.572  
 1.560  
 1.403  
 1.391  
 1.381  
 1.370  
 1.358  
 0.173

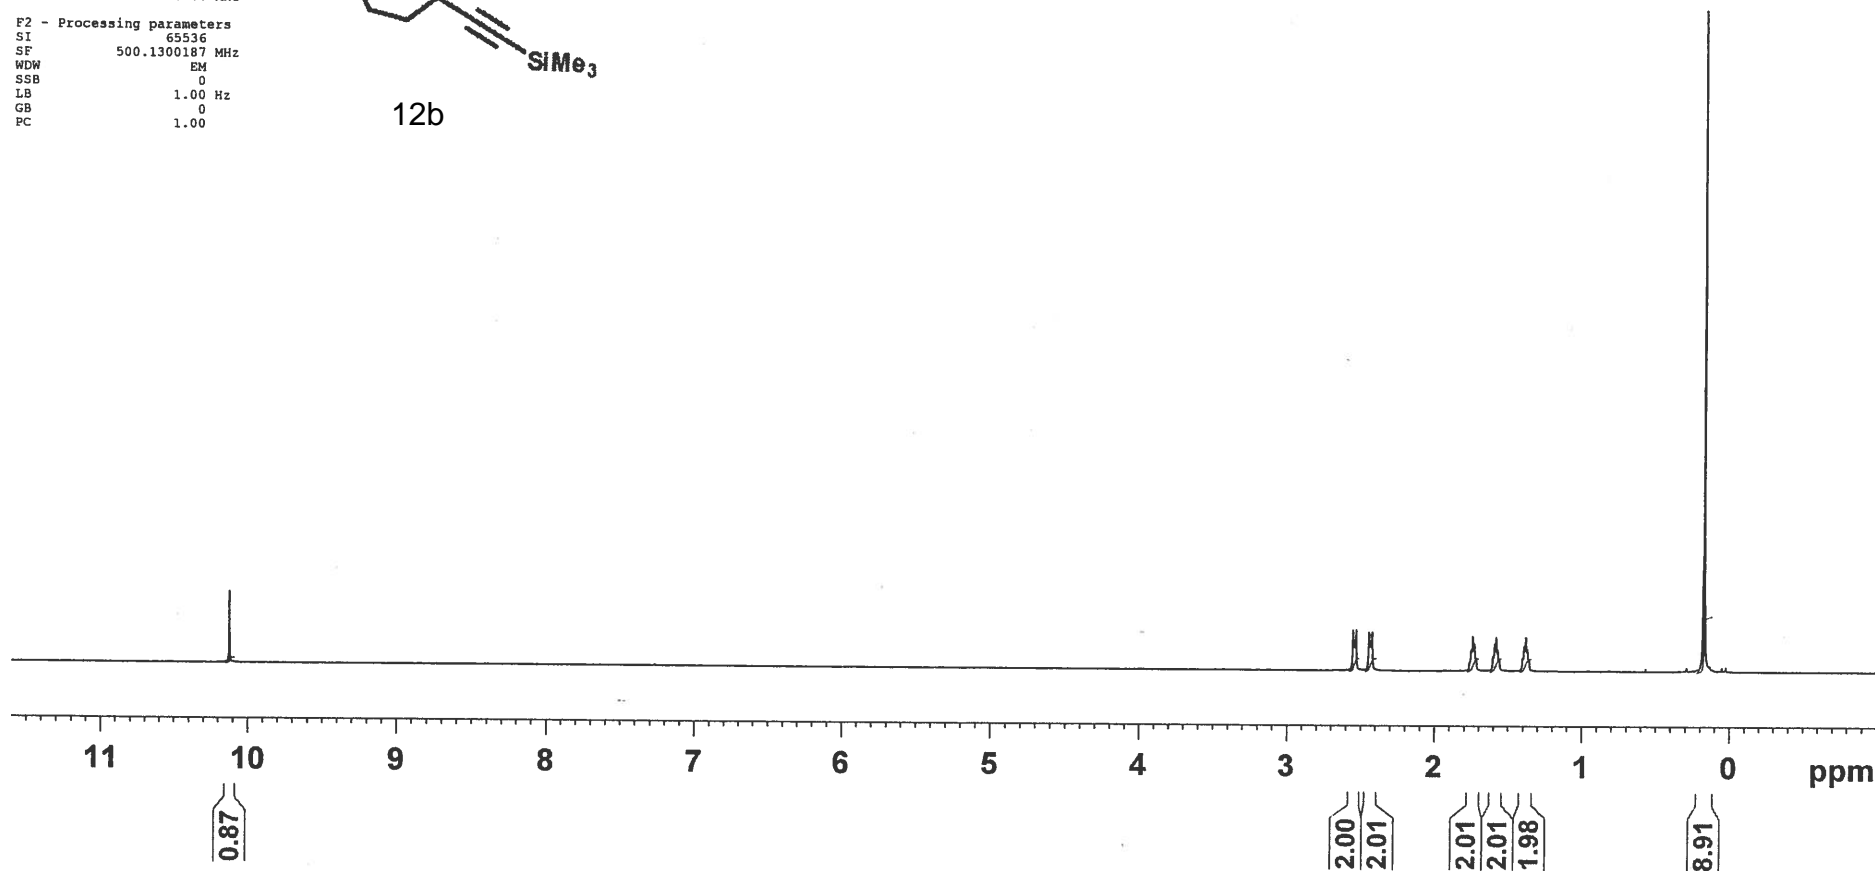

Cycloheptenecarbaldehyde-TMSacetylene-2 13C  
 Experiment 1 Topspin 500  
 Thursday 16 February 2012

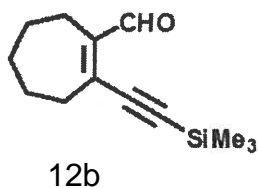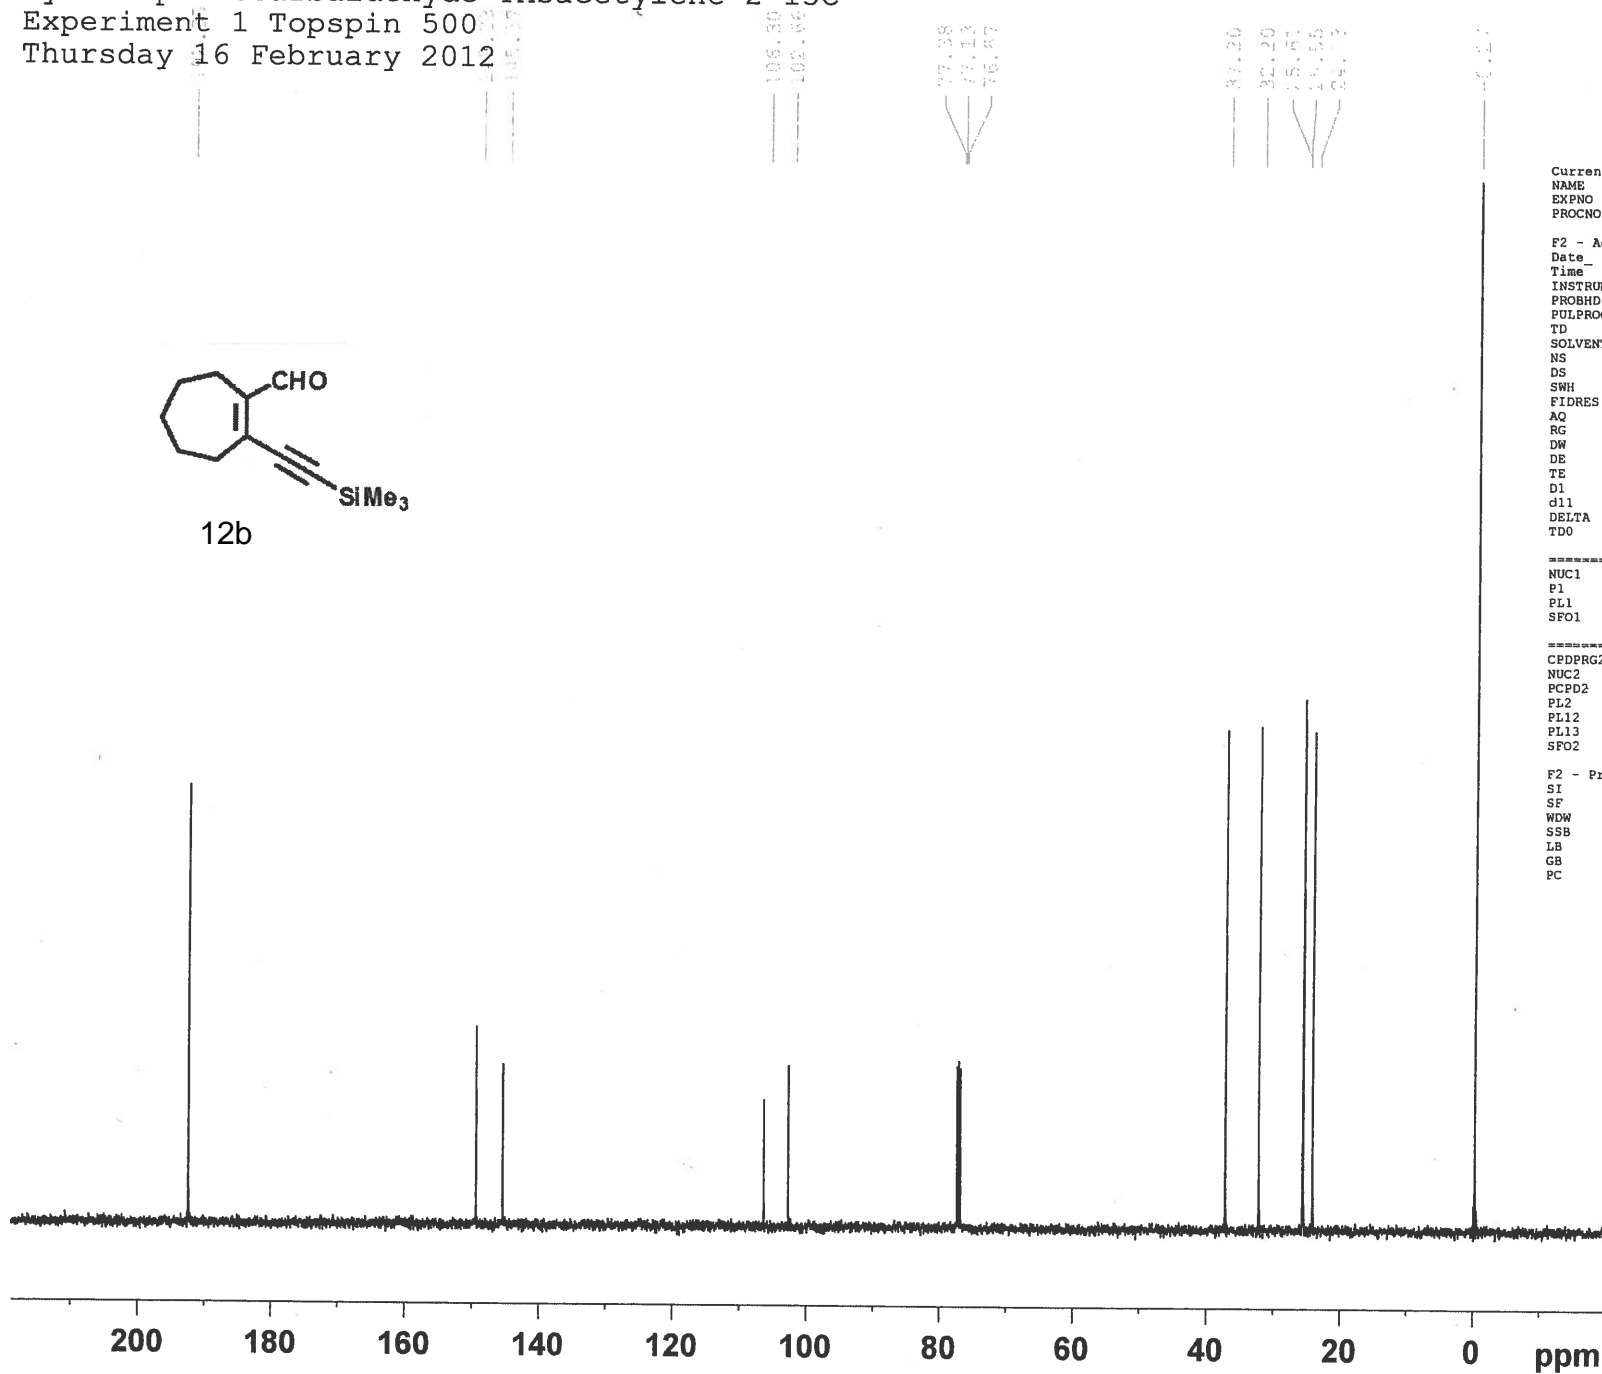

Current Data Parameters  
 NAME Cycloheptenecarbaldehyde-TMSacetylene-2 13C  
 EXPNO 1  
 PROCNO 1

F2 - Acquisition Parameters  
 Date 20120216  
 Time 15.52  
 INSTRUM spect  
 PROBHD 5 mm PABBO BB/  
 PULPROG zgpg30  
 TD 16384  
 SOLVENT CDC13  
 NS 26  
 DS 4  
 SWH 30030.029 Hz  
 FIDRES 1.832888 Hz  
 AQ 0.2728603 sec  
 RG 1625.5  
 DW 16.650 usec  
 DE 6.50 usec  
 TE 294.2 K  
 D1 1.00000000 sec  
 d11 0.03000000 sec  
 DELTA 0.89999998 sec  
 TDO 1

===== CHANNEL f1 =====  
 NUC1 13C  
 P1 9.50 usec  
 PL1 -0.70 dB  
 SFO1 125.7702890 MHz

===== CHANNEL f2 =====  
 CPDPRG2 waltz16  
 NUC2 1H  
 PCPD2 70.00 usec  
 PL2 -1.20 dB  
 PL12 12.30 dB  
 PL13 15.30 dB  
 SFO2 500.1325010 MHz

F2 - Processing parameters  
 SI 32768  
 SF 125.7577890 MHz  
 WDW EM  
 SSB 0  
 LB 2.00 Hz  
 GB 0  
 PC 1.40



CyclohepteneOAc-CC-TMS  
Experiment 2 Topspin 500 3.1  
Tuesday 20 November 2012

Current Data Parameters  
NAME CyclohepteneOAc-CC-TMS  
EXPNO 2  
PROCNO 1

F2 - Acquisition Parameters  
Date\_ 20121120  
Time 12.13  
INSTRUM spect  
PROBHD 5 mm PABBO BB/  
PULPROG zgpg30  
TD 32768  
SOLVENT C6D6  
NS 16  
DS 2  
SWH 11029.412 Hz  
FIDRES 0.336591 Hz  
AQ 1.4854827 sec  
RG 12.73  
DW 45.333 usec  
DE 6.50 usec  
TE 295.5 K  
D1 1.00000000 sec  
D12 0.00002000 sec  
D16 0.00020000 sec  
TD0 1

===== CHANNEL f1 =====  
SFO1 500.133008 MHz  
NUC1 1H  
P1 14.80 usec  
P2 29.60 usec  
P12 2000.00 usec  
PLW0 0 W  
PLW1 12.23400021 W  
SPNAM[1] Squa100.1000  
SPOAL1 0.500  
SPOFFS1 0 Hz  
SPW1 0.00267970 W

===== GRADIENT CHANNEL =====  
GPNAM[1] SMSQ10.100  
GPNAM[2] SMSQ10.100  
GPZ1 31.00 %  
GPZ2 11.00 %  
P16 1000.00 usec

F2 - Processing parameters  
SI 32768  
SF 500.1300000 MHz  
WDW EM  
SSB 0  
LB 0.40 Hz  
GB 0  
PC 1.00

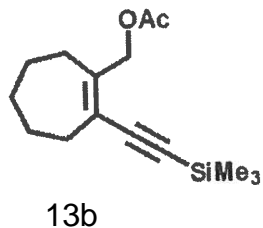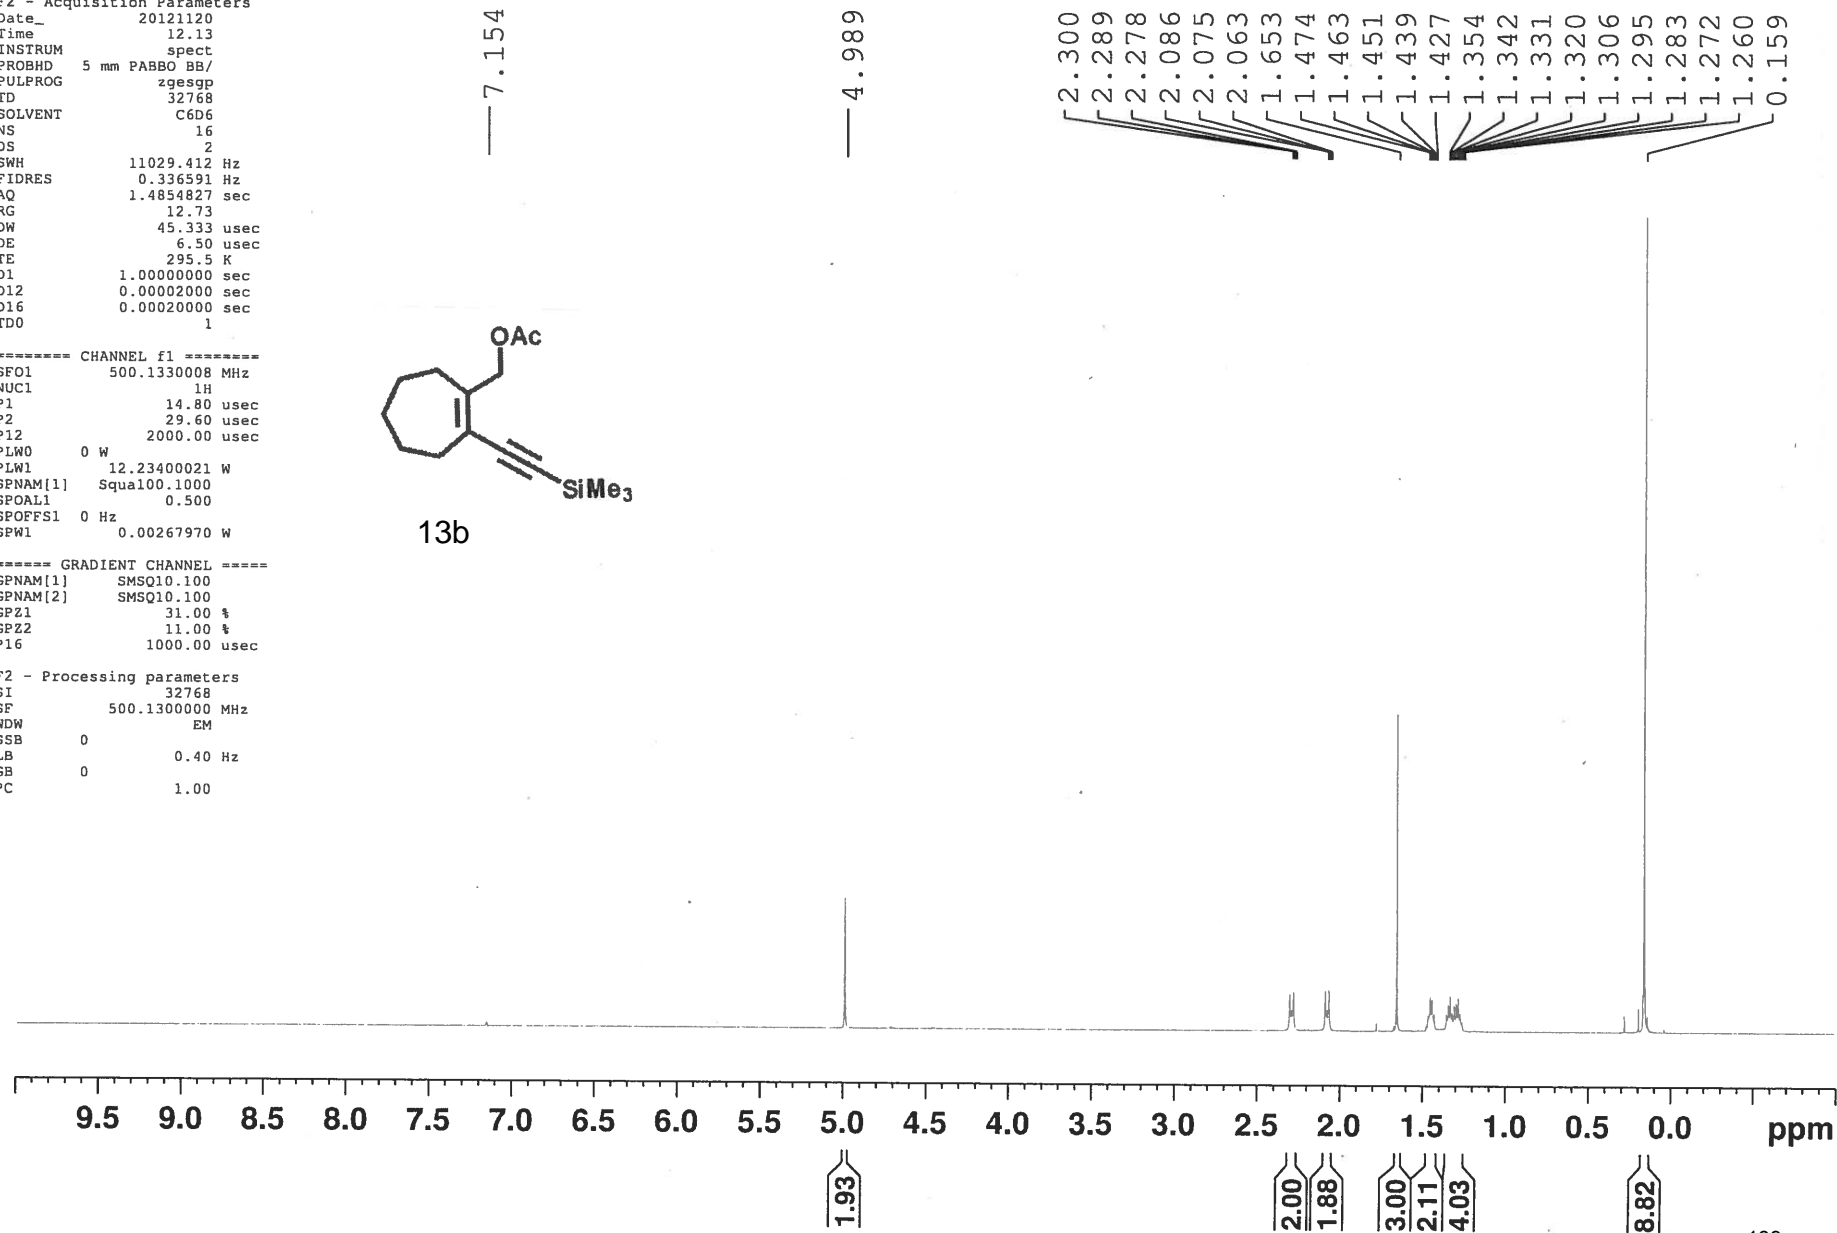

CyclohepteneOAc-CC-TMS 13C  
Experiment 1 Topspin 500 3.1  
Tuesday 20 November 2012

Current Data Parameters  
NAME CyclohepteneOAc-CC-TMS 13C  
EXPNO 2  
PROCNO 1

F2 - Acquisition Parameters  
Date\_ 20121120  
Time 12.25  
INSTRUM spect  
PROBHD 5 mm PABBO BB/  
PULPROG zgpg30  
TD 65536  
SOLVENT C6D6  
NS 5  
DS 4  
SWH 29761.904 Hz  
FIDRES 0.454131 Hz  
AQ 1.1010048 sec  
RG 203.82  
DW 16.800 usec  
DE 6.50 usec  
TE 296.4 K  
D1 2.00000000 sec  
D11 0.03000000 sec  
TD0 1

===== CHANNEL f1 =====  
SFO1 125.7703637 MHz  
NUC1 13C  
P1 9.50 usec  
PLW1 66.48200226 W

===== CHANNEL f2 =====  
SFO2 500.1320005 MHz  
NUC2 1H  
CPDPRG[2] waltz16  
PCPD2 80.00 usec  
PLW2 12.23400021 W  
PLW12 0.41870999 W  
PLW13 0.26797000 W

F2 - Processing parameters  
SI 32768  
SF 125.7577890 MHz  
WDW EM  
SSB 0  
LB 1.00 Hz  
GB 0  
PC 1.40

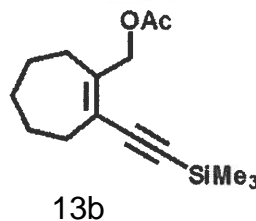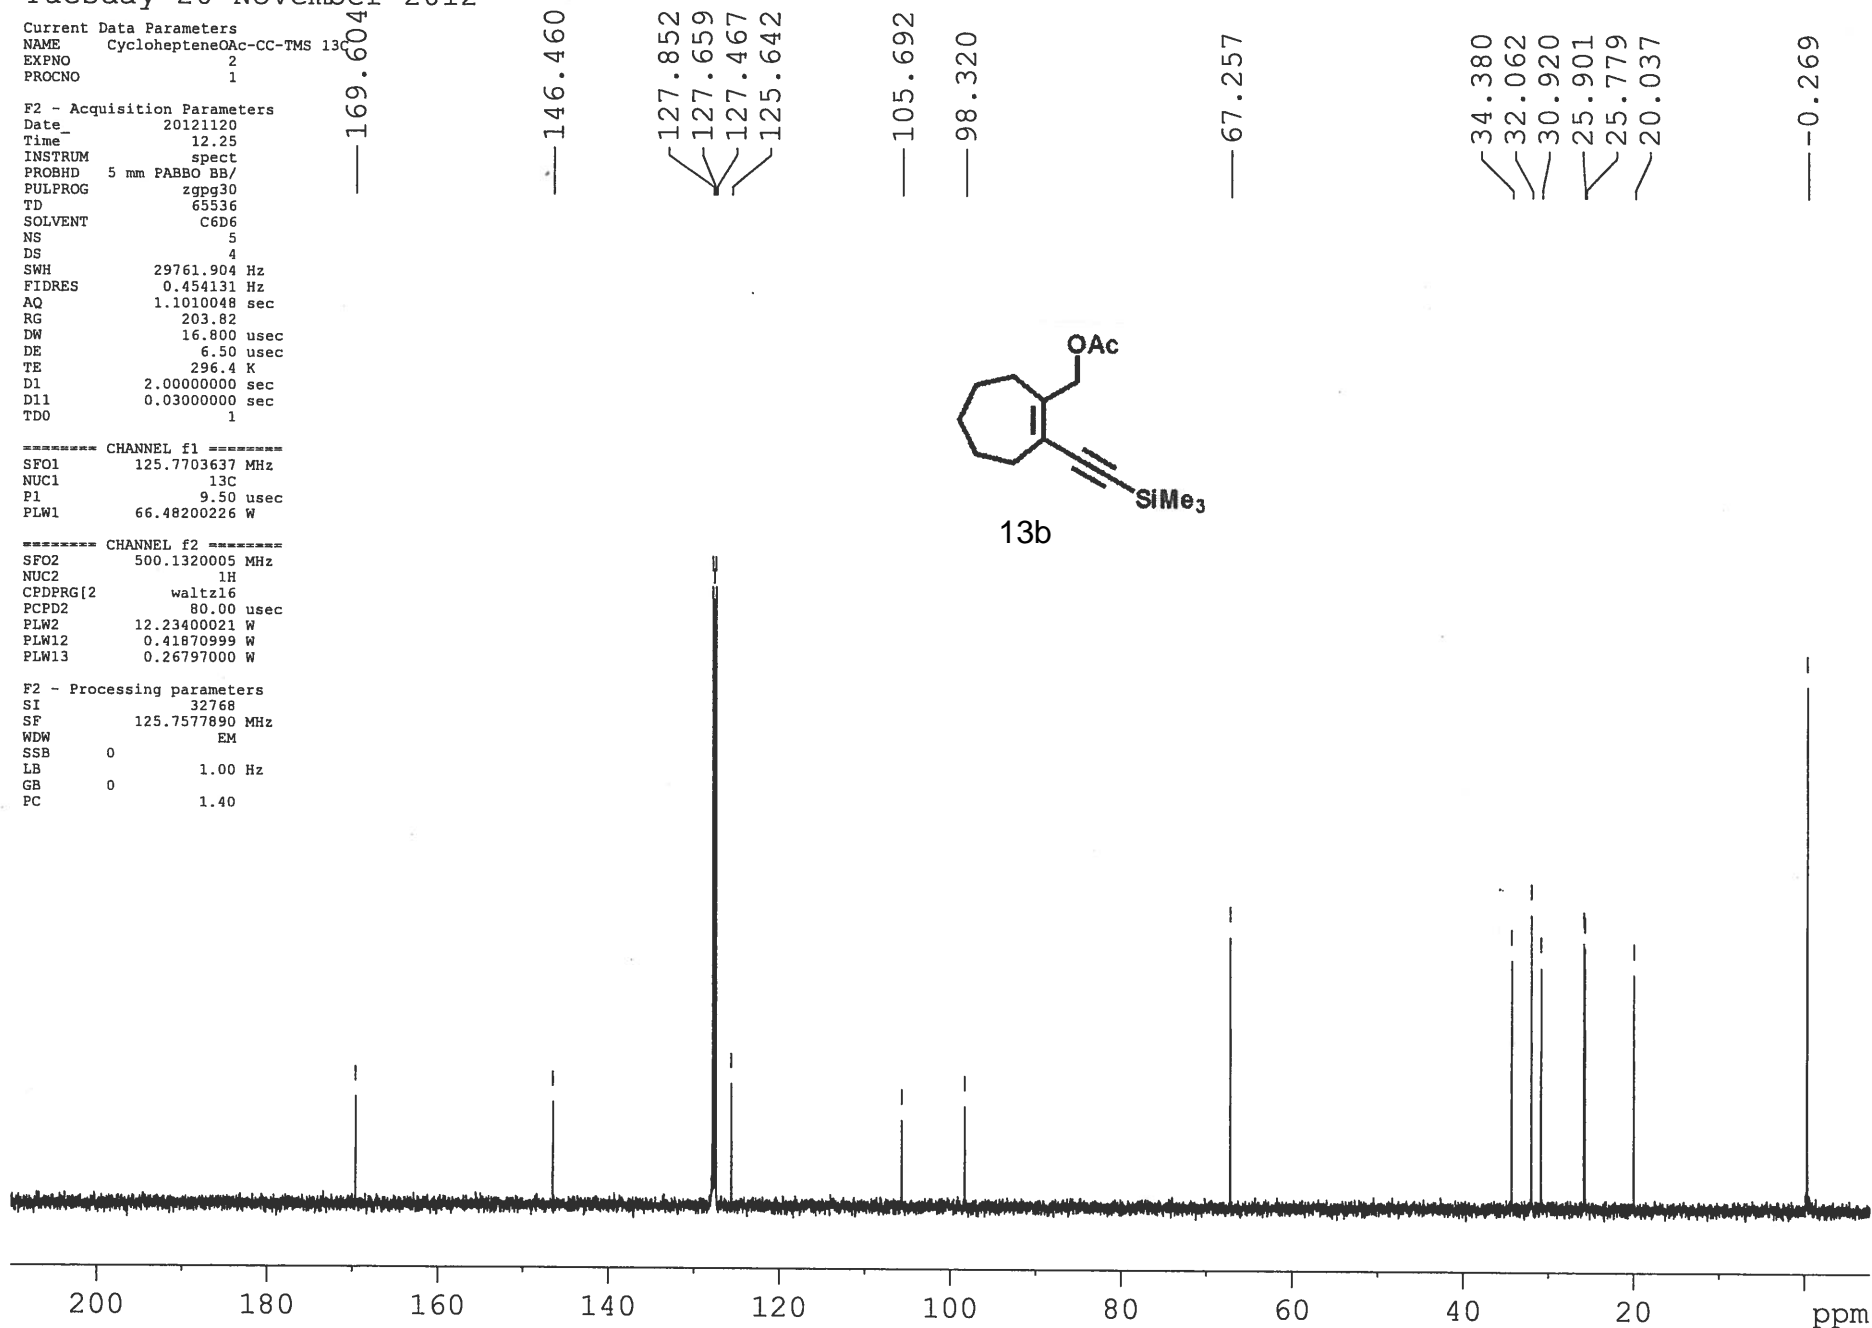

CyclohexeneOAc-CCH  
 Experiment 2 Topspin 500 3.1  
 Thursday 29 November 2012

— 7.153

— 4.836

2.982  
 2.047  
 2.034  
 2.023  
 1.899  
 1.888  
 1.875  
 1.695  
 1.333  
 1.328  
 1.323  
 1.320  
 1.315  
 1.312  
 1.310  
 1.303  
 1.300  
 1.291  
 1.283  
 1.281  
 1.277  
 1.271  
 1.269  
 1.265

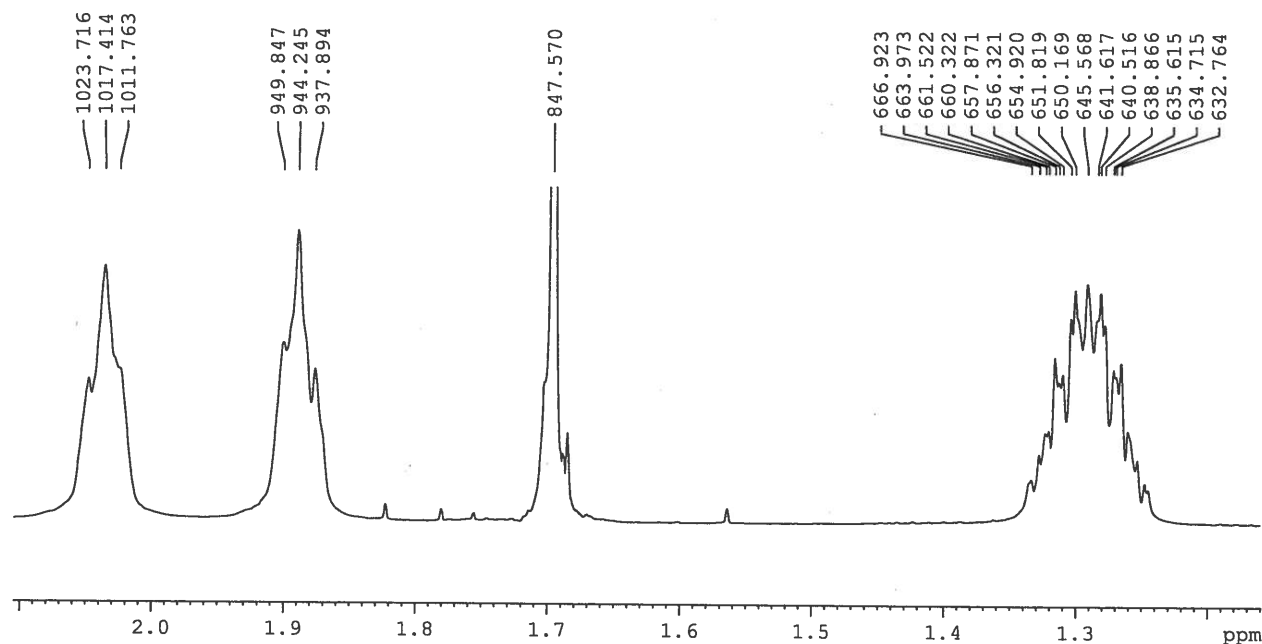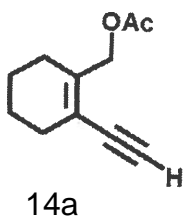

Current Data Parameters  
 NAME CyclohexeneOAc-CCH  
 EXPNO 2  
 PROCNO 1

F2 - Acquisition Parameters  
 Date\_ 20121129  
 Time 15.19  
 INSTRUM spect  
 PROBHD 5 mm PABBO BB/  
 PULPROG zgpg30  
 TD 32768  
 SOLVENT CDCl3  
 NS 16  
 DS 2  
 SWH 11029.412 Hz  
 FIDRES 0.336591 Hz  
 AQ 1.4854827 sec  
 RG 10  
 DW 45.333 usec  
 DE 6.50 usec  
 TE 294.6 K  
 D1 1.00000000 sec  
 D12 0.00002000 sec  
 D16 0.00020000 sec  
 TD0 1

===== CHANNEL f1 =====  
 SFO1 500.1300000 MHz  
 NUC1 1H  
 P1 14.80 usec  
 P2 29.60 usec  
 P12 2000.00 usec  
 PLW0 0 W  
 PLW1 12.23400021 W  
 SPNAM[1] Squal00.1000  
 SPOAL1 0.500  
 SPOFFS1 0 Hz  
 SPW1 0.00267970 W

===== GRADIENT CHANNEL =====  
 GPNAM[1] SMSQ10.100  
 GPNAM[2] SMSQ10.100  
 GP21 31.00 %  
 GP22 11.00 %  
 P16 1000.00 usec

F2 - Processing parameters  
 SI 32768  
 SF 500.1300000 MHz  
 WDW 0  
 SSB 0  
 LB 0 Hz  
 GB 0  
 PC 194.00

cyclohexeneOAc-2-CCH  
 Experiment 1  
 ra 300 Topspin  
 Thursday 29 November 2012

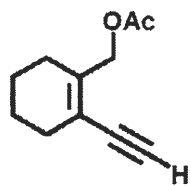

14a

NAME CyclohexeneOAc-2-CCH 13C  
 EXPNO 1  
 PROCNO 1  
 Date\_ 20121129  
 Time\_ 16.33  
 INSTRUM spect  
 PROBHD 5 mm PABBO BB-  
 PULPROG zgpg30  
 TD 16384  
 SOLVENT C6D6  
 NS 16  
 DS 4  
 SWH 17985.611 Hz  
 FIDRES 1.097755 Hz  
 AQ 0.4555252 sec  
 RG 20642.5  
 DW 27.800 usec  
 DE 6.00 usec  
 TE 295.5 K  
 D1 1.00000000 sec  
 D11 0.03000000 sec  
 TD0 1

===== CHANNEL f1 =====  
 NUC1 13C  
 P1 11.25 usec  
 PL1 0.00 dB  
 SFO1 75.4752953 MHz

===== CHANNEL f2 =====  
 CPDPRG2 waltz16  
 NUC2 1H  
 PCPD2 80.00 usec  
 PL2 0.00 dB  
 PL12 16.55 dB  
 PL13 24.00 dB  
 SFO2 300.1312005 MHz  
 SI 8192  
 SF 75.4677423 MHz  
 WDW EM  
 SSB 0  
 LB 2.50 Hz  
 GB 0  
 PC 1.40

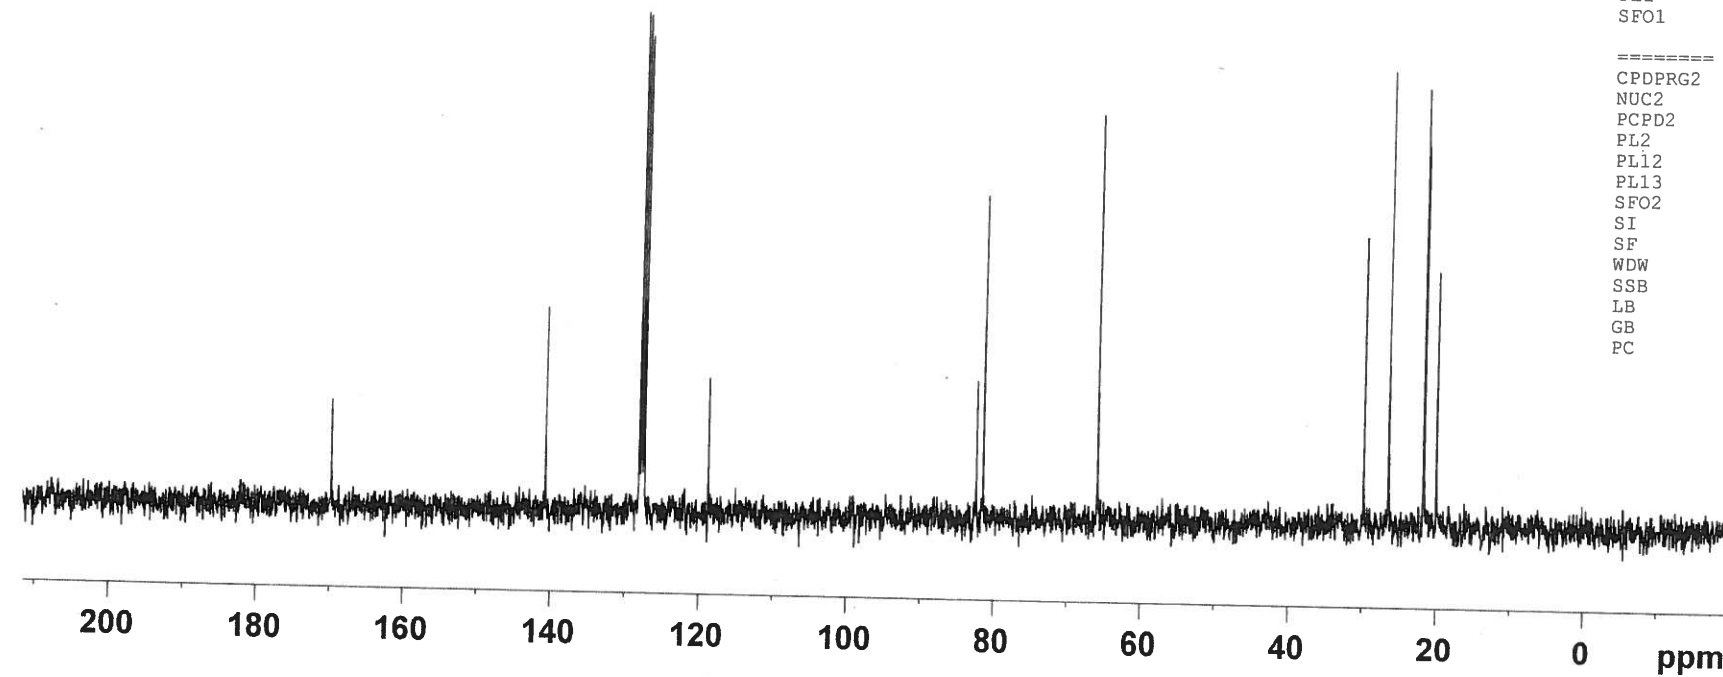

CyclohepteneOAc-CCH  
 Experiment 1  
 Topspin 500 3.1  
 Wednesday 28 November 2012  
 Current Data Parameters  
 NAME CyclohepteneOAc-CCH  
 EXPNO 1  
 PROCNO 1

F2 - Acquisition Parameters  
 Date\_ 20121128  
 Time 15.27  
 INSTRUM spect  
 PROBHD 5 mm PABBO BB/  
 PULPROG zg30  
 TD 65536  
 SOLVENT C6D6  
 NS 8  
 DS 2  
 SWH 10000.000 Hz  
 FIDRES 0.152588 Hz  
 AQ 3.2767999 sec  
 RG 27.82  
 DW 50.000 usec  
 DE 6.50 usec  
 TE 294.2 K  
 D1 1.00000000 sec  
 TD0 1

===== CHANNEL f1 =====  
 SFO1 500.1330885 MHz  
 NUC1 1H  
 P1 14.80 usec  
 PLW1 12.23400021 W

F2 - Processing parameters  
 SI 65536  
 SF 500.1299981 MHz  
 WDW EM  
 SSB 0  
 LB 0.50 Hz  
 GB 0  
 PC 1.00

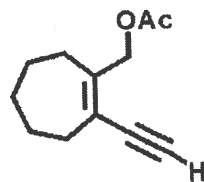

14b

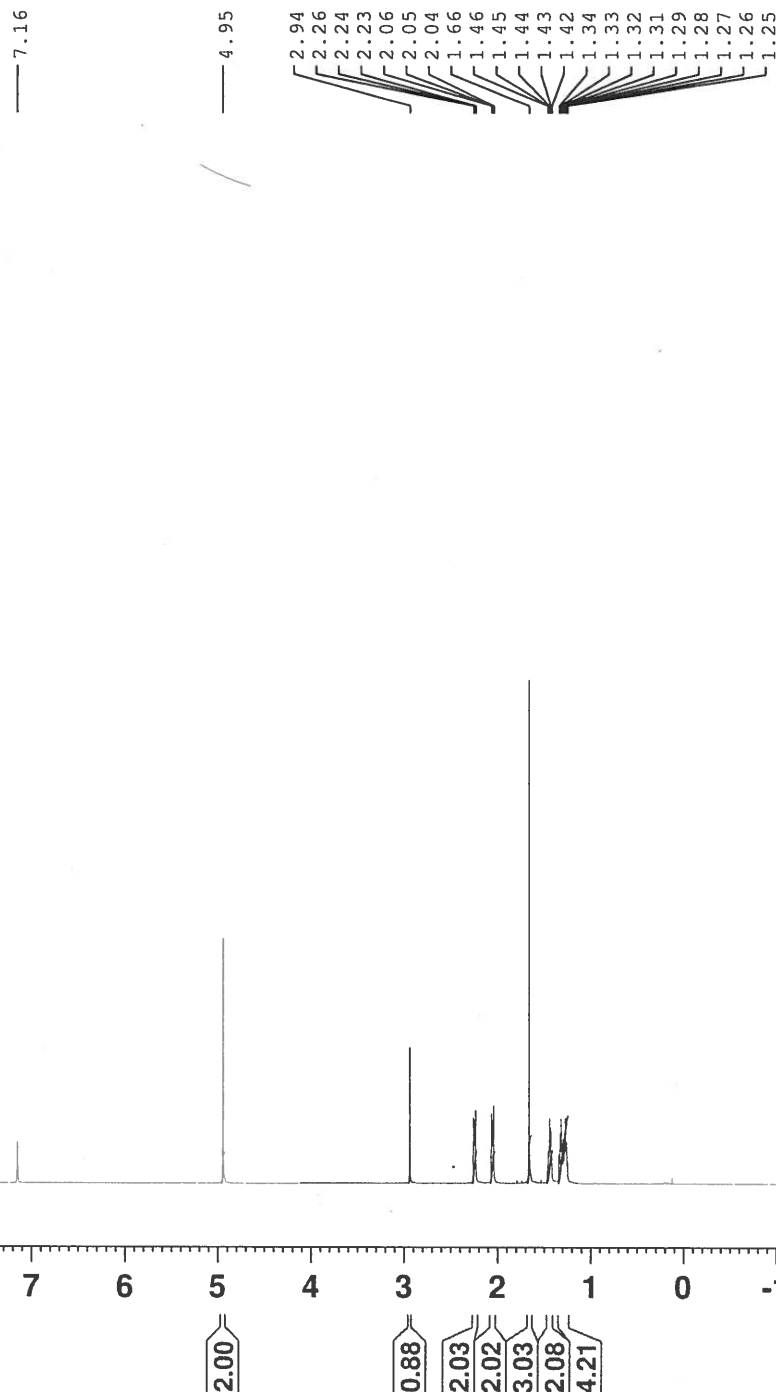

CyclohepteneOAc-CCH 13C  
 Experiment 1  
 Topspin 500 3.1  
 Wednesday 28 November 2012

Current Data Parameters  
 NAME CyclohepteneOAc-CCH 13C  
 EXPNO 1  
 PROCNO 1

F2 - Acquisition Parameters  
 Date\_ 20121128  
 Time 15.31  
 INSTRUM spect  
 PROBHD 5 mm PABBO BB/  
 PULPROG zgpg30  
 TD 65536  
 SOLVENT C6D6  
 NS 10  
 DS 4  
 SWH 29761.904 Hz  
 FIDRES 0.454131 Hz  
 AQ 1.1010048 sec  
 RG 203.82  
 DW 16.800 usec  
 DE 6.50 usec  
 TE 294.4 K  
 D1 2.00000000 sec  
 D11 0.03000000 sec  
 TD0 1

===== CHANNEL f1 =====  
 SFO1 125.7703637 MHz  
 NUC1 13C  
 P1 9.50 usec  
 PLW1 66.48200226 W

===== CHANNEL f2 =====  
 SFO2 500.1320005 MHz  
 NUC2 1H  
 CPDPRG[2] waltz16  
 PCPD2 80.00 usec  
 PLW2 12.23400021 W  
 PLW12 0.41870999 W  
 PLW13 0.26797000 W

F2 - Processing parameters  
 SI 32768  
 SF 125.7577890 MHz  
 WDW EM  
 SSB 0  
 LB 1.00 Hz  
 GB 0  
 PC 1.40

— 169.763

— 146.666

127.980  
 127.882  
 127.689  
 127.497  
 124.716

83.666  
 81.989

— 67.235

34.356  
 32.012  
 30.771  
 25.779  
 25.684  
 20.046

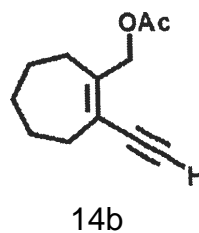

200 180 160 140 120 100 80 60 40 20 ppm

# Cyclohexenecarbaldehyde-2-SonogashiraOAc

Experiment 1

Topspin 500

Tuesday 07 February 2012

Current Data Parameters

NAME Cyclohexenecarbaldehyde-2-SonogashiraOAc

EXPNO 1

PROCNO 1

F2 - Acquisition Parameters

Date\_ 20120207

Time 14.20

INSTRUM spect

PROBHD 5 mm PABBO BB/

PULPROG zg

TD 65536

SOLVENT MeOD

NS 8

DS 2

SWH 10330.578 Hz

FIDRES 0.157632 Hz

AQ 3.171923 sec

RG 12.7

DW 48.400 usec

DE 6.50 usec

TE 293.2 K

D1 1.00000000 sec

TD0 1

===== CHANNEL f1 =====

NUC1 1H

P1 10.00 usec

PL1 0.00 dB

SFO1 500.1330880 MHz

F2 - Processing parameters

SI 65536

SF 500.1300196 MHz

WDW EM

SSB 0

LB 0.40 Hz

GB 0

PC 1.00

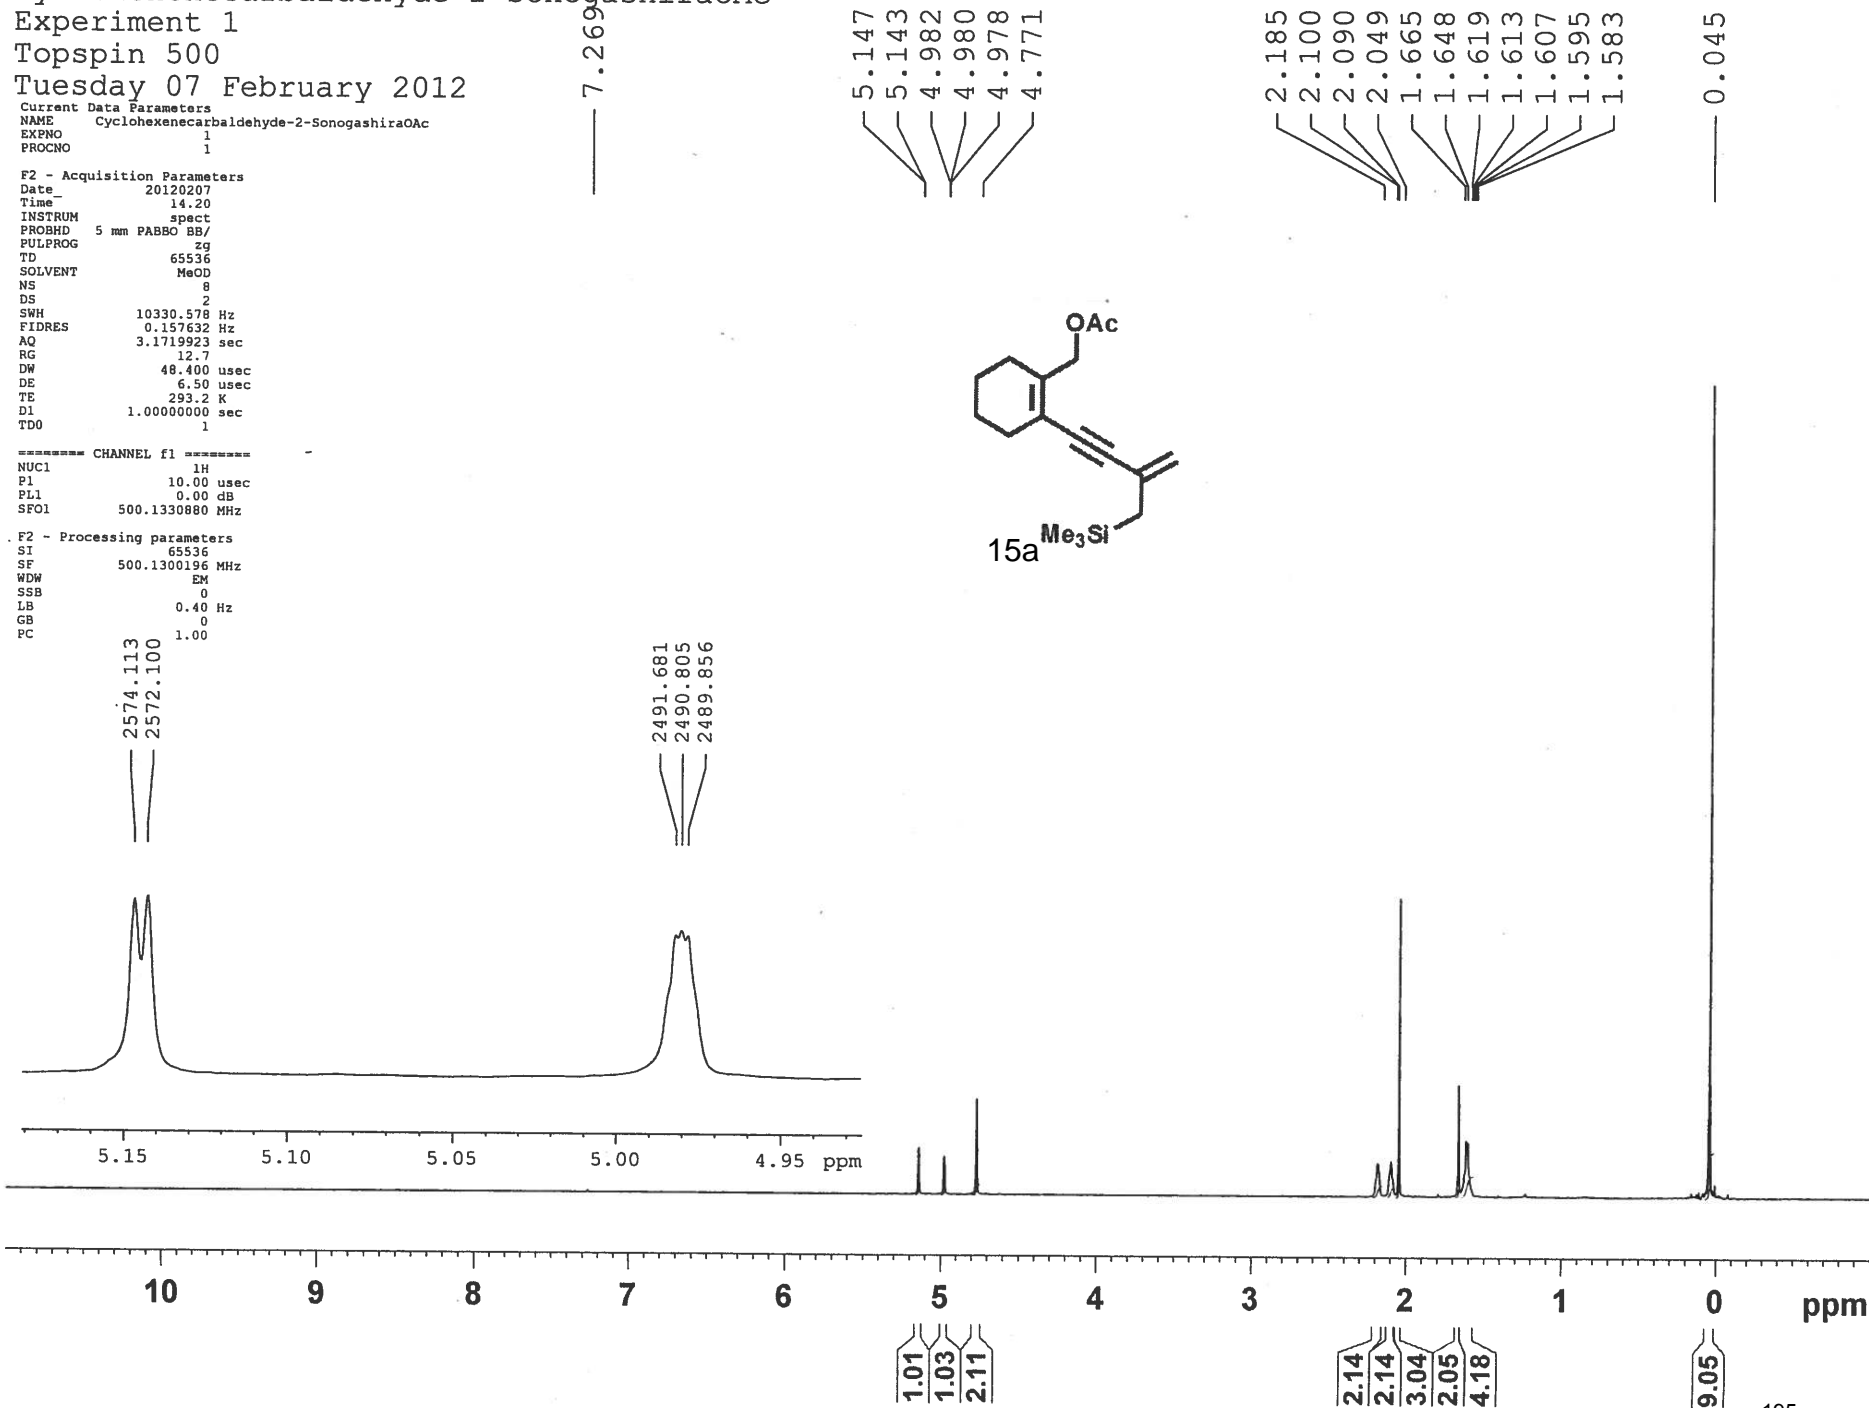

Cyclohexenecarbaldehyde-2-SonogashiraOAc 13C

Experiment 1

Topspin 500

Tuesday 07 February 2012

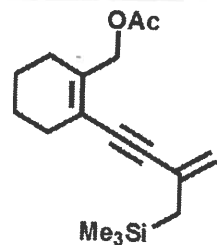

15a

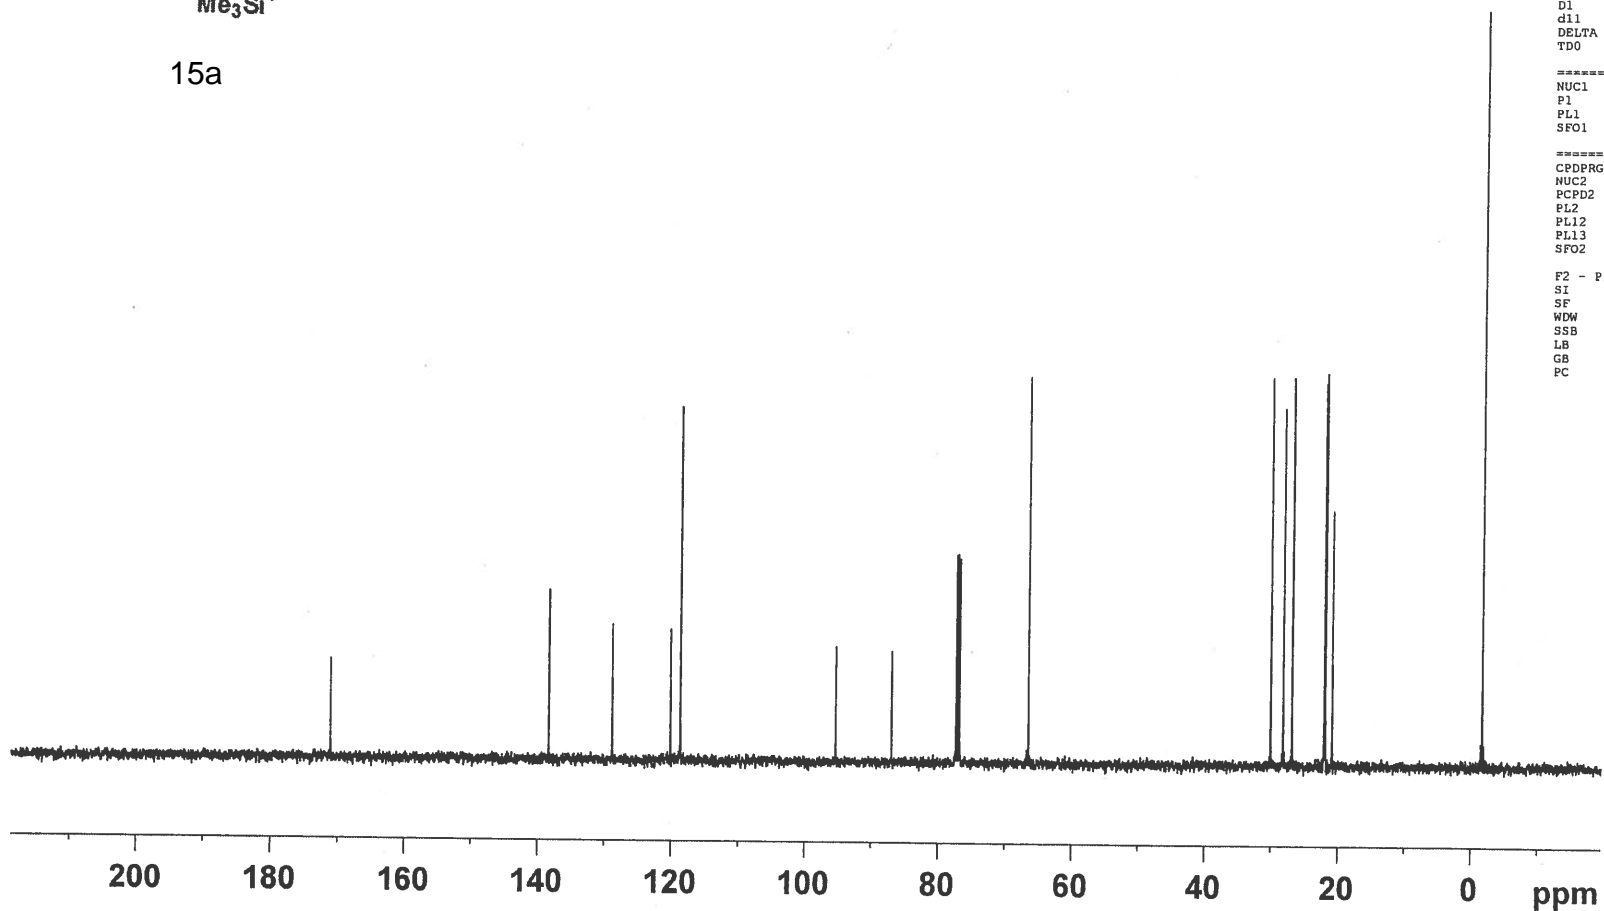

Current Data Parameters  
NAME Cyclohexenecarbaldehyde-2-SonogashiraOAc 13C  
EXPNO 1  
PROCNO 1

F2 - Acquisition Parameters  
Date\_ 20120207  
Time 14.25  
INSTRUM spect  
PROBHD 5 mm PABBO BB/  
PULPROG zgpg30  
TD 16384  
SOLVENT CDCl3  
NS 47  
DS 4  
SWH 30030.029 Hz  
FIDRES 1.832888 Hz  
AQ 0.2728603 sec  
RG 2580.3  
DW 16.650 usec  
DE 6.50 usec  
TE 294.2 K  
D1 1.00000000 sec  
d11 0.03000000 sec  
DELTA 0.89999998 sec  
TDO 1

===== CHANNEL f1 =====  
NUC1 13C  
P1 9.50 usec  
PL1 -0.70 dB  
SFO1 125.7702890 MHz

===== CHANNEL f2 =====  
CPDPRG2 waltz16  
NUC2 1H  
PCPD2 70.00 usec  
PL2 -1.20 dB  
PL12 12.30 dB  
PL13 15.30 dB  
SFO2 500.1325010 MHz

F2 - Processing parameters  
SI 32768  
SF 125.7577890 MHz  
WDW EM  
SSB 0  
LB 2.00 Hz  
GB 0  
PC 1.40



CyclohepteneOAc-CC-PropeneTMS  
 Experiment 1 Topspin 500 3.1  
 Wednesday 28 November 2012

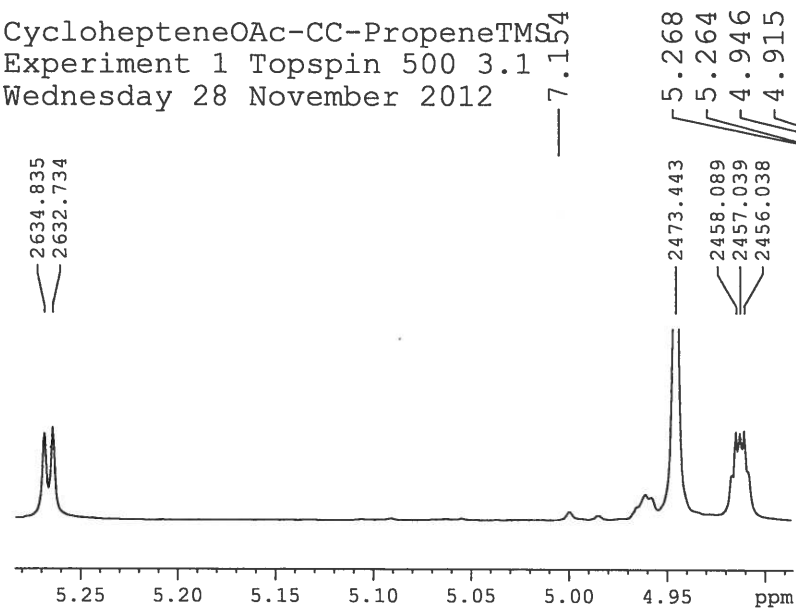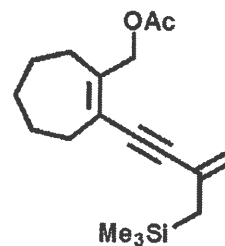

15b

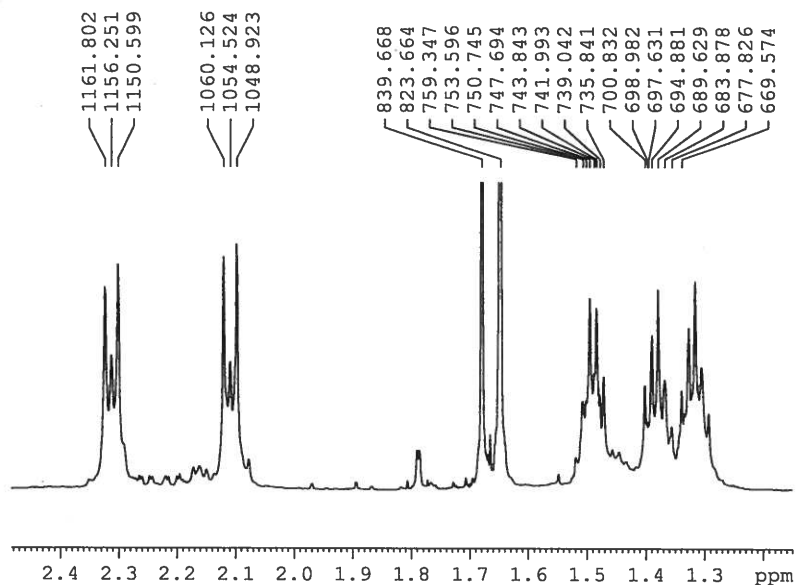

Current Data Parameters  
 NAME CyclohepteneOAc-CC-PropeneTMS  
 EXPNO 1  
 PROCNO 1

F2 - Acquisition Parameters  
 Date\_ 20121128  
 Time\_ 15.02  
 INSTRUM spect  
 PROBHD 5 mm PABBO BB/  
 PULPROG zgpg30  
 TD 32768  
 SOLVENT C6D6  
 NS 16  
 DS 2  
 SWH 11029.412 Hz  
 FIDRES 0.336591 Hz  
 AQ 1.4854827 sec  
 RG 11.5  
 DW 45.333 usec  
 DE 6.50 usec  
 TE 294.2 K  
 D1 1.00000000 sec  
 D12 0.00002000 sec  
 D16 0.00020000 sec  
 TDO 1

===== CHANNEL f1 =====  
 SFO1 500.1329258 MHz  
 NUC1 1H  
 P1 14.80 usec  
 P2 29.60 usec  
 P12 2000.00 usec  
 PLW0 0 W  
 PLW1 12.23400021 W  
 SPNAM[1] Squa100.1000  
 SPOAL1 0.500  
 SPOFFS1 0 Hz  
 SPW1 0.00267970 W

===== GRADIENT CHANNEL =====  
 GPNAM[1] SMSQ10.100  
 GPNAM[2] SMSQ10.100  
 GPZ1 31.00 %  
 GPZ2 11.00 %  
 P16 1000.00 usec

F2 - Processing parameters  
 SI 32768  
 SF 500.1300000 MHz  
 WDW no  
 SSB 0  
 LB 0 Hz  
 GB 0  
 PC 1.00

cycloheptene-2-CC-buteneTMS 13C  
opspin 300 Ultra  
periment 2  
uesday 11 December 2012

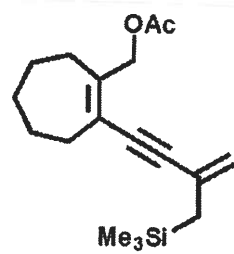

15b

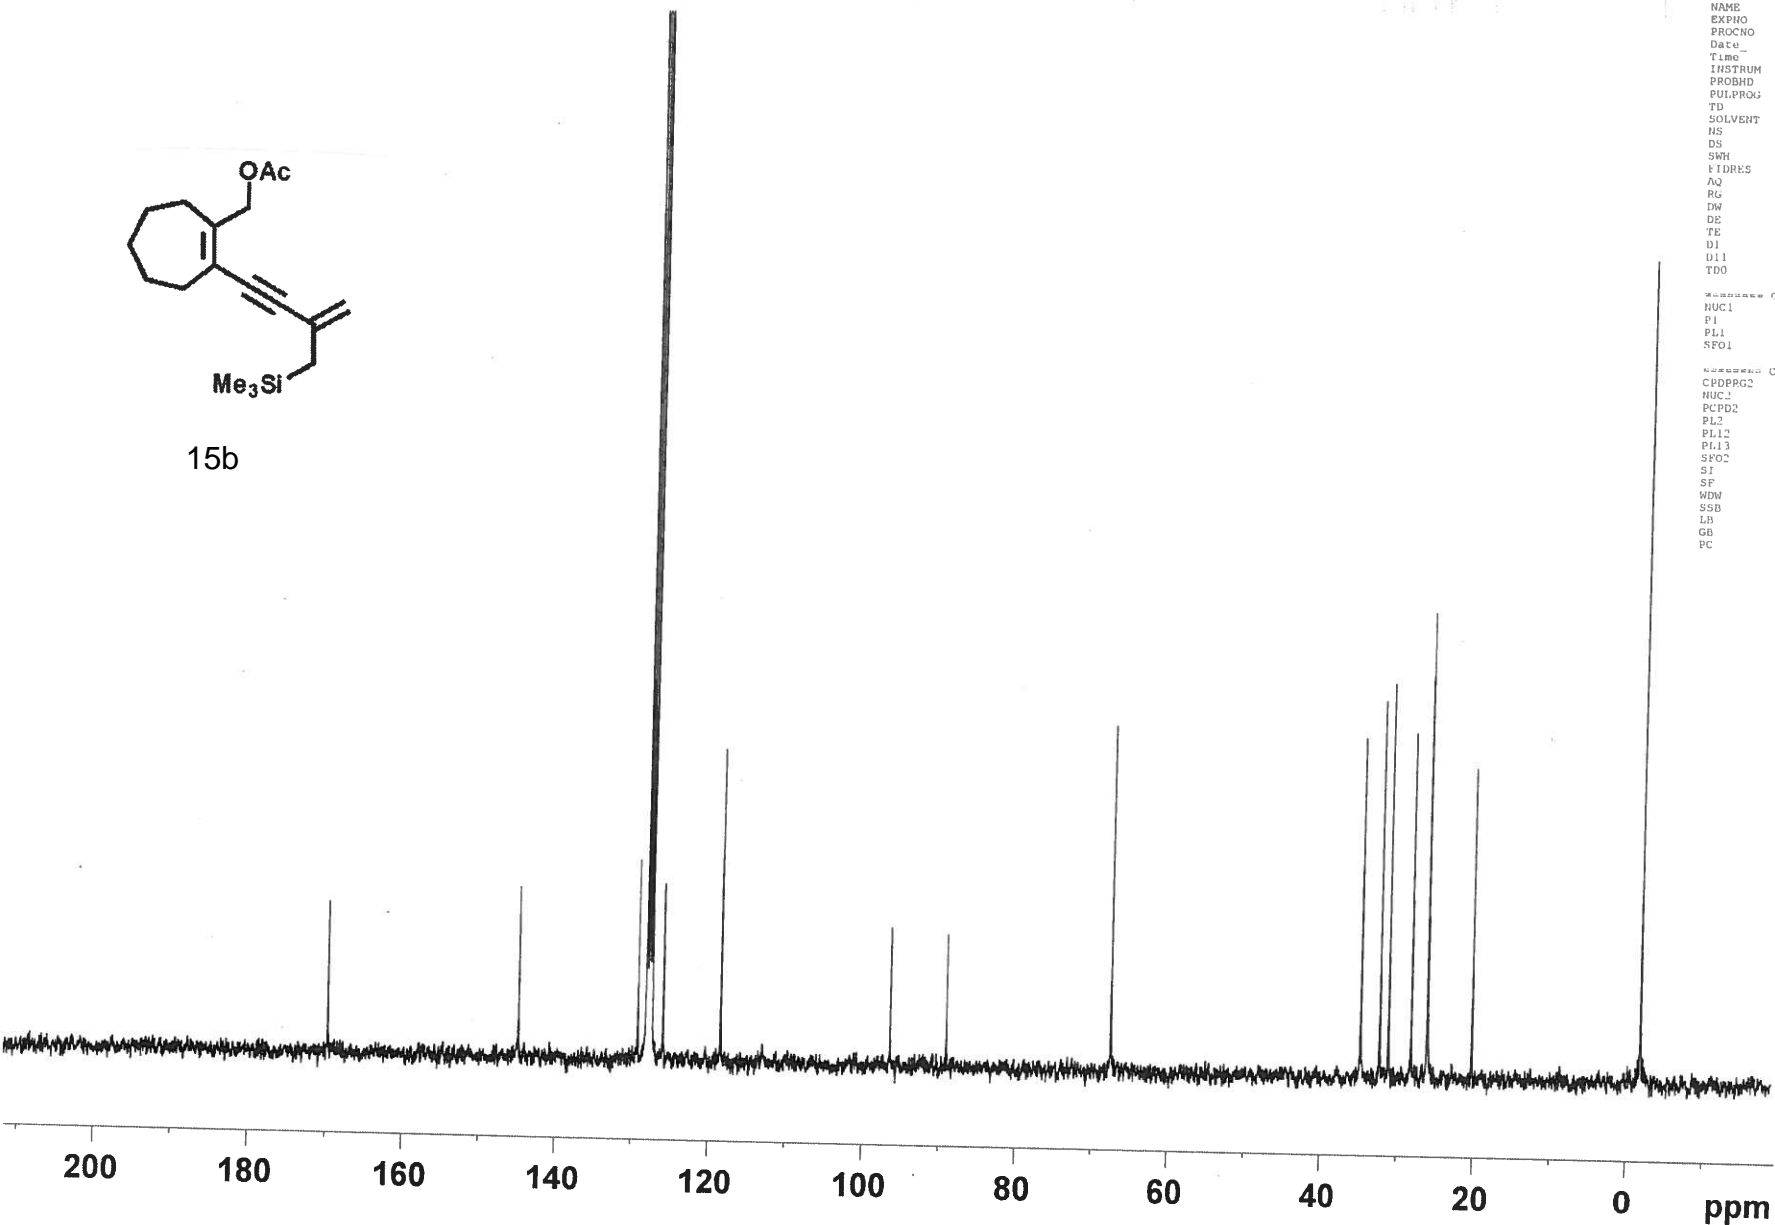

NAME Cycloheptene-2-CC-buteneTMS 13C  
EXPNO 2  
PROCNO 1  
Date\_ 20121211  
Time 11.51  
INSTRUM spect  
PROBHD 5 mm PABBO BB-  
PULPROG zgpg30  
TD 16384  
SOLVENT c5d6  
NS 126  
DS 4  
SWH 17995.611 Hz  
FIDRES 1.097755 Hz  
AQ 0.4555255 sec  
RG 20642.5  
DM 27.800 usec  
DE 6.00 usec  
TE 294.9 K  
D1 1.0000000 sec  
D11 0.2000000 sec  
TD0 1  
  
===== CHANNEL f1 =====  
NUC1 13C  
P1 11.25 usec  
PL1 0.00 dB  
SFO1 75.4752953 MHz  
  
===== CHANNEL f2 =====  
CPDPPG2 waltz16  
NUC2 1H  
PCPD2 90.00 usec  
PL2 0.00 dB  
PL12 16.55 dB  
PL13 24.00 dB  
SFO2 300.1312005 MHz  
SI 0192  
SF 75.4677423 MHz  
WDM EM  
SSB 0  
LB 2.50 Hz  
GB 0  
PC 1.40

CyclohexeneOAc-CC-PropeneTMS-Co2 (CO) 6  
Experiment 2 Topspin 500 3.1.16  
Wednesday 23 January 2013 -7

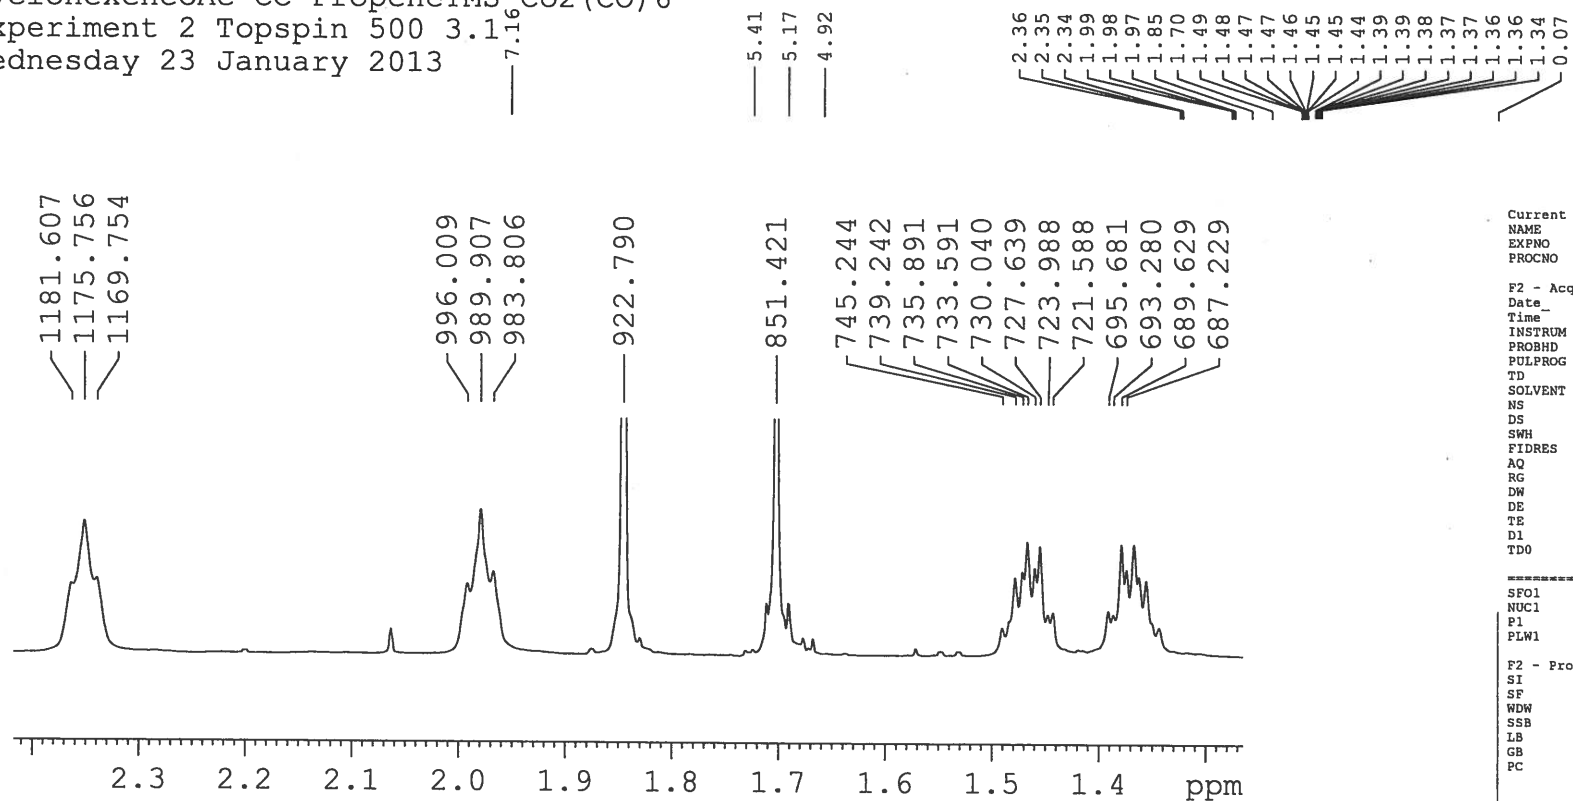

```
Current Data Parameters
NAME      CyclohexeneOAc-CC-PropeneTMS-Co2 (CO) 6
EXPNO     2
PROCNO    1
```

```

F2 - Acquisition Parameters
-----
Date_                20130123
Time_                15.11
INSTRUM              spect
PROBHD              5 mm PABBO BB/
PULPROG              zg30
TD                  65536
SOLVENT              CDCl3
NS                   8
DS                   2
SWH                 10000.000 Hz
FIDRES              0.152588
AQ                  3.2767999 sec
RG                  463.934
DE                   50.000 usec
TE                   6.50
TD0                  291.4
D1                   1.00000000 sec
D10                  1

```

```

***** CHANNEL f1 *****
SFO1      500.1330885 MHz
NUC1              1H
P1              14.80 usec
PLW1      12.23400021 W

```

```
F2 - Processing parameters
SI                      65536
SF                      500.1299981 MHz
WDW                      no
SSB                      0
LB                      0 Hz
GB                      0
PC                      1.00
```

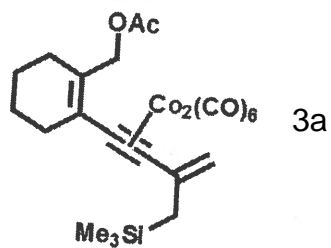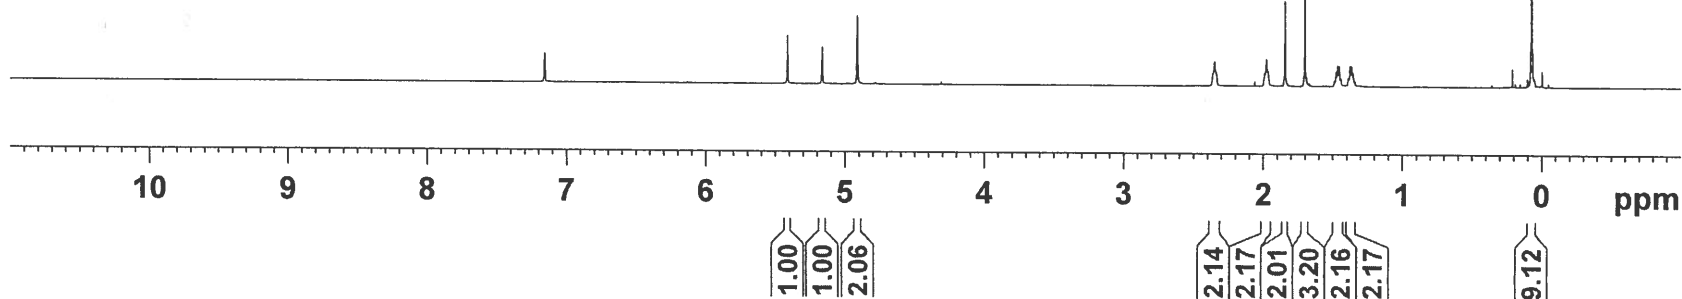

CyclohexeneOAc-2-CC-buteneTMS Co<sub>2</sub>(CO)<sub>6</sub> 13C  
 Topspin 300  
 Experiment 2  
 Wednesday 23 January 2013

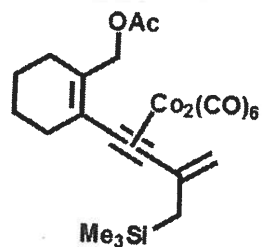

3a

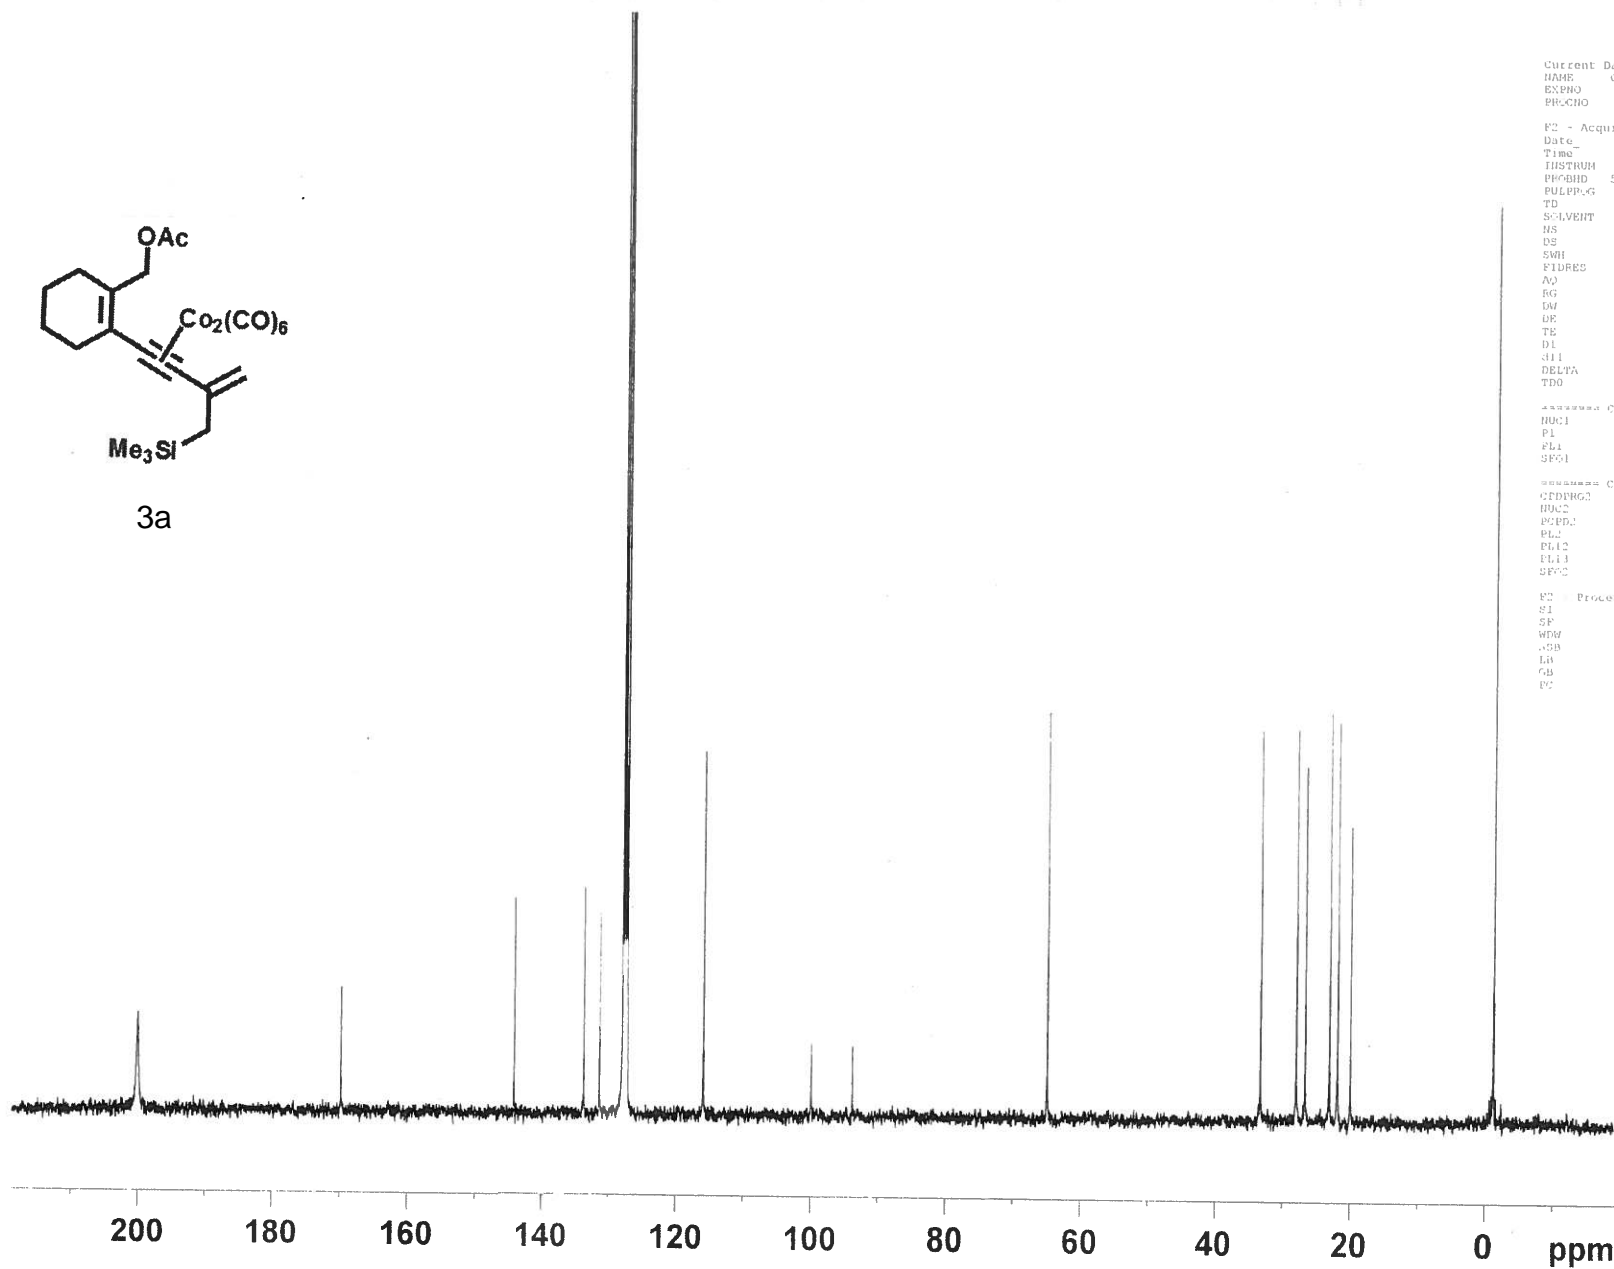

Current Data Parameters  
 NAME CyclohexeneOAc-2-CC-buteneTMS Co<sub>2</sub>(CO)<sub>6</sub> 13C  
 EXPNO 2  
 PROCNO 1

F2 - Acquisition Parameters  
 Date\_ 20130123  
 Time 14.21  
 INSTRUM spect  
 P1 5.000000  
 PULPROG zgpg30  
 TD 65536  
 SOLVENT dms  
 NS 4096  
 DS 4  
 SWH 17983.1244  
 FIDRES 0.14999944  
 AQ 0.11699444  
 RG 327.68  
 DM 0.000000  
 DE 0.000000  
 TE 300.2  
 D1 1.20000000  
 S11 0.00000000  
 DELTA 1.12000000  
 TDO 0

\*\*\*\*\* CHANNEL f1 \*\*\*\*\*  
 NUC1 13C  
 P1 14.000000  
 PL1 0.000000  
 SFO1 125.760440000

\*\*\*\*\* CHANNEL f2 \*\*\*\*\*  
 CDDPRG2 gddprg2  
 NUC2 13C  
 P2 14.000000  
 PL2 0.000000  
 PL12 0.000000  
 PL13 0.000000  
 SFO2 125.760440000

F2 - Processing parameters  
 SI 32768  
 SF 125.760440000  
 WDW EM  
 GB 0  
 PC 1

Cycloheptenecarbaldehyde-2-SonogashiraOAc  
 Experiment 2 Topspin 500  
 Thursday 08 March 2012

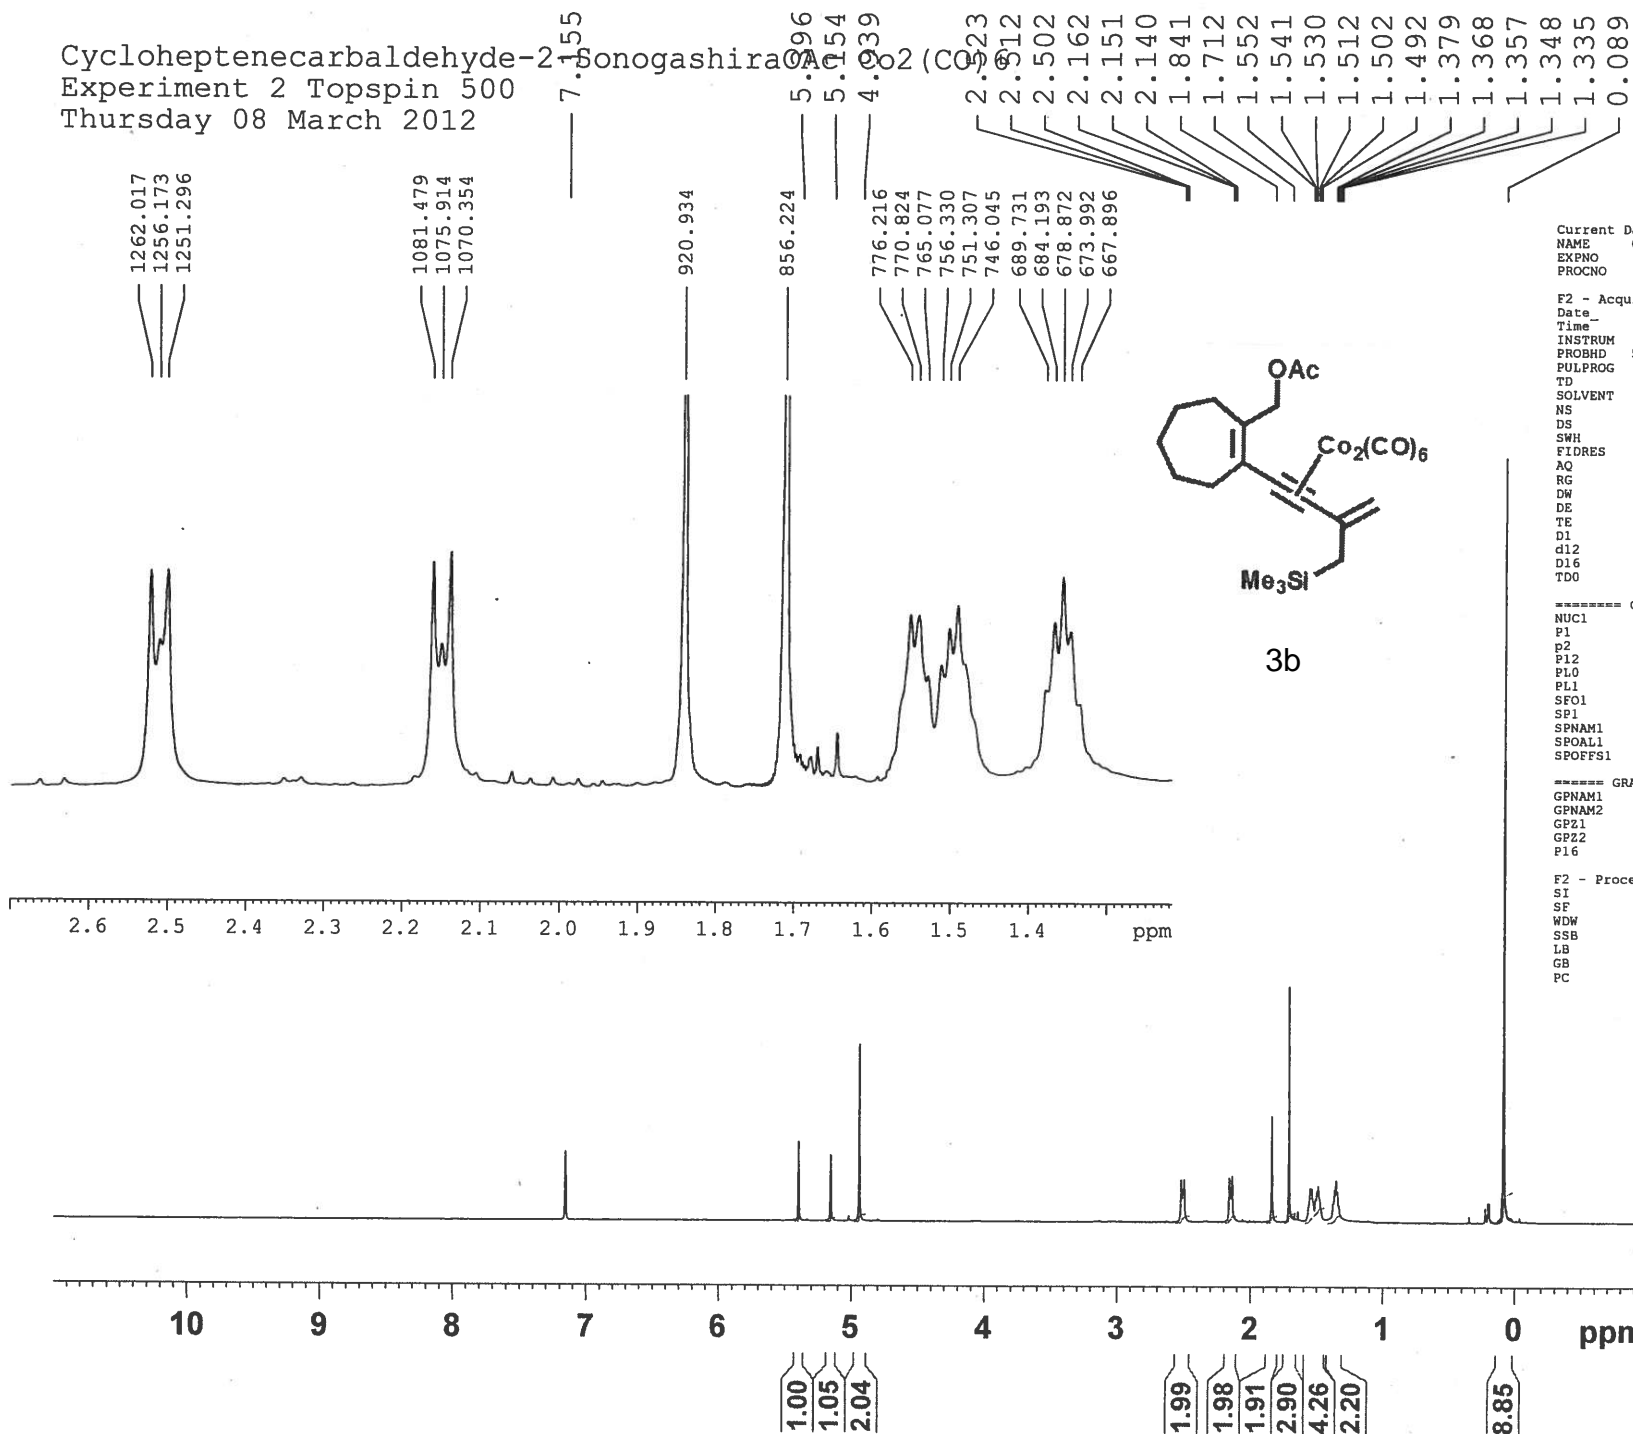

Current Data Parameters  
 NAME Cycloheptenecarbaldehyde-2-SonogashiraOAc Co2(CO)  
 EXPNO 2  
 PROCNO 1

F2 - Acquisition Parameters  
 Date\_ 20120308  
 Time 14.14  
 INSTRUM spect  
 PROBHD 5 mm PABBO BB/  
 PULPROG zgpg30  
 TD 32768  
 SOLVENT CDCl3  
 NS 8  
 DS 2  
 SWH 10964.912 Hz  
 FIDRES 0.334623 Hz  
 AQ 1.4943165 sec  
 RG 50.8  
 DW 45.600 usec  
 DE 6.50 usec  
 TE 296.2 K  
 d1 2.00000000 sec  
 d12 0.00020000 sec  
 d16 0.00020000 sec  
 TDO 1

===== CHANNEL f1 =====  
 NUC1 <sup>1</sup>H  
 P1 14.80 usec  
 p2 29.60 usec  
 P12 2000.00 usec  
 PL0 120.00 dB  
 PL1 -1.40 dB  
 SFO1 500.1303251 MHz  
 SP1 35.19 dB  
 SPNAM1 Squal100.1000  
 SFOAL1 0.500  
 SFOFFS1 0.00 Hz

===== GRADIENT CHANNEL =====  
 GPNAM1 SINE.100  
 GPNAM2 SINE.100  
 GPZ1 31.00 s  
 GPZ2 11.00 s  
 P16 1000.00 usec

F2 - Processing parameters  
 SI 32768  
 SF 500.1300000 MHz  
 WDW EM  
 SSB 0  
 LB 1.00 Hz  
 GB 0  
 PC 1.00

cyclohepteneOAc-2-CC-buteneTMS Co2(CO)6 13C  
 Experiment 2  
 Pica 300 Topspin  
 Date 09 March 2012

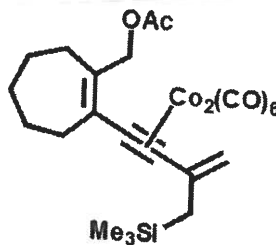

3b

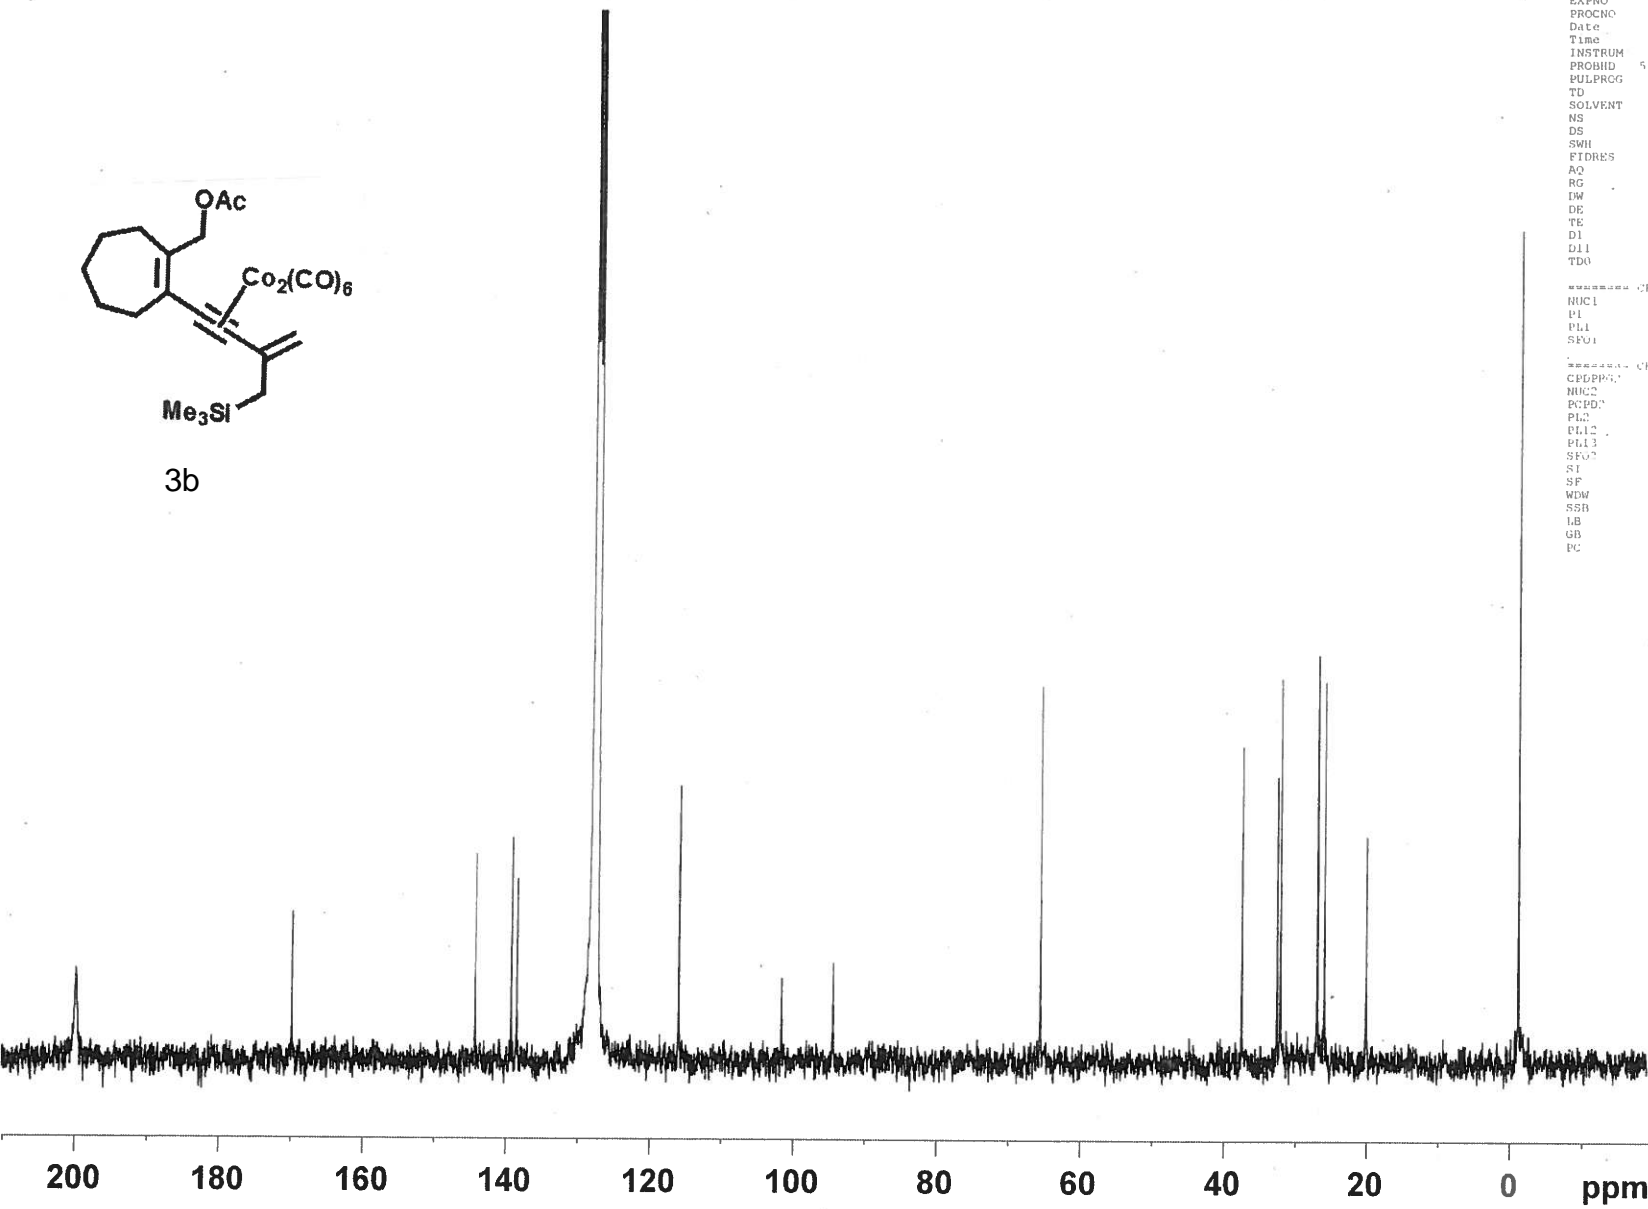

```

NAME      'cyclohepteneOAc-2-CC-buteneTMS Co2(CO)6 13C
EXPNO     2
PROCNO    1
Date_     20120309
Time      11.11
INSTRUM   spect
PROBHD    5 mm PABBO BB-
PULPROG   zgpg30
TD         65536
SOLVENT   CDCl3
NS         1995
DS         4
SWH        17985.611 Hz
FIDRES     1.097755 Hz
AQ         0.4555252 sec
RG         18390.4
DW         77.800 usec
DE         6.90 usec
TE         295.3 K
D1         1.00000000 sec
D11        0.03000000 sec
TD0        1

===== CHANNEL f1 =====
NUC1       13C
P1         11.25 usec
PL1        0.00 dB
SFO1       101.62533 MHz

===== CHANNEL f2 =====
CPDPRG2    waltz16
NUC2       1H
PCPD2      40.00 usec
PL2         0.00 dB
PL12        16.55 dB
PL13        24.00 dB
SFO2       500.131005 MHz
SI         3193
SF         500.131005 MHz
WDW         EM
SSB         0
LB          2.50 Hz
GB          0
PC          1.40
  
```

CyclohexeneCycloheptynemethylene  
 Thursday 04 April 2013  
 Topspin 300  
 Experiment 4

Current Data Parameters  
 NAME CyclohexeneCycloheptynemethylene  
 EXFNO 4  
 PROCNO 1

F2 - Acquisition Parameters  
 Date\_ 20130404  
 Time\_ 20.52  
 INSTRUM spect  
 PROBHD 5 mm BBO BB-1H  
 PULPROG zg30  
 TD 32768  
 SOLVENT CDCl3  
 NS 8  
 DS 2  
 SWH 6172.839 Hz  
 FIDRES 0.188380 Hz  
 AQ 2.6542580 sec  
 RG 287.4  
 DW 81.000 usec  
 DE 6.00 usec  
 TE 300.0 K  
 D1 1.00000000 sec  
 TD0 1

===== CHANNEL f1 =====  
 NUC1 1H  
 P1 13.50 usec  
 PL1 0.00 dB  
 SFO1 300.2315011 MHz

F2 - Processing parameters  
 SI 32768  
 SF 300.2300384 MHz  
 WDW no  
 SSB 0  
 LB 0.00 Hz  
 GB 0  
 PC 1.00

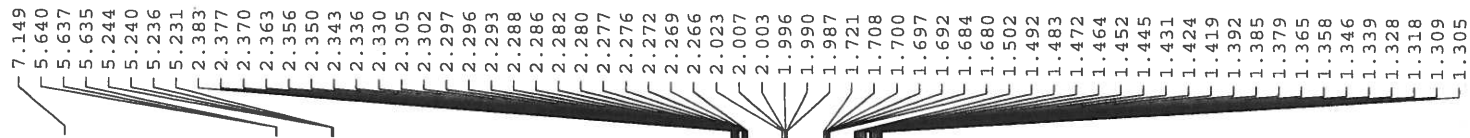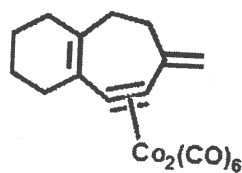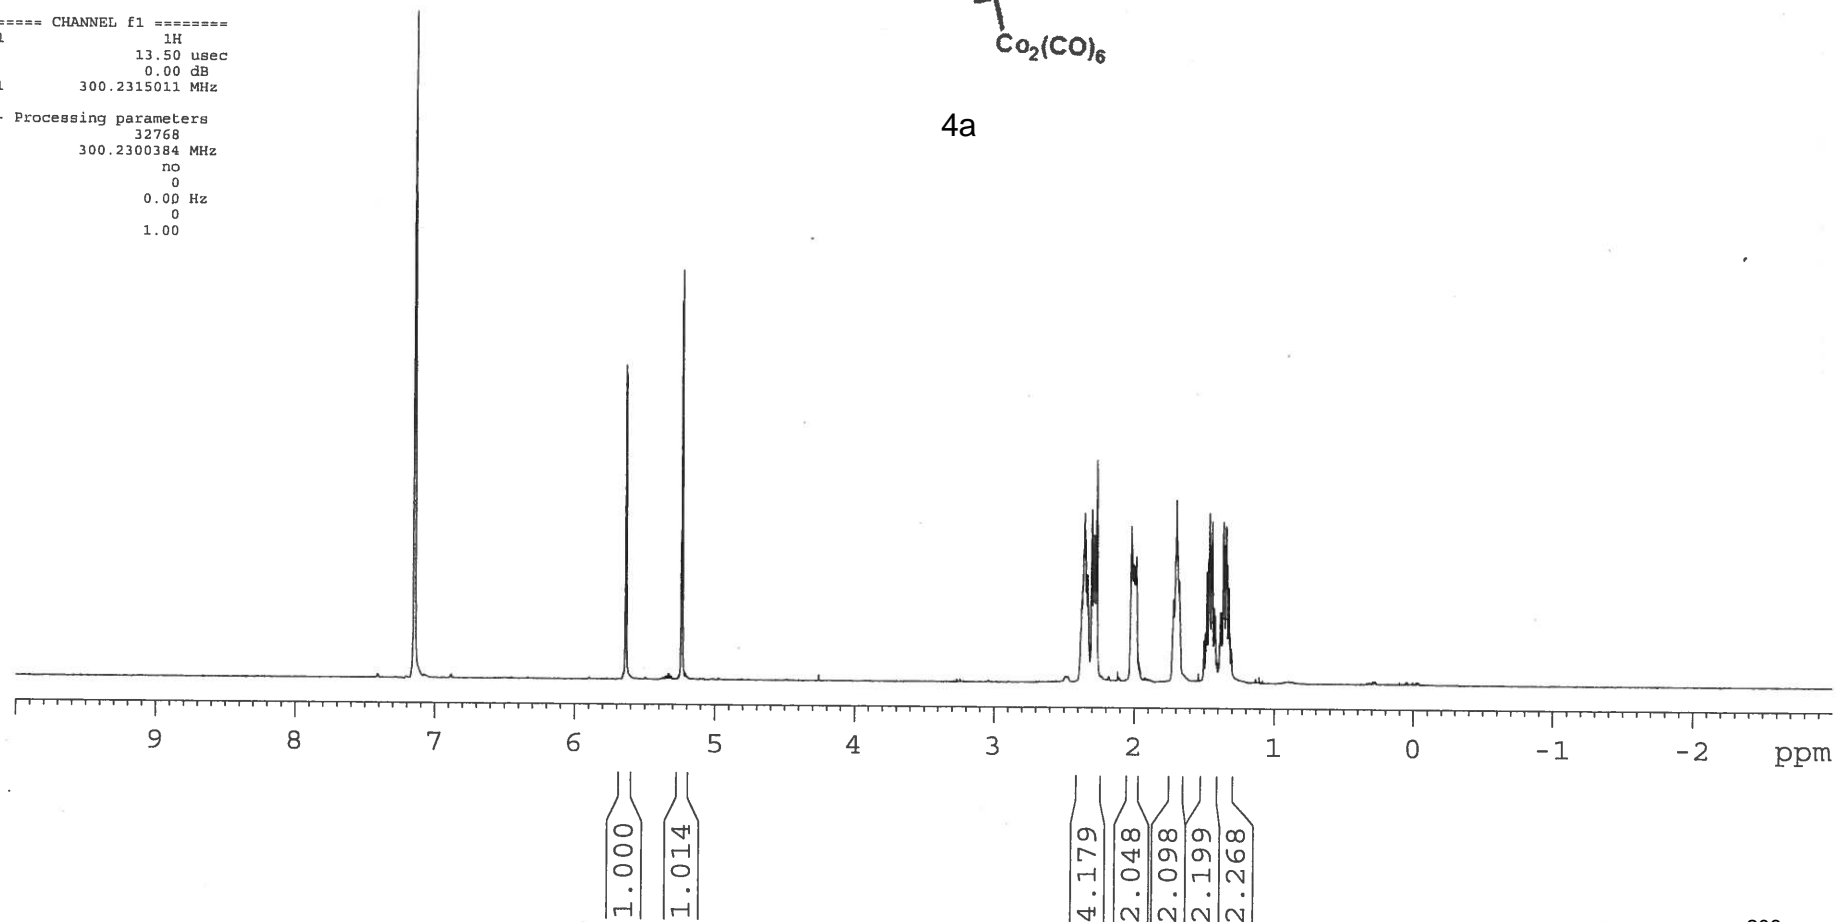

CyclohexeneCycloheptynemethylene 13C  
 Experiment 1 Topspin 300  
 12 March 2012  
 Reaction with SnCl<sub>4</sub> and Diisopropylethylamine

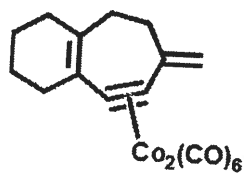

4a

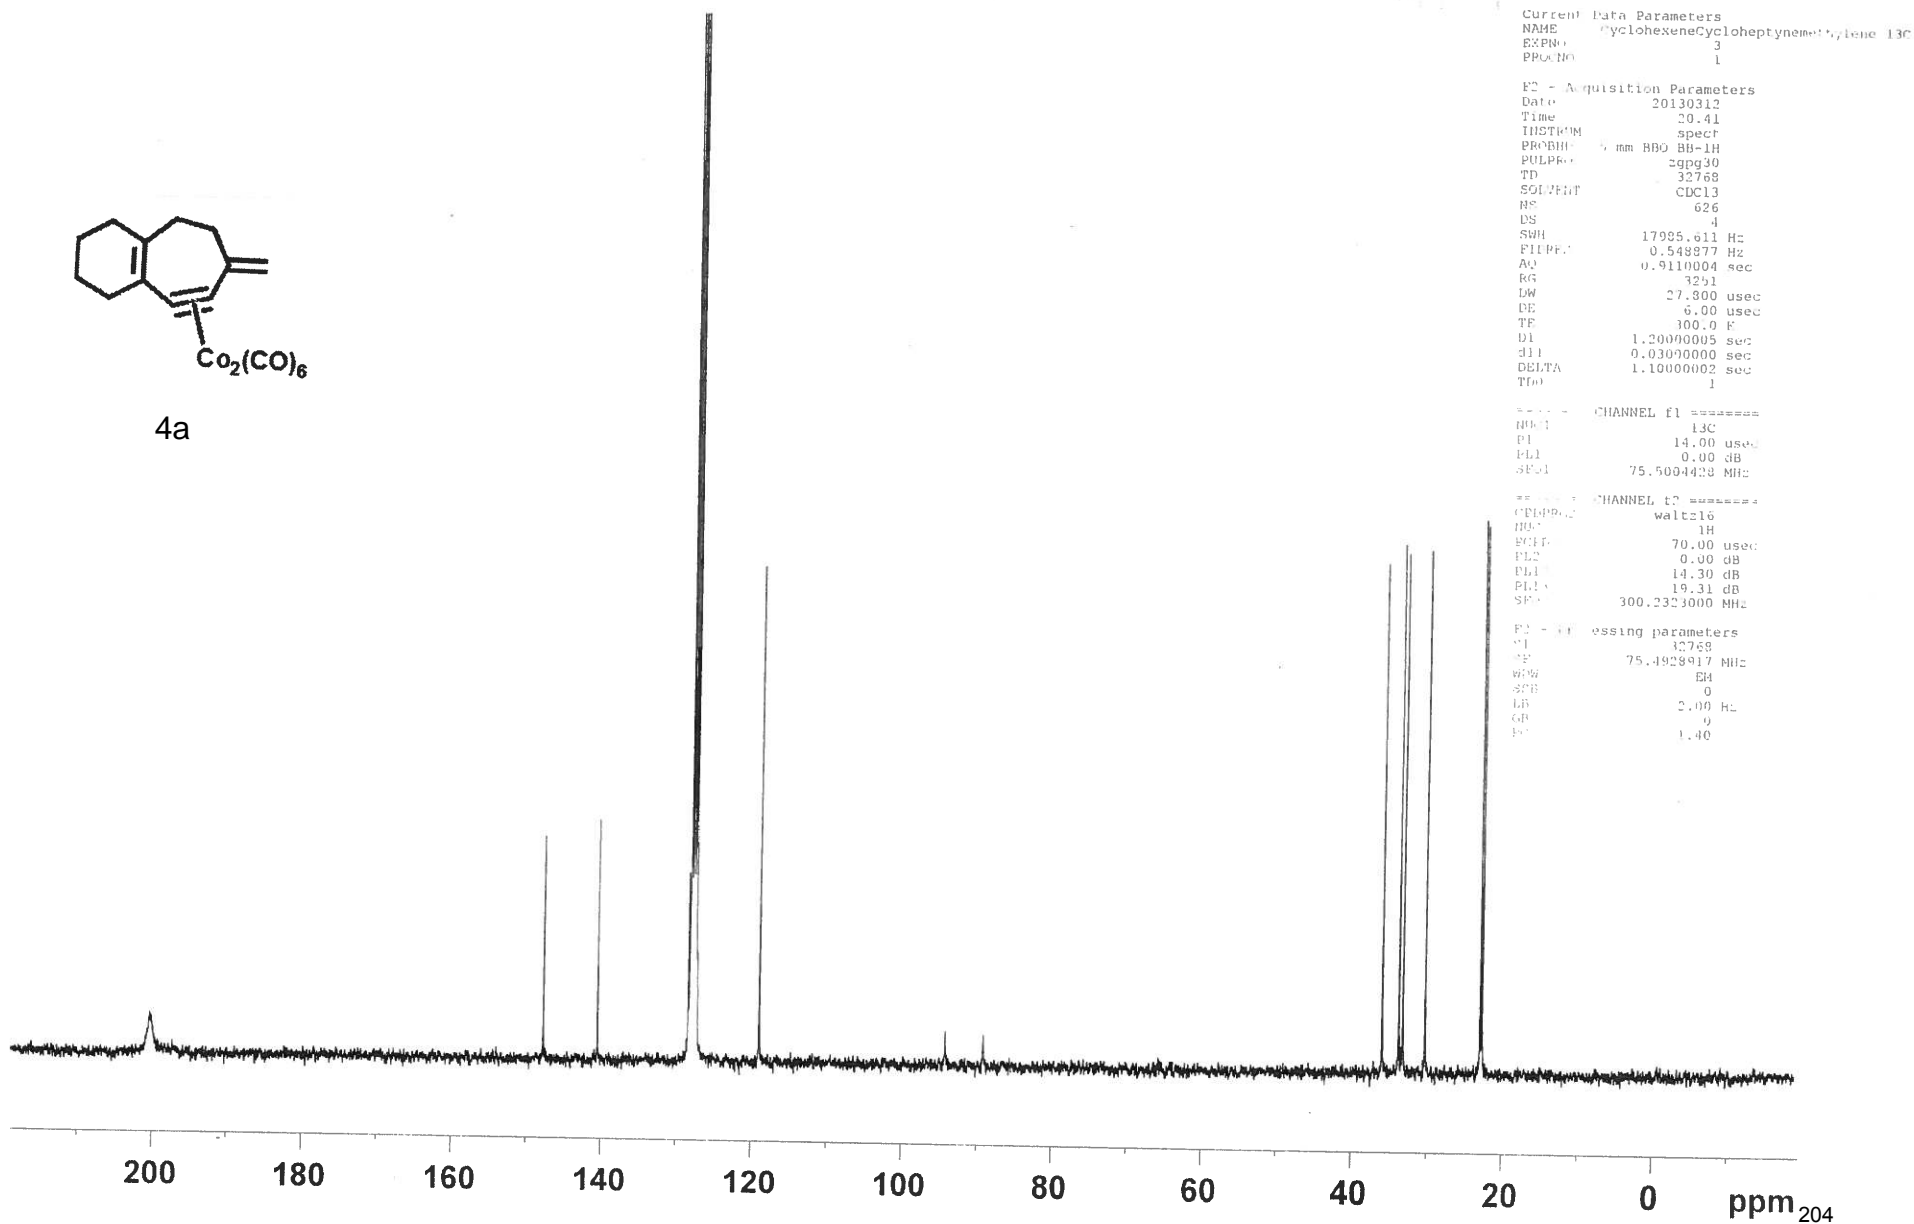



CyclohepteneCycloheptyneMethylenecycloheptene  
 Experiment 5 Topspin 500 31.100  
 Tuesday 26 March 2012 5.1604  
 Reaction done with SnCl4 and IPrNEt 5.6803  
 5.6801  
 5.2199  
 5.2066  
 5.2144  
 5.2022  
 2.4766  
 2.4655  
 2.4544  
 2.3244  
 2.3144  
 2.3133  
 2.3100  
 2.3088  
 2.3022  
 2.1833  
 2.1788  
 2.1733  
 2.1622  
 2.0233  
 2.0111  
 2.0000  
 1.5966  
 1.5877  
 1.5855  
 1.5800  
 1.5744  
 1.5666  
 1.5622  
 1.5577  
 1.5511  
 1.5033  
 1.4999  
 1.4977  
 1.4922  
 1.4866

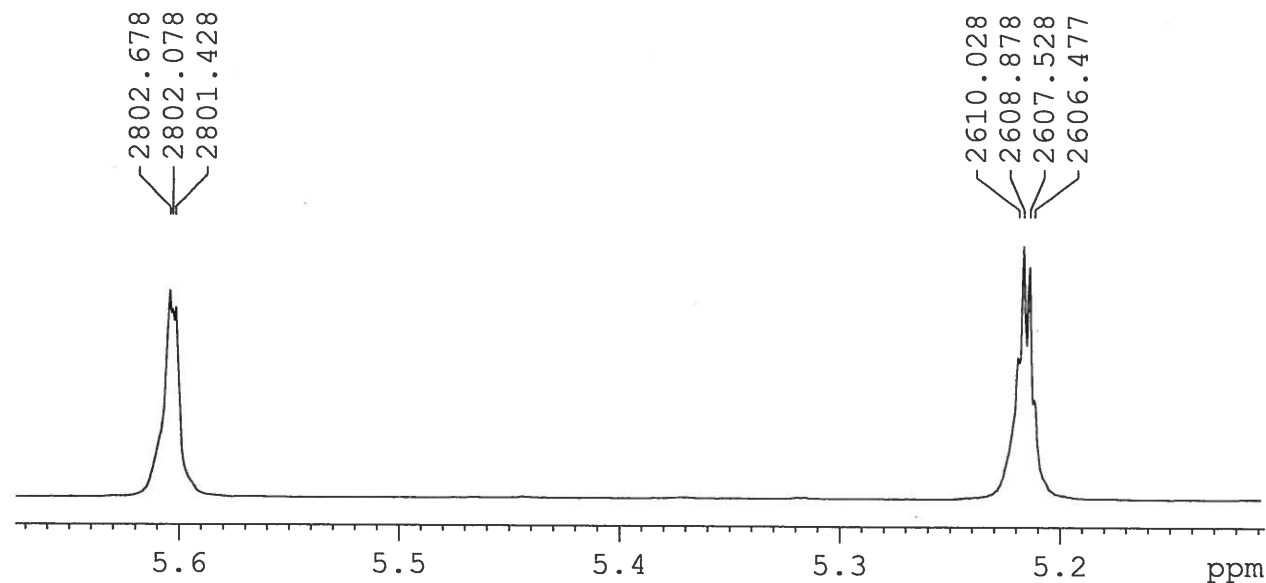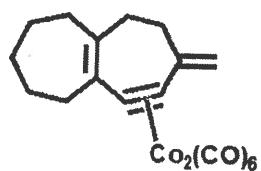

Current Data Parameters  
 NAME CyclohepteneCycloheptyneMethylene Co2(CO)6  
 EXPNO 5  
 PROCNO 1

F2 - Acquisition Parameters  
 Date\_ 20130326  
 Time 16.15  
 INSTRUM spect  
 PROBHD 5 mm PABBO BB/  
 PULPROG zgpg30  
 TD 32768  
 SOLVENT C6D6  
 NS 16  
 DS 2  
 SWH 11029.412 Hz  
 FIDRES 0.336591 Hz  
 AQ 1.4854827 sec  
 RG 31.67  
 DW 45.333 usec  
 DE 6.50 usec  
 TE 293.9 K  
 D1 1.00000000 sec  
 D12 0.00002000 sec  
 D16 0.00020000 sec  
 TDO 1

===== CHANNEL f1 =====  
 SFO1 500.1298500 MHz  
 NUC1 1H  
 P1 14.80 usec  
 P2 29.60 usec  
 P12 2000.00 usec  
 PLW0 0 W  
 PLW1 12.23400021 W  
 SPNAM[1] Squal100.1000  
 SPOAL1 0.500  
 SPOFFS1 0 Hz  
 SPW1 0.00267970 W

===== GRADIENT CHANNEL =====  
 GPNAM[1] SMSQ10.100  
 GPNAM[2] SMSQ10.100  
 GPZ1 31.00 %  
 GPZ2 11.00 %  
 P16 1000.00 usec

F2 - Processing parameters  
 SI 32768  
 SF 500.1299967 MHz  
 WDW no  
 SSB 0  
 LB 0 Hz  
 GB 0  
 PC 1.00

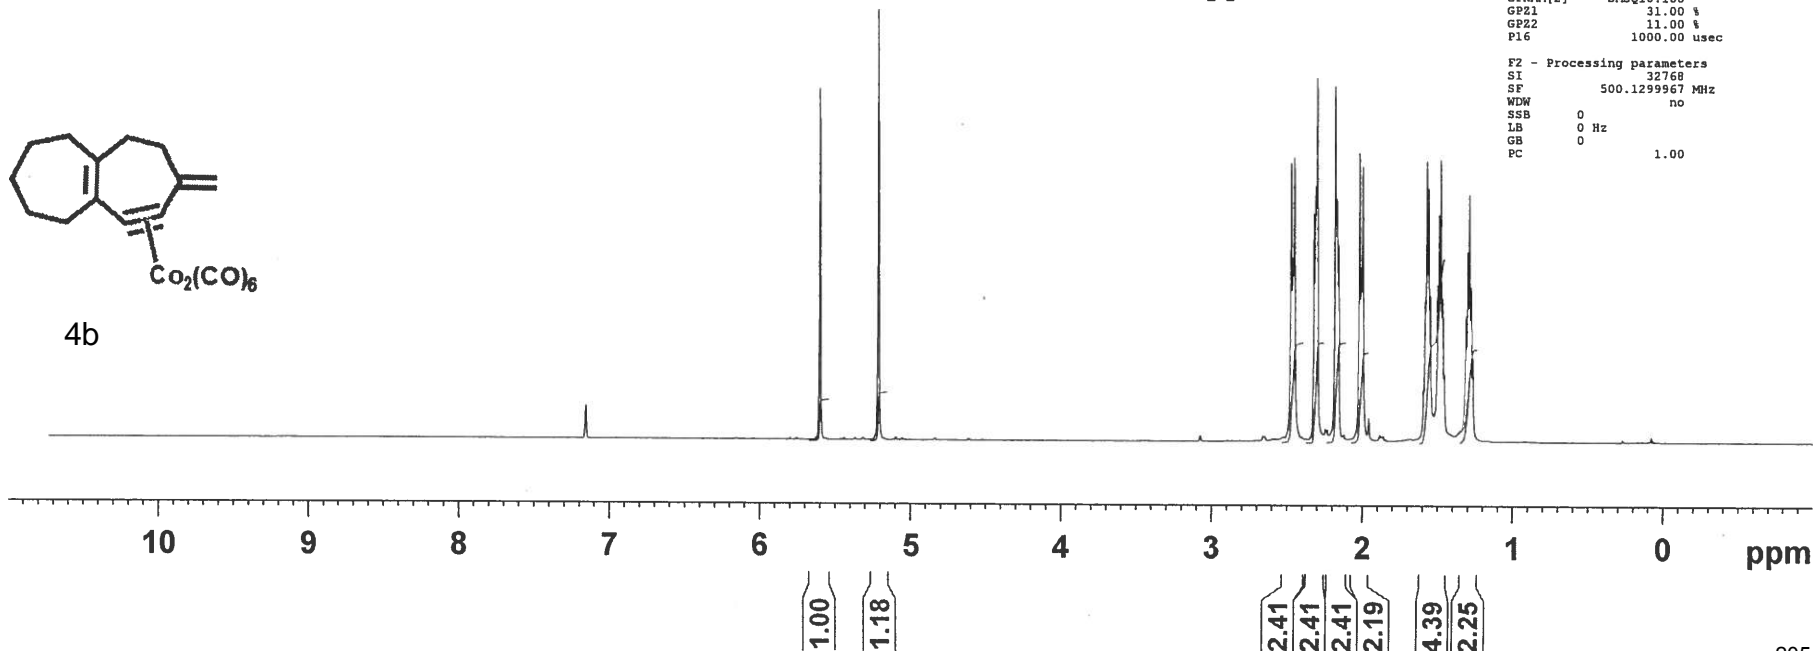

CyclohepteneCycloheptynemethylene 13C  
 Experiment 3 Topspin 300  
 Tuesday 26 March 2013  
 Reaction done with SnCl4 and iPrNEt

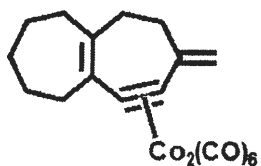

4b

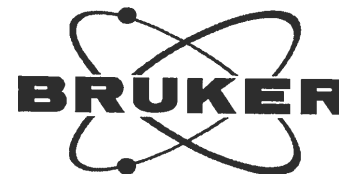

Current Data Parameters  
 NAME CyclohepteneCycloheptynemethylene 13C  
 EXPNO 1  
 PROCNO 1

F2 - Acquisition Parameters  
 Date\_ 20130306  
 Time 14:27  
 INSTRUM spect  
 PROBHD 5 mm BBO BB-1H  
 PULPROG zgpg30  
 TD 131072  
 SOLVENT CDCl3  
 NS 256  
 DS 4  
 SWH 17005.511 Hz  
 FIDRES 0.244477 Hz  
 AQ 9.9119994 sec  
 RG 18.118  
 DW 6.499 usec  
 DE 0.00 usec  
 TE 300.2 K  
 D1 1.0000000 sec  
 d11 0.0000000 sec  
 DELTA 1.0000000 sec  
 TDO 1

===== CHANNEL f1 =====  
 NUC1 13C  
 P1 12.00 usec  
 PL1 0.00 dB  
 SFO1 101.325418 MHz

===== CHANNEL f2 =====  
 CDDPRG2 zgpg30  
 NUC2 1H  
 PCPDC 19.00 usec  
 PL2 1.00 dB  
 PL12 14.00 dB  
 PL13 19.00 dB  
 SFO2 400.146000 MHz

F2 - Processing parameters  
 SI 32768  
 SF 201.261012 MHz  
 WDW EM  
 SSB 0  
 LB 1.00 Hz  
 GB 0  
 PC 1.00

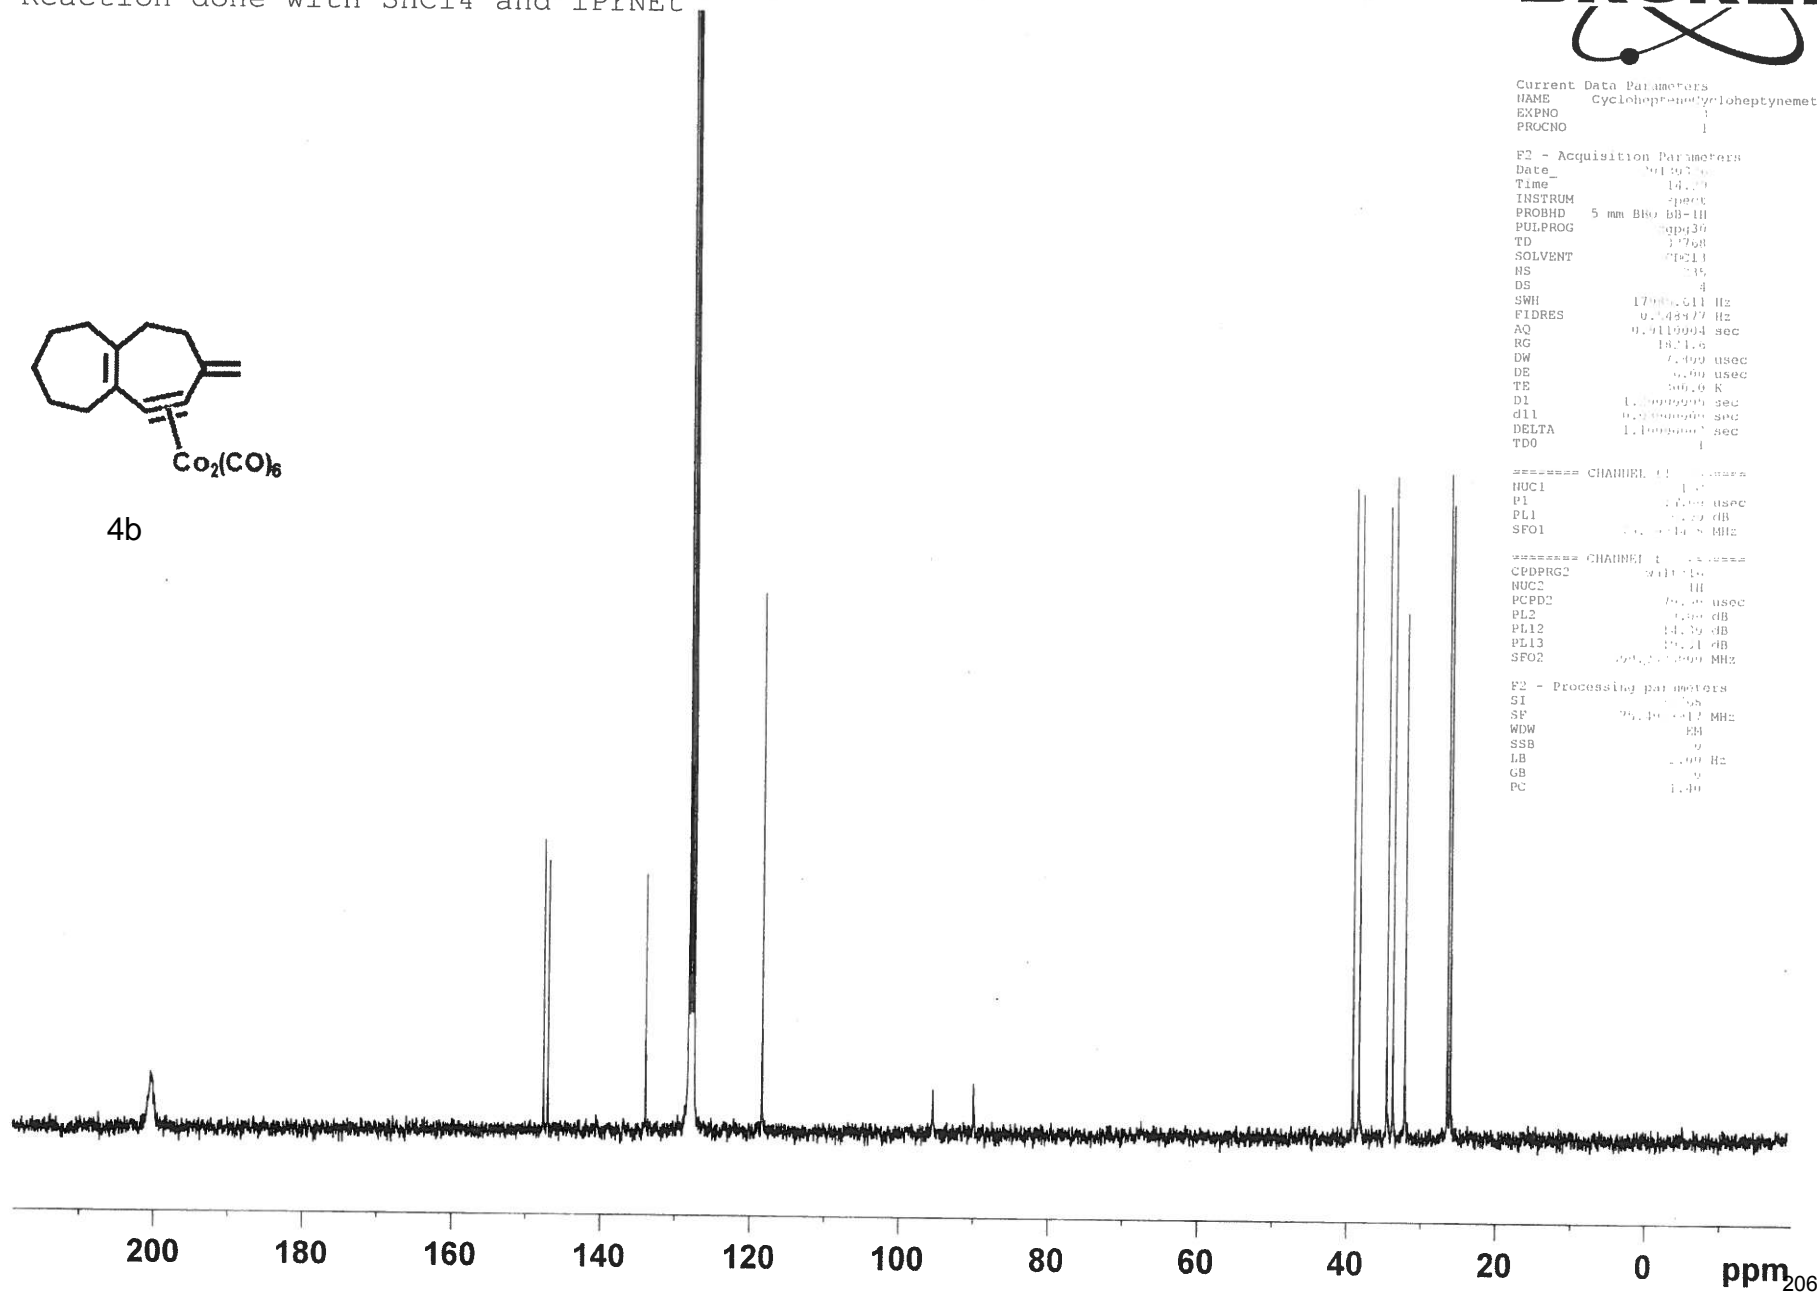

ThiopheneCHO-CC-1,3-Benzene  
 Experiment 1 Topspin 300  
 Wednesday 26 June 2013

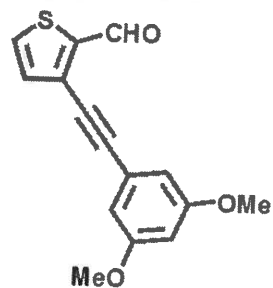

18c

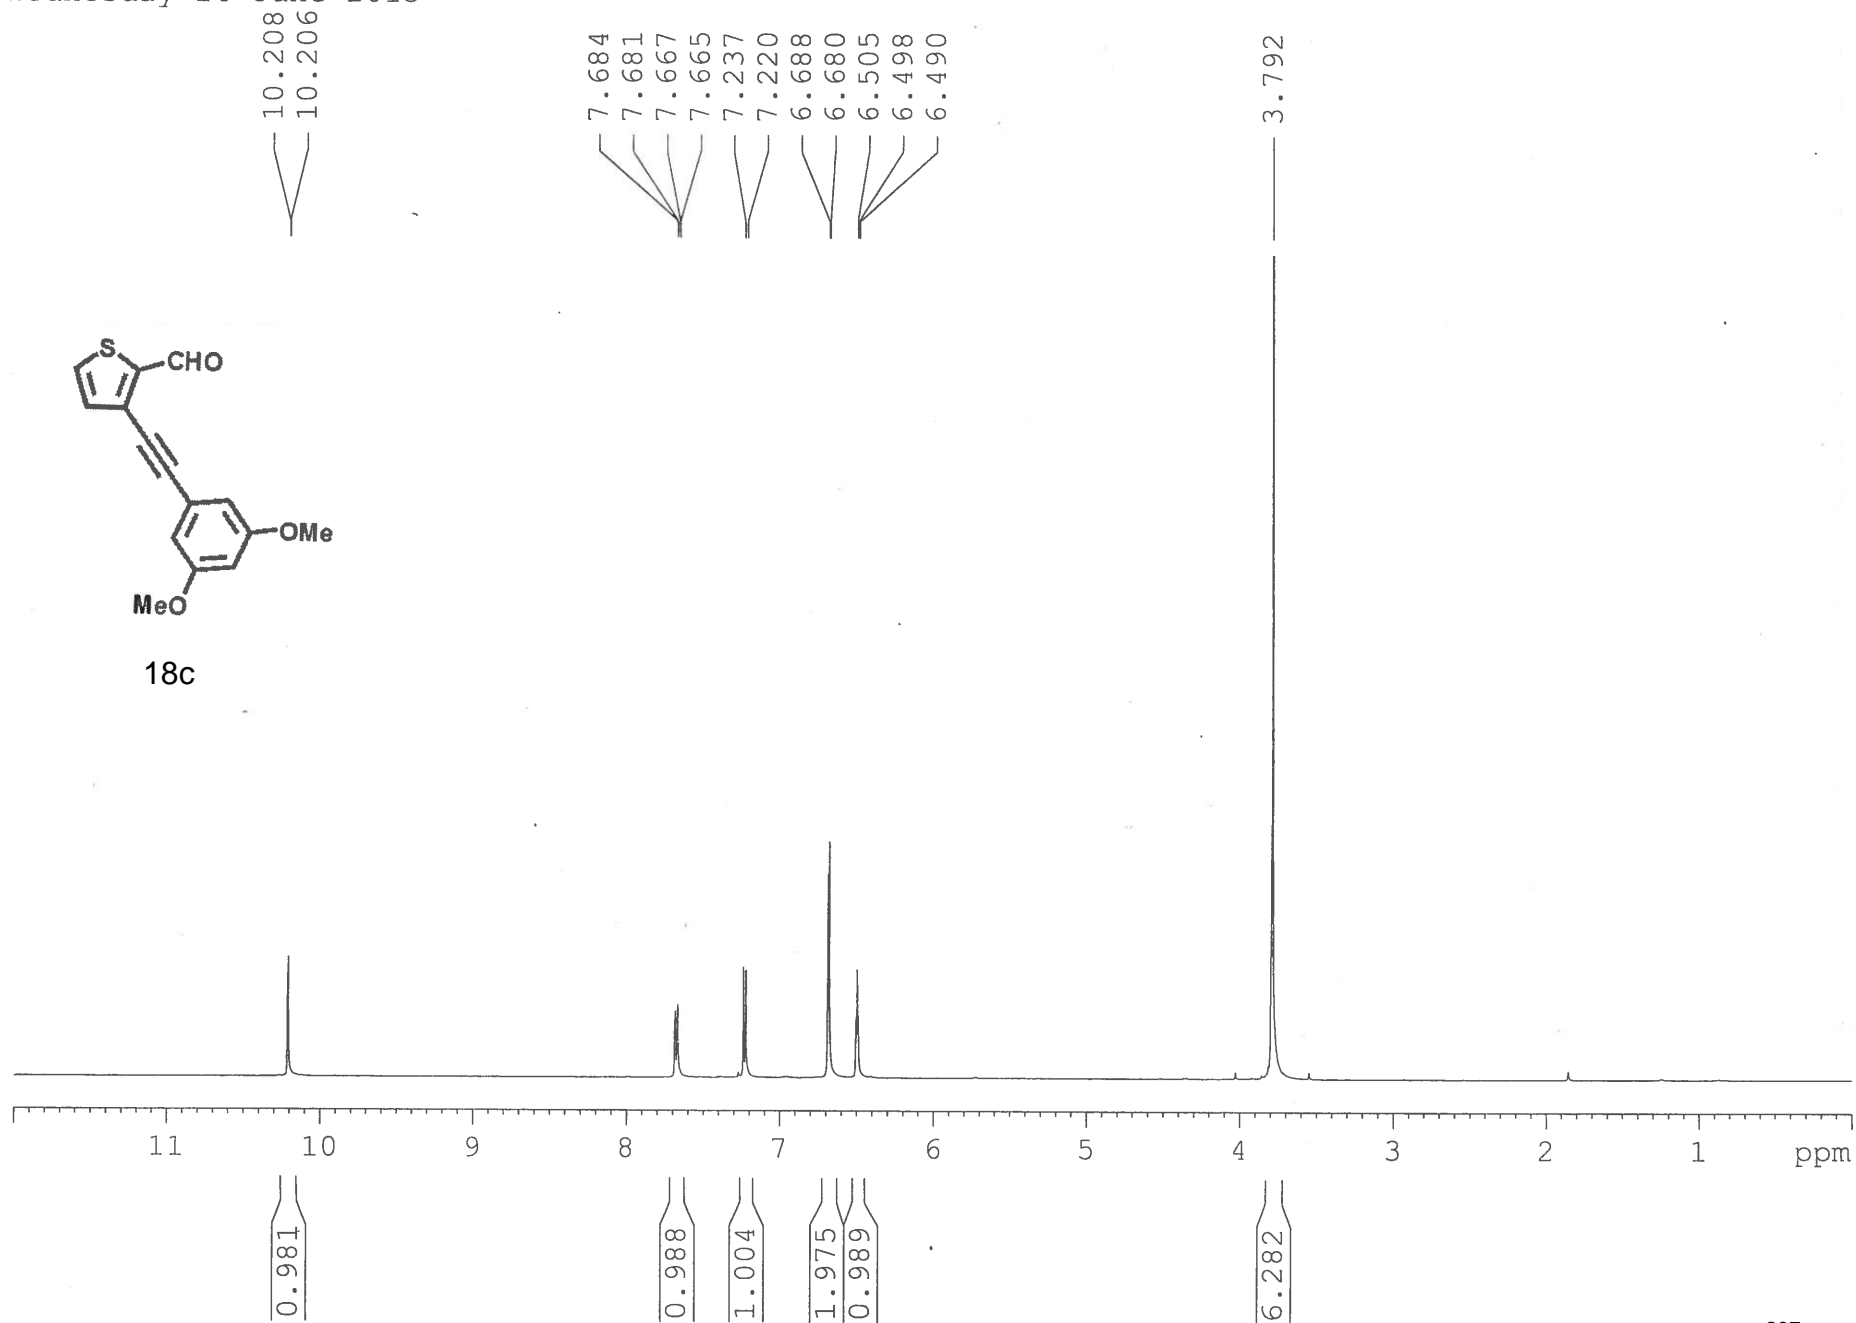

ThiopheneCHO-CC-1,3-Benzene 13C  
 Experiment 1  
 Topspin 300  
 Wednesday 26 June 2013

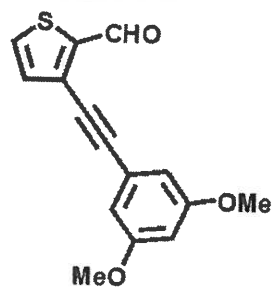

18c

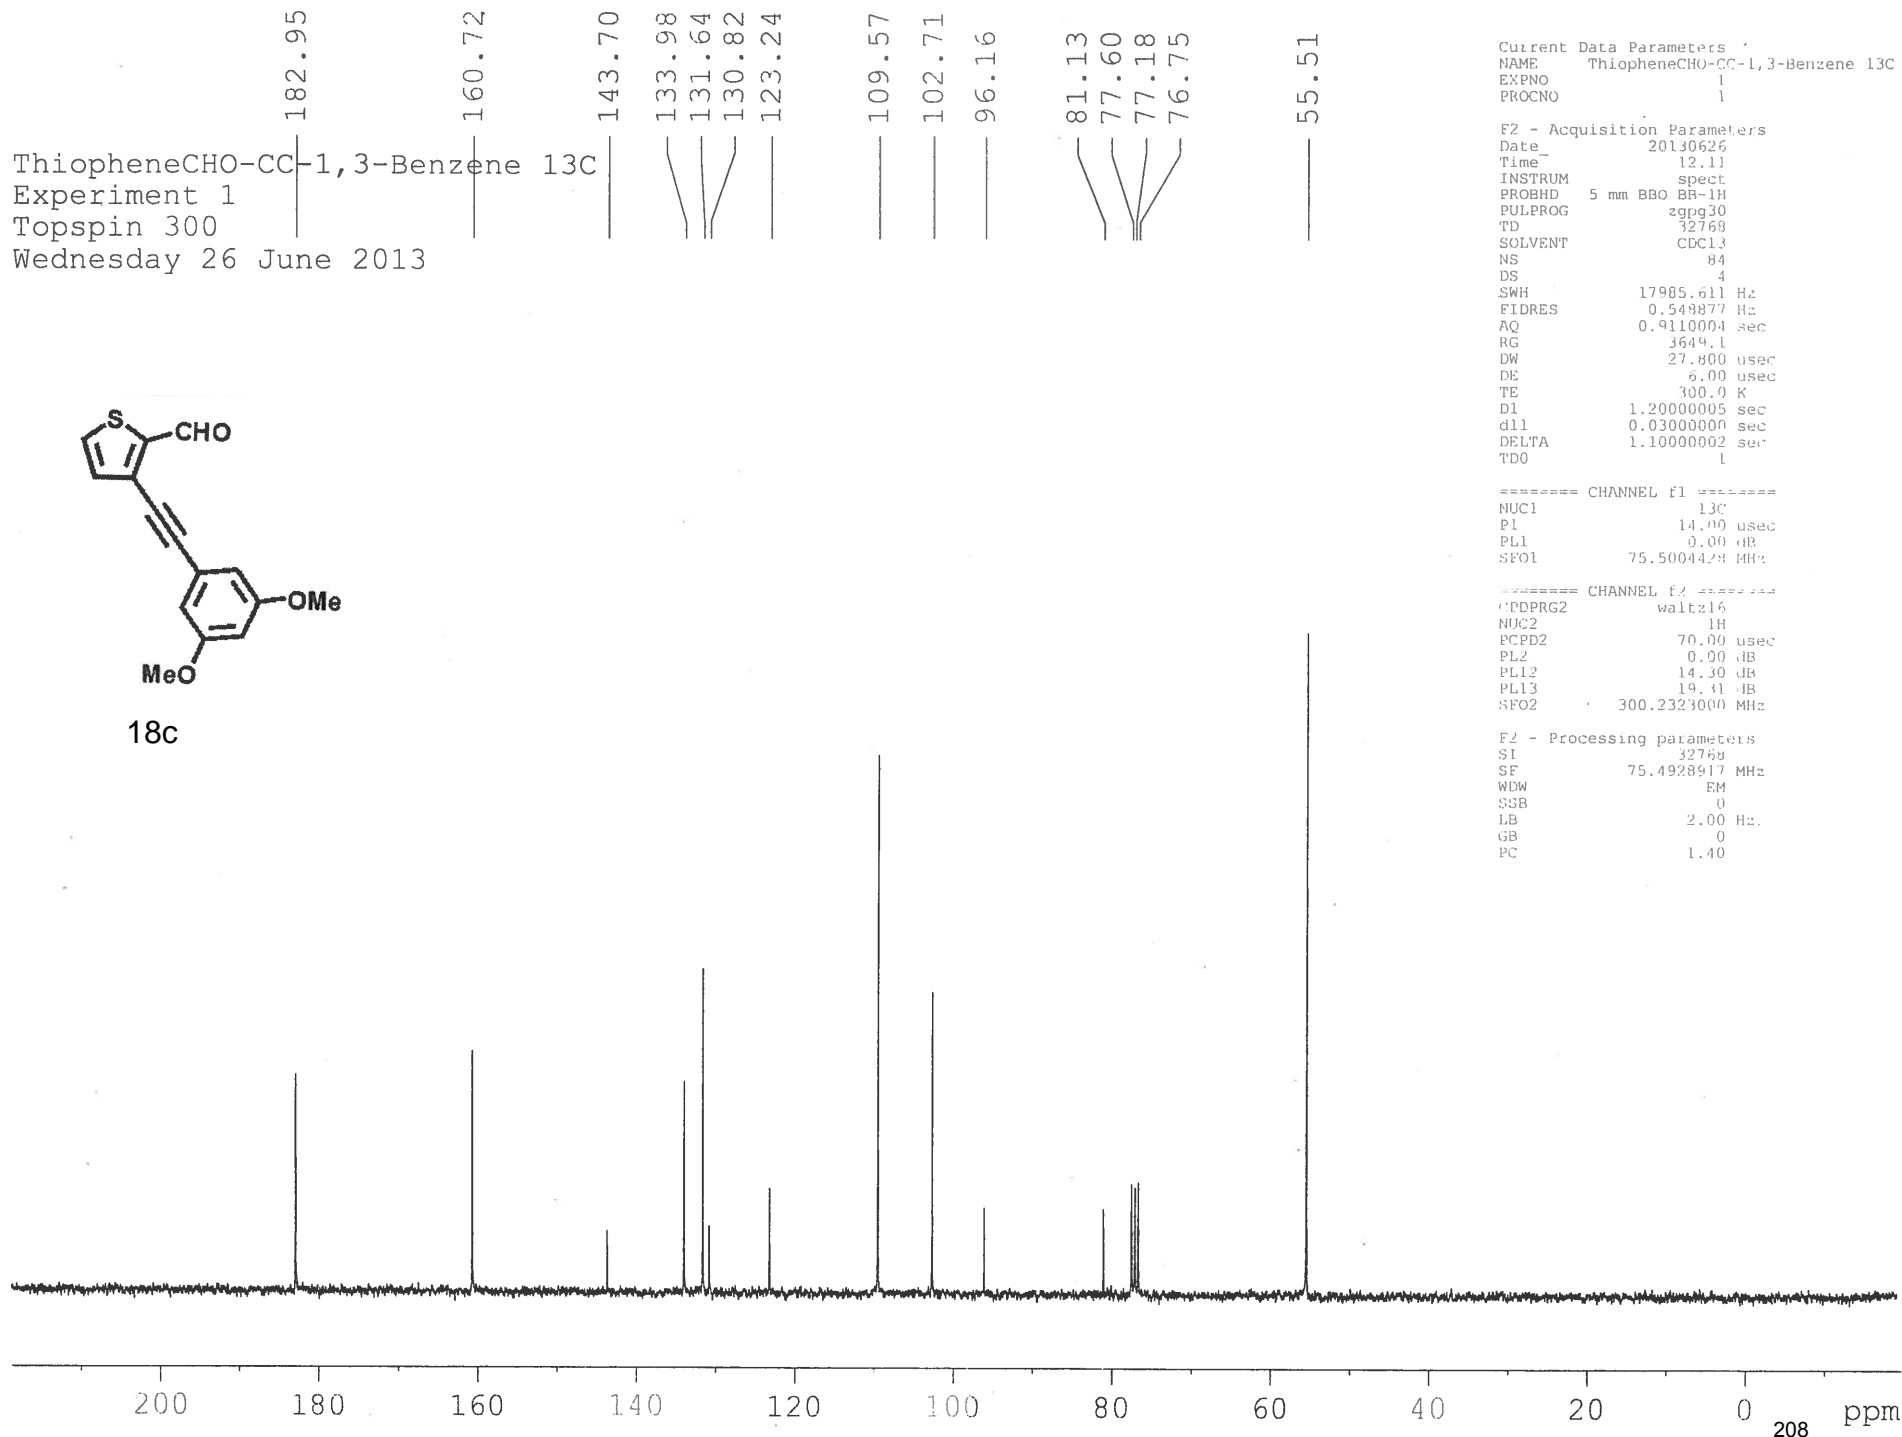

Current Data Parameters  
 NAME ThiopheneCHO-CC-1,3-Benzene 13C  
 EXPNO 1  
 PROCNO 1

F2 - Acquisition Parameters  
 Date\_ 20130626  
 Time\_ 12.11  
 INSTRUM spect  
 PROBHD 5 mm BBO BB-1H  
 PULPROG zgpg30  
 TD 32768  
 SOLVENT CDCl3  
 NS 84  
 DS 4  
 SWH 17985.611 Hz  
 FIDRES 0.549877 Hz  
 AQ 0.9110004 sec  
 RG 3649.1  
 DW 27.800 usec  
 DE 6.00 usec  
 TE 300.0 K  
 D1 1.20000005 sec  
 d11 0.03000000 sec  
 DELTA 1.10000002 sec  
 TDO 1

===== CHANNEL f1 =====  
 NUC1 13C  
 P1 14.00 usec  
 PL1 0.00 dB  
 SFO1 75.500424 MHz

===== CHANNEL f2 =====  
 CPDPRG2 waltz16  
 NUC2 1H  
 PCPD2 70.00 usec  
 PL2 0.00 dB  
 PL12 14.30 dB  
 PL13 19.41 dB  
 SFO2 300.2323000 MHz

F2 - Processing parameters  
 SI 32768  
 SF 75.4928917 MHz  
 WDW EM  
 SSB 0  
 LB 2.00 Hz  
 GB 0  
 PC 1.40

FuranCHO-CC-1,3-Dimethoxybenzene  
 Experiment 1 Topspin 500 V3.2  
 Friday 12 Julv 2013

Current Data Parameters  
 NAME FuranCHO-CC-1,3-Dimethoxybenzene  
 EXPNO 1  
 PROCNO 1

F2 - Acquisition Parameters  
 Date\_ 20130712  
 Time 11.01  
 INSTRUM spect  
 PROBHD 5 mm PABBO BB/  
 PULPROG zg30  
 TD 65536  
 SOLVENT CDC13  
 NS 8  
 DS 2  
 SWH 10000.000 Hz  
 FIDRES 0.152588 Hz  
 AQ 3.2767999 sec  
 RG 82.19  
 DW 50.000 usec  
 DE 6.50 usec  
 TE 293.7 K  
 D1 1.00000000 sec  
 TD0 1

===== CHANNEL f1 =====  
 SFO1 500.1330885 MHz  
 NUC1 1H  
 P1 12.06 usec  
 PLW1 18.00000000 W

F2 - Processing parameters  
 SI 65536  
 SF 500.130064 MHz  
 WDW no  
 SSB 0 Hz  
 LB 0  
 GB 0  
 PC 1.00

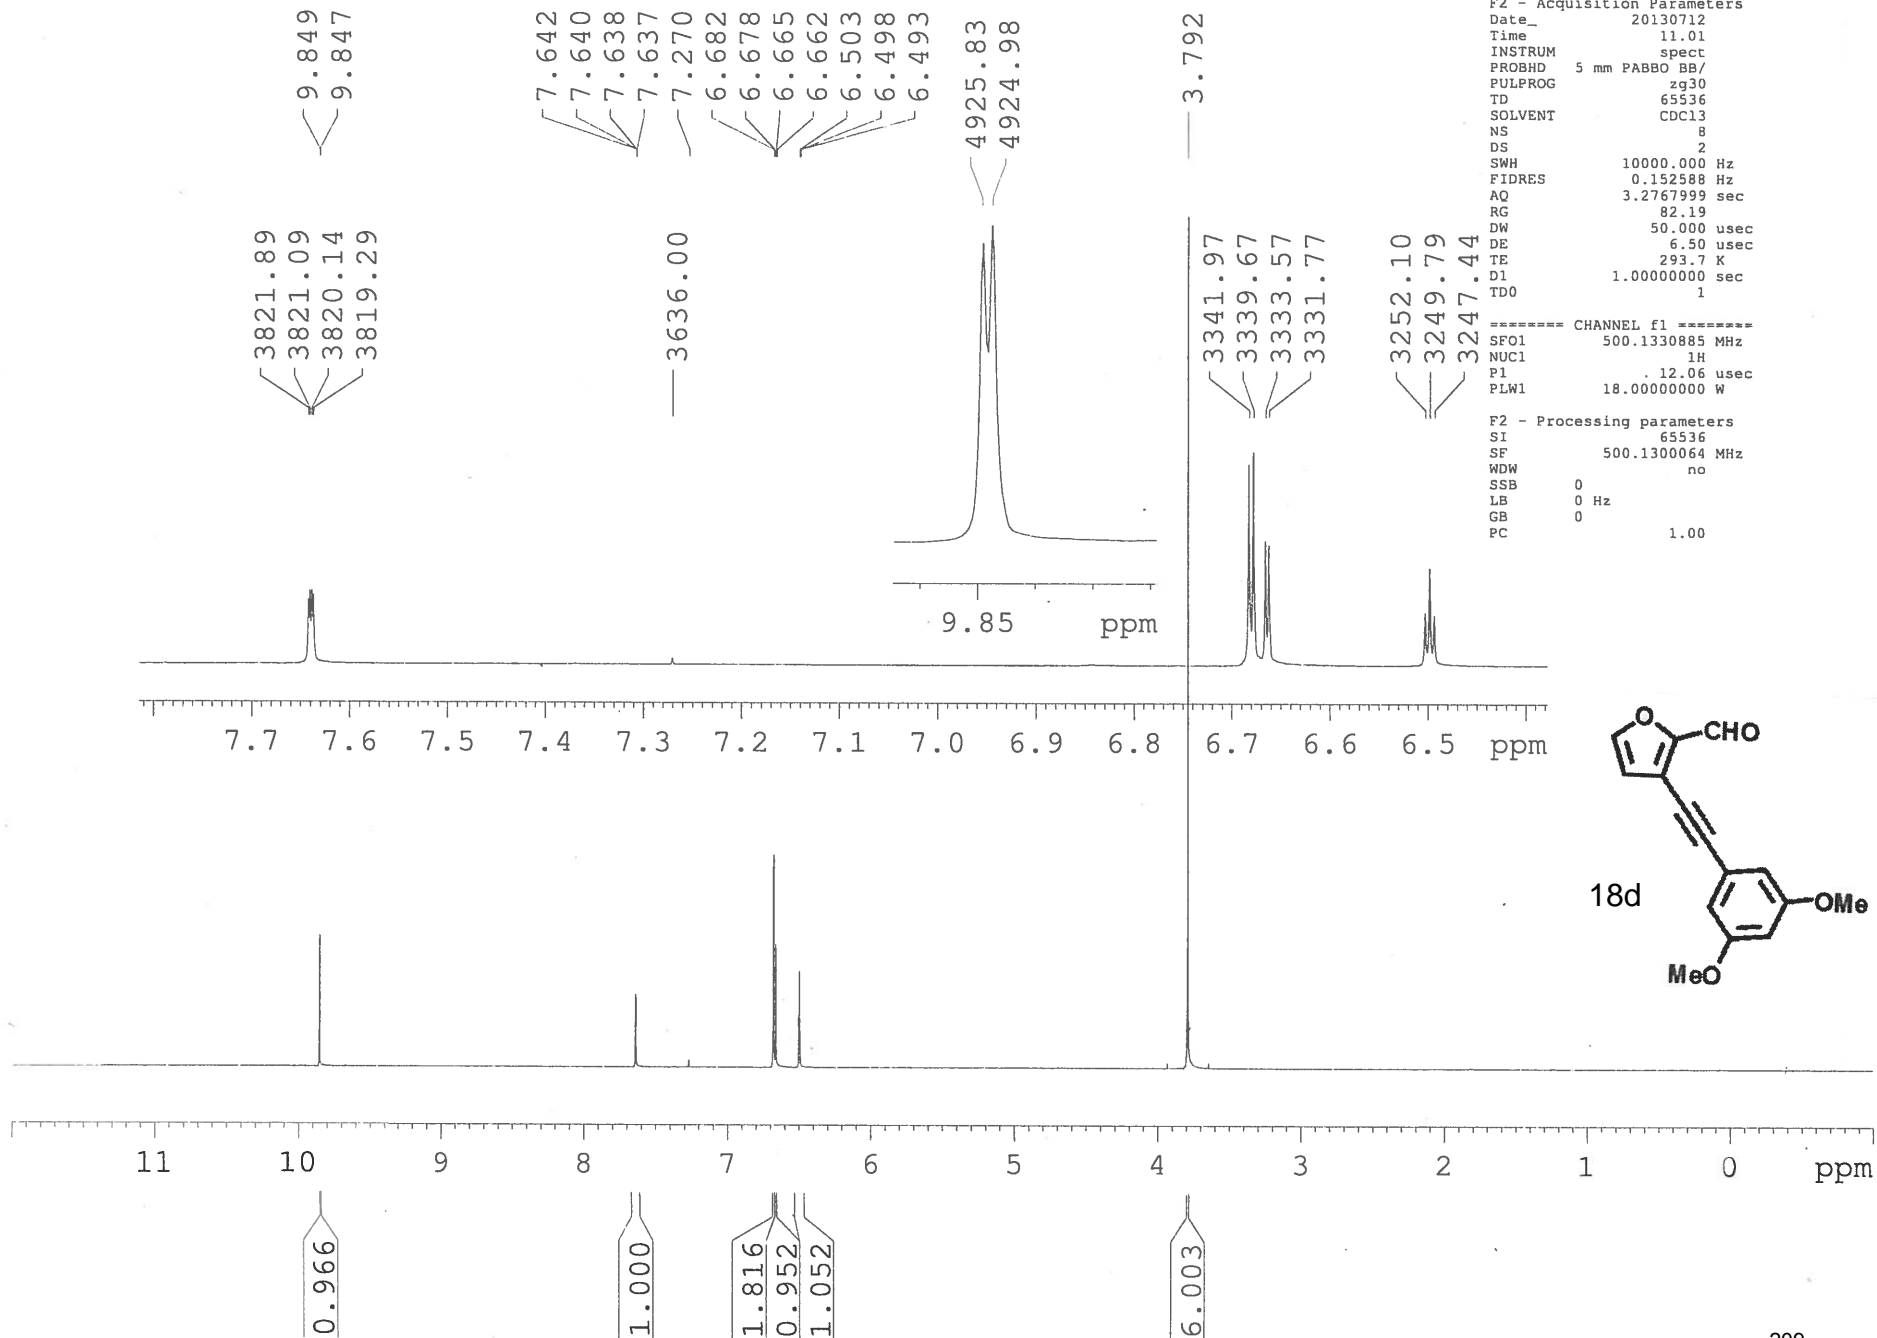

FuranCHO-CC-1,3-Dimethoxybenzene 13C  
 Experiment 1 Topspin 500 V3.2  
 Friday 12 July 2013

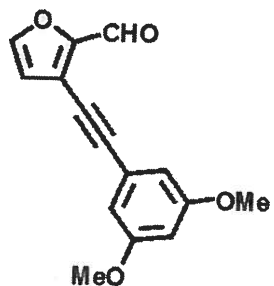

18d

—176.108  
 —160.643  
 —152.760  
 —147.577  
 —123.058  
 —119.434  
 —115.224  
 —109.513  
 —102.743  
 —97.402  
 77.775  
 77.363  
 77.109  
 76.854  
 —55.472

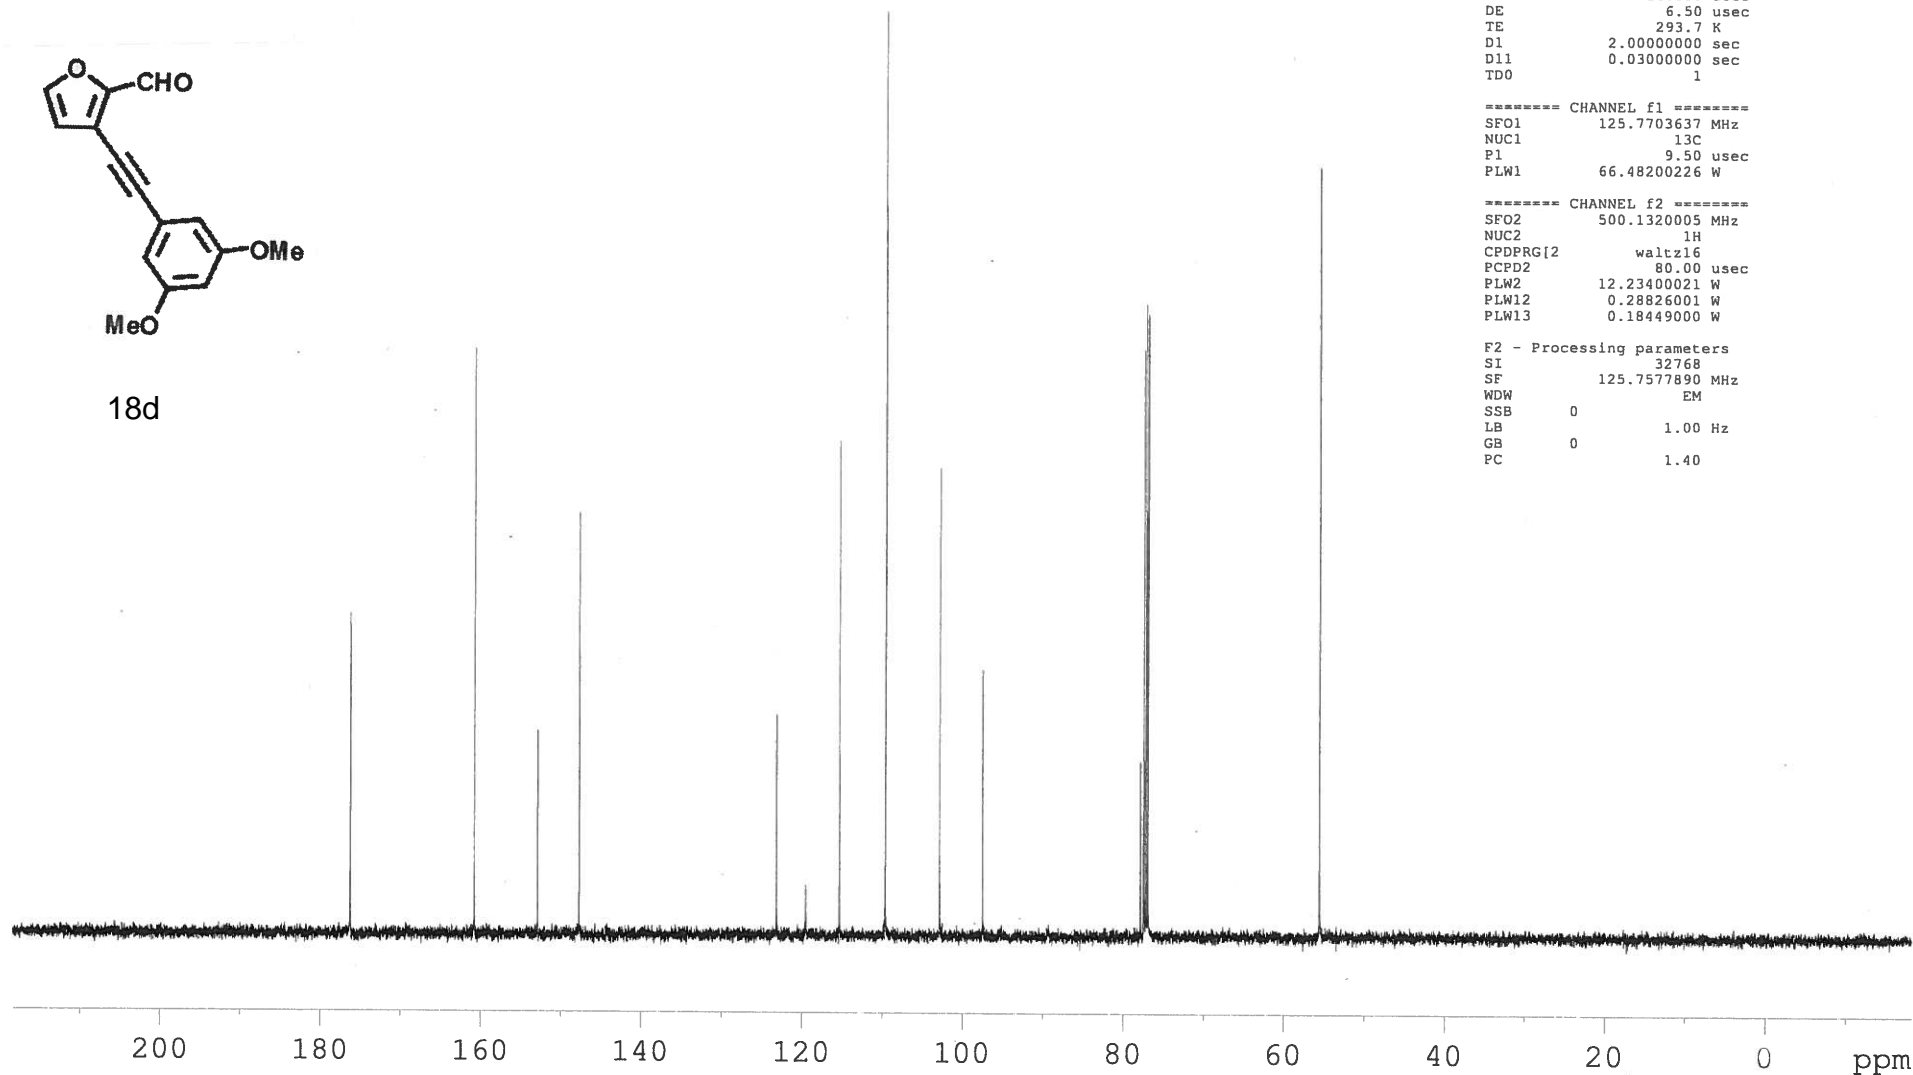

Current Data Parameters  
 NAME FuranCHO-CC-1,3-Dimethoxybenzene 13C  
 EXPNO 1  
 PROCNO 1

F2 - Acquisition Parameters  
 Date\_ 20130712  
 Time 11.09  
 INSTRUM spect  
 PROBHD 5 mm PABBO BB/  
 PULPROG zgpg30  
 TD 65536  
 SOLVENT CDCl3  
 NS 72  
 DS 4  
 SWH 29761.904 Hz  
 FIDRES 0.454131 Hz  
 AQ 1.1010048 sec  
 RG 203.82  
 DW 16.800 usec  
 DE 6.50 usec  
 TE 293.7 K  
 D1 2.00000000 sec  
 D11 0.03000000 sec  
 TD0 1

===== CHANNEL f1 =====  
 SFO1 125.7703637 MHz  
 NUC1 13C  
 P1 9.50 usec  
 PLW1 66.48200226 W

===== CHANNEL f2 =====  
 SFO2 500.1320005 MHz  
 NUC2 1H  
 CPDPRG[2] waltz16  
 PCPD2 80.00 usec  
 PLW2 12.23400021 W  
 PLW12 0.28826001 W  
 PLW13 0.18449000 W

F2 - Processing parameters  
 SI 32768  
 SF 125.7577890 MHz  
 WDW EM  
 SSB 0  
 LB 1.00 Hz  
 GB 0  
 PC 1.40

BenzaldOAc-CC-Anisole

Experiment 1

Topspin 500 V3.2

Monday 17 June 2013

7.586  
7.583  
7.449  
7.446  
7.434  
7.432  
7.370  
7.367  
7.355  
7.352  
7.341  
7.336  
7.325  
7.322  
7.310  
7.307  
7.291  
7.275  
7.270  
7.259  
7.188  
7.185  
7.183  
7.173  
7.170  
7.168  
7.123  
7.120  
7.118  
7.115  
6.936  
6.934  
6.930  
6.929  
6.919  
6.917  
6.914  
6.912  
5.400  
3.813

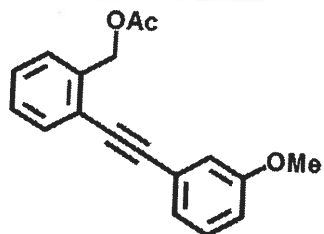

19a

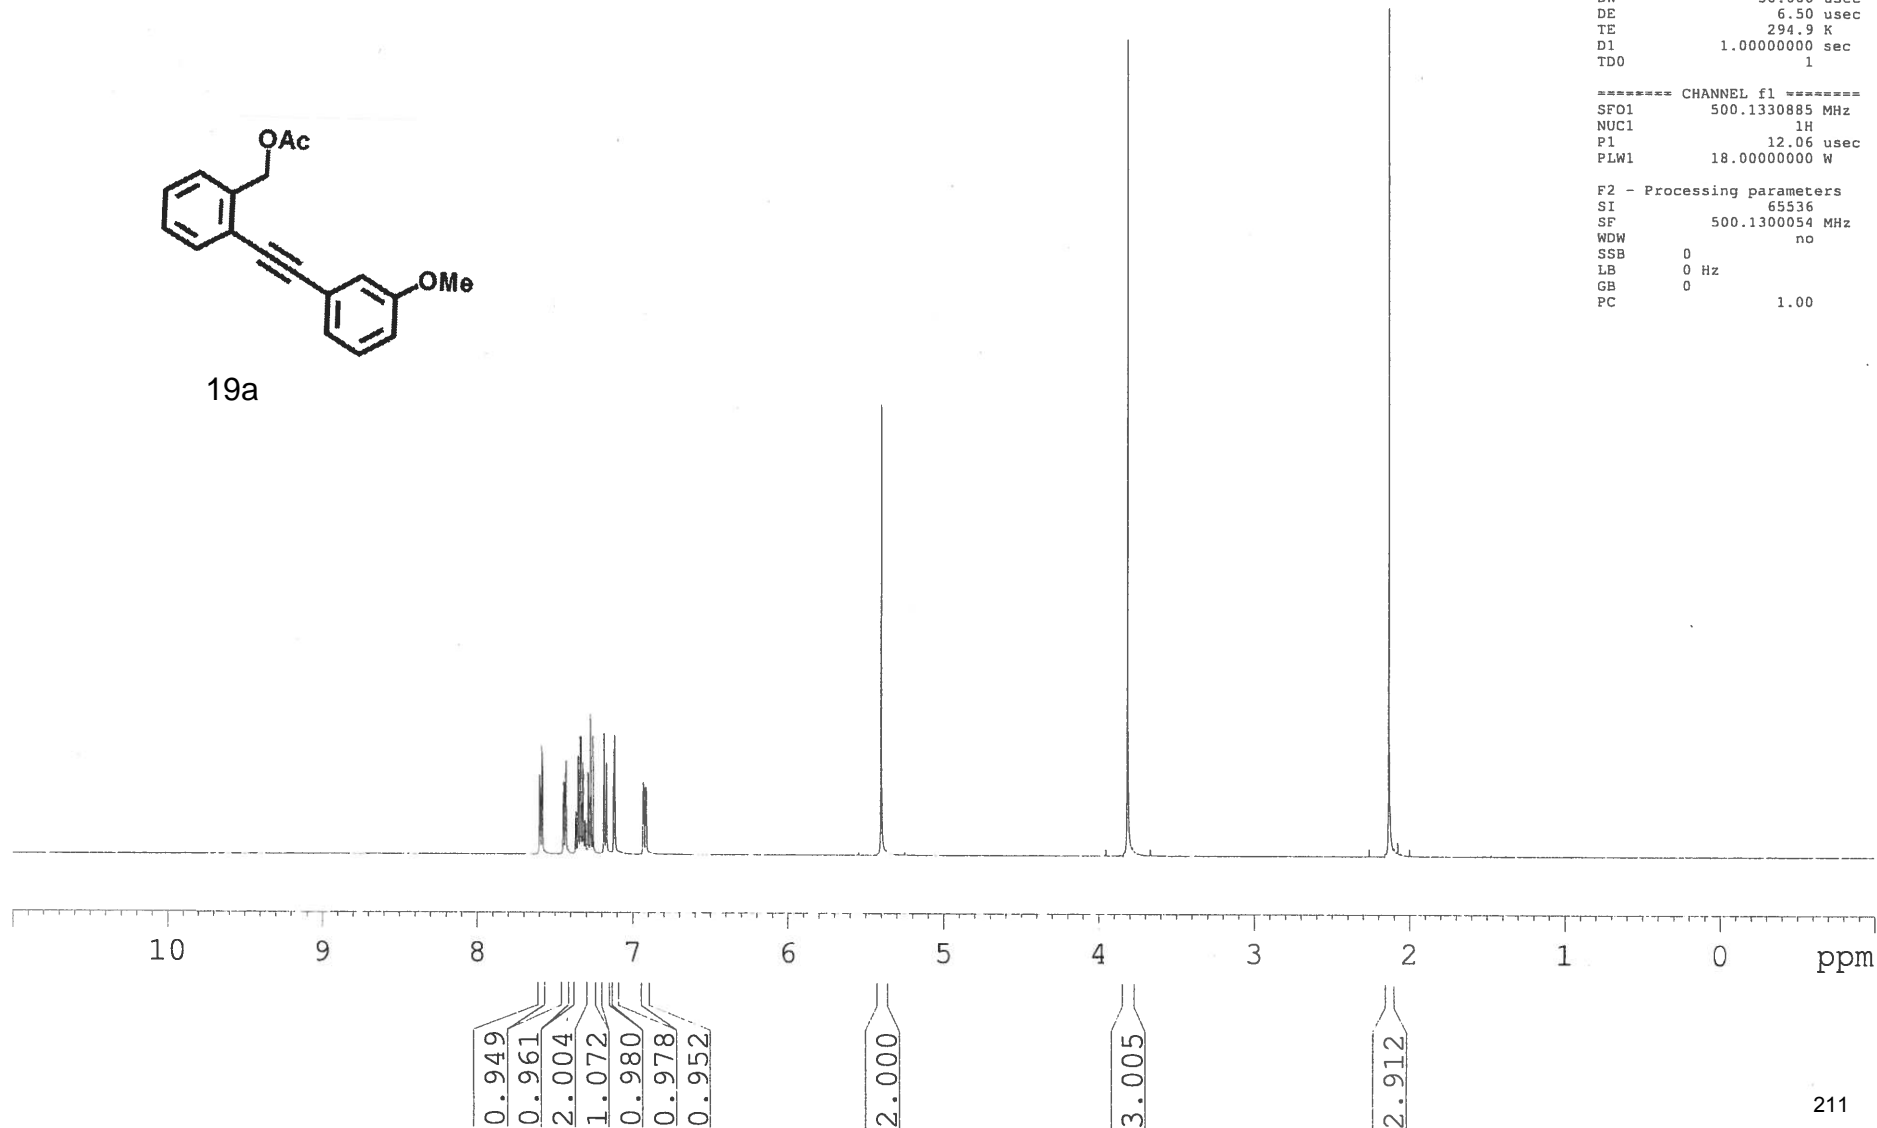

Current Data Parameters  
NAME BenzaldOAc-CC-Anisole  
EXPNO 1  
PROCNO 1

F2 - Acquisition Parameters  
Date\_ 20130617  
Time 20.17  
INSTRUM spect  
PROBHD 5 mm PABBO BB/  
PULPROG zg30  
TD 65536  
SOLVENT CDCl3  
NS 8  
DS 2  
SWH 10000.000 Hz  
FIDRES 0.152588 Hz  
AQ 3.2767999 sec  
RG 17.29  
DW 50.000 usec  
DE 6.50 usec  
TE 294.9 K  
D1 1.00000000 sec  
TD0 1

===== CHANNEL f1 =====  
SFO1 500.1330885 MHz  
NUC1 1H  
P1 12.06 usec  
PLW1 18.00000000 W

F2 - Processing parameters  
SI 65536  
SF 500.1300054 MHz  
WDW no  
SSB 0  
LB 0 Hz  
GB 0  
PC 1.00

BenzaldeOAc-CC-Anisole 13C  
 Topspin 300 V1.3  
 Experiment 1  
 Saturday 15 June 2013

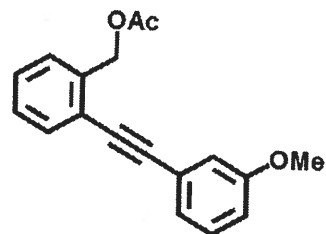

19a

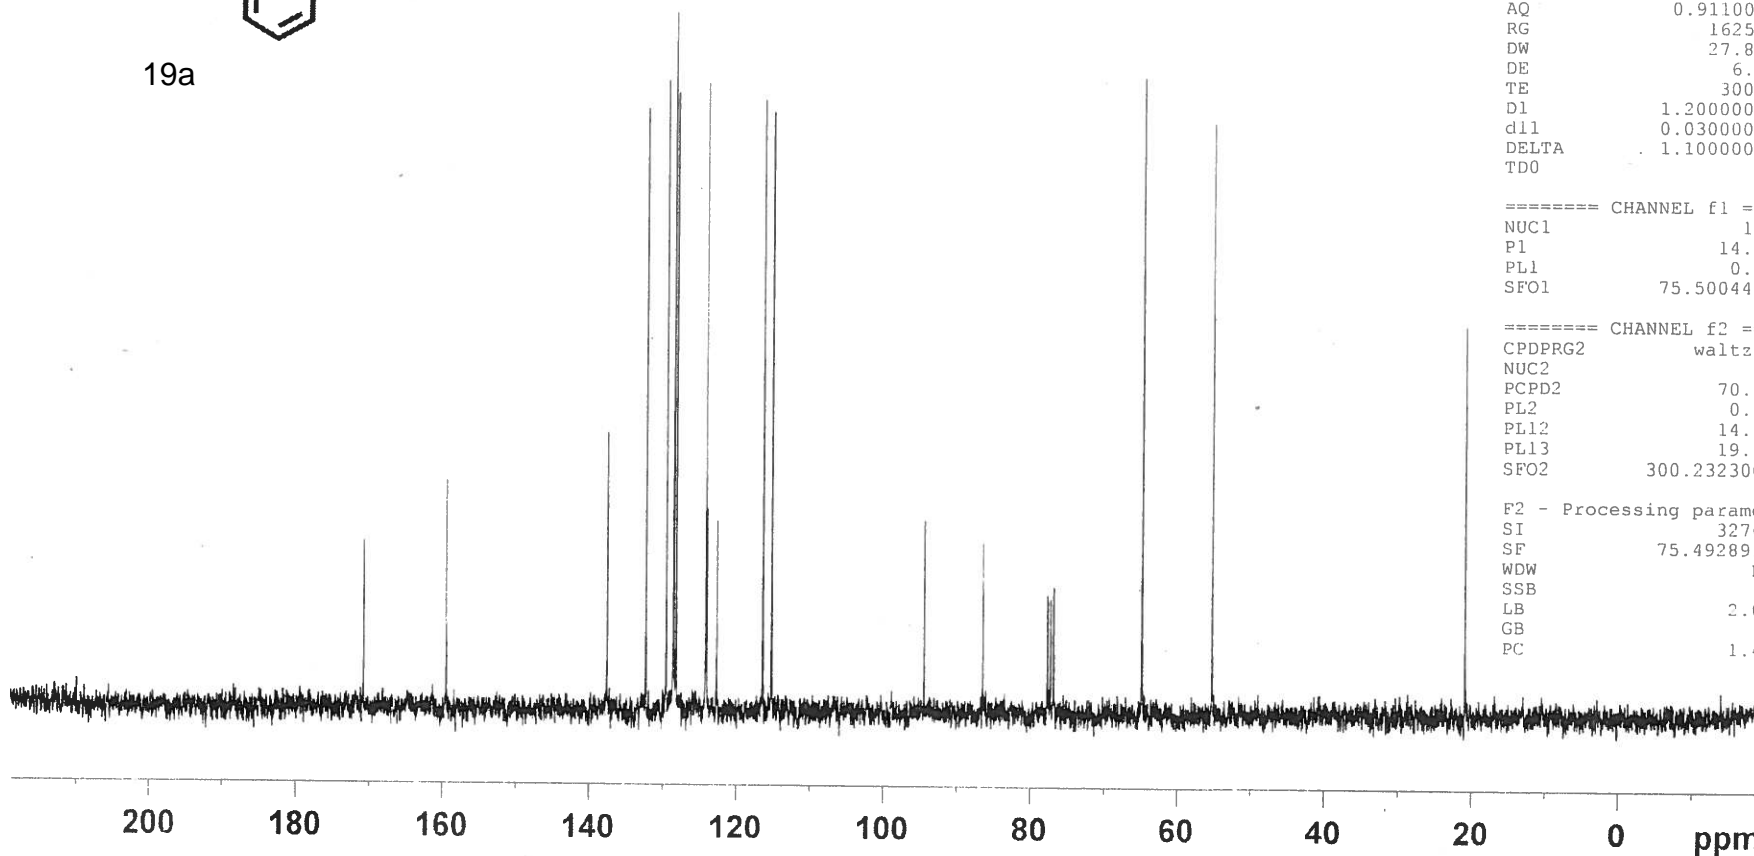

170.78

159.52

128.12

128.57

128.24

124.42

124.05

122.75

116.44

97.45

86.52

55.30

20.96

Current Data Parameters  
 NAME BenzaldeOAc-CC-Anisole 13C  
 EXPNO 1  
 PROCNO 1

F2 - Acquisition Parameters  
 Date\_ 20130615  
 Time\_ 13.04  
 INSTRUM spect  
 PROBHD 5 mm BBO BB-1H  
 PULPROG zgpg30  
 TD 32768  
 SOLVENT CDCl3  
 NS 13  
 DS 4  
 SWH 17985.611 Hz  
 FIDRES 0.548877 Hz  
 AQ 0.9110004 sec  
 RG 1625.5  
 DW 27.800 usec  
 DE 6.00 usec  
 TE 300.0 K  
 D1 1.20000005 sec  
 d11 0.03000000 sec  
 DELTA 1.10000002 sec  
 TD0 1

===== CHANNEL f1 =====  
 NUC1 13C  
 P1 14.00 usec  
 PL1 0.00 dB  
 SFO1 75.5004428 MHz

===== CHANNEL f2 =====  
 CPDPRG2 waltz16  
 NUC2 1H  
 PCPD2 70.00 usec  
 PL2 0.00 dB  
 PL12 14.30 dB  
 PL13 19.31 dB  
 SFO2 300.2323000 MHz

F2 - Processing parameters  
 SI 32768  
 SF 75.4928917 MHz  
 WDW EM  
 SSB 0  
 LB 2.00 Hz  
 GB 0  
 PC 1.40



Benzaldehyde-CC-1,3-Benzene  
 Experiment 1 Topspin 300  
 Wednesday 26 June 2013

Current Data Parameters  
 NAME Benzaldehyde-CC-1,3-Benzene  
 EXPNO 1  
 PROCNO 1

F2 - Acquisition Parameters  
 Date\_ 01/10/2013  
 Time 11.46  
 INSTRUM spect  
 PROBHD 5 mm BBO BB-1H  
 PULPROG zg30  
 TD 32768  
 SOLVENT CDCl3  
 NS 8  
 DS 2  
 SWH 1172.839 Hz  
 FIDRES 0.188380 Hz  
 AQ 0.6542580 sec  
 RG 45.3  
 DW 41.000 usec  
 DE 6.00 usec  
 TE 300.0 K  
 D1 1.00000000 sec  
 TDO 1

===== CHANNEL f1 =====  
 NUC1 1H  
 P1 13.50 usec  
 PL1 0.00 dB  
 SFO1 500.1315011 MHz

F2 - Processing parameters  
 SI 32768  
 SF 500.13150115 MHz  
 WDW EM  
 SSB 0  
 LB 0.02 Hz  
 GB 0  
 PC 1.00

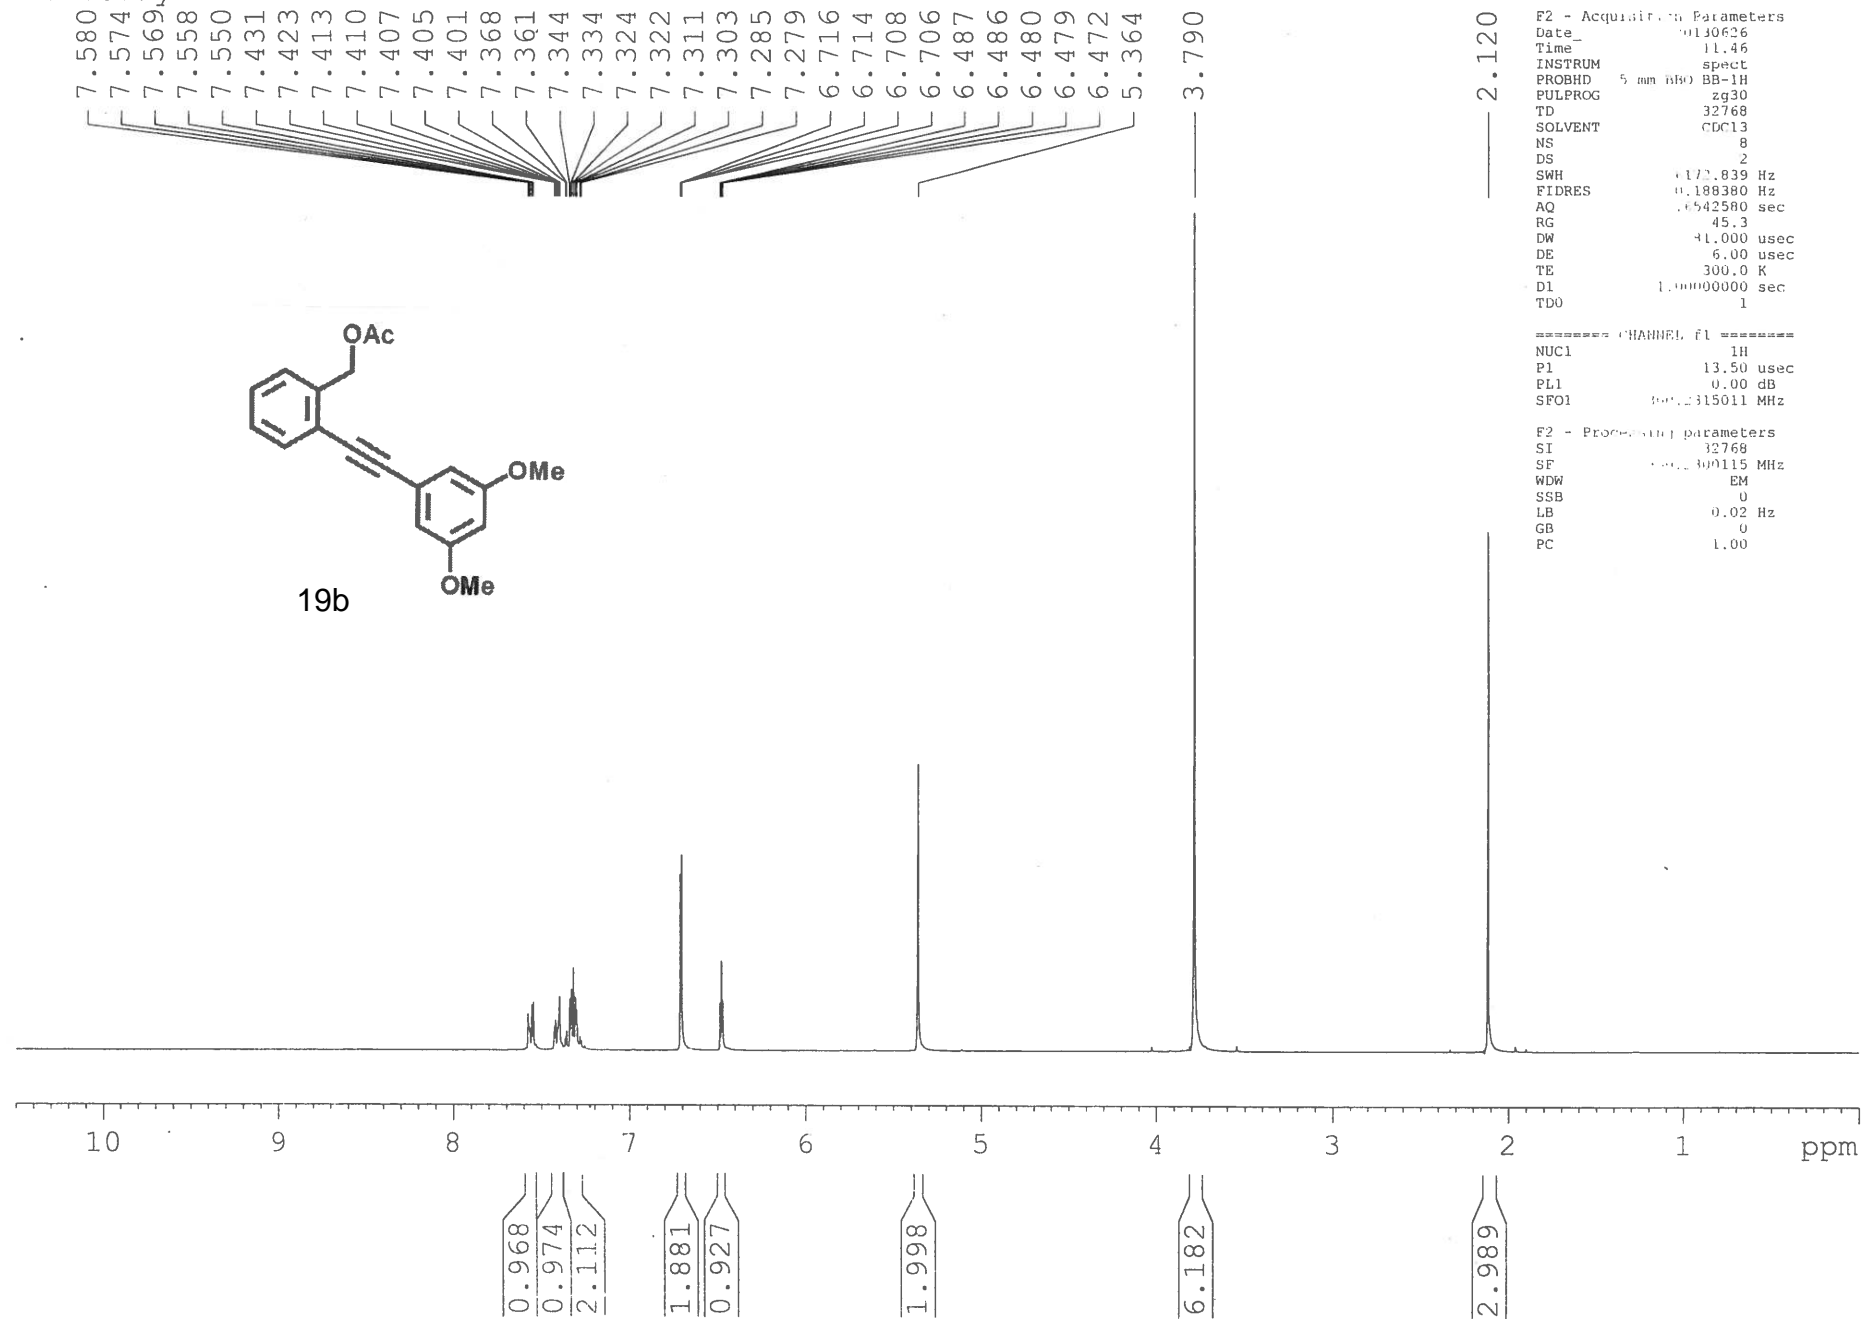

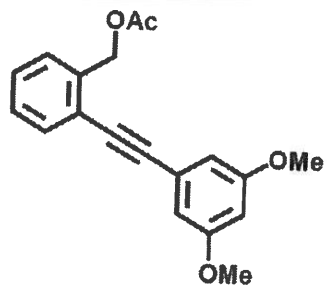

19b

170.81  
160.68  
137.62  
132.34  
128.64  
128.56  
128.23  
124.31  
122.64  
109.38  
102.08  
94.49  
86.20  
64.84  
55.44

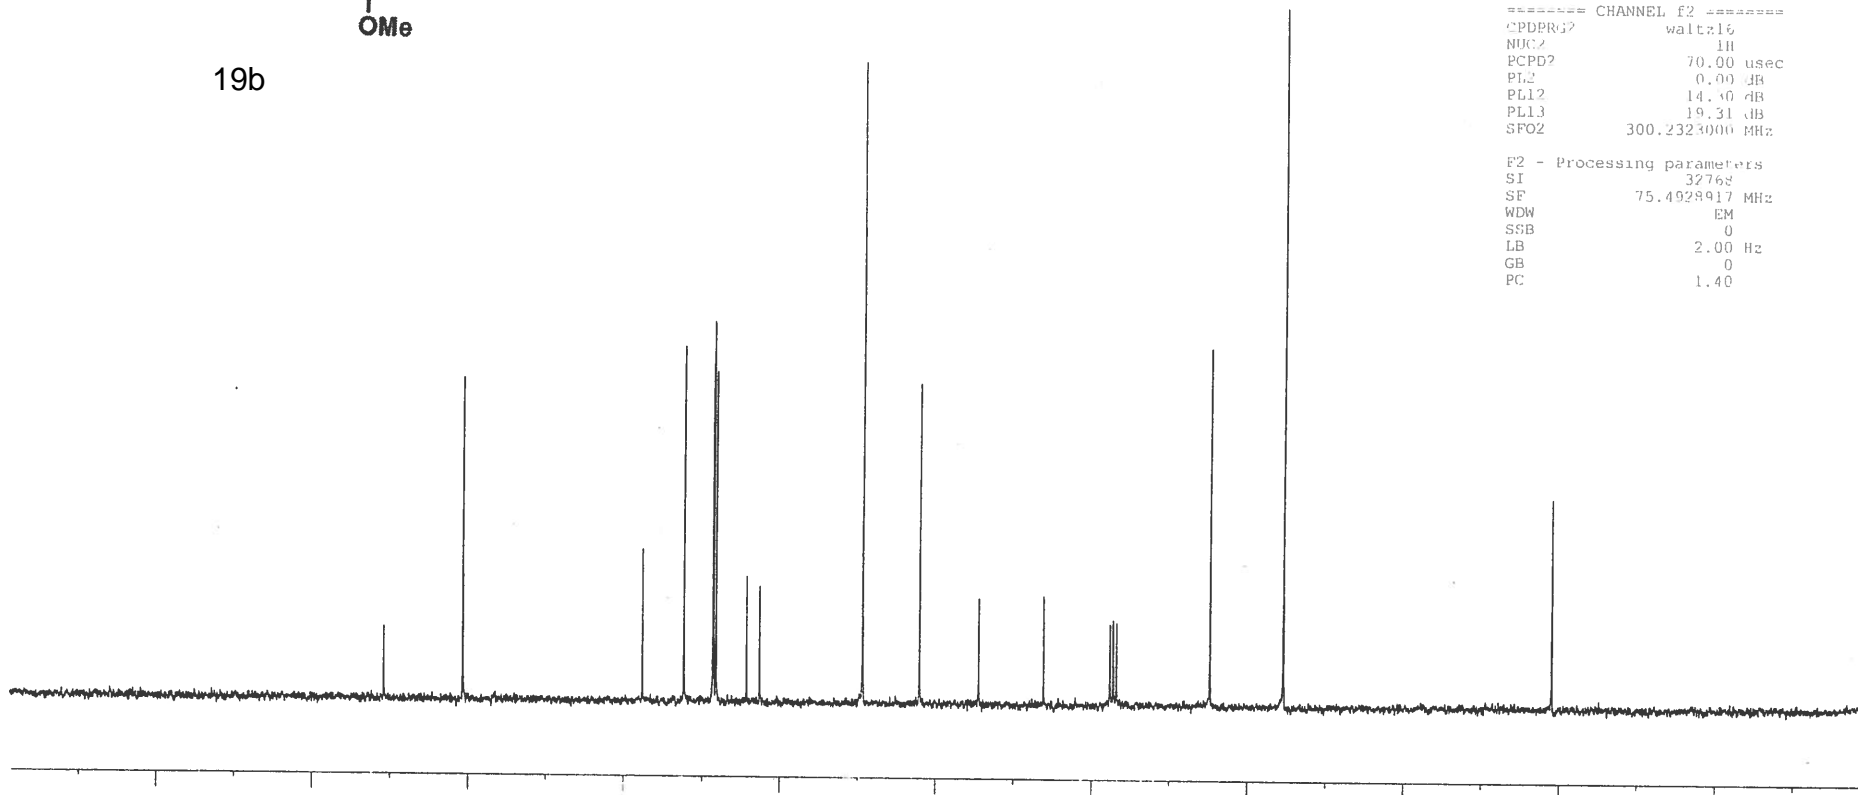

Current Data Parameters  
NAME: Benzaldehyde-CC-1,3-Benzene 13C  
EXPNO: 1  
PROCNO: 1

F2 - Acquisition Parameters  
Date\_: 20130626  
Time\_: 11.56  
INSTRUM: spect  
PROBHD: 5 mm BBO BB-1H  
PULPROG: zgpg30  
TD: 32768  
SOLVENT: CDCl3  
NS: 53  
DS: 4  
SWH: 17985.611 Hz  
FIDRES: 0.548877 Hz  
AQ: 0.9110004 sec  
RG: 2048  
FW: 27.900 usec  
DE: 6.00 usec  
TE: 300.0 K  
D1: 1.2000005 sec  
d11: 0.0300000 sec  
DELTA: 1.1000002 sec  
TD0: 1

===== CHANNEL f1 =====  
NUC1: 13C  
P1: 14.00 usec  
PL1: 0.00 dB  
SFO1: 75.5004428 MHz

===== CHANNEL f2 =====  
CPDPRG2: waltz16  
NUC2: 1H  
PCPD2: 70.00 usec  
PL2: 0.00 dB  
PL12: 14.00 dB  
PL13: 19.31 dB  
SFO2: 300.2323000 MHz

F2 - Processing parameters  
SI: 32768  
SF: 75.4928917 MHz  
WDW: EM  
SSB: 0  
LB: 2.00 Hz  
GB: 0  
PC: 1.40

ThiopheneOAc-1,3-Dimethoxybenzene  
Experiment 1 Topspin 500 V3.2  
Friday 28 June 2013

Current Data Parameters  
NAME ThiopheneOAc-CC-1,3-Dimethoxybenzene  
EXPNO 1  
PROCNO 1

F2 - Acquisition Parameters  
Date\_ 20130628  
Time 13.56  
INSTRUM spect  
PROBHD 5 mm PABBO BB/  
PULPROG zg30  
TD 65536  
SOLVENT CDC13  
NS 8  
DS 2  
SWH 10000.000 Hz  
FIDRES 0.152588 Hz  
AQ 3.2767999 sec  
RG 70.71  
DW 50.000 usec  
DE 6.50 usec  
TE 294.8 K  
D1 1.00000000 sec  
TD0 1

===== CHANNEL f1 =====  
SFO1 500.1330885 MHz  
NUC1 1H  
P1 12.06 usec  
PLW1 18.00000000 W

F2 - Processing parameters  
SI 65536  
SF 500.1300053 MHz  
WDW EM  
SSB 0  
LB 1.00 Hz  
GB 0  
PC 1.00

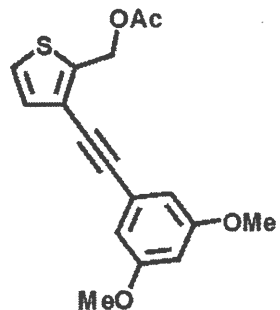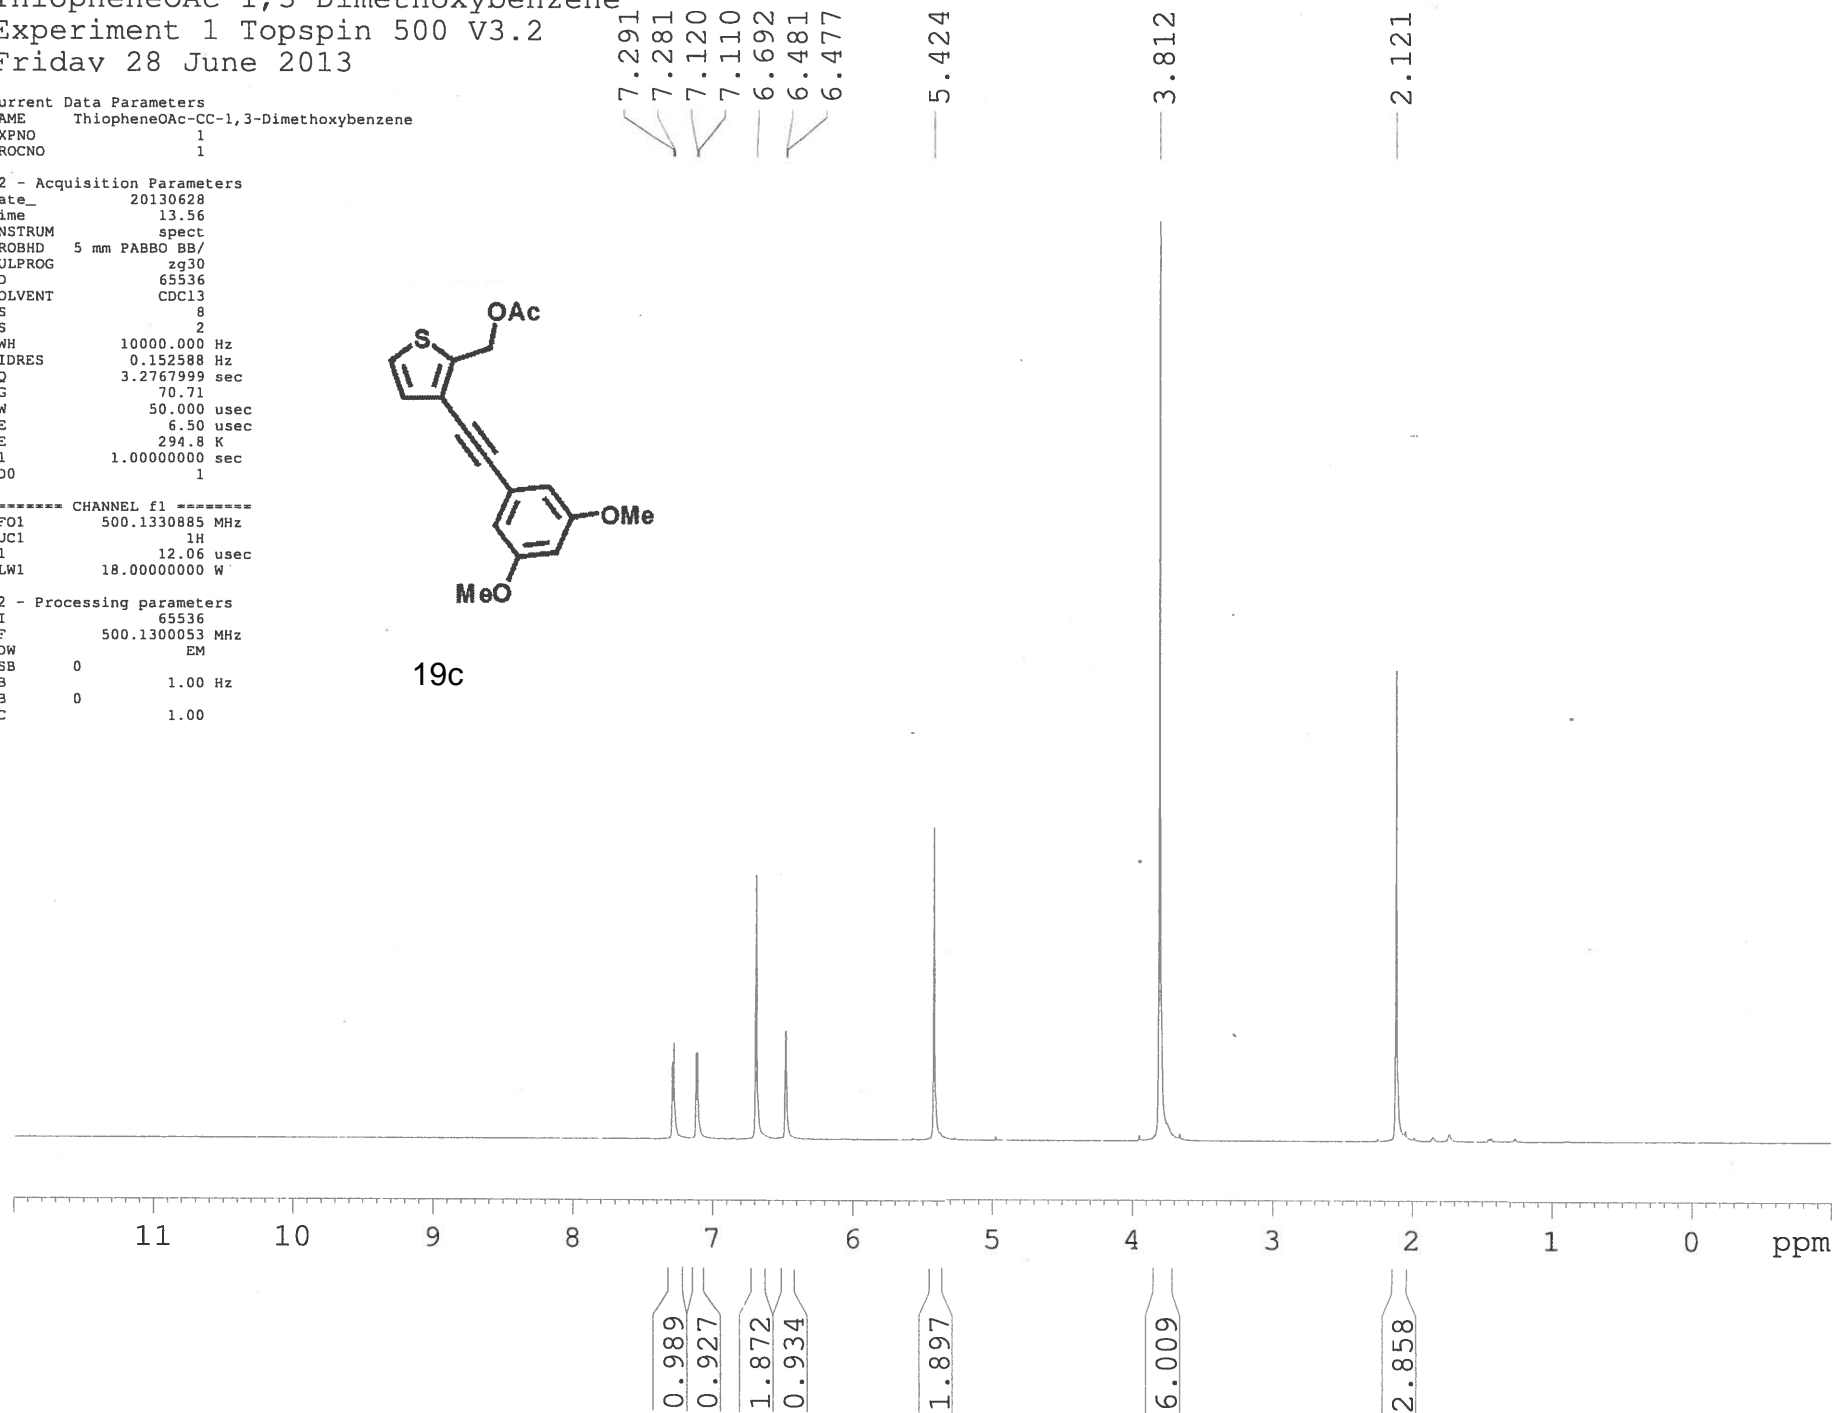

ThiopheneOAc-CC-1,3-Dimethoxybenzene  
 Topspin 500 V3.2 Experiment 1  
 Friday 28 June 2013

— 170.718 — 160.580 — 140.512 — 129.664 — 125.784 — 124.196 — 122.356 — 109.330 — 101.945 — 92.924 — 82.257 — 77.346 — 77.092 — 76.838 — 59.403 — 55.451 — 20.895

Current Data Parameters  
 NAME ThiopheneOAc-CC-1,3-Dimethoxybenzene 13C  
 EXPNO 1  
 PROCNO 1

F2 - Acquisition Parameters  
 Date\_ 20130628  
 Time 14.03  
 INSTRUM spect  
 PROBHD 5 mm PABBO BB/  
 PULPROG zgpg30  
 TD 65536  
 SOLVENT CDCl3  
 NS 63  
 DS 4  
 SWH 29761.904 Hz  
 FIDRES 0.454131 Hz  
 AQ 1.1010048 sec  
 RG 203.82  
 DW 16.800 usec  
 DE 6.50 usec  
 TE 295.0 K  
 D1 2.00000000 sec  
 D11 0.03000000 sec  
 TD0 1

===== CHANNEL f1 =====  
 SFO1 125.7703637 MHz  
 NUC1 13C  
 P1 9.50 usec  
 PLW1 66.48200226 W

===== CHANNEL f2 =====  
 SFO2 500.1320005 MHz  
 NUC2 1H  
 CPDPRG[2] waltz16  
 PCPD2 80.00 usec  
 PLW2 12.234000021 W  
 PLW12 0.28826001 W  
 PLW13 0.18449000 W

F2 - Processing parameters  
 SI 32768  
 SF 125.7577890 MHz  
 WDW EM  
 SSB 0  
 LB 1.00 Hz  
 GB 0  
 PC 1.40

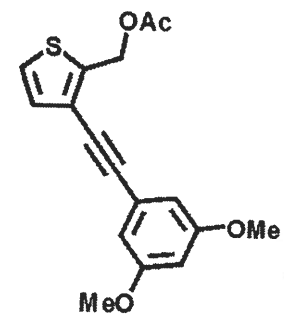

19c

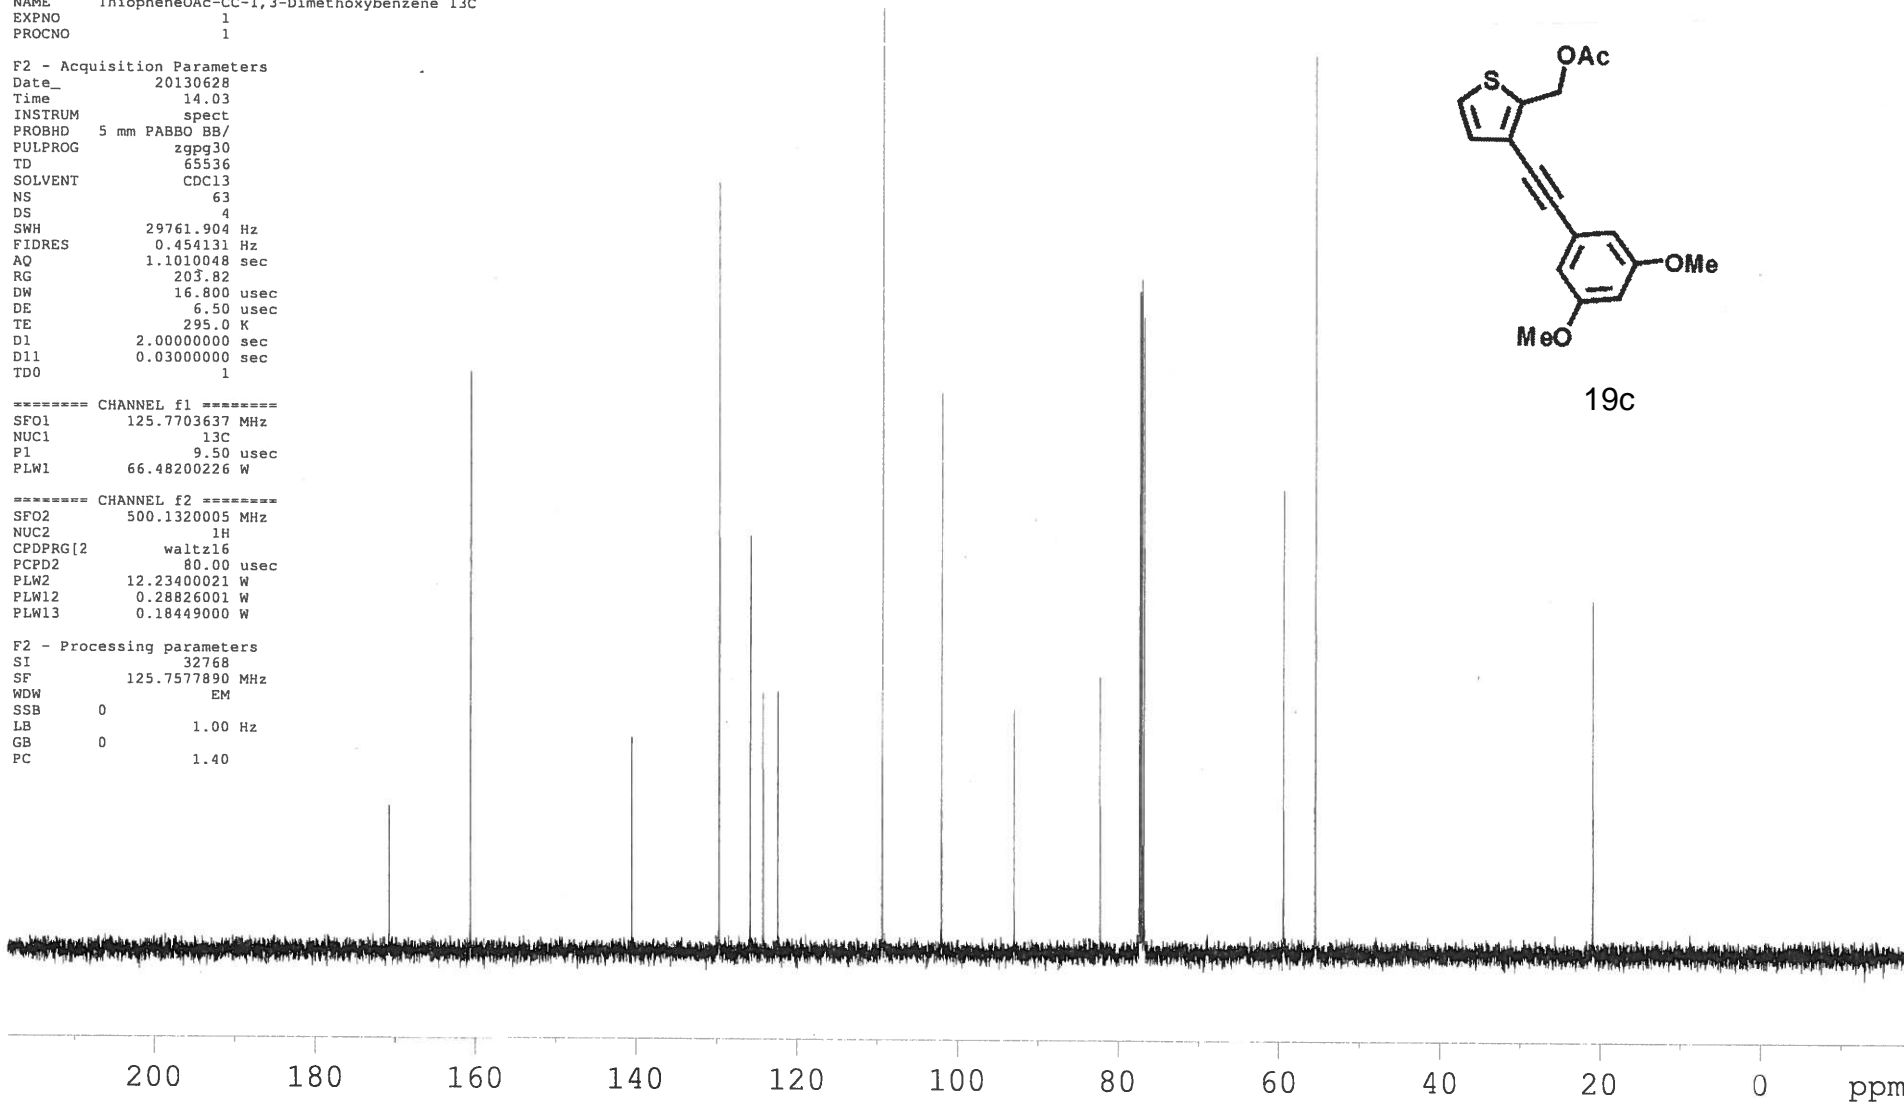

Dimethoxy-1,3-CC-FuranOAc-5  
 Topspin 500 3.1  
 Experiment 1  
 Monday 25 March 2012

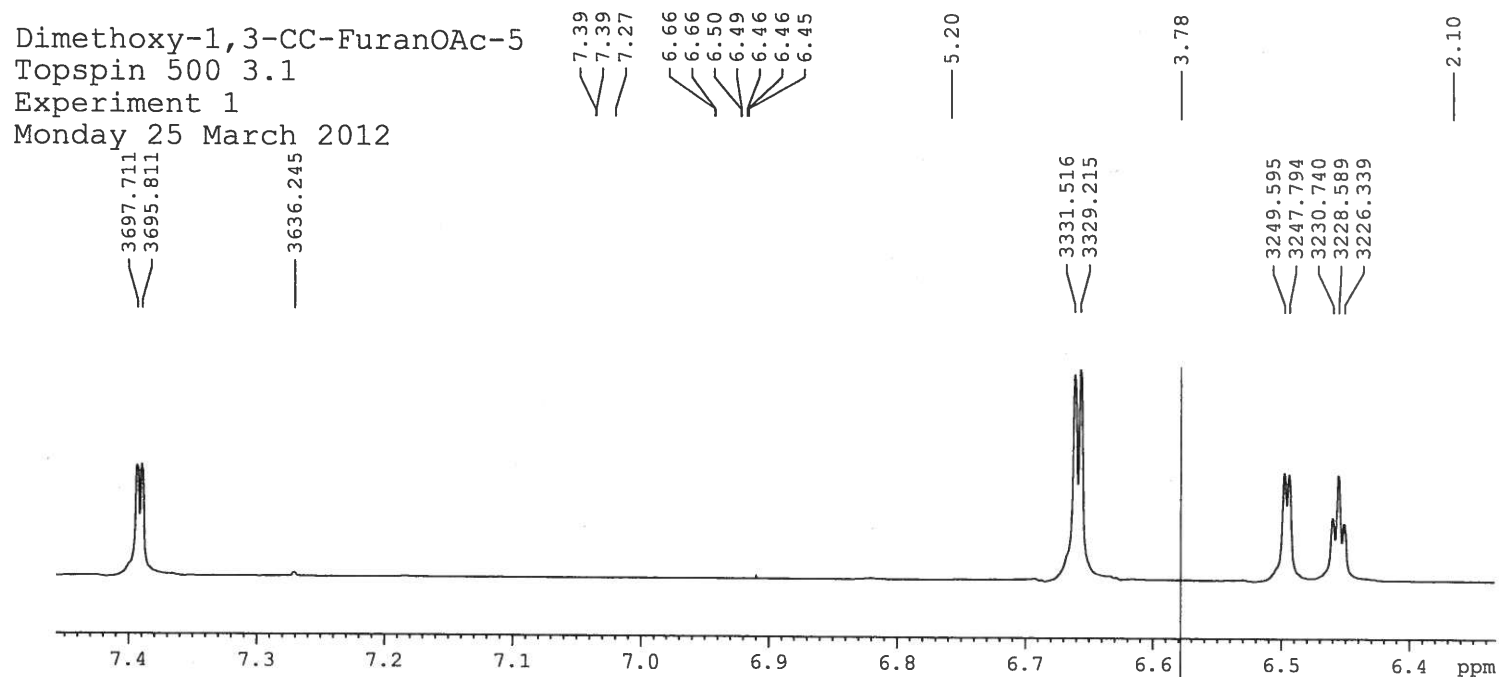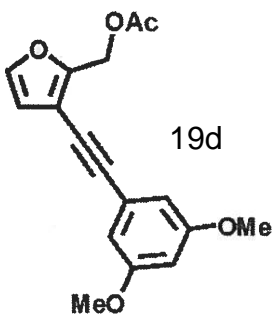

Current Data Parameters  
 NAME Dimethoxy-1,3-CC-FuranOAc-5  
 EXPNO 1  
 PROCNO 1

F2 - Acquisition Parameters  
 Date\_ 20130325  
 Time 20.24  
 INSTRUM spect  
 PROBH 5 mm PABBO BB/  
 PULPROG zg30  
 TD 65536  
 SOLVENT CDCl3  
 NS 8  
 DS 2  
 SWH 10000.000 Hz  
 FIDRES 0.152588 Hz  
 AQ 3.2767999 sec  
 RG 27.82  
 DW 50.000 usec  
 DE 6.50 usec  
 TE 293.0 K  
 D1 1.00000000 sec  
 TD0 1

===== CHANNEL f1 =====  
 SFO1 500.1330885 MHz  
 NUC1 1H  
 P1 15.80 usec  
 PLW1 12.23400021 W

F2 - Processing parameters  
 SI 65536  
 SF 500.1300077 MHz  
 WDW EM  
 SSB 0  
 LB 0.40 Hz  
 GB 0  
 PC 1.00

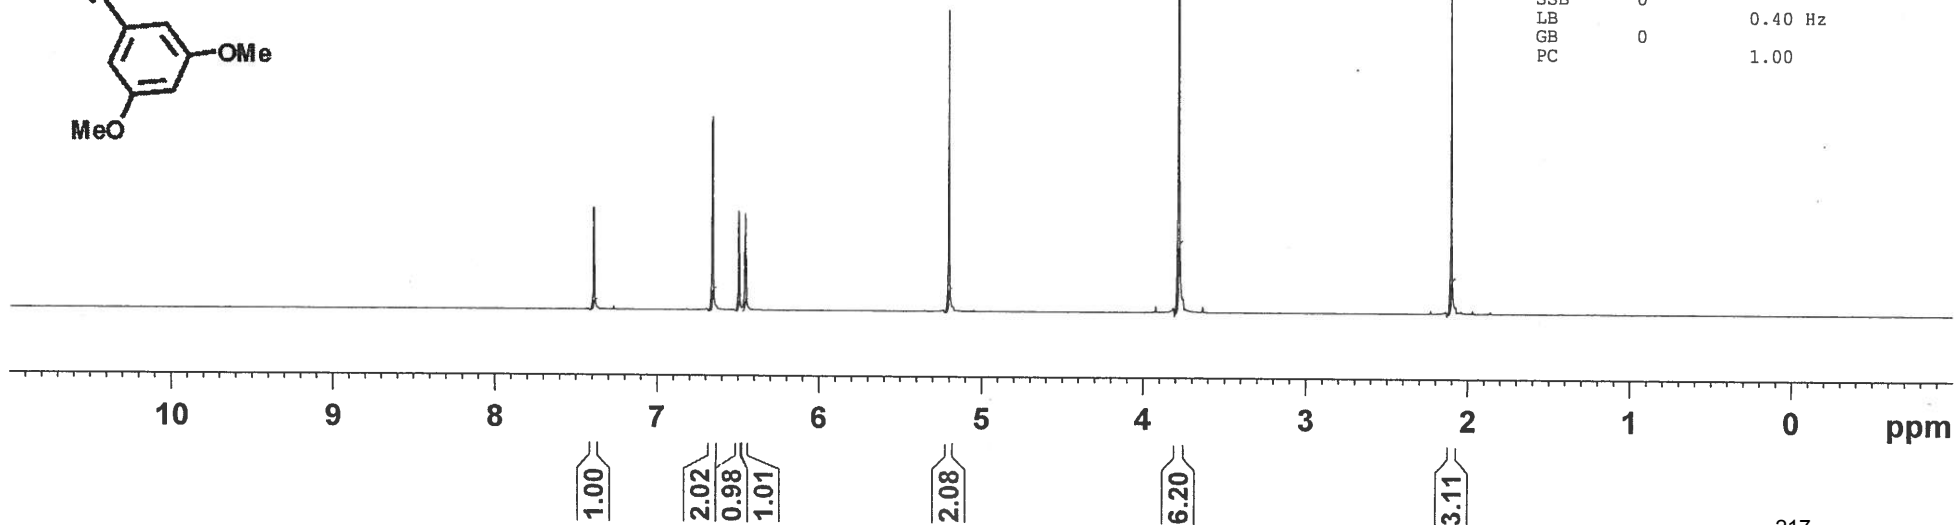

dimethoxy-1,3-CC-FuranOAc-5 13C  
 spin 500 3.1  
 experiment 1  
 day 25 March 2013

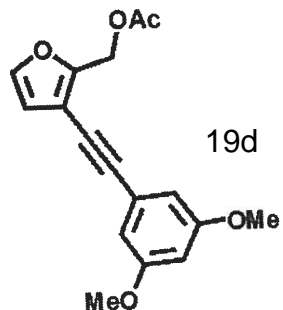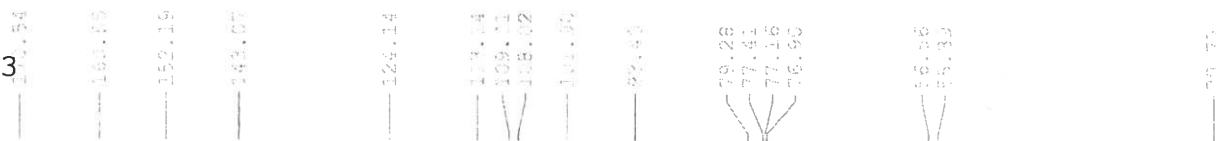

Current Data Parameters  
 NAME Dimethoxy-1,3-CC-FuranOAc-5 13C  
 EXPNO 1  
 PROCNO 1

F2 - Acquisition Parameters  
 Date\_ 20130325  
 Time\_ 20.38  
 INSTRUM spect  
 PROBHD 5 mm PABBO BB/  
 PULPROG zgpg30  
 TD 65536  
 SOLVENT CDC13  
 NS 13  
 DS 4  
 SWH 29761.904 Hz  
 FIDRES 0.454131 Hz  
 AQ 1.1010048 sec  
 RG 203.82  
 DW 16.800 usec  
 DE 6.50 usec  
 TE 293.3 K  
 D1 2.00000000 sec  
 D11 0.03000000 sec  
 TD0 1

===== CHANNEL f1 =====  
 SFO1 125.7703637 MHz  
 NUC1 13C  
 P1 9.50 usec  
 PLW1 66.48200226 W

===== CHANNEL f2 =====  
 SFO2 500.1320005 MHz  
 NUC2 1H  
 CPDPRG[2] waltz16  
 PCPD2 80.00 usec  
 PLW2 12.23400021 W  
 PLW12 0.47720000 W  
 PLW13 0.30541000 W

F2 - Processing parameters  
 SI 32768  
 SF 125.7577890 MHz  
 WDW EM  
 SSB 0  
 LB 1.00 Hz  
 GB 0  
 PC 1.40

200 180 160 140 120 100 80 60 40 20 0 ppm 218

BenzaldOAc-CC-Anisole Co<sub>2</sub>(CO)<sub>6</sub>

Experiment 1

Topspin 500 V3.2

Tuesday June 20 2013

7.438  
7.435  
7.424  
7.423  
7.421  
7.401  
7.399  
7.386  
7.384  
7.372  
7.369  
7.366  
7.354  
7.351  
7.339  
7.337  
7.316  
7.301  
7.300  
7.284  
7.271  
7.270  
7.081  
7.079  
7.078  
7.076  
7.066  
7.064  
7.063  
7.061  
7.020  
7.017  
7.015  
7.012  
6.919  
6.918  
6.914  
6.913  
6.903  
6.901  
6.898  
6.896  
5.133  
3.828  
2.036

7.680  
7.678  
7.677  
7.666  
7.662

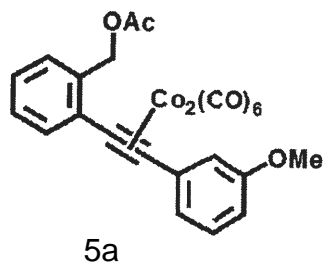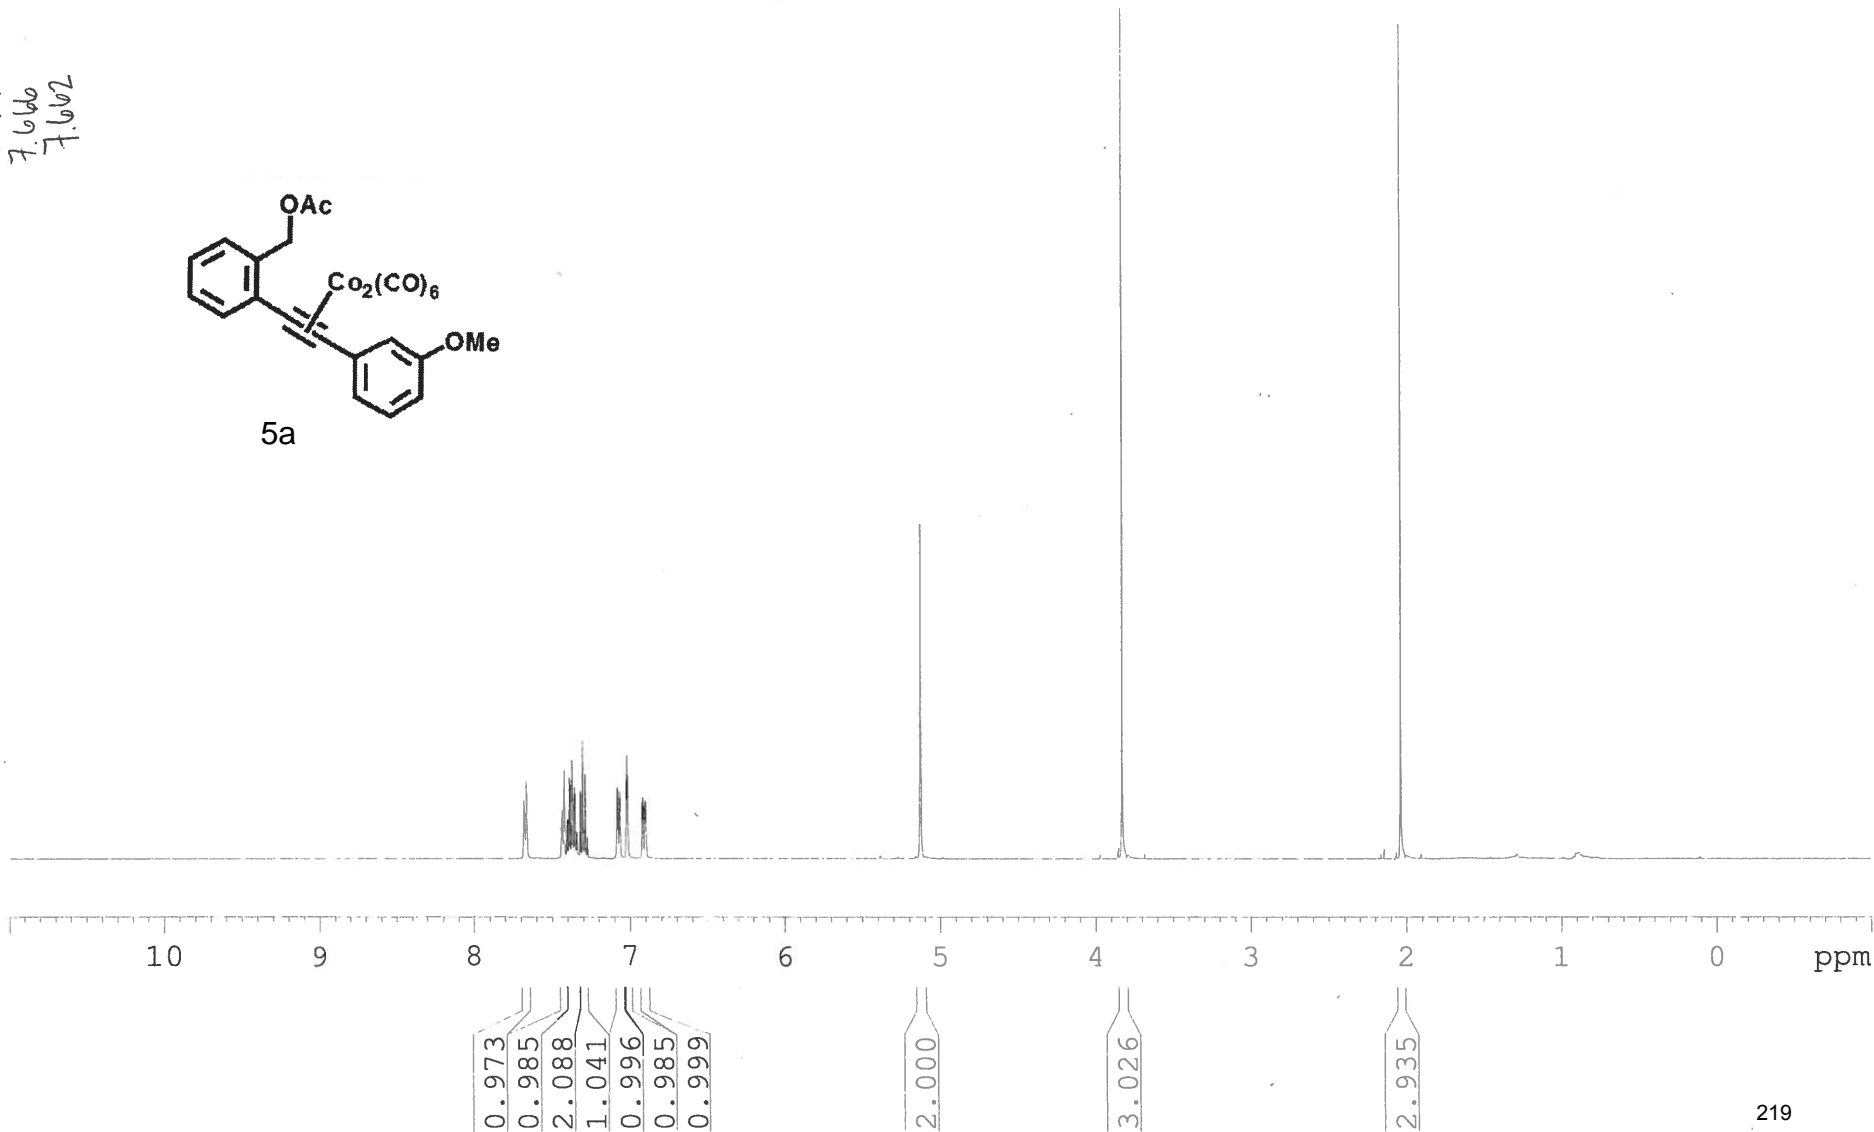

BenzaldOAc-CC-Anisole Co<sub>2</sub>(CO)<sub>6</sub> 13C  
 Topspin 500 V3.2  
 Tuesday 18 June 2013

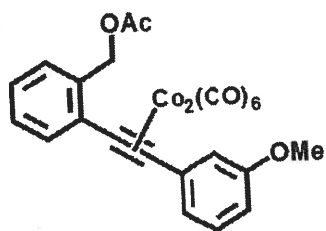

5a

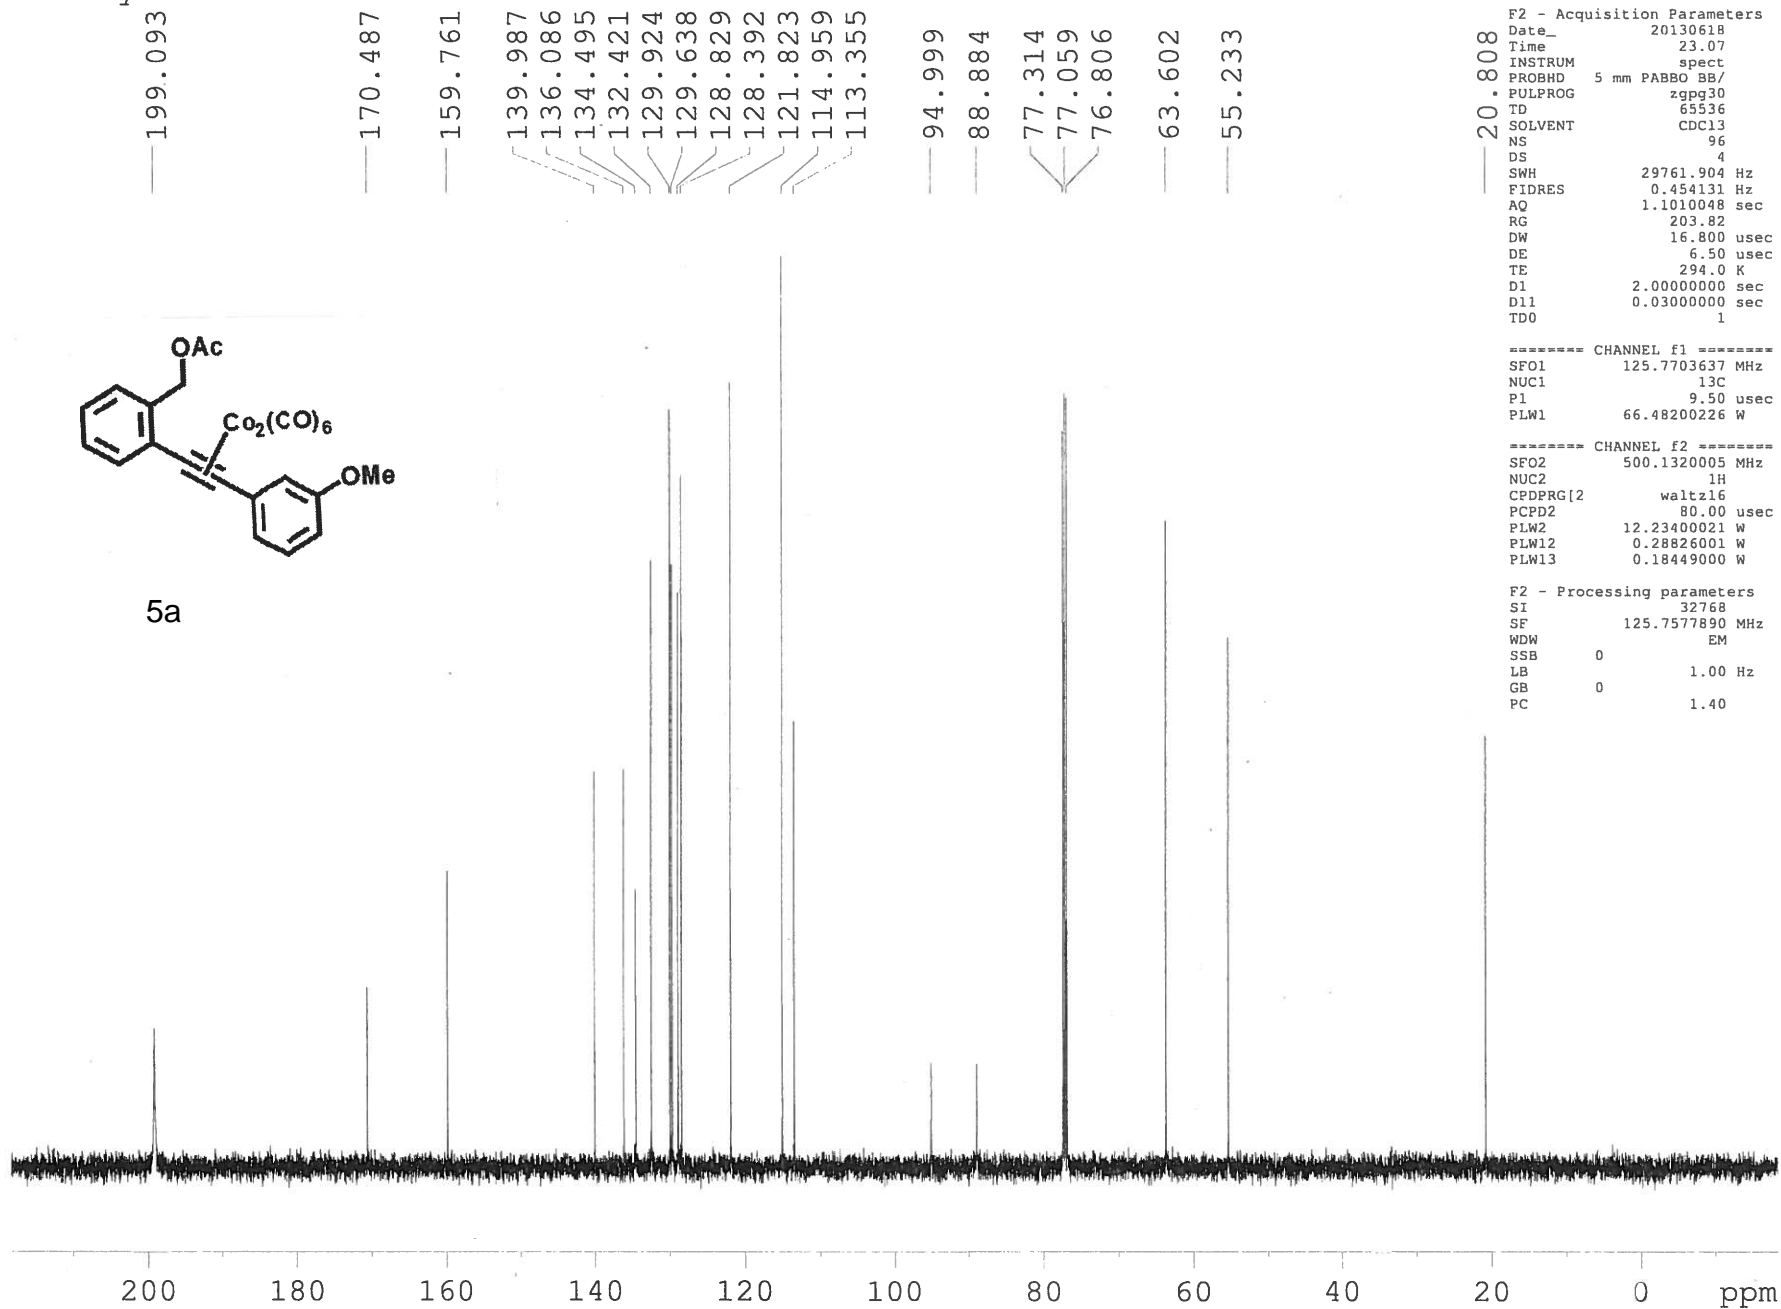

Current Data Parameters  
 NAME BenzaldOAc-CC-Anisole Co<sub>2</sub>(CO)<sub>6</sub> 13C  
 EXPNO 1  
 PROCNO 1

F2 - Acquisition Parameters  
 Date\_ 20130618  
 Time 23.07  
 INSTRUM spect  
 PROBHD 5 mm PABBO BB/  
 PULPROG zgpg30  
 TD 65536  
 SOLVENT CDCl<sub>3</sub>  
 NS 96  
 DS 4  
 SWH 29761.904 Hz  
 FIDRES 0.454131 Hz  
 AQ 1.1010048 sec  
 RG 203.82  
 DW 16.800 usec  
 DE 6.50 usec  
 TE 294.0 K  
 D1 2.00000000 sec  
 D11 0.03000000 sec  
 TD0 1

===== CHANNEL f1 =====  
 SFO1 125.7703637 MHz  
 NUC1 13C  
 P1 9.50 usec  
 PLW1 66.48200226 W

===== CHANNEL f2 =====  
 SFO2 500.1320005 MHz  
 NUC2 1H  
 CPDPRG2 waltz16  
 PCPD2 80.00 usec  
 PLW2 12.23400021 W  
 PLW12 0.28826001 W  
 PLW13 0.18449000 W

F2 - Processing parameters  
 SI 32768  
 SF 125.7577890 MHz  
 WDW EM  
 SSB 0  
 LB 1.00 Hz  
 GB 0  
 PC 1.40



BenzalOAc-CC-1,3-dimethoxybenzene Co<sub>2</sub>(CO)<sub>6</sub>  
 Experiment 1 Topspin 500 V3.2  
 Thursday 27 June 2013

7.682  
 7.679  
 7.678  
 7.667  
 7.663  
 7.434  
 7.431  
 7.420  
 7.419  
 7.416  
 7.415  
 7.395  
 7.392  
 7.381  
 7.378  
 7.366  
 7.363  
 7.360  
 7.349  
 7.345  
 7.334  
 7.330  
 7.270  
 6.634  
 6.630  
 6.476  
 6.472  
 6.467  
 5.157  
 3.801

—2.046

Current Data Parameters  
 NAME BenzalOAc-CC-1,3-dimethoxybenzene Co<sub>2</sub>(CO)<sub>6</sub>  
 EXPNO 1  
 PROCNO 1

F2 - Acquisition Parameters  
 Date\_ 20130627  
 Time 15.34  
 INSTRUM spect  
 PROBHD 5 mm PABBO BB/  
 PULPROG zg30  
 TD 65536  
 SOLVENT CDC13  
 NS 8  
 DS 2  
 SWH 10000.000 Hz  
 FIDRES 0.152588 Hz  
 AQ 3.2767999 sec  
 RG 43.34  
 DW 50.000 usec  
 DE 6.50 usec  
 TE 296.4 K  
 D1 1.0000000 sec  
 TD0 1

===== CHANNEL f1 =====  
 SFO1 500.1330885 MHz  
 NUC1 1H  
 P1 12.06 usec  
 PLW1 18.00000000 W

F2 - Processing parameters  
 SI 65536  
 SF 500.1300065 MHz  
 WDW no  
 SSB 0  
 LB 0 Hz  
 GB 0  
 PC 1.00

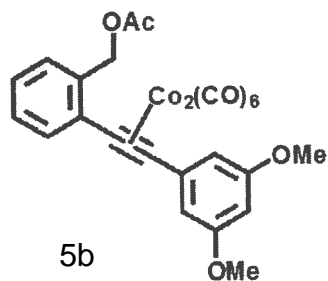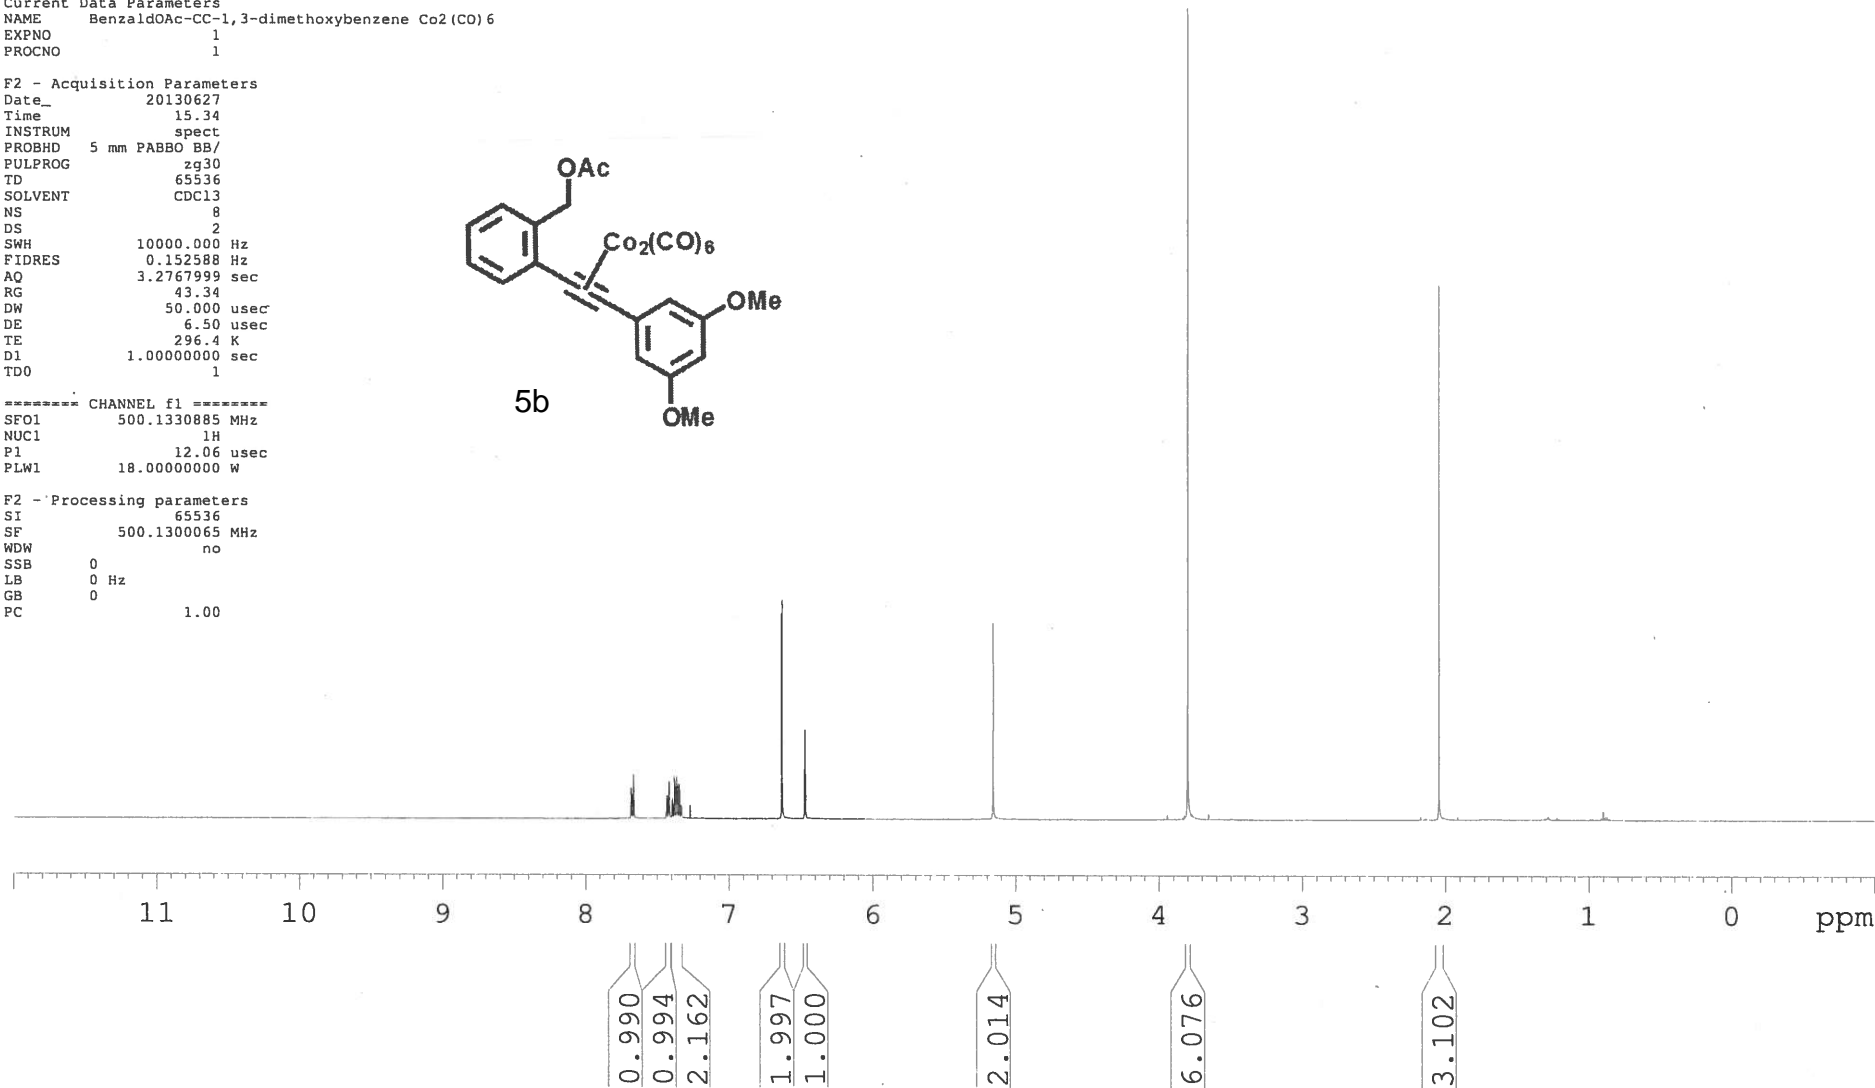

BenzaldeOAc-CC-1,3-Benzene Co<sub>2</sub>(CO)<sub>6</sub> <sup>13</sup>C  
 Topspin 300  
 Experiment 1  
 Thursday 27 June 2013

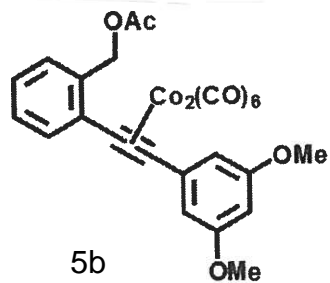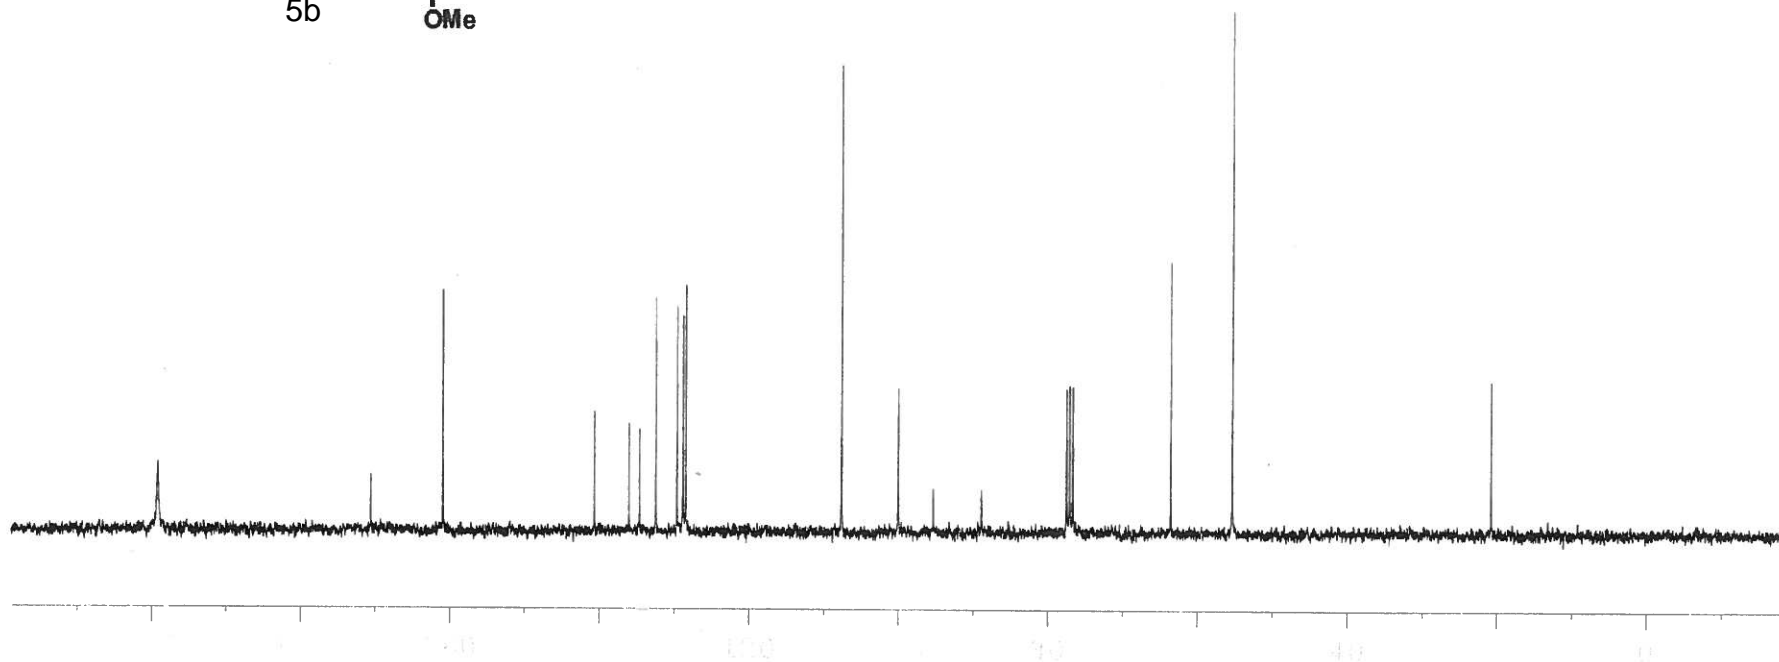

```

Current Data Parameters
NAME      BenzaldeOAc-CC-1,3-Benzene Co2(CO)6 13C
EXPNO     1
PROCNO    1

F2 - Acquisition Parameters
Date_     20130627
Time      17.52
INSTRUM   spect
PROBHD    5 mm BBO BB-1H
PULPROG   zgpg30
TD        32768
SOLVENT   CDCl3
NS        104
DS        4
SWH        17985.611 Hz
FIDRES     0.548877 Hz
AQ         0.9110004 sec
RG         2048
DW         27.800 usec
DE         6.00 usec
TE        300.0 K
D1         1.20000005 sec
d11        0.03000000 sec
DELTA      1.10000002 sec
TDO        1

===== CHANNEL f1 =====
NUC1       13C
P1         14.00 usec
PL1        0.00 dB
SFO1       75.5004428 MHz

===== CHANNEL f2 =====
CPDPRG2    waltz16
NUC2       1H
PCPD2      70.00 usec
PL2        0.00 dB
PL12       14.30 dB
PL13       19.31 dB
SFO2       300.2323900 MHz

F2 - Processing parameters
SI         32768
SF         75.4528917 MHz
WDW        EM
SSB        0
LB         2.00 Hz
GB         0
PC         1.40
  
```

ThiopheneOAc-1,3-Dime  
Experiment 1 Topspin  
Tuesday 02 July 2013

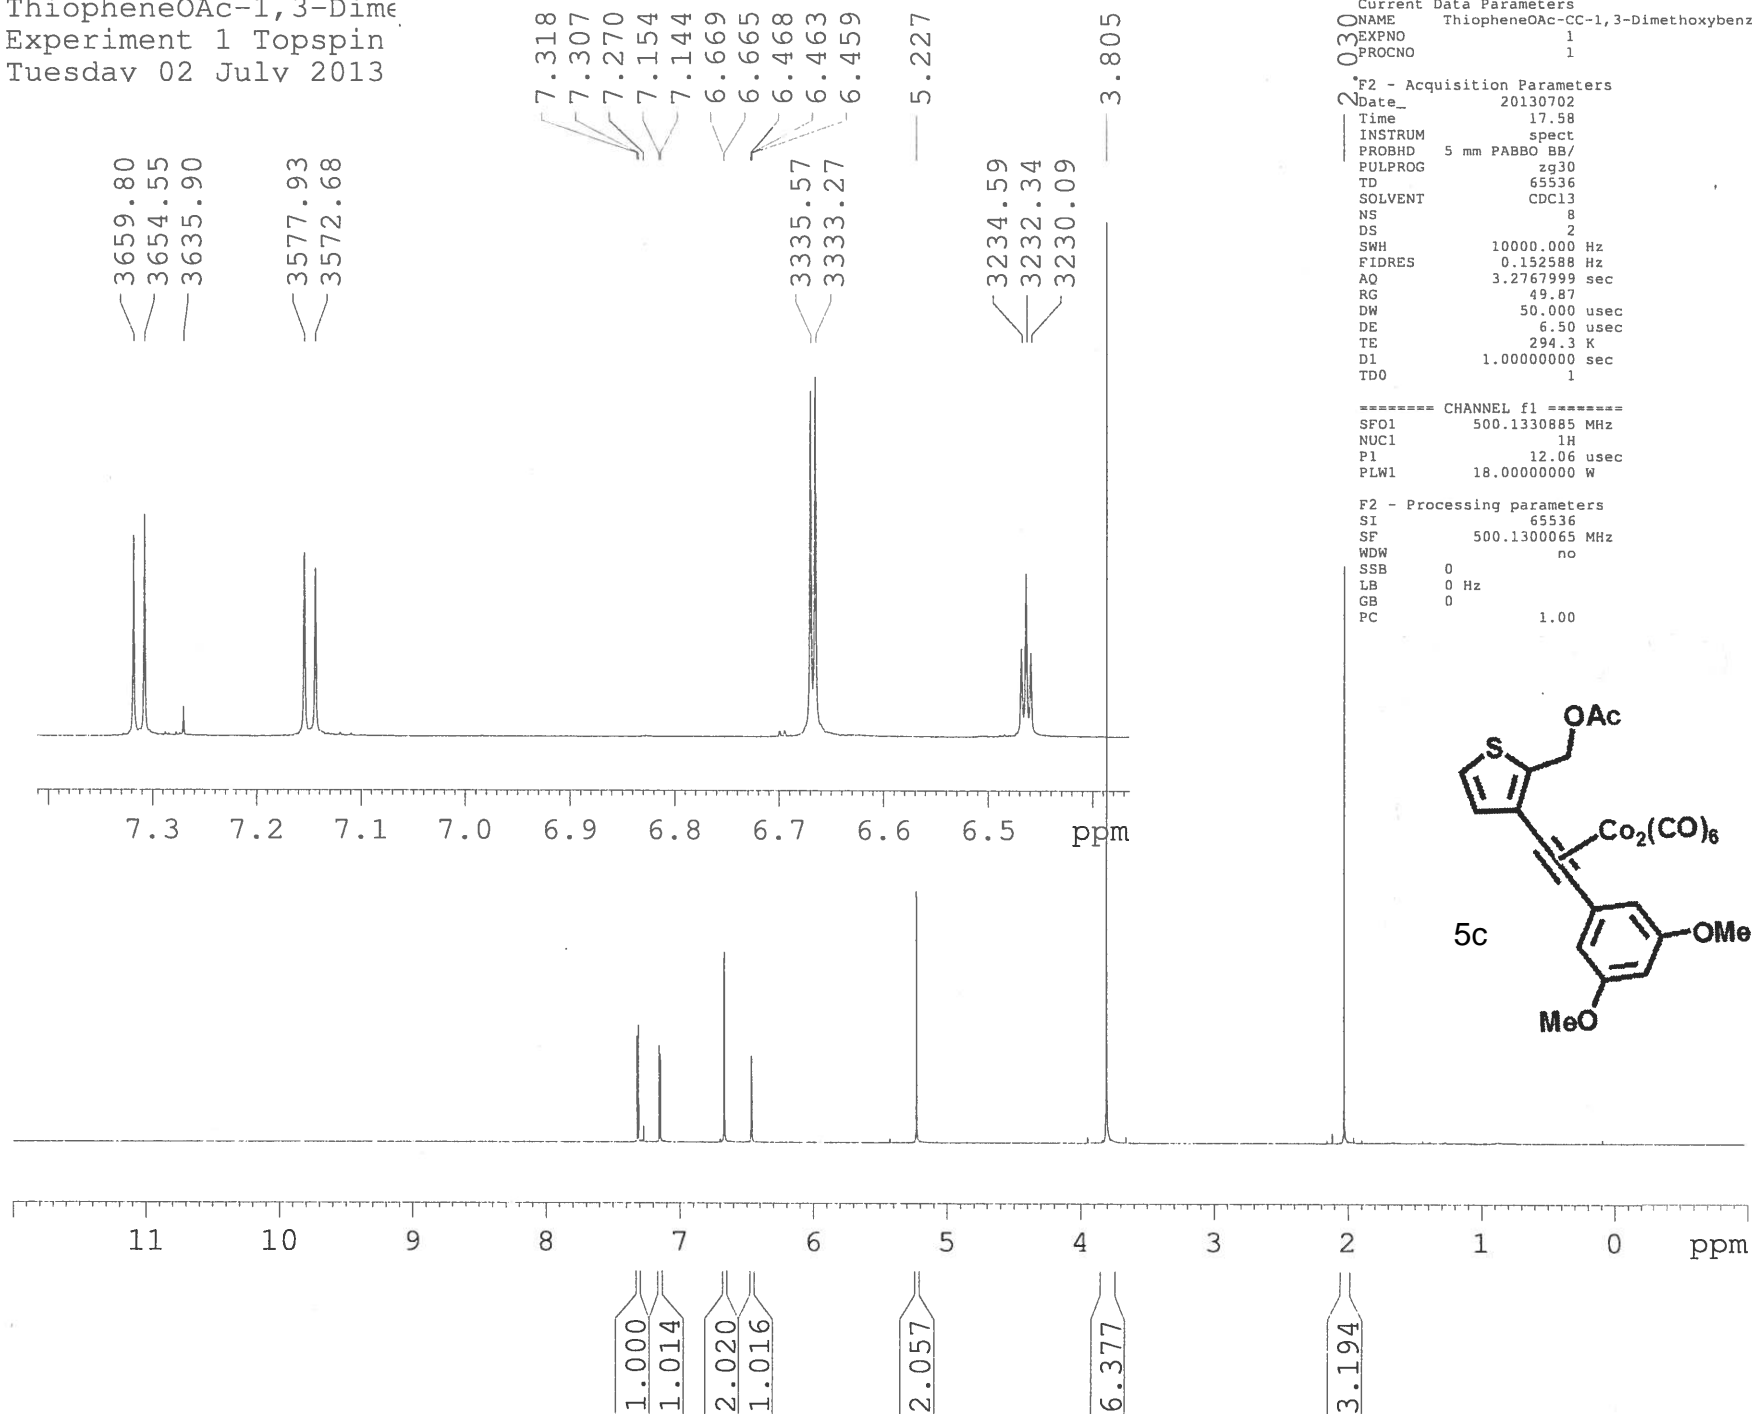

Current Data Parameters  
NAME ThiopheneOAc-CC-1,3-Dimethoxybenzene Co2(CO)6  
EXPNO 1  
PROCNO 1

F2 - Acquisition Parameters  
Date\_ 20130702  
Time 17.58  
INSTRUM spect  
PROBHD 5 mm PABBO BB/  
PULPROG zg30  
TD 65536  
SOLVENT CDCl3  
NS 8  
DS 2  
SWH 10000.000 Hz  
FIDRES 0.152588 Hz  
AQ 3.2767999 sec  
RG 49.87  
DW 50.000 usec  
DE 6.50 usec  
TE 294.3 K  
D1 1.00000000 sec  
TD0 1

----- CHANNEL f1 -----  
SF01 500.1330885 MHz  
NUC1 1H  
P1 12.06 usec  
PLW1 18.00000000 W

F2 - Processing parameters  
SI 65536  
SF 500.1300065 MHz  
WDW no  
SSB 0  
LB 0 Hz  
GB 0  
PC 1.00

ThiopheneOAc-CC-1,3-Dimethoxybenzene Co<sub>2</sub>(CO)<sub>6</sub>  
 Experiment 1 Topspin 500 V3.2  
 Tuesday 02 July 2013

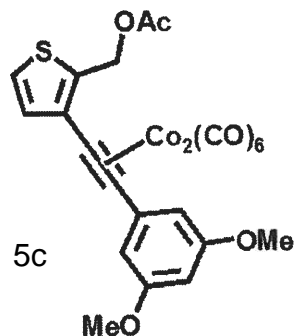

— 199.016

— 170.520

— 160.878

— 140.323

— 136.513

— 134.912

— 130.539

— 126.072

— 107.492

— 99.935

— 93.267

— 82.351

— 77.316

— 77.061

— 76.807

— 58.589

— 55.340

— 20.654

Current Data Parameters  
 NAME ThiopheneOAc-CC-1,3-Dimethoxybenzene Co<sub>2</sub>(CO)<sub>6</sub> 13C  
 EXPNO 1  
 PROCNO 1

F2 - Acquisition Parameters  
 Date\_ 20130702  
 Time 18.06  
 INSTRUM spect  
 PROBHD 5 mm PABBO BB/  
 PULPROG zgpg30  
 TD 65536  
 SOLVENT CDCl<sub>3</sub>  
 NS 107  
 DS 4  
 SWH 29761.904 Hz  
 FIDRES 0.454131 Hz  
 AQ 1.1010048 sec  
 RG 203.82  
 DW 16.800 usec  
 DE 6.50 usec  
 TE 294.4 K  
 D1 2.00000000 sec  
 D11 0.03000000 sec  
 TDO 1

===== CHANNEL f1 =====  
 SFO1 125.7703637 MHz  
 NUC1 13C  
 P1 9.50 usec  
 PLW1 66.48200226 W

===== CHANNEL f2 =====  
 SFO2 500.1320005 MHz  
 NUC2 1H  
 CPDPRG[2] waltz16  
 PCPD2 80.00 usec  
 PLW2 12.23400021 W  
 PLW12 0.28826001 W  
 PLW13 0.18449000 W

F2 - Processing parameters  
 SI 32768  
 SF 125.7577890 MHz  
 WDW EM  
 SSB 0  
 LB 1.00 Hz  
 GB 0  
 PC 1.40

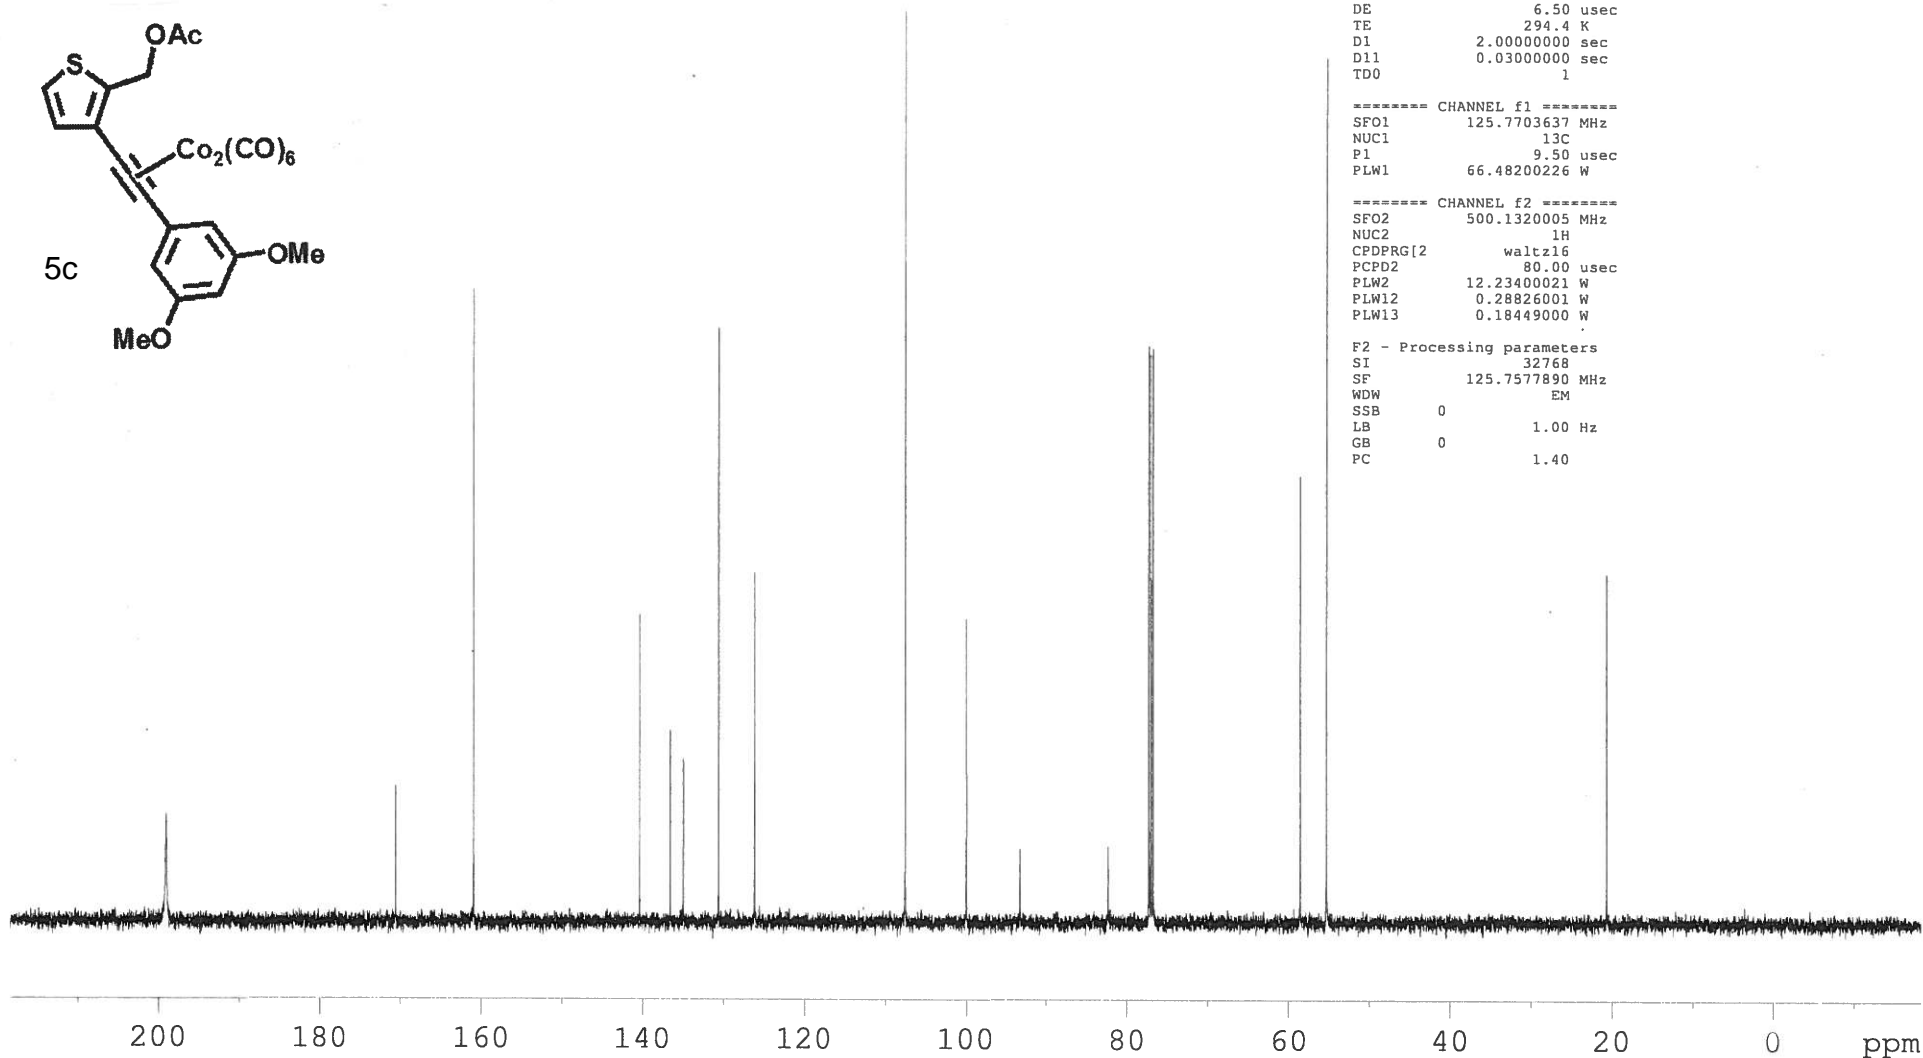

Dimethoxy-1,3-CC-FuranOAc-5 Co<sub>2</sub>(CO)<sub>6</sub>  
 Topspin 500 3.2  
 Experiment 1  
 Thursday 11 April 2013

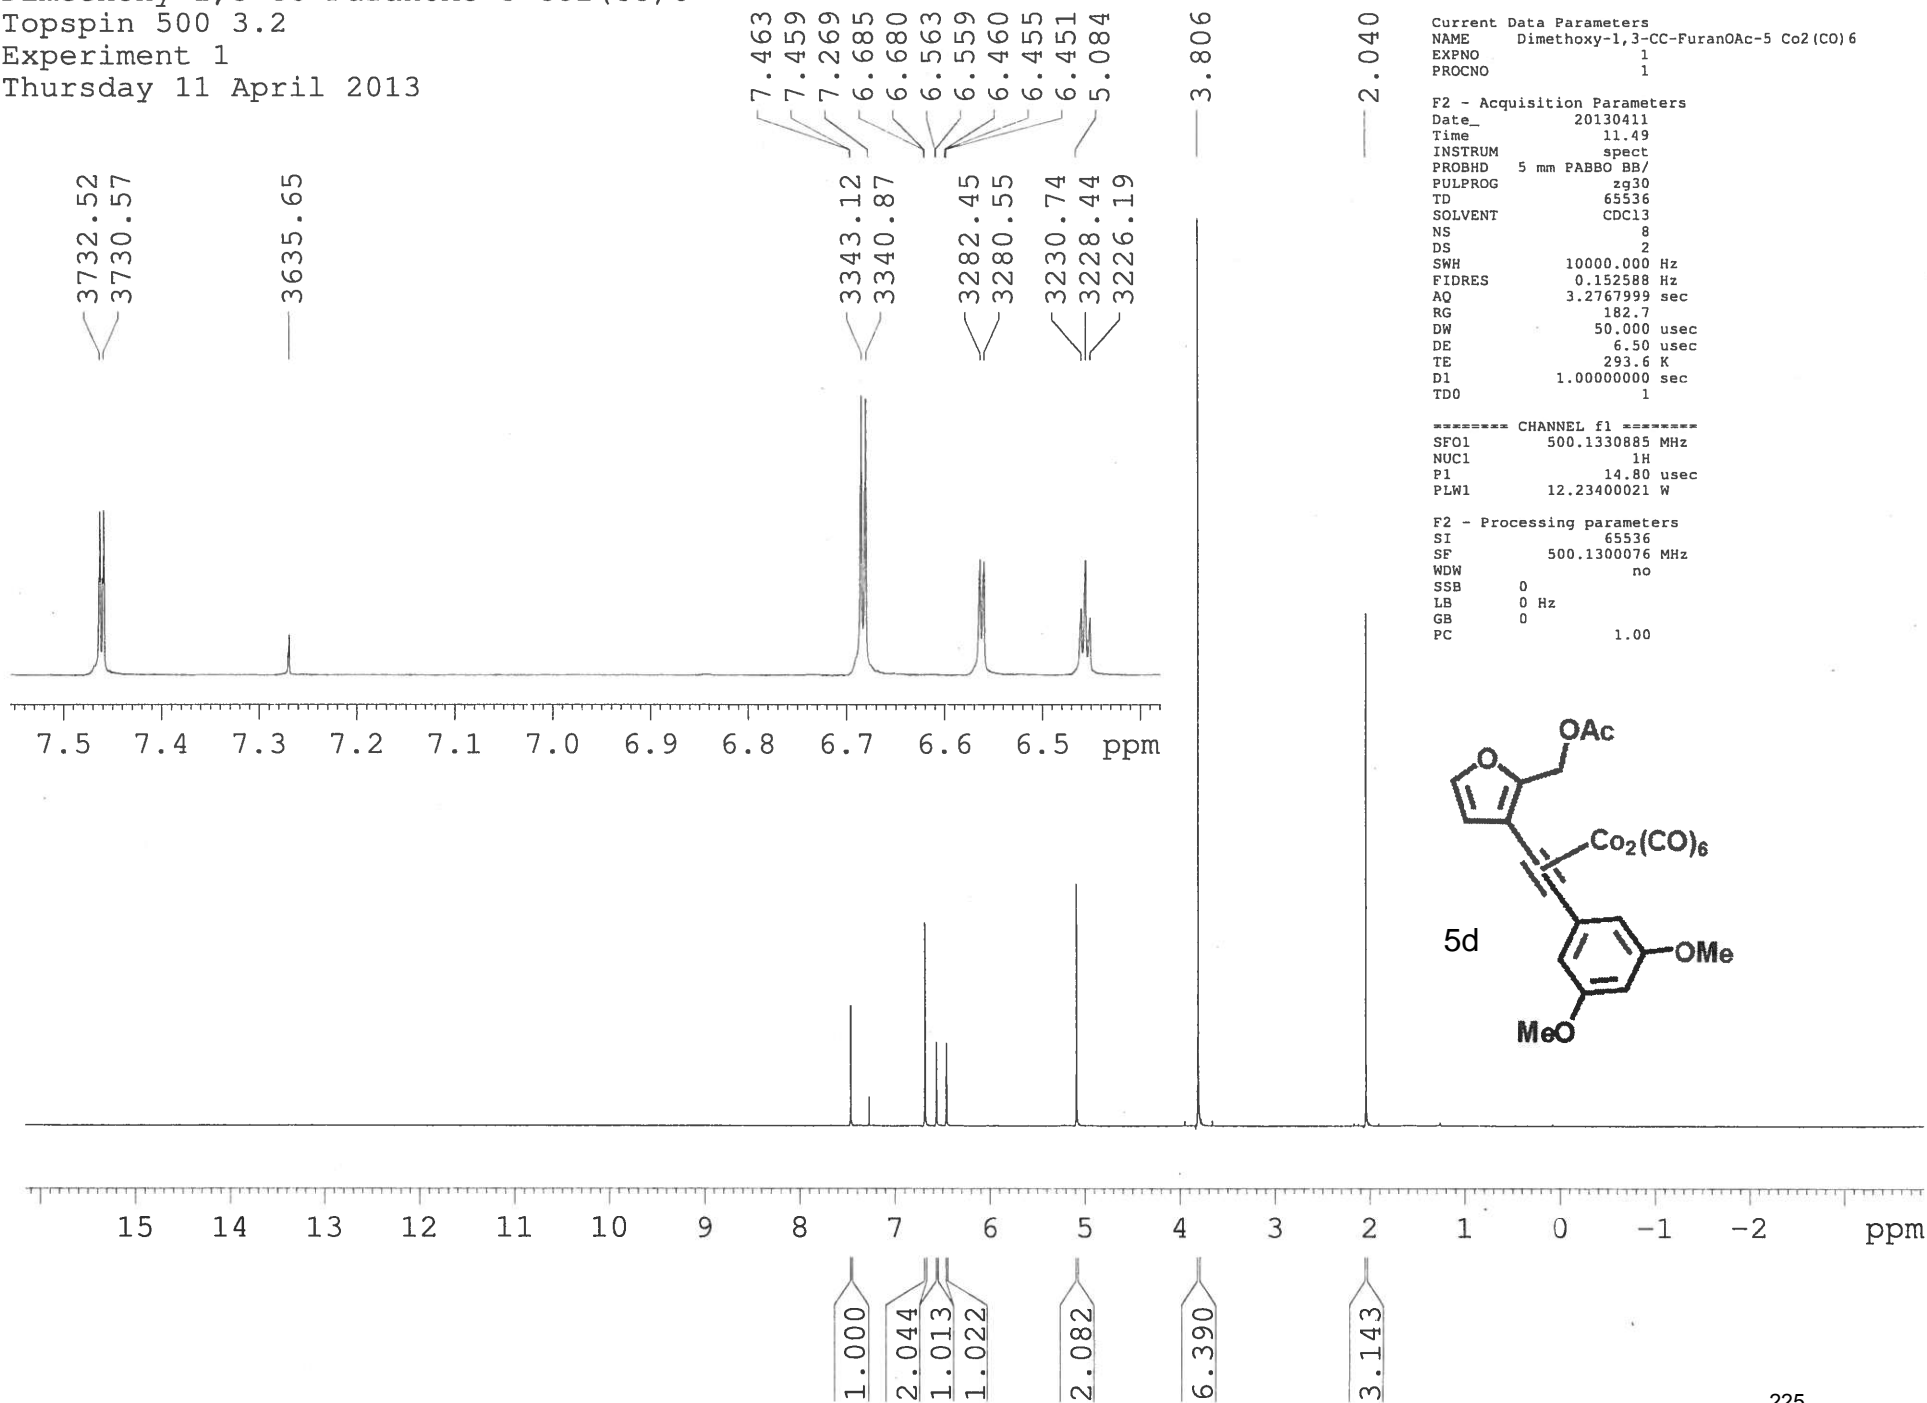

Current Data Parameters  
 NAME Dimethoxy-1,3-CC-FuranOAc-5 Co<sub>2</sub>(CO)<sub>6</sub>  
 EXPNO 1  
 PROCNO 1

F2 - Acquisition Parameters  
 Date\_ 20130411  
 Time 11.49  
 INSTRUM spect  
 PROBHD 5 mm PABBO BB/  
 PULPROG zg30  
 TD 65536  
 SOLVENT CDCl<sub>3</sub>  
 NS 8  
 DS 2  
 SWH 10000.000 Hz  
 FIDRES 0.152588 Hz  
 AQ 3.2767999 sec  
 RG 182.7  
 DW 50.000 usec  
 DE 6.50 usec  
 TE 293.6 K  
 D1 1.00000000 sec  
 TDO 1

\*\*\*\*\* CHANNEL f1 \*\*\*\*\*  
 SFO1 500.1330885 MHz  
 NUC1 1H  
 P1 14.80 usec  
 PLW1 12.23400021 W

F2 - Processing parameters  
 SI 65536  
 SF 500.1300076 MHz  
 WDW no  
 SSB 0  
 LB 0 Hz  
 GB 0  
 PC 1.00

Dimethoxy-1,3-CC-FuranOAc-5 Co<sub>2</sub>(CO)<sub>6</sub> 13C

Topspin 500 3.2

Experiment 1

Thursday 11 April 2013

198.94

170.54

160.91

146.77

143.39

140.05

122.71

112.92

107.37

99.97

92.86

79.34

77.29

77.04

76.78

56.61

55.37

20.55

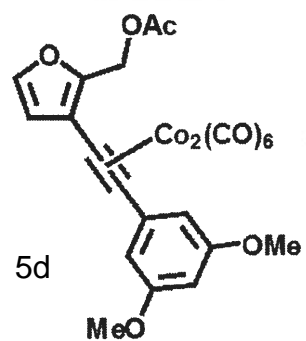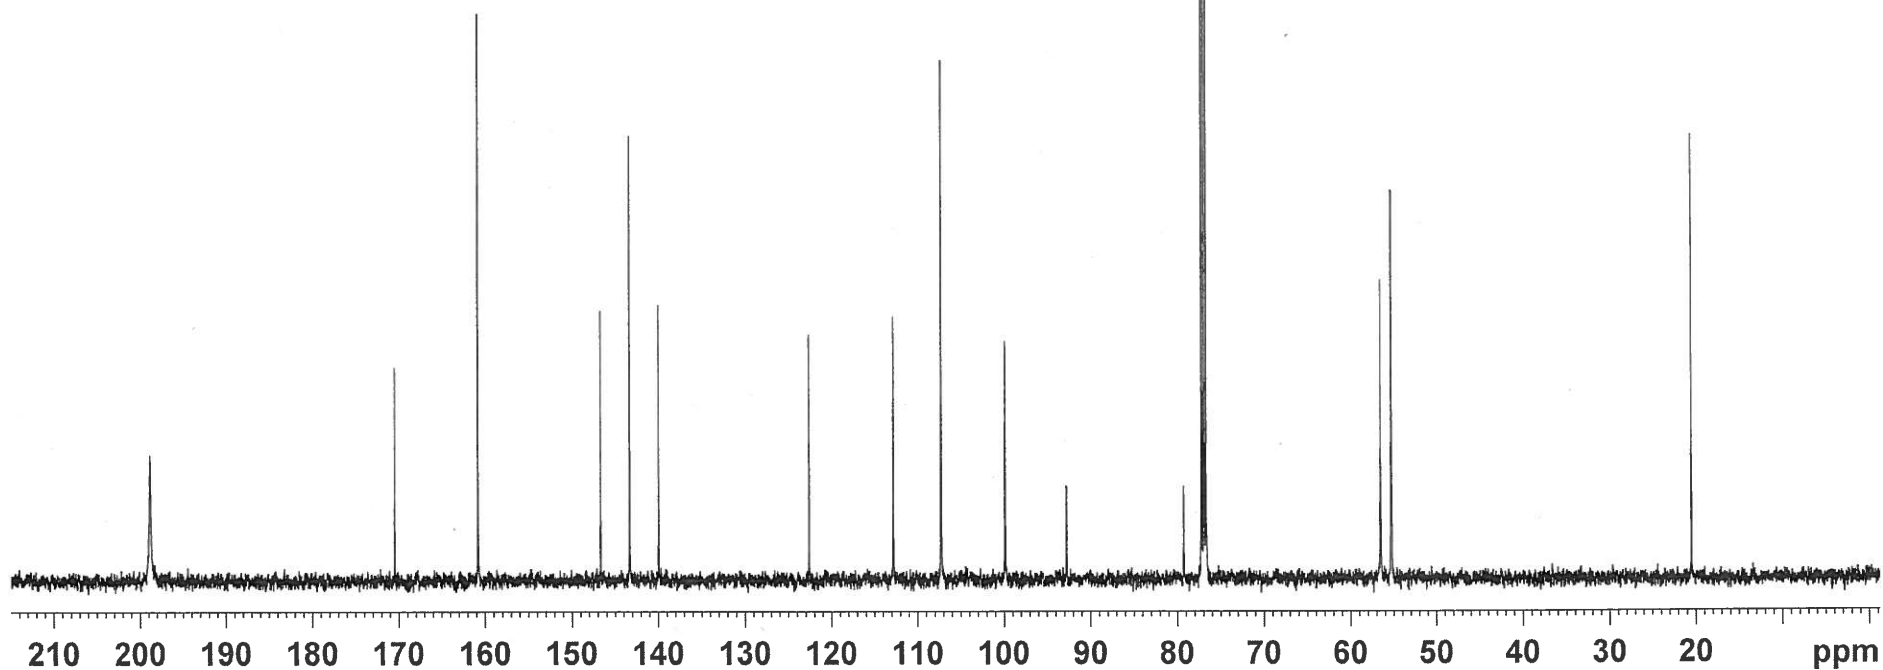

| Year | Number of employees (thousands) |
|------|---------------------------------|
| 2000 | 7,695                           |
| 2001 | 7,358                           |
| 2002 | 7,347                           |
| 2003 | 7,338                           |
| 2004 | 7,328                           |
| 2005 | 7,304                           |
| 2006 | 7,270                           |
| 2007 | 7,261                           |
| 2008 | 7,237                           |
| 2009 | 7,209                           |
| 2010 | 6,911                           |
| 2011 | 6,902                           |
| 2012 | 6,883                           |
| 2013 | 6,874                           |

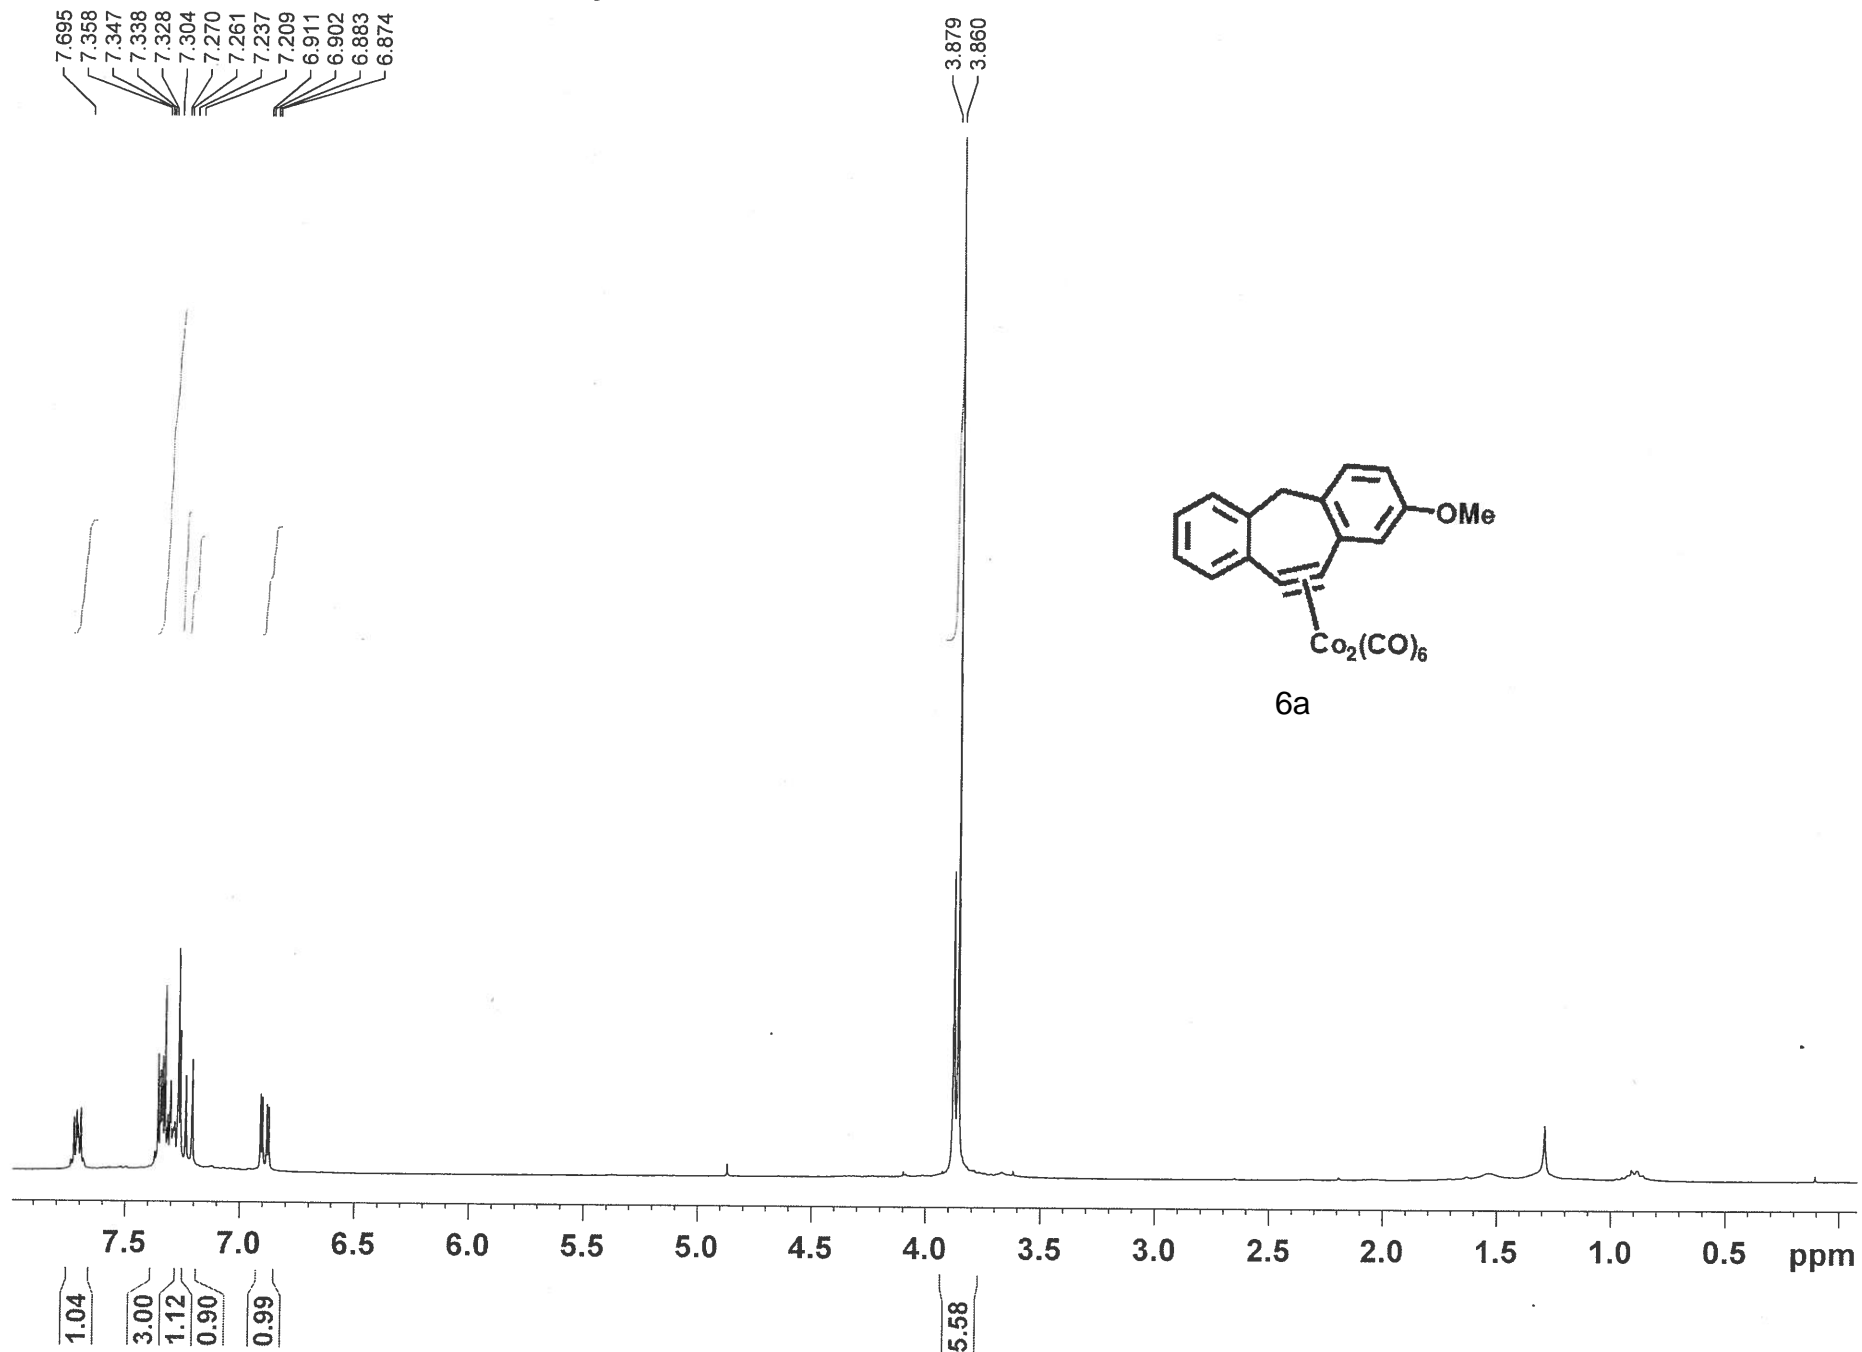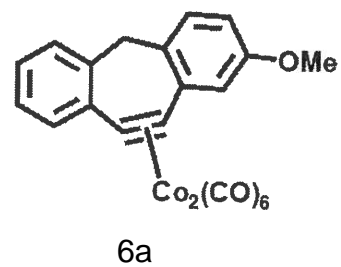

iik.140 5, 13C, MeOPh cycliza, benzyl spacer, major, 7/3/15

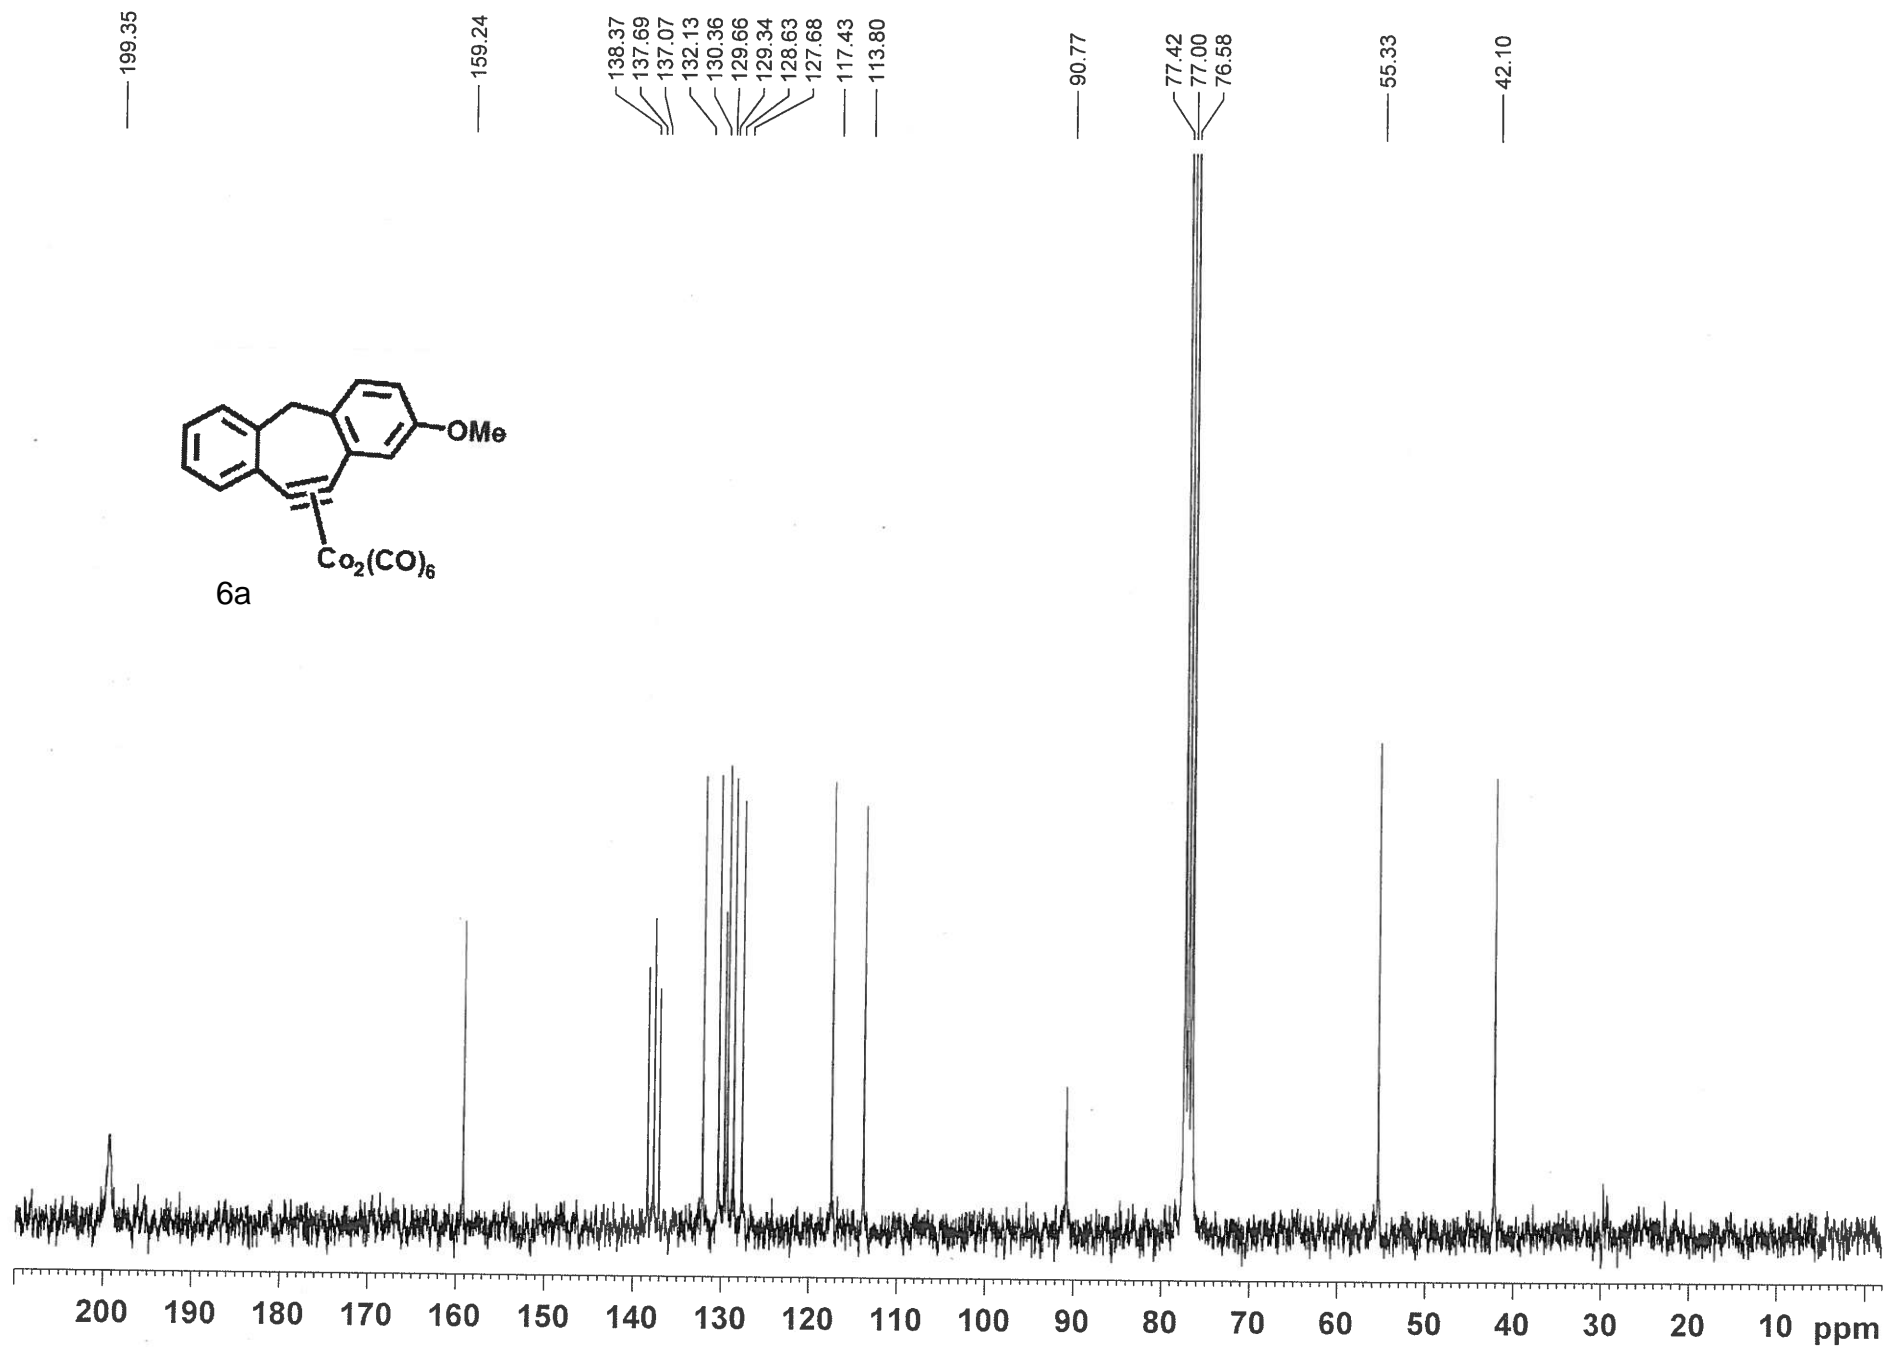



BenzaldeOAc-CC-Anisole Nicholas Cyclization Minor  
 Experiment 2  
 Topspin 500 V3.2  
 Thursday 27 June 2013

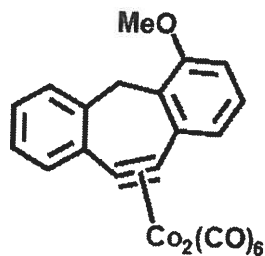

6a'

7.700  
 7.692  
 7.689  
 7.681  
 7.383  
 7.374  
 7.371  
 7.365  
 7.358  
 7.344  
 7.337  
 7.330  
 7.325  
 7.317  
 7.315  
 7.286  
 7.270  
 7.254  
 6.949  
 6.932

4.010  
 3.919

Current Data Parameters  
 NAME BenzaldeOAc-CC-Anisole Nicholas Cyclization Minor  
 EXPNO 2  
 PROCNO 1

F2 - Acquisition Parameters  
 Date\_ 20130627  
 Time 12.58  
 INSTRUM spect  
 PROBHD 5 mm PABBO BB/  
 PULPROG zgpg30  
 TD 32768  
 SOLVENT CDC13  
 NS 16  
 DS 2  
 SWH 11029.412 Hz  
 FIDRES 0.336591 Hz  
 AQ 1.4854827 sec  
 RG 203.82  
 DW 45.333 usec  
 DE 6.50 usec  
 TE 296.2 K  
 D1 1.00000000 sec  
 D12 0.00002000 sec  
 D16 0.00020000 sec  
 TD0 1

===== CHANNEL f1 =====  
 SFO1 500.1305001 MHz  
 NUC1 1H  
 P1 14.80 usec  
 P2 29.60 usec  
 P12 2000.00 usec  
 PLW0 0 W  
 PLW1 12.23400021 W  
 SPNAM[1] Squal100.1000  
 SPOAL1 0.500  
 SPOFFS1 0 Hz  
 SPW1 0.00267970 W

===== GRADIENT CHANNEL =====  
 GPNAM[1] SMSQ10.100  
 GPNAM[2] SMSQ10.100  
 GPZ1 31.00 %  
 GPZ2 11.00 %  
 P16 1000.00 usec

F2 - Processing parameters  
 SI 32768  
 SF 500.1300069 MHz  
 WDW no  
 SSB 0  
 LB 0 Hz  
 GB 0  
 PC 1.00

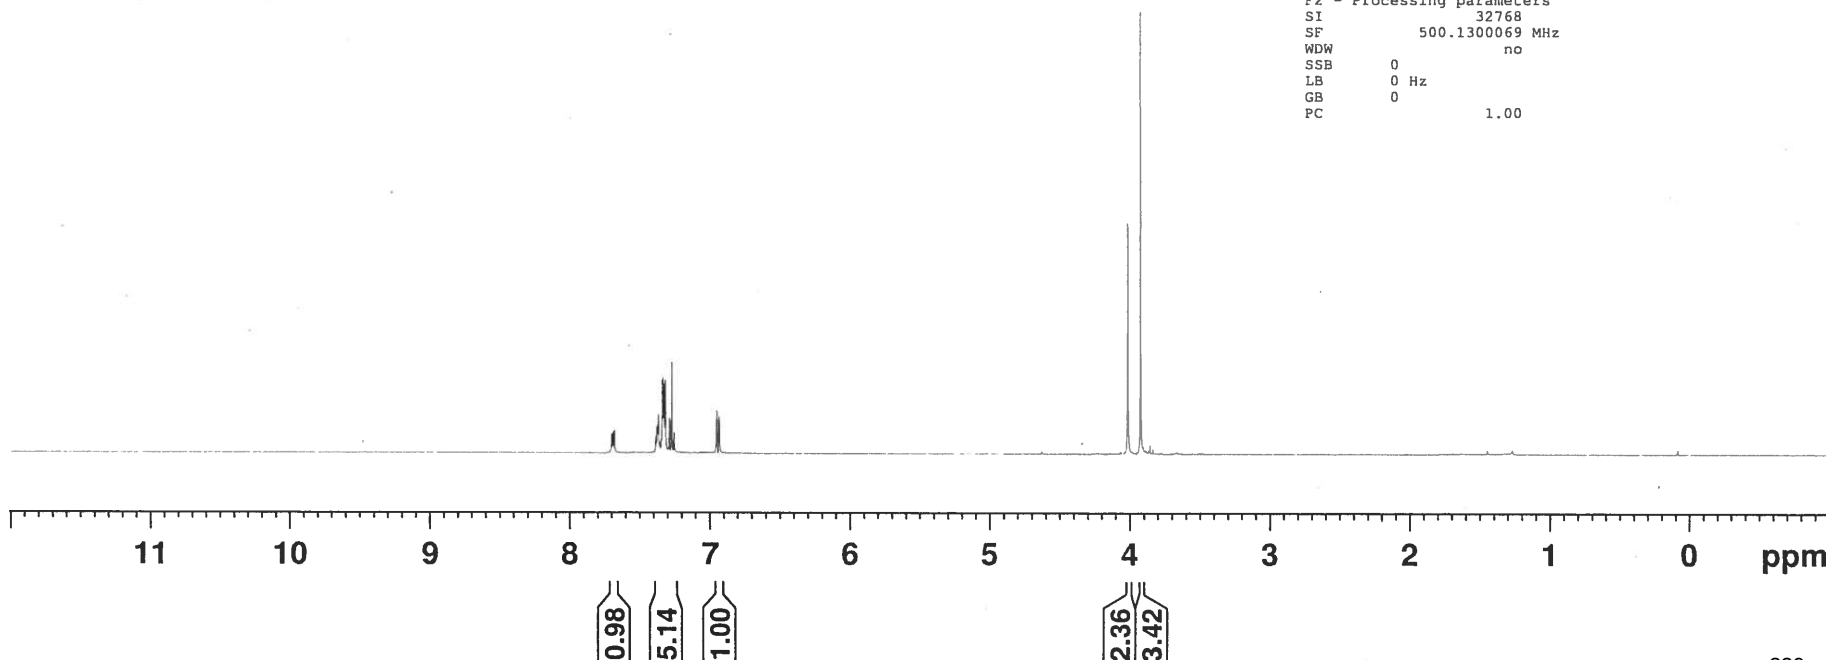

BenzalOAc-CC-Anisole Co<sub>2</sub>(CO)<sub>6</sub> Cyclized Minor 13C  
 Topspin 300 Experiment 2  
 Wednesday 03 July 2013

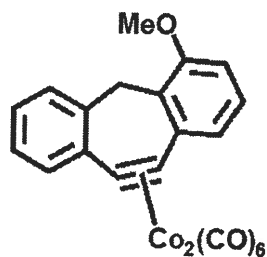

6a'

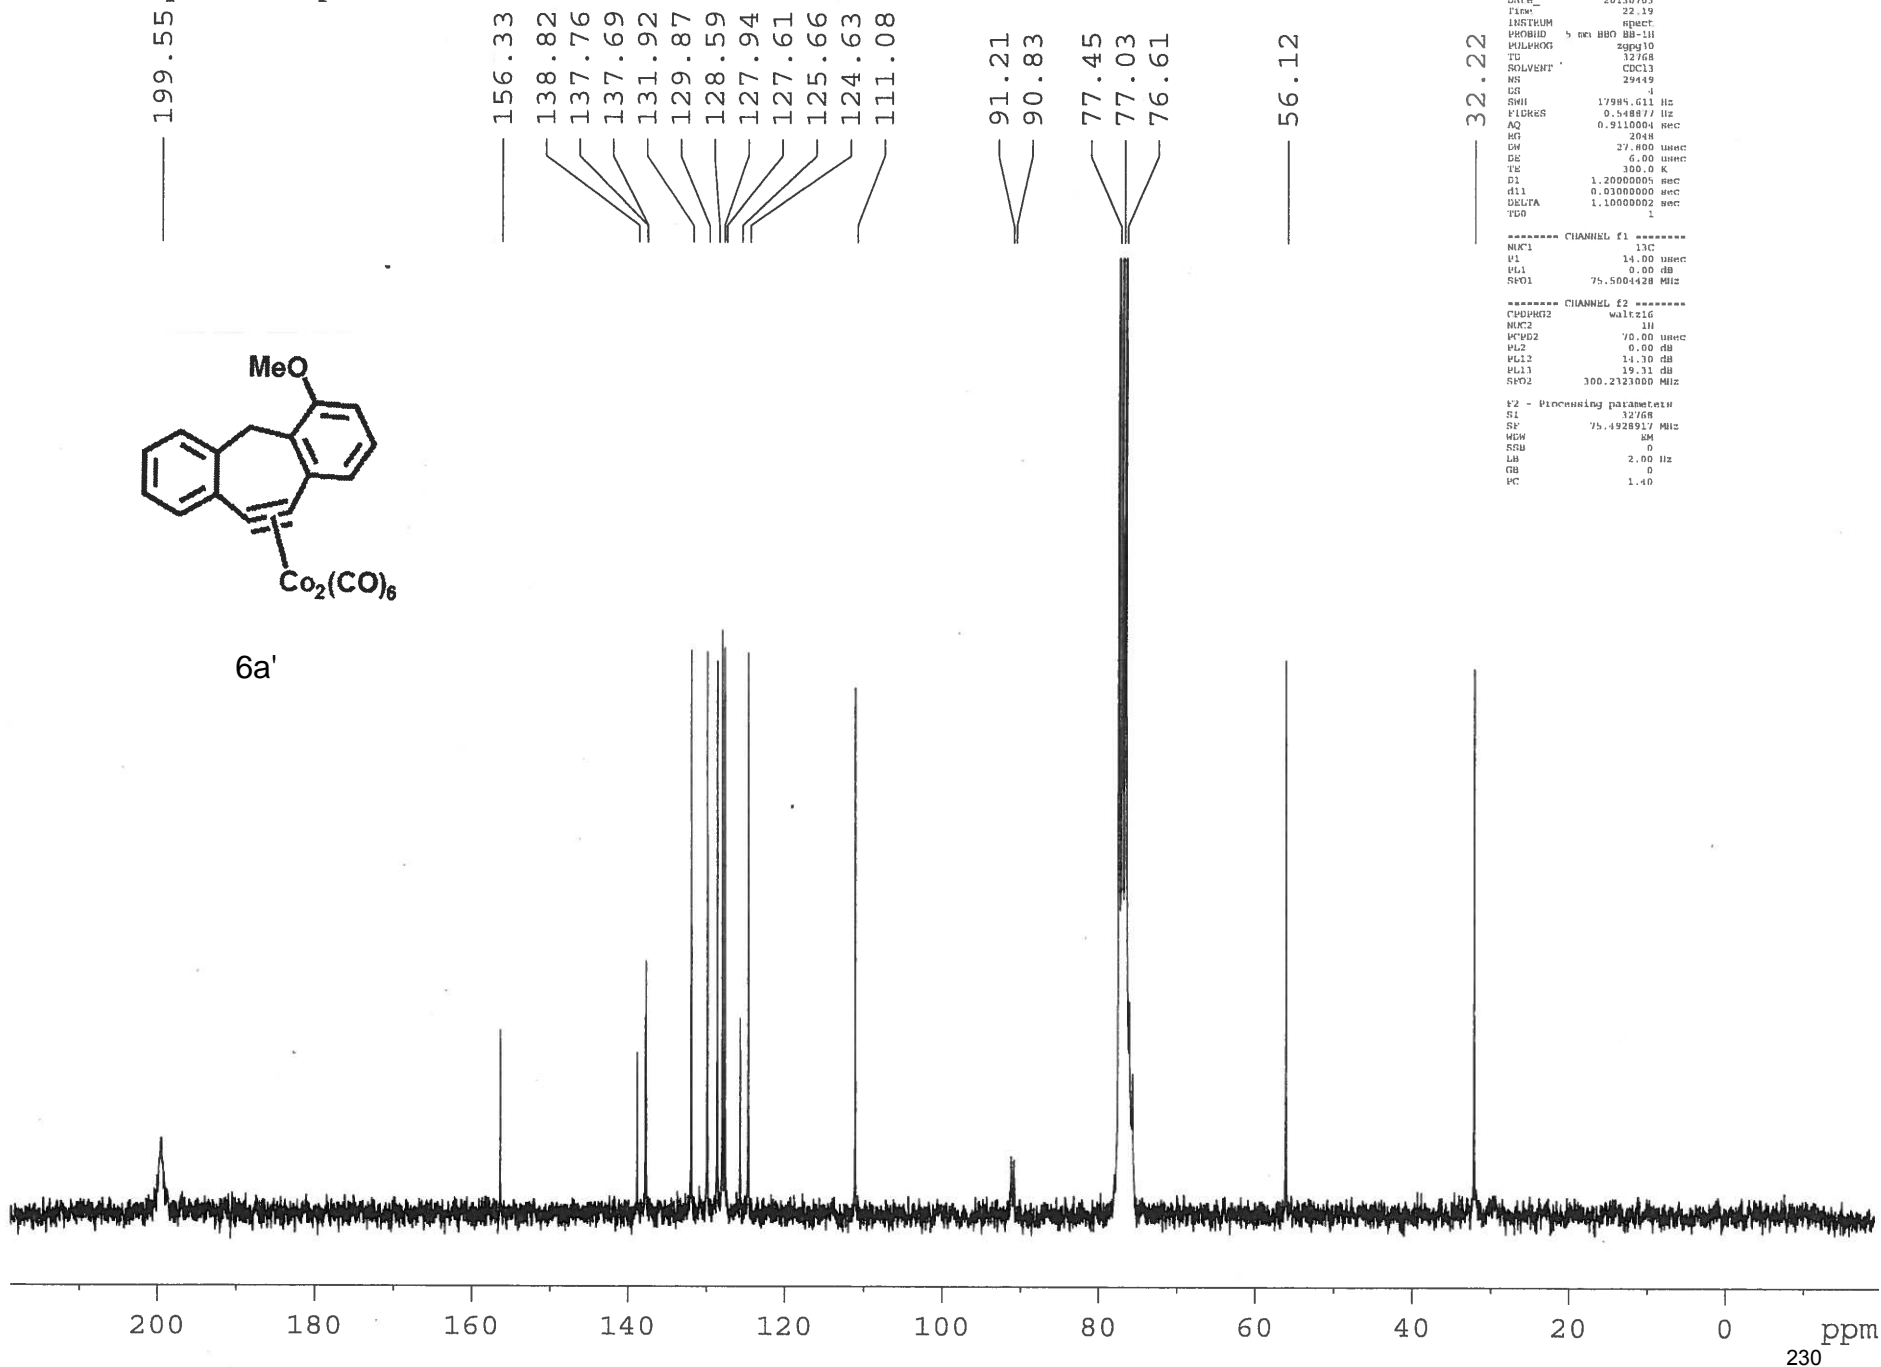

```

Current Data Parameters
NAME      BenzalOAc-CC-Anisole Co2(CO)6 Cyclized Minor 13C
EXPNO     2
PROCNO    1

F2 - Acquisition Parameters
Date_     20130703
Time      22.19
INSTRUM    spect
PROBHD     5 mm BBO BB-1H1
PULPROG    zgpg10
TD         32768
SOLVENT    CDCl3
NS         2048
DS         4
SWH         17984.611 Hz
FIDRES     0.548877 Hz
AQ         0.9110004 sec
RG         2048
DM         27.400 umsec
DE         6.00 umsec
TE         300.0 K
D1         1.20000005 sec
d11        0.01000000 sec
DELTA      1.10000002 sec
TD0        1

===== CHANNEL f1 =====
NUC1       13C
P1         14.00 umsec
PL1        0.00 dB
SFO1       75.5004428 MHz

===== CHANNEL f2 =====
CPDPRG2    waltz16
NUC2       1H
PCPD2      70.00 umsec
PL2        0.00 dB
PL12       14.10 dB
PL13       19.31 dB
SFO2       300.2121000 MHz

F2 - Processing parameters
SI         32768
SF         75.4928917 MHz
RG         64
SDW        0
LB         2.00 Hz
GB         0
PC         1.40
  
```

BenzaldeOAc-1,3-Dimethoxybenzene Nicholas Cyclization  
 Experiment 2 Topspin 500 V3.2  
 Tuesday 02 July 2013

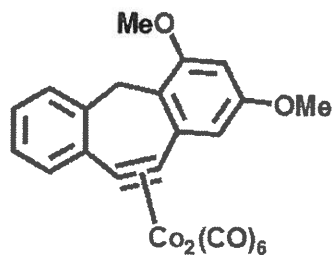

7.713  
7.711  
7.704  
7.697  
7.693  
7.686  
7.678  
7.675  
7.668  
7.664  
7.662  
7.657  
7.648  
7.640  
7.633  
7.628  
7.622  
7.614  
7.610  
7.608  
6.868  
6.863  
6.545  
6.540

3.944  
3.904  
3.865

Current Data Parameters  
 NAME BenzaldeOAc-CC-1,3-Dimethoxybenzene Nicholas Cyclization  
 EXPNO 2  
 PROCNO 1

F2 - Acquisition Parameters  
 Date\_ 20130702  
 Time 18.20  
 INSTRUM spect  
 PROBHD 5 mm PABBO BB/  
 PULPROG zgpg30  
 TD 32768  
 SOLVENT CDCl3  
 NS 16  
 DS 2  
 SWH 11029.412 Hz  
 FIDRES 0.336591 Hz  
 AQ 1.4854827 sec  
 RG 108.72  
 DW 45.333 usec  
 DE 6.50 usec  
 TE 294.4 K  
 D1 1.00000000 sec  
 D12 0.00002000 sec  
 D16 0.00020000 sec  
 TDO 1

===== CHANNEL f1 =====  
 SFO1 500.1301000 MHz  
 NUC1 1H  
 P1 14.80 usec  
 P2 29.60 usec  
 P12 2000.00 usec  
 PLW0 0 W  
 PLW1 12.23400021 W  
 SPNAM[1] Squal00.1000  
 SPOAL1 0.500  
 SPOFFS1 0 Hz  
 SPW1 0.00267970 W

===== GRADIENT CHANNEL =====  
 GPNAM[1] SMSQ10.100  
 GPNAM[2] SMSQ10.100  
 GP21 31.00 %  
 GP22 11.00 %  
 P16 1000.00 usec

F2 - Processing parameters  
 S1 32768  
 SF 500.1300065 MHz  
 WDW EM  
 SSB 0  
 LB 0.30 Hz  
 GB 0  
 PC 1.00

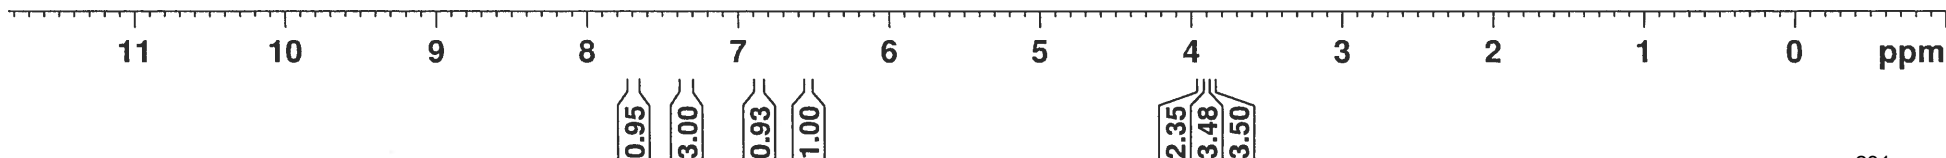

Benzaldehyde-CC-1,3-Dimethoxybenzene  $\text{Co}_2(\text{CO})_6$  Cyclized  $^{13}\text{C}$   
 Experiment 2 Topspin 300 V1.3  
 Tuesday 02 July 2013

199.56  
 159.60  
 157.22  
 139.38  
 138.11  
 137.63  
 131.96  
 129.76  
 128.60  
 127.54  
 118.40  
 108.26  
 99.09  
 91.61  
 90.90  
 77.47  
 77.05  
 76.63  
 56.10  
 55.40  
 31.81

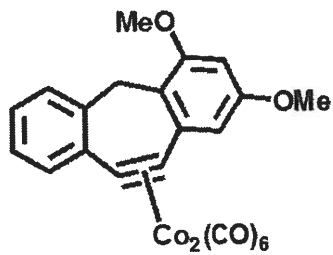

6b

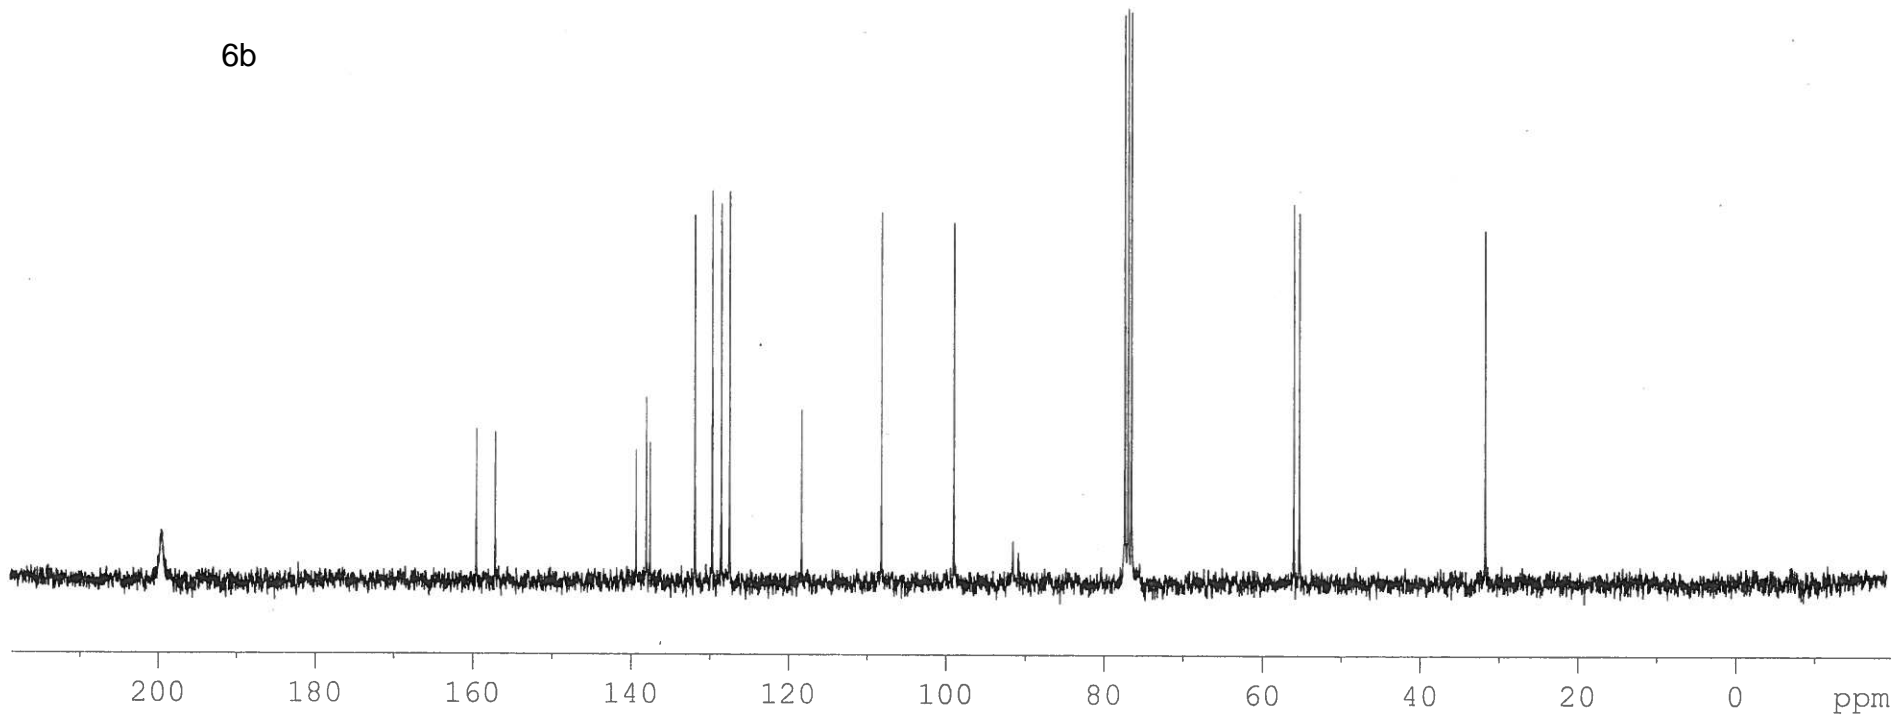

ThiopheneOAc-CC-1,3-Dimethoxybenzene Co<sub>2</sub>(CO)<sub>6</sub> Cyclized  
 Experiment 1 Topspin 500 V3.2  
 Friday 05 July 2013

Current Data Parameters  
 NAME ThiopheneOAc-CC-1,3-Dimethoxybenzene Co<sub>2</sub>(CO)<sub>6</sub> Cyclized  
 EXPNO 1  
 PROCNO 1

F2 - Acquisition Parameters  
 Date\_ 20130705  
 Time 16.14  
 INSTRUM spect  
 PROBHD 5 mm PABBO BB/  
 PULPROG zgpg30  
 TD 32768  
 SOLVENT CDCl<sub>3</sub>  
 NS 16  
 DS 2  
 SWH 11029.412 Hz  
 FIDRES 0.336591 Hz  
 AQ 1.4854827 sec  
 RG 122.48  
 DW 45.333 usec  
 DE 6.50 usec  
 TE 294.9 K  
 D1 1.00000000 sec  
 D12 0.00020000 sec  
 D16 0.00020000 sec  
 TD0 1

===== CHANNEL f1 =====  
 SFO1 500.1305751 MHz  
 NUC1 1H  
 P1 14.80 usec  
 P2 29.60 usec  
 P12 2000.00 usec  
 PLW0 0 W  
 PLW1 12.23400021 W  
 SPNAM[1] Squal00.1000  
 SPOAL1 0.500  
 SPOFFS1 0 Hz  
 SPW1 0.00267970 W

===== GRADIENT CHANNEL =====  
 GPNAM[1] SMSQ10.100  
 GPNAM[2] SMSQ10.100  
 GPZ1 31.00 %  
 GPZ2 11.00 %  
 P16 1000.00 usec

F2 - Processing parameters  
 SI 32768  
 SF 500.1300066 MHz  
 WDW no  
 SSB 0  
 LB 0 Hz  
 GB 0  
 PC 1.00

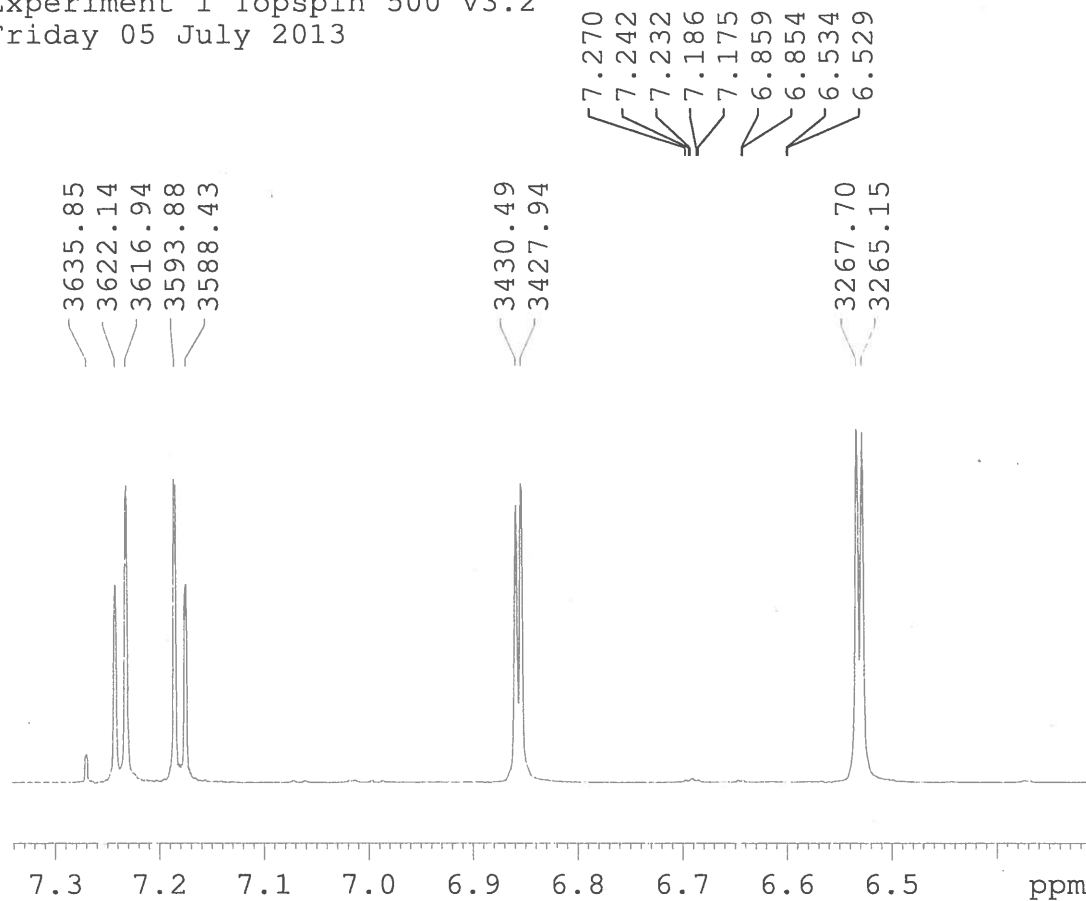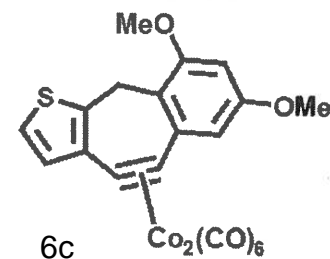

ThiopheneOAc-CC-1,3-Dimethoxybenzene Co<sub>2</sub>(CO)<sub>6</sub> Cyclized 13C  
 Topspin 300 Experiment 1  
 Friday 05 July 2013

199.49

159.69  
157.00

139.93  
137.40  
135.81  
129.41  
123.75

118.03  
109.38

99.07

91.21

84.83  
77.43  
77.05  
76.63

56.04  
55.37

24.95

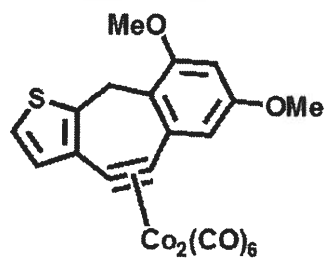

6c

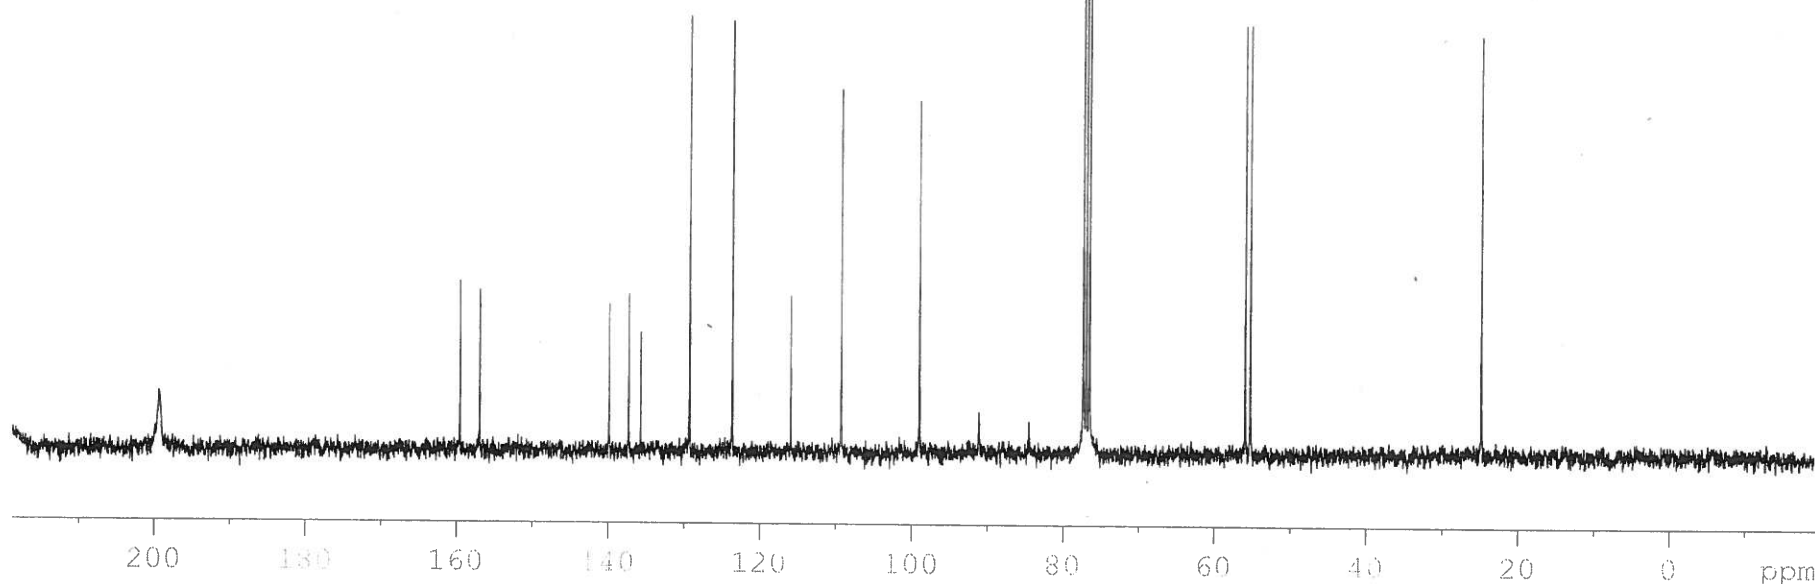

iik.120 4, 1H, furan cycliz prod, aft chrom, 7/9/15

7.381  
7.375  
7.270

6.860  
6.852  
6.609  
6.602  
6.509  
6.500

4.141

3.869  
3.852

1.567

1.264

0.889  
0.864

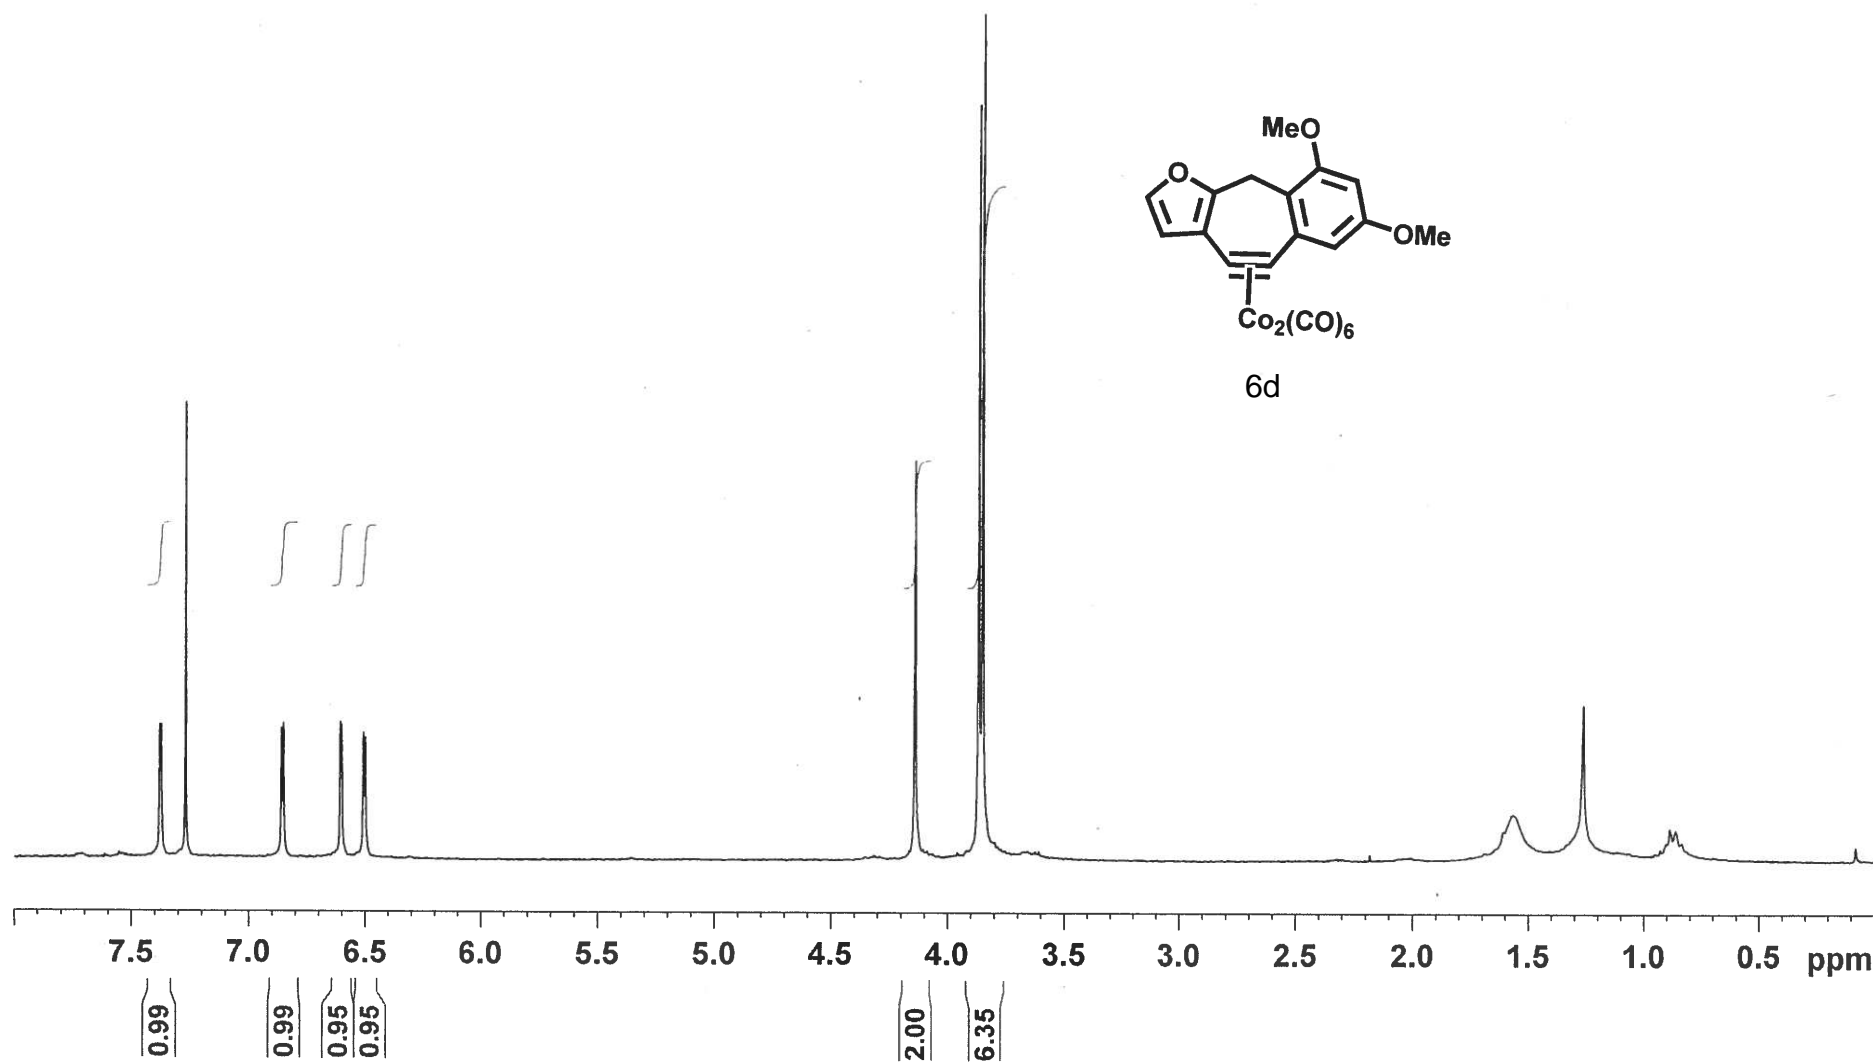

iik.120 6, <sup>13</sup>C, isabelle's furan adduct, 500 NMR, 7/10/15

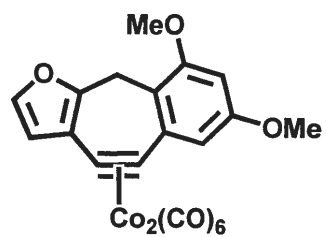

6d

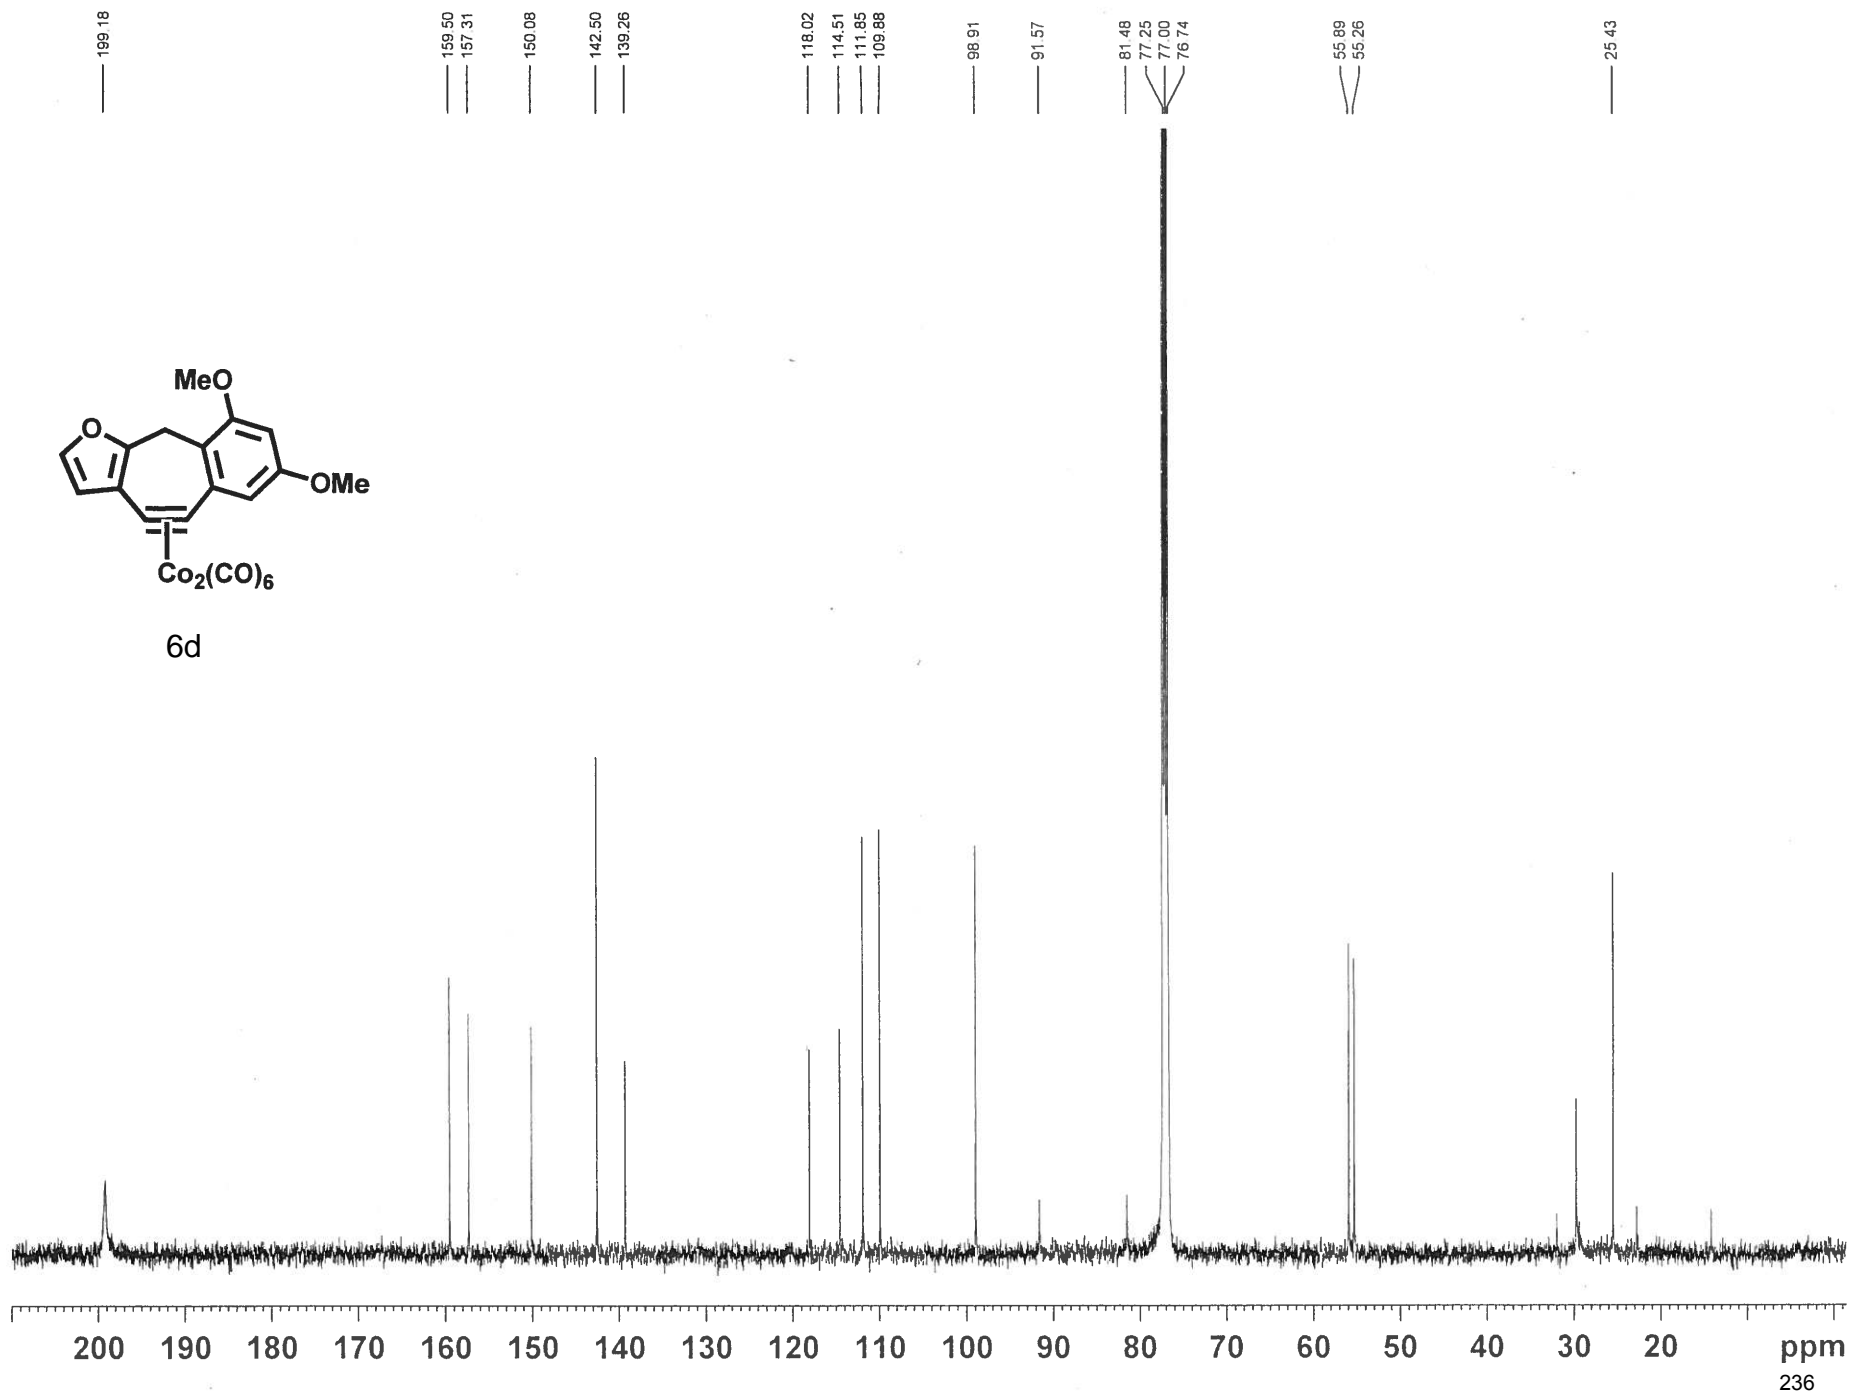



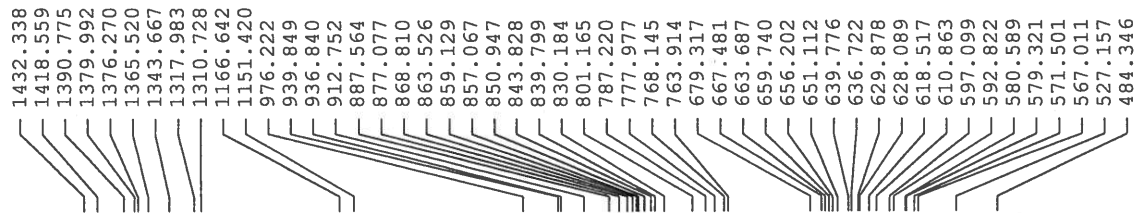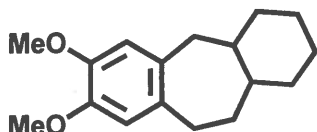

20

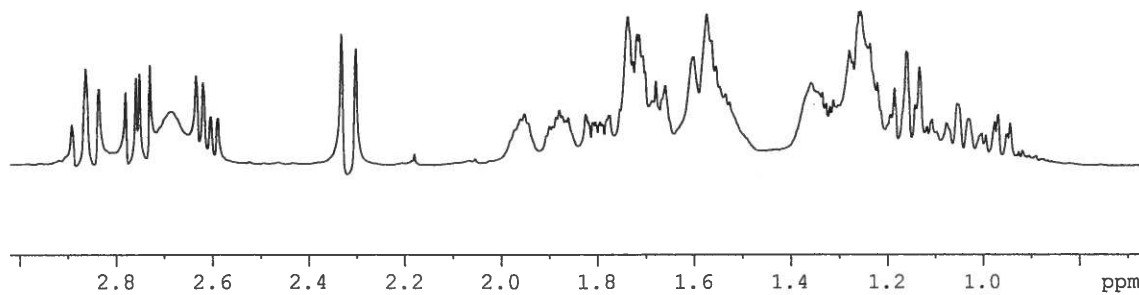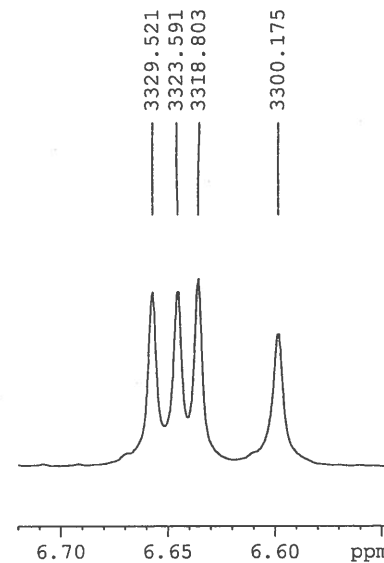

Current Data Parameters  
NAME Dimethoxy-1,2-Cyclohexene-4 Co2(CO)6 Deconpl  
EXNO 5  
PROCNO 1

F2 - Acquisition Parameters  
Date 20110301  
Time 15:15  
INSTRUM spect  
PROBHD 5 mm PABBO BB/  
PULPROG zgpg30  
TD 32768  
SOLVENT H2O  
HS 2  
DS 2  
SWH 10964.912 Hz  
FIDRES 0.334623 Hz  
AQ 1.4943165 sec  
RG 50.8  
DM 45.600 usec  
DE 6.50 usec  
TE 294.2 K  
D1 2.00000000 sec  
d12 0.00002000 sec  
D16 0.00020000 sec  
TDO 1

----- CHANNEL f1 -----  
NUC1 1H  
P1 14.50 usec  
PC 25.00 usec  
P12 2000.00 usec  
PL0 120.00 dB  
PL1 -1.40 dB  
SF01 500.1326507 MHz  
SPL 35.19 dB  
SFOAM1 Squal100.1000  
SFOAL1 0.500  
SFOFFS1 0.00 Hz

----- GRADIENT CHANNEL -----  
GPMAM1 SINE.100  
GPMAM2 SINE.100  
GPZ1 31.00 %  
GPZ2 11.00 %  
P16 1000.00 usec

F2 - Processing parameters  
SI 32768  
SF 500.1300193 MHz  
WDW EM  
SSB 0  
LB 0.25 Hz  
GB 0  
FC 1.00

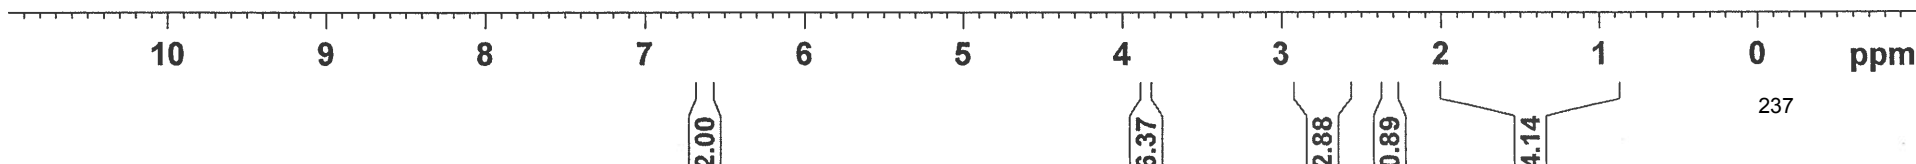

TricyclicFrameworkDecomplexed-FullyReduced 13C  
 Topspin 500 3.1  
 Experiment 3  
 Friday 20 July 2012

Current Data Parameters  
 NAME TricyclicFrameworkDecomplexed-FullyReduced 13C  
 EXPNO 3  
 PROCNO 1

F2 - Acquisition Parameters  
 Date\_ 20120720  
 Time\_ 12.28  
 INSTRUM spect  
 PROBHD 5 mm PABBO BB/  
 PULPROG zgpg30  
 TD 65536  
 SOLVENT CDC13  
 NS 23  
 DS 4  
 SWH 29761.904 Hz  
 FIDRES 0.454131 Hz  
 AQ 1.1010048 sec  
 RG 203.82  
 DW 16.800 usec  
 DE 6.50 usec  
 TE 295.4 K  
 D1 2.00000000 sec  
 D11 0.03000000 sec  
 TD0 1

===== CHANNEL f1 =====  
 SFO1 125.7703637 MHz  
 NUC1 13C  
 P1 9.50 usec  
 PLW1 66.48200226 W

===== CHANNEL f2 =====  
 SFO2 500.1320005 MHz  
 NUC2 1H  
 CPDPRG[2] waltz16  
 PCPD2 80.00 usec  
 PLW2 12.23400021 W  
 PLW12 0.41870999 W  
 PLW13 0.26797000 W

F2 - Processing parameters  
 SI 32768  
 SF 125.7577890 MHz  
 WDW EM  
 SSB 0  
 LB 1.00 Hz  
 GB 0  
 PC 1.40

146.601  
 146.541  
 146.527  
 146.400  
 135.391  
 135.133  
 134.279  
 113.863  
 113.149  
 112.614  
 112.488

77.495  
 77.239  
 76.985

56.033  
 55.982  
 55.926  
 48.515  
 43.950  
 43.763  
 38.103  
 36.424  
 35.861  
 35.432  
 34.972  
 26.796  
 26.435

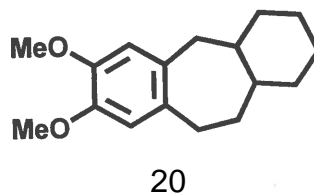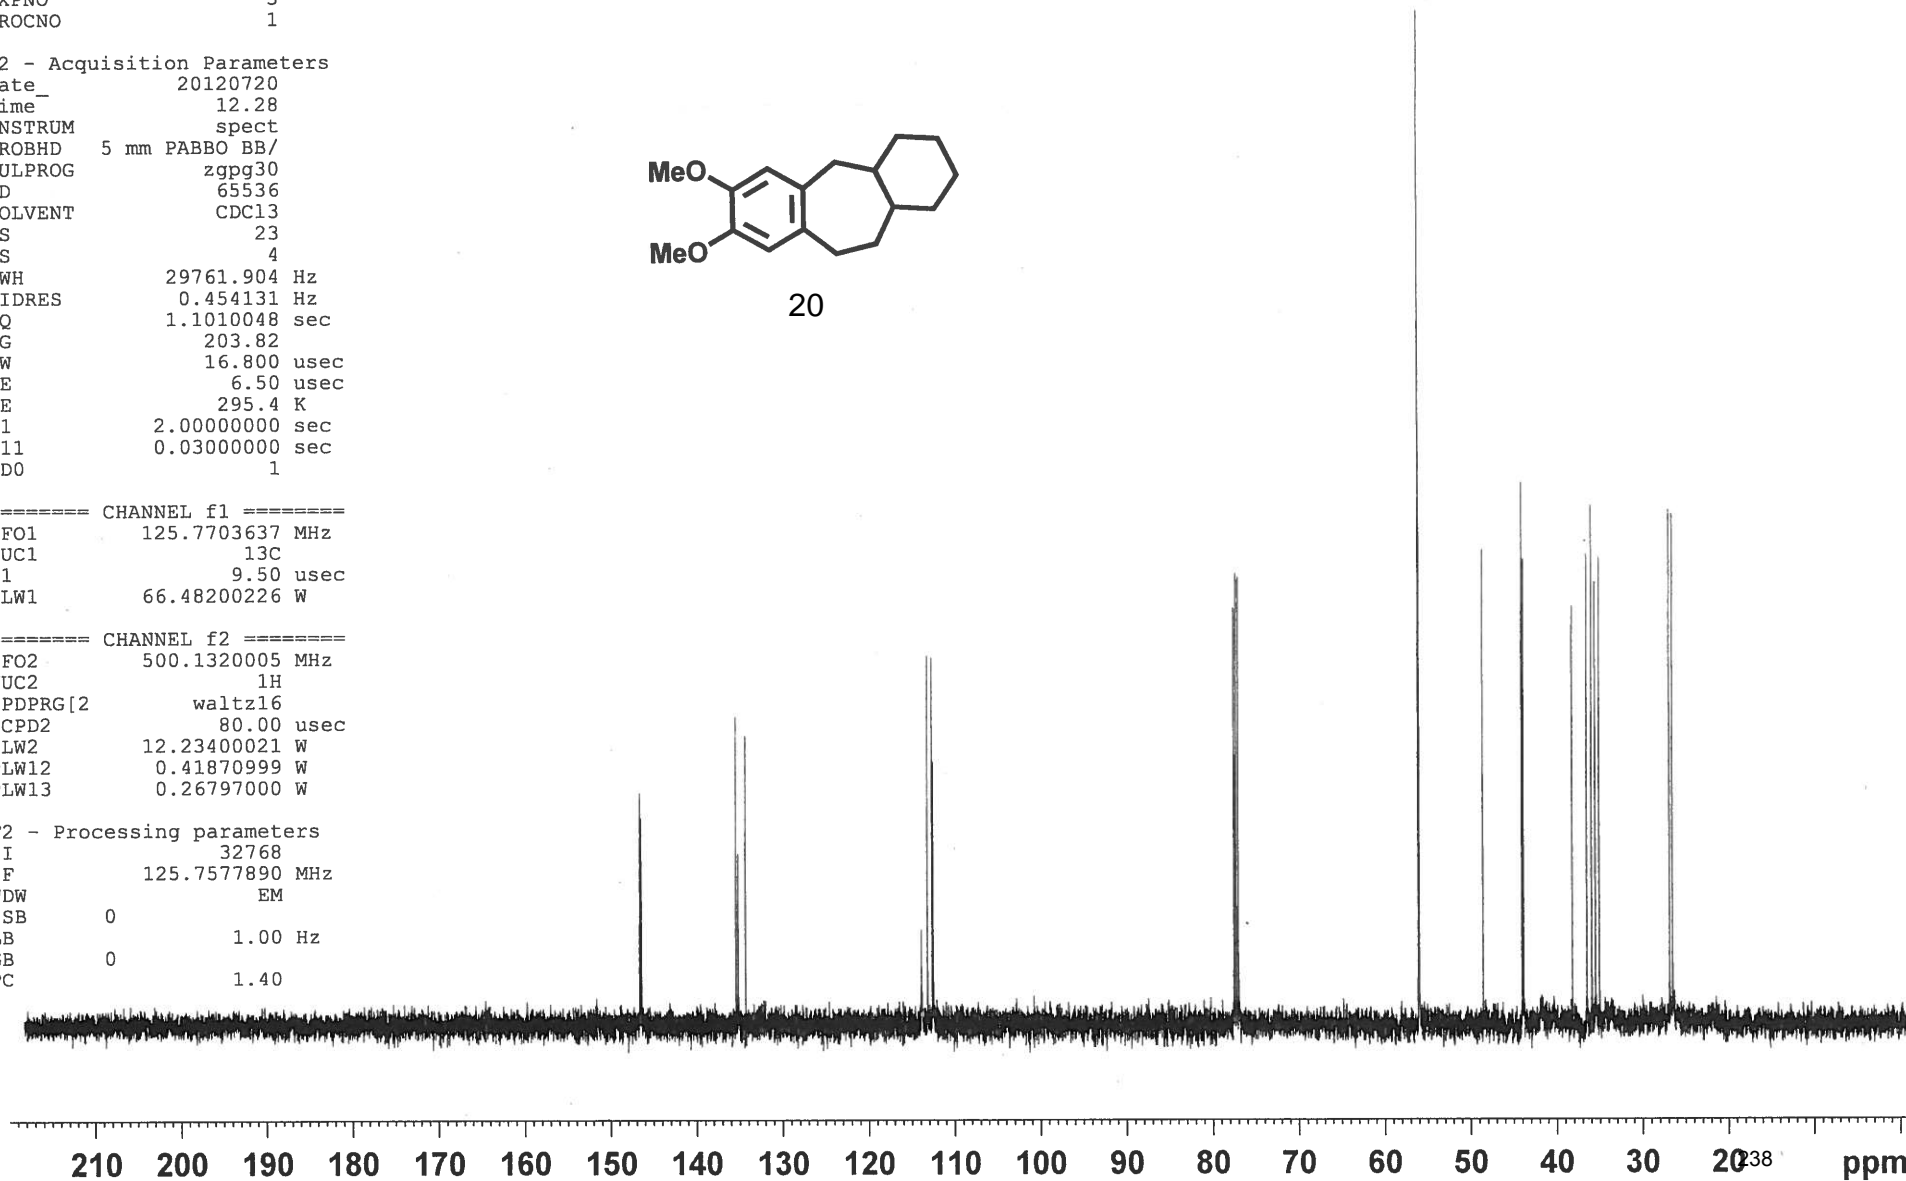

Dimethoxy-1,2-Cyclohexeneacetate-4 Co<sub>2</sub>(CO)<sub>6</sub> Decomplexed Not TFA  
 Thursday 14 April 2011  
 Topspin 500 Experiment 1

7.269  
 6.872  
 6.614  
 6.509

3.898  
 3.859

2.753  
 2.319

0.966  
 0.950  
 0.935  
 0.791  
 0.790  
 0.776  
 0.760  
 0.745  
 0.743

482.961  
 475.024  
 467.378

395.812  
 395.270  
 388.022  
 380.117  
 372.452  
 371.647

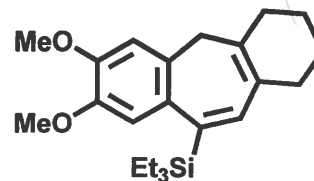

21

```

===== CHANNEL f1 =====
NUC1 1H
P1 15.00 use
FL1 0.50 dB
SFO1 500.130460 MHz

F2 - Processing parameters
SI 32768
SF 500.130460 MHz
WDW no
SSB 0
LB 0.00 Hz
GB 0
PC 1.00
  
```

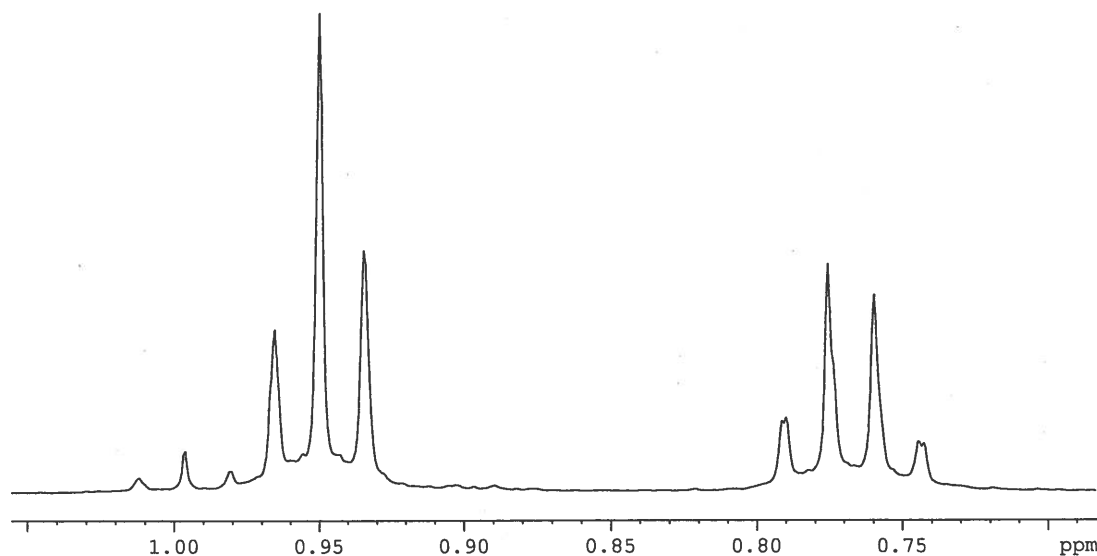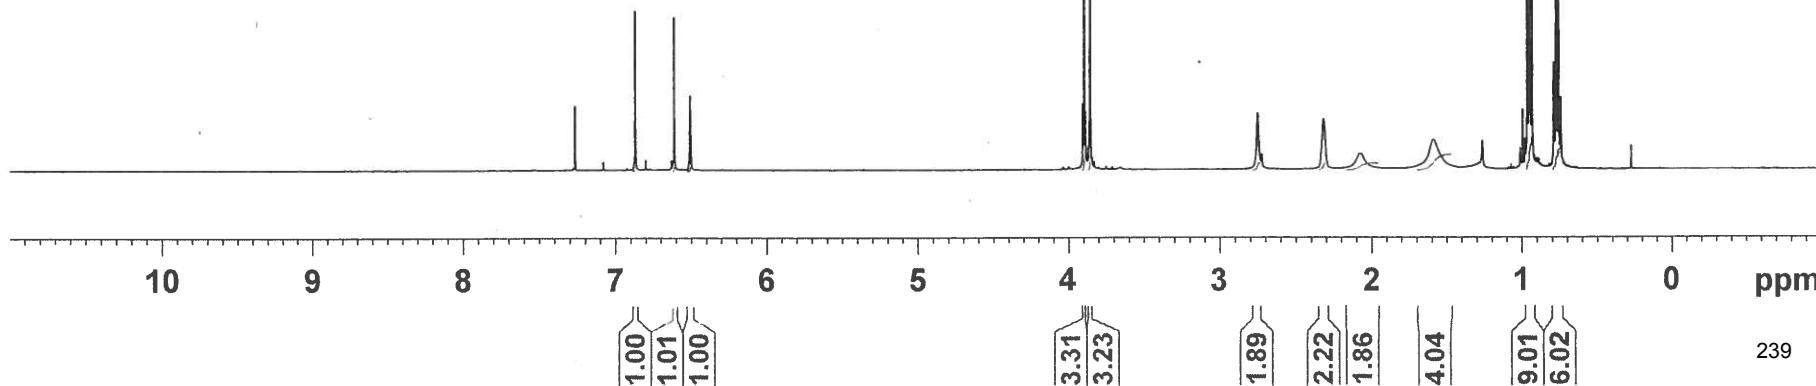

TricyclicFrameworkDecomplexed-SiEt3  
Topspin 500 3.1  
Thursday 05 July 2012  
Experiment 1

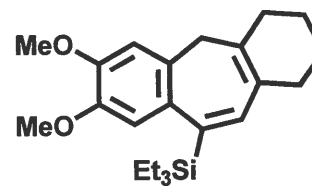

21

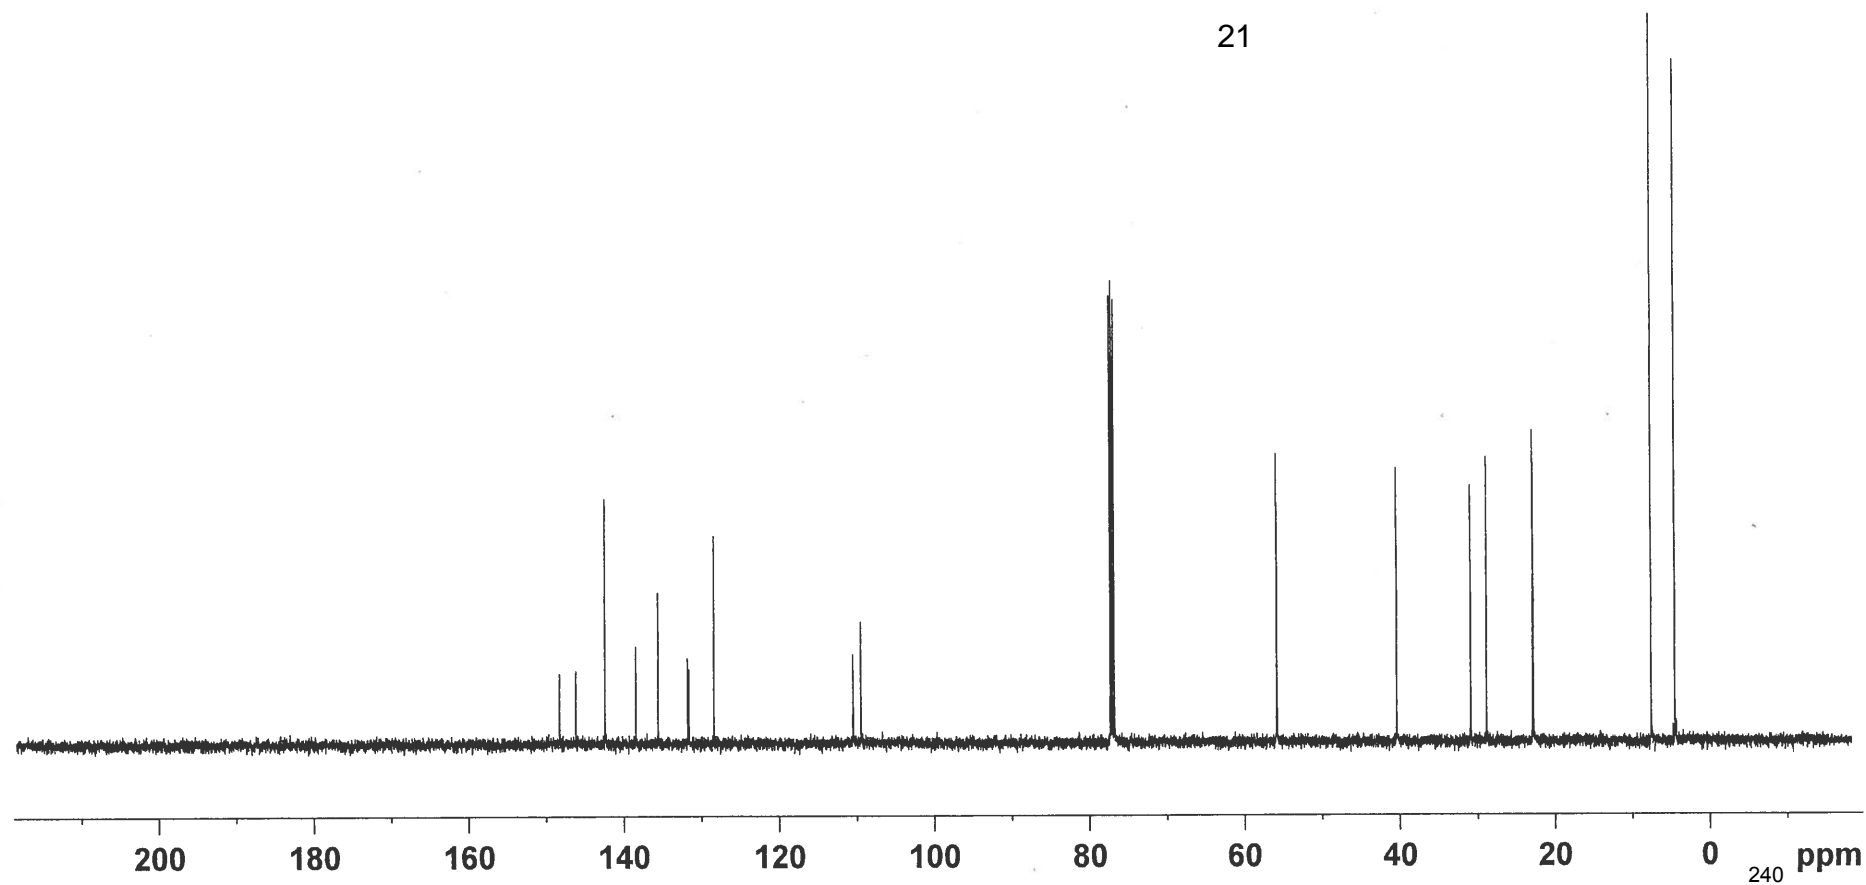

methoxy-  
 experiment  
 tra 300 Topspin  
 esday 25 October 2011

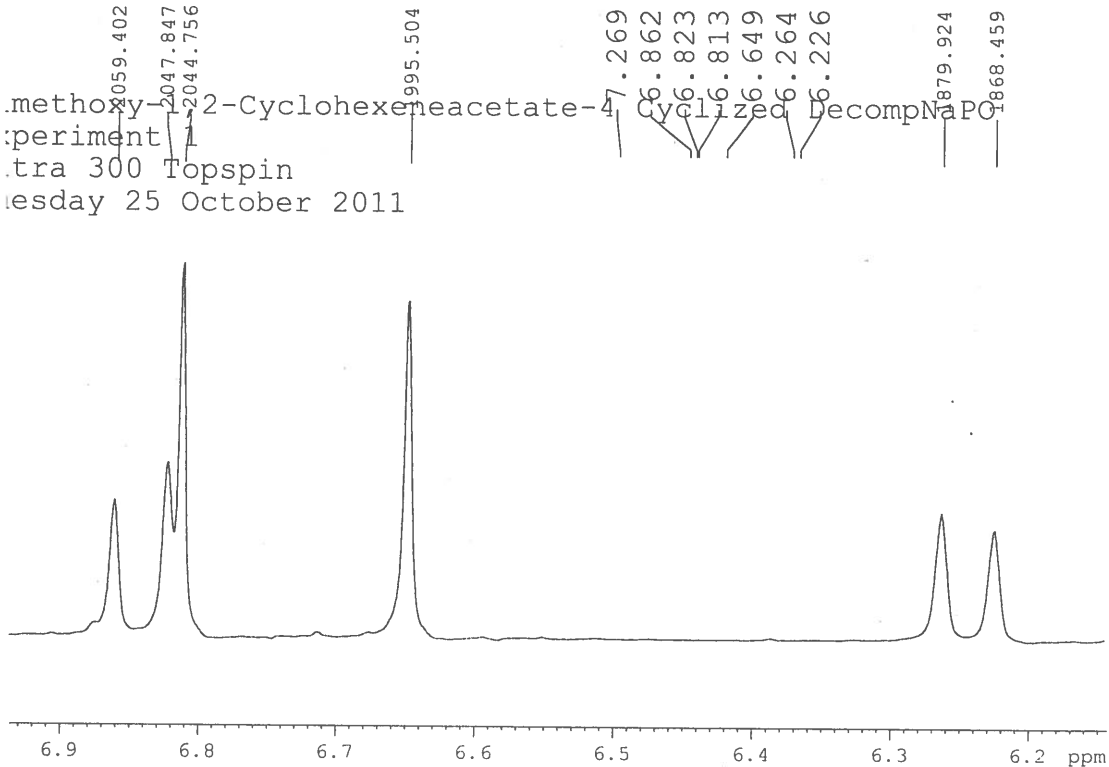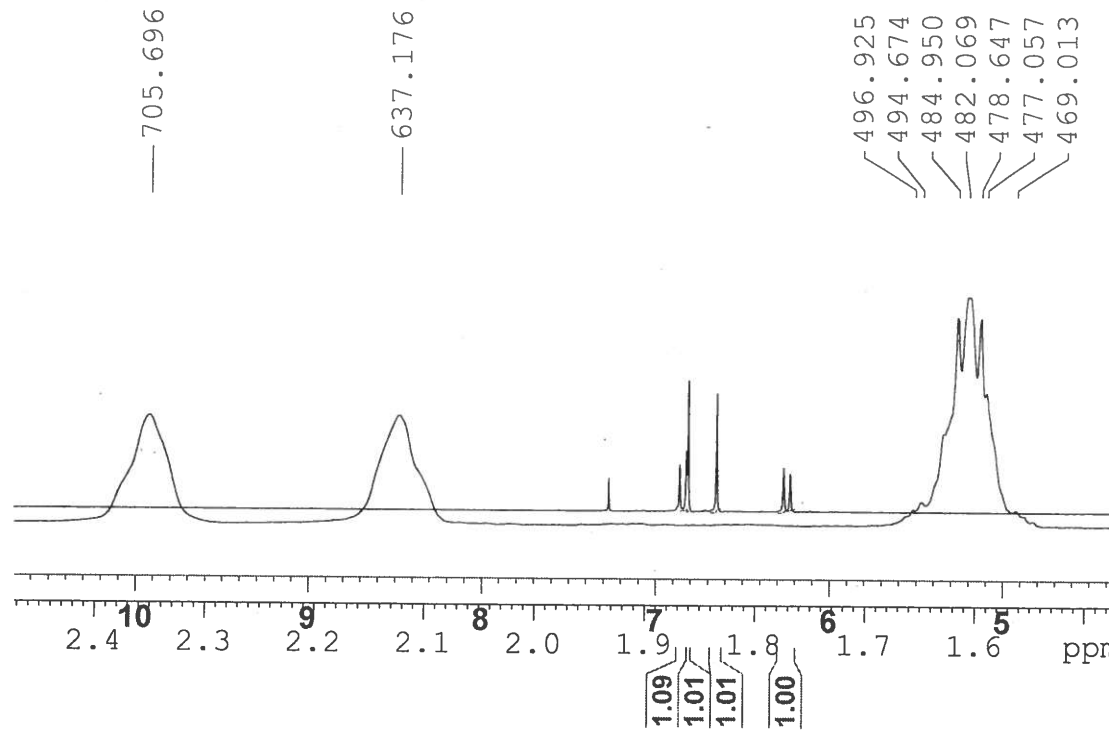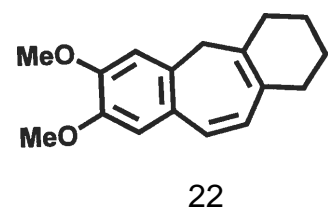

3.914  
 3.881  
 2.888  
 2.351  
 2.123  
 1.656  
 1.648  
 1.616  
 1.606  
 1.595  
 1.589  
 1.563

195.000  
 165.000  
 155.000  
 150.000  
 145.000  
 140.000  
 135.000  
 130.000  
 125.000  
 120.000  
 115.000  
 110.000  
 105.000  
 100.000  
 95.000  
 90.000  
 85.000  
 80.000  
 75.000  
 70.000  
 65.000  
 60.000  
 55.000  
 50.000  
 45.000  
 40.000  
 35.000  
 30.000  
 25.000  
 20.000  
 15.000  
 10.000  
 5.000  
 0.000

methoxy-1,2-Cyclohexeneacetate-4 Cyclized DecompNaPO  
Experiment 2  
Pultra 300 Topspin  
Wednesday 25 October 2011

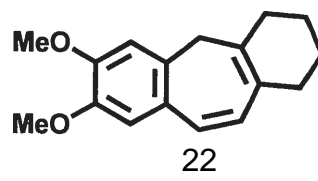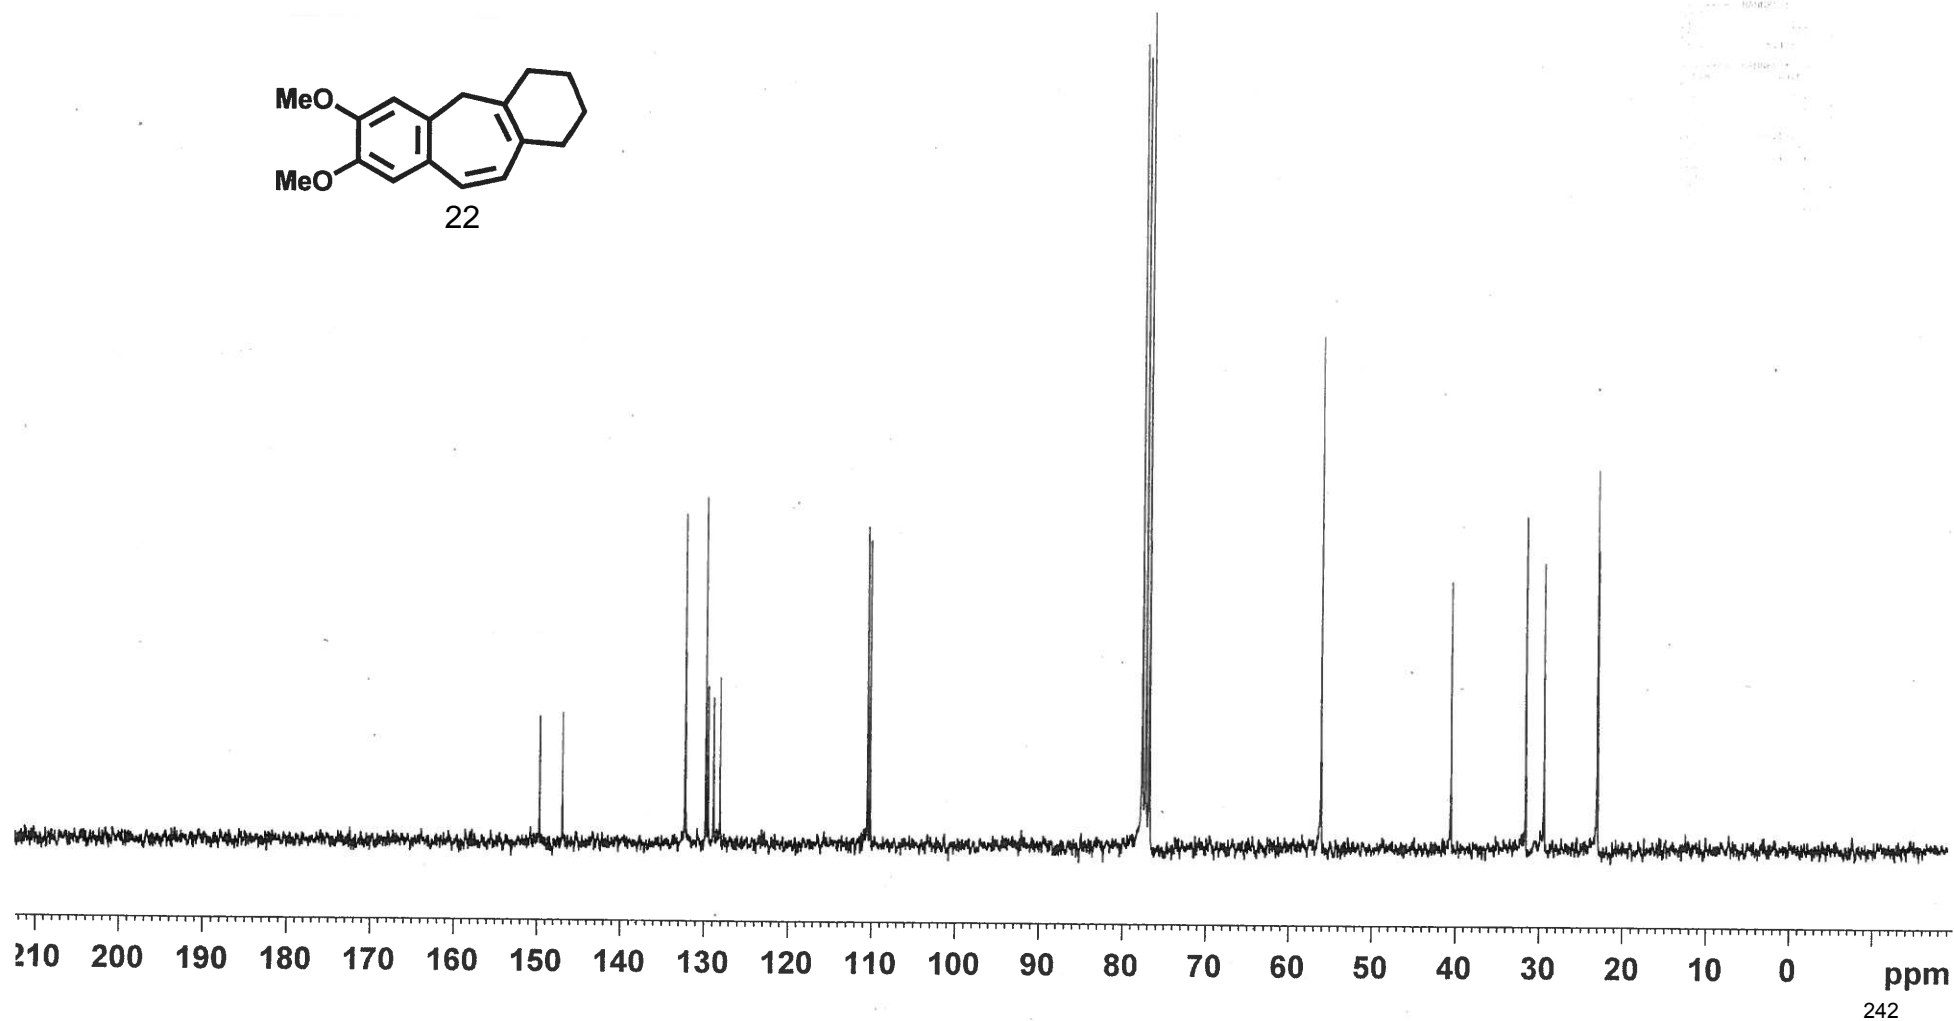

Dioxane bicycle  
Monday 22 July 2013  
Experiment 1 Topspin 500 V3.2

Current Data Parameters  
NAME Dioxane bicycle  
EXPNO 1  
PROCNO 1

F2 - Acquisition Parameters  
Date\_ 20130722  
Time 21.43  
INSTRUM spect  
PROBHD 5 mm PABBO BB/  
PULPROG zg30  
TD 65536  
SOLVENT CDC13  
NS 8  
DS 2  
SWH 10000.000 Hz  
FIDRES 0.152588 Hz  
AQ 3.2767999 sec  
RG 43.34  
DW 50.000 usec  
DE 6.50 usec  
TE 294.7 K  
D1 1.00000000 sec  
TD0 1

\*\*\*\*\* CHANNEL f1 \*\*\*\*\*  
SFO1 500.1330885 MHz  
NUC1 1H  
P1 12.06 usec  
PLW1 18.00000000 W

F2 - Processing parameters  
SI 65536  
SF 500.1300064 MHz  
WDW EM  
SSB 0  
LB 0.20 Hz  
GB 0  
PC 1.00

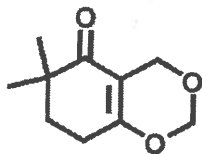

23

— 7.270

— 5.107

4.394

4.390

4.387

2.438

2.434

2.430

2.425

2.422

2.418

2.413

2.409

2.405

1.824

1.811

1.798

1.096

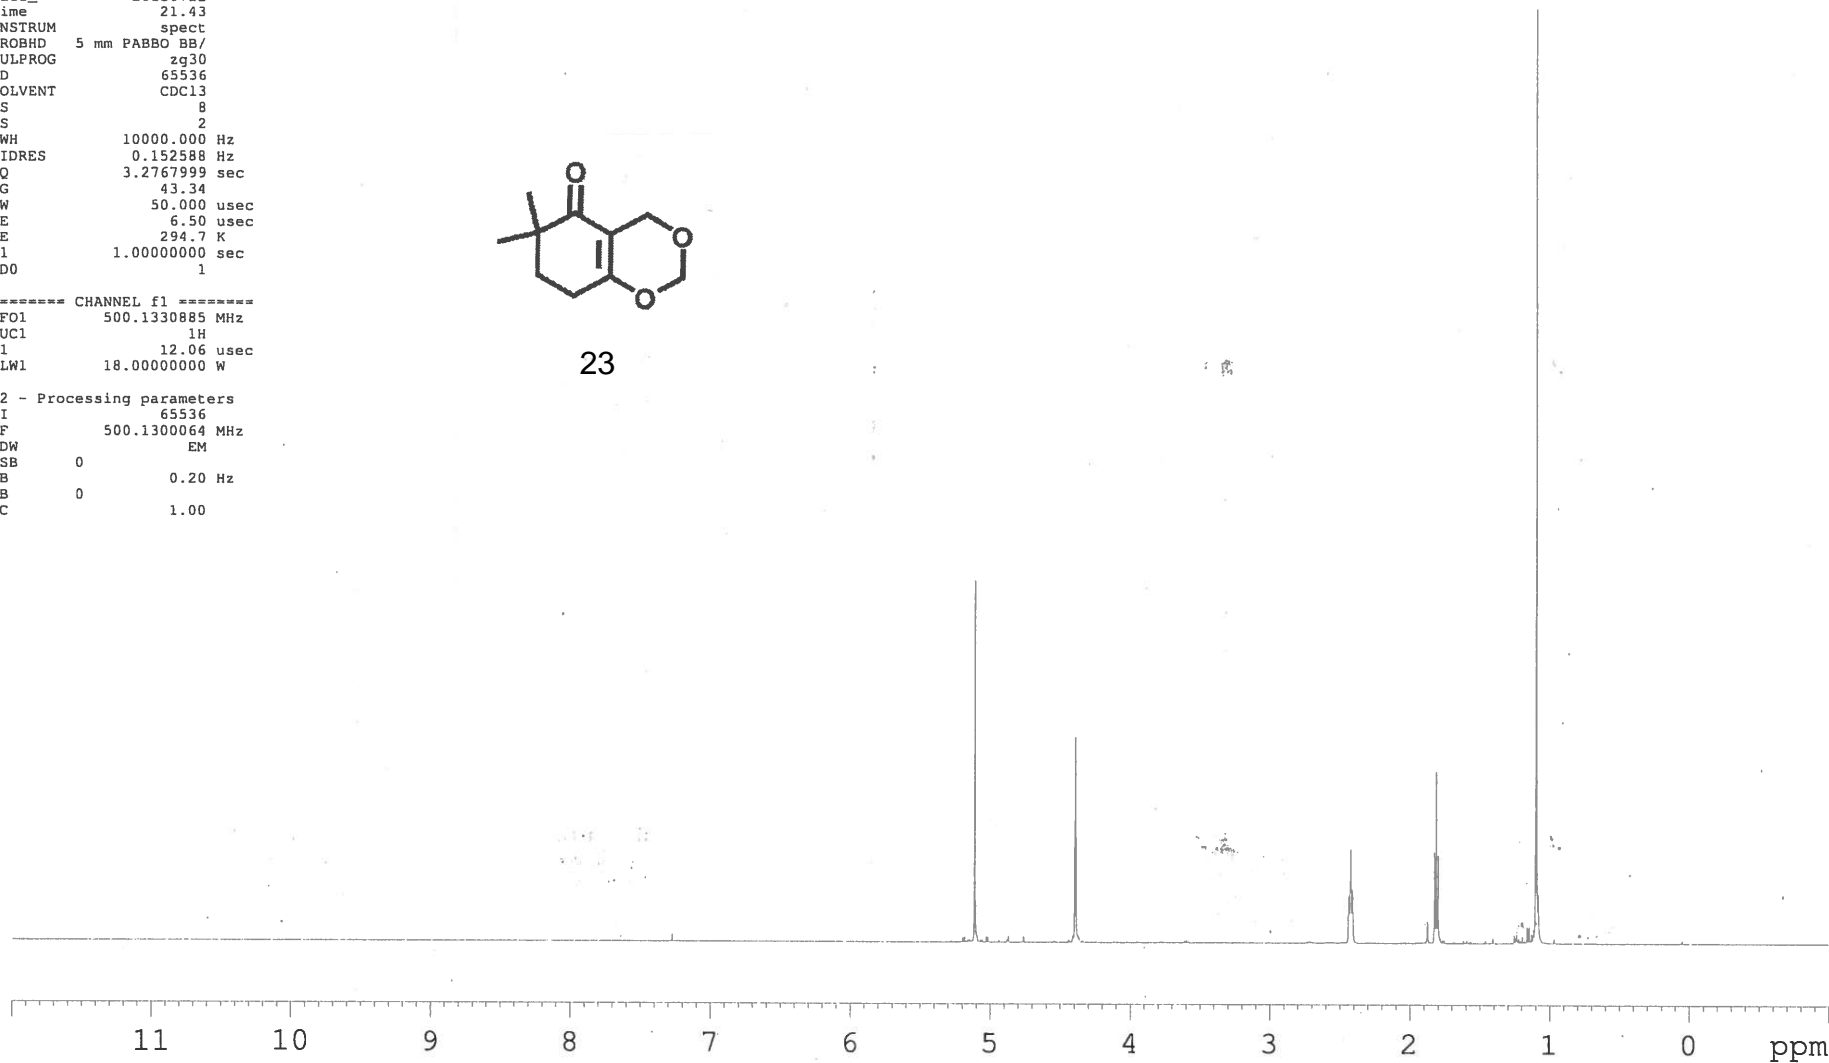

2.000

2.010

2.052

2.069

6.256

Dioxane Bicycle 13C  
 Topspin 500 V3.2  
 Experiment 1  
 Monday 22 July 2013

—201.159

—168.223

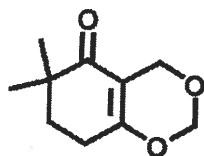

23

—109.704

—91.272

77.325

77.070

76.816

—63.181

—40.065

—34.276

24.811

24.430

Current Data Parameters  
 NAME Dioxane bicycle 13C  
 EXPNO 1  
 PROCNO 1

F2 - Acquisition Parameters  
 Date\_ 20130722  
 Time 21.58  
 INSTRUM spect  
 PROBHD 5 mm PABBO BB/  
 PULPROG zgpg30  
 TD 65536  
 SOLVENT CDC13  
 NS 11  
 DS 4  
 SWH 29761.904 Hz  
 FIDRES 0.454131 Hz  
 AQ 1.1010048 sec  
 RG 203.82  
 DW 16.800 usec  
 DE 6.50 usec  
 TE 295.2 K  
 D1 2.00000000 sec  
 D11 0.03000000 sec  
 TD0 1

===== CHANNEL f1 =====  
 SF01 125.7703637 MHz  
 NUC1 13C  
 P1 9.50 usec  
 PLW1 66.48200226 W

===== CHANNEL f2 =====  
 SF02 500.1320005 MHz  
 NUC2 1H  
 CPDPRG[2] waltz16  
 PCPD2 80.00 usec  
 PLW2 12.23400021 W  
 PLW12 0.28826001 W  
 PLW13 0.18449000 W

F2 - Processing parameters  
 SI 32768  
 SF 125.7577890 MHz  
 WDW EM  
 SSB 0  
 LB 1.00 Hz  
 GB 0  
 PC 1.40

200

180

160

140

120

100

80

60

40

20

0

ppm



Dioxane + 3M HCl  
Topspin 500  
Experiment 1  
Monday 20 August 2012

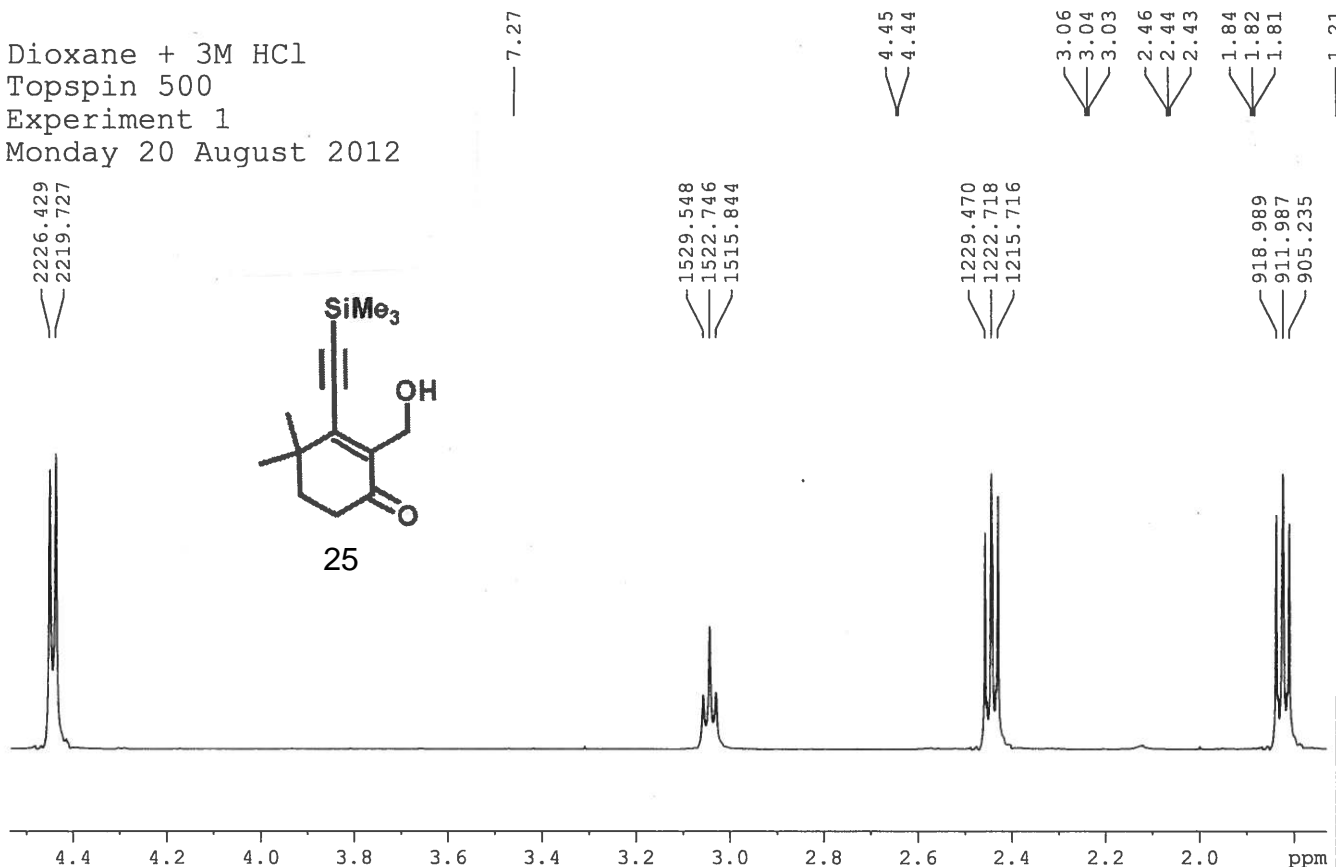

Current Data Parameters  
NAME Dioxane + 3M HCl  
EXPNO 1  
PROCNO 1

F2 - Acquisition Parameters  
Date\_ 20120820  
Time\_ 18.30  
INSTRUM spect  
PROBHD 5 mm PABBO BB/  
PULPROG zg30  
TD 65536  
SOLVENT CDCl3  
NS 8  
DS 2  
SWH 10000.000 Hz  
FIDRES 0.152588 Hz  
AQ 3.2767999 sec  
RG 27.82  
DW 50.000 usec  
DE 6.50 usec  
TE 295.0 K  
D1 1.00000000 sec  
TD0 1

===== CHANNEL f1 =====  
SFO1 500.1330885 MHz  
NUC1 1H  
P1 14.80 usec  
PLW1 12.23400021 W

F2 - Processing parameters  
SI 65536  
SF 500.1300085 MHz  
WDW EM  
SSB 0  
LB 0.25 Hz  
GB 0  
PC 1.00

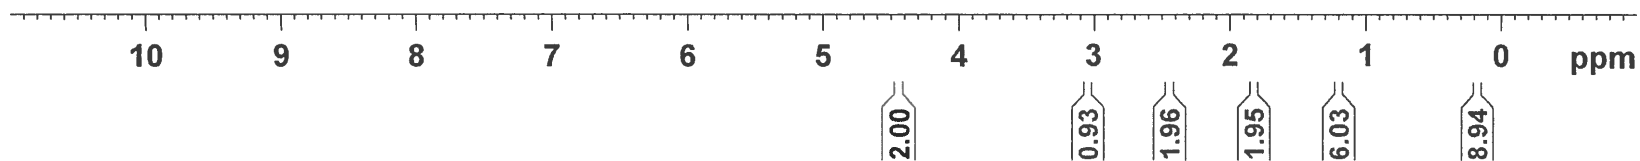

Dioxane + 3M HCl 13C  
 Topspin 500  
 Experiment 1  
 Monday 20 August 2012

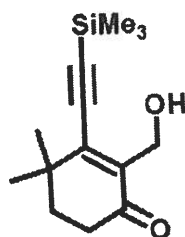

25

```

Current Data Parameters
NAME      Dioxane + 3M HCl 13C
EXPNO     1
PROCNO    1

F2 - Acquisition Parameters
Date_     20120820
Time      18.43
INSTRUM   spect
PROBHD    5 mm PABBO BB/
PULPROG   zgpg30
TD        65536
SOLVENT   CDCl3
NS        13
DS        4
SWH       29761.904 Hz
FIDRES    0.454131 Hz
AQ        1.1010048 sec
RG        203.82
DW        16.800 usec
DE        6.50 usec
TE        295.9 K
D1        2.00000000 sec
D11       0.03000000 sec
TD0       1

===== CHANNEL f1 =====
SFO1      125.7703637 MHz
NUC1      13C
P1        9.50 usec
PLW1      66.48200226 W

===== CHANNEL f2 =====
SFO2      500.1320005 MHz
NUC2      1H
CPDPRG[2  waltz16
PCPD2     80.00 usec
PLW2      12.23400021 W
PLW12     0.41870999 W
PLW13     0.26797000 W

F2 - Processing parameters
SI        32768
SF        125.7577890 MHz
WDW       EM
SSB       0
LB        1.00 Hz
GB        0
PC        1.40
  
```

197.74  
 148.059  
 139.227  
 113.046  
 99.822  
 77.387  
 77.131  
 76.877  
 60.605  
 35.805  
 35.349  
 34.185  
 27.396

200 180 160 140 120 100 80 60 40 20 ppm

Dioxane + 3M HCl -CCH<sub>3</sub>  
 Experiment 1 Topspin 2.500 3.1  
 Thursday 25 October 2012

1220.417  
 1213.716  
 1206.664

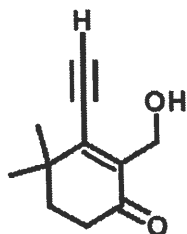

26

4.394

3.822

911.237  
 903.885  
 897.383

3.045

2.440  
 2.427  
 2.413

1.822  
 1.807  
 1.794

1.190

Current Data Parameters  
 NAME Dioxane + 3M HCl -CCH<sub>3</sub>  
 EXPNO 1  
 PROCNO 1

F2 - Acquisition Parameters  
 Date 20121025  
 Time 11.09  
 INSTRUM spect  
 PROBHD 5 mm PABBO BB/  
 PULPROG zg30  
 TD 65536  
 SOLVENT CDC13  
 NS 8  
 DS 2  
 SWH 10000.000 Hz  
 FIDRES 0.152588 Hz  
 AQ 3.2767999 sec  
 RG 27.82  
 DW 50.000 usec  
 DE 6.50 usec  
 TE 295.8 K  
 D1 1.00000000 sec  
 TD0 1

===== CHANNEL f1 =====  
 SFO1 500.1330885 MHz  
 NUC1 1H  
 P1 14.80 usec  
 PLW1 12.23400021 W

F2 - Processing parameters  
 SI 65536  
 SF 500.1300084 MHz  
 WDW no  
 SSB 0  
 LB 0 Hz  
 GB 0  
 PC 1.00

2.50 2.45 2.40 2.35 2.30 2.25 2.20 2.15 2.10 2.05 2.00 1.95 1.90 1.85 1.80 1.75 ppm

9 8 7 6 5 4 3 2 1 0 ppm

2.000

0.939

0.935

1.971

1.893

5.911

Dioxane + 3M HCl -CCH 13C  
 25 October 2012  
 Experiment 1 Topspin 300

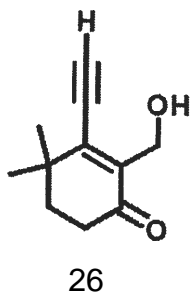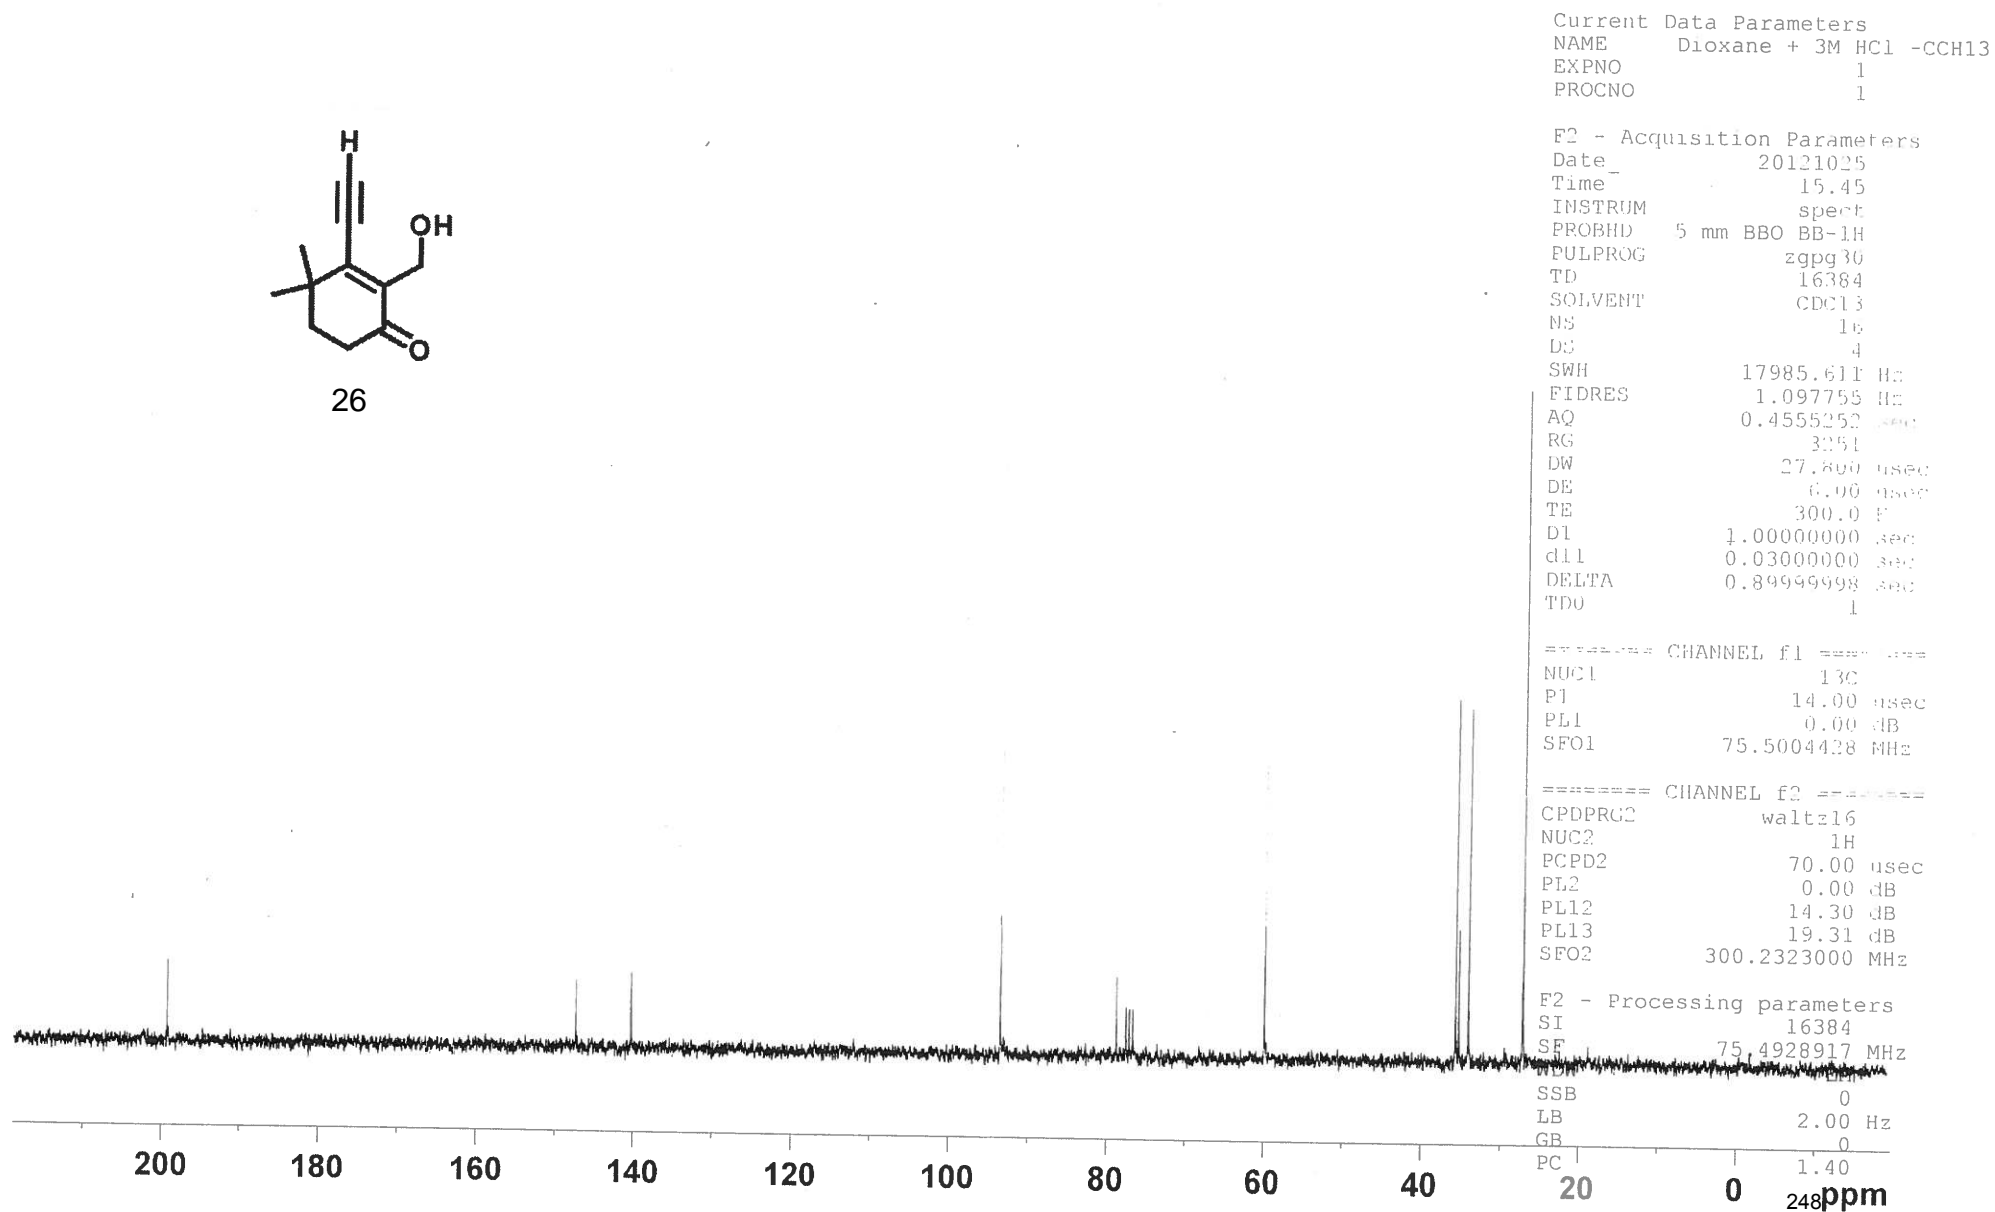

Anisole-isopropyl-2-iodo-  
Experiment 3 Topspin 500  
Wednesday 21 March 2012

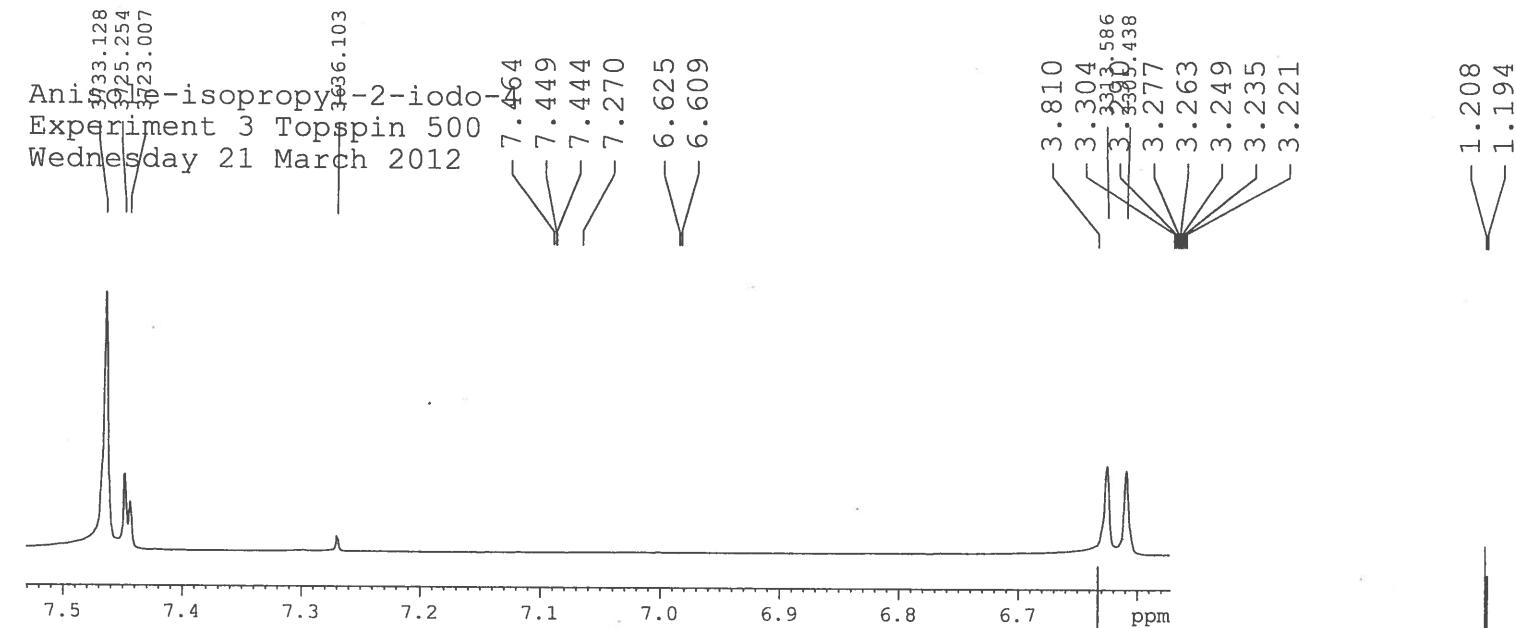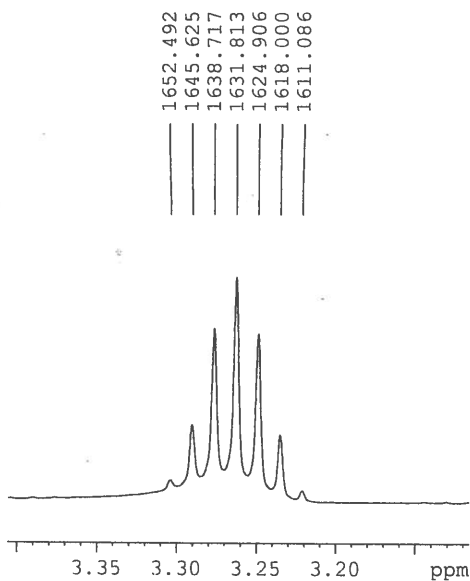

Current Data Parameters  
NAME Anisole-isopropyl-2-iodo-4  
EXPNO 3  
PROCNO 1

F2 - Acquisition Parameters  
Date\_ 20120321  
Time 12.18  
INSTRUM spect  
PROBHD 5 mm PABBO BB/  
PULPROG zg  
TD 65536  
SOLVENT MeOD  
NS 8  
DS 2  
SWH 10330.578 Hz  
FIDRES 0.157632 Hz  
AQ 3.1720407 sec  
RG 45.3  
DW 48.400 usec  
DE 6.50 usec  
TE 298.2 K  
D1 1.00000000 sec  
TDO 1

===== CHANNEL f1 =====  
NUC1 1H  
P1 10.00 usec  
PL1 0.00 dB  
SFO1 500.1330880 MHz

F2 - Processing parameters  
SI 65536  
SF 500.1300190 MHz  
WDW EM  
SSB 0  
LB 0.25 Hz  
GB 0  
PC 1.00

Anisole-isopropyl-2-iodo-4 <sup>13</sup>C  
Experiment 2 Topspin 500  
Wednesday 21 March 2012

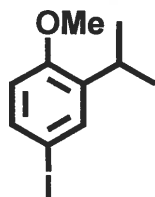

27

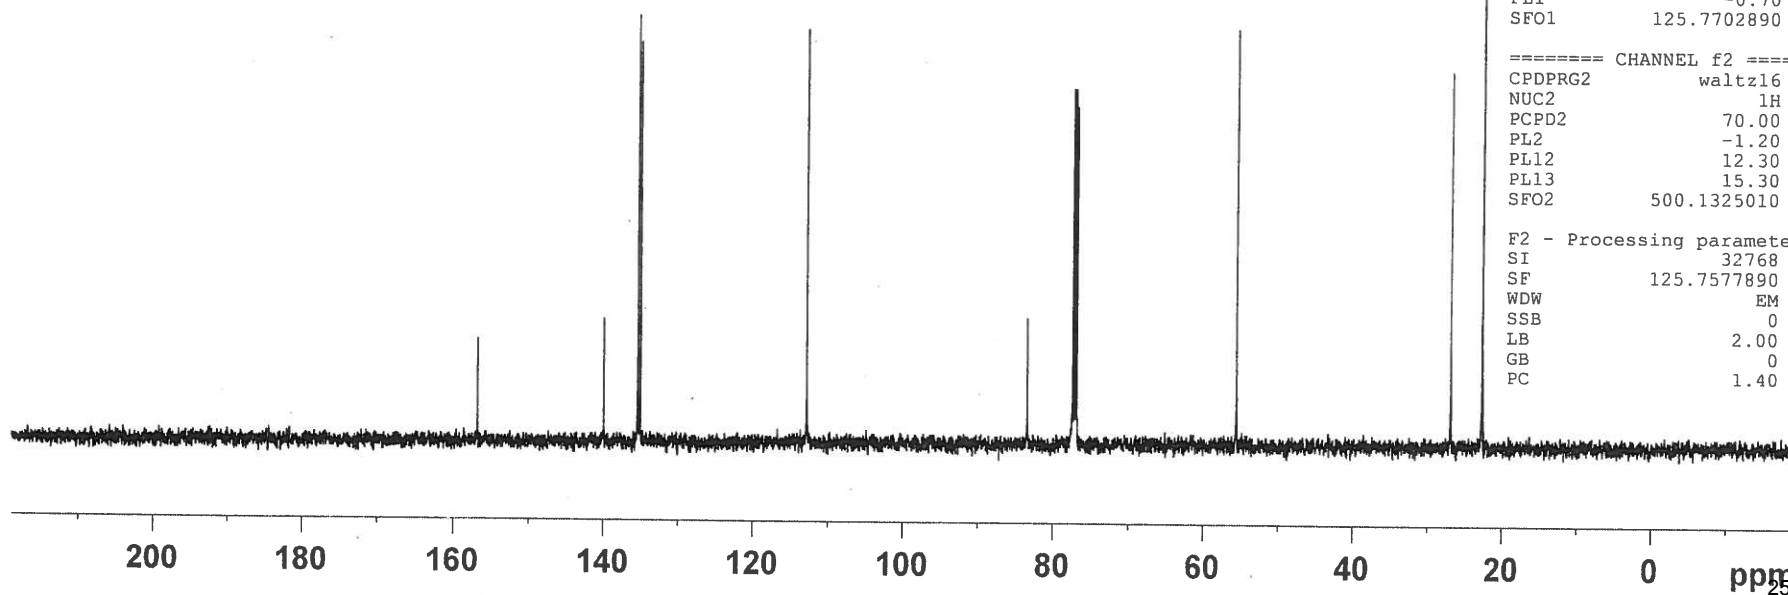

Current Data Parameters  
NAME Anisole-isopropyl-2-iodo-4 <sup>13</sup>C  
EXPNO 2  
PROCNO 1

F2 - Acquisition Parameters  
Date 20120321  
Time 13.15  
INSTRUM spect  
PROBHD 5 mm PABBO BB/  
PULPROG zgpg30  
TD 16384  
SOLVENT CDCl3  
NS 167  
DS 4  
SWH 30030.029 Hz  
FIDRES 1.832888 Hz  
AQ 0.2728603 sec  
RG 1024  
DW 16.650 usec  
DE 6.50 usec  
TE 300.2 K  
D1 1.00000000 sec  
d11 0.03000000 sec  
DELTA 0.89999998 sec  
TD0 1

===== CHANNEL f1 =====  
NUC1 <sup>13</sup>C  
P1 9.50 usec  
PL1 -0.70 dB  
SFO1 125.7702890 MHz

===== CHANNEL f2 =====  
CPDPRG2 waltz16  
NUC2 <sup>1</sup>H  
PCPD2 70.00 usec  
PL2 -1.20 dB  
PL12 12.30 dB  
PL13 15.30 dB  
SFO2 500.1325010 MHz

F2 - Processing parameters  
SI 32768  
SF 125.7577890 MHz  
WDW EM  
SSB 0  
LB 2.00 Hz  
GB 0  
PC 1.40

isole-Isopropyl-2-TMS  
 pspin ULtra 300  
 perim  
 nday

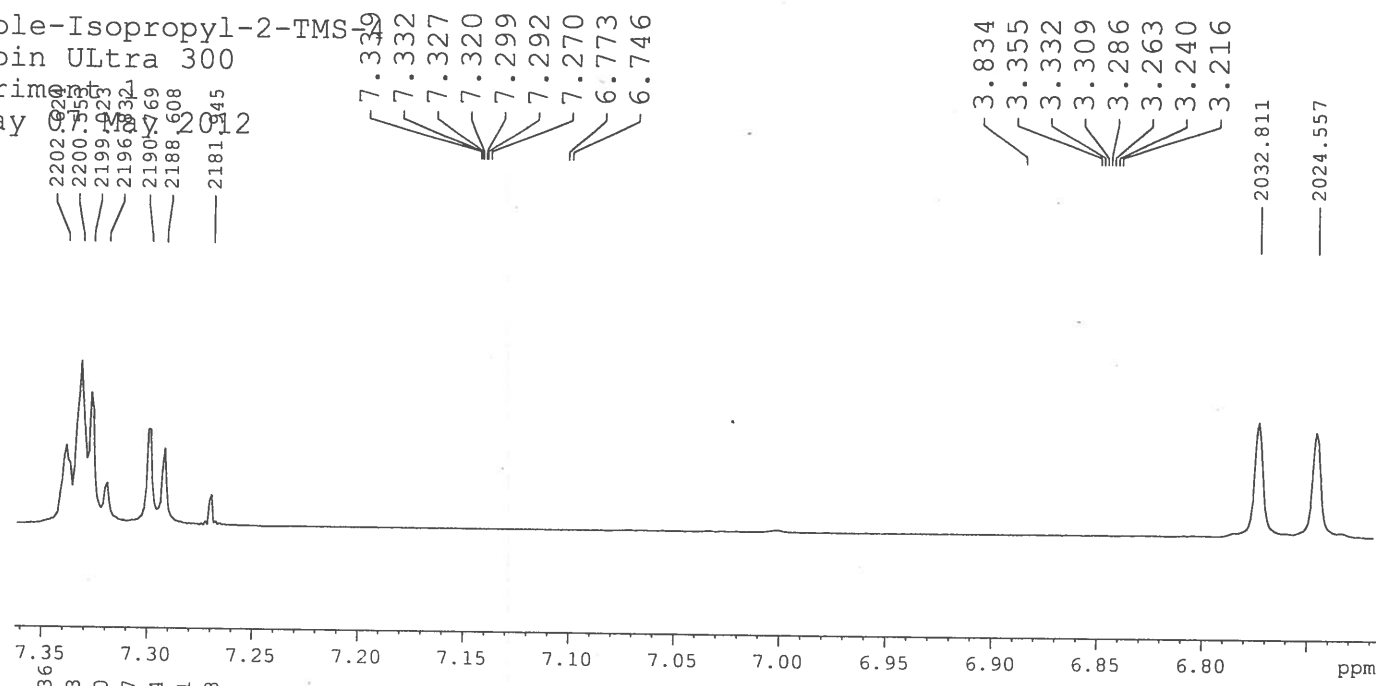

NAME Anisole-Isopropyl-2-TMS-4  
 EXPNO 1  
 PROCNO 1  
 Date\_ 20120507  
 Time 19.16  
 INSTRUM spect  
 PROBHD 5 mm PABBO BB-  
 PULPROG zg30  
 TD 16384  
 SOLVENT CDCl3  
 NS 8  
 DS 2  
 SWH 4789.272 Hz  
 FIDRES 0.292314 Hz  
 AQ 1.7105396 sec  
 RG 114  
 DW 104.400 usec  
 DE 6.00 usec  
 TE 294.6 K  
 D1 1.00000000 sec  
 TD0 1

===== CHANNEL f1 =====  
 NUC1 1H  
 P1 11.90 usec  
 PL1 0.00 dB  
 SFO1 300.1315007 MHz  
 S1 16384  
 SF 300.1300123 MHz  
 W1W no  
 SSB 0  
 LB 0.00 Hz  
 GB 0  
 Fc 1.00

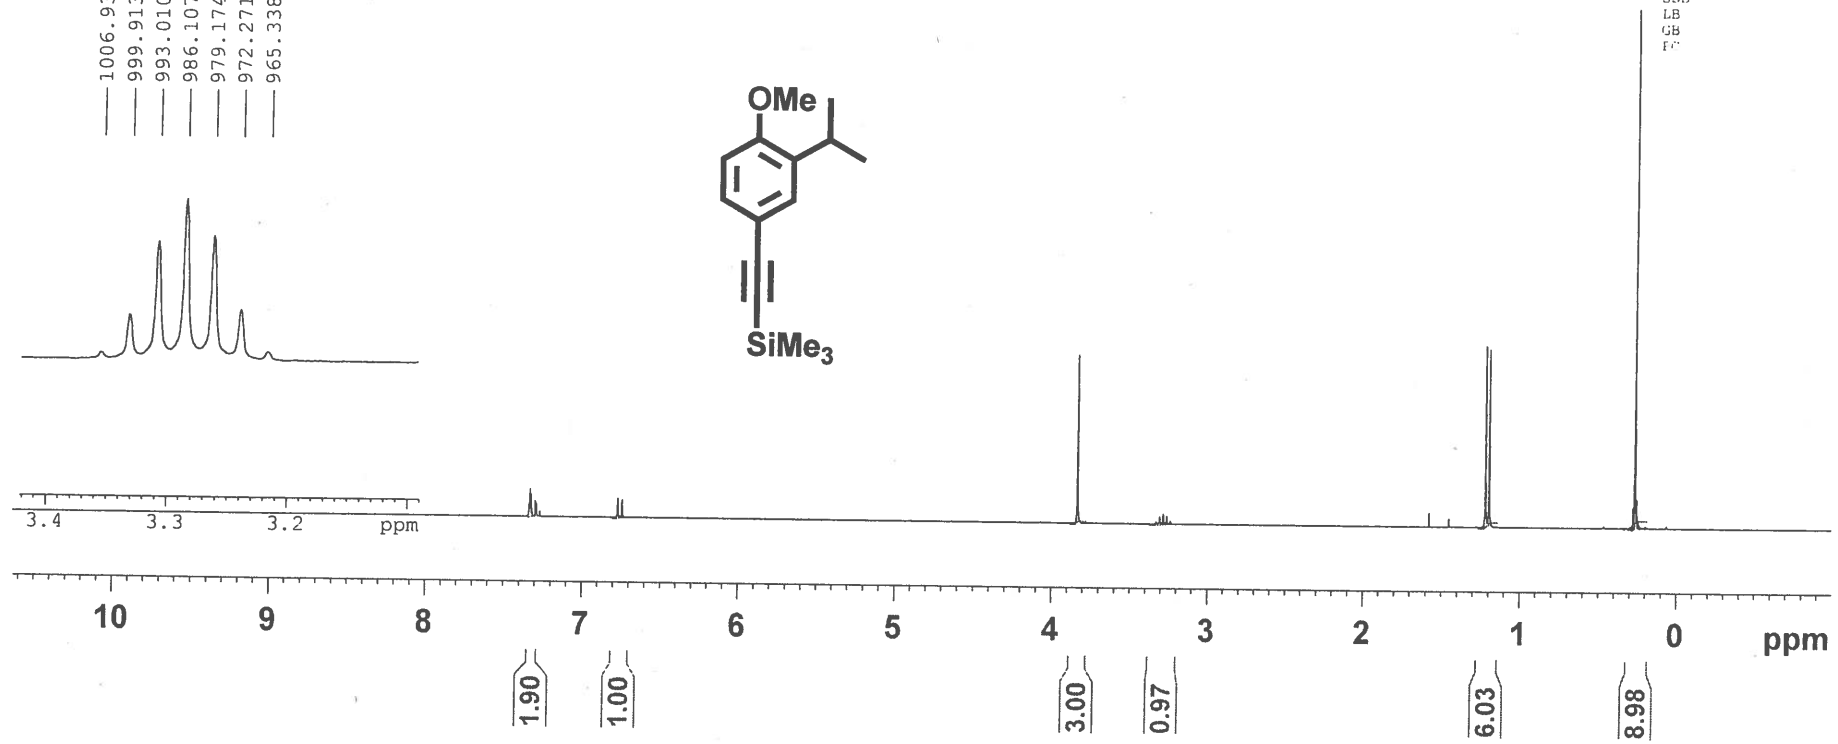

Anisole-Isopropyl-2-TMS-4 13C  
 mpspin Ultra 300  
 Experiment 1  
 Monday 07 May 2012

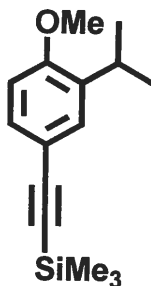

```

NAME      Anisole-Isopropyl-2-TMS-4 13C
EXPNO     1
PROCNO    1
Date_     20120507
Time      19.55
INSTRUM    spect
PROBHD     5 mm PABBO BB-
PULPROG    zgpg30
TD         16384
SOLVENT    CDCl3
NS         262
DS         4
SWH        17985.611 Hz
FIDRES     1.097755 Hz
AQ         0.4555252 sec
RG         20642.5
DW         27.800 usec
DE         6.00 usec
TE         295.0 K
D1         1.00000000 sec
D11        0.03000000 sec
TDO        1
  
```

```

===== CHANNEL f1 =====
NUC1       13C
P1         11.25 usec
PL1        0.00 dB
SFO1       75.4752953 MHz
  
```

```

===== CHANNEL f2 =====
CPDPRG2    waltz16
NUC2       1H
PCPD2      80.00 usec
PL2        0.00 dB
PL12       16.55 dB
PL13       24.00 dB
SFO2       300.1312005 MHz
S1         8192
SF         75.4677423 MHz
WDW        EM
SSB        0
LB         2.50 Hz
GB         0
PC         1.40
  
```

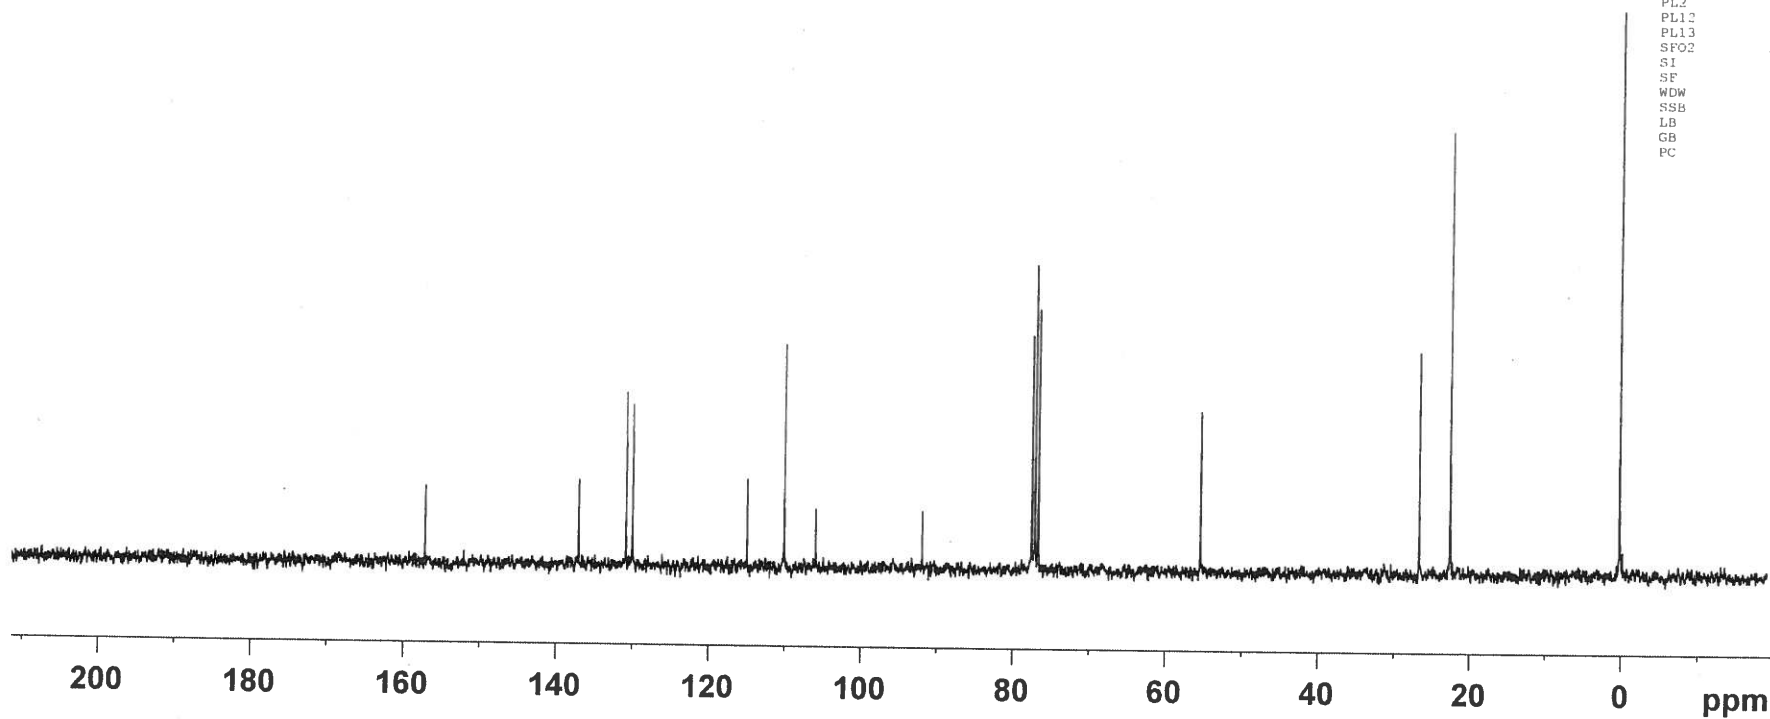



Anisole-isopropyl-2-CCH

Experiment 2

Topspin

Tu 16 Jun 2012

May 2012

3635.548

7.414  
7.410  
7.381  
7.377  
7.364  
7.360  
7.269  
6.813  
6.796

3.853  
3.384  
3.370  
3.356  
3.342  
3.329  
3.315  
3.301  
3.045  
3407.219  
3398.809

1.262  
1.248

Current Data Parameters  
NAME Anisole-isopropyl-2-CCH-  
EXPNO 2  
PROCNO 1

F2 - Acquisition Parameters  
Date\_ 20120501  
Time\_ 16.44  
INSTRUM spect  
PROBHD 5 mm PABBO BB/  
PULPROG zg  
TD 65536  
SOLVENT MeOD  
NS 8  
DS 2  
SWH 10330.578 Hz  
FIDRES 0.157632 Hz  
AQ 3.1720407 sec  
RG 11.3  
DW 48.400 usec  
DE 6.50 usec  
TE 296.2 K  
D1 1.00000000 sec  
TD0 1

===== CHANNEL f1 =====  
NUC1 1H  
P1 10.00 usec  
PL1 0.00 dB  
SFO1 500.1330880 MHz

F2 - Processing parameters  
SI 65536  
SF 500.1300193 MHz  
WDW no  
SSB 0  
LB 0.00 Hz  
GB 0  
PC 1.00

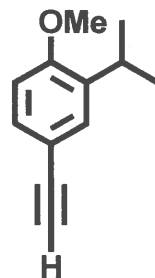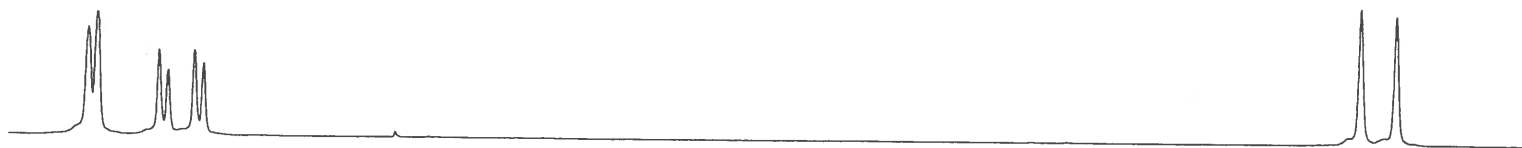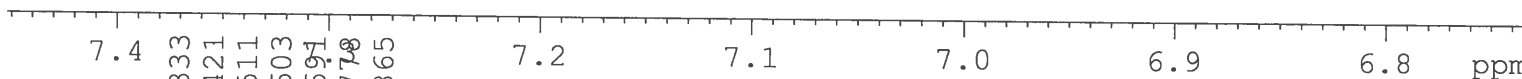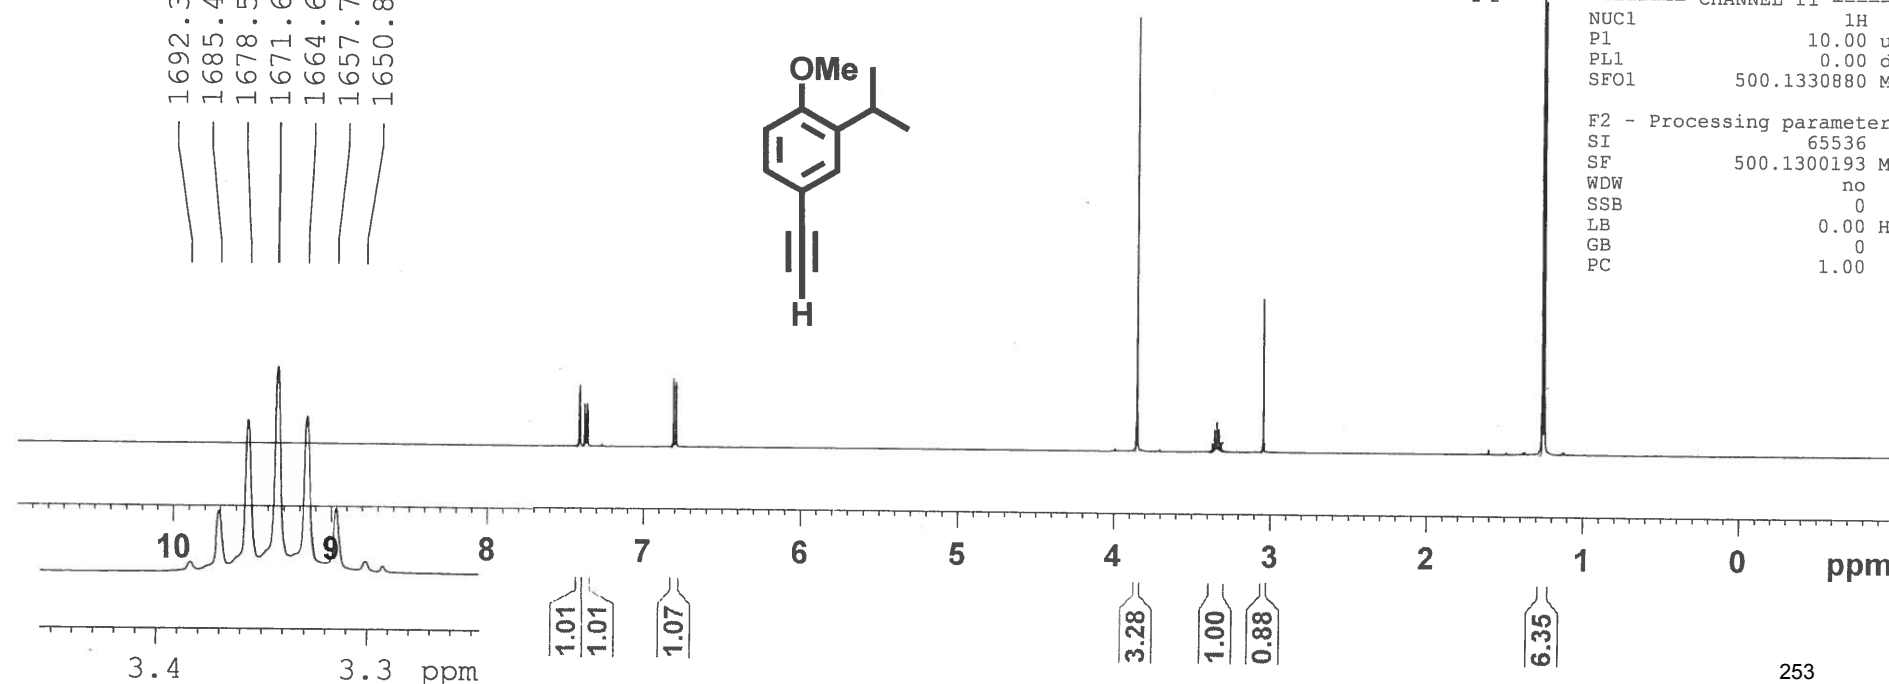

Anisole-isopropyl-2-CCH-4 13C  
Experiment 1  
Topspin 500  
Tuesday 01 May 2012

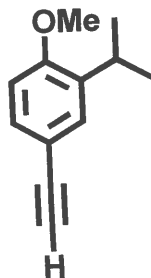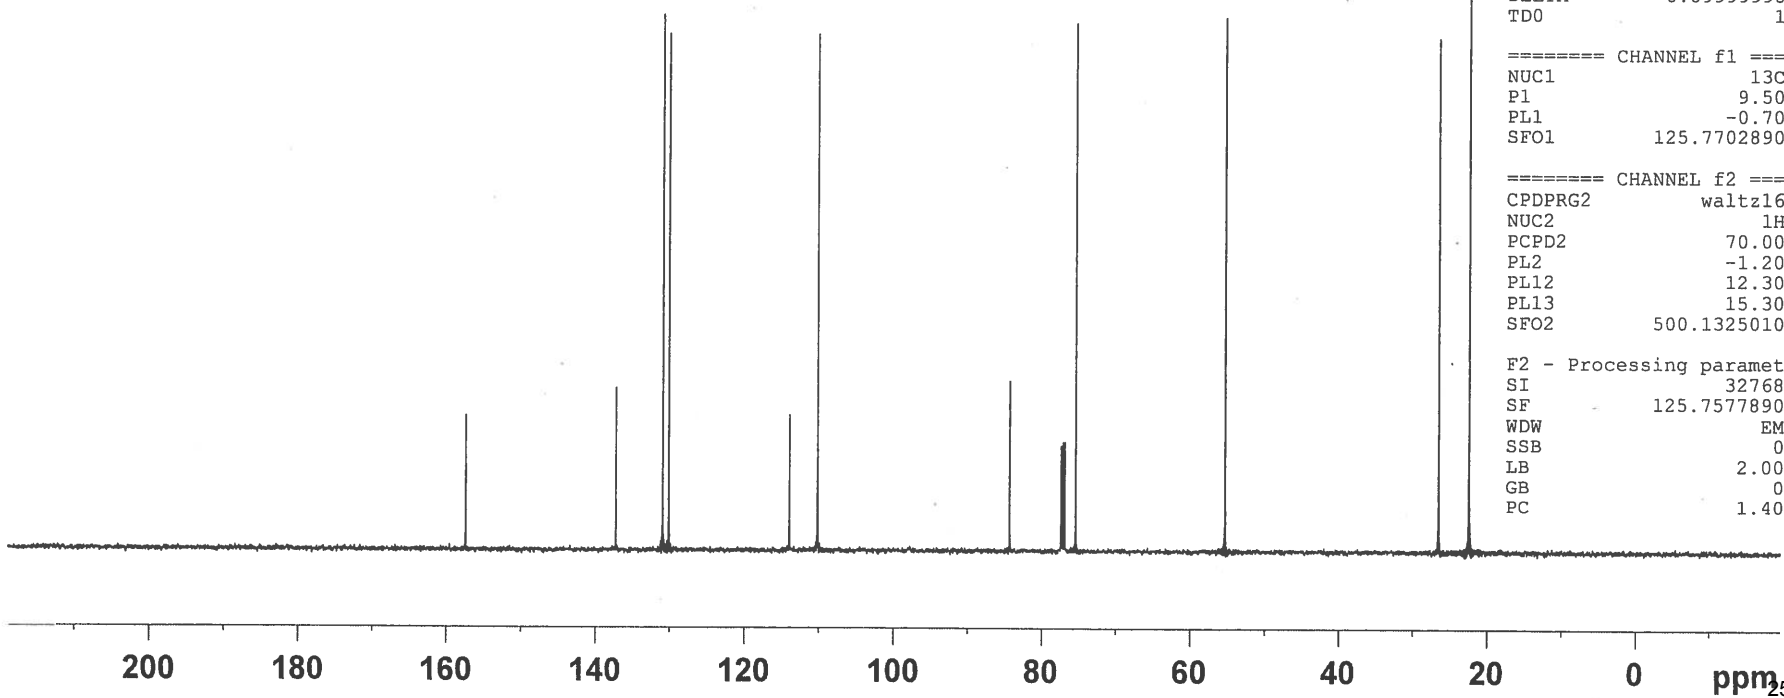

Current Data Parameters  
NAME Anisole-isopropyl-2-CCH-4 13C  
EXPNO 1  
PROCNO 1

F2 - Acquisition Parameters  
Date\_ 20120501  
Time 16.53  
INSTRUM spect  
PROBHD 5 mm PABBO BB/  
PULPROG zgpg30  
TD 16384  
SOLVENT CDCl3  
NS 77  
DS 4  
SWH 30030.029 Hz  
FIDRES 1.832888 Hz  
AQ 0.2728603 sec  
RG 4096  
DW 16.650 usec  
DE 6.50 usec  
TE 297.2 K  
D1 1.00000000 sec  
d11 0.03000000 sec  
DELTA 0.89999998 sec  
TD0 1

===== CHANNEL f1 =====  
NUC1 13C  
P1 9.50 usec  
PL1 -0.70 dB  
SFO1 125.7702890 MHz

===== CHANNEL f2 =====  
CPDPRG2 waltz16  
NUC2 1H  
PCPD2 70.00 usec  
PL2 -1.20 dB  
PL12 12.30 dB  
PL13 15.30 dB  
SFO2 500.1325010 MHz

F2 - Processing parameters  
SI 32768  
SF 125.7577890 MHz  
WDW EM  
SSB 0  
LB 2.00 Hz  
GB 0  
PC 1.40

Anisole-2-Isopropyl-4-CC-Cyclohexenone-Dimethyl-CH2OH

Experiment 4 Topspin

Wednesday 17 October

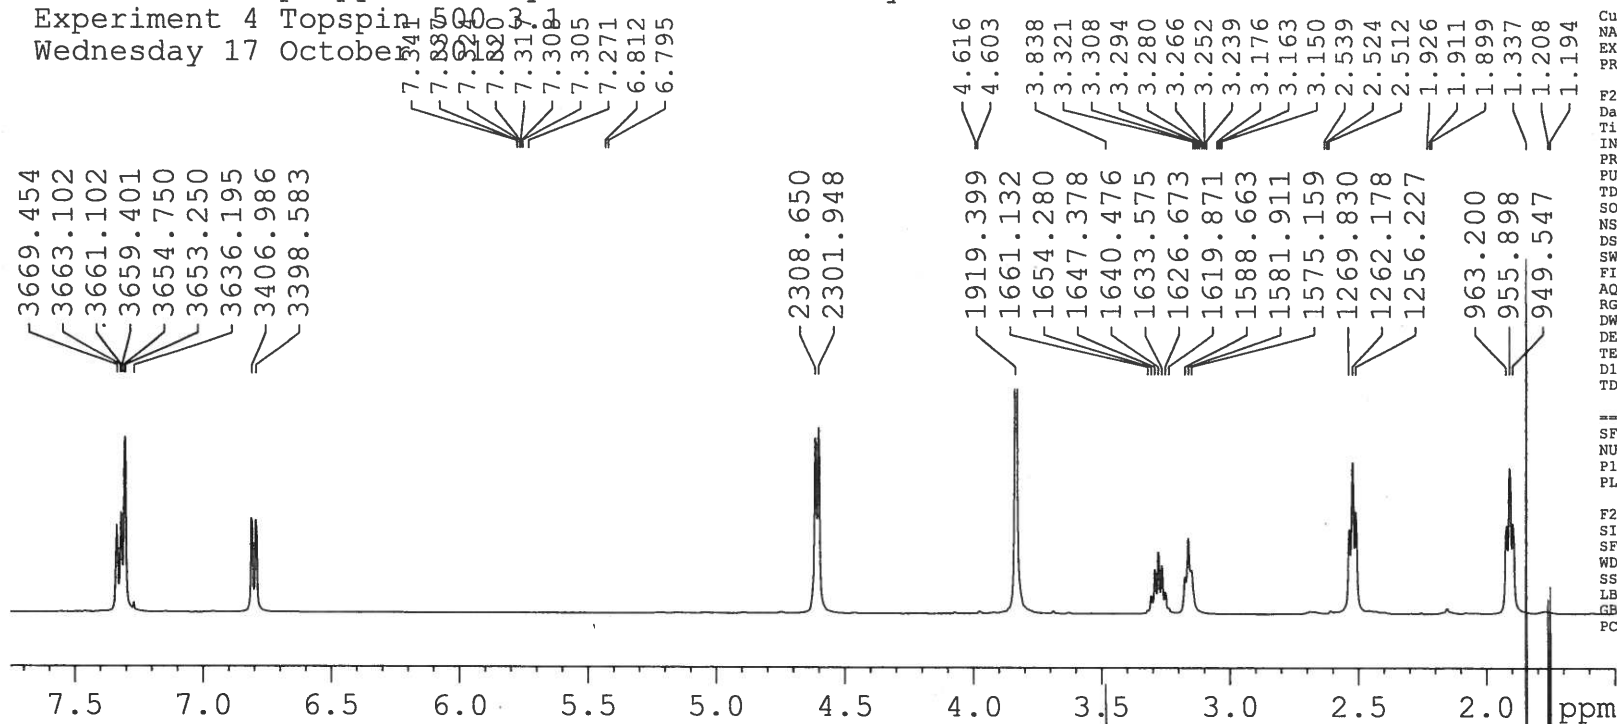

Current Data Parameters  
NAME Anisole-2-Isopropyl-4-CC-Cyclohex  
EXPNO 4  
PROCNO 1

F2 - Acquisition Parameters  
Date\_ 20121017  
Time 10.51  
INSTRUM spect  
PROBHD 5 mm PABBO BB/  
PULPROG zg30  
TD 65536  
SOLVENT CDC13  
NS 8  
DS 2  
SWH 10000.000 Hz  
FIDRES 0.152588 Hz  
AQ 3.2767999 sec  
RG 27.82  
DW 50.000 usec  
DE 6.50 usec  
TE 294.7 K  
D1 1.00000000 sec  
TD0 1

===== CHANNEL f1 =====  
SFO1 500.1330885 MHz  
NUC1 1H  
P1 14.80 usec  
PLW1 12.23400021 W

F2 - Processing parameters  
SI 65536  
SF 500.1300083 MHz  
WDW EM  
SSB 0  
LB 1.25 Hz  
GB 0  
PC 1.00

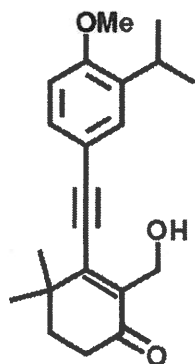

28

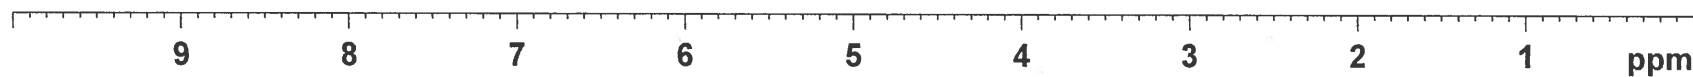

Anisole-2-Isopropyl-4-CC-Cyclohexenone-Dimethyl-CH<sub>2</sub>OH 13C  
 Experiment 2 Topspin 500 3.158116 14829 137057 13114 12380 11336 11036 10781 84.11 77.40 77.14 76.89 60.93 55.44 35.97 35.79 34.26 27.71 26.69 22.42  
 Wednesday 17 October 2012

Current Data Parameters  
 NAME Anisole-2-Isopropyl-4-CC-Cyclohexenone-Dimethyl-CH<sub>2</sub>OH 13C  
 EXPNO 2  
 PROCNO 1

F2 - Acquisition Parameters  
 Date\_ 20121017  
 Time 11.07  
 INSTRUM spect  
 PROBHD 5 mm PABBO BB/  
 PULPROG zgpg30  
 TD 65536  
 SOLVENT CDC13  
 NS 15  
 DS 4  
 SWH 29761.904 Hz  
 FIDRES 0.454131 Hz  
 AQ 1.1010048 sec  
 RG 203.82  
 DW 16.800 usec  
 DE 6.50 usec  
 TE 295.5 K  
 D1 2.00000000 sec  
 D11 0.03000000 sec  
 TDO 1

===== CHANNEL f1 =====  
 SFO1 125.7703637 MHz  
 NUC1 13C  
 P1 9.50 usec  
 PLW1 66.48200226 W

===== CHANNEL f2 =====  
 SFO2 500.1320005 MHz  
 NUC2 1H  
 CPDPRG[2] waltz16  
 PCPD2 80.00 usec  
 PLW2 12.23400021 W  
 PLW12 0.41870999 W  
 PLW13 0.26797000 W

F2 - Processing parameters  
 SI 32768  
 SF 125.7577890 MHz  
 WDW EM  
 SSB 0  
 LB 1.00 Hz  
 GB 0  
 PC 1.40

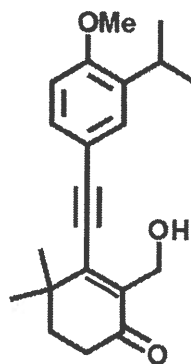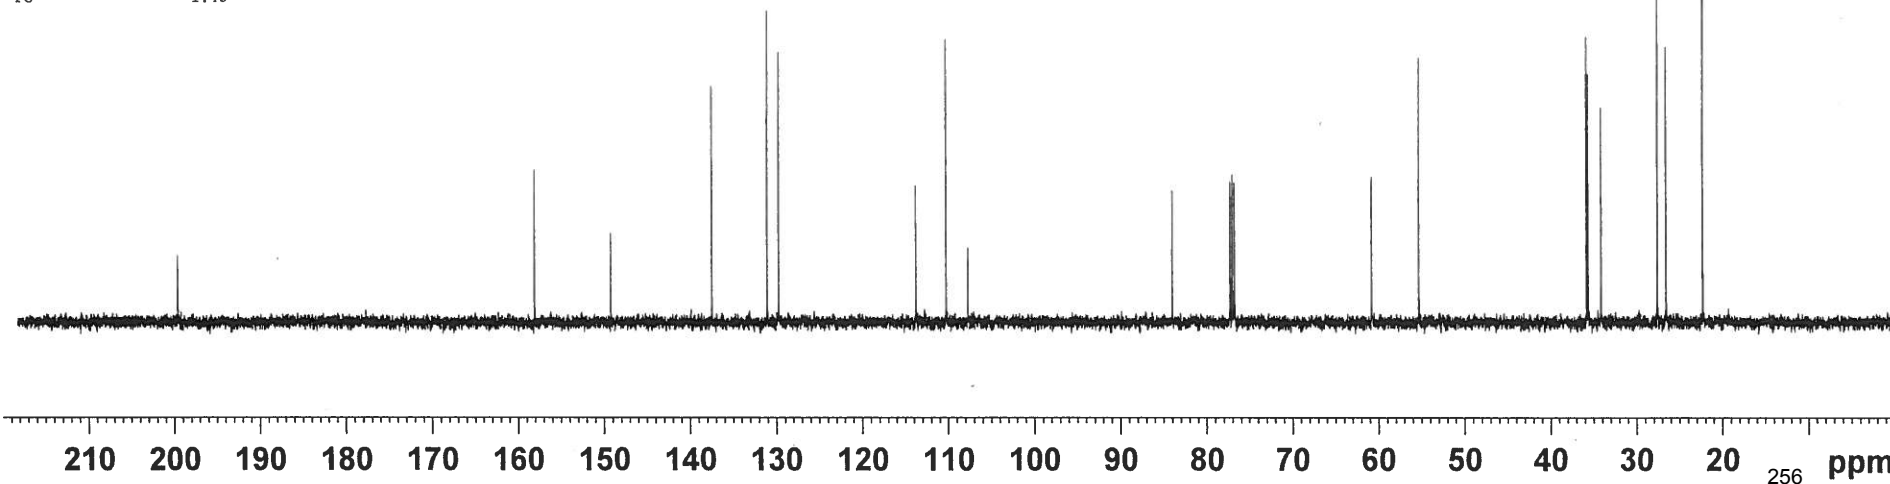

Anisole-2-Isopropyl-4-CC-1-cyclohexenone-Dimethyl-CH2OAc  
 Experiment 1 Topspin 500  
 Thursday 06 September 2012

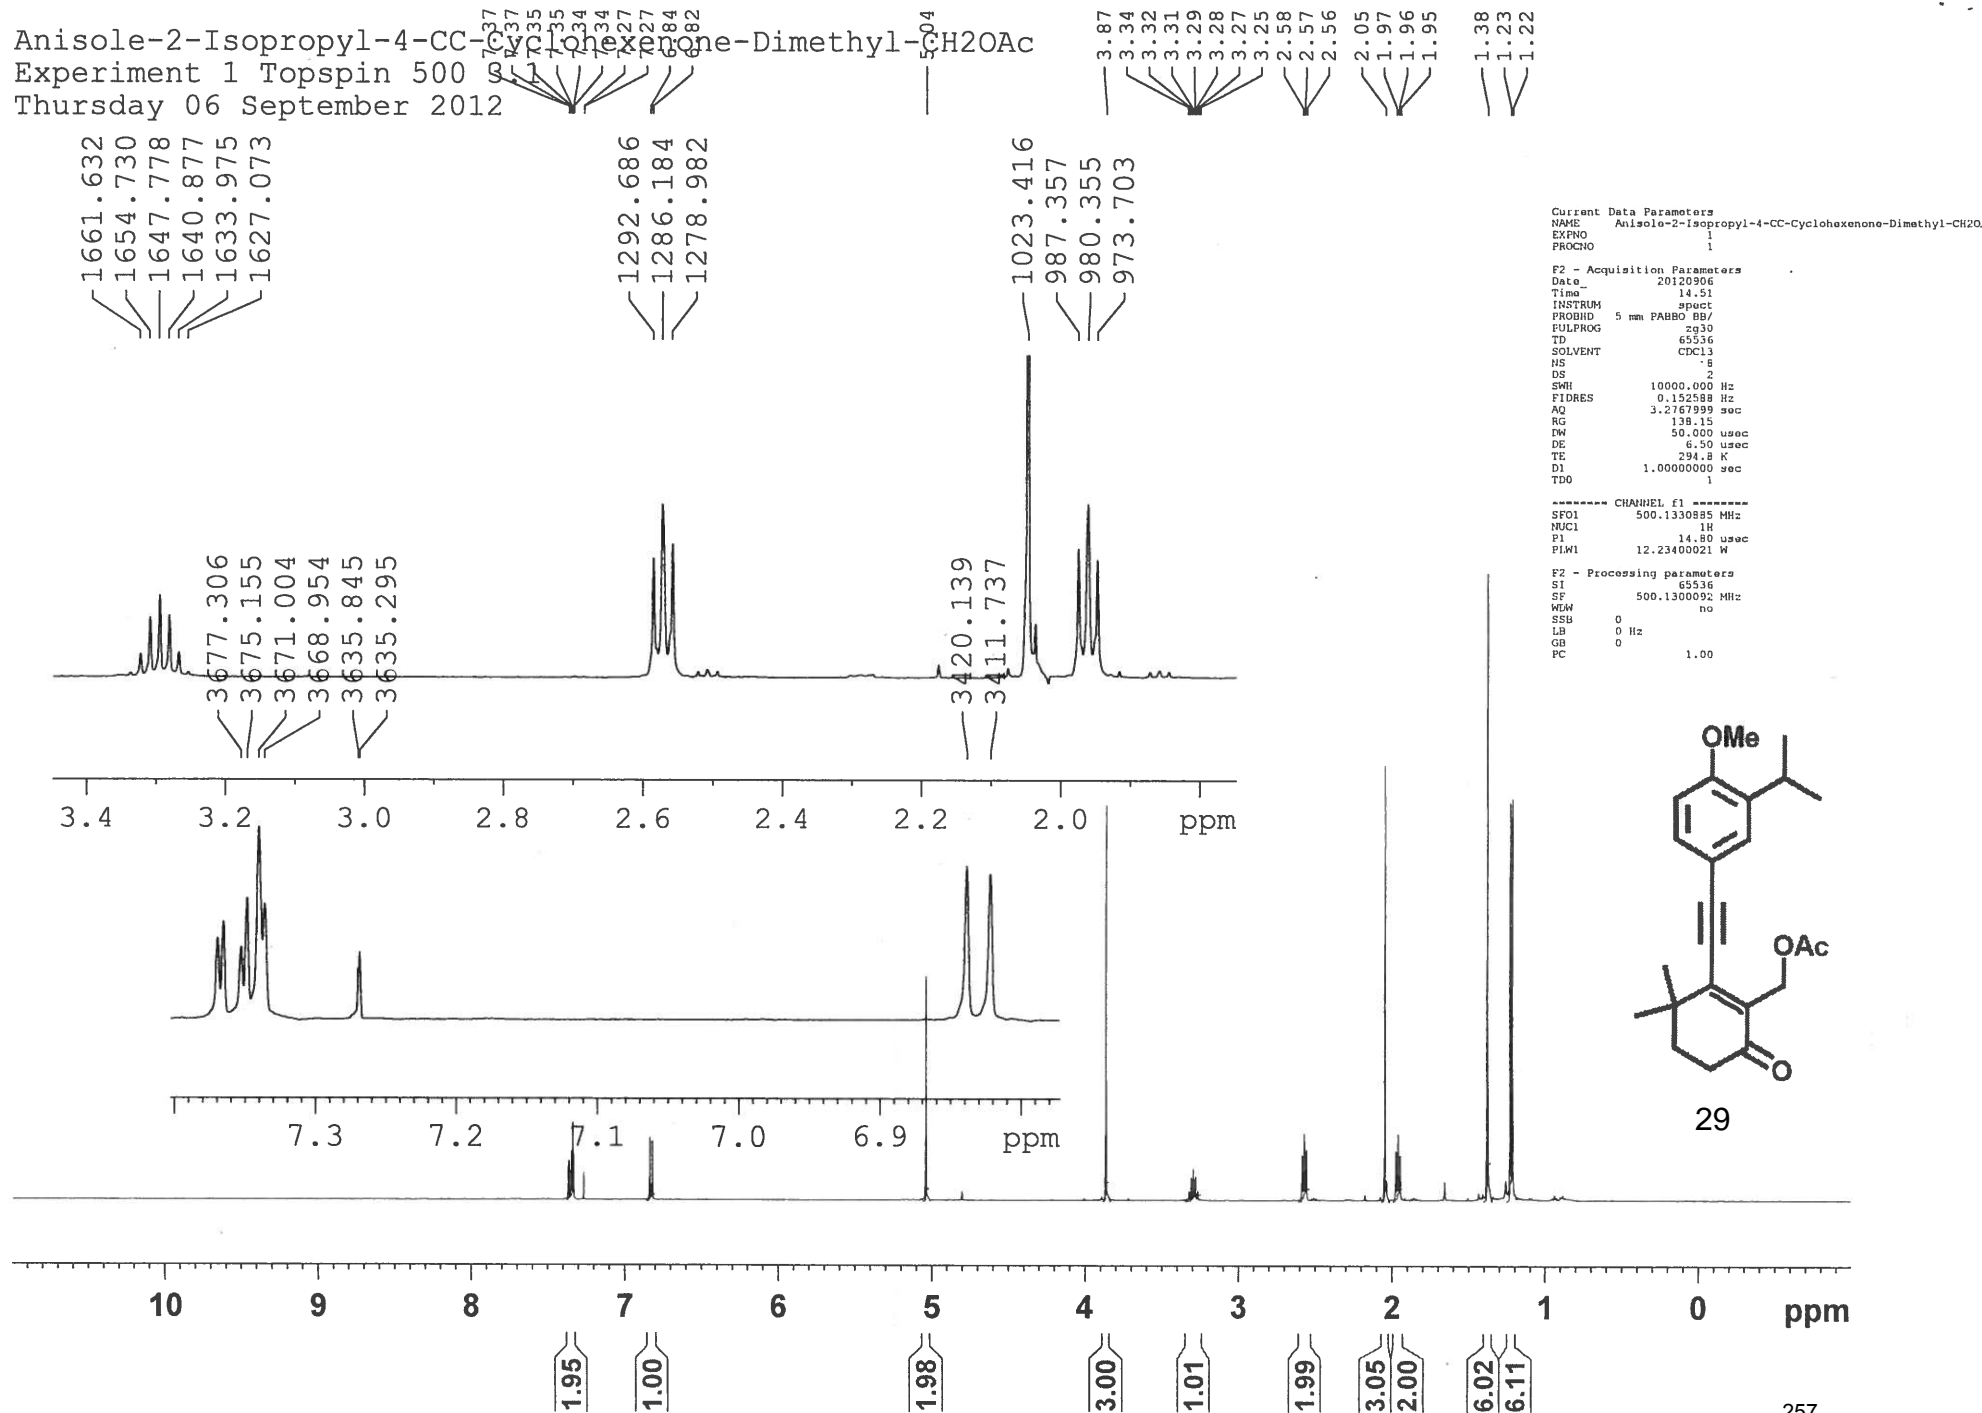

Anisole-2-Isopropyl-4-CC-cyclohexenone-Dimethyl-CH2OAc 13C  
 Experiment 2 Topspin 500  
 Thursday 25 October 2012

Current Data Parameters  
 NAME Anisole-2-Isopropyl-4-CC-cyclohexenone-Dimethyl-CH2OAc 13C  
 EXPNO 2  
 PROCNO 1

F2 - Acquisition Parameters  
 Date\_ 20121025  
 Time 15.18  
 INSTRUM spect  
 PROBHD 5 mm PABBO BB/  
 PULPROG zgpg30  
 TD 65536  
 SOLVENT CDCl3  
 NS 12  
 DS 4  
 SWH 29761.904 Hz  
 FIDRES 0.454131 Hz  
 AQ 1.1010048 sec  
 RG 203.82  
 DW 16.800 usec  
 DE 6.50 usec  
 TE 298.3 K  
 D1 2.00000000 sec  
 D11 0.03000000 sec  
 TD0 1

===== CHANNEL f1 =====  
 SFO1 125.7703637 MHz  
 NUC1 13C  
 P1 9.50 usec  
 PLW1 66.48200226 W

===== CHANNEL f2 =====  
 SFO2 500.1320005 MHz  
 NUC2 1H  
 CPDPRG[2] waltz16  
 PCPD2 80.00 usec  
 PLW2 12.23400021 W  
 PLW12 0.41870999 W  
 PLW13 0.26797000 W

F2 - Processing parameters  
 SI 32768  
 SF 125.7577890 MHz  
 WDW EM  
 SSB 0  
 LB 1.00 Hz  
 GB 0  
 PC 1.40

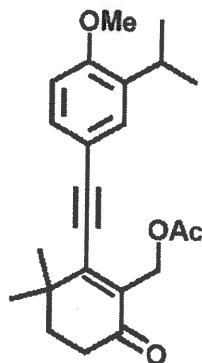

29

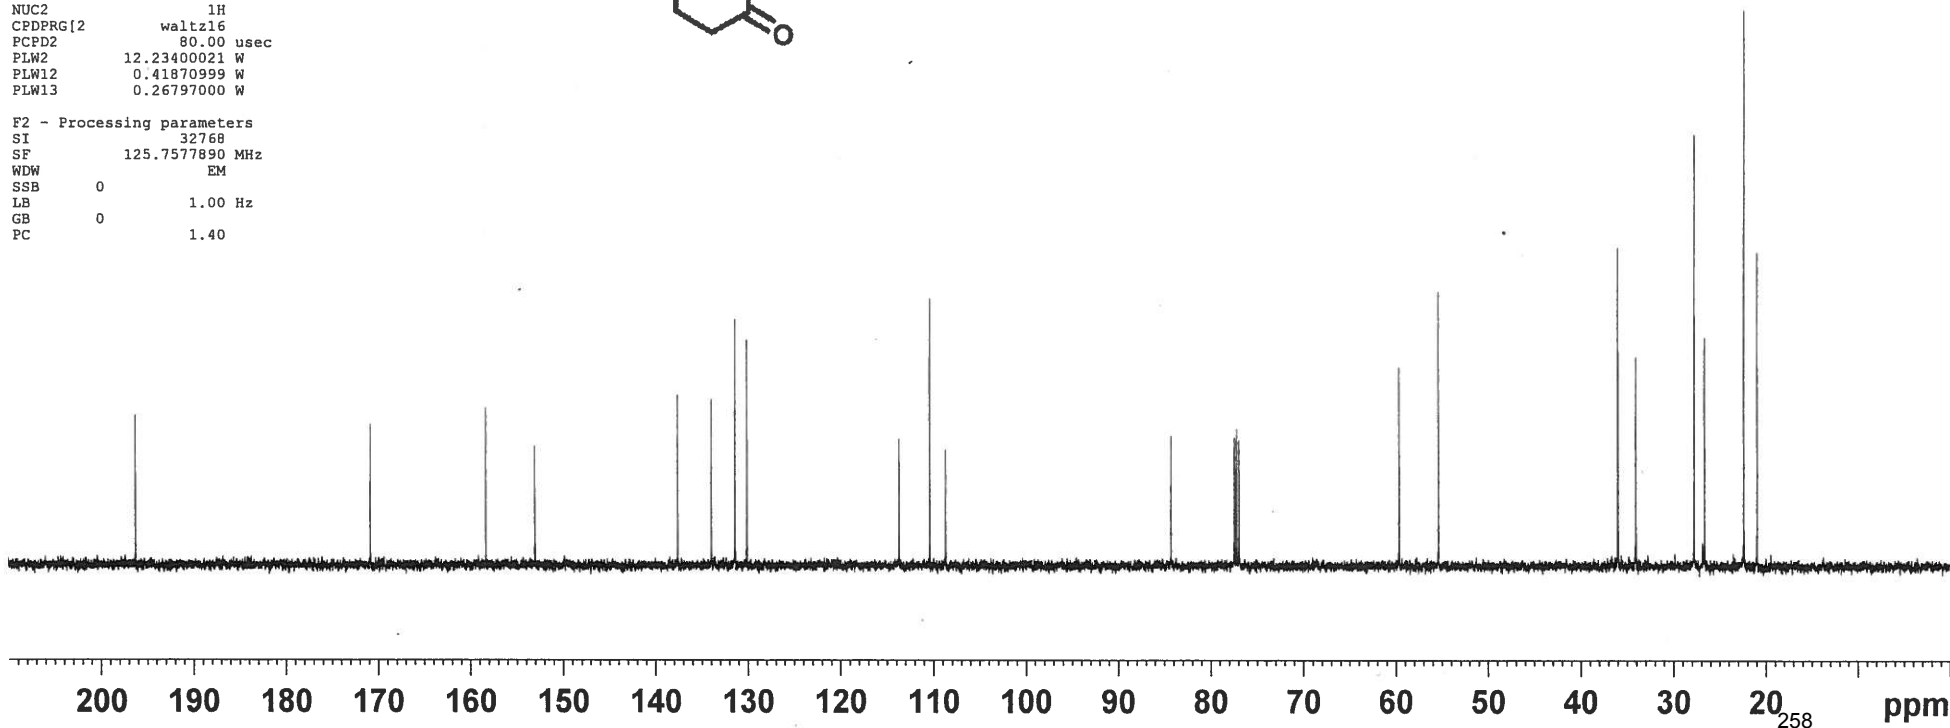

Pisiferin Decomplexed Na<sub>2</sub>HPO<sub>4</sub>  
Experiment 6 Topspin 500 V3.2  
in CD<sub>2</sub>Cl<sub>2</sub>

Current Data Parameters  
NAME Pisiferin Decomplexed Na<sub>2</sub>HPO<sub>4</sub>  
EXPNO 6  
PROCNO 1

F2 - Acquisition Parameters  
Date\_ 20130829  
Time 16.46  
INSTRUM spect  
PROBHD 5 mm PABBO BB/  
PULPROG zg30  
TD 65536  
SOLVENT CD<sub>2</sub>Cl<sub>2</sub>  
NS 8  
DS 2  
SWH 10000.000 Hz  
FIDRES 0.152588 Hz  
AQ 3.2767999 sec  
RG 100.2  
DW 50.000 usec  
DE 6.50 usec  
TE 296.0 K  
D1 1.00000000 sec  
TD0 1

===== CHANNEL f1 =====  
SFO1 500.1330885 MHz  
NUC1 1H  
P1 12.06 usec  
PLW1 18.00000000 W

F2 - Processing parameters  
SI 65536  
SF 500.1300189 MHz  
WDW EM  
SSB 0  
LB 0.35 Hz  
GB 0  
PC 1.00

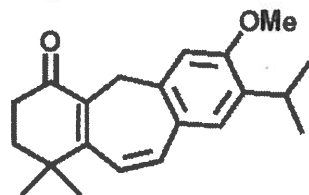

31

7.307  
7.283  
7.150  
6.768  
6.683  
6.659

5.322  
5.320  
5.318

3.849  
3.302  
3.296  
3.289  
3.275  
3.261  
3.248  
3.234  
3.220  
2.436  
2.423  
2.409  
1.838  
1.824  
1.811  
1.198  
1.184

3654.60  
3642.65  
3576.08  
3384.78  
3342.12  
3330.22

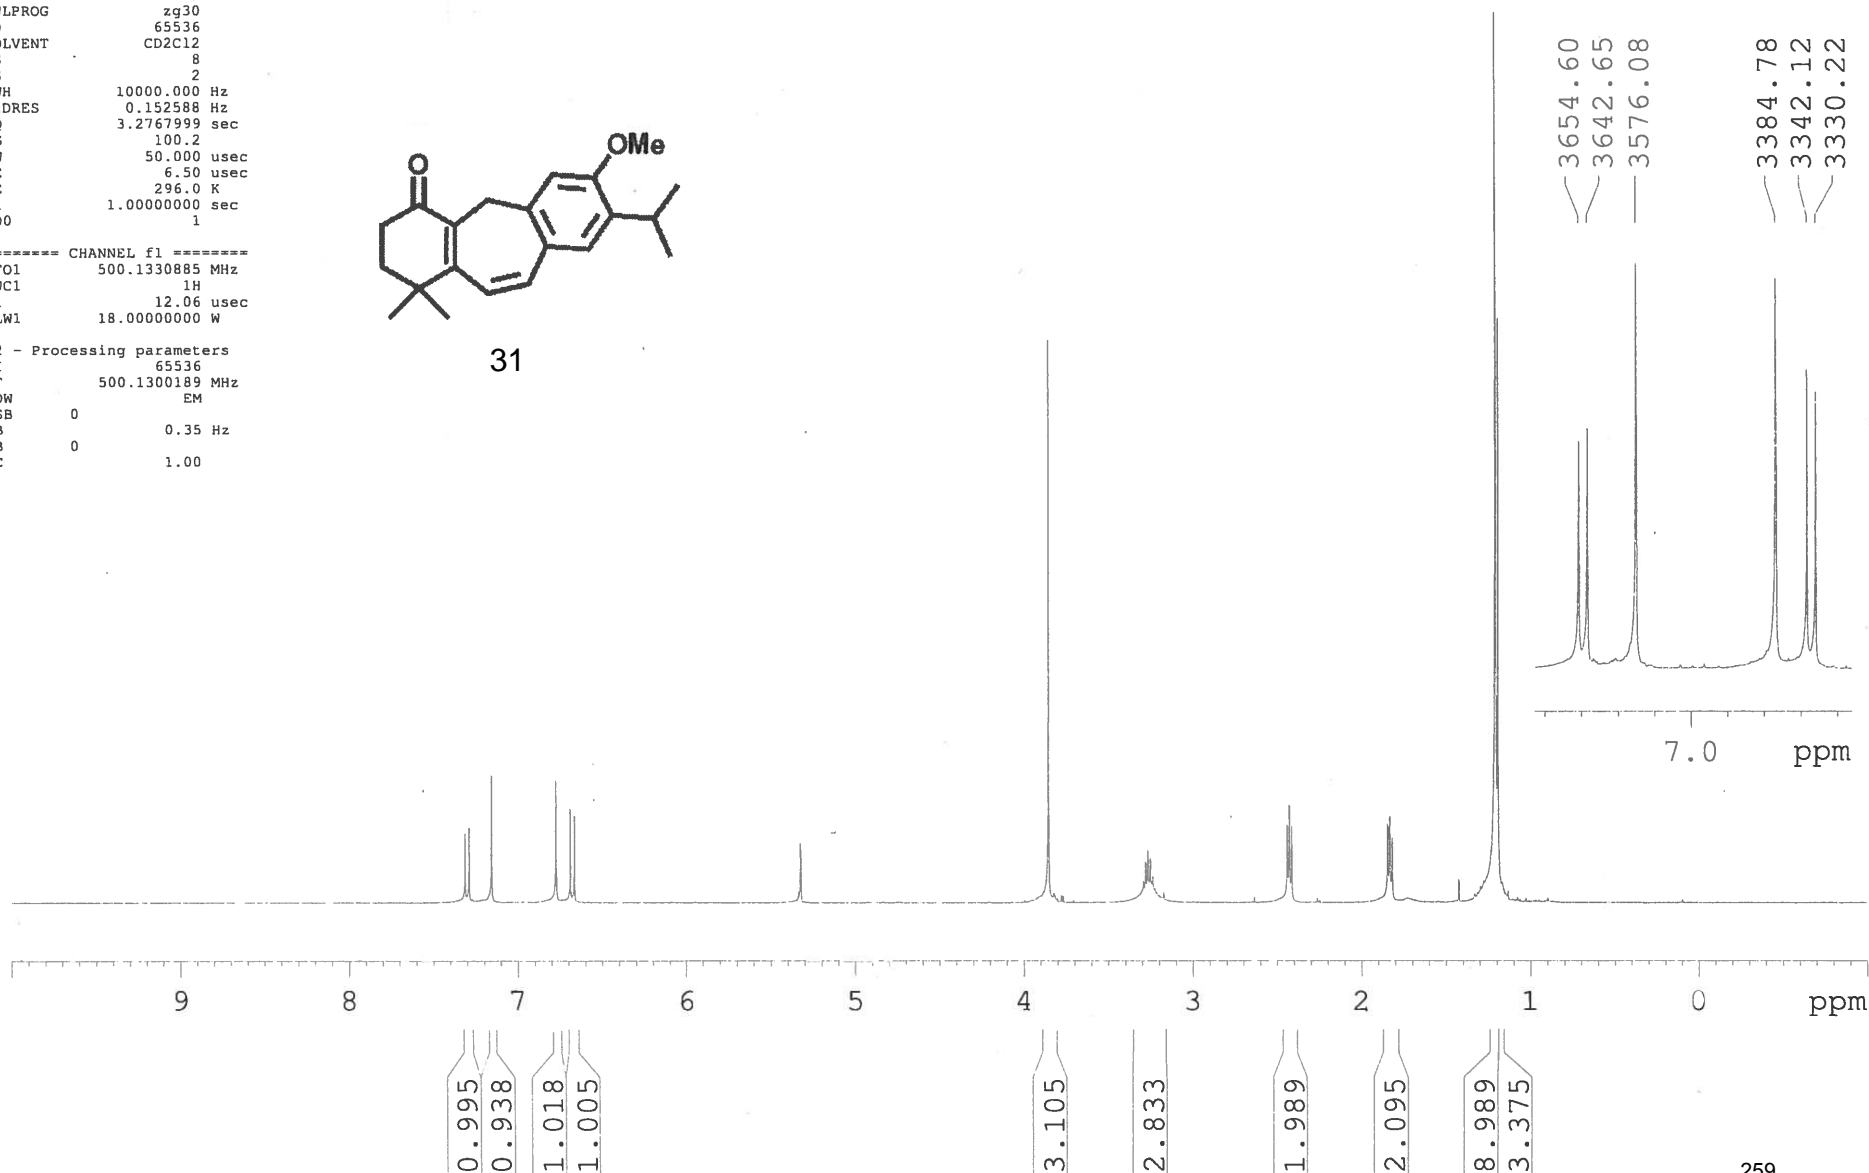

Pisiferin Decomplexed Na<sub>2</sub>HPO<sub>4</sub> 13C  
 Experiment 3 Topspin 300  
 Thursday 29 August 2013  
 In CD<sub>2</sub>Cl<sub>2</sub>

Current Data Parameters  
 NAME Pisiferin Decomplexed Na<sub>2</sub>HPO<sub>4</sub> 13C  
 EXPNO 3  
 PROCNO 1

F2 - Acquisition Parameters  
 Date\_ 20130829  
 Time\_ 20.44  
 INSTRUM spect  
 PROBHD 5 mm BBO BB-1H  
 PULPROG zgpg30  
 TD 32768  
 SOLVENT CDCl<sub>3</sub>  
 NS 1024  
 DS 4  
 SWH 17985.611 Hz  
 FIDRES 0.548877 Hz  
 AQ 0.9110094 sec  
 RG 5160.6  
 DW 27.800 usec  
 DE 6.00 usec  
 TE 300.0 K  
 D1 1.2000000 sec  
 d11 0.0300000 sec  
 DELTA 1.1000000 sec  
 TDO 1

===== CHANNEL f1 =====  
 NUC1 13C  
 P1 14.00 usec  
 PL1 0.00 dB  
 SFO1 75.5004428 MHz

===== CHANNEL f2 =====  
 CPDPRG2 waltz16  
 NUC2 1H  
 PCPD2 70.00 usec  
 PL2 0.00 dB  
 PL12 14.00 dB  
 PL13 19.41 dB  
 SFO2 300.1323000 MHz

F2 - Processing parameters  
 SI 32768  
 SF 75.4928917 MHz  
 WDW EM  
 SSB 0  
 LB 2.00 Hz  
 GB 0  
 PC 1.19

196.29  
 158.79  
 155.87  
 138.37  
 137.07  
 134.57  
 128.26  
 126.04  
 125.85  
 109.28

55.50  
 54.11  
 53.75  
 53.39  
 53.03  
 52.67  
 37.21  
 34.83  
 34.41  
 30.49  
 27.55  
 26.57  
 22.39

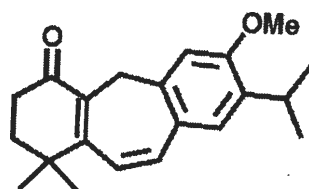

31

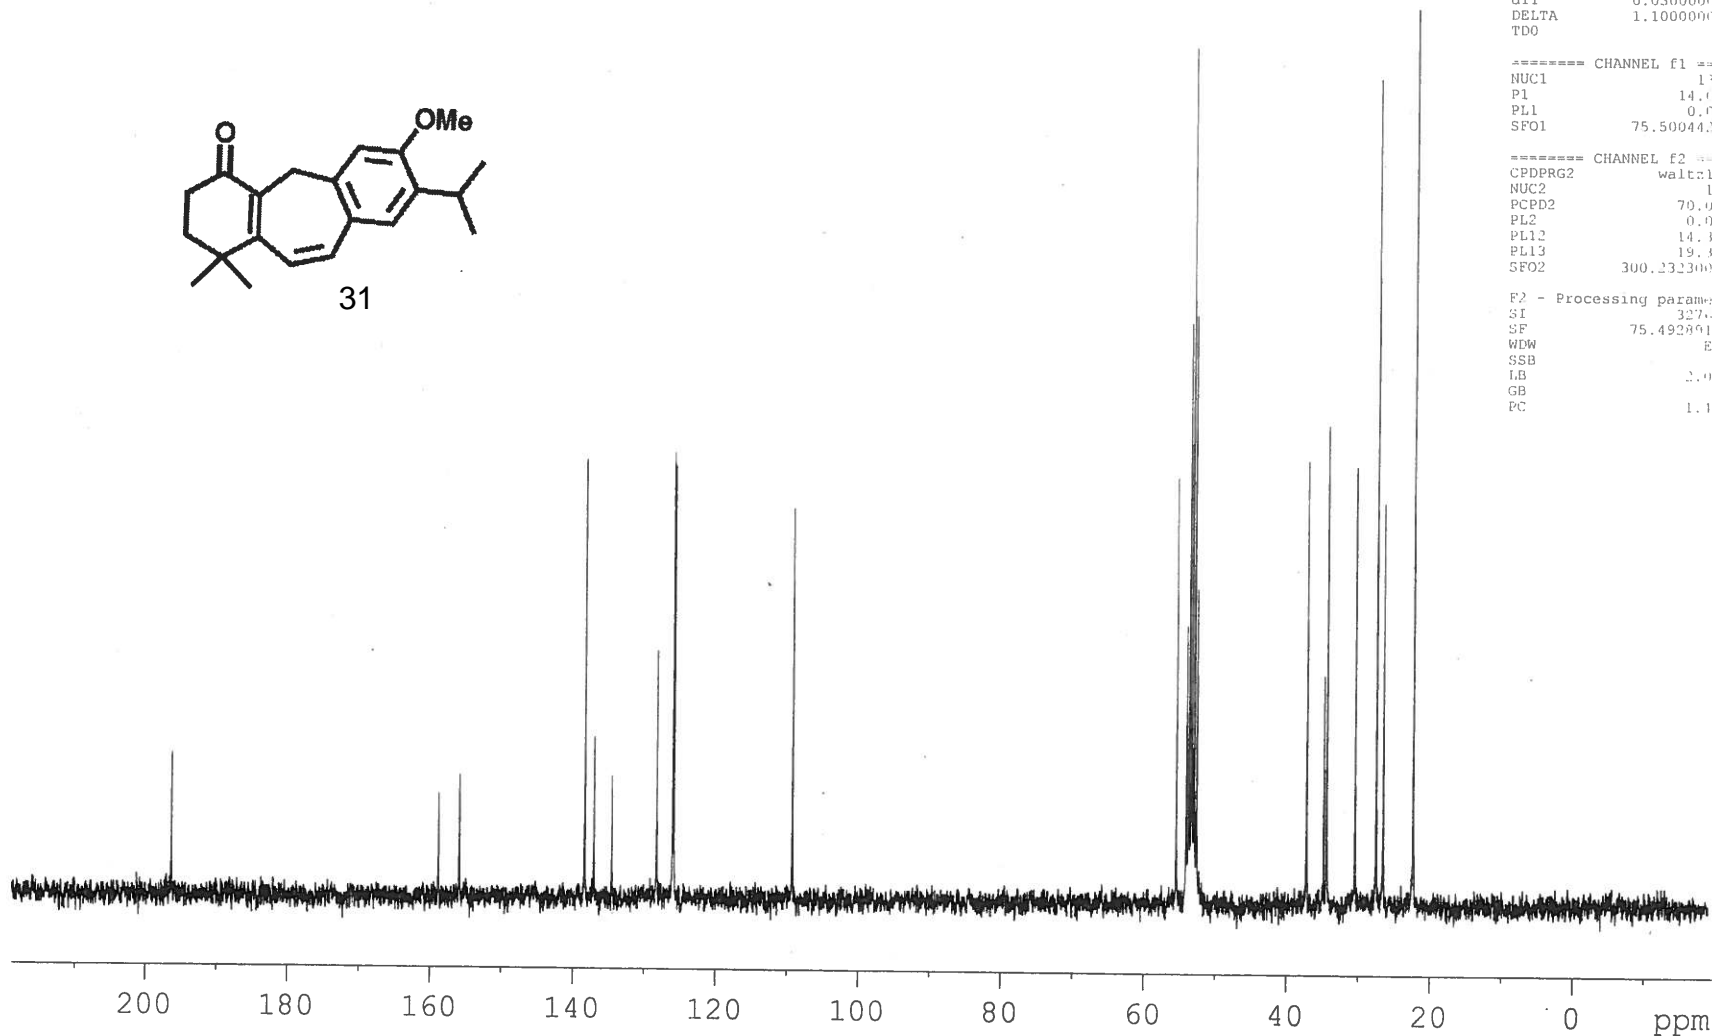

Supplement: c5ob01684c1.pdf [file c5ob01684c1.pdf]
